# Supplementary material
Source: HighWire-hosted journal article supplement (doi:10.1101/rna.078754.121)
Supplement: Supplemental_Table_Legends.docx [file Supplemental_Table_Legends.docx]

**SUPPORTING INFORMATION:**

**Table S1: Overview of datasets used in this study**

**Table S2: circRNA expression in *in vitro* erythroid differentiation**

**Table S3: circRNA expression in in vitro megakaryoid differentiation**

**Table S4: Ribo-seq expression in erythroid and megakaryoid differentiati**
