# Supplementary material
Source: HighWire-hosted journal article supplement (doi:10.1101/rna.078754.121)
Supplement: Supplemental_Table_S1.xlsx [file Supplemental_Table_S1.xlsx]

## Sheet: Sheet1
Table S1: Overview of datasets used in this study
	circRNA, mRNA, ncRNA	Translation efficiency	Translation of circRNA	Proteomics
Erythroid	Heshusius et al., 2019	Mills et al., 2016	Mills et al., 2016	N.A.
Megakaryocytes	This study	This study	This study	N.A.
Platelets	Kissopoulou et al., 2013	Mills et al., 2016	Mills et al., 2016	Van Oorschot et al., 2019
HeLa	Martinez et al., 2020	Martinez et al., 2020	N.A.	N.A.
K562	Martinez et al., 2020	Martinez et al., 2020	N.A.	N.A.
Figure S1:	Study	SRA accession
HSC, MEP	Notta et al., 2016	PRJNA306683
CD42-/+	This study	GSE159579
Cultured MK	Bhatlekar et al., 2020	PRJNA642888
Platelets	Mills et al., 2016; Kissopoulou et al., 2013	PRJNA369543; PRJEB4522
Erythroid (d0->d12)	Heshusius et al., 2019	PRJNA511858
Pro-, basophilic, chromatic, erythroblast	An et al., 2014	PRJNA234281
Ex vivo RBC	Doss et al., 2015	PRJNA268835
