# Supplementary material
Source: HighWire-hosted journal article supplement (doi:10.1101/rna.078754.121)
Supplement: Supplemental_Table_S2.xlsx [file Supplemental_Table_S2.xlsx]

## Sheet: Legend
Nicolet et al.	Table S2: circRNA expression in in vitro erythroid differentiation
Tab name	Description	Unit
LC circRNA	Low confidence circRNA expression in erythroid differentiation	Raw counts
HC circRNA	High confidence circRNA expression in erythroid differentiation	Raw counts
DE HC circRNA	Differentially expressed high confidence circRNA in erythroid differentiation	in RPM (read per million mapped reads)
CLR	Circular-over-linear ratio (CLR) at the circRNA junction site.	Ratio
ncRNA	non-coding RNA expression in erythroid differentiation	TPM
mRNA	protein-coding RNA expression in erythroid differentiation	TPM

## Sheet: LC circRNA
ID	Start	End	A_d0	B_d0	C_d0	D_d0	A_d1	B_d1	C_d1	D_d1	A_d2	B_d2	C_d2	D_d2	A_d3	B_d3	C_d3	D_d3	A_d4	B_d4	C_d4	D_d4	A_d5	B_d5	C_d5	D_d5	A_d6	B_d6	C_d6	D_d6	A_d7	B_d7	C_d7	D_d7	A_d9	B_d9	C_d9	D_d9	A_d12	B_d12	C_d12	D_d12
chr10:100150354-100160014	100150354	100160014	0	0	0	0	0	0	0	0	0	0	0	0	0	0	0	0	0	0	0	0	0	0	0	0	0	0	0	0	0	0	0	0	0	0	0	0	4	0	0	0
chr10:100178035-100179801	100178035	100179801	0	0	0	0	0	0	0	0	0	0	0	0	0	0	1	0	0	0	0	0	0	0	0	0	0	0	0	0	0	0	0	0	0	3	0	0	0	0	0	0
chr10:101421202-101439632	101421202	101439632	0	0	0	0	0	0	0	0	0	0	0	0	0	0	0	0	0	0	0	0	0	0	0	0	2	0	0	0	0	0	0	0	0	0	0	0	0	0	0	0
chr10:101959727-101964956	101959727	101964956	0	0	0	0	0	0	0	0	0	0	0	0	0	0	0	0	0	0	0	0	0	0	0	0	0	0	0	0	0	0	0	0	4	0	5	0	0	0	0	0
chr10:102003454-102010089	102003454	102010089	0	0	0	0	0	0	0	0	0	0	0	0	0	0	0	0	0	0	0	0	0	0	1	0	0	0	0	0	0	0	0	0	0	0	2	2	0	0	0	0
chr10:102683731-102685776	205367462	205371552	2	4	0	1	1	1	1	1	1	0	1	2	3	1	1	3	0	2	1	0	1	3	0	0	3	2	0	1	1	0	0	0	4	4	0	1	0	0	0	0
chr10:102697158-102703885	102697158	102703885	0	0	0	0	0	0	0	0	0	0	1	0	0	0	0	2	0	0	0	0	0	0	0	0	0	0	0	0	0	2	0	0	0	0	0	0	0	0	0	0
chr10:103281395-103285956	103281395	103285956	0	0	0	0	0	0	0	0	0	0	0	0	0	0	0	0	0	1	0	0	1	0	2	0	0	0	0	0	0	0	0	0	0	3	0	0	0	0	0	0
chr10:103281395-103296410	103281395	103296410	0	0	0	0	0	0	0	0	0	0	0	0	0	0	0	0	0	0	0	0	0	0	1	0	0	0	0	0	0	3	0	0	0	0	0	0	3	0	0	0
chr10:103281395-103298128	103281395	103298128	0	0	0	0	0	0	0	2	0	0	0	0	0	1	0	0	0	1	0	0	0	0	0	0	0	2	0	0	0	0	0	0	0	0	3	1	0	0	0	0
chr10:103384501-103436193	103384501	103436193	0	0	0	0	0	0	0	0	0	0	0	0	1	0	0	0	0	0	0	0	0	2	0	1	0	0	0	0	0	0	0	0	0	0	0	0	0	0	0	0
chr10:103427642-103436193	206855284	206872386	1	0	4	0	2	0	0	1	1	1	0	1	1	1	0	2	1	0	0	1	0	0	0	0	0	0	0	1	0	0	0	0	0	0	4	1	0	0	0	0
chr10:103432671-103436193	103432671	103436193	2	1	0	0	0	0	0	0	0	0	0	0	0	1	0	0	0	0	0	0	0	0	0	0	0	0	0	0	2	0	0	0	0	0	0	0	0	0	0	0
chr10:103547120-103565900	103547120	103565900	0	0	0	0	0	0	0	0	0	0	0	0	0	0	0	0	0	0	0	0	0	0	0	0	0	0	0	0	0	0	0	0	0	0	4	0	0	0	0	0
chr10:103547120-103567658	103547120	103567658	0	0	0	0	0	0	0	0	0	0	0	0	0	0	0	0	0	0	0	0	0	0	0	0	0	0	0	0	0	0	0	0	3	1	0	0	0	0	0	0
chr10:103550652-103553755	103550652	103553755	0	0	0	0	0	0	0	0	0	0	0	0	0	0	0	0	0	0	0	0	0	0	0	0	0	0	0	0	0	0	0	0	0	3	0	1	0	0	0	0
chr10:103552595-103557911	103552595	103557911	0	0	0	0	0	0	0	0	0	0	0	0	0	0	0	0	0	0	0	0	0	0	0	0	1	0	0	0	0	2	0	0	0	0	0	0	0	0	0	0
chr10:103552595-103560157	103552595	103560157	0	0	0	0	0	0	0	0	0	0	0	0	0	0	0	0	0	0	0	0	0	1	0	0	0	2	0	0	0	0	0	0	0	0	1	0	1	0	0	0
chr10:103552595-103567658	103552595	103567658	0	0	0	0	0	0	0	0	0	0	0	0	1	0	0	0	0	0	0	0	0	0	1	0	0	1	0	1	0	0	0	0	0	1	3	0	0	0	0	0
chr10:103552595-103570071	103552595	103570071	0	1	1	0	0	0	0	0	0	1	0	0	1	0	0	0	0	2	1	3	3	0	1	3	3	2	1	1	2	0	0	0	5	4	8	0	3	0	0	0
chr10:103552595-103573363	103552595	103573363	0	0	0	1	0	1	1	0	0	0	0	0	0	0	0	1	0	0	0	1	0	1	0	0	0	1	1	0	3	2	0	0	0	0	0	2	1	0	0	0
chr10:103557736-103560157	207115472	207120314	0	0	0	0	0	0	0	0	1	0	0	0	0	0	0	0	0	0	0	0	0	0	0	0	0	1	0	1	3	0	0	3	0	4	1	1	0	0	0	0
chr10:103557736-103567658	103557736	103567658	0	0	0	0	2	0	0	0	0	0	0	0	0	0	0	0	0	0	1	1	0	0	0	0	0	0	0	0	0	3	0	0	11	4	1	1	0	0	0	0
chr10:103557736-103570071	103557736	103570071	0	0	0	0	0	2	0	0	0	1	0	0	0	0	0	2	0	0	2	1	0	1	0	0	2	0	1	0	1	0	0	1	6	4	0	0	0	0	0	0
chr10:103557736-103573363	103557736	103573363	1	0	0	0	0	0	0	0	0	1	1	0	1	0	0	0	0	0	0	0	0	0	0	0	0	2	0	0	4	0	0	0	2	0	1	3	0	10	0	0
chr10:103558598-103559212	103558598	103559212	0	0	0	0	0	0	0	0	0	0	0	0	0	0	0	0	0	0	0	0	0	0	0	0	0	0	0	0	0	0	0	0	0	6	1	3	0	0	0	0
chr10:103558598-103560157	207117196	207120314	0	0	1	0	0	0	0	0	0	0	0	0	0	0	0	0	0	0	1	0	0	1	1	0	0	6	1	1	0	2	0	9	2	7	12	1	0	0	6	2
chr10:103558598-103563776	103558598	103563776	0	0	0	0	0	0	0	0	0	0	0	0	0	0	0	0	0	0	0	0	0	0	0	0	0	0	0	0	3	11	0	0	4	0	2	2	4	0	0	0
chr10:103558598-103565900	103558598	103565900	0	0	0	0	0	0	0	0	0	0	0	0	0	0	0	0	0	0	0	0	0	0	0	0	4	2	0	0	0	0	0	0	0	0	2	1	0	0	0	0
chr10:103558598-103567658	103558598	103567658	0	0	0	0	0	0	0	0	0	0	0	0	0	0	0	0	0	0	0	0	0	0	0	1	0	1	1	2	5	0	13	4	0	7	4	1	10	0	0	0
chr10:103558598-103570071	103558598	103570071	0	0	0	0	0	0	0	0	0	0	0	1	0	0	0	1	1	0	0	0	0	0	1	1	0	0	0	0	2	0	0	0	0	0	0	0	4	0	0	0
chr10:103558598-103573363	103558598	103573363	0	0	0	0	1	0	0	0	0	0	0	0	0	0	0	0	0	0	0	0	0	1	0	0	0	1	0	0	1	2	0	9	0	1	6	1	0	0	5	0
chr10:103559998-103563776	103559998	103563776	0	0	0	0	0	0	0	0	0	0	0	0	0	0	0	0	0	0	0	0	0	0	1	0	0	0	0	0	0	0	12	0	0	2	0	0	0	0	0	0
chr10:103559998-103565900	103559998	103565900	0	0	0	0	0	0	0	0	0	0	0	0	0	0	0	0	0	0	0	0	0	0	0	0	0	0	0	0	0	0	0	0	0	0	0	0	3	0	0	0
chr10:103563491-103567658	103563491	103567658	0	0	0	0	0	0	0	0	0	0	0	0	0	0	0	0	0	0	0	0	0	0	0	0	0	0	0	1	0	0	0	0	0	0	2	2	0	0	0	0
chr10:103565801-103567658	103565801	103567658	0	0	0	0	0	0	0	0	0	0	0	0	0	0	0	0	0	0	0	1	0	0	0	0	0	3	1	0	0	0	0	0	0	0	3	1	0	0	0	0
chr10:103565801-103570071	103565801	103570071	0	0	1	0	0	0	0	0	0	0	0	0	0	0	0	0	0	0	0	0	0	0	0	0	0	0	0	0	0	0	0	0	0	0	2	2	0	0	0	0
chr10:103649168-103766390	103649168	103766390	0	0	0	0	0	0	0	0	0	0	2	0	0	0	0	0	0	0	0	0	0	0	0	0	0	0	0	0	0	0	0	0	0	0	0	0	0	0	0	0
chr10:103649168-103789502	103649168	103789502	0	0	0	0	0	0	0	0	0	0	0	0	0	0	0	0	0	0	0	0	0	0	0	0	0	0	0	0	0	0	0	0	0	2	0	0	0	0	0	0
chr10:103699619-103717489	103699619	103717489	0	0	0	0	0	0	0	0	0	0	0	0	0	0	0	0	0	1	0	0	0	0	0	0	0	0	0	0	4	0	0	0	0	0	0	2	0	0	0	0
chr10:103699619-103750368	103699619	103750368	0	0	0	0	0	0	0	0	0	0	0	0	0	0	0	0	0	0	0	0	0	0	0	0	0	0	0	0	2	0	0	0	0	0	0	0	0	0	0	0
chr10:103699619-103753360	103699619	103753360	0	0	0	0	0	0	0	0	0	0	0	0	0	0	0	0	0	0	0	0	0	0	0	0	0	0	0	0	0	0	0	0	0	0	0	0	0	0	2	0
chr10:103699619-103755112	103699619	103755112	0	0	0	0	0	0	0	0	0	0	0	0	0	0	0	0	0	0	0	0	0	0	0	0	0	0	0	0	0	0	0	0	0	0	0	3	0	0	0	0
chr10:103716353-103717489	103716353	103717489	0	0	0	0	0	0	0	0	0	0	0	0	0	0	0	0	0	0	0	0	0	0	0	0	0	0	0	0	0	0	0	0	0	0	0	0	0	0	2	0
chr10:103734968-103766390	103734968	103766390	0	0	0	0	0	0	0	0	0	0	0	0	0	0	0	0	0	0	0	0	0	0	0	0	0	0	0	0	0	0	0	0	0	0	0	0	2	0	0	0
chr10:103750307-103766390	103750307	103766390	0	0	0	0	0	0	0	0	0	0	0	0	0	0	0	0	0	0	0	0	1	0	0	0	2	0	1	1	0	0	0	0	0	7	4	5	0	0	2	0
chr10:103753294-103766390	103753294	103766390	0	0	0	0	0	0	0	0	0	0	0	0	0	0	0	0	0	0	0	0	0	0	0	0	0	0	0	0	0	0	0	0	0	0	0	2	0	0	0	0
chr10:103783233-103789502	103783233	103789502	0	0	0	0	0	0	0	0	0	0	0	0	0	0	0	0	0	0	0	0	0	0	0	0	0	0	0	0	0	0	0	0	0	0	0	3	0	0	0	0
chr10:103870625-103871293	103870625	103871293	0	0	0	0	0	0	0	0	0	0	0	0	0	0	0	0	0	0	0	0	0	0	0	0	0	0	0	0	0	0	0	0	0	0	0	0	5	0	0	0
chr10:103916775-103917971	103916775	103917971	0	0	0	0	0	0	0	0	0	0	0	0	0	1	0	0	0	0	0	0	0	1	0	0	0	1	0	2	1	5	0	0	0	4	1	1	1	0	0	0
chr10:103916775-103920850	103916775	103920850	0	0	0	0	0	0	0	2	0	0	0	0	0	0	0	0	0	0	0	0	0	0	0	0	0	0	0	0	0	0	0	0	0	0	0	0	0	0	0	0
chr10:104128967-104130617	104128967	104130617	0	0	0	0	0	0	0	0	0	0	0	0	0	0	0	0	0	0	0	0	0	0	0	0	0	0	0	0	0	0	0	0	0	0	0	4	0	0	0	0
chr10:104160703-104161916	104160703	104161916	0	0	0	0	0	0	0	0	0	0	0	0	0	0	0	0	0	0	0	0	0	0	0	0	0	0	0	0	0	0	0	0	0	0	2	0	0	0	0	0
chr10:1041868-1046953	1041868	1046953	0	0	0	0	0	0	0	0	0	0	0	0	0	0	0	0	0	0	0	0	0	0	0	0	0	0	0	0	0	0	8	0	0	0	0	0	0	0	0	0
chr10:104243916-104245490	104243916	104245490	0	0	0	0	0	0	0	0	0	0	0	0	0	0	0	0	0	0	0	0	1	0	0	0	0	0	0	0	0	0	0	0	0	3	0	0	0	0	0	0
chr10:104352338-104359301	104352338	104359301	1	0	0	0	0	0	0	0	0	0	0	0	0	0	0	0	0	0	0	0	0	0	0	0	0	0	0	0	0	0	0	0	0	0	0	0	3	0	0	0
chr10:1044942-1053068	1044942	1053068	0	0	0	0	0	0	0	0	0	0	0	0	0	0	0	0	0	0	0	0	0	0	0	0	0	0	0	1	2	0	0	0	0	0	0	2	0	0	0	0
chr10:1044942-1055520	1044942	1055520	0	0	0	0	0	0	0	0	0	0	0	0	0	0	0	0	0	0	0	0	0	0	0	0	0	1	0	0	2	0	0	0	0	0	2	0	0	0	0	0
chr10:104809463-104816721	104809463	104816721	0	0	0	0	0	0	0	1	0	2	0	0	0	0	0	0	0	0	0	0	0	0	0	0	0	0	0	0	0	0	0	0	0	2	0	0	0	0	0	0
chr10:104809463-104828479	104809463	104828479	0	0	0	0	0	0	0	0	1	0	0	0	0	0	0	0	0	0	0	0	0	0	0	0	2	0	0	0	0	0	0	0	0	0	0	0	0	0	0	0
chr10:104809463-104836027	104809463	104836027	0	0	0	0	0	0	0	0	0	0	0	0	0	0	0	0	0	0	0	0	0	0	0	0	0	0	0	1	0	0	0	0	0	0	0	0	2	0	0	0
chr10:104814085-104828479	104814085	104828479	0	0	0	0	0	0	0	0	0	0	0	0	0	0	0	0	0	0	0	0	0	0	0	0	0	0	0	0	0	3	0	0	0	0	0	0	0	0	0	0
chr10:104851320-104854212	104851320	104854212	0	0	0	0	0	0	0	0	0	0	0	0	0	0	0	0	0	0	0	0	0	0	0	0	1	0	0	0	2	0	0	0	0	3	2	0	0	9	0	0
chr10:104851320-104934739	104851320	104934739	0	0	0	0	0	0	0	0	0	0	0	0	0	0	0	0	0	0	0	0	0	0	0	0	0	0	0	0	0	3	0	0	0	3	0	0	0	0	0	0
chr10:104852895-104855737	104852895	104855737	0	0	0	0	0	0	0	0	0	0	0	0	0	0	0	0	0	0	0	0	0	0	0	0	0	0	0	0	2	0	0	0	0	0	0	0	0	0	0	0
chr10:104855695-104865558	104855695	104865558	0	0	0	0	0	0	0	0	0	0	0	0	0	0	0	0	0	0	0	0	0	0	0	0	0	0	0	0	0	0	0	0	7	0	0	0	0	0	0	0
chr10:104859682-104934739	104859682	104934739	0	0	0	0	0	0	0	0	0	0	0	0	0	0	0	0	2	0	0	0	0	0	0	0	0	0	0	0	0	0	0	0	0	3	0	0	0	0	0	0
chr10:104860801-104934739	104860801	104934739	0	0	0	0	0	0	0	0	0	0	0	0	0	0	0	0	0	0	0	0	0	0	0	0	0	0	0	0	1	0	0	0	0	0	0	0	7	0	0	0
chr10:104896005-104934739	104896005	104934739	0	0	0	0	0	0	0	0	0	0	0	0	0	0	0	0	0	0	0	0	0	0	0	0	0	0	0	0	0	0	0	0	0	0	4	0	0	0	0	0
chr10:104896005-104941085	104896005	104941085	0	0	0	0	0	0	0	0	0	0	0	0	0	0	0	0	0	0	0	0	0	0	0	0	0	0	0	0	0	2	0	0	0	0	0	0	0	0	0	0
chr10:104899162-104934739	104899162	104934739	0	0	0	0	0	0	0	0	0	0	0	0	0	0	0	0	0	0	0	0	0	0	0	0	0	0	0	2	1	0	0	0	0	0	0	1	0	0	0	0
chr10:104899162-104941085	104899162	104941085	0	0	0	0	0	0	0	0	0	0	0	0	0	0	0	0	1	0	0	0	2	0	0	0	0	0	0	0	0	0	0	0	7	0	0	0	0	0	0	0
chr10:104934614-104934739	104934614	104934739	0	0	0	0	0	0	0	0	0	0	0	0	0	0	0	0	0	0	0	0	0	0	0	0	0	0	0	0	0	0	0	0	3	0	0	0	0	0	0	0
chr10:105106994-105108756	105106994	105108756	1	0	0	0	0	1	0	0	1	0	0	0	0	0	1	0	0	0	1	0	1	0	0	1	0	0	0	0	1	0	1	4	10	0	0	0	0	0	0	0
chr10:105133114-105139776	105133114	105139776	0	0	0	0	0	0	0	0	0	0	0	0	0	0	0	0	0	0	0	0	0	0	0	0	0	0	0	0	0	0	0	0	0	0	0	2	0	7	0	0
chr10:105133114-105143124	105133114	105143124	0	0	0	0	0	0	0	0	0	0	0	0	0	0	0	1	0	0	0	0	0	0	0	0	0	0	0	0	0	0	0	0	2	0	0	0	0	0	0	0
chr10:105160153-105176499	105160153	105176499	0	0	0	0	0	0	0	0	0	0	0	0	0	0	0	0	0	0	0	0	0	0	0	0	0	0	0	0	0	0	0	0	0	2	0	0	0	0	0	0
chr10:105197771-105198565	105197771	105198565	3	4	1	1	0	0	0	0	0	3	0	1	0	0	1	1	1	1	1	0	0	0	0	0	0	0	0	2	0	0	0	0	0	0	2	5	0	0	0	0
chr10:105199502-105200607	105199502	105200607	3	1	0	0	1	0	1	0	1	0	0	0	0	1	1	0	0	0	0	4	0	0	0	0	0	0	0	0	0	0	0	0	0	0	0	0	0	0	0	0
chr10:105200046-105201732	105200046	105201732	0	0	0	0	0	0	0	0	0	0	0	0	0	0	0	0	0	0	0	0	0	0	0	0	0	0	0	0	0	0	0	0	0	0	2	0	0	0	0	0
chr10:105750432-105752891	105750432	105752891	0	0	0	0	0	0	0	0	0	0	0	0	0	0	0	0	0	0	0	0	0	0	0	0	0	0	0	0	3	0	0	0	0	0	0	0	0	0	0	0
chr10:105761201-105763285	105761201	105763285	0	0	0	0	0	0	0	0	0	0	0	0	0	0	0	0	0	0	0	0	0	0	0	0	0	0	0	0	0	0	0	3	0	0	0	0	0	0	0	0
chr10:105767934-105778047	211535868	211556094	0	0	0	0	0	0	0	0	0	0	0	0	0	0	0	0	0	0	0	0	0	0	0	0	0	0	0	0	0	3	0	3	6	0	0	2	0	0	0	0
chr10:105767934-105778666	105767934	105778666	1	1	0	0	0	0	0	0	0	0	0	0	0	1	1	0	0	1	0	0	0	1	0	0	5	1	0	0	2	0	0	2	8	18	4	4	7	0	1	0
chr10:106118098-106139978	106118098	106139978	0	0	0	0	1	1	0	0	0	0	0	0	0	0	0	0	0	0	0	0	0	0	0	0	0	0	0	0	0	0	0	0	6	0	0	0	0	0	0	0
chr10:111642189-111651584	111642189	111651584	0	0	0	0	0	0	0	0	0	0	0	0	0	0	0	0	0	0	0	0	0	0	0	0	5	0	0	0	0	0	0	0	0	0	0	0	0	0	0	0
chr10:1118055-1123943	1118055	1123943	0	0	0	0	0	0	0	0	0	0	0	0	0	0	0	0	0	0	0	0	0	0	0	0	0	0	0	0	0	0	0	0	0	0	2	0	0	0	0	0
chr10:1118055-1126416	1118055	1126416	0	0	0	1	1	0	0	0	0	0	0	0	0	1	0	0	0	0	1	0	0	0	0	0	0	0	0	0	0	0	0	0	0	7	7	1	0	0	0	0
chr10:111835375-111865811	111835375	111865811	0	0	0	0	0	0	0	0	0	0	0	0	0	0	0	0	0	0	0	0	0	0	2	0	0	0	0	0	0	0	0	0	0	0	0	0	0	0	0	0
chr10:111878968-111890244	111878968	111890244	0	0	0	0	0	0	0	0	0	0	0	0	0	0	0	0	0	0	0	0	0	0	0	0	0	0	0	0	0	2	0	0	0	0	0	0	0	0	0	0
chr10:111883774-111886261	111883774	111886261	0	0	0	0	0	0	0	0	0	0	0	0	0	0	0	0	0	0	0	0	0	0	0	0	0	0	0	0	0	0	0	0	4	6	5	0	0	0	0	0
chr10:111883774-111890244	111883774	111890244	0	0	0	0	0	0	0	0	0	1	0	0	0	0	0	0	0	0	0	0	0	0	1	2	0	2	1	1	3	1	0	0	4	0	0	3	3	0	2	0
chr10:111883774-111892158	111883774	111892158	0	0	0	0	0	0	0	0	0	0	0	0	0	0	0	0	0	0	0	0	0	0	0	0	0	0	0	0	0	2	0	0	1	0	2	0	0	0	0	0
chr10:112020756-112039843	112020756	112039843	0	0	0	0	0	0	0	0	0	0	0	0	0	0	0	0	0	0	0	0	0	0	0	0	0	0	0	0	0	0	0	0	4	0	0	0	0	0	0	0
chr10:112054985-112057486	112054985	112057486	0	0	0	0	0	0	0	0	0	0	0	0	0	0	0	0	0	0	0	0	0	0	0	0	0	0	0	0	2	0	1	0	0	0	0	0	0	0	0	0
chr10:112057324-112058548	112057324	112058548	0	0	0	0	0	0	0	0	0	0	0	0	0	0	0	0	0	0	0	0	0	0	0	0	0	0	0	0	0	0	0	0	0	0	2	0	0	0	0	0
chr10:112057324-112063345	112057324	112063345	0	0	0	0	0	0	0	0	0	0	0	0	0	0	0	0	0	0	0	0	0	0	0	0	0	0	0	0	2	0	0	0	0	0	0	0	0	0	0	0
chr10:112328695-112349749	112328695	112349749	0	0	0	0	0	0	0	0	0	0	0	0	0	0	0	0	0	0	0	0	0	0	0	0	0	0	0	0	0	3	0	0	0	0	0	0	0	0	0	0
chr10:112340661-112350330	112340661	112350330	0	0	0	0	0	0	0	0	0	0	0	0	0	0	0	0	0	0	0	0	0	0	0	0	0	0	0	0	0	0	0	0	0	3	0	0	0	0	0	0
chr10:112341680-112342400	112341680	112342400	0	0	0	0	0	0	0	0	0	0	0	0	0	0	0	0	0	0	0	0	0	0	0	0	0	0	0	0	0	0	0	0	0	2	0	0	0	0	0	0
chr10:112341680-112344154	112341680	112344154	0	0	0	0	0	0	0	0	0	0	0	0	0	0	0	0	0	0	0	0	0	1	0	0	0	0	0	0	0	0	0	0	0	0	5	0	0	0	0	0
chr10:112343141-112352981	112343141	112352981	0	0	0	0	0	0	0	0	0	0	0	0	0	0	0	0	0	0	0	0	0	0	0	0	0	0	0	0	0	2	0	0	0	0	0	0	0	0	0	0
chr10:112349362-112352981	112349362	112352981	0	0	0	0	0	0	0	0	0	0	0	0	0	0	0	0	0	0	0	0	0	0	0	0	0	0	0	0	0	0	0	0	0	0	0	2	0	0	0	0
chr10:112349362-112358048	112349362	112358048	0	0	0	0	0	0	0	0	0	0	0	0	0	0	0	0	0	0	0	0	0	0	0	0	0	0	0	0	0	3	0	0	0	0	0	0	0	0	0	0
chr10:112352830-112358048	112352830	112358048	0	0	0	0	0	0	0	0	0	0	0	0	0	0	0	1	0	0	0	0	0	0	0	0	0	0	0	0	0	0	0	0	0	2	0	1	0	0	0	0
chr10:112356155-112358048	112356155	112358048	0	1	0	1	0	0	1	0	3	0	1	3	5	0	1	3	0	2	2	0	1	0	0	0	1	0	1	2	1	1	7	0	0	0	1	4	0	0	0	12
chr10:1125950-1126416	1125950	1126416	0	1	1	0	0	0	0	0	0	0	0	1	0	2	0	0	0	0	0	0	0	0	0	0	0	0	0	0	0	0	0	0	0	0	8	0	0	0	0	0
chr10:1125950-1132297	1125950	1132297	0	0	0	0	0	0	0	0	0	0	0	0	0	2	0	0	0	0	0	0	0	0	0	0	0	0	0	0	0	0	0	0	0	0	0	0	0	0	0	0
chr10:112635723-112641293	112635723	112641293	0	0	0	0	0	0	0	0	0	0	0	0	0	0	0	0	0	1	0	0	0	0	0	0	2	0	0	0	0	0	0	0	0	0	0	0	0	0	0	0
chr10:112640990-112642855	112640990	112642855	0	0	0	0	0	0	2	0	0	0	0	0	0	0	0	0	0	0	0	0	0	0	0	0	0	0	0	0	3	0	0	6	0	0	0	3	0	0	0	0
chr10:112640990-112647644	112640990	112647644	0	0	0	0	0	1	0	0	0	0	0	0	0	0	0	0	0	0	0	0	0	0	0	0	0	0	2	0	0	0	0	0	0	0	0	0	0	0	0	0
chr10:112640990-112654280	112640990	112654280	0	0	0	0	0	0	0	0	0	0	0	0	0	0	0	0	0	0	0	0	0	0	0	0	0	0	0	0	0	0	0	0	3	0	1	0	0	0	0	0
chr10:112641032-112645124	112641032	112645124	0	0	0	0	0	0	0	0	0	0	0	0	0	0	0	0	0	0	0	0	0	0	0	0	0	0	0	0	0	0	0	0	0	0	3	0	0	0	0	0
chr10:112641032-112650428	112641032	112650428	0	0	0	0	0	0	0	0	0	0	0	0	0	0	0	0	0	0	0	0	0	0	0	0	0	0	0	0	0	0	0	0	0	0	0	2	0	0	0	0
chr10:112645010-112647644	112645010	112647644	0	0	0	0	0	0	0	0	0	0	0	0	0	0	0	0	0	0	0	0	0	0	0	0	0	0	0	0	0	0	0	0	0	5	0	0	0	0	0	0
chr10:112645010-112650428	225290020	225300856	0	0	0	1	0	0	0	0	0	0	0	0	1	1	0	0	0	0	0	0	0	0	0	0	1	0	0	2	0	0	0	0	0	3	6	5	0	0	5	0
chr10:112711365-112724819	112711365	112724819	0	0	0	0	0	0	0	0	0	0	0	1	0	1	0	0	0	0	0	1	0	0	0	0	0	0	0	0	0	0	0	0	4	4	0	0	0	0	0	0
chr10:112723882-112724819	112723882	112724819	0	0	0	0	0	0	0	0	0	0	0	0	0	0	0	0	0	0	0	0	0	0	1	0	0	0	0	0	2	4	0	0	1	1	2	4	5	0	0	0
chr10:112723882-112745523	225447764	225491046	1	1	0	1	1	0	0	0	0	1	1	1	1	0	1	0	2	1	1	0	1	0	0	0	0	3	0	1	2	7	0	0	2	1	6	1	5	0	9	0
chr10:112723882-112760303	112723882	112760303	0	0	0	0	0	0	0	0	0	0	0	0	0	0	0	0	0	0	0	0	0	0	0	0	0	0	0	0	0	0	0	0	0	5	3	0	0	0	0	0
chr10:112760172-112767411	112760172	112767411	0	0	0	0	0	0	0	0	0	0	0	0	0	0	0	0	0	0	0	0	0	0	0	0	0	0	0	0	0	0	0	0	0	0	0	2	0	0	0	0
chr10:1130342-1142186	1130342	1142186	0	2	1	1	0	0	0	0	0	1	0	0	0	0	1	0	1	0	0	0	0	1	0	0	0	0	0	1	0	0	0	0	1	0	0	0	0	0	0	0
chr10:114220282-114224416	114220282	114224416	0	0	0	0	0	0	0	0	0	0	0	0	0	0	0	0	0	0	0	0	0	0	0	0	0	0	0	0	0	0	0	0	0	0	0	0	0	0	5	0
chr10:11523768-11527910	11523768	11527910	1	0	0	0	0	0	0	0	0	0	0	0	0	0	1	0	1	1	1	0	1	0	1	0	0	0	0	0	0	0	0	0	11	7	3	0	3	0	0	0
chr10:11523768-11535227	11523768	11535227	0	0	0	0	0	0	0	0	0	0	0	0	0	0	0	0	0	0	0	0	0	0	0	0	0	0	0	0	0	0	0	0	0	0	0	0	0	0	5	0
chr10:11523768-11543207	11523768	11543207	0	0	0	0	0	0	0	0	0	0	0	0	0	0	0	0	0	0	0	0	0	0	1	0	0	0	0	0	0	0	0	0	0	3	0	0	0	0	0	0
chr10:11523768-11551674	11523768	11551674	0	0	0	0	0	0	0	0	0	0	0	0	0	0	0	0	0	0	0	0	1	0	0	0	0	0	0	0	0	0	0	0	2	0	0	0	0	0	0	0
chr10:11523768-11560573	11523768	11560573	0	0	0	0	0	0	0	0	0	0	0	0	0	0	0	0	0	0	0	0	0	0	0	0	0	0	0	0	0	0	0	0	0	0	7	0	0	0	0	0
chr10:11523768-11569566	11523768	11569566	1	0	0	1	0	1	0	0	1	0	0	0	0	0	0	0	0	0	0	1	0	0	0	0	0	1	0	0	0	0	0	0	0	2	0	1	0	0	0	0
chr10:11523768-11639716	11523768	11639716	0	0	0	0	0	0	0	0	0	0	0	0	0	0	0	0	1	0	0	0	0	0	0	0	0	1	0	0	0	0	0	0	0	0	0	0	0	3	0	0
chr10:11531100-11569566	11531100	11569566	0	0	0	0	0	0	0	0	0	0	0	0	0	0	0	0	0	0	0	0	0	0	0	0	0	0	0	0	0	0	0	0	0	0	0	2	0	0	0	0
chr10:11531100-11639716	11531100	11639716	0	0	0	0	0	0	0	0	0	0	0	0	0	0	0	0	0	0	0	0	0	0	0	0	0	0	0	0	2	0	0	0	0	2	0	0	0	0	0	0
chr10:11551593-11569566	11551593	11569566	1	0	0	0	0	0	0	0	0	0	0	0	0	0	0	0	0	0	0	0	0	0	0	0	0	0	0	2	0	0	0	0	0	0	0	1	0	0	0	0
chr10:115618286-115639454	115618286	115639454	0	0	0	0	0	0	0	0	0	0	0	0	0	0	0	0	0	0	0	0	0	0	0	0	0	0	0	0	0	0	0	2	0	0	0	0	0	0	0	0
chr10:115618286-115644139	115618286	115644139	0	0	0	0	0	0	0	0	0	0	0	0	0	0	0	0	0	0	0	0	0	0	0	0	0	0	0	0	0	0	0	0	0	0	0	2	0	0	0	0
chr10:115636279-115639454	115636279	115639454	0	0	0	0	0	0	0	0	0	0	0	0	0	0	0	0	1	0	0	0	0	0	0	0	0	0	0	0	0	0	0	0	0	0	2	0	0	0	0	0
chr10:115636279-115644139	115636279	115644139	0	1	0	0	0	0	0	2	0	1	0	1	0	0	0	2	0	1	0	1	0	2	0	0	1	4	0	1	3	8	0	0	4	12	5	19	5	0	3	0
chr10:115636279-115664795	115636279	115664795	0	0	0	0	0	0	0	0	0	0	0	0	0	0	0	0	0	0	0	1	0	0	0	0	0	0	0	0	0	0	0	0	0	0	0	2	0	0	0	0
chr10:115663285-115664795	115663285	115664795	0	0	0	0	0	0	0	0	0	0	0	0	0	0	0	0	0	0	0	0	0	0	0	0	0	0	0	0	0	0	0	0	0	0	0	0	3	0	0	0
chr10:115887219-115896005	115887219	115896005	0	0	0	0	0	0	0	0	0	0	0	0	0	0	0	0	0	0	0	0	0	0	0	0	0	0	0	0	0	1	0	0	0	0	2	0	0	0	0	0
chr10:115891687-115896005	115891687	115896005	0	0	0	0	0	0	0	0	0	0	0	0	0	0	0	0	0	0	0	0	0	0	0	0	0	0	0	0	0	0	0	0	9	0	0	0	0	0	0	0
chr10:115894671-115905520	115894671	115905520	0	0	0	0	0	0	0	0	0	0	0	0	0	0	0	0	0	0	0	0	0	0	0	0	0	0	0	0	0	0	8	0	0	3	0	0	0	0	0	0
chr10:115904255-115905520	115904255	115905520	0	0	0	0	0	0	0	0	0	0	0	0	0	0	0	0	0	0	0	0	0	0	0	0	0	0	0	0	0	0	0	0	0	0	0	2	0	0	0	0
chr10:115910850-115917439	115910850	115917439	0	0	0	0	0	0	0	0	0	0	0	0	0	0	0	0	0	0	0	0	0	1	0	0	0	0	0	0	0	0	0	0	0	5	0	0	0	0	0	0
chr10:115922395-115923088	115922395	115923088	0	0	0	0	0	0	0	0	0	0	0	0	0	0	0	0	0	1	0	0	0	0	0	0	0	0	0	0	0	0	8	0	1	0	0	0	0	0	0	0
chr10:116197602-116211430	116197602	116211430	0	0	0	0	0	0	0	0	0	0	0	0	0	0	0	0	0	0	0	0	0	0	0	0	0	0	0	0	0	0	0	0	2	0	0	0	0	0	0	0
chr10:116207638-116233715	116207638	116233715	0	0	0	0	0	0	0	0	0	0	0	0	0	0	0	0	0	0	0	0	0	0	0	0	0	0	0	0	0	0	0	0	4	0	0	0	0	0	0	0
chr10:116225456-116233715	116225456	116233715	0	0	0	0	0	0	0	0	0	0	0	0	0	0	0	0	0	0	0	0	0	0	0	0	0	0	0	0	0	0	0	0	0	0	0	2	0	0	0	0
chr10:116227939-116233715	116227939	116233715	0	0	0	0	0	0	0	0	0	0	0	0	0	0	0	0	0	0	0	0	0	0	0	0	0	0	0	0	0	0	0	0	0	0	0	0	3	0	0	0
chr10:116247716-116251637	116247716	116251637	0	0	0	0	0	0	0	0	0	0	0	0	0	0	0	0	0	0	0	0	0	0	0	0	0	0	0	0	0	0	0	0	0	6	0	0	0	0	0	0
chr10:116304763-116307535	116304763	116307535	0	0	0	0	0	0	0	0	0	0	0	0	0	0	0	0	0	0	0	0	0	0	0	0	1	0	0	0	0	0	0	0	0	0	0	3	0	0	0	0
chr10:116304763-116361720	116304763	116361720	0	0	0	0	0	0	0	0	0	0	0	0	0	0	0	0	0	0	0	0	0	0	0	0	0	0	0	0	3	0	0	0	0	0	0	2	0	0	0	0
chr10:116331055-116361720	116331055	116361720	0	0	0	0	0	0	0	0	0	0	0	0	0	0	0	0	0	0	0	0	0	0	0	2	0	2	0	0	0	0	0	0	0	4	0	0	0	0	0	0
chr10:116590610-116608496	116590610	116608496	1	0	0	0	0	0	0	0	0	0	0	0	0	0	0	1	2	0	0	0	0	2	0	0	2	1	0	0	0	0	0	0	2	0	4	0	0	0	0	0
chr10:116592991-116608496	116592991	116608496	0	0	0	0	0	0	0	0	0	0	0	0	0	0	0	0	0	0	0	0	0	0	0	0	0	0	0	0	0	0	0	0	0	0	4	0	0	0	0	0
chr10:1170157-1170964	1170157	1170964	0	0	0	0	0	0	0	0	2	0	0	0	0	0	0	0	0	0	0	0	0	0	1	0	0	0	0	0	0	0	0	0	0	0	0	0	0	0	0	0
chr10:118711419-118728223	118711419	118728223	0	0	0	0	0	0	0	0	0	0	0	0	0	0	0	0	0	0	0	0	0	0	0	0	0	0	0	0	3	0	0	0	0	0	0	0	0	0	0	0
chr10:11971863-11994248	11971863	11994248	0	0	0	0	0	1	0	0	0	0	1	0	0	1	0	2	0	1	1	0	0	1	0	1	0	1	0	4	0	0	0	0	4	0	0	0	7	0	0	0
chr10:11971863-12006124	11971863	12006124	0	0	0	0	0	0	0	0	0	0	0	0	0	0	0	0	0	0	0	0	0	0	0	0	0	0	0	0	0	0	0	0	0	0	3	0	0	0	0	0
chr10:11971863-12056183	11971863	12056183	0	0	0	0	0	0	0	0	0	0	0	0	0	0	0	0	0	0	0	0	0	0	0	0	0	0	0	0	0	0	0	0	0	1	0	2	0	0	0	0
chr10:11973639-11994248	11973639	11994248	0	0	0	0	0	0	0	0	0	0	0	0	0	0	0	0	0	0	0	0	0	0	0	0	0	0	0	0	0	0	0	0	4	0	0	0	0	0	0	0
chr10:11978543-11985167	11978543	11985167	0	0	0	0	0	0	0	0	0	0	0	0	0	0	0	0	0	0	0	0	0	0	0	0	0	0	0	0	0	0	0	0	0	3	0	0	0	0	0	0
chr10:11978543-11994248	11978543	11994248	0	0	0	0	1	0	0	0	0	1	0	0	0	0	0	1	0	0	0	0	1	0	0	0	0	0	0	0	0	0	0	0	0	0	5	0	0	0	0	0
chr10:11978543-12009453	11978543	12009453	0	0	0	0	0	0	0	0	0	0	0	0	0	0	0	0	0	0	0	0	0	0	0	0	0	0	0	0	0	0	0	0	0	0	0	0	4	0	0	0
chr10:11984663-11990507	11984663	11990507	0	0	0	1	0	0	0	0	0	0	0	0	0	0	0	0	0	0	0	0	0	0	0	0	0	0	0	0	0	0	0	0	0	0	0	3	0	0	0	0
chr10:11984663-11994248	11984663	11994248	0	0	0	0	0	0	0	0	0	0	0	0	0	0	1	0	0	0	0	0	0	0	0	0	0	1	0	0	0	0	0	0	0	2	7	0	0	0	0	0
chr10:11984663-12009453	11984663	12009453	0	0	0	0	0	0	0	0	0	0	0	0	0	0	0	0	0	0	0	0	0	0	0	0	0	0	0	0	0	0	0	2	0	0	0	0	0	0	0	0
chr10:11990367-11994248	11990367	11994248	0	0	0	0	0	0	0	0	0	0	0	0	0	0	0	0	0	1	0	0	0	0	0	0	0	0	0	0	1	5	0	0	8	1	0	0	0	0	0	0
chr10:11990367-11997506	11990367	11997506	0	0	0	0	0	0	0	0	0	0	0	0	0	0	0	0	0	0	0	0	0	0	0	0	0	0	0	0	0	0	0	0	0	0	0	0	2	0	0	0
chr10:11990367-11998522	11990367	11998522	0	0	0	0	0	0	0	0	0	0	0	0	0	0	0	0	0	0	0	0	0	0	0	0	0	0	0	0	0	0	0	0	0	3	0	0	0	0	0	0
chr10:11990367-12001355	11990367	12001355	0	0	0	0	0	0	0	0	0	0	0	0	0	0	0	0	0	0	0	0	0	0	0	0	0	0	0	0	0	3	0	0	0	0	0	0	0	0	0	0
chr10:11994064-12001355	11994064	12001355	0	0	0	0	0	0	0	0	0	0	0	0	0	0	0	0	0	0	0	0	0	0	0	0	0	0	0	0	0	0	0	0	2	0	0	0	0	0	0	0
chr10:11994064-12056183	11994064	12056183	0	0	0	0	0	0	0	0	0	1	0	0	0	0	0	0	0	0	0	0	0	0	0	0	0	0	0	0	0	0	0	0	0	0	2	0	0	0	0	0
chr10:11997230-12001355	11997230	12001355	0	0	0	0	0	0	0	0	0	0	0	0	0	0	0	0	0	0	0	0	0	0	0	0	0	0	0	0	0	0	0	0	0	2	0	0	0	0	0	0
chr10:11997230-12009453	11997230	12009453	0	0	0	0	0	0	0	0	0	0	0	0	0	0	0	0	0	0	0	0	0	0	0	0	0	2	0	0	0	0	0	0	0	0	0	0	0	0	0	0
chr10:12006007-12056183	12006007	12056183	0	0	0	0	0	0	0	0	0	0	0	0	0	0	0	0	0	0	0	0	0	0	0	0	0	0	0	0	0	0	0	0	3	0	2	0	0	0	0	0
chr10:12009339-12056183	12009339	12056183	0	0	1	0	0	0	0	0	0	0	2	0	0	1	1	0	1	0	0	0	1	1	0	0	0	0	0	0	0	4	0	0	1	0	0	0	0	0	0	0
chr10:12021055-12046726	12021055	12046726	0	0	0	0	0	0	0	0	0	0	0	0	0	0	0	0	1	0	0	0	0	0	0	0	0	0	0	0	0	0	0	0	0	4	0	0	0	0	0	0
chr10:12021055-12056183	24042110	24112366	0	0	0	0	0	0	0	0	0	0	0	0	0	0	1	0	2	0	0	0	1	1	1	0	1	0	0	1	1	0	2	3	0	10	5	0	0	0	0	0
chr10:12039670-12046726	12039670	12046726	0	1	0	1	0	0	0	0	0	1	0	0	0	0	1	0	0	0	0	0	0	0	1	0	0	2	2	1	1	8	10	9	0	14	4	0	2	0	0	0
chr10:12039670-12056183	24079340	24112366	4	3	2	0	1	1	1	0	1	3	1	2	0	3	0	1	2	1	2	2	5	5	2	0	4	11	2	4	5	19	23	14	10	32	13	5	11	4	9	0
chr10:12039670-12077440	12039670	12077440	0	0	0	0	0	0	0	0	0	1	0	0	0	0	0	0	0	0	0	0	0	0	0	0	0	0	0	0	1	0	0	0	6	0	6	0	0	0	0	0
chr10:12041904-12046726	12041904	12046726	0	0	0	0	0	0	0	0	0	0	0	0	0	0	0	0	0	0	0	0	0	0	0	0	0	0	0	0	0	0	0	0	0	0	0	0	0	0	2	0
chr10:12043674-12056183	12043674	12056183	0	0	0	0	0	0	0	0	0	0	0	0	0	0	0	0	0	0	0	0	0	0	0	0	0	0	0	0	0	0	13	4	0	0	0	0	0	0	0	0
chr10:120445494-120454742	120445494	120454742	0	0	0	0	0	0	0	0	0	0	0	0	0	0	0	0	0	0	0	0	0	0	0	0	0	0	0	0	0	0	0	0	0	0	0	2	0	0	0	0
chr10:120445494-120467099	120445494	120467099	0	0	0	0	0	0	0	0	0	0	0	0	0	0	0	0	0	0	0	0	0	1	0	0	0	0	1	0	0	0	0	0	0	1	0	0	5	0	0	0
chr10:120445494-120489922	120445494	120489922	0	1	1	0	0	0	0	0	0	0	0	0	0	0	0	1	0	0	0	0	0	0	1	0	0	1	0	1	1	0	0	0	7	0	0	0	0	0	0	0
chr10:120446109-120454742	120446109	120454742	0	0	0	0	0	0	0	0	0	0	0	0	0	0	0	0	0	0	0	0	0	0	0	0	0	0	0	0	2	0	0	0	0	0	0	0	0	0	0	0
chr10:120450776-120489922	120450776	120489922	0	0	0	0	0	0	0	0	0	0	0	0	0	0	0	0	0	0	0	0	0	0	0	0	0	0	0	0	0	0	0	0	2	0	0	0	0	0	0	0
chr10:120460817-120489922	120460817	120489922	0	0	0	0	0	0	0	0	0	0	0	0	1	0	0	0	0	0	0	0	0	0	0	0	0	0	0	0	0	0	0	0	0	3	3	0	0	0	0	0
chr10:120467003-120489922	120467003	120489922	0	0	0	0	0	0	0	0	0	0	0	0	0	0	0	0	0	0	0	0	0	0	0	0	0	0	0	0	0	0	0	0	0	5	0	0	0	0	0	0
chr10:120488806-120489922	120488806	120489922	1	0	0	1	0	0	0	0	0	0	0	0	0	0	0	0	0	0	0	0	0	0	0	0	0	0	0	0	0	0	0	0	0	0	4	0	0	0	3	0
chr10:12056022-12071523	12056022	12071523	0	0	0	0	0	0	0	0	0	0	0	0	0	0	0	0	0	0	0	0	0	0	0	0	0	0	0	1	0	3	7	0	0	0	0	0	0	0	0	0
chr10:12056022-12077440	12056022	12077440	0	0	0	0	0	0	0	0	0	0	0	0	0	0	0	0	0	0	0	0	0	0	0	0	0	0	0	0	0	2	0	0	0	0	0	0	5	0	0	0
chr10:12070743-12071523	12070743	12071523	0	0	0	0	0	0	0	0	0	0	0	0	0	2	0	0	1	0	0	0	0	0	0	0	0	0	0	0	0	0	9	0	0	0	9	0	5	0	0	0
chr10:12070743-12077440	12070743	12077440	0	0	0	0	0	0	0	0	0	0	0	0	0	0	0	0	0	0	1	0	0	0	0	0	0	0	0	0	1	3	0	0	0	0	0	1	0	0	0	0
chr10:12077057-12077440	12077057	12077440	0	0	0	0	0	0	0	0	0	0	0	0	0	0	0	0	0	0	0	0	0	0	0	0	0	0	0	0	0	0	0	0	0	1	3	0	0	0	0	0
chr10:120797749-120797951	241595498	241595902	0	0	0	0	0	0	0	0	0	0	0	0	0	0	0	0	0	1	0	0	0	0	0	1	0	1	0	0	0	0	0	0	6	0	2	4	0	0	0	0
chr10:120797749-120802284	120797749	120802284	0	0	0	0	0	0	0	0	0	0	0	0	0	0	0	0	1	0	0	0	0	0	0	0	0	0	1	0	0	0	0	0	0	0	0	0	0	6	0	0
chr10:120809312-120810833	120809312	120810833	0	0	0	0	0	0	0	0	0	0	0	0	0	0	0	0	0	0	0	0	0	0	0	0	0	0	0	0	0	0	0	0	4	0	0	0	0	0	0	0
chr10:120809312-120833449	120809312	120833449	0	0	0	0	0	0	0	0	0	0	0	0	0	0	0	0	0	0	0	0	0	0	0	0	0	0	0	0	1	0	0	0	0	0	1	3	0	0	0	0
chr10:120810710-120825082	120810710	120825082	0	0	0	0	0	0	0	0	0	0	0	0	0	0	0	0	0	0	0	0	0	0	0	0	0	0	0	0	0	0	0	0	0	0	2	0	0	0	0	0
chr10:120810710-120830597	120810710	120830597	0	0	0	0	0	0	0	0	0	0	0	0	0	0	0	0	0	0	0	0	0	0	0	0	0	0	0	0	0	0	0	0	0	0	6	0	0	0	0	0
chr10:120810710-120833449	120810710	120833449	0	0	0	0	0	0	0	0	0	0	0	0	0	0	0	0	0	0	0	0	0	0	0	0	0	1	0	0	0	0	0	0	0	0	2	0	0	0	0	0
chr10:120816251-120818909	120816251	120818909	0	0	0	0	0	0	0	0	0	0	0	0	0	0	0	0	0	0	0	0	0	0	0	0	0	0	0	0	0	0	0	0	0	0	2	0	0	0	0	0
chr10:120816251-120819230	241632502	241638460	0	0	0	0	0	0	0	0	0	0	0	0	0	0	0	0	0	0	0	0	0	0	0	0	0	0	0	0	0	0	0	0	3	0	0	0	0	0	0	0
chr10:120816251-120833449	120816251	120833449	0	0	0	0	0	0	0	0	0	0	0	0	0	0	0	0	0	0	0	0	0	0	0	0	0	0	0	0	0	2	0	0	0	0	0	0	0	0	0	0
chr10:120820257-120829166	120820257	120829166	0	0	0	0	0	0	0	0	0	0	0	0	0	0	0	0	0	0	0	0	0	0	0	0	0	0	0	0	0	0	0	0	0	0	0	2	0	0	0	0
chr10:120824910-120833449	120824910	120833449	0	1	0	1	0	0	0	0	0	1	0	0	0	0	0	2	0	0	0	0	0	0	1	0	1	0	0	0	0	0	0	0	0	2	0	1	1	0	0	0
chr10:120828957-120830597	120828957	120830597	0	0	0	0	0	0	0	0	0	0	0	0	0	0	0	0	0	0	0	0	0	0	0	0	0	1	0	0	0	1	0	0	6	0	0	0	0	0	0	0
chr10:120828957-120833449	120828957	120833449	0	0	0	0	0	0	0	0	0	0	0	0	0	0	0	0	0	0	0	0	0	0	0	0	0	0	0	1	3	0	0	4	0	4	6	3	0	0	1	0
chr10:120832401-120833449	120832401	120833449	0	0	0	0	1	0	0	0	1	0	0	0	0	0	0	1	0	0	0	0	0	0	0	0	0	1	0	0	0	0	0	0	0	4	0	2	5	0	0	0
chr10:12123470-12133683	12123470	12133683	2	0	3	1	0	0	0	0	0	2	0	0	0	0	0	1	1	0	0	0	0	0	0	0	0	0	0	0	0	0	0	0	0	0	0	0	0	0	0	0
chr10:12123470-12143180	12123470	12143180	0	0	1	1	1	0	0	0	0	0	0	0	0	0	0	0	0	2	1	0	0	0	0	0	0	0	0	0	0	0	0	0	0	0	0	0	0	0	0	0
chr10:12123470-12162266	12123470	12162266	0	0	0	2	0	1	0	0	0	0	0	1	0	0	0	2	0	0	0	0	0	1	0	0	0	0	0	0	0	0	0	0	0	1	0	0	0	0	0	0
chr10:121336122-121339522	121336122	121339522	0	0	0	0	0	0	0	0	0	0	0	0	0	0	0	0	0	0	0	0	0	0	0	0	0	0	0	0	0	0	0	0	4	0	0	0	0	0	0	0
chr10:121336122-121341521	121336122	121341521	0	0	0	0	0	0	0	0	0	0	0	0	0	0	0	0	0	0	0	0	0	0	0	0	0	0	0	0	0	0	0	0	0	0	2	0	0	0	0	0
chr10:121336591-121339522	121336591	121339522	0	0	0	0	0	0	0	0	0	0	0	0	0	0	0	0	0	0	0	0	0	0	0	0	0	0	0	0	0	0	0	0	0	0	0	0	4	0	0	0
chr10:121336591-121347760	121336591	121347760	0	0	0	0	0	0	0	0	0	0	0	0	0	0	0	0	0	0	0	0	0	0	0	0	0	0	0	0	0	5	0	0	0	0	0	0	0	0	0	0
chr10:121338237-121347760	121338237	121347760	0	0	0	0	0	0	0	0	0	0	0	0	0	1	1	0	0	0	1	0	0	0	0	0	0	0	0	0	2	0	0	0	0	0	0	0	0	0	0	0
chr10:121339446-121347760	121339446	121347760	0	0	0	0	0	0	0	0	0	0	0	0	0	0	0	0	0	0	0	0	1	0	0	0	0	1	0	0	0	0	0	0	0	5	3	2	0	0	0	0
chr10:12136071-12162266	12136071	12162266	0	0	0	0	0	0	0	0	0	0	0	0	0	0	1	0	0	0	0	1	0	0	0	0	0	0	0	0	0	0	0	0	0	2	0	0	0	0	0	0
chr10:121657938-121658471	121657938	121658471	0	0	0	0	0	0	0	0	0	0	0	0	0	0	0	0	0	0	0	0	0	0	0	0	0	0	0	2	0	0	0	0	0	0	2	1	5	0	0	0
chr10:121657938-121662521	121657938	121662521	0	0	0	0	0	0	0	0	0	0	0	0	0	0	0	0	0	0	0	0	0	0	0	0	0	0	0	0	0	0	0	0	0	0	0	0	0	0	3	0
chr10:121657938-121693299	121657938	121693299	0	0	0	0	0	0	0	0	0	0	0	0	0	0	0	0	0	0	0	0	0	0	0	0	0	0	0	0	0	0	0	3	0	0	0	0	0	0	0	0
chr10:121663595-121668642	121663595	121668642	1	0	0	0	0	0	0	0	0	0	0	0	0	0	0	0	0	0	0	0	0	0	0	0	3	0	0	0	0	0	0	0	0	0	0	0	0	0	0	0
chr10:121685547-121691830	121685547	121691830	0	0	0	0	0	0	0	0	0	0	0	0	0	0	0	0	0	0	0	0	0	0	0	0	0	0	0	0	0	0	0	0	6	0	0	0	0	0	0	0
chr10:121685547-121693299	121685547	121693299	0	0	1	1	0	0	0	0	0	0	0	0	0	0	1	0	0	0	0	0	0	0	0	0	0	0	0	0	1	0	0	0	0	0	4	0	0	0	3	0
chr10:121689118-121693299	121689118	121693299	0	0	0	0	0	0	0	0	0	0	1	0	0	0	0	0	0	0	0	0	0	0	0	0	0	0	0	0	0	0	0	0	0	0	14	0	0	0	0	0
chr10:122273422-122280607	122273422	122280607	1	1	0	0	0	1	1	3	0	0	1	1	0	1	0	1	0	0	0	0	0	0	0	0	0	0	0	0	0	0	0	0	0	0	0	0	0	0	0	0
chr10:122637864-122648696	122637864	122648696	0	0	0	0	0	0	0	0	0	0	0	0	0	0	0	0	0	0	0	0	0	0	0	0	0	0	0	0	0	0	0	0	0	0	2	0	0	0	0	0
chr10:122640337-122649521	122640337	122649521	0	0	0	0	0	0	0	0	0	0	1	0	0	0	0	0	0	0	0	0	0	0	0	0	0	0	0	0	0	0	0	0	0	0	0	1	5	0	0	0
chr10:122643291-122650399	122643291	122650399	0	0	0	0	0	0	0	0	0	0	0	0	0	0	0	0	0	0	0	0	0	0	0	0	0	0	0	0	0	0	0	0	0	3	0	0	0	0	0	0
chr10:123549683-123629553	123549683	123629553	0	0	0	0	0	0	0	0	0	0	0	0	0	0	0	0	0	0	0	0	0	0	0	0	0	0	0	0	0	0	0	0	0	0	3	0	0	0	0	0
chr10:123549683-123683844	123549683	123683844	0	1	0	0	0	0	0	0	0	0	0	0	0	0	0	0	0	0	0	0	0	0	0	0	0	0	0	1	0	0	0	0	0	2	0	0	0	6	0	0
chr10:123596232-123683844	123596232	123683844	0	0	0	0	0	0	0	0	0	0	0	0	0	0	0	0	0	0	0	0	0	0	0	2	0	0	0	0	0	1	0	0	0	0	0	0	0	0	0	0
chr10:123629520-123681926	123629520	123681926	0	0	0	0	0	0	0	0	0	0	0	0	0	0	0	0	0	0	0	0	0	0	0	0	0	0	0	0	0	0	0	0	0	0	0	2	0	0	0	0
chr10:123629520-123683844	123629520	123683844	0	0	0	0	0	0	0	0	0	0	0	0	0	0	0	0	0	0	1	0	0	0	0	0	1	0	1	1	0	0	0	0	7	1	0	1	1	0	0	0
chr10:123658355-123683844	123658355	123683844	0	0	0	0	0	0	0	0	0	0	0	0	0	0	0	0	0	0	0	0	0	0	1	0	0	0	0	0	0	0	0	0	0	0	0	0	4	0	0	0
chr10:123661905-123683844	123661905	123683844	0	0	0	0	0	0	1	0	0	0	0	0	0	0	0	0	0	0	0	0	0	0	0	0	0	0	0	0	0	0	0	0	0	0	0	3	0	0	0	0
chr10:124697220-124712548	124697220	124712548	0	0	0	0	0	0	0	0	0	0	0	0	0	0	0	0	0	0	0	0	0	0	0	0	0	0	0	0	0	0	0	0	0	0	4	4	0	0	0	0
chr10:124755509-124766692	124755509	124766692	0	0	0	0	0	0	0	0	0	0	0	0	0	0	0	0	0	0	0	0	0	0	1	0	0	0	0	0	0	0	0	0	0	5	0	0	0	0	0	0
chr10:124915173-124922344	124915173	124922344	0	0	0	0	0	0	0	0	0	0	0	0	0	0	0	0	0	0	0	0	0	0	0	0	0	0	0	0	0	0	0	0	2	0	0	0	0	0	0	0
chr10:124921751-124922344	124921751	124922344	0	0	0	0	0	0	0	0	0	0	0	0	0	0	0	0	0	0	0	0	0	0	0	0	0	0	0	0	0	0	0	0	0	5	0	0	0	0	0	0
chr10:12595223-12708809	12595223	12708809	0	0	0	0	0	0	0	0	0	0	0	0	0	0	0	0	0	0	0	0	0	0	0	0	0	0	0	0	0	0	0	0	5	0	0	0	0	0	0	0
chr10:126089408-126090408	126089408	126090408	0	0	0	0	0	0	1	0	0	0	0	1	0	1	0	1	1	0	0	0	0	0	0	0	0	0	1	0	0	3	0	0	0	10	9	2	4	0	0	0
chr10:126089408-126092489	126089408	126092489	0	0	0	0	0	0	0	0	0	0	1	0	0	0	0	0	0	0	0	0	0	0	0	0	0	0	0	0	0	0	0	0	0	0	2	0	0	0	0	0
chr10:126089408-126097534	126089408	126097534	0	0	0	0	0	0	0	0	0	0	0	0	0	0	0	0	0	0	0	0	0	0	0	0	0	0	0	0	0	0	0	0	0	4	0	0	0	0	0	0
chr10:126089408-126100769	126089408	126100769	0	0	0	0	0	0	0	0	0	0	0	0	0	0	0	0	0	0	0	0	0	0	0	0	0	0	0	0	0	0	12	3	0	0	0	0	0	0	0	0
chr10:126091495-126097534	126091495	126097534	0	0	0	0	0	0	0	0	0	0	0	0	0	1	0	0	0	0	0	0	0	0	0	0	0	0	0	0	0	2	0	0	0	0	2	6	3	2	0	0
chr10:126097110-126097534	126097110	126097534	0	0	0	0	0	0	0	0	0	0	0	0	0	0	0	0	2	0	0	1	0	0	0	1	8	0	0	0	0	8	0	0	10	4	9	7	1	0	18	0
chr10:126097110-126100769	126097110	126100769	0	0	0	0	1	0	1	2	0	2	0	0	3	0	0	0	0	1	1	1	1	1	0	0	4	7	0	2	3	0	9	1	4	8	10	7	0	0	1	0
chr10:126370175-126370948	126370175	126370948	1	0	2	0	0	1	1	5	2	1	4	1	1	0	1	2	2	2	5	4	2	3	2	1	1	2	3	3	5	0	0	0	0	6	8	0	0	0	0	1
chr10:126370175-126384781	126370175	126384781	1	0	0	0	1	0	0	0	1	0	1	0	0	0	0	0	1	1	1	1	0	0	1	2	2	0	0	3	0	0	0	0	0	2	0	3	0	0	0	0
chr10:126370175-126395456	126370175	126395456	0	0	1	0	0	1	0	0	0	0	0	0	0	0	0	0	0	0	0	1	0	0	0	0	0	0	4	4	3	0	0	0	0	0	2	6	0	0	1	0
chr10:126384726-126395456	126384726	126395456	0	0	0	0	0	0	0	0	0	0	0	0	0	2	0	0	0	0	0	0	0	0	0	0	0	0	0	1	0	0	0	0	0	0	0	1	0	0	0	0
chr10:126395204-126395456	126395204	126395456	0	0	0	0	0	0	0	1	0	1	0	1	0	0	0	0	1	0	0	2	0	0	0	0	0	0	0	0	0	0	0	0	0	0	0	1	0	0	0	0
chr10:126448954-126463351	126448954	126463351	0	0	0	0	0	0	0	0	0	0	0	0	0	0	0	0	0	0	0	0	0	0	0	0	0	0	1	0	0	0	0	0	0	0	0	0	4	0	0	0
chr10:126495399-126515354	126495399	126515354	0	0	0	0	0	0	0	0	0	0	0	0	0	0	0	0	0	0	0	0	0	0	0	0	0	0	0	0	0	0	0	0	0	0	0	0	0	0	4	0
chr10:126517324-126520032	126517324	126520032	0	0	0	0	0	0	0	0	0	0	0	0	0	0	0	0	2	0	0	0	0	0	0	0	0	0	0	0	0	0	0	0	0	0	0	1	0	0	0	0
chr10:126631025-126631876	253262050	253263752	4	5	3	1	6	1	4	2	3	2	2	3	1	5	2	1	4	2	0	2	3	3	3	4	12	10	2	6	13	15	2	10	40	50	39	26	19	0	14	5
chr10:126631025-126655350	126631025	126655350	1	0	0	1	0	0	0	1	0	0	0	0	0	0	0	0	0	0	0	0	0	0	1	0	0	0	1	1	0	0	0	0	0	2	2	0	0	0	0	0
chr10:126631025-126662285	126631025	126662285	0	0	0	0	0	0	0	0	0	0	0	0	0	0	0	0	0	0	0	0	0	0	0	0	0	0	0	0	0	0	0	0	0	3	0	2	0	0	0	0
chr10:126631025-126662967	126631025	126662967	0	0	0	0	0	0	0	2	0	0	0	1	0	0	0	0	0	0	0	0	0	0	0	0	1	2	0	0	1	3	0	0	0	0	1	0	0	0	0	0
chr10:126631025-126671873	126631025	126671873	0	0	0	0	0	0	0	0	1	0	0	0	0	0	0	0	0	0	0	0	0	0	0	0	0	0	0	0	0	0	0	0	0	0	0	2	0	0	0	0
chr10:126655162-126662285	126655162	126662285	0	0	0	0	0	0	0	0	0	0	0	0	0	0	0	0	0	0	0	0	0	0	0	0	0	0	0	0	0	0	0	0	0	0	2	0	0	0	0	0
chr10:126655162-126662967	126655162	126662967	0	0	0	0	0	0	0	0	0	0	0	0	0	0	0	0	0	0	0	0	0	0	0	0	0	0	0	0	5	0	0	0	0	0	0	1	0	0	0	0
chr10:126660533-126662967	126660533	126662967	0	0	0	0	0	0	0	0	0	0	0	0	0	0	0	0	0	0	0	0	0	0	0	0	0	0	0	0	3	0	0	0	0	0	0	0	0	0	0	0
chr10:126662213-126662967	126662213	126662967	0	0	0	0	0	0	0	0	0	0	0	0	0	0	0	0	0	0	0	0	1	0	0	0	0	0	0	0	0	0	0	0	0	3	0	0	0	0	0	0
chr10:126776759-126799662	126776759	126799662	0	0	0	0	0	0	0	0	0	0	0	0	0	0	0	0	0	0	0	0	0	0	0	0	0	0	0	0	5	0	0	0	0	0	0	0	0	0	0	0
chr10:12708734-12811798	12708734	12811798	0	0	0	0	0	0	0	0	0	0	0	0	0	0	0	0	0	0	0	0	0	0	0	0	0	0	0	0	2	0	0	0	0	0	0	0	0	0	0	0
chr10:12708734-12833232	12708734	12833232	0	0	0	0	0	0	0	0	0	0	0	0	0	0	0	0	0	0	0	0	0	0	0	0	0	0	0	0	1	0	0	0	0	0	0	0	4	0	0	0
chr10:127409772-127429770	127409772	127429770	0	0	0	0	0	0	0	0	0	0	0	0	0	0	0	0	0	0	0	0	0	0	0	0	0	0	0	0	0	0	0	0	0	0	0	0	3	0	0	0
chr10:127431626-127442414	127431626	127442414	0	0	0	0	0	0	0	0	0	0	0	0	0	0	0	0	0	0	0	0	0	0	0	0	0	0	0	0	0	0	0	0	0	4	0	0	0	0	0	0
chr10:127483448-127486714	127483448	127486714	0	0	0	0	0	0	0	0	0	0	0	0	0	0	0	1	0	0	0	0	0	0	0	0	0	1	0	0	0	0	0	6	0	0	0	0	0	0	0	0
chr10:127677119-127697119	127677119	127697119	0	0	0	0	0	0	0	0	0	0	0	0	0	0	0	0	0	0	0	0	1	0	0	0	0	0	0	0	0	0	0	0	2	0	0	0	0	0	0	0
chr10:12802946-12811798	12802946	12811798	0	0	0	0	0	0	0	0	0	0	0	0	0	0	0	0	0	0	0	0	0	0	0	0	0	0	0	0	0	0	0	0	0	2	0	0	0	0	0	0
chr10:12833156-12858327	12833156	12858327	0	0	0	0	0	0	0	0	0	0	0	0	0	0	0	0	0	0	0	0	0	0	0	0	0	0	0	2	0	0	0	0	0	0	0	0	0	0	0	0
chr10:128795011-128797699	128795011	128797699	2	0	0	0	0	0	0	0	0	0	0	0	0	0	0	0	0	0	0	0	0	0	0	0	0	0	0	0	0	0	0	0	0	0	0	0	0	0	0	0
chr10:13150137-13168039	13150137	13168039	0	0	0	0	0	0	0	0	0	0	0	0	0	0	0	0	0	0	0	0	0	0	0	0	0	0	0	0	0	0	0	0	0	0	0	2	0	0	0	0
chr10:13151111-13154635	13151111	13154635	0	0	0	0	0	0	0	0	0	0	0	0	0	0	0	0	0	0	0	0	0	0	0	0	0	0	0	0	0	0	0	0	0	0	0	2	0	0	0	0
chr10:13152179-13164487	13152179	13164487	0	0	0	0	0	0	0	0	0	0	0	0	0	0	0	0	0	0	0	0	0	0	0	0	0	1	0	0	1	2	15	0	0	3	0	2	0	0	7	0
chr10:13152273-13164487	13152273	13164487	0	0	0	0	0	0	0	0	0	0	0	0	0	0	0	0	0	0	0	0	0	0	0	0	1	0	0	1	0	0	0	1	2	9	5	7	0	0	0	0
chr10:13158266-13164487	13158266	13164487	0	0	0	0	0	0	0	0	0	0	0	0	0	0	0	0	0	0	0	0	0	0	0	0	2	0	0	0	0	0	0	0	0	0	0	1	0	0	0	0
chr10:131943474-131967754	131943474	131967754	0	0	0	0	0	0	0	0	0	0	0	0	0	0	0	0	0	0	0	0	0	0	0	0	0	2	0	0	0	0	0	0	0	0	0	0	0	0	0	0
chr10:131943474-131978585	131943474	131978585	0	0	0	0	0	0	0	0	0	0	0	0	0	0	0	0	0	0	0	0	0	0	0	0	0	1	0	0	2	0	0	0	0	2	0	0	0	0	0	0
chr10:131958258-131978585	131958258	131978585	0	0	0	0	0	0	0	0	0	0	0	0	0	0	0	0	0	0	0	0	0	0	0	0	0	0	0	0	2	0	0	0	0	0	0	0	0	0	0	0
chr10:131964770-131973353	131964770	131973353	0	0	0	0	0	0	0	0	0	0	0	0	0	0	0	0	0	0	0	0	0	0	0	0	0	0	0	0	0	2	0	0	0	0	0	0	0	0	0	0
chr10:131969847-131977684	131969847	131977684	0	0	0	0	0	0	0	0	0	0	0	1	0	0	0	0	0	0	0	0	1	0	0	0	0	0	0	1	0	0	14	0	0	0	0	1	0	0	0	0
chr10:131973130-131978585	131973130	131978585	0	0	0	0	0	0	0	0	0	0	0	0	0	0	0	0	0	0	0	0	0	0	0	0	0	0	0	0	0	0	0	0	0	0	0	0	0	4	0	0
chr10:13214375-13214765	26428750	26429530	1	1	0	3	0	1	0	1	2	1	0	0	4	0	0	3	1	0	1	2	0	0	2	1	0	0	0	0	1	0	0	0	2	2	3	6	0	0	2	0
chr10:13214375-13228280	13214375	13228280	0	0	0	0	0	0	0	0	1	0	1	0	0	0	0	1	1	0	0	0	0	0	0	0	0	0	0	0	0	0	0	0	0	1	2	0	0	0	0	0
chr10:13230880-13237269	13230880	13237269	0	0	0	0	1	0	0	0	0	0	0	0	0	0	0	0	0	0	0	0	0	0	0	0	0	0	0	0	2	0	0	0	0	0	0	0	0	0	0	0
chr10:13233298-13234568	13233298	13234568	0	0	0	0	1	0	0	0	0	0	1	0	0	1	0	0	0	0	0	0	0	0	2	0	0	0	0	0	0	3	0	0	0	4	0	6	0	0	0	0
chr10:13322975-13330541	13322975	13330541	0	0	0	0	0	0	0	0	0	0	0	0	0	0	0	0	0	0	0	0	0	0	0	0	0	0	0	0	0	0	0	0	0	0	0	0	0	0	0	2
chr10:13322975-13340245	13322975	13340245	0	0	0	0	0	0	0	0	0	0	0	0	0	0	0	0	0	0	0	0	0	0	0	0	0	0	0	0	0	2	0	0	0	0	0	0	0	0	0	0
chr10:13333830-13337606	13333830	13337606	1	0	0	0	0	0	0	0	0	0	0	0	0	0	0	0	0	0	0	0	0	0	0	0	0	0	0	0	0	0	0	3	0	0	0	0	0	0	0	0
chr10:133784141-133787447	133784141	133787447	0	0	0	0	0	0	0	0	0	0	0	0	0	0	0	0	0	0	0	0	0	0	0	0	0	0	0	0	0	0	0	0	0	0	0	2	0	0	0	0
chr10:135111455-135116484	135111455	135116484	0	0	0	0	0	0	0	0	0	0	0	0	0	0	0	0	0	0	0	0	0	0	0	0	0	0	1	0	0	0	0	0	0	2	0	0	0	0	0	0
chr10:135209216-135216277	135209216	135216277	4	0	0	0	0	0	0	0	0	0	0	0	3	0	0	0	0	0	0	0	0	0	0	0	0	0	0	0	0	0	0	0	0	0	0	0	0	0	0	0
chr10:135211938-135213157	135211938	135213157	1	0	1	1	0	0	0	1	0	0	0	1	0	1	0	0	0	0	0	0	0	0	0	0	0	0	0	3	0	0	0	0	0	0	0	0	0	0	5	0
chr10:13639457-13658553	13639457	13658553	0	0	0	0	0	0	0	0	0	0	0	0	0	0	0	0	0	0	0	0	0	0	0	0	0	0	0	0	0	0	0	2	5	0	0	0	0	0	0	0
chr10:13647630-13656086	13647630	13656086	0	0	0	0	0	0	0	0	0	0	0	0	0	0	0	0	0	0	0	0	0	0	0	0	0	0	0	0	0	0	0	0	4	0	0	0	0	0	0	0
chr10:13701322-13702553	13701322	13702553	0	0	0	0	0	0	0	0	0	0	0	0	0	0	0	0	0	1	0	1	1	0	0	0	0	0	0	0	0	0	0	0	0	5	4	0	0	0	0	0
chr10:13701322-13705509	27402644	27411018	0	0	0	0	0	0	0	0	0	0	1	0	0	0	0	0	0	0	0	1	4	1	0	0	1	2	2	1	5	0	0	3	1	7	0	6	5	2	3	0
chr10:13701322-13708325	13701322	13708325	0	0	0	0	0	0	0	0	0	0	0	0	0	0	0	0	0	0	0	0	0	0	0	0	0	0	0	0	1	0	0	0	0	0	7	0	3	0	0	0
chr10:13701322-13717044	13701322	13717044	0	0	0	0	0	0	0	0	0	0	0	0	0	0	0	0	0	0	0	0	0	1	3	0	0	0	0	0	0	0	0	0	0	0	0	0	3	0	0	0
chr10:13705452-13717044	13705452	13717044	0	0	0	0	0	0	0	0	0	0	0	0	0	0	0	0	2	0	0	0	0	2	1	0	3	0	1	0	1	1	0	0	0	3	0	0	0	0	0	0
chr10:14894368-14909908	14894368	14909908	0	0	0	0	0	0	0	0	0	0	0	0	0	0	0	0	0	0	0	0	0	0	0	0	0	0	0	0	0	3	0	0	0	0	0	0	0	6	0	0
chr10:14909081-14909908	14909081	14909908	0	0	0	0	0	0	0	0	0	0	0	0	0	0	0	0	0	0	0	0	0	0	0	0	0	0	0	1	0	0	0	0	0	2	0	0	0	0	0	0
chr10:14938844-14939516	14938844	14939516	0	1	0	0	0	0	0	0	0	0	0	0	0	0	0	0	2	0	0	0	0	0	0	1	0	0	0	0	0	0	0	0	0	0	5	0	0	2	2	0
chr10:14938844-14943261	14938844	14943261	0	0	0	0	0	0	0	0	0	0	0	0	0	0	0	0	0	0	0	0	0	0	0	0	0	0	0	0	0	0	0	0	0	3	0	0	0	0	0	0
chr10:14987103-14987564	14987103	14987564	0	0	0	0	0	0	0	0	0	0	0	0	0	0	0	0	0	0	0	0	0	0	0	0	0	0	2	0	0	0	0	0	0	0	0	0	0	0	0	0
chr10:15838098-15883598	15838098	15883598	0	0	0	0	0	0	1	0	0	0	0	0	0	0	0	0	0	0	0	0	0	0	0	0	0	0	0	0	2	0	0	0	0	0	0	0	0	0	0	0
chr10:15858833-15885271	15858833	15885271	0	0	0	0	0	0	0	0	0	0	0	0	0	0	0	1	0	0	1	0	0	0	0	0	0	0	0	0	0	0	0	0	4	0	0	0	0	0	0	0
chr10:15858833-15889942	15858833	15889942	0	0	0	1	0	0	0	0	0	0	0	0	0	0	1	0	1	2	0	0	0	0	0	2	0	0	0	0	0	0	0	2	3	1	0	3	0	0	0	0
chr10:15863654-15885271	15863654	15885271	0	1	0	1	0	0	0	1	0	0	1	0	0	0	0	0	1	0	0	1	0	0	0	0	0	1	0	0	0	0	0	0	2	0	2	5	0	0	0	0
chr10:15863654-15889942	15863654	15889942	1	0	0	1	0	0	0	1	1	0	1	0	0	0	0	0	0	0	0	0	0	0	0	2	0	0	0	0	1	2	0	0	0	0	0	1	3	0	0	0
chr10:15875628-15885271	15875628	15885271	0	0	0	0	1	0	0	0	0	0	0	0	0	0	0	0	1	0	0	0	0	0	0	1	0	1	0	1	0	0	0	0	0	3	0	5	0	0	0	0
chr10:15875628-15889942	31751256	31779884	1	0	0	5	1	0	0	1	2	2	1	2	0	5	3	5	4	2	1	4	0	0	1	3	2	3	2	8	3	11	0	2	7	11	9	11	0	0	2	0
chr10:16794537-16806509	16794537	16806509	0	0	0	0	0	0	0	0	0	0	0	0	0	0	0	0	0	0	0	0	0	0	0	0	2	0	0	0	0	3	0	0	0	1	0	0	0	0	0	0
chr10:16794537-16824083	16794537	16824083	2	0	0	0	0	0	1	0	0	0	1	0	0	0	0	0	0	1	1	0	2	0	0	1	5	0	1	0	3	0	0	0	0	8	7	6	9	0	0	0
chr10:17199439-17210916	17199439	17210916	0	1	0	0	0	0	0	0	0	0	0	0	0	0	0	0	0	0	0	0	0	0	0	0	0	0	0	0	0	0	0	0	0	0	0	3	0	0	0	0
chr10:17645558-17646046	17645558	17646046	0	0	0	0	0	0	0	0	0	0	0	0	0	0	0	0	0	0	1	0	0	0	0	0	0	0	0	0	0	6	0	0	0	1	7	1	0	0	0	0
chr10:17702462-17715077	17702462	17715077	0	0	0	0	0	0	0	0	0	0	0	0	0	0	0	0	0	0	0	0	0	0	0	0	0	0	0	0	0	0	0	0	0	0	0	2	0	0	0	0
chr10:17702462-17737240	17702462	17737240	0	0	0	0	0	0	0	0	0	0	0	0	0	0	0	0	0	0	0	0	0	0	1	0	0	0	0	0	0	0	0	0	4	0	0	0	0	0	0	0
chr10:17702462-17738868	17702462	17738868	0	0	0	0	0	0	0	0	0	0	0	0	0	0	0	0	0	0	0	0	0	0	0	0	0	0	0	0	0	0	0	0	0	0	0	0	0	0	5	0
chr10:17702462-17742278	17702462	17742278	0	0	0	0	0	0	0	0	0	0	0	0	0	0	0	0	0	0	0	0	0	0	0	1	0	0	0	0	0	0	0	0	0	0	0	4	0	0	0	0
chr10:17714973-17735311	17714973	17735311	0	0	0	0	0	0	0	0	0	0	0	0	0	0	0	0	0	0	0	0	0	0	0	0	0	0	0	0	0	0	0	0	0	0	2	0	0	0	0	0
chr10:17722898-17726926	17722898	17726926	0	0	0	0	0	0	0	0	0	0	0	0	0	0	0	0	0	0	0	0	0	0	0	0	0	0	0	0	0	0	0	0	0	0	0	5	0	0	6	0
chr10:17726673-17730172	17726673	17730172	0	0	0	0	0	0	0	0	0	0	0	0	0	0	0	0	0	0	0	0	0	0	0	0	0	0	0	0	2	0	0	0	0	0	0	0	0	0	0	0
chr10:17726673-17735311	17726673	17735311	0	0	0	0	0	0	0	0	0	0	0	0	0	0	0	0	0	0	2	0	0	0	0	0	0	1	0	0	0	0	0	0	0	0	0	0	0	0	0	0
chr10:17726673-17742278	17726673	17742278	0	0	0	0	0	0	0	0	0	0	0	0	0	0	0	0	0	0	0	0	0	0	0	0	0	0	0	0	0	0	0	6	4	0	6	5	0	0	0	0
chr10:17726673-17750950	17726673	17750950	0	0	0	0	0	0	0	0	0	0	0	0	0	0	0	0	0	0	0	0	0	0	0	0	0	0	0	0	1	0	0	0	3	0	0	0	0	0	0	0
chr10:17726830-17735311	17726830	17735311	0	0	0	0	0	0	0	0	0	0	0	0	0	0	0	0	0	0	0	0	0	0	0	0	0	0	0	1	0	0	0	0	0	0	5	0	0	0	0	0
chr10:17726830-17742278	17726830	17742278	0	0	0	0	0	0	0	0	0	0	0	0	0	1	0	0	0	0	0	0	0	0	0	0	0	0	0	0	0	0	0	0	0	5	0	0	0	0	0	0
chr10:17726926-17730000	17726926	17730000	0	0	0	0	0	0	0	0	0	0	0	0	0	0	0	0	0	0	0	0	0	0	0	0	0	0	0	0	0	5	0	0	0	0	0	1	0	0	0	0
chr10:17730025-17737240	35460050	35474480	0	0	0	0	0	0	0	0	0	0	0	0	0	0	0	0	0	0	0	0	0	0	0	0	0	1	0	0	0	0	0	3	0	0	6	0	0	0	0	0
chr10:17730025-17738868	17730025	17738868	0	0	0	0	0	0	0	0	0	0	0	0	0	0	1	0	0	1	1	0	1	0	0	0	0	0	0	0	0	4	0	4	0	9	3	1	14	0	3	3
chr10:17730025-17742278	17730025	17742278	0	0	0	0	0	0	0	0	0	0	0	0	0	0	0	0	0	0	0	0	0	0	0	0	0	0	0	0	0	2	0	0	0	1	0	0	0	0	0	0
chr10:17730025-17747740	17730025	17747740	0	0	0	0	0	0	0	0	0	0	0	0	0	0	0	0	0	0	0	0	0	0	0	0	0	2	0	1	0	0	0	0	0	0	0	0	0	0	0	0
chr10:17735220-17738868	17735220	17738868	0	0	0	0	0	0	0	0	0	0	0	0	0	0	0	0	0	0	0	0	0	0	0	0	0	0	1	1	0	0	0	0	7	0	0	0	0	0	0	0
chr10:17735220-17746517	17735220	17746517	0	0	0	0	0	0	0	0	0	0	0	0	0	0	0	0	0	0	0	0	0	0	0	0	1	0	0	0	0	0	0	0	4	0	0	0	0	0	0	0
chr10:17737047-17742278	17737047	17742278	0	0	0	0	0	0	0	0	0	0	0	0	0	0	0	0	0	0	0	0	0	0	0	0	0	0	0	0	0	3	0	0	0	4	4	0	0	0	0	0
chr10:17737047-17747740	17737047	17747740	0	0	0	0	0	0	0	0	0	0	0	0	0	0	0	0	0	0	0	0	0	0	0	0	0	0	0	0	0	2	0	0	0	0	0	0	0	0	0	0
chr10:17738773-17747023	17738773	17747023	0	0	0	0	0	0	0	0	0	0	0	0	0	0	0	0	0	0	0	0	0	0	0	0	0	0	0	0	0	0	0	0	0	3	0	0	0	0	0	0
chr10:17742189-17747023	17742189	17747023	0	0	0	0	0	0	0	0	0	0	0	0	0	0	0	0	0	0	0	0	0	0	0	0	0	0	0	0	0	0	0	0	0	0	0	2	0	0	0	0
chr10:17742189-17747740	17742189	17747740	0	0	0	0	0	0	0	0	0	0	0	0	0	0	0	0	0	0	0	0	0	0	2	0	0	0	0	0	0	3	0	4	0	1	7	1	0	0	0	0
chr10:17746429-17747740	17746429	17747740	0	0	1	0	0	1	1	2	0	1	3	2	1	2	2	2	5	3	3	1	6	10	5	4	4	10	1	3	8	5	4	11	12	16	16	8	16	0	4	0
chr10:17746429-17750950	17746429	17750950	0	0	0	0	0	0	0	0	0	0	0	0	0	0	0	0	0	0	0	0	0	0	0	0	0	0	0	0	0	0	0	0	0	0	4	0	0	0	0	0
chr10:18250509-18292287	18250509	18292287	0	0	0	0	0	0	0	0	0	0	0	0	0	0	0	0	0	0	0	0	0	0	0	0	4	0	0	0	0	5	0	0	0	0	0	0	0	0	0	0
chr10:18284584-18292287	18284584	18292287	0	0	0	0	0	0	0	0	0	0	0	0	0	0	0	0	0	0	0	0	0	0	0	0	0	0	0	0	0	0	0	0	0	0	5	0	0	0	0	0
chr10:18289595-18292287	18289595	18292287	0	0	0	0	0	0	0	0	0	0	0	0	0	0	0	0	0	0	0	0	0	0	0	0	0	0	0	0	0	0	0	0	0	0	0	2	0	0	0	0
chr10:18874877-18905222	18874877	18905222	0	0	0	0	0	0	0	0	0	0	0	0	0	0	0	0	0	0	0	0	0	0	2	0	0	1	0	0	1	1	0	0	4	1	0	3	0	0	0	13
chr10:18885136-18905222	37770272	37810444	0	0	0	0	0	0	0	0	0	0	0	1	0	0	0	0	0	0	0	0	0	0	0	0	0	0	0	0	1	0	0	0	0	0	5	0	0	0	0	11
chr10:18885136-18931484	18885136	18931484	0	0	0	0	0	0	0	0	0	0	0	0	0	0	0	0	0	0	0	0	0	0	0	0	0	2	0	0	0	0	0	0	2	0	0	0	0	0	0	0
chr10:18885136-18937574	18885136	18937574	0	0	0	0	0	0	0	1	0	0	0	0	0	0	0	0	0	0	0	0	0	0	0	0	0	0	0	0	0	0	0	0	0	0	0	2	0	0	0	0
chr10:18898773-18905222	18898773	18905222	0	1	0	0	0	0	0	0	0	0	0	1	0	0	0	0	0	0	0	1	0	0	0	0	0	0	0	0	0	0	0	0	0	0	1	3	5	0	0	0
chr10:18898773-18931484	18898773	18931484	0	0	0	0	0	1	0	0	0	0	0	0	0	0	0	0	0	0	0	0	0	0	0	0	0	0	0	0	0	3	0	0	0	4	0	1	0	0	0	0
chr10:21940601-21970305	21940601	21970305	0	0	0	0	0	0	0	0	0	0	0	0	0	0	0	0	0	0	0	0	0	0	0	0	0	0	0	0	0	0	0	0	0	6	0	0	0	0	0	0
chr10:21940601-22016857	21940601	22016857	0	0	0	0	0	0	0	0	0	0	0	0	0	0	0	0	0	0	0	0	0	0	0	0	0	0	0	0	0	0	0	0	0	3	0	0	0	0	0	0
chr10:21959377-22016857	21959377	22016857	0	0	0	0	0	0	0	0	0	0	0	0	0	0	0	0	0	0	0	0	0	0	0	0	0	0	0	0	0	0	0	0	0	0	0	2	0	0	0	0
chr10:21977467-21979833	21977467	21979833	0	0	0	0	0	0	0	0	0	0	0	0	0	0	0	0	0	0	0	0	0	0	0	0	0	0	0	0	0	0	0	0	0	0	4	0	0	0	0	0
chr10:22002700-22016857	22002700	22016857	0	0	0	0	0	0	0	0	0	0	0	0	1	0	0	0	0	1	0	0	0	0	0	0	0	0	0	0	0	0	0	0	0	2	1	5	0	0	0	0
chr10:22019828-22024164	22019828	22024164	1	0	0	0	0	0	0	0	0	0	0	0	0	0	0	0	0	0	0	0	0	0	1	0	0	0	0	0	0	0	0	0	0	2	0	0	0	0	0	0
chr10:22048098-22218070	22048098	22218070	0	0	0	0	0	0	0	0	0	0	0	0	0	0	0	0	0	0	0	0	0	0	0	0	0	0	0	0	4	0	0	0	0	0	0	0	0	0	0	0
chr10:22171210-22209892	22171210	22209892	1	1	0	0	0	1	0	1	0	0	0	0	1	0	0	0	0	0	0	0	1	0	0	1	1	1	0	0	0	0	5	0	0	0	0	2	0	0	0	0
chr10:22193450-22209892	22193450	22209892	0	0	1	1	0	1	1	0	0	0	0	0	0	0	1	0	1	0	0	1	0	0	0	0	0	0	0	0	0	0	0	0	0	0	0	0	4	0	0	0
chr10:225933-295028	225933	295028	0	0	1	0	1	0	0	0	0	0	0	0	1	0	0	0	0	0	0	0	0	0	1	0	0	0	0	0	4	0	0	4	2	7	0	0	0	0	0	0
chr10:22606812-22607947	22606812	22607947	0	0	1	0	0	0	0	0	0	0	0	0	0	0	0	0	0	0	0	0	0	0	0	0	0	0	0	0	0	0	0	0	4	0	0	0	0	0	0	0
chr10:22828899-22839701	22828899	22839701	0	0	0	0	0	0	0	0	0	0	0	0	0	0	0	0	0	0	0	0	0	0	1	0	0	0	0	2	0	0	0	0	0	0	0	0	0	0	0	0
chr10:22828899-22862386	22828899	22862386	0	0	0	0	0	0	0	0	0	0	0	0	0	0	0	0	0	0	0	0	0	0	0	0	0	0	0	0	2	0	0	0	0	0	0	0	0	0	0	0
chr10:22828899-22898646	22828899	22898646	0	0	0	0	0	0	0	0	0	0	0	0	1	0	0	0	0	0	0	0	0	1	0	0	0	0	0	0	0	0	0	6	0	0	0	0	0	0	0	0
chr10:22830732-22862386	22830732	22862386	0	0	1	0	0	0	0	0	0	0	0	0	0	0	0	0	0	0	0	0	0	0	0	0	1	2	1	1	0	0	0	0	1	0	4	4	0	0	0	0
chr10:22839587-22862386	22839587	22862386	0	0	0	0	0	0	0	0	1	0	1	0	0	0	0	0	0	0	0	0	1	0	0	0	1	0	0	1	2	1	0	12	1	0	6	0	0	0	0	0
chr10:22839587-22880710	22839587	22880710	0	1	0	0	0	0	0	0	0	0	0	0	0	0	0	0	0	0	0	0	0	0	0	0	0	1	0	0	0	0	0	0	0	0	0	1	6	0	0	0
chr10:22839587-22896952	22839587	22896952	0	0	0	0	0	0	0	0	0	0	0	0	0	0	0	0	0	0	0	0	0	0	0	0	0	0	0	0	3	0	0	0	1	4	0	0	0	0	0	0
chr10:22839587-22898646	22839587	22898646	0	0	0	0	0	0	0	0	0	0	0	0	0	0	0	0	0	0	0	0	0	0	2	0	0	1	0	0	0	0	0	0	4	2	5	2	3	0	0	0
chr10:22856779-22880710	22856779	22880710	0	0	0	0	0	0	0	0	2	0	0	0	0	0	0	1	0	0	0	0	0	0	1	0	0	0	0	0	0	0	0	0	1	2	0	0	0	0	0	0
chr10:22856779-22896952	22856779	22896952	0	0	0	0	0	0	0	0	0	0	0	0	0	0	0	0	0	0	0	0	0	0	0	0	0	0	0	0	0	0	0	0	0	0	0	2	2	0	0	0
chr10:22856779-22898646	22856779	22898646	0	0	0	0	0	1	0	0	0	0	0	0	0	0	0	0	0	0	1	0	0	1	1	1	2	1	0	0	0	0	11	0	1	6	28	3	0	0	5	0
chr10:22862239-22898646	22862239	22898646	0	0	0	0	0	0	0	0	0	0	0	0	0	0	0	0	0	0	0	0	0	0	0	0	0	0	0	0	0	0	0	0	0	0	1	4	0	0	0	0
chr10:22880557-22898646	45761114	45797292	1	1	0	0	0	0	1	0	0	1	0	3	0	1	0	0	0	0	2	1	2	2	1	0	10	6	1	8	18	2	0	13	25	18	47	46	13	0	13	8
chr10:22896855-22898646	22896855	22898646	1	0	0	1	0	0	0	1	0	0	0	0	0	0	0	0	0	0	0	0	1	0	0	1	1	0	0	0	0	5	0	0	0	7	7	0	0	0	0	0
chr10:24893240-24896832	24893240	24896832	0	0	0	0	0	0	0	0	0	0	0	0	0	0	0	0	0	0	0	0	0	0	0	0	0	1	0	1	0	0	0	0	0	5	0	0	0	0	0	0
chr10:24908401-24924032	24908401	24924032	0	0	0	0	0	0	0	0	0	0	0	0	0	0	0	0	0	0	0	0	0	0	0	0	0	0	0	0	0	0	5	0	0	0	0	0	0	0	0	0
chr10:24918924-24959326	24918924	24959326	0	0	0	0	0	0	0	0	0	0	0	0	0	0	0	1	0	0	0	0	0	0	0	0	2	0	0	0	0	0	0	0	0	2	0	0	0	0	0	0
chr10:255828-267296	255828	267296	0	0	0	0	0	0	0	0	0	0	0	0	0	0	0	2	0	0	0	0	0	0	0	0	0	0	0	0	0	0	0	0	0	0	0	0	0	0	0	0
chr10:26789747-26792203	26789747	26792203	0	0	0	0	0	0	0	0	0	0	0	0	0	0	0	0	0	0	0	0	0	0	0	0	0	0	0	0	0	0	0	0	0	0	0	0	0	0	7	0
chr10:26789747-26802589	26789747	26802589	0	0	0	2	0	0	0	0	0	0	0	0	0	0	0	0	0	0	0	0	0	0	0	0	0	0	0	0	0	0	0	0	0	0	0	1	0	0	0	0
chr10:27040526-27059274	27040526	27059274	0	0	0	0	0	0	0	0	0	0	0	0	0	0	0	0	0	0	0	0	0	0	0	0	0	0	0	0	0	0	0	0	0	1	0	0	0	0	0	4
chr10:27047990-27059274	54095980	54118548	0	0	0	0	0	0	0	0	0	0	0	0	0	0	1	0	0	0	0	0	0	0	0	0	0	2	0	0	0	0	0	0	1	1	0	0	0	0	0	0
chr10:27053438-27054247	27053438	27054247	0	0	0	0	0	0	0	0	0	0	0	0	0	0	0	0	0	0	0	0	0	1	0	0	0	0	0	0	0	0	0	0	0	0	6	0	0	0	0	0
chr10:27054146-27059274	54108292	54118548	0	0	0	0	0	0	0	0	0	0	0	0	0	0	0	0	0	1	0	0	0	0	1	0	0	0	1	1	1	3	0	0	12	4	2	13	0	0	0	0
chr10:27054146-27066170	27054146	27066170	0	0	0	0	0	0	0	0	0	0	0	0	0	0	0	0	0	0	0	0	0	0	0	0	0	0	0	0	0	0	0	0	0	0	3	1	0	0	0	0
chr10:27295845-27317874	27295845	27317874	0	0	0	0	0	0	0	0	0	0	0	0	0	0	0	0	0	0	0	0	0	0	0	0	0	0	0	0	0	0	0	0	0	0	3	0	0	0	0	0
chr10:27301810-27313488	27301810	27313488	0	0	0	1	0	0	0	0	0	0	0	0	0	0	0	0	0	0	0	0	0	0	0	0	0	0	0	0	0	0	0	0	0	0	3	0	0	0	0	0
chr10:27311486-27322306	27311486	27322306	0	0	0	0	0	1	0	0	0	0	0	0	1	0	0	0	0	0	0	0	0	1	0	1	0	0	0	0	3	2	0	0	0	2	0	0	3	0	0	0
chr10:27311486-27337908	27311486	27337908	1	0	0	1	0	0	1	0	1	0	2	2	0	0	0	1	0	1	1	0	0	0	0	0	0	0	0	0	0	0	0	5	0	0	0	0	0	0	0	0
chr10:27317780-27326983	27317780	27326983	0	0	0	0	0	0	0	0	0	0	0	0	0	0	0	0	0	0	0	0	0	0	0	0	0	0	0	0	0	0	0	0	0	2	0	0	0	0	0	0
chr10:27326114-27337908	27326114	27337908	1	0	0	0	0	0	1	0	0	0	0	0	2	0	0	2	0	0	0	1	1	0	0	0	0	2	0	0	0	0	0	1	1	0	0	0	0	0	0	0
chr10:27355415-27368090	27355415	27368090	0	0	0	0	0	0	0	0	0	0	0	0	0	0	0	0	0	0	0	0	0	0	0	0	0	0	0	0	0	0	0	0	0	0	2	0	0	0	0	0
chr10:27355415-27381441	27355415	27381441	0	0	0	0	0	0	0	0	0	0	0	1	0	0	0	0	0	0	0	0	0	0	0	0	0	0	0	0	0	0	0	0	0	0	2	0	0	0	0	0
chr10:27356085-27381441	27356085	27381441	0	0	0	0	0	0	0	0	0	0	0	0	0	0	0	0	0	0	0	0	0	0	0	0	0	0	0	0	0	0	0	0	0	2	6	0	0	0	0	0
chr10:27403449-27410377	27403449	27410377	0	0	0	0	0	0	0	0	0	0	0	0	0	0	0	0	0	0	0	1	1	0	0	1	0	0	0	0	0	0	0	0	0	0	5	0	0	0	0	0
chr10:27404988-27406656	27404988	27406656	0	0	0	0	0	0	0	0	0	0	0	0	0	0	0	0	0	0	0	0	0	0	0	0	4	0	0	0	0	0	0	0	0	0	0	0	0	0	0	0
chr10:27406504-27410377	27406504	27410377	0	0	0	0	0	0	0	0	0	0	0	0	0	0	0	0	0	0	0	0	0	0	0	0	0	0	0	1	0	0	0	0	0	0	0	0	8	0	0	0
chr10:27409363-27415715	27409363	27415715	0	0	0	0	0	0	0	0	0	0	0	0	0	0	0	0	0	0	0	0	0	0	0	0	3	0	0	0	0	0	7	0	0	0	0	0	0	0	0	0
chr10:27420787-27425314	27420787	27425314	0	1	0	1	0	0	0	0	1	0	0	0	0	0	0	0	0	0	0	0	0	0	0	1	2	0	0	0	0	0	0	0	0	0	0	0	0	0	0	0
chr10:27422967-27425314	27422967	27425314	0	1	0	0	2	0	0	0	0	0	0	0	0	0	0	0	0	0	0	0	0	0	0	0	0	0	0	0	0	0	0	0	0	0	0	0	2	0	0	0
chr10:27431315-27434519	27431315	27434519	0	0	0	0	0	0	0	0	0	0	0	0	0	0	0	0	0	0	0	1	0	0	1	0	0	0	0	0	0	0	7	0	8	0	0	0	5	0	0	0
chr10:27447477-27454468	27447477	27454468	1	0	0	0	0	0	0	0	0	0	0	0	0	0	0	0	0	0	0	0	0	0	0	0	0	1	0	0	0	0	0	0	0	3	2	0	0	0	0	0
chr10:27447477-27456203	27447477	27456203	0	0	0	0	0	0	0	0	0	0	0	0	0	0	0	0	0	0	0	0	0	0	0	0	0	0	0	0	0	0	0	0	0	0	0	3	0	0	0	0
chr10:27453992-27454468	27453992	27454468	1	0	0	2	0	0	2	0	0	0	1	0	1	1	0	0	1	0	2	2	0	1	1	0	0	2	0	0	2	5	0	0	0	3	0	6	0	0	7	0
chr10:27458872-27460012	27458872	27460012	0	0	0	0	1	0	1	0	0	0	0	0	1	0	0	0	0	0	0	0	0	1	0	0	0	0	1	0	0	0	7	0	0	2	1	0	0	0	0	0
chr10:27458872-27462188	27458872	27462188	2	1	0	0	1	0	0	0	0	1	0	0	0	0	0	1	0	0	0	1	0	0	0	0	0	0	0	0	1	0	0	0	0	6	0	1	2	0	0	0
chr10:27458872-27470510	27458872	27470510	1	0	0	0	0	1	1	0	0	0	1	0	2	0	1	0	1	0	0	1	0	0	0	1	0	0	0	0	3	0	12	0	0	0	0	0	0	0	0	0
chr10:28822926-28903614	28822926	28903614	0	0	0	0	0	0	0	0	0	0	0	0	0	0	0	0	0	0	0	0	0	0	0	0	0	0	0	0	0	0	0	0	0	0	0	3	0	0	0	0
chr10:28824490-28879761	28824490	28879761	0	0	0	0	0	0	0	0	0	0	0	0	0	0	0	0	0	0	0	0	0	0	0	0	0	0	0	0	0	0	0	0	0	4	0	0	0	0	0	0
chr10:28824490-28884970	28824490	28884970	0	0	0	0	0	0	0	0	0	0	0	0	0	0	0	0	0	0	0	0	0	0	0	0	0	0	0	0	0	0	2	0	0	0	0	0	0	0	0	0
chr10:28872327-28879761	57744654	57759522	0	0	0	0	0	0	0	0	0	0	0	0	0	0	0	1	0	0	0	0	0	0	0	0	0	0	0	0	2	3	0	0	0	19	9	8	0	0	0	13
chr10:28872327-28884970	28872327	28884970	1	1	1	2	0	0	0	0	0	0	0	1	0	1	1	0	0	1	0	2	0	1	3	5	2	2	0	3	1	2	0	0	1	29	35	2	22	0	0	12
chr10:28878664-28879761	28878664	28879761	0	0	0	0	0	0	0	0	0	0	0	0	0	0	0	0	0	0	0	0	0	0	0	0	0	1	0	0	0	0	0	0	0	5	0	0	0	0	0	0
chr10:28878664-28884970	28878664	28884970	0	0	0	0	0	0	0	0	0	0	0	0	0	0	0	0	0	0	0	0	0	0	0	0	0	0	0	0	0	0	0	0	0	0	0	0	0	0	5	0
chr10:28878664-28906713	28878664	28906713	0	0	0	0	0	0	0	0	0	0	0	0	0	0	0	0	0	0	0	0	0	0	0	0	0	0	0	0	0	0	0	0	3	0	0	0	0	0	0	0
chr10:28899627-28905291	28899627	28905291	0	0	0	0	0	0	0	0	0	0	0	0	0	0	0	0	0	0	0	0	0	0	0	0	0	0	0	0	0	6	0	0	0	0	0	0	0	0	0	0
chr10:28903495-28906713	28903495	28906713	0	0	0	0	0	0	0	0	0	0	0	0	0	0	0	0	0	0	0	0	0	0	0	0	0	2	0	0	0	0	0	0	0	0	0	0	0	0	0	0
chr10:30615352-30630569	30615352	30630569	0	0	0	0	0	0	0	0	0	0	0	0	0	0	0	0	0	0	0	0	0	0	0	0	0	0	0	0	2	0	0	0	0	0	0	0	0	0	0	0
chr10:30727844-30728203	30727844	30728203	0	0	0	0	0	0	0	0	0	0	0	0	0	0	0	0	0	0	0	0	0	0	0	0	0	0	0	0	0	0	0	0	0	0	6	0	0	0	0	0
chr10:30739186-30740673	30739186	30740673	0	0	0	0	0	0	0	0	0	0	0	0	0	0	0	0	0	0	0	0	0	1	0	0	0	0	0	0	0	0	0	0	0	0	0	1	3	0	0	0
chr10:3124579-3143746	3124579	3143746	0	0	0	0	0	0	0	0	0	0	0	0	0	0	0	0	0	0	0	0	0	0	0	0	0	0	0	0	0	0	0	0	0	0	0	2	0	0	0	0
chr10:3160973-3162236	3160973	3162236	0	1	0	0	0	0	0	0	0	0	0	0	0	0	0	0	1	0	0	0	0	0	0	0	0	0	0	0	1	0	0	0	0	2	0	1	0	0	0	0
chr10:31644072-31676195	63288144	63352390	0	0	0	0	0	0	0	0	0	0	0	0	0	0	0	0	0	1	0	0	1	0	0	0	0	1	0	0	1	8	0	0	0	5	4	4	5	0	2	0
chr10:31644072-31676727	31644072	31676727	0	1	0	0	0	0	0	0	0	0	0	0	0	0	0	0	0	1	0	1	1	0	0	0	0	0	0	0	0	1	0	0	0	5	4	0	0	0	2	0
chr10:31644075-31676195	63288150	63352390	0	0	0	0	0	0	1	0	0	0	0	0	0	0	1	0	0	0	0	0	0	0	0	1	2	0	0	0	0	0	0	4	1	0	6	4	4	0	4	0
chr10:31644075-31750166	31644075	31750166	0	0	0	0	0	0	0	0	0	0	0	0	0	0	0	0	0	0	0	0	0	0	0	0	0	0	0	0	0	0	0	0	0	3	0	0	0	0	0	0
chr10:31661946-31676195	63323892	63352390	1	0	0	0	0	0	0	0	0	0	1	1	0	0	0	1	0	0	0	1	0	2	1	0	0	0	0	0	0	5	2	1	11	11	11	4	2	0	5	0
chr10:31661946-31676727	31661946	31676727	0	1	0	0	0	0	0	0	0	0	0	0	0	0	0	0	0	0	0	0	1	0	0	0	0	0	1	0	0	1	0	0	1	0	2	1	4	0	1	0
chr10:31661946-31750166	31661946	31750166	0	1	0	0	1	0	0	0	0	0	0	0	1	1	0	0	0	0	1	1	0	2	0	4	2	0	0	2	2	0	0	1	0	4	14	5	3	0	0	0
chr10:31661946-31791437	31661946	31791437	0	0	0	0	0	0	0	0	0	0	0	0	0	0	0	0	0	0	0	0	0	0	0	0	0	0	0	0	0	0	0	0	0	0	2	3	0	1	1	0
chr10:3174571-3178030	6349142	6356060	0	0	0	0	0	0	0	0	1	0	0	0	0	0	0	0	0	0	0	0	0	0	0	0	0	0	0	0	3	2	0	0	1	1	0	0	2	0	0	0
chr10:31749965-31750166	31749965	31750166	0	0	0	0	0	0	0	0	0	0	1	0	0	0	0	0	0	1	1	1	0	0	0	1	0	0	0	0	0	0	0	0	3	7	4	4	0	0	0	0
chr10:31749965-31791437	31749965	31791437	0	0	0	0	0	0	0	0	0	0	0	0	0	0	0	0	0	0	0	0	0	0	0	0	0	0	0	0	1	0	0	0	3	0	0	4	0	0	0	0
chr10:3200231-3202522	3200231	3202522	1	0	1	0	0	0	0	0	0	1	0	0	0	0	1	0	0	1	0	0	0	0	0	0	0	0	0	0	0	0	0	0	1	0	0	2	0	0	8	0
chr10:3201105-3202522	3201105	3202522	1	0	0	0	2	0	0	0	0	0	0	0	0	0	0	0	0	0	0	0	0	0	2	0	0	0	0	0	0	0	0	0	0	0	0	1	0	0	0	0
chr10:3202039-3202522	3202039	3202522	0	0	0	0	0	0	0	0	0	0	0	0	0	0	0	0	0	0	0	0	0	0	0	0	0	0	0	0	3	0	0	0	0	0	0	0	0	0	0	0
chr10:3205916-3209234	3205916	3209234	0	0	1	0	0	0	0	0	0	1	0	0	0	0	0	0	0	0	0	0	0	0	0	0	0	0	0	0	2	0	0	0	0	3	0	0	0	0	0	0
chr10:32109314-32120728	32109314	32120728	0	0	0	0	0	0	0	0	0	0	0	0	0	0	0	0	0	0	0	0	0	0	0	0	0	0	0	0	0	0	0	0	2	0	0	0	0	0	0	0
chr10:32120666-32150586	32120666	32150586	0	0	0	0	0	0	0	0	0	0	0	0	0	0	0	0	0	0	0	0	0	0	0	0	0	0	0	0	0	0	0	0	0	2	0	1	0	0	0	0
chr10:32128232-32150586	32128232	32150586	0	0	0	0	0	0	0	0	0	0	0	0	0	0	0	0	0	0	0	0	0	0	0	0	0	0	0	0	0	0	0	0	0	2	0	0	0	0	0	0
chr10:32150322-32199491	32150322	32199491	0	0	0	0	0	0	0	0	0	0	0	0	0	0	0	0	0	0	0	0	0	0	0	0	0	0	0	0	0	0	0	0	0	0	0	2	0	0	0	0
chr10:32197099-32197854	32197099	32197854	0	0	0	0	0	0	0	0	0	0	0	0	0	0	0	0	0	0	0	0	0	0	0	0	0	0	0	0	0	0	0	0	0	2	0	4	0	0	0	0
chr10:32197099-32199491	32197099	32199491	2	0	0	0	1	1	0	0	0	0	1	3	0	0	0	1	1	0	0	0	0	2	0	0	2	3	1	1	4	4	1	1	5	4	18	4	7	0	0	0
chr10:32304436-32307490	64608872	64614980	0	0	0	0	0	0	0	0	0	0	0	0	0	0	0	0	0	0	0	0	0	0	0	0	0	0	0	0	0	0	0	0	0	0	0	0	0	0	0	19
chr10:32304436-32322966	32304436	32322966	0	0	0	0	0	0	0	0	0	0	0	0	0	0	0	0	0	0	0	0	0	0	0	0	0	0	0	0	0	0	0	0	0	5	0	0	0	0	0	0
chr10:32304436-32324922	32304436	32324922	0	0	0	0	0	0	0	0	0	0	0	0	0	0	0	0	0	0	0	0	0	0	0	0	0	0	0	0	0	3	0	0	0	0	0	0	0	0	0	0
chr10:32304436-32326306	32304436	32326306	0	0	0	0	0	0	0	0	0	0	0	0	0	0	0	0	0	0	0	0	0	0	0	0	0	0	0	2	0	0	0	0	0	0	0	0	0	0	0	0
chr10:32304436-32337479	32304436	32337479	0	0	0	0	0	0	0	1	0	0	0	0	0	0	0	0	0	0	0	0	0	0	0	1	0	0	0	0	0	0	0	0	0	6	6	2	0	0	0	0
chr10:32306070-32308887	32306070	32308887	0	0	0	1	0	0	0	0	0	0	0	0	0	0	0	0	0	0	0	1	0	0	0	0	0	0	0	0	0	0	0	0	2	0	5	1	0	0	1	0
chr10:32306070-32310059	32306070	32310059	0	0	0	0	0	0	0	0	0	0	0	0	0	0	0	0	0	0	0	0	0	0	0	0	0	0	0	0	0	3	0	0	0	0	0	0	0	0	0	0
chr10:32306070-32310215	32306070	32310215	0	0	0	0	0	0	0	0	0	0	0	0	0	0	0	0	0	0	0	2	0	0	0	0	0	0	0	0	0	0	0	0	0	0	0	0	0	0	0	0
chr10:32306070-32337479	32306070	32337479	0	0	0	0	0	0	0	0	0	0	0	0	0	0	0	0	0	0	0	0	0	0	0	0	0	1	0	1	0	0	0	0	0	0	2	2	0	0	0	0
chr10:32307243-32308887	32307243	32308887	0	0	0	0	0	0	0	0	0	0	0	0	0	0	0	0	0	0	0	0	0	0	0	0	0	0	0	0	0	0	0	0	6	0	0	0	0	0	0	0
chr10:32308785-32310215	32308785	32310215	0	1	0	0	0	0	0	0	0	0	0	0	0	0	1	0	0	0	1	1	1	1	2	0	0	1	4	1	0	0	0	9	7	12	0	3	0	0	0	0
chr10:32308785-32326535	32308785	32326535	0	0	0	0	0	0	0	0	0	0	0	0	0	0	0	0	0	0	0	0	0	0	0	0	0	0	0	0	0	0	0	0	0	0	0	3	0	0	0	0
chr10:32311067-32311964	32311067	32311964	0	0	0	0	0	0	0	0	0	0	0	0	0	0	0	0	0	0	0	0	0	0	0	0	0	0	0	0	0	0	16	0	0	0	0	0	0	0	0	0
chr10:32311067-32322966	32311067	32322966	0	0	0	0	0	0	0	0	0	0	0	0	0	0	0	0	0	0	0	0	0	0	0	0	0	0	0	0	0	0	0	0	0	2	0	0	0	0	0	0
chr10:32311067-32337479	32311067	32337479	0	0	0	0	0	0	0	0	0	0	0	0	0	0	0	0	0	0	1	0	0	0	0	0	0	0	1	1	0	0	0	0	0	0	1	4	0	0	0	0
chr10:32317355-32324922	32317355	32324922	0	0	0	0	0	0	0	0	0	0	0	0	0	0	0	0	0	0	0	0	0	0	0	0	0	0	0	0	1	0	0	0	0	0	4	0	0	0	0	0
chr10:32317355-32326535	32317355	32326535	1	0	1	0	0	0	0	0	0	0	0	0	0	0	0	0	0	0	0	0	0	0	0	0	0	2	0	1	0	0	0	0	0	2	0	0	0	0	0	0
chr10:32320000-32322966	32320000	32322966	0	0	0	0	0	0	0	0	0	0	0	0	0	0	0	0	0	0	0	0	0	0	0	0	0	0	0	0	0	0	0	0	0	5	0	0	0	0	0	0
chr10:32320000-32327146	32320000	32327146	0	0	0	0	0	0	0	0	0	0	0	0	0	0	0	0	0	0	0	0	0	0	0	0	0	0	0	0	0	0	0	0	0	0	0	0	3	0	0	0
chr10:32320000-32337479	32320000	32337479	0	0	0	0	0	0	0	0	0	0	0	0	0	0	0	0	0	0	0	0	0	0	0	0	0	0	0	0	0	5	0	0	3	0	0	0	0	0	2	0
chr10:32323617-32324922	32323617	32324922	0	0	0	0	0	0	0	0	0	0	0	0	0	0	0	0	0	0	0	0	0	0	0	0	0	0	0	0	0	0	0	0	4	0	0	0	0	0	0	0
chr10:32323617-32326306	32323617	32326306	0	0	0	0	0	0	0	0	0	0	0	0	0	0	0	0	0	0	0	0	0	0	0	0	1	0	0	0	0	2	0	0	0	0	0	0	0	0	0	0
chr10:32323617-32326535	32323617	32326535	0	0	0	0	1	0	0	0	0	0	0	0	0	0	0	0	0	0	0	0	0	0	1	0	0	1	0	1	2	5	0	0	2	1	7	0	0	0	10	0
chr10:32326181-32329385	32326181	32329385	0	0	0	0	0	0	0	0	0	0	0	0	0	0	0	0	0	0	0	0	0	0	0	0	1	0	0	0	0	0	0	7	0	0	0	2	0	0	4	0
chr10:32326181-32337479	32326181	32337479	0	0	0	0	0	0	0	0	0	0	0	0	0	0	0	0	0	0	0	0	0	0	0	0	0	0	0	0	0	0	0	0	0	0	4	0	0	0	0	0
chr10:32573625-32576202	32573625	32576202	0	0	0	0	0	0	0	0	0	0	0	0	0	0	0	0	0	0	0	0	0	0	0	0	0	0	3	0	0	0	0	0	0	0	0	0	0	0	0	0
chr10:32580090-32581572	32580090	32581572	0	0	0	0	0	0	0	0	0	0	0	0	0	0	0	0	0	0	0	0	0	0	0	0	0	0	0	0	0	0	0	0	0	0	4	0	0	0	0	0
chr10:32580090-32582665	32580090	32582665	0	0	0	0	0	0	0	0	0	0	1	0	0	0	0	0	0	0	0	0	0	0	0	0	1	1	0	0	2	0	0	7	0	0	0	0	0	0	0	0
chr10:32740519-32742364	32740519	32742364	0	0	0	0	0	0	0	0	0	0	0	0	0	0	0	0	0	0	1	0	0	0	0	0	0	1	0	0	0	0	0	0	0	2	0	1	0	0	14	0
chr10:32740519-32745262	32740519	32745262	0	0	0	0	0	0	1	0	0	0	0	0	0	0	0	0	0	0	0	0	0	0	0	0	0	0	0	0	0	0	0	0	0	0	2	0	0	0	0	0
chr10:32740519-32751631	32740519	32751631	0	0	0	0	0	0	0	0	0	0	0	0	0	0	0	0	0	0	0	0	0	0	0	0	0	0	0	0	0	0	0	2	2	0	5	2	0	0	0	0
chr10:32740519-32751977	32740519	32751977	0	0	0	0	0	0	0	0	0	0	0	0	0	0	0	0	0	0	0	0	0	0	0	0	0	0	2	0	0	0	0	0	0	0	0	1	0	0	0	0
chr10:32740519-32762951	32740519	32762951	1	0	0	3	0	0	0	0	0	0	0	0	1	2	1	0	0	0	0	0	1	4	0	0	0	2	0	0	0	5	0	0	0	0	7	1	0	0	0	0
chr10:32751610-32762951	32751610	32762951	0	0	0	1	0	0	0	0	0	0	0	0	0	0	0	1	0	0	0	0	0	0	0	0	2	0	0	0	0	0	0	0	0	0	0	0	0	0	0	0
chr10:32759991-32762951	32759991	32762951	0	0	1	0	0	0	0	0	0	0	0	0	0	0	0	0	0	0	0	0	2	0	0	0	0	0	0	0	0	4	0	0	0	0	1	2	0	0	0	0
chr10:32759991-32856819	32759991	32856819	0	0	0	0	0	0	0	0	0	0	0	0	0	0	0	0	0	0	0	0	0	0	0	0	0	0	0	0	0	0	0	0	0	0	4	0	0	0	0	0
chr10:32761408-32860821	32761408	32860821	0	0	0	0	0	0	0	0	0	0	0	0	0	0	0	0	0	0	0	0	0	0	0	0	0	0	0	0	0	0	8	0	0	0	0	0	0	0	0	0
chr10:32832227-32860821	32832227	32860821	0	0	0	0	0	0	0	0	0	0	0	0	0	0	0	0	0	0	0	0	0	0	0	0	0	0	0	0	0	0	0	0	0	0	0	0	0	0	6	0
chr10:32832227-32873232	32832227	32873232	0	0	0	0	2	0	0	1	1	2	0	1	0	0	1	5	0	0	0	0	0	0	0	0	0	0	0	0	3	9	5	7	14	2	9	0	0	9	5	0
chr10:32832227-32975008	32832227	32975008	0	0	0	0	0	0	0	0	0	0	0	0	0	0	0	0	0	0	0	0	0	0	0	0	0	0	0	0	0	0	0	0	0	4	0	0	0	0	0	0
chr10:32854485-32873232	32854485	32873232	0	1	0	3	2	0	0	1	0	1	0	0	0	1	0	0	0	0	1	0	0	1	0	0	2	6	1	1	0	0	6	0	3	5	5	4	0	0	5	0
chr10:32860786-32978091	32860786	32978091	0	0	0	0	0	0	0	0	0	0	0	0	0	0	0	0	0	0	0	0	0	0	0	0	0	0	0	0	0	0	0	2	0	0	0	0	0	0	0	0
chr10:32974897-33000658	32974897	33000658	0	0	0	0	0	0	0	0	0	0	0	0	0	0	0	0	0	0	1	0	0	0	0	0	0	0	0	0	0	0	0	0	0	0	0	0	0	0	0	3
chr10:33197295-33199383	33197295	33199383	0	0	0	0	0	0	0	0	0	0	0	0	0	0	0	0	0	0	0	1	0	0	0	0	0	0	0	0	2	0	0	0	0	0	3	0	0	0	0	0
chr10:33197295-33200598	33197295	33200598	0	0	0	0	0	0	0	0	0	0	0	0	0	0	0	0	0	0	0	0	0	0	0	0	0	0	0	0	0	0	0	0	4	0	0	0	0	0	0	0
chr10:33200375-33224486	33200375	33224486	0	0	0	0	0	0	0	0	0	0	0	0	0	0	0	0	0	0	0	0	0	0	0	0	0	0	0	0	0	0	0	0	0	0	0	0	0	0	5	0
chr10:33208812-33215037	33208812	33215037	0	0	0	0	0	0	0	0	0	0	0	0	0	0	0	0	0	0	0	0	0	0	0	0	0	0	0	0	0	0	0	0	2	0	0	0	0	0	0	0
chr10:33214798-33217192	33214798	33217192	0	0	0	0	0	0	0	0	0	0	0	0	0	0	0	0	0	0	0	0	0	0	0	0	0	0	0	0	0	0	0	0	0	5	0	0	0	0	0	0
chr10:33214798-33218972	33214798	33218972	0	0	0	0	0	0	0	0	0	0	0	0	0	0	0	0	0	0	0	0	0	0	0	0	0	0	0	0	0	0	0	0	0	0	3	0	2	0	0	0
chr10:35300775-35317815	35300775	35317815	0	0	0	0	0	0	0	0	0	0	0	0	0	0	0	0	0	0	0	0	0	0	0	0	0	0	0	0	0	0	0	0	0	5	0	0	0	0	0	0
chr10:35300775-35338693	35300775	35338693	0	0	0	0	0	0	0	0	0	0	0	0	0	0	0	0	0	0	0	0	0	0	0	0	0	0	0	0	0	0	0	0	0	0	2	0	0	0	0	0
chr10:35302626-35317815	35302626	35317815	0	0	0	0	0	0	0	0	0	0	0	0	0	0	0	0	0	0	1	0	0	0	1	0	0	0	0	0	0	0	0	0	4	7	0	0	0	0	0	0
chr10:35302626-35320547	35302626	35320547	1	0	1	0	0	0	0	0	0	0	0	0	0	0	0	0	1	0	0	0	0	0	0	2	0	0	0	0	0	0	0	0	1	0	0	1	0	0	0	0
chr10:35305119-35320547	35305119	35320547	0	0	0	0	0	0	0	0	0	0	0	0	0	0	0	0	0	0	0	0	0	0	0	0	0	0	0	0	0	0	0	3	0	0	0	0	0	4	0	0
chr10:35320227-35338693	35320227	35338693	0	0	0	0	0	0	0	0	0	0	0	0	0	0	0	0	0	0	0	0	0	0	0	0	0	0	0	0	0	0	0	0	0	0	0	2	0	0	0	0
chr10:35321362-35349896	35321362	35349896	0	0	0	0	0	0	0	0	0	0	0	0	0	0	0	0	0	0	0	0	0	0	0	0	0	0	0	2	0	0	0	0	0	0	0	0	0	0	0	0
chr10:35349801-35360267	35349801	35360267	0	0	0	0	0	0	0	1	0	0	0	0	2	0	0	0	0	0	0	0	0	0	0	1	0	0	0	0	0	0	0	0	0	0	0	0	0	0	0	0
chr10:3538344-3539916	3538344	3539916	0	0	0	0	0	0	0	0	0	0	0	0	0	0	0	0	0	0	0	0	0	0	0	0	0	0	0	0	0	0	0	0	0	4	0	0	0	0	0	0
chr10:35437295-35468204	35437295	35468204	0	0	0	0	0	0	0	0	0	0	0	0	0	0	0	0	0	0	0	0	0	0	0	0	0	0	0	0	0	0	0	0	0	0	0	0	0	7	0	0
chr10:35790428-35819171	35790428	35819171	0	0	1	0	0	0	0	0	0	0	0	0	0	0	0	0	0	0	0	0	0	0	0	0	0	0	0	0	0	0	0	0	2	0	0	0	0	0	0	0
chr10:35805450-35819171	35805450	35819171	0	0	0	0	1	0	0	0	0	1	0	0	0	0	1	0	0	0	0	0	1	0	0	0	0	1	0	0	0	0	0	0	0	1	2	3	0	0	0	0
chr10:38120159-38145265	38120159	38145265	0	0	0	0	0	0	0	0	0	0	0	0	0	0	0	0	0	0	0	0	0	0	0	0	0	0	0	0	0	2	0	0	0	6	0	0	0	0	0	0
chr10:43291921-43297666	43291921	43297666	0	0	0	0	0	0	0	2	0	0	0	0	0	0	0	0	0	0	0	0	0	0	0	0	0	0	0	0	0	0	0	0	0	0	0	0	0	0	0	0
chr10:43312046-43312942	43312046	43312942	0	0	0	0	0	0	0	0	0	0	0	0	0	0	0	1	0	0	0	0	0	0	0	0	0	0	0	0	0	9	0	0	0	0	0	0	0	0	0	0
chr10:43650344-43651258	43650344	43651258	0	0	0	0	0	0	0	0	0	0	0	0	0	0	0	0	0	0	0	0	0	0	0	0	0	0	0	0	0	0	0	0	0	3	0	0	0	0	0	0
chr10:43650344-43656043	43650344	43656043	0	0	0	0	0	0	0	0	0	0	0	0	0	0	0	0	0	0	0	0	0	0	0	0	0	0	0	0	0	0	0	0	0	6	0	0	0	0	0	0
chr10:43650344-43671480	43650344	43671480	0	0	1	0	0	0	1	0	0	0	0	2	0	0	0	0	0	0	1	0	1	1	0	0	0	0	0	0	0	0	0	0	0	2	4	2	0	0	0	0
chr10:43654162-43671480	43654162	43671480	0	0	1	0	0	0	0	0	0	0	0	0	0	0	0	0	0	0	0	0	0	0	0	0	0	0	0	0	0	0	0	0	0	0	4	0	0	0	0	0
chr10:45954567-45956859	45954567	45956859	0	0	0	0	0	0	0	0	0	0	0	0	0	0	0	0	0	0	0	0	1	0	0	0	0	0	0	0	0	0	0	0	0	0	0	4	0	0	0	0
chr10:45958598-45959775	45958598	45959775	0	0	0	0	0	0	0	0	0	0	0	0	0	0	0	0	0	0	0	0	0	0	0	0	0	0	1	0	1	0	0	0	0	0	3	2	0	0	0	0
chr10:45958598-46028737	45958598	46028737	0	0	0	0	0	0	0	0	0	0	0	0	0	0	0	0	0	0	0	0	0	0	0	0	1	0	0	0	0	0	0	0	0	0	3	0	0	0	0	0
chr10:46028557-46028737	46028557	46028737	0	0	0	0	0	0	0	0	0	0	0	0	0	0	1	0	0	0	0	0	0	0	0	0	1	0	0	0	0	0	0	0	0	0	12	1	3	0	0	0
chr10:46028557-46048652	46028557	46048652	0	0	0	0	0	0	0	0	0	0	0	0	0	0	0	0	0	0	0	0	0	0	0	0	3	0	0	0	0	0	0	0	0	0	2	4	0	0	0	0
chr10:46120030-46122553	46120030	46122553	0	0	0	1	0	0	0	0	0	0	0	0	0	0	0	0	0	1	0	0	0	0	0	0	0	0	0	0	1	0	0	0	0	5	0	0	0	0	0	0
chr10:46121398-46135411	46121398	46135411	0	0	1	0	0	0	0	0	0	0	0	0	0	0	0	0	0	0	0	0	0	0	0	0	0	0	0	0	0	0	0	0	0	5	2	0	0	0	0	0
chr10:46135263-46159290	92270526	92318580	0	0	1	0	0	0	1	0	0	0	0	0	0	0	0	0	0	0	0	0	1	5	1	0	0	0	0	0	0	14	0	6	5	9	13	1	3	0	2	10
chr10:46143741-46159290	46143741	46159290	0	0	0	0	0	0	0	0	0	0	0	0	0	0	0	0	0	0	0	0	0	0	0	0	3	0	0	2	0	0	0	1	0	0	0	0	0	0	0	0
chr10:46214753-46215403	46214753	46215403	0	0	0	0	0	0	0	0	0	0	0	0	0	0	0	0	0	0	0	0	0	0	0	0	0	1	0	0	0	0	0	0	3	8	2	3	0	0	0	0
chr10:46224309-46224474	46224309	46224474	0	0	0	0	0	0	0	0	0	0	0	0	0	0	0	0	0	0	0	0	0	0	0	0	0	0	0	0	0	0	0	0	3	4	0	0	0	0	0	0
chr10:46224309-46235694	46224309	46235694	0	0	0	0	0	0	0	0	0	0	0	0	3	0	0	0	0	0	0	0	0	0	0	0	0	0	2	2	0	1	0	0	3	9	4	8	8	4	0	5
chr10:46224309-46242095	46224309	46242095	0	0	0	0	0	0	0	0	0	0	0	0	0	0	0	0	0	0	0	0	0	0	0	0	0	0	0	0	0	0	0	3	0	0	0	4	6	0	0	0
chr10:46224309-46245654	46224309	46245654	0	0	0	0	0	0	0	0	0	0	0	0	0	0	0	0	0	1	0	0	0	0	0	0	0	0	0	0	0	2	0	0	0	0	0	2	0	0	0	0
chr10:46224309-46274583	46224309	46274583	0	0	0	0	0	0	0	0	0	0	0	0	1	0	0	0	0	0	0	0	0	0	0	0	0	0	0	0	0	0	0	0	0	0	0	2	0	1	0	0
chr10:46233430-46242095	46233430	46242095	0	0	0	0	0	0	0	0	0	0	0	0	0	0	0	0	0	0	0	0	0	0	0	0	0	0	0	0	0	0	0	0	0	4	0	0	0	0	0	0
chr10:46233430-46248685	46233430	46248685	0	0	0	0	0	0	0	0	0	0	0	0	0	0	0	0	0	0	0	0	0	0	0	0	0	0	0	0	0	0	0	0	0	0	0	0	0	0	3	0
chr10:46233430-46265066	46233430	46265066	0	0	0	0	0	0	0	0	0	0	0	0	0	0	0	0	0	0	0	0	0	0	0	0	0	0	0	0	0	0	0	0	0	0	0	2	0	1	0	0
chr10:46242047-46265066	46242047	46265066	0	0	0	0	0	0	0	0	0	0	0	0	0	0	0	0	0	0	0	0	0	0	0	0	0	0	0	0	0	0	0	0	0	0	0	0	4	0	0	0
chr10:46245543-46247001	46245543	46247001	0	0	0	0	0	0	0	0	0	0	0	0	0	0	0	0	0	0	0	0	0	0	0	0	2	0	0	0	0	0	0	0	0	0	0	0	0	5	0	0
chr10:46245543-46274583	46245543	46274583	0	0	0	0	0	0	0	0	0	0	0	0	0	0	0	0	0	0	0	0	0	0	0	0	0	0	0	0	0	0	0	0	0	0	6	0	0	0	0	0
chr10:46249933-46254849	46249933	46254849	0	0	0	0	0	0	0	0	0	0	0	0	0	0	0	0	0	0	0	0	0	0	0	0	0	2	0	0	0	0	0	0	0	0	0	0	0	0	0	0
chr10:46249933-46265066	46249933	46265066	0	0	0	0	0	0	1	0	0	0	0	0	0	0	0	0	0	0	0	0	0	0	0	0	0	0	0	0	0	0	0	2	0	0	0	0	0	0	0	0
chr10:46250383-46261258	46250383	46261258	0	0	0	0	0	0	0	0	0	0	0	0	0	0	0	0	0	0	0	0	0	0	0	0	0	0	0	0	0	0	0	0	6	0	0	1	0	0	0	0
chr10:46250383-46265066	46250383	46265066	0	0	0	0	0	0	0	0	0	0	0	0	0	0	0	0	0	0	0	0	0	0	0	0	0	0	0	0	0	1	0	0	0	0	0	0	3	6	5	0
chr10:46250383-46280141	46250383	46280141	0	0	0	0	0	0	0	0	0	0	0	0	0	0	0	0	0	0	0	0	0	0	0	0	0	0	0	0	0	0	0	0	0	0	0	4	0	0	0	0
chr10:46252459-46261258	46252459	46261258	0	0	0	0	0	0	0	0	0	0	0	0	0	0	0	0	0	0	0	0	0	0	0	0	0	0	0	0	0	0	0	0	0	0	0	0	2	0	0	0
chr10:46252459-46265066	46252459	46265066	0	0	0	0	0	0	0	0	0	0	0	0	0	0	0	0	0	0	0	0	0	0	0	0	0	0	0	0	0	0	0	0	5	0	0	0	0	0	0	0
chr10:46258835-46268806	46258835	46268806	0	0	0	0	0	0	0	0	0	0	0	0	0	0	0	0	0	0	0	0	0	0	0	0	0	0	0	0	0	0	0	0	0	0	2	0	0	0	0	0
chr10:46274400-46274583	46274400	46274583	0	0	0	0	0	0	0	0	0	0	0	0	0	0	0	0	0	0	0	0	0	0	0	0	0	0	0	0	0	0	2	0	0	0	0	0	0	0	0	0
chr10:46284318-46284939	46284318	46284939	0	0	0	0	0	0	0	0	0	0	0	0	0	0	0	0	0	0	0	0	0	0	0	0	0	0	0	0	0	0	0	0	0	0	0	0	5	0	0	0
chr10:47894571-47901442	47894571	47901442	0	0	0	0	0	0	0	0	0	0	0	0	0	0	0	0	0	0	0	0	0	0	0	0	0	0	0	0	0	0	0	3	0	3	0	2	0	0	0	0
chr10:47896655-47903206	47896655	47903206	0	0	0	0	0	0	0	0	0	0	0	0	0	0	0	0	0	0	0	0	0	0	0	0	0	0	0	0	0	0	0	0	0	0	2	0	0	0	0	0
chr10:47906677-47908135	47906677	47908135	0	0	0	0	0	0	0	0	0	0	0	0	0	0	0	0	0	0	0	0	0	0	0	0	0	0	0	0	3	0	0	0	0	0	0	0	0	0	0	0
chr10:47909169-47909819	47909169	47909819	0	0	0	0	0	0	0	0	0	0	0	0	0	0	0	0	0	0	0	0	0	0	2	0	0	0	0	1	0	0	0	0	0	0	0	1	0	0	0	0
chr10:47909169-47913703	47909169	47913703	0	0	0	0	0	0	0	0	0	0	0	0	0	0	0	0	0	0	0	0	0	0	0	0	0	0	0	0	0	0	0	0	0	0	7	0	0	0	0	0
chr10:47911499-47922366	47911499	47922366	0	0	0	0	0	0	0	0	0	0	0	0	0	0	0	0	0	0	0	0	0	0	0	0	0	0	0	0	0	0	0	0	0	0	1	1	4	0	0	0
chr10:47911499-47926172	95822998	95852344	0	0	0	0	0	0	0	0	0	0	0	0	0	0	0	0	0	0	0	0	0	0	0	0	0	0	0	0	0	0	0	0	0	0	2	1	0	0	0	0
chr10:48013518-48020565	48013518	48020565	0	0	0	0	0	0	0	0	0	0	0	0	0	0	0	0	0	0	0	0	0	0	0	0	0	0	0	0	2	0	0	0	0	0	0	0	0	0	0	0
chr10:4872866-4889491	4872866	4889491	0	0	0	0	0	0	0	0	0	0	0	0	0	0	0	0	0	0	2	0	0	0	0	0	0	0	0	0	0	0	0	0	0	2	0	1	0	0	0	0
chr10:49516137-49628363	49516137	49628363	0	0	0	0	0	0	0	0	0	0	0	0	0	0	0	0	0	0	1	0	0	0	0	0	0	0	0	0	0	0	0	0	0	0	3	0	0	0	0	0
chr10:49609654-49613024	49609654	49613024	0	0	0	0	0	0	0	0	0	0	0	0	0	0	0	0	1	0	0	0	0	0	0	0	3	0	1	0	0	0	0	0	0	5	0	0	1	0	0	0
chr10:49609654-49618211	49609654	49618211	1	0	0	0	0	0	0	0	0	0	0	1	0	0	0	1	1	0	1	1	0	0	1	0	3	1	0	0	0	0	0	0	1	11	3	10	6	8	2	0
chr10:49628197-49635186	49628197	49635186	0	0	0	0	0	0	0	0	0	0	0	0	0	0	0	0	0	0	0	0	0	0	0	0	0	0	0	0	0	2	0	0	0	0	0	0	0	0	0	0
chr10:50678227-50691562	50678227	50691562	0	0	0	0	0	0	0	0	0	0	0	0	0	0	0	0	0	0	0	0	0	0	0	0	0	0	0	0	0	0	0	0	0	0	0	2	0	0	0	0
chr10:50678227-50701298	50678227	50701298	0	0	0	0	0	0	0	0	0	0	2	0	0	0	0	0	0	0	0	0	0	0	0	0	0	0	0	0	0	0	0	0	0	0	1	0	0	0	0	0
chr10:50678227-50708742	50678227	50708742	0	0	0	0	0	0	0	0	0	0	0	0	0	0	0	0	0	0	0	0	0	2	0	0	0	0	0	0	0	1	0	0	0	0	0	0	0	0	0	0
chr10:50678227-50714058	50678227	50714058	0	0	0	0	0	0	0	0	0	0	0	0	0	1	0	0	0	0	0	0	0	0	0	0	0	0	0	1	0	2	0	0	0	0	0	0	0	0	0	0
chr10:50736462-50741024	50736462	50741024	0	0	0	0	0	0	0	0	0	0	0	0	0	0	0	0	0	0	0	0	0	0	0	0	0	2	0	0	0	7	0	0	0	0	0	0	0	0	0	0
chr10:51093248-51364771	51093248	51364771	2	0	0	0	1	0	0	0	0	0	0	0	0	0	0	0	0	0	0	0	0	0	0	0	0	0	0	0	0	0	0	0	0	0	0	0	0	0	0	0
chr10:51123962-51364771	51123962	51364771	0	0	0	0	0	0	0	0	1	0	1	1	0	0	0	0	0	0	1	0	0	1	0	2	2	0	0	0	0	0	0	0	0	0	3	0	0	0	1	0
chr10:51372578-51387763	51372578	51387763	0	0	0	0	0	0	0	0	0	0	0	0	0	0	0	0	0	0	0	0	0	0	0	0	0	2	0	0	0	0	0	0	0	0	0	0	0	0	0	0
chr10:51374369-51387763	51374369	51387763	1	2	4	1	1	0	1	0	0	2	1	2	0	0	1	3	1	2	1	0	1	0	0	2	2	0	0	1	2	0	0	0	2	2	14	5	0	0	4	0
chr10:51381438-51387763	51381438	51387763	0	0	0	0	0	0	0	0	0	0	0	0	0	0	0	0	0	0	0	1	0	0	0	0	0	0	0	0	0	0	0	0	0	0	0	6	1	0	0	0
chr10:51381438-51732902	51381438	51732902	2	0	0	0	0	0	0	0	0	0	0	0	0	0	0	0	0	0	0	0	0	0	0	0	0	0	0	0	0	0	0	0	0	0	0	0	0	0	0	0
chr10:51579127-51581378	51579127	51581378	0	0	0	1	0	0	0	0	0	0	0	0	0	0	0	0	0	0	1	0	3	1	1	0	10	6	6	6	5	5	2	1	3	36	4	19	3	8	6	0
chr10:51579127-51586411	51579127	51586411	0	0	0	0	0	1	1	1	0	0	0	0	1	0	0	0	0	0	1	0	0	0	0	0	0	2	3	1	2	0	0	0	5	7	7	9	0	0	0	0
chr10:51580555-51586411	51580555	51586411	0	0	0	0	0	0	0	0	0	0	0	0	0	0	0	0	0	0	0	0	0	0	0	0	0	0	0	0	0	0	0	0	0	0	2	0	0	0	0	0
chr10:51582182-51585599	51582182	51585599	0	0	0	0	0	0	0	0	0	0	0	0	0	0	0	0	0	0	1	0	0	2	0	0	1	1	0	2	2	0	0	0	2	0	4	2	1	0	5	0
chr10:51584615-51585599	51584615	51585599	0	0	0	0	0	0	1	0	0	0	0	1	2	1	0	1	0	1	1	2	5	7	4	2	12	5	6	17	11	1	2	3	13	16	25	4	1	2	22	0
chr10:51606987-51613311	51606987	51613311	0	0	0	0	0	0	0	0	1	1	0	0	0	0	0	0	1	1	0	0	1	1	1	0	1	0	2	5	2	0	0	0	0	2	1	11	1	0	0	0
chr10:51606987-51620382	51606987	51620382	2	0	0	1	0	0	0	0	0	0	0	1	0	0	0	0	0	1	0	0	0	0	0	0	3	0	1	3	2	0	0	0	2	6	2	3	12	5	4	0
chr10:51629985-51633029	51629985	51633029	1	0	0	0	1	0	0	0	0	0	0	0	0	0	0	0	0	0	0	1	0	0	0	0	1	0	0	0	0	2	0	0	0	0	0	0	0	5	0	0
chr10:51629985-51648990	51629985	51648990	0	0	0	0	1	0	0	2	0	0	0	1	1	0	0	1	0	0	0	0	0	0	0	0	3	0	0	2	0	0	0	0	0	0	0	1	0	0	4	0
chr10:51648915-51707661	51648915	51707661	0	0	0	0	0	0	0	0	0	0	0	0	0	0	0	0	0	0	0	0	0	0	0	0	0	0	0	0	0	0	0	0	0	4	0	0	0	0	0	0
chr10:51829306-51829471	51829306	51829471	0	0	0	0	0	0	0	0	0	0	0	0	0	0	0	0	0	0	0	0	0	0	0	0	0	0	0	0	0	0	0	0	0	11	0	0	0	0	0	0
chr10:51829306-51840691	51829306	51840691	0	0	0	0	0	0	1	0	0	2	0	0	0	0	0	0	0	0	0	0	1	2	0	3	1	0	1	5	2	2	0	3	8	14	5	9	4	0	10	0
chr10:51829306-51851278	51829306	51851278	0	0	0	0	0	0	0	0	0	0	0	0	0	0	0	0	0	0	0	0	0	0	0	0	0	0	1	0	0	0	8	0	0	0	0	0	0	0	0	0
chr10:51829306-51851993	51829306	51851993	0	0	0	0	0	0	0	0	0	0	0	0	0	0	0	0	0	0	0	0	0	0	0	0	0	0	0	0	2	0	0	4	0	0	0	0	0	5	0	0
chr10:51829306-51866225	51829306	51866225	0	0	0	0	0	0	0	0	0	0	0	0	0	0	0	1	0	0	0	0	0	0	0	0	0	0	0	0	0	4	0	0	0	1	0	6	0	0	5	0
chr10:51829306-51870030	51829306	51870030	0	0	0	0	0	0	0	0	0	0	0	0	0	0	0	0	0	0	0	0	0	0	0	0	0	0	0	0	0	0	0	0	0	0	5	2	9	0	0	0
chr10:51838434-51845318	51838434	51845318	0	0	0	0	0	0	0	0	0	0	0	0	0	0	0	0	0	0	0	0	0	0	0	0	0	0	0	0	2	3	0	0	0	0	0	0	0	0	0	0
chr10:51838434-51847082	51838434	51847082	0	0	0	0	0	0	0	0	0	0	0	0	0	0	0	0	0	0	0	0	0	0	0	0	0	0	0	0	0	0	0	0	0	3	0	1	0	0	0	0
chr10:51838434-51851993	103676868	103703986	0	0	0	0	0	0	0	0	0	0	0	0	0	0	0	0	0	0	0	0	0	0	0	0	0	0	0	0	0	0	0	0	0	5	0	3	0	4	7	0
chr10:51840517-51845318	51840517	51845318	0	0	0	0	0	0	0	0	0	0	0	0	0	0	0	0	0	0	0	0	0	0	0	0	0	0	0	0	0	0	0	0	0	0	2	0	0	0	0	0
chr10:51840517-51847082	51840517	51847082	0	0	0	0	0	0	0	0	0	0	0	0	0	0	0	0	0	0	0	0	0	0	0	0	0	0	0	0	0	0	0	0	0	0	0	2	0	0	0	0
chr10:51843831-51851278	51843831	51851278	0	0	0	0	0	0	0	0	0	0	0	0	0	0	0	0	0	0	0	0	0	0	0	0	0	0	0	0	0	0	0	0	0	0	3	0	0	0	0	0
chr10:51853027-51853677	51853027	51853677	0	0	0	0	0	1	0	0	0	0	0	0	0	0	0	0	0	0	0	0	0	0	0	0	0	1	0	0	3	0	0	0	0	0	0	0	0	0	0	0
chr10:51853027-51863903	51853027	51863903	0	0	0	0	0	0	0	0	0	0	0	0	0	0	0	0	0	0	0	0	0	0	0	0	0	0	0	0	0	0	0	0	2	0	0	0	0	0	0	0
chr10:51855358-51870030	51855358	51870030	0	0	0	0	0	0	0	0	0	0	0	0	0	0	0	0	0	0	0	0	0	0	0	0	0	0	0	0	0	0	0	0	0	0	8	1	1	0	0	0
chr10:51855358-51873757	51855358	51873757	0	0	0	0	0	0	0	0	0	0	0	0	0	0	0	0	0	0	0	0	0	0	0	0	0	0	0	0	2	0	0	0	0	0	0	0	0	0	0	0
chr10:51857434-51877818	51857434	51877818	0	0	0	0	0	0	0	0	0	0	0	0	0	0	0	0	0	0	0	0	0	0	0	0	0	0	0	0	0	0	0	0	0	0	3	0	6	0	0	0
chr10:51863801-51870030	51863801	51870030	0	0	0	0	0	0	0	0	0	0	0	0	0	0	0	0	0	0	0	0	0	0	0	0	0	0	0	0	0	0	0	0	0	0	7	0	0	0	0	0
chr10:51863801-51879529	51863801	51879529	0	0	0	0	0	0	0	0	0	0	0	0	0	0	0	0	0	0	0	0	0	0	0	0	0	0	0	0	0	0	0	0	5	0	0	0	0	0	0	0
chr10:51877665-51879529	51877665	51879529	0	0	0	0	0	0	0	0	0	0	0	0	0	0	0	0	0	0	0	0	0	0	0	0	0	0	0	0	0	0	0	0	0	2	0	0	0	0	0	0
chr10:51970582-51974628	51970582	51974628	0	0	0	0	0	0	0	0	0	0	0	0	0	0	0	0	0	0	0	0	0	0	0	0	0	0	0	0	0	0	0	0	0	3	0	0	0	0	0	0
chr10:51992943-51995824	51992943	51995824	0	0	0	0	0	0	0	0	0	0	0	0	0	0	0	0	0	0	0	0	0	0	0	0	0	0	0	0	0	0	0	0	0	0	0	0	2	0	0	0
chr10:52086964-52104105	52086964	52104105	0	0	0	0	0	0	0	0	0	0	0	0	0	0	0	0	0	0	0	0	0	0	1	0	0	0	0	0	0	0	0	0	1	0	0	2	0	0	0	0
chr10:52086964-52350007	52086964	52350007	0	0	0	0	0	0	0	0	0	0	0	0	0	0	0	0	0	0	0	0	0	0	0	0	0	0	0	0	0	0	0	0	0	0	0	0	0	0	0	5
chr10:52100146-52104105	52100146	52104105	0	0	0	0	0	0	0	0	0	0	0	0	0	0	0	0	0	0	0	0	0	1	0	0	0	0	0	0	3	7	0	0	0	1	0	1	0	0	0	0
chr10:52103251-52104105	52103251	52104105	0	1	0	0	0	0	1	0	0	2	0	0	0	0	0	0	0	0	2	0	0	0	0	0	0	1	0	0	0	0	0	0	2	0	6	4	0	0	0	0
chr10:52103251-52350007	52103251	52350007	0	0	0	0	0	0	0	0	0	0	0	0	0	0	0	0	0	0	0	0	0	0	1	0	0	0	0	0	0	0	0	0	0	0	5	0	0	0	0	0
chr10:52193235-52226692	52193235	52226692	0	0	0	0	2	0	1	0	0	0	0	0	0	0	1	1	1	3	0	0	1	2	2	0	0	1	1	6	0	0	0	15	2	6	3	5	0	0	0	0
chr10:52193235-52279681	52193235	52279681	0	1	0	0	0	0	0	0	0	0	0	0	0	0	0	0	1	1	0	0	0	1	0	0	0	2	0	0	2	0	0	8	0	6	0	3	9	0	1	0
chr10:52193235-52350007	104386470	104700014	0	0	0	0	0	2	0	1	1	0	0	3	0	0	0	0	3	0	1	0	6	2	7	1	14	5	7	3	28	9	11	4	27	14	47	18	19	18	26	7
chr10:52220432-52226692	52220432	52226692	0	1	0	0	0	0	1	0	1	0	1	1	2	0	0	0	1	2	0	0	1	1	1	3	0	0	0	0	0	1	0	0	0	0	0	0	0	0	0	0
chr10:52220432-52279681	52220432	52279681	0	0	0	0	0	0	0	0	0	0	0	0	0	0	0	0	0	0	0	0	0	0	0	0	0	0	0	0	3	0	0	0	0	6	0	0	0	0	0	0
chr10:52220432-52350007	104440864	104700014	0	0	0	0	0	0	2	0	0	0	0	1	1	2	0	0	0	2	0	0	3	3	0	3	6	6	3	4	9	15	0	3	10	21	15	18	8	0	21	1
chr10:52279590-52350007	104559180	104700014	0	0	0	0	0	0	0	0	0	0	0	0	0	0	0	0	0	0	0	0	0	0	0	2	0	0	3	1	0	0	1	0	3	27	2	8	0	9	0	0
chr10:5493792-5496485	5493792	5496485	0	0	0	0	0	0	0	0	0	0	0	0	0	0	0	0	0	0	0	0	0	0	0	0	0	0	0	0	0	0	0	0	0	0	0	3	0	0	0	0
chr10:5495446-5496485	5495446	5496485	0	0	0	0	0	0	0	0	0	0	0	0	0	0	0	0	0	0	0	0	0	0	0	0	0	0	0	0	0	0	0	0	0	0	0	0	0	0	7	0
chr10:5496910-5497081	5496910	5497081	0	0	0	0	0	0	0	0	0	0	0	0	0	0	0	0	0	0	0	0	0	0	0	0	0	0	0	0	3	0	0	0	0	0	0	0	0	0	0	0
chr10:5751492-5754881	5751492	5754881	0	2	0	0	0	0	1	0	0	0	0	0	0	0	0	0	0	0	0	0	0	0	0	0	0	1	0	0	2	0	0	0	0	2	0	0	0	0	0	0
chr10:5754785-5773166	5754785	5773166	0	0	0	0	0	0	0	0	0	0	0	0	0	0	0	0	0	0	0	0	0	0	0	0	0	0	0	0	0	0	0	0	0	0	3	0	0	0	0	0
chr10:5759621-5762933	5759621	5762933	0	0	0	0	0	0	0	0	0	0	0	0	0	0	0	0	0	0	0	0	0	0	0	0	0	1	0	0	0	0	0	6	0	0	0	0	0	0	0	0
chr10:5762506-5769086	5762506	5769086	0	0	0	0	0	0	0	0	0	0	0	0	0	0	0	1	0	0	0	0	0	0	0	0	0	1	0	0	0	0	0	0	0	2	0	1	0	0	1	0
chr10:5772449-5773166	5772449	5773166	0	0	0	0	0	0	0	0	0	0	0	0	0	0	0	0	0	0	0	0	0	0	0	0	0	1	0	0	2	0	0	0	0	0	0	0	0	0	0	0
chr10:5772449-5798701	5772449	5798701	0	0	0	0	0	0	0	0	0	0	0	0	0	0	0	0	0	0	0	0	0	0	0	0	0	0	0	0	0	0	0	0	0	0	2	0	0	0	0	0
chr10:5781580-5782460	11563160	11564920	0	0	0	0	0	0	0	0	0	0	0	0	0	0	0	0	0	0	0	0	0	0	0	0	0	0	0	0	0	0	0	0	0	0	0	0	0	0	0	3
chr10:5784059-5791990	5784059	5791990	0	0	0	0	0	0	0	2	0	0	0	0	0	0	0	1	0	0	0	0	0	0	0	0	0	0	0	0	0	0	0	0	0	0	0	0	0	0	0	0
chr10:5788141-5803434	5788141	5803434	0	0	0	0	0	0	0	0	0	0	0	0	0	0	0	0	0	0	0	0	0	0	0	0	0	0	0	0	0	0	0	0	0	0	0	0	2	0	0	0
chr10:5798575-5803434	5798575	5803434	0	0	0	0	0	0	0	0	0	0	0	0	0	0	0	0	0	0	0	0	0	0	0	0	0	0	0	0	0	0	0	0	0	0	2	0	0	0	0	0
chr10:5799482-5804609	5799482	5804609	0	0	0	0	0	0	0	0	0	0	0	0	0	0	0	0	0	0	0	0	0	0	0	0	0	0	0	0	0	0	0	0	0	0	2	0	0	0	0	0
chr10:5810175-5828013	5810175	5828013	0	0	0	0	0	0	0	0	0	0	0	0	0	0	0	0	0	0	0	0	0	0	0	0	0	0	0	0	0	0	0	0	0	0	0	0	4	0	0	0
chr10:5810175-5842668	5810175	5842668	1	0	0	0	0	0	2	0	0	0	0	0	0	0	0	0	0	0	0	0	1	0	0	0	0	0	0	0	1	0	0	3	3	0	0	4	0	0	0	0
chr10:5815804-5828013	5815804	5828013	0	0	0	0	0	0	1	0	0	0	0	0	0	0	0	0	0	0	0	1	0	0	0	0	0	4	0	0	0	0	0	0	0	0	0	0	0	0	0	0
chr10:5815804-5842668	5815804	5842668	3	2	1	3	2	2	2	2	3	1	1	1	1	0	1	3	0	2	0	0	0	1	2	0	0	3	0	1	1	2	0	2	12	12	1	1	8	0	4	0
chr10:5827104-5842668	5827104	5842668	0	2	1	2	0	1	0	1	1	0	1	0	0	0	0	1	0	3	0	0	0	1	0	0	0	0	0	0	2	0	0	0	0	2	2	0	0	0	0	0
chr10:5827814-5842668	5827814	5842668	0	0	0	1	0	0	0	0	0	0	0	0	0	0	0	0	0	0	0	0	0	0	1	0	0	0	0	0	0	0	0	4	0	0	0	0	0	0	0	0
chr10:5836847-5842668	5836847	5842668	3	4	1	2	1	0	5	2	0	1	1	1	1	0	1	3	0	0	0	2	2	0	0	2	0	1	0	1	5	0	0	0	0	5	12	0	1	0	0	0
chr10:5838725-5842668	5838725	5842668	1	0	0	0	0	0	0	0	0	0	0	0	0	0	0	0	0	0	0	0	0	0	0	1	0	1	0	0	0	2	0	0	0	0	0	1	0	0	0	0
chr10:5944982-5951257	5944982	5951257	0	0	0	0	0	0	0	0	0	0	0	0	0	0	0	0	0	0	0	0	0	0	0	0	0	0	0	0	0	0	0	0	0	6	0	0	0	0	0	0
chr10:5947999-5958419	5947999	5958419	0	0	0	0	0	0	0	0	0	0	0	0	0	0	0	0	0	0	0	0	0	0	0	0	2	0	0	0	0	0	0	0	0	0	0	0	0	0	0	0
chr10:5950887-5953091	5950887	5953091	0	0	0	0	0	0	0	0	0	0	0	0	0	0	0	0	0	0	0	0	0	0	0	0	0	0	0	0	0	2	0	0	0	0	0	0	0	0	0	0
chr10:5955709-5960441	5955709	5960441	0	0	0	0	0	0	0	0	0	0	0	0	0	0	0	0	0	0	0	0	0	0	0	0	0	0	0	0	0	0	0	0	0	0	4	0	0	0	0	0
chr10:5963410-5966471	5963410	5966471	0	0	0	0	0	0	0	0	0	0	0	0	0	0	0	0	0	0	0	0	0	0	0	0	0	0	0	0	2	0	0	0	0	0	0	0	0	0	0	0
chr10:59975905-59997575	59975905	59997575	0	0	0	0	0	0	0	0	0	0	0	0	0	0	0	0	0	0	0	0	0	0	0	0	0	1	0	0	0	0	0	0	4	3	1	3	0	0	0	0
chr10:6001716-6002530	12003432	12005060	0	1	0	0	0	0	0	0	0	0	2	0	0	0	0	0	1	0	1	1	1	0	0	1	0	0	0	2	0	0	0	0	0	6	1	6	0	0	5	0
chr10:6139010-6157274	6139010	6157274	0	0	0	0	0	0	0	0	0	0	0	0	0	0	0	0	0	0	0	0	0	0	0	0	0	0	0	0	0	2	0	0	0	0	0	0	0	0	0	0
chr10:61564177-61612460	61564177	61612460	0	0	0	0	0	0	0	0	0	0	0	0	0	0	0	0	0	0	0	0	0	0	0	0	0	0	0	0	0	0	0	0	5	0	0	0	0	0	0	0
chr10:62539898-62545545	62539898	62545545	0	0	0	0	0	0	0	0	0	0	0	0	0	0	0	0	0	0	0	0	0	0	0	0	0	0	0	0	0	0	0	0	0	0	0	2	0	0	0	0
chr10:6255585-6261656	6255585	6261656	0	0	0	0	0	0	0	0	0	0	0	0	0	0	0	0	0	0	0	0	0	0	0	0	0	0	0	0	0	0	0	0	0	0	0	2	0	0	0	0
chr10:64928194-64944498	64928194	64944498	0	0	0	0	0	0	0	0	0	0	0	0	0	0	0	0	0	0	0	0	0	0	0	0	0	0	0	0	0	0	0	0	0	0	0	0	4	0	0	0
chr10:64928194-64957323	64928194	64957323	0	0	0	0	0	0	0	0	0	0	0	0	0	0	0	0	0	0	0	0	0	0	0	0	0	0	0	0	0	0	0	0	0	0	6	0	0	0	0	0
chr10:64928194-64968995	64928194	64968995	0	0	0	0	0	0	0	0	0	0	0	0	0	0	0	0	0	0	0	0	0	0	0	0	0	0	0	0	1	1	0	0	2	2	2	1	0	0	0	0
chr10:64936056-64936233	64936056	64936233	0	0	0	0	0	0	0	0	0	0	0	0	0	0	0	0	0	0	0	0	0	0	0	0	0	0	0	0	2	0	0	0	0	0	0	0	0	0	0	0
chr10:64936056-64937616	64936056	64937616	0	0	0	0	0	0	0	0	0	0	0	0	1	0	0	0	0	0	0	0	0	0	0	0	0	1	0	2	3	0	0	0	0	4	1	1	5	0	0	0
chr10:64936056-64943329	64936056	64943329	0	0	0	0	0	0	0	0	0	0	0	0	0	0	0	0	0	0	0	0	0	0	0	0	0	0	0	0	0	0	0	0	0	0	7	0	0	0	0	0
chr10:64936056-64944498	64936056	64944498	0	0	0	0	0	0	0	0	0	0	0	0	0	0	0	0	0	0	0	0	0	0	0	2	0	0	0	0	0	0	0	0	0	2	0	2	0	0	0	0
chr10:64936056-64945413	64936056	64945413	0	0	0	0	0	0	0	0	0	0	0	0	0	0	0	0	0	0	0	0	0	0	0	0	0	0	0	0	0	4	0	0	0	0	0	0	0	0	0	0
chr10:64936056-64946143	64936056	64946143	0	0	0	0	0	0	0	0	0	0	0	0	0	0	0	0	0	0	0	0	0	0	0	0	0	1	0	0	0	0	0	0	3	0	1	0	0	0	0	0
chr10:64936056-64949206	64936056	64949206	0	0	0	0	0	0	0	0	0	0	0	0	0	0	0	0	0	0	0	0	0	0	0	0	0	0	0	0	0	7	0	0	0	0	0	1	0	0	0	0
chr10:64936056-64954135	64936056	64954135	0	0	0	0	0	0	0	0	0	0	0	0	0	0	0	0	0	0	0	0	0	0	0	0	0	0	0	1	0	2	0	0	0	0	0	0	0	0	0	0
chr10:64936056-64957323	64936056	64957323	0	0	0	0	0	0	0	0	0	0	0	0	0	0	0	0	0	0	0	0	0	0	0	0	2	1	0	0	2	0	6	0	0	0	8	2	0	0	0	0
chr10:64936056-64960437	64936056	64960437	0	0	0	0	0	0	0	0	0	0	0	0	0	0	0	0	0	1	0	0	0	0	0	0	2	0	0	0	0	0	0	0	0	0	0	2	0	0	0	0
chr10:64936056-64968995	64936056	64968995	0	0	0	0	0	0	0	0	0	0	0	0	0	0	0	0	0	0	0	0	0	1	0	0	0	1	0	0	5	0	0	0	7	10	7	3	0	0	0	0
chr10:64936056-64975215	64936056	64975215	0	0	0	0	0	0	0	0	0	0	0	0	0	0	0	0	0	0	0	0	0	0	0	0	0	0	0	0	0	0	0	0	3	0	0	0	0	0	0	0
chr10:64936056-64977091	64936056	64977091	0	0	0	0	0	0	0	0	0	0	0	0	0	0	0	0	0	0	0	0	0	0	0	0	0	0	0	0	0	0	0	0	7	5	0	0	0	0	0	0
chr10:64936056-65024524	64936056	65024524	0	0	0	0	0	0	0	0	0	0	0	0	0	0	0	0	0	0	0	0	0	0	0	0	0	2	0	0	0	2	0	0	0	0	0	0	0	0	0	0
chr10:64937476-64968995	64937476	64968995	0	0	0	0	0	0	0	0	0	0	1	0	0	0	0	0	0	0	0	0	0	0	0	0	0	0	0	0	0	3	0	0	0	0	1	0	0	0	0	0
chr10:64943206-64954135	64943206	64954135	0	0	0	0	0	0	0	0	0	0	0	0	0	0	0	0	0	0	0	0	0	0	0	0	0	0	0	0	2	0	0	0	0	0	0	0	0	0	0	0
chr10:64943206-64957323	64943206	64957323	0	0	0	0	0	0	0	0	0	0	0	0	0	0	0	0	0	0	0	0	0	0	0	0	0	0	0	0	0	0	0	0	0	4	0	0	0	0	4	0
chr10:64944367-64949206	64944367	64949206	0	0	0	0	0	0	0	0	0	0	0	0	0	0	0	0	0	0	0	0	0	0	0	0	0	0	0	1	0	0	0	0	0	0	0	0	0	0	2	0
chr10:64944367-64954135	64944367	64954135	0	0	1	0	0	0	0	0	0	0	0	0	0	0	0	0	0	1	0	0	0	0	0	1	0	0	1	0	2	0	0	3	2	0	2	0	0	0	0	0
chr10:64944367-64968995	64944367	64968995	0	0	0	0	0	0	0	0	0	0	0	0	0	0	0	0	0	0	0	0	0	1	0	0	0	0	0	0	0	0	0	0	0	0	3	0	0	0	5	0
chr10:64944367-64977091	64944367	64977091	0	0	0	0	0	0	0	0	0	0	0	0	0	0	0	0	0	0	0	0	0	0	0	0	0	0	0	0	1	0	0	0	3	5	0	0	0	0	0	0
chr10:64945322-64968995	64945322	64968995	0	0	0	0	0	0	0	0	0	0	0	0	0	0	0	0	0	0	0	0	0	0	0	0	0	0	0	0	0	0	0	0	0	3	0	0	0	0	0	0
chr10:64945974-64954135	64945974	64954135	0	0	0	0	0	0	0	0	0	0	0	0	0	0	0	0	0	0	0	0	0	0	0	0	0	0	0	0	0	0	0	0	0	0	2	0	0	0	0	0
chr10:64945974-64968995	64945974	64968995	0	0	0	0	0	0	0	0	0	0	0	0	0	0	0	0	0	0	0	0	0	0	0	0	0	0	0	0	2	0	0	0	0	0	1	0	0	0	0	0
chr10:64945974-64977091	64945974	64977091	0	0	0	0	0	0	0	0	0	0	0	0	0	0	0	0	0	0	0	0	0	0	0	0	0	0	0	0	0	0	0	0	0	0	0	0	2	0	0	0
chr10:64948927-64957323	64948927	64957323	0	0	0	0	0	0	0	0	0	0	0	0	0	0	0	0	0	0	0	0	0	0	0	0	0	0	0	0	0	0	0	0	0	6	0	1	0	0	0	0
chr10:64948927-64958487	64948927	64958487	0	0	0	0	0	0	0	0	0	0	0	0	0	0	0	0	0	0	0	0	0	0	0	0	0	0	0	0	0	5	0	0	0	0	0	0	0	0	0	0
chr10:64948927-64968995	64948927	64968995	0	0	0	0	0	0	0	0	0	0	0	0	0	0	0	0	0	0	0	0	0	0	0	0	0	0	0	0	0	6	0	0	0	0	1	4	0	0	0	0
chr10:64950653-64954135	64950653	64954135	0	0	0	0	0	0	0	0	0	0	0	0	0	0	0	0	2	0	0	0	0	1	1	0	0	0	0	1	0	0	0	0	0	4	2	1	0	0	0	0
chr10:64950653-64968995	64950653	64968995	0	0	0	0	0	0	0	0	0	0	0	0	0	0	0	0	0	0	0	0	0	0	0	0	0	0	0	0	1	0	0	0	0	4	2	0	0	0	0	0
chr10:64950653-64979743	64950653	64979743	0	0	0	0	0	0	0	0	0	0	0	0	0	0	0	0	0	0	0	0	0	0	0	0	0	0	0	0	0	1	0	0	0	3	0	0	0	0	0	0
chr10:64952697-64953232	64952697	64953232	0	0	0	0	0	0	0	0	0	0	0	0	0	0	0	0	0	0	0	0	0	0	0	0	0	0	0	0	0	0	0	0	0	0	0	2	0	0	0	0
chr10:64952697-64957323	64952697	64957323	0	0	0	0	0	0	0	0	0	0	0	0	0	0	0	0	0	0	0	0	0	0	0	0	0	0	0	0	0	0	0	0	0	0	0	0	3	0	0	0
chr10:64953104-64957323	64953104	64957323	0	0	0	0	0	0	0	0	0	0	0	0	0	0	0	0	0	0	0	0	0	1	0	0	0	0	0	0	0	0	0	0	0	0	4	0	0	0	0	0
chr10:64954045-64968995	64954045	64968995	0	0	0	0	0	0	0	0	0	0	0	0	0	0	0	0	0	0	0	0	0	0	0	0	0	0	1	0	0	0	0	0	6	0	0	2	0	0	0	0
chr10:64957170-64960437	64957170	64960437	0	0	0	0	0	0	0	0	0	0	0	0	0	0	0	0	0	0	0	0	0	0	0	0	1	0	0	0	0	0	0	0	0	0	0	4	0	0	0	0
chr10:64957170-64968995	64957170	64968995	0	0	0	0	0	0	0	0	0	0	0	0	0	0	0	0	0	0	0	0	0	0	0	0	0	0	1	0	0	13	0	0	0	1	0	0	0	0	0	0
chr10:64957170-64977091	64957170	64977091	0	0	0	0	0	0	0	0	0	0	0	0	0	0	0	0	0	0	0	0	0	0	0	0	0	0	0	0	0	0	0	0	0	0	4	1	0	0	0	0
chr10:64960235-64968995	64960235	64968995	0	0	0	0	0	0	0	0	0	0	0	0	0	0	0	0	0	0	0	0	0	0	0	1	0	0	0	0	0	0	7	0	1	0	0	0	0	0	0	0
chr10:64966354-64968561	64966354	64968561	0	0	0	0	0	0	0	0	0	0	0	0	0	0	0	0	0	0	0	0	0	0	0	0	0	0	0	0	2	4	0	0	0	0	0	0	0	0	0	0
chr10:64966354-64968995	64966354	64968995	0	0	0	0	0	0	0	0	0	0	0	0	0	0	2	0	1	0	0	1	3	2	1	0	0	4	0	1	2	0	0	2	2	6	6	2	6	0	0	0
chr10:64966354-64977091	64966354	64977091	0	0	0	0	0	0	0	0	0	0	0	0	0	0	0	0	0	0	0	0	0	0	0	0	0	0	0	1	0	0	0	0	0	3	0	0	0	0	0	0
chr10:64973232-64977091	64973232	64977091	0	0	0	0	0	0	0	0	0	0	0	0	0	0	0	0	0	0	0	0	0	0	0	0	0	0	0	0	3	0	0	0	1	9	0	0	0	0	0	0
chr10:64973232-64979743	64973232	64979743	0	0	0	0	0	0	0	0	0	0	0	0	0	0	0	0	0	0	0	0	0	0	0	0	0	0	0	0	0	0	0	0	0	0	2	0	0	0	2	0
chr10:64979637-65024524	64979637	65024524	0	0	0	0	0	0	0	0	0	0	0	0	0	0	0	0	0	0	0	0	0	0	0	0	0	0	0	0	0	0	0	0	3	0	0	0	0	0	0	0
chr10:65140077-65140242	65140077	65140242	0	0	0	0	0	0	0	0	0	1	0	0	0	0	0	0	1	0	1	0	0	0	0	0	0	1	2	2	5	0	0	0	9	1	16	0	0	0	0	0
chr10:65354537-65370094	65354537	65370094	0	0	0	0	0	0	0	0	0	0	0	0	0	0	0	0	0	0	0	0	0	0	0	0	0	0	0	0	2	0	0	0	0	0	0	0	0	0	0	0
chr10:65354537-65379560	65354537	65379560	0	0	0	0	0	0	0	0	0	0	0	0	0	0	0	0	0	0	0	0	0	0	0	0	0	0	0	0	0	0	0	0	0	0	0	0	2	0	0	0
chr10:65369946-65379560	65369946	65379560	0	0	0	0	0	0	0	0	0	0	0	0	0	0	0	0	1	0	0	0	0	0	0	0	0	0	1	0	2	0	0	0	1	0	4	0	1	0	0	0
chr10:65444681-65445066	65444681	65445066	0	0	0	0	0	0	0	0	0	0	0	0	0	0	0	0	0	0	0	0	0	0	0	0	0	0	0	1	2	0	0	0	0	0	0	0	0	0	0	0
chr10:69647174-69648881	69647174	69648881	0	0	0	0	0	0	0	0	0	0	0	0	0	0	0	0	0	0	0	0	0	0	0	0	0	3	0	0	0	0	0	0	0	3	0	3	0	0	0	0
chr10:69647174-69651312	69647174	69651312	0	0	0	0	0	0	0	0	0	0	0	0	0	1	0	1	0	0	0	0	0	0	0	0	0	0	0	0	1	0	0	0	2	9	2	2	0	0	2	0
chr10:69647174-69666694	69647174	69666694	0	0	0	0	0	0	0	0	0	0	0	0	0	0	0	0	0	0	0	0	0	0	0	0	3	0	0	1	0	4	0	0	0	3	0	1	0	1	0	0
chr10:69647174-69667882	69647174	69667882	0	0	0	0	0	0	0	0	0	0	0	0	0	0	0	0	0	0	0	0	0	0	0	0	0	0	0	0	0	0	0	0	0	0	0	2	0	0	0	0
chr10:69648639-69651312	69648639	69651312	0	0	0	0	0	0	0	0	0	0	0	0	0	0	0	0	0	0	0	0	0	1	0	0	0	0	1	0	0	0	0	0	0	0	3	0	0	0	0	0
chr10:69648639-69666694	69648639	69666694	0	0	0	0	0	0	0	0	0	0	0	0	0	0	0	0	0	0	0	0	0	0	0	0	0	0	0	0	0	0	0	0	0	2	0	0	0	0	0	0
chr10:69651159-69651312	69651159	69651312	0	0	0	0	0	0	0	0	0	0	0	0	0	0	0	0	0	0	0	0	0	0	0	0	0	0	0	0	0	0	0	0	0	0	4	0	0	0	0	0
chr10:69651159-69669199	69651159	69669199	0	0	0	0	0	0	0	0	0	0	0	0	0	0	0	0	0	0	0	0	0	0	0	0	0	0	0	0	0	0	0	0	4	0	0	0	0	0	0	0
chr10:69665919-69667882	69665919	69667882	0	0	0	0	0	0	0	0	0	0	0	0	0	0	0	0	0	0	0	0	0	0	0	0	0	0	0	0	0	0	0	0	0	0	0	0	0	0	5	0
chr10:69667802-69672788	69667802	69672788	0	0	0	0	0	0	0	0	0	0	0	0	0	0	0	0	0	0	0	0	0	0	0	0	0	0	0	0	0	0	0	0	5	0	0	0	0	0	0	0
chr10:69692353-69716733	69692353	69716733	0	0	0	0	0	0	0	0	0	0	0	0	0	0	0	0	0	0	0	0	0	0	0	0	0	0	0	0	0	0	0	2	0	0	0	0	0	0	0	0
chr10:69695909-69716733	69695909	69716733	0	0	0	0	0	0	0	0	0	0	0	0	0	0	0	0	0	0	0	0	0	0	0	0	0	0	0	0	3	0	0	0	0	0	0	0	0	0	0	0
chr10:69714351-69726559	69714351	69726559	0	0	0	0	0	0	0	0	0	0	0	0	0	0	1	0	1	0	0	0	0	0	0	0	0	0	0	0	0	0	0	0	0	0	2	0	0	0	0	0
chr10:69726439-69752439	69726439	69752439	0	0	0	0	0	0	0	0	0	0	0	0	0	0	0	0	0	0	1	0	0	0	0	0	0	0	0	1	0	0	0	0	0	7	4	0	0	0	0	0
chr10:69726439-69785433	69726439	69785433	0	0	0	0	0	0	0	0	0	0	0	0	0	0	0	0	0	0	0	0	0	0	0	0	0	0	0	0	1	0	0	0	0	3	0	0	0	0	0	0
chr10:69748419-69773943	69748419	69773943	1	2	0	1	0	0	0	0	0	1	0	0	0	0	0	0	0	0	0	0	0	0	0	0	0	0	0	0	0	0	0	0	3	2	0	0	0	0	0	0
chr10:69785302-69833443	69785302	69833443	0	0	0	0	0	0	0	0	0	0	0	0	0	0	0	0	0	0	0	0	0	0	0	0	0	0	0	0	0	0	0	0	0	0	0	0	0	0	3	0
chr10:69792534-69804320	69792534	69804320	0	0	0	0	0	0	0	0	0	0	0	0	0	0	0	0	0	0	0	0	0	0	0	0	0	0	0	0	0	0	0	0	0	0	0	2	0	0	0	0
chr10:69797849-69804320	69797849	69804320	0	0	0	0	0	0	0	0	0	0	0	0	0	0	0	0	0	0	0	0	0	0	0	0	0	0	0	0	0	0	0	0	0	2	0	0	0	0	0	0
chr10:69832639-69833443	69832639	69833443	0	0	0	0	0	0	0	0	0	0	0	0	0	0	0	0	0	0	0	0	0	0	0	0	0	0	0	0	0	0	0	0	0	2	0	0	0	0	0	0
chr10:69902696-69905283	69902696	69905283	0	0	0	0	0	0	0	0	0	0	0	0	0	0	0	0	0	0	0	0	0	0	0	0	0	0	0	0	2	0	0	0	0	0	0	0	0	0	0	0
chr10:70096955-70101066	70096955	70101066	0	0	0	0	0	0	0	0	0	0	0	0	0	0	0	0	0	0	0	0	0	0	0	0	0	0	0	0	2	0	0	0	0	4	0	0	7	0	0	0
chr10:70096955-70101437	70096955	70101437	0	0	0	0	0	0	0	0	0	0	0	0	0	0	0	0	0	0	0	0	0	0	0	0	0	0	0	1	2	0	0	0	5	3	0	1	0	0	0	0
chr10:70096955-70101608	70096955	70101608	0	0	0	0	0	0	0	0	0	0	0	0	0	0	0	0	0	0	0	0	0	0	0	0	0	2	0	0	0	0	0	1	0	13	0	3	0	0	0	0
chr10:70098259-70098983	70098259	70098983	0	0	0	0	0	0	0	0	0	0	0	0	0	0	0	0	0	0	0	0	0	0	0	0	0	0	0	0	0	0	0	0	0	4	0	0	0	0	0	0
chr10:70098259-70099312	70098259	70099312	0	0	0	0	0	0	0	0	0	0	0	0	0	0	0	0	0	0	0	0	0	0	0	0	0	0	0	0	0	0	0	3	0	0	0	2	0	0	0	0
chr10:70098259-70101608	70098259	70101608	0	0	0	0	0	0	0	0	0	0	0	0	0	0	0	0	0	0	0	0	0	0	0	1	0	0	0	0	0	0	0	0	0	0	2	0	0	0	0	0
chr10:70098896-70101437	70098896	70101437	0	0	0	0	0	0	0	0	0	0	0	0	0	0	0	0	0	0	0	0	1	0	0	0	1	0	0	0	0	3	0	0	0	2	1	2	0	0	0	0
chr10:70098896-70101608	140197792	140203216	0	0	0	0	0	0	0	0	0	0	0	0	0	0	0	0	0	0	0	0	0	0	0	0	0	0	0	0	0	0	0	0	8	2	0	1	0	0	0	0
chr10:70099196-70101608	70099196	70101608	0	0	0	0	0	0	0	0	0	0	0	0	0	0	0	0	0	0	0	0	0	0	0	0	0	0	0	0	1	5	0	0	0	0	0	2	0	0	3	0
chr10:70100930-70101437	70100930	70101437	0	0	0	0	0	0	0	0	0	0	0	0	0	0	0	0	0	0	0	0	0	0	0	0	0	0	0	0	0	0	0	0	0	0	0	1	5	0	0	0
chr10:70100930-70101608	140201860	140203216	0	0	0	0	0	0	0	0	0	0	0	0	0	0	0	0	0	0	0	0	0	0	0	0	1	1	0	4	1	0	9	0	16	15	10	13	6	5	3	0
chr10:70101341-70101608	70101341	70101608	0	0	0	0	0	0	0	0	0	0	0	0	0	0	0	0	0	0	0	0	0	0	0	0	0	0	0	0	0	3	0	0	2	3	0	0	0	0	0	0
chr10:70115109-70145885	70115109	70145885	1	0	0	0	0	0	0	0	0	0	0	0	0	0	0	0	0	0	0	0	0	0	0	0	1	0	0	0	0	0	0	1	2	0	0	0	1	0	0	0
chr10:70115109-70164601	70115109	70164601	0	0	0	0	0	0	0	0	0	0	0	0	0	0	0	0	0	0	0	0	0	0	0	0	0	0	0	0	0	0	0	0	0	3	0	0	0	0	0	0
chr10:70136609-70164601	70136609	70164601	0	0	0	0	0	0	0	0	0	0	0	0	0	0	0	0	0	0	0	0	0	0	0	0	0	0	0	0	0	0	0	0	0	0	0	0	2	0	0	0
chr10:70140988-70152960	70140988	70152960	0	0	0	0	0	0	0	0	0	0	0	0	0	0	0	0	0	0	0	0	0	0	0	0	0	0	1	1	0	0	0	0	0	1	3	0	0	0	0	0
chr10:70140988-70153893	70140988	70153893	0	0	0	0	0	0	0	0	0	0	0	0	0	0	0	0	0	0	0	0	0	0	0	0	0	0	0	0	0	3	0	0	0	0	0	0	0	0	0	0
chr10:70152894-70156638	70152894	70156638	0	0	0	0	0	0	0	0	0	0	0	0	0	0	0	0	0	0	0	0	0	0	0	0	3	0	0	0	0	0	0	0	0	0	3	4	0	0	0	0
chr10:70152894-70161494	70152894	70161494	0	0	0	0	0	0	0	0	0	0	0	0	0	0	1	0	0	0	1	0	0	0	1	0	0	0	0	0	1	0	0	1	0	1	0	0	2	0	0	0
chr10:70152894-70164601	70152894	70164601	0	0	0	0	0	0	0	0	0	0	0	0	0	0	0	0	0	0	0	0	0	0	0	0	0	0	0	0	0	0	0	0	4	0	0	1	0	0	0	0
chr10:70153831-70154208	70153831	70154208	0	0	0	0	0	0	0	0	1	0	0	0	0	0	0	0	0	0	0	0	0	0	0	0	0	0	0	0	0	0	18	0	0	0	0	0	0	0	0	0
chr10:70181981-70182647	70181981	70182647	0	0	0	0	0	0	0	0	1	0	0	0	0	0	0	0	0	0	0	0	0	0	0	0	0	0	0	0	0	0	0	0	0	0	2	0	0	0	1	0
chr10:70190192-70229920	70190192	70229920	0	0	0	0	0	0	1	0	0	1	0	0	0	0	0	1	0	0	0	1	0	0	0	0	0	0	0	0	0	0	0	0	0	0	0	3	1	0	0	0
chr10:70196767-70229920	70196767	70229920	0	0	1	1	0	0	0	0	1	0	0	0	0	0	0	1	0	0	0	1	0	1	0	1	0	0	1	0	4	4	4	0	2	0	2	0	1	0	0	0
chr10:70202673-70206170	70202673	70206170	0	0	0	0	0	0	0	0	0	0	0	0	0	0	0	0	0	0	0	0	0	0	0	0	0	0	0	0	0	0	0	0	0	2	0	0	0	0	0	0
chr10:70202673-70210004	70202673	70210004	0	0	0	0	0	0	0	1	0	0	0	1	0	0	0	0	0	0	0	0	0	0	0	0	0	0	0	0	2	0	0	0	0	0	0	0	0	0	0	0
chr10:70202673-70229920	70202673	70229920	0	0	0	0	0	0	0	0	0	0	0	0	0	0	0	0	0	2	0	0	0	0	1	0	0	0	0	0	0	0	0	0	2	3	6	0	0	0	0	0
chr10:70209784-70225569	70209784	70225569	0	0	0	0	1	0	0	0	0	0	0	0	1	0	0	0	0	0	0	0	0	0	1	0	0	0	0	0	0	0	0	0	0	8	3	3	1	0	0	0
chr10:70218860-70229920	70218860	70229920	3	1	2	1	4	1	2	3	1	1	3	1	0	0	6	3	1	2	2	3	0	1	0	1	0	1	0	0	0	1	0	0	0	6	10	0	0	0	0	0
chr10:70225423-70229920	70225423	70229920	0	0	0	0	0	0	0	0	0	0	0	0	0	0	0	0	0	0	0	1	0	0	0	0	0	0	0	0	0	3	0	0	0	0	0	0	0	0	0	0
chr10:70227879-70229920	140455758	140459840	3	2	3	4	2	1	4	3	1	2	1	0	2	2	4	7	5	2	4	3	1	2	2	2	0	1	0	4	1	0	0	0	0	19	9	8	0	0	3	0
chr10:70246900-70253327	70246900	70253327	1	0	0	0	0	4	1	0	0	1	0	1	1	2	0	0	0	0	0	1	0	0	0	0	0	0	0	1	0	0	0	0	0	0	0	0	0	0	0	0
chr10:70246900-70266475	70246900	70266475	0	0	0	0	0	0	0	2	0	0	1	0	1	0	0	2	0	0	0	0	0	0	0	0	2	0	0	0	0	0	0	0	0	0	0	0	0	0	0	0
chr10:70496632-70502326	70496632	70502326	0	0	0	0	0	0	0	0	0	0	0	0	0	0	0	0	0	0	0	0	0	0	0	0	0	0	0	0	0	0	0	0	6	0	0	0	0	0	0	0
chr10:70496632-70507323	70496632	70507323	0	0	0	0	0	0	0	0	0	0	0	0	0	0	0	0	0	0	0	0	0	0	0	0	0	0	0	0	0	0	0	0	0	0	3	0	0	0	0	0
chr10:70496632-70509442	70496632	70509442	0	0	0	0	0	0	0	0	0	0	0	0	0	0	0	0	0	0	1	0	0	0	0	0	0	0	0	0	0	0	0	0	0	0	4	0	0	0	0	0
chr10:70497601-70502326	70497601	70502326	1	0	2	0	0	0	1	0	0	0	0	0	0	0	0	0	0	1	1	0	3	1	1	0	0	0	0	2	2	3	0	0	0	10	0	0	0	0	0	0
chr10:70497601-70507323	70497601	70507323	0	0	1	0	0	0	0	0	0	0	0	0	0	1	0	0	0	0	0	0	0	0	0	0	0	0	0	0	0	0	0	0	0	7	1	0	0	0	0	0
chr10:70513608-70532856	70513608	70532856	1	1	2	2	1	0	2	0	1	1	1	2	0	0	0	0	1	2	0	0	0	1	2	0	0	1	0	0	0	0	0	3	0	0	0	0	0	0	0	0
chr10:70515126-70525836	70515126	70525836	0	0	0	0	0	0	0	0	0	0	0	0	0	0	0	0	0	0	0	0	0	0	0	0	0	0	0	0	0	0	0	0	5	0	0	0	0	0	0	0
chr10:70517050-70532856	70517050	70532856	0	0	0	0	0	0	0	0	0	0	0	0	0	0	0	0	0	0	1	0	0	0	0	1	0	0	0	1	0	2	0	0	3	0	13	0	3	0	0	0
chr10:70520763-70532856	141041526	141065712	0	0	0	0	0	0	0	0	0	0	0	0	0	0	0	0	0	0	0	0	0	0	0	0	0	1	0	0	0	0	0	0	6	0	0	0	3	0	0	0
chr10:70525644-70546449	70525644	70546449	0	0	0	0	0	0	0	0	0	0	0	0	0	0	0	0	0	0	0	0	0	0	0	0	0	0	0	0	0	0	0	0	0	0	0	0	3	0	0	0
chr10:70530962-70532856	70530962	70532856	1	0	0	0	0	0	0	0	0	0	0	0	0	0	0	0	1	1	0	0	0	0	0	0	0	0	0	0	2	4	0	0	4	0	0	2	0	0	0	0
chr10:70545892-70549672	70545892	70549672	0	0	0	0	0	0	0	0	1	0	0	0	0	0	0	0	0	0	0	0	0	1	0	0	0	0	0	0	0	0	0	0	3	3	0	1	0	0	0	0
chr10:70547683-70548085	70547683	70548085	0	0	0	0	0	0	0	0	0	0	1	0	0	0	0	2	0	0	0	0	0	0	0	0	2	0	0	1	0	0	0	0	0	0	2	6	0	0	0	0
chr10:70547683-70549672	70547683	70549672	0	0	0	0	0	0	0	0	0	0	0	0	0	0	1	0	0	0	0	0	0	0	0	0	0	0	0	0	0	0	0	0	0	0	2	0	0	0	0	0
chr10:70696691-70703013	70696691	70703013	0	0	0	0	0	0	0	0	0	0	0	0	0	0	0	0	0	0	0	0	1	0	0	0	0	0	0	0	0	0	0	0	0	4	0	0	0	0	0	0
chr10:70719561-70720005	141439122	141440010	0	1	1	3	1	1	1	1	2	0	3	2	2	0	1	1	1	5	1	0	1	4	1	1	2	3	1	3	2	0	0	0	11	14	9	5	15	0	10	0
chr10:70719561-70721913	70719561	70721913	0	0	0	0	1	0	0	0	0	0	0	1	0	0	0	0	0	0	0	1	0	1	0	0	0	0	0	0	3	1	0	0	11	13	1	1	2	0	7	0
chr10:70719561-70723225	70719561	70723225	0	0	0	0	0	0	0	0	0	1	1	0	0	0	0	0	0	1	1	0	0	0	0	0	0	0	0	0	0	0	0	0	1	0	0	2	0	0	0	0
chr10:70719561-70725250	70719561	70725250	0	0	0	0	0	0	0	0	0	0	0	0	0	0	0	0	0	0	0	0	0	0	0	0	0	0	0	0	0	0	0	0	0	0	3	1	0	0	0	0
chr10:70719561-70726959	70719561	70726959	0	0	0	0	0	0	0	0	1	0	0	0	0	0	0	0	0	0	0	0	0	0	0	1	3	1	0	0	2	0	7	0	0	3	2	0	0	0	0	0
chr10:70723046-70726959	70723046	70726959	0	0	0	0	0	0	0	0	0	0	0	0	0	0	0	0	0	0	0	0	0	0	0	0	0	0	0	0	0	0	0	0	0	3	3	0	0	0	0	0
chr10:70892653-70892803	70892653	70892803	0	0	0	0	0	0	0	0	0	0	0	0	0	0	0	0	0	0	0	0	0	0	0	0	0	0	0	0	0	2	0	0	0	0	0	0	0	0	0	0
chr10:70892653-70925866	70892653	70925866	0	0	0	0	0	0	0	0	0	0	0	0	0	0	0	0	0	0	0	0	0	0	0	0	0	0	0	0	0	1	0	0	0	0	2	0	0	0	0	0
chr10:70915567-70917967	70915567	70917967	0	0	0	0	0	0	0	0	0	0	0	0	0	0	0	0	0	0	0	0	0	1	1	0	2	2	0	0	2	0	9	0	4	1	2	4	0	0	3	0
chr10:70915567-70922268	70915567	70922268	0	0	0	0	0	0	0	0	0	0	0	0	0	0	0	0	0	0	0	0	0	0	0	0	0	1	0	0	0	0	0	0	0	0	4	0	0	0	0	0
chr10:70915567-70925866	70915567	70925866	1	0	0	0	0	0	0	0	0	0	0	0	0	0	0	0	0	0	0	0	0	0	0	0	0	0	0	0	0	0	15	0	0	0	0	0	0	0	0	0
chr10:70915567-70928387	70915567	70928387	0	0	0	0	0	0	0	0	0	0	0	0	0	0	0	0	0	0	0	0	0	0	0	0	0	0	0	0	0	0	0	0	0	3	0	0	0	0	0	0
chr10:70916762-70917967	70916762	70917967	0	0	0	0	0	0	0	0	0	0	0	0	0	0	0	0	0	0	0	0	0	0	0	0	0	0	0	0	0	3	0	0	0	0	0	0	0	0	0	0
chr10:70947397-70955021	70947397	70955021	0	0	0	0	0	0	0	0	0	0	0	0	0	0	0	0	0	0	0	0	0	0	0	0	0	0	0	0	0	0	0	0	4	0	0	0	0	0	0	0
chr10:70958127-70962799	70958127	70962799	0	0	0	0	0	0	0	0	0	0	0	0	0	0	0	0	0	0	0	0	0	1	0	0	0	0	0	0	0	0	0	0	2	1	0	0	1	0	0	0
chr10:70960035-70962799	70960035	70962799	0	0	0	0	0	0	0	0	0	0	0	0	0	0	0	0	0	0	0	0	0	0	0	0	0	0	0	0	0	0	0	0	0	0	3	0	0	0	0	0
chr10:71042284-71055436	71042284	71055436	0	0	0	0	0	0	0	0	0	0	0	0	0	0	0	0	0	0	0	0	0	0	0	0	0	0	0	0	0	0	0	0	0	0	0	2	0	0	0	0
chr10:71119652-71129380	71119652	71129380	0	0	1	0	0	0	0	0	0	0	0	1	0	0	0	0	0	0	0	0	1	0	0	1	3	1	1	0	1	3	0	0	5	2	5	0	0	2	0	0
chr10:71124538-71129380	71124538	71129380	0	0	0	0	0	0	0	0	0	0	1	0	0	0	0	0	0	0	0	0	1	0	1	1	0	1	2	0	3	0	0	6	0	3	5	4	4	0	0	0
chr10:71124538-71139851	71124538	71139851	0	0	0	0	0	0	0	0	0	0	0	0	1	0	0	0	0	1	0	0	0	0	0	0	0	0	0	0	0	0	0	0	0	0	0	0	0	0	0	10
chr10:71136689-71139851	71136689	71139851	0	0	0	0	0	0	0	0	0	0	0	0	0	0	0	0	0	0	1	0	0	0	0	1	0	2	0	0	1	0	0	0	0	3	0	0	0	0	0	0
chr10:71142242-71146174	71142242	71146174	0	0	0	1	0	0	0	0	0	0	0	0	0	0	0	0	0	0	1	0	0	0	0	0	0	0	0	1	0	0	0	0	3	0	0	0	0	0	0	0
chr10:71142242-71149052	71142242	71149052	0	0	0	0	0	0	0	0	0	0	0	0	0	0	0	0	0	0	0	0	0	0	0	0	0	0	0	0	0	0	0	0	0	0	0	0	0	0	5	0
chr10:71151880-71154861	71151880	71154861	0	0	0	0	0	0	0	0	0	0	0	0	0	0	0	0	0	0	1	0	0	0	1	0	0	0	0	0	0	0	0	0	3	0	0	0	0	0	0	0
chr10:71151880-71158584	71151880	71158584	0	0	0	0	0	0	1	0	0	0	0	0	0	0	0	0	0	0	0	0	0	0	0	0	2	0	0	0	0	0	0	0	0	3	0	1	0	0	0	0
chr10:71968960-71977687	71968960	71977687	0	0	0	0	0	0	0	0	0	0	0	0	0	0	0	0	0	0	0	0	0	0	0	0	0	2	0	0	0	0	0	0	0	0	0	0	0	0	0	0
chr10:7262372-7327916	7262372	7327916	2	0	1	0	0	0	1	0	0	0	0	0	0	0	2	0	1	0	0	0	0	0	0	0	0	0	0	0	0	0	0	0	0	0	0	0	0	0	0	0
chr10:7285519-7327916	7285519	7327916	3	4	2	1	2	0	0	0	0	2	1	0	1	1	0	1	0	0	0	0	1	0	0	0	0	0	0	0	1	0	0	0	0	0	4	0	0	0	0	0
chr10:7318853-7327916	7318853	7327916	1	1	0	1	0	0	0	0	0	1	1	0	0	0	0	1	0	0	1	0	0	0	0	0	0	0	0	0	0	2	0	0	0	0	0	0	0	0	0	0
chr10:7318853-7423911	7318853	7423911	0	0	0	0	0	0	0	0	0	0	0	0	0	0	0	0	0	0	0	0	2	0	0	0	0	1	0	0	0	0	0	0	0	0	0	0	0	0	0	0
chr10:73887839-73912746	73887839	73912746	0	0	0	1	0	0	0	0	0	0	0	0	0	0	0	0	0	0	0	0	0	0	0	0	0	0	0	0	0	0	0	3	0	0	0	0	0	0	0	0
chr10:73956568-73973089	73956568	73973089	0	1	0	0	0	0	0	0	0	0	0	0	0	0	0	0	0	0	0	0	0	0	0	0	0	0	2	0	2	0	0	1	0	1	4	3	0	0	0	0
chr10:7409610-7423911	7409610	7423911	0	1	0	0	0	0	0	0	0	0	1	0	0	0	0	0	0	0	3	0	0	0	0	0	0	0	0	1	1	0	0	0	0	0	0	1	1	0	0	0
chr10:74100546-74100928	74100546	74100928	0	0	0	1	0	0	1	1	0	1	1	0	0	2	1	2	1	2	2	0	3	1	1	0	0	0	0	0	2	0	0	0	0	2	7	1	0	0	0	0
chr10:74103123-74104885	74103123	74104885	0	0	0	0	0	0	0	0	0	0	0	0	0	0	0	0	0	0	1	0	0	0	0	0	0	1	1	0	0	0	0	0	0	0	3	1	0	0	0	0
chr10:74167686-74268027	74167686	74268027	0	0	0	0	0	0	0	0	0	0	0	0	0	0	0	0	0	0	0	0	0	0	0	0	0	0	0	0	0	3	0	0	0	0	0	0	0	0	0	0
chr10:74310936-74326552	74310936	74326552	0	0	0	0	0	0	0	0	0	0	0	0	0	0	0	0	0	0	0	0	0	0	0	0	0	0	0	1	0	0	0	0	1	3	2	0	0	0	0	0
chr10:74322652-74326552	74322652	74326552	0	0	0	0	0	0	0	0	0	0	0	0	0	0	0	0	1	0	0	0	0	0	0	0	0	0	1	0	0	1	0	0	5	4	2	5	0	0	0	0
chr10:74468040-74475660	74468040	74475660	0	0	0	0	0	0	0	0	0	0	0	0	0	3	0	0	0	0	1	0	0	0	0	0	0	0	1	0	0	0	0	0	0	0	0	0	0	0	0	0
chr10:74804738-74834673	74804738	74834673	0	0	0	0	0	0	0	0	0	0	0	0	0	0	0	0	0	0	0	0	0	0	0	0	0	0	0	0	0	2	0	0	0	0	0	0	0	0	0	0
chr10:74806682-74813348	74806682	74813348	0	0	0	0	0	0	0	0	0	0	0	0	0	0	0	0	0	0	0	0	0	0	0	0	0	1	0	0	0	0	0	0	3	0	0	1	6	0	0	0
chr10:74813108-74834673	74813108	74834673	0	0	0	0	0	0	0	0	0	0	0	0	0	0	0	0	0	0	0	0	0	0	0	0	0	0	0	0	0	0	0	0	0	0	0	0	0	0	3	0
chr10:74906033-74923708	74906033	74923708	0	0	0	0	0	0	0	0	0	0	0	0	0	1	1	0	0	0	0	0	0	0	0	0	2	0	0	1	0	0	0	0	0	0	5	1	0	0	0	0
chr10:74912050-74920309	74912050	74920309	0	0	0	0	0	0	0	0	0	0	0	0	0	0	0	0	0	0	0	0	0	0	0	0	0	0	0	0	0	0	0	0	0	0	0	0	0	8	0	0
chr10:74914013-74916413	74914013	74916413	0	0	0	0	0	0	0	0	0	0	0	0	0	0	0	0	0	0	0	0	0	0	0	0	0	1	0	0	0	0	0	0	0	2	0	0	0	0	0	0
chr10:74920191-74923708	74920191	74923708	0	0	0	0	0	0	0	0	0	0	0	0	0	0	0	0	0	0	0	0	0	0	0	0	0	0	0	0	0	0	11	0	0	0	0	0	0	0	0	0
chr10:75069915-75072401	75069915	75072401	0	0	0	0	0	0	0	0	0	0	0	0	0	0	0	0	0	0	0	0	0	0	0	0	0	0	0	0	0	0	0	0	0	0	0	0	0	0	5	0
chr10:75147446-75160615	75147446	75160615	0	0	0	0	0	0	0	0	0	0	0	0	0	0	0	0	0	1	0	0	0	0	0	2	0	0	0	0	0	0	0	0	0	0	1	0	0	0	0	0
chr10:75156276-75160615	75156276	75160615	0	0	0	1	0	0	0	0	0	0	0	0	0	0	0	0	0	0	0	0	1	0	0	2	0	0	1	0	0	0	0	0	0	2	0	2	0	0	0	0
chr10:75214169-75234788	75214169	75234788	0	0	0	0	0	0	0	0	0	0	0	0	0	0	0	0	0	0	0	1	0	0	0	0	0	0	0	0	0	0	0	0	0	3	0	0	0	0	0	0
chr10:75214169-75239275	75214169	75239275	0	0	0	0	0	0	0	0	0	0	1	0	0	0	0	0	0	0	0	0	1	1	1	0	0	0	0	0	0	0	0	0	3	0	3	0	0	0	0	0
chr10:75227310-75239275	75227310	75239275	0	0	0	0	0	0	0	1	0	0	0	0	0	0	0	0	0	0	0	0	0	0	0	0	0	0	2	0	0	0	0	0	0	0	0	1	0	3	0	0
chr10:75234676-75239275	75234676	75239275	0	0	0	0	0	0	0	0	1	0	0	0	0	0	0	0	0	1	0	1	1	1	0	0	0	1	0	0	0	3	0	0	5	8	0	3	4	2	0	0
chr10:75279554-75299351	75279554	75299351	0	0	0	0	0	0	0	0	0	0	0	0	0	0	0	2	0	0	0	0	0	0	0	0	0	0	0	0	0	0	0	0	0	0	0	0	0	0	0	0
chr10:75302560-75302889	75302560	75302889	0	0	0	0	0	0	0	0	0	0	0	0	0	0	0	0	0	0	0	0	0	0	0	0	0	0	0	0	0	0	0	0	0	3	0	0	0	0	0	0
chr10:75478917-75481262	75478917	75481262	0	1	0	0	0	0	0	0	0	0	0	0	0	0	0	0	0	0	0	0	1	2	0	0	0	0	0	0	0	0	0	0	0	0	0	0	0	0	0	0
chr10:75506387-75506762	75506387	75506762	0	1	0	0	0	0	0	0	0	0	0	0	0	0	0	0	0	0	0	0	0	0	0	0	3	0	0	0	1	0	0	0	0	0	0	0	0	0	0	0
chr10:75519379-75527765	75519379	75527765	0	0	0	0	0	0	0	0	0	0	0	0	0	0	0	0	2	0	0	0	0	0	0	0	0	0	0	0	0	0	0	0	0	0	0	0	0	0	0	0
chr10:75562431-75570661	75562431	75570661	0	0	0	2	0	0	0	0	0	0	0	0	0	0	0	0	0	0	0	0	0	0	0	0	0	0	0	0	0	0	0	0	0	0	0	0	0	0	0	0
chr10:75830427-75843271	75830427	75843271	0	0	0	0	0	0	0	0	0	0	0	0	0	0	0	0	0	0	0	0	0	0	0	0	0	0	2	0	0	0	0	0	0	0	0	0	0	0	0	0
chr10:75834500-75849956	75834500	75849956	0	0	0	0	0	0	0	0	0	0	0	0	0	0	0	0	0	0	0	0	0	0	0	0	0	0	0	0	2	0	0	0	0	0	0	0	0	0	0	0
chr10:75848953-75854219	75848953	75854219	0	0	0	0	0	0	0	0	0	0	0	0	0	0	0	0	0	0	0	0	0	0	0	2	0	0	0	0	0	0	0	0	0	0	0	0	0	0	0	0
chr10:75856961-75860855	75856961	75860855	0	0	0	0	0	0	0	0	0	0	0	0	0	0	0	0	0	0	0	0	0	0	0	0	0	0	0	0	0	0	0	0	0	2	0	3	0	0	0	0
chr10:76074424-76158337	76074424	76158337	0	0	1	0	0	0	0	0	0	0	1	0	1	0	0	0	0	0	0	0	0	0	0	0	0	0	0	0	0	0	0	0	0	0	2	0	0	0	8	0
chr10:76153898-76158337	76153898	76158337	0	1	0	0	0	0	0	0	0	0	2	0	0	0	0	0	0	0	0	0	0	0	1	0	0	0	0	0	0	0	0	0	0	0	0	3	0	0	0	0
chr10:76602357-76603236	76602357	76603236	0	0	0	0	1	0	0	0	0	0	0	0	0	0	0	0	0	1	0	0	0	0	0	0	1	3	0	0	0	0	0	0	0	0	0	2	9	0	0	0
chr10:76719727-76739097	76719727	76739097	0	0	0	0	0	0	0	0	0	0	0	0	0	0	0	0	0	0	0	0	0	0	0	0	0	0	0	0	0	0	0	0	0	0	5	0	0	0	0	0
chr10:76719727-76748870	76719727	76748870	0	0	0	0	0	0	0	0	0	0	0	0	0	0	0	0	0	0	0	0	0	0	0	0	0	0	0	0	0	0	0	0	0	6	0	0	0	0	0	0
chr10:76737073-76748870	76737073	76748870	0	0	0	0	0	0	0	0	0	0	0	0	0	0	0	0	1	0	0	0	0	0	0	0	0	0	0	0	0	0	0	0	0	0	0	0	9	0	0	0
chr10:76738981-76748870	76738981	76748870	0	0	0	0	0	0	0	0	0	0	0	0	0	0	0	0	0	0	0	0	0	0	0	0	0	0	0	0	0	0	0	0	0	0	7	0	0	0	0	0
chr10:76910271-76910864	76910271	76910864	1	0	0	0	0	0	0	0	0	0	0	0	0	0	0	0	0	0	0	0	0	0	0	0	0	0	0	0	0	0	0	0	0	0	3	0	0	0	0	0
chr10:76978820-76979114	76978820	76979114	0	0	0	0	0	0	0	0	0	0	0	0	0	0	0	0	0	0	0	0	0	0	0	0	0	0	0	0	0	0	0	0	6	0	0	0	0	0	0	0
chr10:7801852-7808066	7801852	7808066	0	0	0	0	0	0	0	0	0	0	0	0	0	0	0	0	0	0	0	0	0	0	0	0	0	0	0	0	0	2	0	0	0	2	0	0	3	0	0	0
chr10:7817713-7822270	7817713	7822270	0	0	0	0	0	0	0	0	0	0	0	0	0	0	0	0	0	0	0	0	0	0	0	0	0	0	0	0	0	0	0	0	0	0	0	2	0	0	0	0
chr10:7820800-7822270	7820800	7822270	0	0	0	0	0	0	0	0	0	0	0	0	0	0	0	0	0	0	0	0	0	0	0	0	0	1	0	0	2	0	0	1	0	0	0	0	0	0	0	0
chr10:7838083-7844817	7838083	7844817	0	0	0	0	0	0	0	0	0	0	0	0	0	0	2	0	0	0	0	0	0	0	0	0	0	0	0	0	0	0	0	0	0	0	0	0	0	0	0	0
chr10:7839009-7844817	15678018	15689634	7	8	4	5	2	3	2	4	2	6	3	1	4	3	6	3	0	8	3	1	2	9	5	2	2	18	1	6	0	27	0	8	4	28	34	7	0	1	1	0
chr10:79579265-79579652	79579265	79579652	0	0	0	0	0	0	0	0	0	0	0	0	0	0	0	0	0	0	0	0	0	0	0	0	2	0	0	0	0	0	0	0	0	0	0	0	0	0	0	0
chr10:79613111-79614128	79613111	79614128	1	0	0	0	0	0	0	0	0	0	0	0	0	0	0	0	0	0	0	0	0	0	0	0	0	0	0	0	0	0	0	0	0	0	0	0	2	0	0	0
chr10:79741911-79744056	79741911	79744056	0	0	0	0	0	0	0	0	0	0	0	0	0	0	0	0	0	0	0	0	0	0	0	0	0	0	0	0	0	0	0	0	0	0	3	0	0	0	0	0
chr10:79761954-79767624	79761954	79767624	0	0	0	0	0	0	1	0	0	0	0	0	0	0	0	0	0	0	0	0	0	0	0	0	0	0	0	0	0	0	0	0	3	1	0	0	0	0	0	0
chr10:8005882-8019286	8005882	8019286	0	0	0	0	0	0	0	0	0	0	0	0	1	0	1	0	0	0	0	0	0	0	0	0	0	0	1	0	0	3	0	0	0	0	1	0	0	0	0	0
chr10:81564240-81574472	81564240	81574472	0	0	0	0	0	0	0	0	0	0	0	0	0	0	0	0	0	0	0	0	0	0	0	0	0	0	0	0	2	0	0	0	0	0	0	0	0	0	3	0
chr10:82222843-82228443	82222843	82228443	0	0	0	0	0	0	0	0	0	0	0	0	0	0	1	0	0	0	0	0	0	0	0	0	0	0	0	0	0	0	0	0	0	2	0	0	0	0	0	0
chr10:82228302-82249070	82228302	82249070	0	0	1	0	0	0	0	0	0	0	0	0	0	0	0	0	0	0	0	0	0	0	0	0	0	0	0	0	0	0	0	0	5	0	0	2	0	0	6	0
chr10:85903750-85908594	85903750	85908594	0	0	0	0	0	0	0	0	0	0	0	0	0	0	0	0	0	0	0	0	0	0	0	0	0	0	0	0	0	0	0	0	0	4	0	0	0	0	0	0
chr10:86130769-86133571	86130769	86133571	0	0	0	0	0	1	0	0	0	0	0	0	0	0	0	0	0	0	0	0	0	0	0	0	0	0	0	0	0	6	0	0	0	0	0	3	4	0	0	0
chr10:863664-871810	863664	871810	0	0	0	0	0	0	0	0	0	0	0	0	0	0	0	0	0	0	0	0	0	0	0	0	0	0	0	0	0	0	0	0	0	4	0	0	0	0	0	0
chr10:866739-931700	866739	931700	0	0	0	0	0	0	0	0	0	0	0	0	0	0	0	0	0	0	0	0	0	0	0	0	0	0	0	0	3	0	0	0	0	0	0	0	0	0	0	0
chr10:875324-890995	875324	890995	0	0	0	0	0	0	0	0	0	0	0	0	0	1	0	0	0	0	0	1	0	0	0	0	0	0	0	0	0	0	0	0	1	0	3	0	0	0	0	0
chr10:88203031-88220253	88203031	88220253	1	0	0	0	0	0	0	0	0	0	0	0	0	0	0	0	0	0	0	0	0	0	0	0	0	1	0	0	0	0	0	0	0	0	2	0	0	0	0	0
chr10:88203031-88221044	88203031	88221044	0	0	0	0	0	0	0	0	0	0	0	0	0	0	0	0	0	0	0	0	0	0	0	0	0	0	0	0	0	0	0	0	0	2	0	1	0	0	0	0
chr10:88203031-88233730	88203031	88233730	0	0	0	0	0	0	0	0	0	0	0	1	0	0	0	1	1	0	0	0	0	0	0	0	0	0	0	0	0	0	7	0	0	0	0	0	0	0	0	0
chr10:88205998-88221044	88205998	88221044	0	0	0	0	0	0	0	0	0	0	0	0	0	0	0	0	0	0	0	0	0	0	0	0	0	0	1	1	0	0	10	0	0	0	0	3	0	0	0	0
chr10:88205998-88233730	88205998	88233730	0	0	0	0	0	0	0	0	0	0	0	0	0	1	1	0	1	0	0	0	0	0	0	0	0	2	0	0	4	0	0	0	0	4	0	0	0	0	0	0
chr10:88211723-88213588	88211723	88213588	0	0	0	0	0	0	0	0	0	0	0	0	0	0	0	0	0	0	0	0	0	0	0	0	0	0	0	0	0	0	0	0	0	0	2	0	0	0	0	0
chr10:88211723-88220253	88211723	88220253	0	0	0	0	0	0	0	0	0	0	0	0	0	0	0	0	0	0	0	0	0	0	0	0	0	0	0	0	0	0	0	0	2	0	0	0	0	0	0	0
chr10:88211723-88221044	88211723	88221044	0	2	1	0	0	0	0	0	0	0	1	0	2	0	0	0	0	0	0	1	0	1	0	0	0	0	0	1	0	0	0	5	0	0	0	2	0	0	0	0
chr10:88211723-88233730	88211723	88233730	1	0	0	0	0	0	0	0	0	0	0	0	0	1	0	0	1	1	0	0	0	0	1	1	0	2	0	0	0	0	0	0	0	7	5	1	0	0	0	10
chr10:88212976-88220253	88212976	88220253	0	0	0	0	0	0	0	0	0	0	0	1	0	0	0	0	1	0	0	0	0	0	0	0	0	0	0	0	0	0	0	0	0	3	0	1	4	0	0	0
chr10:88212976-88227263	88212976	88227263	0	0	0	0	0	0	0	0	0	0	0	0	0	0	0	0	0	0	0	0	0	0	0	0	0	0	0	0	0	0	0	0	1	0	4	2	0	0	0	0
chr10:88212976-88260500	88212976	88260500	0	0	0	0	0	0	0	0	0	0	0	0	0	0	0	0	0	0	0	0	0	0	0	0	0	0	0	0	0	0	2	0	0	0	0	0	0	0	0	0
chr10:88218745-88233730	88218745	88233730	0	0	0	0	0	0	0	0	0	0	0	0	0	1	0	0	0	0	0	0	0	0	0	0	0	0	0	0	0	3	0	0	0	0	6	0	0	0	0	0
chr10:88220155-88233730	88220155	88233730	0	0	0	0	0	0	0	0	0	0	0	0	0	0	0	0	0	0	0	0	0	0	0	0	0	0	0	0	0	0	0	0	3	0	0	2	0	0	0	0
chr10:88220932-88227263	88220932	88227263	0	0	0	0	0	0	0	0	0	0	0	0	0	0	0	0	0	0	0	0	0	0	0	0	0	0	0	0	0	0	0	0	0	0	0	0	0	0	9	0
chr10:88220932-88233730	88220932	88233730	0	0	0	0	0	0	0	0	0	0	0	0	0	0	0	0	0	0	0	0	0	0	0	0	0	0	0	0	0	0	0	0	0	0	2	0	0	0	0	0
chr10:88227035-88233730	88227035	88233730	0	0	0	0	0	0	0	0	0	0	0	1	0	0	1	0	0	0	0	0	0	0	0	0	0	0	1	1	0	0	0	0	5	12	10	1	2	0	0	0
chr10:88227035-88260500	88227035	88260500	0	0	0	0	0	0	0	0	0	0	0	0	0	0	0	0	0	0	0	0	0	0	0	0	0	0	0	0	0	0	0	0	0	7	0	0	0	0	0	0
chr10:88230748-88233730	88230748	88233730	0	0	0	0	0	0	0	0	0	0	0	0	0	0	0	0	0	0	1	0	1	0	0	1	3	0	0	0	3	0	0	3	2	3	11	13	1	4	0	0
chr10:88231964-88233730	88231964	88233730	0	0	0	0	0	0	0	0	0	0	0	0	0	0	0	0	0	0	0	0	0	0	2	0	1	0	0	0	0	0	0	0	13	7	2	3	2	0	0	0
chr10:882342-890995	882342	890995	1	0	0	3	0	0	0	0	0	0	1	0	0	0	1	0	0	0	0	0	0	0	0	0	0	0	0	0	1	0	0	0	0	0	0	1	0	0	0	0
chr10:882342-931700	882342	931700	0	0	0	0	0	0	1	0	0	0	1	0	0	0	0	0	0	1	0	0	0	0	0	0	0	0	0	1	0	6	0	0	5	0	0	0	0	0	0	0
chr10:88256957-88260500	88256957	88260500	0	0	0	1	0	0	0	0	0	0	0	0	0	0	0	0	0	1	1	0	0	0	0	0	0	0	0	0	0	0	0	0	3	6	0	0	10	0	0	0
chr10:88277327-88277848	88277327	88277848	0	0	0	0	0	0	0	0	0	0	0	0	0	0	0	0	0	0	0	0	0	0	1	0	0	0	0	0	2	0	0	0	2	5	4	0	0	0	0	0
chr10:888871-890995	888871	890995	0	0	0	0	0	0	0	0	0	0	0	0	0	0	0	0	0	0	0	0	0	0	0	0	2	0	0	0	0	0	0	0	0	0	1	3	0	0	0	0
chr10:89268092-89280926	89268092	89280926	1	0	0	0	0	2	2	1	1	2	1	3	2	0	0	3	2	3	1	0	0	2	1	3	1	7	0	4	7	8	0	12	15	29	24	10	15	0	0	13
chr10:89527429-89536184	89527429	89536184	1	2	0	1	0	1	0	1	0	0	0	0	1	2	0	0	1	1	0	1	1	1	0	0	0	0	0	0	0	0	0	0	0	0	0	0	0	0	0	0
chr10:89653781-89693008	89653781	89693008	0	0	0	0	0	0	0	0	0	0	0	0	0	0	0	0	0	0	0	0	0	0	0	0	0	0	0	0	0	0	0	0	0	0	6	0	0	0	0	0
chr10:89685269-89693008	89685269	89693008	0	0	0	0	0	0	0	0	0	0	0	0	0	0	0	0	0	0	0	0	0	0	0	0	0	2	0	0	1	0	11	0	1	0	5	2	0	0	0	0
chr10:89685269-89720875	89685269	89720875	0	0	0	0	0	0	0	0	0	0	0	0	0	0	0	0	0	0	0	0	0	0	0	0	0	0	0	0	0	0	0	0	0	3	0	0	0	0	0	0
chr10:89690802-89720875	89690802	89720875	0	0	0	0	0	0	0	0	0	0	0	0	0	0	0	0	0	0	0	0	0	0	0	0	0	0	0	0	0	0	0	0	0	0	4	0	0	0	0	0
chr10:89711874-89720875	89711874	89720875	0	0	0	0	0	0	0	0	0	0	0	0	0	0	0	0	0	0	0	0	0	0	0	0	0	0	0	0	0	0	0	0	0	0	6	0	0	0	0	0
chr10:909682-910210	909682	910210	0	1	0	0	0	0	1	1	1	0	0	0	0	0	0	0	0	0	0	0	0	0	0	0	0	0	0	1	0	0	0	0	0	0	0	2	0	0	0	0
chr10:909682-931700	909682	931700	0	2	1	0	0	0	0	1	0	0	0	0	0	0	0	0	0	0	0	0	1	0	0	0	1	1	0	0	0	0	0	5	0	0	0	0	1	0	3	0
chr10:91474711-91483860	91474711	91483860	0	0	0	0	0	0	0	0	0	0	0	0	0	0	0	0	0	0	0	0	0	0	0	0	0	0	0	0	0	3	0	0	0	0	0	0	0	0	0	0
chr10:91476192-91484915	91476192	91484915	0	0	0	0	0	1	0	0	0	1	0	0	0	0	0	0	0	0	0	0	0	0	0	0	0	0	0	0	0	0	7	0	0	0	0	0	0	0	0	0
chr10:91478466-91486278	91478466	91486278	0	1	0	0	0	0	0	0	0	0	0	0	0	0	0	0	0	0	0	0	0	0	0	0	0	0	0	0	0	4	5	0	7	0	0	2	0	0	0	0
chr10:91479175-91487653	91479175	91487653	0	0	0	0	0	0	0	0	0	0	0	0	0	0	0	0	0	0	0	0	0	0	0	0	0	0	0	0	0	0	0	0	3	0	0	0	0	0	0	0
chr10:91479175-91498853	91479175	91498853	0	0	0	0	0	2	0	0	0	0	0	0	0	0	0	0	0	0	0	0	0	0	0	0	0	0	0	0	0	0	0	0	0	0	0	0	0	0	0	0
chr10:91483720-91503684	91483720	91503684	0	0	0	0	0	0	0	0	0	0	0	0	0	0	0	0	0	0	0	0	0	0	0	0	0	0	0	0	0	0	0	0	0	8	0	0	0	0	0	0
chr10:91497143-91498853	91497143	91498853	0	0	0	0	0	0	0	0	0	0	0	0	0	0	0	0	0	0	0	0	0	0	0	0	0	0	0	0	0	0	0	0	0	0	5	0	0	0	0	0
chr10:91497143-91518639	91497143	91518639	0	0	0	0	0	0	0	0	0	0	0	0	0	0	0	0	0	0	0	0	0	0	0	0	0	0	0	0	0	6	0	0	0	0	0	0	0	0	0	0
chr10:91498714-91522592	91498714	91522592	0	0	0	0	0	1	0	0	1	0	0	0	0	0	0	0	0	1	2	0	1	2	1	1	3	0	0	0	3	0	0	0	2	1	6	1	0	0	0	0
chr10:91503564-91514430	91503564	91514430	0	0	0	0	0	0	0	1	0	0	0	0	0	0	0	0	0	0	0	0	0	0	0	0	0	0	0	0	0	0	0	4	0	0	4	0	0	0	0	0
chr10:91503564-91522592	91503564	91522592	0	0	0	0	0	0	0	0	0	0	0	0	0	0	1	0	0	0	0	0	0	0	0	0	0	0	0	0	0	0	0	0	0	5	0	0	0	0	0	0
chr10:91505655-91514430	91505655	91514430	0	0	0	0	0	0	0	0	0	0	0	0	0	0	0	0	0	0	0	0	0	0	0	0	0	0	0	0	0	0	0	0	1	0	0	0	0	0	3	0
chr10:91511102-91522592	183022204	183045184	5	2	2	6	3	2	7	6	4	3	2	5	3	7	2	3	6	4	10	3	4	7	5	11	4	10	7	12	13	29	12	23	60	107	78	70	39	7	52	35
chr10:91512323-91522592	183024646	183045184	0	0	0	0	0	0	0	0	0	0	0	0	0	0	0	0	0	0	0	0	0	0	0	0	0	0	0	0	0	0	0	0	0	0	6	0	0	0	0	0
chr10:91520282-91532588	91520282	91532588	0	0	0	0	0	0	0	0	0	0	0	0	0	0	0	0	0	0	0	0	0	0	0	0	0	0	0	0	0	0	0	0	0	0	0	2	0	0	0	0
chr10:92982445-93024277	92982445	93024277	0	0	0	0	0	0	0	0	0	0	0	0	0	0	0	0	0	0	0	0	0	0	0	0	0	0	0	0	0	0	0	0	0	3	0	0	0	0	0	0
chr10:93185037-93221941	93185037	93221941	0	0	1	0	0	0	0	0	0	2	1	0	0	0	0	1	1	0	0	0	0	0	0	0	0	0	0	1	0	0	0	0	3	5	0	0	0	0	0	0
chr10:93579026-93582119	93579026	93582119	0	0	0	0	0	0	0	0	0	0	0	0	0	0	0	0	0	0	0	0	0	0	0	0	0	0	0	0	0	0	0	0	0	2	0	0	0	0	0	0
chr10:93579026-93602148	93579026	93602148	0	0	0	0	0	0	0	0	0	0	0	0	1	0	0	0	0	0	0	0	0	0	0	1	0	0	0	0	2	0	8	0	0	0	0	4	0	0	0	0
chr10:93586773-93602148	93586773	93602148	0	0	1	0	1	0	0	0	0	0	0	0	0	0	0	0	0	0	0	0	0	0	0	0	2	0	0	0	0	0	0	0	0	0	0	0	0	0	0	0
chr10:93600317-93602148	93600317	93602148	0	0	0	0	0	0	0	0	0	0	0	0	0	0	0	0	0	0	0	0	0	0	0	0	0	0	0	0	0	4	0	0	0	0	0	0	0	0	0	0
chr10:93608139-93611093	93608139	93611093	0	0	0	0	0	0	0	0	0	0	0	0	0	0	0	0	0	0	0	0	0	0	0	0	0	0	0	0	0	0	1	0	0	2	0	3	0	0	0	0
chr10:93699708-93713630	93699708	93713630	0	0	0	1	0	0	0	0	0	0	0	0	0	0	0	1	0	0	0	0	0	0	0	0	0	0	0	0	0	4	0	0	0	0	0	0	0	0	0	0
chr10:93702178-93716414	93702178	93716414	0	0	0	0	0	0	0	0	0	0	0	1	0	0	0	0	0	0	0	0	0	0	0	0	0	0	0	0	0	0	0	0	0	7	0	0	0	0	0	0
chr10:93711159-93716414	93711159	93716414	0	0	0	0	0	0	0	0	0	0	0	0	0	0	0	0	0	0	0	0	0	0	0	0	0	0	0	0	0	0	0	0	0	0	2	0	0	0	0	0
chr10:93711159-93726514	93711159	93726514	0	0	0	0	0	0	0	1	0	0	0	0	0	1	1	0	0	1	0	0	0	0	0	0	0	0	0	0	0	0	0	0	0	2	0	0	0	0	4	0
chr10:93713493-93741549	93713493	93741549	0	0	0	0	0	0	0	0	0	0	0	0	0	0	0	0	0	0	0	0	0	0	0	0	2	0	0	0	0	0	0	0	0	0	0	0	0	0	0	0
chr10:93751875-93753604	93751875	93753604	0	0	0	0	0	0	0	0	0	0	0	0	0	0	0	0	0	0	0	0	0	0	0	0	0	0	0	0	0	0	0	0	0	0	0	4	0	0	0	0
chr10:93751875-93768032	93751875	93768032	1	0	0	2	0	0	0	0	1	0	0	0	0	0	0	0	0	0	0	0	0	0	0	0	0	0	0	2	0	0	0	0	0	0	0	0	0	0	0	0
chr10:93754291-93757508	93754291	93757508	0	0	0	0	0	0	0	0	0	0	0	0	1	0	0	0	0	0	0	0	0	0	0	0	0	0	0	0	0	0	0	0	0	0	0	0	8	0	0	0
chr10:93754291-93768032	93754291	93768032	1	0	1	1	0	0	0	0	0	1	0	1	0	1	1	1	0	2	0	1	1	0	0	0	4	2	0	0	0	0	0	0	4	8	3	1	0	0	0	0
chr10:93754291-93776222	93754291	93776222	0	0	0	0	0	0	0	0	0	0	0	0	0	0	0	0	0	0	0	0	0	0	0	0	0	0	0	0	2	0	0	0	0	0	0	0	0	0	0	0
chr10:93756125-93768032	93756125	93768032	0	0	0	0	1	1	1	0	0	0	0	1	0	0	0	0	0	1	0	0	0	0	0	1	0	0	0	0	2	0	3	9	0	0	3	1	0	0	0	0
chr10:93767879-93768965	93767879	93768965	0	0	0	0	0	0	0	0	0	0	0	0	0	0	0	0	0	0	0	0	0	0	0	0	0	0	0	0	2	0	0	0	0	0	0	0	0	0	0	0
chr10:93940719-94000118	93940719	94000118	0	0	0	0	0	0	0	0	0	0	0	0	0	0	0	0	0	0	0	0	0	0	0	0	2	0	0	0	0	0	0	0	0	0	2	0	0	0	0	0
chr10:94215332-94235751	94215332	94235751	0	0	0	0	0	0	0	0	0	0	0	0	0	0	0	0	0	0	0	0	0	0	0	0	0	2	0	0	0	0	0	0	0	0	0	0	0	0	0	0
chr10:94243011-94268647	94243011	94268647	1	0	0	0	0	0	0	0	0	0	0	0	0	0	0	0	0	0	0	0	0	0	0	0	0	2	0	0	0	0	0	0	0	0	0	0	0	0	0	0
chr10:94264550-94274799	94264550	94274799	0	0	0	0	0	0	0	0	0	0	0	0	0	0	0	0	0	0	0	0	0	0	0	0	0	0	0	0	0	4	0	0	0	0	2	0	0	0	0	0
chr10:94291504-94297307	94291504	94297307	0	0	0	0	0	0	1	0	3	0	0	1	0	2	2	1	0	0	0	2	0	0	0	0	0	0	0	0	1	9	0	1	0	5	2	4	3	0	0	0
chr10:94291504-94318972	94291504	94318972	0	1	0	1	0	0	0	0	0	0	0	0	0	0	0	0	0	0	0	0	0	0	0	0	0	0	0	0	0	4	0	0	0	0	0	0	0	0	0	0
chr10:94314637-94318972	94314637	94318972	0	0	0	0	0	0	0	0	0	0	0	0	0	0	0	0	0	0	0	0	0	0	0	0	2	0	0	0	0	0	0	0	0	0	0	0	0	0	0	0
chr10:94366021-94373376	94366021	94373376	0	0	0	0	0	0	0	0	0	0	0	0	0	0	0	0	0	0	0	0	0	0	0	0	0	0	0	0	0	0	0	0	10	0	0	0	0	0	0	0
chr10:94366021-94376589	94366021	94376589	0	0	0	0	0	0	0	0	0	0	0	0	1	0	0	0	0	0	0	0	0	0	0	0	0	0	0	0	1	0	0	0	4	1	0	0	1	0	0	0
chr10:94366021-94381230	94366021	94381230	0	0	0	0	0	0	0	0	0	0	0	0	0	1	0	0	0	2	0	1	0	0	0	1	0	0	1	0	1	0	0	0	0	4	1	1	0	5	0	0
chr10:94366021-94399657	94366021	94399657	0	0	0	0	0	0	0	0	0	0	0	0	0	0	0	0	0	0	0	0	0	0	0	0	0	0	0	0	0	0	0	0	4	0	0	0	0	0	0	0
chr10:94368776-94373376	94368776	94373376	0	0	0	0	0	0	0	0	0	0	0	0	0	0	0	0	0	0	0	0	0	0	0	0	0	0	0	0	0	3	0	0	0	0	0	0	5	0	0	0
chr10:94368776-94381230	94368776	94381230	0	0	0	0	0	0	0	0	1	0	0	0	0	0	0	0	0	0	0	0	0	0	3	0	0	0	0	0	0	0	0	0	7	0	0	0	0	0	0	0
chr10:94368776-94390121	94368776	94390121	0	0	0	0	0	0	0	0	0	0	0	1	0	0	0	0	0	0	0	0	0	0	0	0	0	0	0	0	0	0	0	0	0	0	6	0	0	0	0	0
chr10:94372796-94381230	94372796	94381230	0	0	0	0	0	0	0	0	0	0	0	0	0	0	0	0	0	0	0	0	0	0	0	0	0	0	0	0	0	7	0	0	0	0	2	0	0	0	0	0
chr10:94381141-94390121	188762282	188780242	0	0	0	0	0	0	0	0	0	0	0	0	0	0	0	0	0	0	0	0	0	1	0	1	0	1	0	0	0	0	0	0	5	2	1	1	0	0	0	0
chr10:94381141-94393552	94381141	94393552	0	0	0	0	0	0	0	0	0	0	0	0	0	0	0	0	0	0	0	0	1	0	0	0	0	0	0	0	0	0	0	1	3	0	0	0	0	0	0	0
chr10:94381141-94397302	94381141	94397302	0	0	0	0	0	0	0	0	0	0	0	0	0	0	0	0	0	0	0	0	0	0	1	0	0	0	0	2	0	0	0	0	1	0	0	0	0	0	0	0
chr10:94381141-94399657	94381141	94399657	0	0	0	0	0	0	0	0	0	0	0	0	0	0	0	0	0	0	0	0	0	0	0	0	0	0	0	0	0	0	0	0	0	0	3	0	0	0	0	0
chr10:94381141-94405399	94381141	94405399	0	0	0	0	0	0	0	0	0	0	0	0	0	0	0	0	0	0	0	0	0	0	0	0	0	0	0	0	0	0	0	0	0	0	0	0	5	0	0	0
chr10:94388564-94392450	94388564	94392450	0	0	0	0	0	0	0	0	0	0	0	0	0	0	0	0	0	0	0	0	0	0	0	0	0	0	0	0	0	0	0	0	0	0	7	0	0	0	0	0
chr10:94388564-94393552	94388564	94393552	0	0	0	0	0	0	0	0	0	0	0	0	0	0	0	0	0	0	1	0	0	0	1	0	0	0	0	0	0	2	0	0	0	5	0	0	0	0	0	0
chr10:94392242-94397302	94392242	94397302	0	0	0	0	0	0	0	0	0	0	0	0	1	0	0	0	1	0	0	0	0	0	0	0	0	0	0	0	0	0	0	0	0	10	0	0	0	0	0	0
chr10:94396940-94397302	94396940	94397302	0	0	0	0	0	0	0	0	0	0	0	0	0	0	0	0	0	0	0	0	0	0	0	0	0	0	0	0	0	0	0	0	4	2	0	0	0	0	0	0
chr10:94396940-94399657	94396940	94399657	0	0	1	0	0	0	0	1	0	0	0	0	0	0	0	0	1	0	0	1	0	1	0	0	0	0	0	0	0	0	0	8	1	0	0	0	0	0	0	0
chr10:94396940-94405399	94396940	94405399	0	0	0	0	0	0	0	0	0	0	0	0	2	0	0	0	0	1	0	0	0	0	0	0	0	0	0	0	0	0	0	0	3	4	0	0	0	0	0	0
chr10:94397143-94410274	94397143	94410274	0	0	0	0	0	0	0	0	0	0	0	0	0	0	0	0	0	0	0	0	0	0	0	0	0	0	0	0	2	0	0	0	0	0	0	0	0	0	0	0
chr10:94399550-94405399	94399550	94405399	0	0	0	0	0	0	0	0	0	0	0	0	0	0	0	0	0	0	0	0	0	0	0	0	0	0	0	0	0	0	0	0	4	2	0	0	0	0	0	0
chr10:94407968-94410274	94407968	94410274	0	0	0	0	0	0	0	0	0	0	0	0	0	0	0	0	1	0	0	1	0	0	0	0	0	0	0	0	1	0	0	0	0	2	0	1	0	0	0	0
chr10:94409591-94410274	94409591	94410274	0	0	0	0	0	0	0	0	0	0	0	0	0	0	0	0	0	0	0	0	1	0	0	0	0	0	0	0	0	3	0	0	0	0	0	0	0	0	0	0
chr10:94653105-94679807	94653105	94679807	0	2	0	1	0	0	0	0	0	3	0	0	0	0	0	0	0	0	0	0	0	0	0	0	0	1	0	0	0	0	0	0	0	0	0	0	0	0	0	0
chr10:94659355-94675670	94659355	94675670	0	0	0	0	0	0	0	0	0	0	0	0	0	0	0	0	0	0	0	0	0	0	0	0	0	0	0	0	0	0	0	0	0	0	0	2	0	0	0	0
chr10:94659355-94679807	94659355	94679807	0	0	0	0	0	0	0	0	0	0	0	0	0	0	0	0	0	0	0	0	0	0	0	0	0	0	0	0	0	0	0	0	0	0	2	0	0	0	0	0
chr10:94669183-94675670	94669183	94675670	0	0	0	0	0	0	0	0	0	0	0	0	0	0	0	0	0	0	0	0	0	0	0	0	0	0	0	0	0	3	0	0	0	0	0	0	0	0	0	0
chr10:94669183-94733989	94669183	94733989	0	0	0	0	0	0	0	0	0	0	0	0	0	0	0	0	0	0	0	0	0	0	0	0	0	0	0	0	0	0	0	0	0	0	4	0	0	0	0	0
chr10:94688095-94715471	94688095	94715471	0	0	0	0	0	0	0	0	0	0	0	0	0	0	0	0	0	0	0	0	0	0	0	0	0	0	0	0	0	0	0	0	0	4	0	0	0	0	0	0
chr10:94693900-94733989	94693900	94733989	0	0	0	0	0	0	0	0	0	1	0	0	0	0	0	0	1	0	0	0	0	2	0	0	0	0	0	0	0	0	0	5	0	5	0	1	0	0	0	0
chr10:94715336-94774024	94715336	94774024	0	0	0	0	0	0	0	0	0	0	0	0	0	0	0	0	0	0	0	0	0	0	0	0	0	2	0	0	0	0	0	0	0	0	0	0	0	0	0	0
chr10:95430526-95447206	95430526	95447206	0	0	0	0	0	0	0	0	0	0	0	0	0	0	0	0	0	0	0	0	0	0	0	0	0	0	0	0	0	0	0	0	0	0	10	0	0	0	0	0
chr10:95436409-95447206	95436409	95447206	0	1	0	0	0	0	1	0	0	0	0	0	0	0	0	0	1	0	0	1	0	1	0	2	0	0	0	0	0	3	0	5	0	7	0	0	7	0	0	0
chr10:95443812-95447206	95443812	95447206	0	0	0	0	0	0	0	0	0	0	0	0	0	1	0	0	0	0	0	0	0	0	0	0	0	0	0	0	0	2	0	0	0	0	1	0	0	0	0	0
chr10:96097533-96101502	96097533	96101502	0	0	0	0	0	0	0	0	0	0	0	0	0	0	0	0	0	0	0	0	0	0	0	0	0	0	0	0	0	0	0	0	0	0	2	0	0	0	0	0
chr10:96112066-96117972	96112066	96117972	0	0	0	0	0	0	0	0	0	0	0	0	0	0	0	0	0	0	0	0	0	0	0	0	0	0	0	0	0	0	0	3	0	0	0	0	0	0	0	0
chr10:96201652-96234540	96201652	96234540	0	0	0	0	0	0	0	0	0	0	0	0	0	0	0	1	0	0	0	2	0	0	0	0	0	1	0	0	0	0	0	0	0	6	4	0	0	0	0	0
chr10:96347985-96352069	96347985	96352069	0	0	0	0	0	0	0	0	0	0	0	0	0	0	0	0	0	0	0	0	0	0	0	0	0	0	0	0	0	0	0	3	0	0	0	0	0	0	0	0
chr10:96347985-96354611	96347985	96354611	0	0	0	0	1	0	1	0	0	0	0	0	1	0	0	1	0	1	0	0	0	0	0	0	0	1	0	1	4	0	0	0	0	0	3	1	0	5	1	0
chr10:96351985-96354611	96351985	96354611	0	0	0	0	0	0	0	0	0	0	0	0	0	0	0	0	0	0	0	0	0	0	0	0	0	0	0	0	0	0	0	0	0	3	0	0	0	0	0	0
chr10:97078076-97101435	97078076	97101435	0	0	0	0	0	0	0	0	0	0	0	0	0	0	0	0	0	0	0	0	0	0	0	0	0	0	0	0	0	0	0	0	0	0	0	2	0	0	0	0
chr10:97098889-97106209	97098889	97106209	0	0	0	0	0	0	0	0	0	0	0	0	0	0	0	0	0	0	0	0	0	0	0	0	0	0	0	0	1	0	0	0	0	0	0	2	4	0	0	0
chr10:97170389-97174619	97170389	97174619	0	0	0	0	0	0	0	0	0	0	0	0	0	0	0	0	0	0	0	0	0	0	0	0	0	0	0	0	0	0	0	0	0	0	0	0	0	0	2	0
chr10:97636274-97664695	97636274	97664695	0	0	0	0	0	0	0	0	0	0	1	0	0	0	0	0	0	0	0	0	0	0	0	0	0	0	0	0	0	0	0	0	0	0	3	0	0	0	0	0
chr10:97681772-97687089	97681772	97687089	0	0	0	0	0	0	0	0	0	0	0	0	0	0	0	0	0	0	0	0	0	0	0	0	0	0	0	0	0	0	0	0	0	2	0	0	0	0	0	0
chr10:98286969-98325183	98286969	98325183	0	0	0	0	0	0	0	0	0	0	0	0	0	0	0	0	0	0	0	0	0	0	0	0	2	0	0	0	0	0	0	0	0	0	0	0	0	0	0	0
chr10:98303832-98321895	98303832	98321895	0	0	0	0	0	0	0	0	0	0	0	0	0	0	0	0	0	0	0	0	0	0	0	0	0	0	0	0	0	0	0	0	0	0	0	0	6	0	0	0
chr10:98303832-98325183	98303832	98325183	1	0	2	0	1	0	0	0	0	0	0	0	0	0	0	1	0	0	0	0	2	0	1	1	1	0	0	0	0	0	0	0	8	0	1	0	0	0	8	2
chr10:98303832-98336586	98303832	98336586	0	2	0	1	0	0	0	1	1	0	0	0	1	0	0	1	0	4	1	2	1	4	1	1	5	1	0	3	0	9	9	10	23	6	3	6	6	0	4	9
chr10:98307651-98336586	98307651	98336586	0	0	0	0	0	0	0	0	0	0	0	0	0	0	0	0	0	0	0	0	0	0	1	0	0	0	0	0	0	0	0	7	0	0	0	0	0	0	0	0
chr10:98312684-98325183	98312684	98325183	0	0	0	0	0	0	0	0	0	0	0	0	0	0	0	0	0	0	0	0	0	0	0	0	2	0	0	0	0	0	0	0	0	0	0	0	0	0	0	0
chr10:98319415-98325183	98319415	98325183	0	0	0	0	0	0	0	0	0	0	0	0	0	0	0	0	1	0	0	0	0	0	0	0	0	0	0	0	0	0	0	0	0	0	0	2	0	0	0	0
chr10:98325060-98336586	98325060	98336586	0	0	0	0	0	0	0	0	0	0	0	0	0	0	0	0	0	0	0	0	0	0	0	0	0	0	0	0	0	0	0	0	0	0	0	0	3	0	0	0
chr10:98667021-98709052	98667021	98709052	0	0	0	0	0	0	0	0	0	0	0	0	0	0	0	0	0	0	0	0	0	0	0	0	0	0	0	0	0	0	0	0	0	0	0	0	2	0	0	0
chr10:98667021-98711953	98667021	98711953	0	0	0	0	0	0	0	0	0	0	0	0	0	0	0	0	0	0	0	0	0	0	2	1	0	0	1	3	2	2	0	0	0	10	0	3	0	2	0	0
chr10:98703869-98711953	98703869	98711953	0	0	1	1	0	0	0	0	1	0	0	1	1	0	1	0	0	0	0	0	0	0	1	2	6	0	1	1	1	0	0	0	0	1	11	12	0	9	16	0
chr10:98708764-98711953	98708764	98711953	0	1	0	0	0	0	0	0	0	0	0	0	0	0	0	0	0	0	0	0	0	1	1	0	0	1	0	0	2	0	0	0	0	0	0	0	2	0	0	0
chr10:99003724-99019385	99003724	99019385	0	0	0	0	0	0	0	0	0	0	0	0	0	0	0	0	0	0	0	0	0	0	0	0	0	0	0	0	0	0	0	0	2	0	5	3	0	0	2	0
chr10:99006028-99023386	99006028	99023386	0	0	1	0	0	0	0	0	0	0	0	0	0	0	0	1	0	0	0	0	0	0	0	0	0	0	1	0	0	0	0	0	0	0	0	3	0	0	0	0
chr10:99006028-99024663	99006028	99024663	0	0	0	0	0	0	0	1	0	0	0	0	0	0	0	0	0	1	0	0	0	0	0	0	0	0	0	0	1	0	0	0	0	3	2	0	1	0	0	0
chr10:99196947-99198460	99196947	99198460	0	0	0	0	0	0	0	0	0	0	0	0	0	0	0	0	0	0	0	0	0	0	0	0	0	0	0	0	0	0	0	0	2	0	0	0	0	0	0	0
chr10:99196947-99203068	99196947	99203068	0	0	0	0	0	0	0	0	0	0	0	0	0	0	0	0	0	0	0	0	0	0	0	0	0	0	0	0	0	0	0	0	0	0	3	0	0	0	0	0
chr10:99220451-99228163	99220451	99228163	0	0	0	0	0	0	0	0	0	0	0	0	0	0	0	0	0	0	0	0	0	0	0	0	0	0	0	2	0	0	0	0	0	0	0	1	0	0	0	0
chr10:99236439-99238146	99236439	99238146	2	0	0	0	0	0	0	0	0	0	0	1	0	0	0	1	0	0	0	0	0	0	0	0	0	0	0	0	1	0	0	0	0	0	0	0	0	0	0	0
chr10:99915849-99923154	99915849	99923154	0	0	0	0	0	0	0	1	0	0	0	1	0	0	1	0	0	1	0	0	0	0	0	0	0	0	0	2	0	0	0	0	0	0	0	0	0	0	0	0
chr10:99967857-99991444	99967857	99991444	0	0	0	0	0	0	0	0	0	0	0	0	0	0	0	0	0	0	0	0	0	0	0	0	0	0	0	0	0	0	0	4	0	0	0	0	0	0	0	0
chr11:100730284-100847702	100730284	100847702	0	0	0	0	0	0	0	0	0	0	0	0	0	0	0	0	0	0	0	0	0	0	0	0	0	0	0	0	0	0	0	0	0	0	0	4	0	0	0	0
chr11:100812514-100820687	100812514	100820687	0	0	0	0	0	0	0	0	0	0	0	0	0	0	0	0	0	0	0	0	0	0	0	0	0	0	0	0	0	0	8	0	0	0	3	0	0	0	0	0
chr11:100830613-100858323	100830613	100858323	0	0	0	0	0	0	0	0	0	0	0	0	0	0	0	0	0	0	0	0	0	0	0	0	0	0	0	0	0	0	0	0	0	0	0	2	0	0	0	0
chr11:100832414-100847702	100832414	100847702	0	0	0	0	0	0	0	0	0	0	0	0	0	0	0	0	0	0	0	0	0	0	0	0	0	0	0	0	0	0	0	0	0	4	0	0	0	0	0	0
chr11:101818761-101857772	101818761	101857772	0	0	0	0	0	0	0	0	0	0	0	0	0	0	0	0	0	0	0	0	0	0	0	0	0	0	0	0	3	0	0	0	0	0	0	0	0	0	0	0
chr11:102220608-102248629	102220608	102248629	0	0	0	0	0	0	0	0	0	0	0	0	0	0	0	0	0	0	0	0	0	0	0	0	0	0	0	0	0	0	0	0	0	0	7	0	0	0	0	0
chr11:102233626-102239279	102233626	102239279	0	0	0	0	0	0	2	1	1	0	0	0	0	0	0	0	0	1	0	0	0	0	0	2	3	5	0	1	1	12	0	0	0	0	8	4	0	0	0	0
chr11:103090643-103093815	103090643	103093815	0	0	0	0	0	0	0	0	0	0	0	0	0	0	0	0	0	0	0	0	0	0	0	0	0	0	0	0	0	0	0	0	0	4	0	0	0	0	0	0
chr11:103151076-103229087	103151076	103229087	0	0	0	0	0	0	0	0	0	0	0	0	0	0	0	0	0	0	0	0	0	0	0	0	0	0	0	0	0	0	0	0	3	0	0	0	0	0	0	0
chr11:103173821-103187349	103173821	103187349	0	0	0	0	0	0	0	0	0	0	0	0	0	0	0	0	0	0	0	0	0	0	0	0	0	0	0	0	0	0	0	0	0	0	6	0	0	0	0	0
chr11:103228970-103270600	103228970	103270600	0	0	0	0	0	0	0	0	0	0	0	0	0	0	0	0	0	0	0	0	0	0	0	0	0	0	0	0	0	0	0	0	0	0	2	0	0	0	0	0
chr11:10500072-10506586	10500072	10506586	0	0	0	0	0	0	0	0	0	1	0	0	0	0	0	0	0	0	0	0	0	0	0	0	0	0	0	0	0	0	0	0	0	2	0	0	0	0	0	0
chr11:10540580-10555752	10540580	10555752	0	0	0	0	0	0	0	0	0	0	0	0	0	1	0	0	0	0	0	0	0	0	0	0	0	0	0	0	0	0	0	0	0	2	0	0	0	0	0	0
chr11:107260799-107263621	214521598	214527242	0	1	1	2	0	0	0	0	0	0	0	0	1	0	0	0	1	0	1	0	1	0	0	0	0	0	0	0	1	0	0	0	0	5	0	2	3	0	0	0
chr11:107260799-107289013	214521598	214578026	0	0	0	0	0	0	0	0	1	0	0	0	0	1	0	0	1	0	0	0	2	0	1	1	2	3	0	1	0	2	0	0	4	8	0	0	0	0	0	0
chr11:107288919-107313775	107288919	107313775	0	0	0	0	0	0	0	0	0	0	0	0	0	0	0	0	0	0	0	0	0	0	1	0	2	0	0	0	0	0	0	0	0	0	0	0	0	0	0	0
chr11:107299524-107309909	107299524	107309909	0	0	0	0	0	0	0	0	0	0	0	0	0	0	0	0	0	0	0	0	0	0	0	0	0	0	0	0	0	0	0	0	0	0	3	0	0	0	0	0
chr11:107325175-107326502	107325175	107326502	0	0	0	0	0	0	0	0	0	0	0	0	0	0	0	0	0	0	0	0	0	0	0	0	0	0	0	0	0	0	0	0	0	0	0	0	0	0	0	9
chr11:10774218-10786278	10774218	10786278	0	0	0	0	0	0	0	0	0	0	0	0	0	0	0	0	0	0	0	0	0	0	0	0	0	0	0	0	0	0	0	0	0	3	0	0	0	0	0	0
chr11:10774218-10797180	10774218	10797180	0	0	0	0	0	0	0	0	0	0	0	0	0	0	0	0	0	0	0	0	0	0	0	0	0	0	0	0	0	0	0	0	1	2	0	0	0	0	0	0
chr11:10784977-10786278	10784977	10786278	0	0	0	0	0	0	0	0	0	0	0	0	0	0	0	0	0	0	0	0	0	0	0	0	0	0	0	0	0	0	0	0	0	0	0	3	0	0	0	0
chr11:10789352-10794820	10789352	10794820	0	0	0	0	0	0	0	0	0	0	0	0	0	0	0	0	0	0	0	0	0	0	0	0	0	0	0	0	0	0	0	0	4	0	0	0	0	0	0	0
chr11:107916996-107925682	107916996	107925682	0	1	1	0	0	1	1	0	0	0	0	0	0	1	1	1	0	0	0	0	1	0	0	0	0	1	0	0	1	0	0	6	0	1	3	1	0	0	0	0
chr11:107923386-107966418	107923386	107966418	0	0	0	0	0	0	0	0	0	0	0	0	0	0	0	0	0	0	0	0	0	0	0	0	0	0	0	0	0	0	0	0	0	6	0	0	0	0	0	0
chr11:107965117-107966418	107965117	107966418	0	0	0	0	0	0	0	0	0	0	0	0	0	0	0	0	0	0	0	0	0	0	0	0	1	0	0	0	0	0	0	0	2	4	0	0	0	0	0	0
chr11:108040470-108044578	108040470	108044578	0	0	0	0	0	0	0	0	0	0	0	0	0	0	0	0	0	0	0	0	0	0	0	0	0	0	0	1	0	0	0	0	0	0	9	0	0	0	0	0
chr11:108040470-108047817	108040470	108047817	0	0	0	0	0	0	0	0	0	0	0	0	0	0	0	0	0	0	0	0	0	1	0	0	0	0	0	0	0	0	0	0	0	0	0	3	0	0	0	0
chr11:108040470-108068147	108040470	108068147	0	0	0	0	0	0	0	0	1	0	0	0	0	0	0	0	0	0	0	0	0	0	0	0	0	0	0	0	0	0	0	0	4	0	0	0	0	0	0	0
chr11:108042925-108044578	108042925	108044578	0	1	0	0	0	0	0	1	0	0	0	0	0	0	0	0	0	0	1	0	0	0	0	1	0	0	0	0	0	3	0	4	2	5	3	0	0	0	0	0
chr11:108042925-108047817	108042925	108047817	2	0	0	1	0	1	0	0	0	1	0	0	0	0	0	2	2	0	0	2	1	0	2	1	0	0	1	1	1	3	0	0	2	4	1	3	7	0	0	0
chr11:108042925-108061227	108042925	108061227	0	0	0	0	0	0	0	0	0	0	0	0	0	0	0	0	0	0	0	0	0	0	0	0	0	0	0	0	0	0	0	0	0	0	0	2	0	0	0	0
chr11:108046972-108047817	108046972	108047817	0	0	0	0	1	0	0	0	1	0	0	0	0	0	1	0	0	0	0	0	0	1	0	0	0	0	0	0	0	0	0	4	1	0	0	0	0	0	0	0
chr11:108047720-108068147	108047720	108068147	0	0	0	0	0	0	0	0	0	0	0	0	0	0	0	0	0	0	0	0	0	0	0	0	0	0	0	0	0	0	0	0	0	0	0	0	4	0	0	0
chr11:108055958-108061227	108055958	108061227	0	0	0	0	0	0	0	0	0	0	0	0	0	0	0	0	0	0	1	0	0	0	0	0	5	0	0	1	2	0	0	0	0	3	0	7	11	0	0	0
chr11:108055958-108068147	108055958	108068147	0	0	0	0	0	0	0	0	0	0	0	0	0	0	0	0	0	0	0	0	0	0	0	0	2	0	0	0	0	0	0	0	3	3	0	0	0	0	0	0
chr11:108057208-108060057	108057208	108060057	0	0	0	0	0	0	0	0	0	0	0	0	0	0	0	0	0	0	0	0	0	0	0	0	0	0	0	0	0	0	0	0	0	0	4	0	0	0	0	0
chr11:108057208-108061227	108057208	108061227	0	0	0	0	0	0	0	0	0	0	0	0	0	0	0	0	0	0	1	0	0	0	0	0	0	0	0	0	2	0	0	0	0	0	3	1	7	0	0	0
chr11:108098321-108100050	108098321	108100050	0	1	0	0	0	0	1	0	0	0	0	0	0	0	0	0	0	0	0	0	0	2	1	0	0	1	1	0	0	4	0	0	5	0	11	1	6	0	0	0
chr11:108098321-108106561	108098321	108106561	0	0	1	0	1	0	0	1	0	0	0	0	0	0	0	0	1	0	0	0	0	1	0	0	0	0	0	0	0	0	0	0	4	11	5	1	0	0	0	0
chr11:108098321-108206688	108098321	108206688	0	0	0	0	0	0	0	0	0	2	0	0	0	0	0	0	0	0	0	0	0	0	0	0	0	0	0	0	0	0	0	0	0	0	0	1	0	0	0	0
chr11:108106396-108115753	108106396	108115753	0	0	0	0	0	0	0	0	0	0	0	0	0	0	0	0	0	0	0	0	0	0	0	0	0	0	0	0	0	0	0	0	0	0	4	0	0	0	0	0
chr11:108137897-108139336	108137897	108139336	0	0	2	0	0	0	0	0	0	0	1	0	0	0	0	0	0	0	0	1	0	0	0	0	0	0	0	0	0	0	0	0	0	0	0	0	0	0	0	0
chr11:108172374-108192147	108172374	108192147	0	0	0	0	0	0	0	0	0	0	0	0	0	0	0	0	0	0	0	0	0	0	0	0	0	0	0	0	0	0	0	0	0	3	0	2	0	0	0	0
chr11:108186549-108206688	108186549	108206688	1	0	0	0	3	0	0	0	0	0	0	0	0	0	2	1	0	1	1	0	0	1	0	0	0	0	0	0	0	0	0	0	0	0	0	0	0	0	0	0
chr11:108198371-108202764	108198371	108202764	0	0	0	0	0	0	0	0	1	0	0	0	0	0	0	0	0	1	0	0	0	0	0	0	0	0	0	0	0	0	0	0	0	1	4	0	0	0	0	0
chr11:108198371-108206688	108198371	108206688	0	0	0	0	0	0	0	0	0	0	0	0	0	0	0	0	0	1	0	0	0	0	0	0	0	0	0	0	0	3	0	0	0	0	0	0	0	0	0	0
chr11:10820538-10822194	10820538	10822194	0	0	0	0	0	0	0	0	0	0	0	0	0	0	0	0	0	0	0	0	0	0	0	0	0	1	0	0	2	0	0	0	0	0	0	0	0	0	0	0
chr11:10820538-10822634	10820538	10822634	0	0	0	0	0	0	0	0	0	0	0	0	0	0	0	0	0	0	0	0	0	0	0	0	2	0	0	0	0	1	0	0	0	0	5	2	0	0	0	0
chr11:10820538-10823982	10820538	10823982	0	0	0	0	0	0	0	0	0	0	0	0	0	0	0	0	0	0	0	0	0	0	0	0	0	0	0	0	0	0	0	0	0	4	0	3	0	0	0	0
chr11:10820538-10827594	10820538	10827594	0	0	0	0	0	0	0	0	0	0	0	0	0	0	0	0	0	0	0	0	0	0	0	0	0	0	0	0	0	0	0	0	5	0	0	0	0	0	0	0
chr11:10821978-10823756	10821978	10823756	0	0	0	0	0	0	0	0	0	0	0	0	0	0	0	0	0	0	0	0	0	0	0	0	0	0	0	0	0	2	0	0	0	0	0	0	0	0	0	0
chr11:10822277-10823756	10822277	10823756	0	0	0	0	0	0	0	0	0	0	0	0	0	0	0	0	0	1	0	0	0	0	1	0	0	0	0	0	0	0	0	0	0	4	0	0	0	0	0	0
chr11:10822277-10825137	10822277	10825137	0	0	0	0	0	0	0	0	0	0	0	0	0	0	0	0	0	0	0	0	0	0	0	0	0	0	0	0	0	0	0	0	0	0	0	2	0	0	0	0
chr11:10823595-10828928	10823595	10828928	0	0	0	0	0	0	0	0	0	0	0	0	0	0	0	0	0	0	0	0	0	0	0	0	0	0	0	0	0	4	0	0	0	0	0	0	0	0	0	0
chr11:10824576-10826562	10824576	10826562	0	0	0	0	0	0	0	0	0	0	0	0	0	0	0	0	1	0	0	0	0	0	0	0	1	1	1	1	0	8	0	9	7	29	5	12	5	0	0	0
chr11:10824576-10827594	10824576	10827594	0	0	0	0	0	0	0	0	0	0	0	0	0	0	0	0	0	0	0	0	0	1	0	0	0	4	0	0	0	0	0	0	0	1	0	10	5	0	0	0
chr11:10825026-10825750	10825026	10825750	0	0	0	0	0	0	0	0	0	0	0	0	0	0	0	0	0	0	0	0	0	0	0	0	0	2	0	0	0	0	0	0	0	0	0	3	0	0	0	0
chr11:108256646-108302565	108256646	108302565	0	0	0	0	0	0	0	0	0	0	0	0	0	0	0	0	0	0	0	0	0	0	0	0	0	0	0	0	0	3	0	0	0	0	0	0	0	0	0	0
chr11:10825683-10828928	10825683	10828928	0	0	0	0	0	0	0	0	0	0	0	0	0	0	0	0	0	0	0	0	0	0	0	0	0	0	0	0	0	0	0	0	2	0	0	0	0	0	0	0
chr11:10827453-10828928	10827453	10828928	0	0	0	0	0	0	0	0	0	0	0	0	0	0	0	0	0	0	0	0	0	0	0	0	0	0	0	0	0	0	0	0	0	0	0	2	0	0	0	0
chr11:108276155-108302565	108276155	108302565	0	0	0	0	0	0	0	1	0	0	0	0	0	0	0	1	0	0	0	0	0	0	0	0	0	0	0	0	0	0	0	0	0	2	0	0	0	0	0	0
chr11:108638663-108712203	108638663	108712203	0	0	0	0	0	0	0	0	0	0	0	0	0	0	0	0	0	0	0	0	0	0	0	0	0	0	0	0	0	0	0	0	0	4	0	0	0	0	0	0
chr11:110103961-110108377	110103961	110108377	0	0	0	0	0	0	0	0	0	0	0	0	0	0	0	0	0	0	0	0	0	0	0	0	0	0	0	0	0	0	0	0	0	2	0	0	0	0	0	0
chr11:110118427-110128914	110118427	110128914	0	0	0	0	0	0	0	0	0	0	0	0	0	0	0	0	0	0	0	0	0	0	0	0	0	0	0	0	0	0	0	0	0	0	5	1	0	0	2	0
chr11:111558724-111575863	111558724	111575863	0	0	0	0	0	0	0	0	0	0	0	0	0	0	0	0	0	0	0	0	0	0	0	0	0	0	0	0	0	0	0	0	0	0	6	0	0	0	0	0
chr11:111622882-111624301	111622882	111624301	0	0	0	3	0	0	0	0	0	0	1	0	0	0	2	1	0	0	1	1	0	0	1	0	0	0	0	0	0	0	0	0	2	0	0	2	0	0	0	0
chr11:111625222-111626174	111625222	111626174	0	0	0	0	0	0	0	0	0	0	2	0	0	1	0	0	0	0	0	1	0	0	0	0	0	0	0	0	0	0	0	0	0	1	0	1	0	0	0	0
chr11:111706887-111739459	111706887	111739459	0	0	0	0	0	0	0	0	0	0	0	0	0	0	0	0	0	0	0	0	0	0	0	0	0	0	0	0	0	0	0	0	0	4	0	0	0	0	0	0
chr11:111907996-111910121	111907996	111910121	0	0	1	1	0	0	0	0	0	0	0	0	0	0	0	0	0	0	0	0	0	0	0	0	0	0	0	0	0	0	0	0	2	0	0	1	0	0	0	0
chr11:111914189-111922073	111914189	111922073	0	0	0	0	0	0	0	0	0	0	0	0	1	0	0	0	0	0	0	0	0	0	0	0	0	1	0	0	0	5	0	0	0	0	0	0	0	0	0	0
chr11:111948938-111951282	111948938	111951282	0	0	0	1	0	0	0	0	0	0	0	0	0	0	0	0	0	0	0	0	1	0	0	0	0	0	0	0	3	0	0	0	0	0	0	0	0	0	0	0
chr11:113608293-113629428	113608293	113629428	0	0	0	0	0	0	0	0	0	0	0	0	0	0	0	0	0	0	0	0	0	0	0	0	0	2	0	0	0	0	0	0	0	0	0	0	0	0	0	0
chr11:113704141-113712490	113704141	113712490	0	0	0	0	0	0	0	0	0	0	0	0	0	0	0	0	0	0	0	0	0	0	0	0	0	0	0	0	0	0	0	0	2	0	0	0	0	0	0	0
chr11:113933932-113935290	113933932	113935290	0	0	2	1	0	0	1	0	0	0	0	1	0	0	0	0	0	0	0	0	0	0	0	0	3	2	0	0	0	0	0	0	4	0	0	0	0	0	0	3
chr11:113933932-114027156	227867864	228054312	0	0	0	0	0	0	0	0	0	0	0	0	0	0	0	0	0	0	0	0	0	0	0	0	4	0	0	1	0	0	0	0	0	0	8	0	0	0	0	0
chr11:113933932-114057760	113933932	114057760	0	1	0	0	0	0	0	0	0	0	0	0	0	0	0	0	0	1	0	0	0	0	1	0	2	0	0	2	0	0	0	0	0	0	0	1	0	0	0	0
chr11:114316700-114318601	114316700	114318601	0	0	0	0	0	0	0	0	0	0	0	0	0	0	0	0	0	0	0	0	1	0	0	0	0	0	0	0	0	0	0	0	0	0	4	0	0	0	0	0
chr11:116627861-116629123	116627861	116629123	0	0	0	0	1	0	0	0	0	0	0	0	0	0	0	0	1	0	0	0	0	0	0	0	2	0	0	0	1	0	0	0	0	8	4	1	0	0	0	0
chr11:116633268-116633982	116633268	116633982	0	0	0	0	0	0	0	0	0	0	0	0	0	0	0	0	0	0	0	0	0	0	0	0	0	0	0	0	0	0	0	0	3	0	0	0	0	0	0	0
chr11:116633268-116636162	116633268	116636162	0	0	0	0	0	0	0	0	0	0	0	0	0	0	0	0	0	0	0	0	0	0	0	0	0	2	0	0	0	0	0	0	0	0	0	0	0	0	0	0
chr11:116731989-116768033	116731989	116768033	0	0	0	0	0	0	0	0	0	0	0	0	0	0	0	0	0	0	0	0	0	0	0	0	0	0	2	0	0	0	0	0	0	0	0	0	0	0	0	0
chr11:116734383-116744352	116734383	116744352	0	0	0	0	0	0	0	0	1	0	0	0	0	0	0	0	0	0	0	0	0	0	0	0	0	0	0	1	0	3	0	0	0	0	4	4	0	0	0	0
chr11:116744196-116745983	116744196	116745983	0	0	0	0	0	0	0	0	0	0	0	0	0	0	0	0	0	0	0	0	0	0	0	0	0	0	0	0	0	0	0	0	5	0	0	0	0	0	0	0
chr11:116744196-116747079	116744196	116747079	0	0	0	0	0	0	0	0	0	0	0	0	0	0	0	0	0	0	0	0	0	0	0	0	0	0	0	0	0	0	0	0	0	0	0	0	0	0	4	0
chr11:116746193-116746581	116746193	116746581	0	0	0	0	0	0	0	0	0	0	0	0	0	0	0	0	0	0	0	0	0	0	0	0	0	0	0	0	0	0	0	0	0	1	0	0	3	0	0	0
chr11:116766968-116768033	116766968	116768033	0	0	0	0	0	0	0	0	0	0	0	0	0	0	0	0	0	0	0	0	0	0	0	0	0	0	1	0	0	6	0	0	0	3	2	2	0	0	0	0
chr11:116766968-116798096	116766968	116798096	0	0	0	0	0	0	0	0	0	0	0	0	0	0	0	0	0	0	0	1	0	0	0	0	0	0	0	0	2	2	0	0	0	0	3	0	0	0	0	0
chr11:116766968-116827780	116766968	116827780	0	0	0	0	0	0	0	0	0	0	0	0	0	0	0	0	0	0	0	0	0	0	0	0	0	0	0	1	0	0	0	0	0	0	3	0	7	4	0	0
chr11:116797934-116798096	116797934	116798096	0	0	0	0	0	0	0	0	0	0	0	0	0	0	0	0	0	0	0	0	0	0	0	0	0	2	2	2	0	0	0	0	4	3	1	0	0	0	0	0
chr11:116797934-116827780	116797934	116827780	0	0	0	0	0	0	0	0	0	0	0	0	0	0	0	0	0	0	0	0	0	0	1	0	3	2	1	2	8	9	0	0	11	24	12	6	6	0	5	0
chr11:116820848-116827780	116820848	116827780	0	0	0	0	0	0	0	0	0	0	0	0	0	0	0	0	0	0	0	0	0	0	0	0	0	0	0	3	2	0	0	3	0	6	0	5	0	0	5	0
chr11:116824759-116827780	116824759	116827780	0	0	0	0	0	0	0	0	0	0	0	0	0	0	0	0	0	0	0	0	0	0	1	0	0	1	0	1	0	0	0	8	0	0	0	2	0	0	0	0
chr11:117023156-117031977	117023156	117031977	0	0	0	0	0	0	0	0	0	0	0	0	0	0	0	0	0	1	1	0	0	0	0	0	0	0	0	0	0	5	0	0	4	0	3	2	0	0	0	0
chr11:117023156-117034608	234046312	234069216	0	1	0	2	1	0	0	1	0	0	1	0	0	0	0	2	0	1	0	0	1	1	1	0	3	0	0	2	1	10	0	8	2	1	8	12	0	0	14	0
chr11:117030649-117034608	117030649	117034608	0	0	0	0	0	0	0	0	1	0	0	0	0	0	0	0	2	0	0	0	0	0	0	0	0	0	1	1	3	0	0	0	13	0	7	1	0	0	0	0
chr11:117046835-117048729	117046835	117048729	0	0	0	0	0	0	0	0	0	0	0	0	0	0	0	0	0	0	0	0	0	0	0	0	0	2	0	0	0	0	0	0	0	0	0	0	0	0	0	0
chr11:117052131-117053522	234104262	234107044	0	0	0	1	0	0	0	0	0	0	0	0	0	0	0	0	0	0	0	0	1	0	0	0	2	0	1	2	3	0	0	0	4	3	7	9	5	0	2	0
chr11:117052131-117061005	117052131	117061005	0	0	0	0	0	0	0	0	0	0	0	0	0	0	0	0	0	0	0	0	0	0	0	0	0	0	0	0	0	0	0	0	0	0	8	0	0	0	0	0
chr11:117060117-117060646	117060117	117060646	0	0	0	0	0	0	0	0	0	0	0	0	0	0	0	0	0	0	0	0	0	0	0	0	0	0	0	1	0	0	0	0	2	1	0	0	0	0	0	0
chr11:117073717-117074600	117073717	117074600	0	0	0	0	0	0	0	0	0	0	0	0	0	0	0	0	0	0	0	0	0	0	0	0	0	0	0	0	0	0	0	0	0	2	0	0	0	0	0	0
chr11:117109316-117110576	117109316	117110576	0	1	2	0	0	0	0	1	1	1	0	0	0	0	0	0	0	0	0	1	0	0	0	0	1	2	1	0	0	1	0	0	0	0	3	0	0	0	0	0
chr11:117109316-117117664	117109316	117117664	0	0	0	0	0	0	0	0	0	0	0	0	0	0	0	0	0	0	0	0	0	0	0	0	2	0	0	0	0	0	0	1	0	0	0	0	0	0	0	0
chr11:117115160-117117664	117115160	117117664	0	0	0	0	0	0	1	0	0	0	0	0	0	0	0	0	0	1	0	0	0	0	0	0	0	0	0	0	4	0	0	14	6	0	0	0	0	0	0	0
chr11:117150623-117150975	117150623	117150975	0	0	0	0	0	0	0	0	2	0	0	0	0	0	0	1	0	0	0	1	1	0	1	1	0	2	0	1	0	0	0	0	2	1	0	1	0	0	0	0
chr11:117206320-117214993	117206320	117214993	0	0	0	0	0	0	0	0	0	0	0	0	0	0	0	0	0	0	0	0	0	0	0	0	0	0	0	2	0	0	0	0	0	0	0	0	0	0	0	0
chr11:118245610-118245944	118245610	118245944	0	0	0	0	0	0	0	0	0	0	0	0	0	0	0	0	0	0	0	0	0	0	0	0	0	1	0	0	0	4	0	0	0	0	0	0	0	0	0	0
chr11:118342376-118377361	118342376	118377361	0	0	0	0	0	0	0	0	0	0	0	0	0	0	0	0	0	0	0	0	0	0	0	0	0	0	0	0	0	0	0	0	0	0	2	0	0	0	0	0
chr11:118347519-118350953	118347519	118350953	0	0	0	0	0	0	0	0	0	0	0	0	0	0	0	0	0	0	0	0	0	0	0	0	0	0	0	0	0	0	0	0	0	0	2	2	0	0	0	0
chr11:118348681-118353210	118348681	118353210	0	0	0	0	0	0	0	0	0	0	0	0	0	0	0	0	0	0	0	0	0	0	0	0	2	0	0	0	0	1	0	0	3	0	0	1	0	0	0	0
chr11:118352429-118353210	236704858	236706420	0	0	0	0	0	0	0	0	0	0	0	0	0	0	0	0	0	1	0	0	0	0	1	0	0	0	0	0	2	0	0	1	1	1	10	1	0	5	1	0
chr11:118360506-118363945	118360506	118363945	0	0	0	0	0	0	0	0	0	0	0	0	0	0	1	0	0	0	0	0	0	0	0	0	0	0	0	1	0	0	0	0	0	4	2	0	0	7	0	0
chr11:118360506-118365482	118360506	118365482	0	0	0	0	0	0	0	0	0	0	0	0	0	0	0	0	0	0	0	0	0	0	0	0	2	0	0	0	0	0	0	0	0	0	0	0	0	0	0	0
chr11:118365002-118370135	118365002	118370135	0	0	0	0	0	0	0	0	0	1	0	0	0	0	0	0	0	0	0	0	0	0	0	0	0	0	0	0	0	0	0	0	0	0	8	1	0	3	0	0
chr11:118366414-118378324	118366414	118378324	0	0	0	0	0	0	0	0	0	0	0	0	0	0	0	0	0	0	0	0	0	0	0	0	0	0	0	0	0	0	0	0	0	0	0	0	0	0	6	0
chr11:118370628-118371692	118370628	118371692	0	0	0	0	0	0	0	0	0	0	0	0	0	0	0	0	0	0	0	0	0	0	0	0	0	0	0	0	0	0	0	0	2	0	0	0	0	0	0	0
chr11:118422500-118430579	118422500	118430579	0	0	0	0	0	0	0	0	0	0	0	0	0	0	0	0	0	1	0	0	0	0	0	0	0	0	0	0	0	0	0	0	0	0	0	1	0	2	0	0
chr11:118451960-118455359	118451960	118455359	0	0	0	1	0	0	0	0	0	0	0	0	0	0	0	0	0	1	1	0	2	1	0	1	1	1	1	1	0	0	0	5	0	0	3	5	4	0	0	0
chr11:118453893-118455359	118453893	118455359	0	0	0	0	0	0	0	0	0	0	0	0	0	0	0	0	0	0	0	0	0	3	0	0	3	0	0	0	1	0	0	0	0	6	0	2	0	0	10	0
chr11:118454523-118455359	236909046	236910718	0	0	0	0	0	0	0	0	0	0	0	0	0	0	0	0	0	1	0	0	0	0	0	0	0	0	1	1	0	3	0	0	6	0	0	2	0	0	3	0
chr11:118454523-118463571	118454523	118463571	0	0	0	0	0	0	0	0	0	0	0	0	0	0	0	0	0	0	0	0	0	0	0	0	0	0	0	0	0	0	0	4	0	0	0	1	0	0	0	0
chr11:118625413-118629611	118625413	118629611	0	0	0	0	0	0	0	0	0	0	0	0	0	0	0	0	0	0	0	0	0	2	0	0	0	0	0	0	1	0	0	0	0	0	0	0	0	0	0	0
chr11:118629482-118634015	118629482	118634015	0	0	0	0	0	0	0	0	0	0	0	0	0	0	0	0	0	0	0	0	0	0	0	0	0	0	0	1	0	1	0	0	0	1	3	0	0	0	0	0
chr11:118629482-118636063	118629482	118636063	0	0	0	0	0	0	0	0	0	0	0	0	0	0	0	0	0	0	0	0	0	0	0	0	0	0	0	0	0	0	0	0	0	0	0	3	0	0	0	0
chr11:118630630-118634015	118630630	118634015	0	0	0	0	0	0	0	0	0	0	0	0	0	0	0	0	0	0	0	0	0	0	0	0	0	1	0	0	0	0	0	0	0	0	0	3	0	0	0	0
chr11:118630630-118650445	118630630	118650445	0	0	0	0	0	0	0	0	0	0	0	0	0	0	0	0	0	0	0	0	0	0	0	0	0	0	0	0	0	0	2	0	0	0	0	0	0	0	0	0
chr11:118638930-118657227	118638930	118657227	0	0	0	0	0	0	0	0	0	0	0	0	0	0	0	0	0	0	0	1	0	0	0	0	0	0	1	0	0	0	0	0	0	5	3	2	0	0	0	0
chr11:118650340-118657227	118650340	118657227	0	0	0	0	1	0	0	0	0	1	0	0	0	0	0	0	0	0	0	2	0	0	0	1	0	1	0	0	0	0	0	0	0	0	5	0	0	0	0	0
chr11:118656760-118657227	118656760	118657227	0	0	0	0	1	0	0	0	1	0	1	2	0	0	1	0	1	1	0	0	1	0	1	1	0	3	0	0	0	3	4	0	6	2	0	10	8	8	11	0
chr11:118940943-118944661	118940943	118944661	0	0	0	0	0	0	0	0	0	0	0	0	0	0	0	0	0	0	0	0	1	0	0	0	0	1	0	1	0	0	0	0	1	0	0	2	0	0	0	0
chr11:118940943-118950010	118940943	118950010	0	0	0	0	0	0	0	0	0	0	0	0	0	0	0	0	0	0	0	0	0	0	0	0	0	0	2	0	0	0	0	0	0	0	0	0	0	0	0	0
chr11:118947528-118948357	118947528	118948357	0	0	0	0	0	0	0	0	0	0	0	0	0	0	0	0	0	0	0	0	0	0	0	0	0	0	0	0	0	2	0	0	0	0	0	0	0	0	0	0
chr11:118947606-118948357	118947606	118948357	0	0	1	0	0	0	0	0	0	0	0	0	0	0	0	0	0	0	0	0	0	0	0	0	0	0	0	1	2	0	0	0	0	0	0	0	0	0	0	0
chr11:118959982-118960374	118959982	118960374	0	0	0	0	0	0	0	0	0	0	0	0	0	0	0	0	0	0	0	0	0	0	0	0	0	0	0	0	0	0	0	0	0	2	0	0	0	0	0	0
chr11:119002244-119003929	119002244	119003929	0	0	1	0	0	0	0	0	0	0	0	0	0	2	0	0	0	1	0	1	0	0	0	0	1	0	0	2	0	0	0	0	0	0	0	0	0	0	0	0
chr11:119155678-119158656	119155678	119158656	0	0	0	0	0	0	0	0	0	0	0	0	0	0	0	0	0	0	0	0	0	0	0	0	0	0	2	0	0	0	0	0	0	0	0	0	0	0	0	0
chr11:11919143-11924889	11919143	11924889	0	0	0	0	0	0	0	0	0	0	0	0	0	0	0	0	0	0	0	0	0	0	0	0	0	0	0	0	0	0	0	0	0	0	5	0	0	0	0	0
chr11:11924809-11942041	11924809	11942041	0	0	0	0	0	0	0	0	0	0	0	0	0	0	0	0	0	0	0	0	0	0	0	0	0	0	0	0	0	0	0	0	0	1	0	0	3	0	0	0
chr11:11924809-11959919	11924809	11959919	0	0	0	0	0	0	0	0	0	0	0	0	0	0	0	0	0	0	0	0	0	0	0	0	0	0	0	0	0	0	0	0	0	0	4	0	0	0	0	0
chr11:11926945-11955482	11926945	11955482	0	0	0	0	0	0	0	0	0	0	0	0	0	0	0	0	0	0	0	0	0	0	0	0	0	0	0	0	0	0	0	0	0	2	0	0	0	0	0	0
chr11:11941702-11962095	11941702	11962095	0	0	0	0	0	0	0	0	0	0	0	0	0	0	0	0	0	0	0	0	0	0	0	0	2	0	0	0	0	0	0	0	0	0	0	0	0	0	0	0
chr11:11955377-11958057	11955377	11958057	0	0	0	0	0	0	0	0	0	0	0	0	0	0	0	0	0	0	0	0	0	0	0	0	0	0	0	0	0	0	0	0	0	0	2	0	0	0	0	0
chr11:120276826-120278532	120276826	120278532	0	0	1	0	0	0	0	0	0	0	0	0	0	0	0	0	1	0	1	1	6	4	6	4	9	4	1	6	13	1	0	6	4	11	36	15	2	10	9	0
chr11:120276826-120280159	120276826	120280159	0	0	0	0	1	0	0	0	0	0	1	1	1	0	0	3	0	1	3	2	5	4	3	2	0	0	0	1	0	3	0	0	5	0	0	7	0	0	0	0
chr11:120276826-120292561	120276826	120292561	0	0	0	0	0	0	0	0	0	0	0	0	0	0	0	0	0	0	0	0	1	0	0	0	0	1	0	2	0	0	0	0	2	2	0	1	0	0	0	0
chr11:120276826-120295124	120276826	120295124	0	0	0	0	0	0	0	0	0	0	0	0	0	0	0	0	0	0	0	1	1	0	0	0	0	2	0	0	0	5	0	2	0	0	0	0	0	0	0	0
chr11:120276826-120300540	120276826	120300540	0	0	0	0	0	0	0	0	0	0	0	0	0	0	0	0	0	0	0	0	0	0	0	0	0	1	0	1	0	0	0	0	0	0	6	4	0	0	0	0
chr11:120276826-120302620	240553652	240605240	1	0	0	0	0	0	0	0	0	0	0	0	0	0	0	0	0	0	1	0	1	0	1	0	0	1	1	4	3	8	0	0	0	8	4	5	0	0	5	0
chr11:120276826-120308091	240553652	240616182	0	0	0	0	0	0	0	0	0	0	0	0	0	0	0	0	0	0	0	0	0	0	0	0	3	8	0	3	0	1	0	5	2	6	1	6	0	0	0	0
chr11:120276826-120349098	120276826	120349098	0	0	0	0	0	0	0	0	0	0	0	0	0	0	0	0	0	0	0	0	0	0	0	0	0	0	0	0	2	0	0	0	0	0	0	0	0	0	0	0
chr11:120278446-120295124	120278446	120295124	0	0	0	0	0	0	0	0	0	0	0	0	0	0	0	0	0	0	0	0	0	0	0	0	0	0	0	0	0	0	0	0	0	0	0	0	0	0	4	0
chr11:120278446-120300226	120278446	120300226	0	0	0	0	0	0	0	0	0	0	0	0	0	0	0	0	0	0	0	0	0	0	0	0	2	0	0	0	0	0	0	0	0	0	0	0	1	0	0	0
chr11:120278446-120300540	240556892	240601080	0	0	0	0	0	0	0	0	0	0	0	0	0	0	0	0	0	0	0	0	2	0	1	0	9	3	3	2	7	16	6	11	27	35	38	19	16	0	4	27
chr11:120278446-120302620	120278446	120302620	0	0	0	0	0	0	0	0	0	0	0	0	0	0	0	0	0	0	0	0	0	0	0	0	0	0	0	0	0	0	0	0	0	0	0	1	7	0	0	0
chr11:120278446-120308091	120278446	120308091	0	0	0	0	0	0	0	0	0	0	0	0	0	0	0	0	0	0	0	0	0	0	0	0	0	0	0	0	0	0	4	6	0	2	1	1	1	0	0	0
chr11:120278446-120310930	120278446	120310930	0	0	0	0	0	0	0	0	0	0	0	0	0	0	0	0	0	0	0	0	0	0	0	0	0	3	0	0	0	2	0	0	0	0	3	0	0	0	0	0
chr11:120278446-120316173	120278446	120316173	0	0	0	0	0	0	0	0	0	0	0	0	0	0	0	0	0	0	0	0	0	0	0	1	3	8	0	0	1	2	7	0	6	17	7	1	0	6	0	10
chr11:120278446-120317217	120278446	120317217	0	0	0	0	0	0	0	0	0	0	0	0	0	0	0	0	0	0	0	0	0	0	0	0	0	0	0	0	0	0	0	0	0	2	0	0	0	0	0	0
chr11:120278446-120317794	240556892	240635588	0	0	0	0	0	0	0	0	0	0	0	0	0	0	0	0	0	0	0	1	1	1	1	1	7	3	0	2	2	4	0	4	18	6	17	13	0	0	5	0
chr11:120278446-120322433	120278446	120322433	0	0	0	0	0	0	0	0	0	0	0	0	0	0	0	0	0	0	0	0	0	0	1	0	0	0	0	0	0	0	0	0	0	4	0	0	0	0	0	0
chr11:120278446-120348235	120278446	120348235	0	0	0	0	0	0	0	0	0	0	0	0	0	0	0	0	0	0	0	0	0	1	0	0	0	0	1	1	0	3	0	7	3	15	13	8	6	0	0	0
chr11:120280102-120308091	120280102	120308091	0	0	0	0	0	0	0	0	0	0	0	0	0	0	0	0	0	0	0	0	0	0	0	0	0	0	0	0	0	0	0	0	0	4	0	0	0	0	0	0
chr11:120291461-120295124	120291461	120295124	0	0	0	0	0	0	0	0	0	0	0	0	0	0	0	0	0	0	0	0	0	0	0	0	0	0	0	0	0	0	0	0	0	3	0	0	0	0	0	0
chr11:120291461-120300540	120291461	120300540	0	0	0	0	0	0	0	0	0	0	0	0	0	0	0	0	0	0	0	0	0	0	0	0	3	1	0	0	4	0	0	0	0	6	3	3	5	0	0	0
chr11:120291461-120302620	120291461	120302620	0	0	0	0	0	0	0	0	0	0	0	0	0	0	0	0	0	0	0	0	1	0	0	0	2	0	1	0	0	0	0	0	1	0	0	0	0	0	0	0
chr11:120291461-120308091	120291461	120308091	0	0	0	0	0	0	0	0	0	0	0	0	0	0	0	0	0	0	0	0	0	0	0	0	0	0	0	0	0	0	0	0	0	0	2	1	0	0	0	0
chr11:120291461-120316173	120291461	120316173	0	0	0	0	0	0	0	0	0	0	0	0	0	0	0	0	0	0	0	0	0	0	0	0	0	1	0	0	0	0	0	0	0	6	0	0	0	0	0	0
chr11:120291461-120317794	120291461	120317794	0	0	0	0	0	0	0	0	0	0	0	0	0	0	0	0	0	0	0	0	1	0	1	0	0	1	0	2	1	7	0	0	9	3	6	0	9	0	0	0
chr11:120291461-120319923	120291461	120319923	0	0	0	0	0	0	0	0	0	0	0	0	0	0	0	0	0	0	0	0	0	0	0	0	0	0	0	0	0	0	0	0	0	3	0	0	0	0	0	0
chr11:120291461-120348235	120291461	120348235	0	0	0	0	0	0	0	0	0	0	0	0	0	0	0	0	0	0	0	0	2	0	1	0	4	1	0	0	3	0	0	0	2	0	2	2	0	0	6	0
chr11:120292511-120300540	120292511	120300540	0	0	0	0	0	0	0	0	0	0	0	0	0	0	0	0	0	0	0	0	0	0	1	0	1	0	0	0	0	0	0	0	0	2	0	5	4	0	0	0
chr11:120295066-120300540	120295066	120300540	0	0	0	0	0	0	0	0	0	0	0	0	0	0	0	0	0	0	0	0	0	0	0	0	0	0	0	0	0	0	0	0	0	0	2	0	0	0	0	0
chr11:120295066-120302620	120295066	120302620	0	0	0	0	0	0	0	0	0	0	0	0	0	0	0	0	0	0	0	0	0	0	0	0	0	0	0	0	0	0	0	0	0	2	0	1	0	0	0	0
chr11:120295066-120308091	120295066	120308091	0	0	0	0	0	0	0	0	0	0	0	0	0	0	0	0	0	1	0	0	0	0	0	0	0	0	0	0	2	0	0	0	0	0	1	0	2	1	0	0
chr11:120295066-120316173	120295066	120316173	0	0	0	0	0	0	0	0	0	0	0	0	0	0	0	0	0	0	0	0	0	0	0	0	0	0	0	0	0	0	0	0	0	2	0	0	0	0	0	0
chr11:120300420-120336071	120300420	120336071	0	0	0	0	0	0	0	0	0	0	0	0	0	0	0	0	0	0	0	0	0	0	0	0	0	0	0	0	0	4	0	0	0	0	0	0	0	0	0	0
chr11:120302479-120308091	120302479	120308091	0	0	0	0	0	0	0	0	0	0	0	0	0	0	0	0	2	0	0	0	0	0	1	0	8	1	2	2	2	3	0	2	4	0	6	3	9	0	0	0
chr11:120302479-120343836	120302479	120343836	0	0	0	0	0	0	0	0	0	0	0	0	0	0	0	0	0	0	0	0	0	0	0	0	0	1	0	2	0	0	0	0	0	0	0	0	0	0	0	0
chr11:120308016-120310930	120308016	120310930	0	0	0	0	0	0	0	0	0	0	0	0	0	0	0	0	0	0	0	0	0	0	0	0	0	0	0	0	0	0	0	0	0	0	7	0	0	0	0	0
chr11:120308016-120316173	120308016	120316173	0	0	0	0	0	0	0	0	0	0	0	0	0	0	0	0	0	0	0	0	0	1	0	0	1	0	0	0	0	0	0	0	0	5	0	1	0	0	0	0
chr11:120308016-120317794	120308016	120317794	0	0	0	0	0	0	0	0	0	0	0	0	0	0	0	0	0	0	0	0	0	0	0	0	0	1	0	0	0	0	0	0	0	0	0	2	0	0	0	0
chr11:120308016-120327959	120308016	120327959	0	0	0	0	0	0	0	0	0	0	0	0	0	0	0	0	0	0	0	0	0	0	0	0	0	0	0	0	0	0	0	0	0	5	0	0	0	0	0	0
chr11:120310837-120312911	120310837	120312911	0	0	0	0	0	0	0	0	0	0	0	0	0	0	0	0	0	0	0	0	0	0	1	0	0	0	0	0	0	0	0	2	0	0	0	0	0	0	5	0
chr11:120310837-120316173	120310837	120316173	0	0	0	0	0	0	0	1	0	0	0	0	0	0	0	0	0	0	0	0	0	0	4	2	6	1	2	3	1	10	6	5	6	26	5	9	1	5	3	0
chr11:120310837-120317217	120310837	120317217	0	0	0	0	0	0	0	0	0	0	0	0	0	0	0	0	0	0	0	0	0	0	0	0	0	0	0	0	1	0	0	0	0	2	2	1	0	0	0	0
chr11:120310837-120317794	120310837	120317794	0	0	0	0	0	0	0	0	0	0	0	0	0	1	0	0	1	1	0	0	1	0	2	1	5	3	0	3	10	12	0	0	12	21	12	24	3	11	18	0
chr11:120310837-120319923	240621674	240639846	0	0	0	0	0	0	0	0	0	0	0	0	0	0	0	0	0	0	0	0	0	0	0	0	0	1	0	0	2	2	0	0	7	10	0	7	0	0	6	0
chr11:120310837-120331466	120310837	120331466	0	0	0	0	0	0	0	0	0	0	0	0	0	0	0	0	0	0	0	0	0	0	0	0	3	1	0	0	0	10	0	0	1	0	1	1	0	0	0	0
chr11:120310837-120340097	120310837	120340097	0	0	0	0	0	0	0	0	0	0	0	0	0	0	0	0	0	0	0	0	0	0	0	0	0	0	0	0	0	0	0	3	0	0	0	2	0	0	0	0
chr11:120310837-120348235	120310837	120348235	0	0	0	0	0	0	0	0	0	0	0	0	0	0	0	0	0	0	2	0	3	1	3	3	4	3	2	5	10	0	16	0	0	14	4	8	1	4	0	0
chr11:120312415-120318615	120312415	120318615	0	0	0	0	0	0	0	0	0	0	0	0	0	0	0	0	0	0	0	0	0	0	0	0	0	0	0	0	0	0	0	0	0	0	0	4	0	0	0	0
chr11:120312812-120317794	120312812	120317794	0	0	0	0	0	0	0	0	0	0	0	0	0	0	0	0	0	0	0	0	0	0	1	0	0	0	0	0	0	4	0	0	0	0	0	0	0	0	0	0
chr11:120312812-120319057	120312812	120319057	0	0	0	0	0	0	0	0	0	0	0	0	0	0	0	0	0	0	0	0	0	0	0	0	0	0	0	0	0	3	0	0	0	0	0	0	0	0	0	0
chr11:120312812-120330029	120312812	120330029	0	0	0	0	0	0	0	0	0	0	0	0	0	0	0	0	0	0	0	0	0	0	0	0	0	0	0	0	0	5	0	0	0	0	0	0	0	0	0	0
chr11:120312812-120346216	120312812	120346216	0	0	0	0	0	0	0	0	0	0	0	0	0	0	0	0	0	0	0	0	0	0	0	0	0	3	0	0	0	0	0	0	0	0	0	0	0	0	0	0
chr11:120316130-120331466	120316130	120331466	0	0	0	0	0	0	0	0	0	0	0	0	0	0	0	0	0	0	0	0	0	0	0	0	0	0	0	0	0	0	0	0	0	0	7	0	2	0	0	0
chr11:120317111-120317794	120317111	120317794	0	0	0	0	0	0	0	0	0	0	0	0	0	0	0	0	0	0	0	0	0	0	0	0	0	0	0	0	0	0	0	0	0	0	0	0	0	0	2	0
chr11:120317111-120319923	120317111	120319923	0	0	0	0	0	0	0	0	0	0	0	0	0	0	0	0	0	0	0	0	0	0	1	0	0	0	0	0	2	0	0	0	0	4	0	0	0	9	0	0
chr11:120317111-120327959	120317111	120327959	0	0	0	0	0	0	0	0	0	0	0	0	0	0	0	0	0	0	0	0	0	0	0	0	0	0	0	0	0	0	0	0	0	0	0	0	2	0	0	0
chr11:120317111-120330029	120317111	120330029	0	0	0	0	0	0	0	0	0	0	0	0	0	0	0	0	0	0	0	0	0	0	0	0	0	0	0	0	0	5	0	2	6	12	0	0	0	0	6	0
chr11:120317111-120338017	120317111	120338017	0	0	0	0	0	0	0	0	0	0	0	0	0	0	0	0	0	0	0	0	1	0	1	0	0	1	0	1	1	2	0	0	5	7	6	7	0	0	0	0
chr11:120317111-120340097	120317111	120340097	0	0	0	0	0	0	0	0	0	0	0	0	0	0	0	0	0	0	0	0	0	0	0	0	0	0	0	0	0	0	0	0	0	2	2	1	0	0	0	0
chr11:120317111-120343836	120317111	120343836	0	0	0	0	1	0	0	0	0	0	0	0	0	0	0	0	0	0	0	0	1	0	0	1	0	0	0	0	2	2	0	3	0	10	8	3	0	0	0	0
chr11:120317111-120345344	120317111	120345344	0	0	0	0	0	0	0	0	0	0	0	0	0	0	0	0	0	0	0	0	0	0	0	0	0	0	0	0	0	0	0	0	0	0	4	0	0	0	2	0
chr11:120317111-120346216	120317111	120346216	0	0	0	0	0	0	0	0	0	0	0	0	0	0	0	0	0	0	0	0	0	0	0	0	0	0	0	0	0	4	0	0	0	1	0	0	0	0	0	0
chr11:120317656-120343836	120317656	120343836	0	0	0	0	0	0	0	0	0	0	0	0	0	0	0	0	0	0	0	0	0	0	0	0	0	0	0	0	0	0	0	0	0	0	0	0	0	3	0	0
chr11:120318582-120319923	120318582	120319923	0	0	0	0	0	0	0	0	0	0	0	0	0	0	0	0	0	0	0	0	0	0	0	0	0	0	0	0	1	2	0	0	0	0	0	3	0	0	0	0
chr11:120318582-120330029	120318582	120330029	0	0	0	0	0	0	0	0	0	0	0	0	0	0	0	0	0	0	0	0	0	0	0	0	4	2	0	1	2	3	0	3	12	2	18	0	0	0	0	0
chr11:120318582-120331466	120318582	120331466	0	0	0	0	0	0	0	0	0	0	0	0	0	0	0	0	0	0	0	0	0	0	0	0	0	0	0	0	0	0	0	0	3	0	0	3	4	0	0	0
chr11:120318582-120336071	120318582	120336071	0	0	0	0	0	0	0	0	0	0	0	0	0	0	0	1	0	0	0	0	0	0	0	0	0	0	0	0	0	0	0	1	5	0	0	0	0	0	0	0
chr11:120318582-120338017	240637164	240676034	0	0	0	0	0	0	0	0	0	0	0	0	0	0	0	0	0	0	0	0	2	1	0	0	0	2	1	4	4	4	10	0	13	10	19	6	4	0	4	13
chr11:120318582-120340097	120318582	120340097	0	0	0	0	0	0	0	0	0	0	0	0	0	0	0	0	0	0	0	0	1	0	0	1	1	0	1	0	0	0	0	0	0	4	2	2	3	0	11	0
chr11:120318582-120343836	120318582	120343836	0	0	0	0	0	0	0	0	0	0	0	0	0	0	0	0	0	0	0	0	0	0	1	0	0	1	0	2	2	2	0	0	4	5	16	2	5	0	0	0
chr11:120318942-120328943	120318942	120328943	0	0	0	0	0	0	0	0	0	0	0	0	0	0	0	0	0	0	0	0	0	0	0	0	0	0	0	0	0	0	0	0	3	0	0	0	0	0	0	0
chr11:120318942-120330029	120318942	120330029	0	0	0	0	0	0	0	0	0	0	0	0	0	0	0	0	0	0	0	0	0	0	0	0	0	0	0	0	0	0	12	0	2	8	0	0	0	0	0	0
chr11:120318942-120331466	120318942	120331466	0	0	0	0	0	0	0	0	0	0	0	0	0	0	0	0	0	0	0	0	0	0	0	0	0	0	0	0	0	3	0	1	0	0	0	0	0	0	0	0
chr11:120318942-120336071	120318942	120336071	0	0	0	0	0	0	0	0	0	0	0	0	0	0	0	0	0	0	0	0	0	0	0	0	0	0	0	0	0	0	0	0	0	6	0	0	0	0	0	0
chr11:120318942-120346216	120318942	120346216	0	0	0	0	0	0	0	0	0	0	0	0	0	0	0	0	0	0	0	0	0	0	0	0	0	0	0	0	0	0	0	0	3	7	0	0	0	0	0	0
chr11:120319817-120331466	120319817	120331466	0	0	0	0	0	0	0	0	0	0	0	0	0	0	0	0	0	0	0	0	0	0	0	0	0	0	0	0	0	0	0	0	0	0	4	0	0	0	0	0
chr11:120322220-120327959	120322220	120327959	0	0	0	0	0	0	0	0	0	0	0	0	0	0	0	0	0	0	0	0	0	0	0	0	0	0	1	0	1	0	0	0	0	0	0	2	0	0	4	0
chr11:120322220-120330029	120322220	120330029	0	0	0	0	0	0	0	0	0	0	0	0	0	0	0	0	0	0	0	0	0	0	0	0	0	0	0	0	0	1	0	0	0	0	4	4	0	0	0	0
chr11:120322220-120331466	120322220	120331466	0	0	0	0	0	0	0	0	0	0	0	0	0	0	0	0	0	0	0	0	0	0	0	0	0	0	0	0	0	1	2	0	0	0	2	0	0	0	0	0
chr11:120322220-120338017	120322220	120338017	0	0	0	0	0	0	0	0	0	0	0	0	0	0	0	0	0	0	0	0	0	0	0	0	0	0	0	0	0	0	0	0	0	3	0	2	0	0	0	9
chr11:120327826-120328943	120327826	120328943	0	0	0	0	0	0	0	0	0	0	0	0	0	0	0	0	0	0	0	0	0	0	0	0	0	0	0	0	0	0	0	6	0	0	0	0	0	0	0	0
chr11:120327826-120330029	120327826	120330029	0	0	0	0	0	0	0	0	0	0	0	0	0	0	0	0	0	0	0	0	0	0	0	0	0	0	0	0	0	0	13	1	0	4	3	1	0	0	6	0
chr11:120327826-120331466	120327826	120331466	0	0	0	0	0	0	0	0	0	0	0	0	0	0	0	0	0	0	0	0	0	0	0	0	0	0	0	0	0	0	0	0	1	2	4	1	0	0	0	0
chr11:120327826-120336071	120327826	120336071	0	0	0	0	0	0	0	0	0	0	0	0	0	0	0	0	0	0	0	0	0	0	0	0	0	0	0	0	0	0	9	0	0	0	5	1	2	0	0	0
chr11:120327826-120338017	120327826	120338017	0	0	0	0	0	0	0	0	0	0	0	0	0	0	0	0	0	0	0	0	0	0	0	0	0	0	0	0	0	0	0	4	0	3	5	1	0	0	7	0
chr11:120327826-120343836	120327826	120343836	0	0	0	0	0	0	0	0	0	0	0	0	0	0	0	0	0	0	0	0	0	0	0	0	0	0	0	1	1	0	0	0	0	0	0	3	0	0	0	0
chr11:120327826-120348235	120327826	120348235	0	0	0	0	0	0	0	0	0	0	0	0	0	0	0	0	0	0	0	0	0	0	0	0	0	0	0	0	0	0	0	0	0	3	0	0	0	0	0	0
chr11:120328429-120330029	120328429	120330029	0	0	0	0	0	0	0	0	0	0	0	0	0	0	0	0	0	0	0	0	0	0	0	0	0	0	0	0	0	0	0	0	0	6	0	0	0	0	0	0
chr11:120328429-120338017	120328429	120338017	0	0	0	0	0	0	0	0	0	0	0	0	0	0	0	0	0	0	0	0	0	0	0	0	0	1	0	0	2	0	0	0	3	0	7	2	0	0	0	0
chr11:120328429-120343836	120328429	120343836	0	0	0	0	0	0	0	0	0	0	0	0	0	0	0	0	0	0	0	0	2	0	0	0	4	1	0	1	5	0	0	0	8	0	0	8	4	9	1	0
chr11:120331380-120348235	120331380	120348235	0	0	0	0	0	0	0	0	0	0	0	0	0	0	0	0	0	0	0	0	0	0	0	0	0	0	0	0	0	3	7	0	3	6	0	0	3	0	0	0
chr11:120335945-120338017	120335945	120338017	0	0	0	0	0	0	0	0	0	0	0	0	0	2	0	0	0	0	0	0	0	0	0	0	3	3	0	1	0	0	0	3	7	2	0	4	0	5	0	0
chr11:120335945-120343836	120335945	120343836	0	0	0	0	0	0	0	0	0	0	0	0	0	0	0	0	0	0	0	0	0	0	0	1	1	2	0	6	1	2	0	0	4	13	1	16	4	0	0	0
chr11:120337902-120348235	120337902	120348235	0	0	0	0	0	0	0	0	0	0	0	0	0	0	0	0	0	0	0	0	0	0	0	0	0	0	0	0	0	0	0	0	0	0	3	0	0	0	0	0
chr11:120339996-120348235	240679992	240696470	1	0	0	0	0	0	0	0	0	0	0	0	0	0	0	0	1	0	1	0	1	4	3	2	8	3	4	5	13	10	1	4	15	29	37	22	10	4	14	2
chr11:120343758-120348235	240687516	240696470	0	0	0	0	0	1	0	0	0	0	1	1	0	0	0	1	1	1	3	1	10	1	6	4	15	15	4	11	40	14	0	4	35	72	59	57	50	2	41	0
chr11:120345268-120348235	120345268	120348235	0	1	0	1	0	0	0	0	0	0	2	0	1	0	1	0	5	1	4	1	6	3	4	8	13	12	3	16	24	34	14	22	32	58	38	34	16	3	11	1
chr11:120345268-120349098	120345268	120349098	0	0	0	0	0	0	0	0	0	0	0	0	0	0	0	0	0	0	0	0	0	0	0	2	0	0	0	0	0	0	0	0	0	0	0	0	0	0	0	0
chr11:120346048-120348235	240692096	240696470	0	0	0	0	0	1	0	0	0	0	0	0	0	0	1	0	2	0	0	2	0	0	0	0	2	14	3	3	13	7	1	1	20	19	43	30	9	7	11	0
chr11:120347369-120348235	240694738	240696470	0	0	0	0	0	0	0	0	0	0	0	1	0	0	0	0	1	0	1	0	5	4	3	3	6	4	0	2	17	9	0	3	18	27	14	14	5	0	8	0
chr11:120351968-120352285	120351968	120352285	0	0	0	0	0	0	0	0	0	0	0	0	0	0	0	0	0	0	0	0	1	0	0	0	0	0	1	0	0	0	0	0	0	0	0	6	2	0	0	0
chr11:120906441-120930794	120906441	120930794	0	0	0	0	0	0	0	0	0	1	0	0	0	0	0	0	0	0	0	0	0	0	0	0	0	0	0	0	0	0	0	0	0	2	0	0	0	0	0	0
chr11:120916382-120924441	120916382	120924441	0	0	0	0	0	0	0	0	0	0	0	1	0	0	0	0	0	0	0	1	0	0	1	0	0	1	1	0	0	0	0	0	0	5	0	0	0	0	0	0
chr11:120916382-120926017	120916382	120926017	0	1	0	0	0	0	0	0	0	0	0	1	0	0	0	0	0	0	0	0	0	0	0	0	3	0	0	1	0	0	8	0	2	8	3	3	0	0	0	1
chr11:120916382-120930794	120916382	120930794	1	2	0	3	2	0	1	1	0	1	0	2	2	0	0	0	0	0	1	1	1	1	3	0	7	9	0	4	5	4	1	8	15	24	55	15	6	5	4	6
chr11:120924259-120930794	120924259	120930794	0	0	0	0	0	0	0	0	0	0	0	0	0	0	0	0	0	0	0	0	0	0	0	0	0	0	0	0	0	0	0	0	0	1	0	0	3	0	0	0
chr11:120925760-120926017	120925760	120926017	0	0	0	0	0	0	0	0	0	0	0	0	0	0	0	0	0	0	0	0	0	0	0	0	0	0	0	0	0	3	0	0	0	1	0	0	0	0	0	0
chr11:120928216-120930794	120928216	120930794	0	0	0	0	0	0	0	0	0	0	0	0	0	0	0	0	0	0	0	0	0	0	0	0	0	0	0	0	0	0	0	0	2	0	0	0	0	0	0	0
chr11:120976539-121033079	120976539	121033079	0	0	0	0	0	0	0	0	0	0	0	0	0	0	0	0	0	0	0	0	0	0	0	0	0	0	0	0	0	0	0	0	0	0	4	1	0	0	0	0
chr11:120998460-121008731	120998460	121008731	0	0	0	0	0	0	0	0	0	0	0	0	0	0	0	0	0	0	0	0	0	0	0	0	0	0	0	0	0	0	0	0	0	5	0	0	0	0	0	0
chr11:121035981-121039634	121035981	121039634	0	0	0	0	0	0	0	0	0	0	0	0	0	0	0	0	0	0	0	0	0	0	0	0	0	0	0	0	3	0	0	3	0	0	0	0	0	0	0	0
chr11:121038762-121039634	121038762	121039634	0	0	0	0	0	0	0	0	0	0	0	0	0	0	0	0	0	0	0	0	0	0	0	0	0	0	0	0	0	0	0	0	0	0	0	0	0	0	12	0
chr11:12183625-12237866	12183625	12237866	0	0	0	0	0	0	0	0	0	0	0	0	0	0	0	0	0	0	0	0	0	0	0	0	0	0	2	0	0	0	0	0	0	0	0	0	0	0	0	0
chr11:12225796-12237866	12225796	12237866	0	0	0	0	0	0	1	0	0	0	0	0	0	0	0	0	0	1	1	0	0	0	1	1	0	0	0	0	1	0	0	0	0	0	0	4	0	0	2	0
chr11:12225796-12281444	12225796	12281444	0	0	0	0	0	0	0	0	0	0	0	0	0	0	0	0	0	0	0	0	0	0	0	0	0	0	0	0	0	0	0	0	0	2	0	0	0	0	0	0
chr11:12229569-12248678	12229569	12248678	0	0	0	0	0	0	0	0	0	0	0	0	0	0	0	0	0	0	0	0	0	0	0	0	0	0	0	0	0	0	0	0	0	0	4	0	0	0	0	0
chr11:12247717-12248678	12247717	12248678	0	0	0	0	0	0	0	0	0	0	0	0	0	0	0	0	0	0	0	1	1	0	0	0	0	0	0	0	0	0	0	0	0	0	0	3	0	0	0	0
chr11:12247717-12261132	12247717	12261132	0	0	0	0	0	0	0	0	0	0	0	0	0	0	0	0	0	0	0	0	0	0	0	0	3	0	0	0	0	0	0	0	0	0	0	0	0	0	0	0
chr11:12260982-12281444	12260982	12281444	0	0	0	0	0	0	0	0	0	0	0	0	0	0	0	0	0	0	0	0	0	0	0	0	0	0	0	0	0	0	0	0	0	0	0	0	2	0	0	0
chr11:12260982-12284084	12260982	12284084	0	0	0	0	0	0	0	0	0	0	0	0	0	0	0	0	0	0	0	0	0	0	0	0	0	0	0	0	3	0	0	0	0	0	0	0	0	0	0	0
chr11:12270730-12281444	12270730	12281444	0	0	0	0	0	0	0	0	0	0	0	0	0	0	0	0	0	0	0	0	0	0	0	0	0	0	0	0	2	0	0	0	0	0	0	0	0	0	0	0
chr11:12278331-12281444	12278331	12281444	0	0	0	0	0	0	0	0	0	0	0	0	0	0	0	0	0	0	0	0	0	0	0	0	1	0	0	0	0	0	0	0	0	0	0	0	0	0	4	0
chr11:122928959-122930736	122928959	122930736	0	0	0	0	0	0	0	0	0	0	0	0	0	0	0	0	0	0	0	0	0	0	0	0	0	0	0	0	0	0	0	0	0	0	5	0	0	0	0	0
chr11:122928959-122932037	122928959	122932037	0	0	0	0	0	0	0	0	0	0	0	0	0	0	0	0	0	0	0	0	0	0	0	0	0	0	0	0	0	0	0	0	0	4	0	0	0	0	0	0
chr11:124824619-124875108	124824619	124875108	0	0	0	0	0	1	0	0	0	0	0	0	0	0	0	0	0	0	0	1	0	0	0	1	0	0	0	0	0	0	0	0	0	0	4	0	0	0	0	0
chr11:124856637-124863139	124856637	124863139	0	0	0	0	0	0	0	0	0	0	0	0	0	0	0	0	0	1	0	0	0	0	0	0	0	2	0	1	0	0	0	0	0	0	0	0	4	0	0	7
chr11:124856637-124875108	124856637	124875108	0	1	0	0	0	0	0	0	0	0	0	0	0	0	0	0	0	0	0	2	1	0	0	1	0	0	0	1	2	2	0	1	0	6	3	0	0	0	0	0
chr11:124856637-124908965	124856637	124908965	0	0	0	0	0	0	0	0	0	0	0	0	0	0	0	0	0	0	0	0	0	0	0	0	0	0	0	0	0	0	0	0	0	0	0	2	0	0	0	0
chr11:124861356-124875108	124861356	124875108	0	0	0	0	0	0	0	0	0	0	0	0	0	0	0	0	0	0	0	0	0	0	1	0	0	0	0	0	0	0	0	0	3	0	0	0	1	0	0	0
chr11:124873762-124875108	124873762	124875108	0	0	0	1	0	0	0	0	1	0	0	0	0	0	0	0	0	0	0	0	0	0	0	0	0	0	0	0	0	0	0	5	0	0	0	0	0	0	0	0
chr11:125499126-125507439	125499126	125507439	0	0	0	0	0	0	0	0	0	0	0	0	0	0	0	0	0	0	0	0	0	0	0	0	0	0	0	0	0	0	0	0	3	0	0	0	0	0	0	0
chr11:125505323-125514538	125505323	125514538	0	0	0	0	0	0	0	0	0	0	0	0	0	0	0	0	0	0	0	0	0	0	0	0	0	0	0	0	2	0	0	0	0	0	0	0	0	0	0	0
chr11:126142863-126143349	126142863	126143349	2	0	1	0	0	0	0	0	0	1	0	0	0	0	0	0	0	0	0	0	0	0	0	0	0	0	0	0	0	0	0	0	0	0	0	0	0	0	0	0
chr11:126275990-126279306	126275990	126279306	0	2	0	0	0	0	0	0	0	0	0	0	0	0	0	0	0	0	0	0	0	0	0	0	0	0	0	0	0	0	0	0	0	0	0	0	0	0	0	0
chr11:12901254-12923660	12901254	12923660	0	0	0	0	0	0	0	0	0	0	0	0	0	0	0	0	0	0	0	0	0	0	0	0	0	0	0	0	0	0	0	0	0	0	7	0	0	0	0	0
chr11:129812320-129814907	129812320	129814907	0	0	0	0	0	0	0	0	0	0	0	0	0	0	0	0	0	0	0	0	0	0	0	0	0	0	0	0	0	0	0	0	0	0	3	0	0	0	0	0
chr11:129979323-129980556	129979323	129980556	0	0	1	1	0	0	0	0	1	0	0	0	0	0	0	0	1	0	0	0	1	0	0	0	0	0	0	0	4	0	0	0	2	0	2	3	0	0	0	0
chr11:129979323-129991705	129979323	129991705	0	0	0	0	0	0	0	0	0	0	0	0	0	0	0	0	0	0	0	0	0	0	0	0	0	0	0	0	0	0	0	0	0	0	3	0	0	0	0	0
chr11:129979323-129992408	129979323	129992408	0	0	1	1	0	0	0	0	0	0	1	0	0	0	0	0	0	0	0	0	0	0	0	2	2	0	2	0	0	0	0	0	0	1	2	0	0	0	0	0
chr11:129979323-130005610	129979323	130005610	0	0	0	0	0	0	0	0	0	0	0	0	0	0	0	0	0	0	0	0	0	0	0	0	0	0	0	0	0	0	0	0	0	3	0	0	0	0	0	0
chr11:129990600-129992408	129990600	129992408	0	0	0	0	0	0	0	0	0	0	0	0	0	0	0	0	0	0	0	0	0	0	0	0	0	0	0	0	0	0	0	0	0	0	5	1	0	0	0	0
chr11:129990600-130000061	129990600	130000061	0	0	0	0	0	0	0	0	0	0	0	0	0	0	0	0	0	0	0	0	0	0	0	0	0	0	0	0	0	0	0	0	0	2	1	0	0	0	0	0
chr11:129991508-130000061	129991508	130000061	0	0	0	0	0	0	0	0	0	0	0	0	0	0	0	0	0	0	0	0	0	0	0	0	0	0	0	0	4	0	0	0	0	0	0	0	0	0	0	0
chr11:129996594-130000061	129996594	130000061	0	0	0	0	0	0	0	0	0	0	0	0	0	2	0	0	0	0	0	0	0	0	0	0	0	0	0	0	0	0	0	0	0	0	0	2	0	0	0	0
chr11:129996594-130003623	129996594	130003623	0	0	0	0	0	0	0	0	0	0	0	0	0	0	0	0	0	0	0	0	0	0	0	0	0	0	1	0	0	3	0	0	0	0	0	0	0	0	0	0
chr11:129996594-130005610	129996594	130005610	0	0	0	0	0	0	0	0	0	0	0	0	0	0	0	0	0	0	0	0	0	0	0	0	0	0	0	0	0	0	0	6	0	0	0	0	0	0	0	0
chr11:130058008-130058834	130058008	130058834	0	0	0	0	0	0	0	0	0	0	0	0	0	0	0	0	0	0	0	0	0	0	0	0	0	0	0	0	0	0	0	0	0	2	0	0	0	0	0	0
chr11:130130750-130131824	130130750	130131824	6	0	0	6	2	1	2	3	3	2	1	3	3	1	4	6	0	7	5	2	4	5	1	5	4	2	1	5	4	0	0	1	11	2	5	2	1	0	5	0
chr11:130773149-130776616	130773149	130776616	0	0	0	0	0	0	0	0	0	0	0	0	0	0	0	0	0	0	0	0	0	0	0	0	2	0	0	0	0	0	0	0	0	0	0	0	0	0	0	0
chr11:13378601-13391314	13378601	13391314	0	0	0	0	0	0	0	0	0	0	0	0	0	0	0	0	0	0	0	0	0	0	0	0	0	0	0	0	0	0	0	0	0	3	0	0	0	0	0	0
chr11:134054531-134055421	134054531	134055421	0	0	0	0	0	0	0	0	0	0	0	0	0	0	0	0	0	0	0	0	0	0	0	0	0	0	0	0	2	0	0	0	0	0	0	0	0	0	0	0
chr11:134076493-134080348	134076493	134080348	0	0	0	0	0	0	0	0	0	0	0	0	0	0	0	0	0	0	0	0	1	0	0	0	0	0	0	1	1	0	0	0	0	0	2	0	0	0	0	0
chr11:13435076-13443385	13435076	13443385	0	0	0	1	2	1	0	2	0	0	0	0	1	1	2	0	0	1	0	1	0	0	0	0	0	0	1	0	3	0	0	0	0	0	0	1	0	0	1	0
chr11:14479329-14480233	14479329	14480233	0	0	0	0	0	0	0	0	0	0	0	0	0	0	0	0	0	0	0	1	1	0	0	0	0	0	0	0	0	0	0	0	0	7	0	0	0	0	0	0
chr11:14480077-14520531	14480077	14520531	0	0	0	0	0	0	0	0	0	0	0	0	0	0	0	0	0	0	0	0	0	0	0	0	0	0	0	0	0	0	0	0	0	0	0	2	0	0	0	0
chr11:14486456-14491109	14486456	14491109	0	0	0	0	0	0	0	0	0	0	0	0	0	0	0	0	0	0	0	0	0	0	0	0	0	0	0	0	0	0	0	4	0	0	0	0	0	0	0	0
chr11:14490881-14498561	14490881	14498561	0	0	0	0	0	0	0	0	0	0	0	0	1	0	0	0	0	0	0	0	0	0	0	0	0	0	0	0	0	0	0	0	0	0	0	0	0	0	2	0
chr11:14501114-14502643	14501114	14502643	0	0	0	0	0	0	0	0	0	0	0	0	0	0	0	0	0	0	0	0	0	0	0	0	0	0	0	0	0	3	0	0	0	0	0	0	0	0	0	0
chr11:14501114-14520531	14501114	14520531	0	0	0	0	0	0	0	0	0	0	0	0	0	0	0	0	0	0	0	0	0	0	0	0	0	0	0	0	0	0	0	0	0	0	0	2	0	0	0	0
chr11:14793482-14810788	14793482	14810788	0	0	0	0	0	0	0	1	0	1	0	0	3	0	1	0	0	1	1	1	0	0	0	0	1	3	0	0	4	0	0	0	0	0	4	0	0	0	0	0
chr11:14793482-14840755	14793482	14840755	0	0	0	0	0	0	0	0	0	0	0	0	0	0	0	0	0	0	0	0	0	0	0	0	0	0	0	0	0	0	0	0	0	0	3	0	0	0	0	0
chr11:14852243-14882912	14852243	14882912	0	0	0	0	0	0	0	0	0	0	0	0	0	0	0	0	0	0	0	0	0	0	0	0	0	0	0	0	0	0	0	0	4	0	0	0	0	0	0	0
chr11:1501622-1502115	3003244	3004230	0	0	0	0	0	0	0	0	0	0	0	0	0	0	0	0	0	0	0	1	0	0	1	0	0	0	2	0	0	0	0	0	0	0	0	0	0	0	0	0
chr11:16007749-16119234	16007749	16119234	0	0	0	0	0	0	0	0	0	0	0	0	1	0	0	0	0	0	0	0	0	0	0	1	1	0	0	0	0	6	0	0	0	0	0	0	0	0	0	0
chr11:16036487-16077447	16036487	16077447	0	0	0	0	0	0	0	0	0	0	0	0	0	0	0	0	0	0	0	0	1	0	0	0	2	0	0	0	0	0	0	0	0	0	4	1	0	0	0	0
chr11:16036487-16119234	16036487	16119234	0	0	0	0	0	0	0	0	1	0	0	0	0	1	0	0	1	0	1	0	0	1	0	1	2	1	1	2	0	5	1	0	0	0	2	6	0	0	0	0
chr11:16068059-16077447	16068059	16077447	0	0	0	0	0	0	0	0	0	1	0	0	0	3	0	0	0	0	1	0	0	0	0	1	1	0	1	4	2	4	0	0	3	1	9	11	2	0	0	0
chr11:16068059-16119234	16068059	16119234	0	0	0	0	0	0	0	0	0	0	0	0	1	0	0	0	1	1	0	0	0	1	0	1	0	3	1	2	3	1	0	8	0	3	7	15	5	0	0	0
chr11:16068059-16133469	16068059	16133469	0	0	0	0	0	0	0	0	0	0	0	0	0	0	0	0	0	0	0	0	0	0	1	0	0	0	0	0	0	0	0	0	0	0	3	0	0	0	1	0
chr11:16068059-16208501	16068059	16208501	0	0	0	0	0	0	0	0	1	0	0	0	0	0	0	0	0	0	0	0	1	0	2	0	0	0	0	0	0	0	0	0	0	0	1	1	0	0	0	0
chr11:16068059-16256217	16068059	16256217	0	0	0	0	0	0	0	0	0	0	0	0	0	0	0	0	0	0	0	0	0	0	0	2	0	0	0	0	0	0	0	0	0	0	0	0	0	0	0	0
chr11:16117541-16119234	16117541	16119234	0	0	0	0	0	0	0	0	0	0	0	0	0	0	0	0	0	0	0	0	3	2	0	0	1	0	0	0	1	0	0	0	0	0	0	2	0	0	0	0
chr11:16117541-16133469	16117541	16133469	0	0	0	0	0	0	0	0	0	0	0	1	0	0	0	0	0	1	1	1	2	0	0	2	5	1	0	1	0	0	0	0	0	1	0	2	2	0	0	0
chr11:16117541-16208501	16117541	16208501	0	0	0	0	0	0	0	0	0	0	0	0	1	0	0	0	2	0	0	0	2	1	2	2	3	1	1	4	0	7	0	0	5	17	11	13	8	4	19	0
chr11:16117541-16256217	16117541	16256217	0	0	0	0	0	0	0	0	0	0	0	0	0	0	0	0	0	0	0	0	0	0	0	0	1	0	0	2	0	0	0	0	0	0	0	0	4	0	0	0
chr11:16117541-16340199	16117541	16340199	0	0	0	0	0	0	0	0	0	0	0	0	0	0	0	0	0	0	0	0	0	0	0	0	0	0	0	0	0	0	0	0	0	0	5	0	0	0	0	0
chr11:16119154-16208501	16119154	16208501	0	0	0	0	0	0	0	0	0	0	0	0	0	0	0	0	0	0	0	0	0	0	0	1	0	0	0	0	0	0	0	0	0	0	0	2	0	0	1	0
chr11:16119154-16362798	16119154	16362798	0	0	0	0	0	0	0	0	0	0	0	0	0	0	0	0	0	0	0	0	0	0	0	0	1	0	0	2	0	0	0	0	0	0	0	0	0	0	0	0
chr11:16133348-16208501	16133348	16208501	0	0	0	0	0	0	0	0	0	0	0	0	0	0	0	0	0	0	0	0	0	0	0	1	1	0	0	0	0	1	0	2	0	5	6	12	3	0	5	0
chr11:16133348-16256217	16133348	16256217	0	0	0	0	0	0	0	0	0	0	0	0	0	0	0	0	0	0	0	0	0	0	0	0	0	1	0	0	0	4	0	0	0	0	0	2	0	1	4	0
chr11:16205431-16208501	16205431	16208501	0	1	0	0	0	0	0	0	1	0	0	1	0	0	2	0	1	1	3	0	2	4	0	3	0	2	0	2	1	0	0	0	2	0	6	8	0	5	0	0
chr11:16205431-16256217	16205431	16256217	0	0	0	0	0	0	0	0	0	0	0	0	0	0	1	0	0	0	0	0	0	0	1	0	0	2	0	0	1	3	0	0	0	1	6	4	5	0	1	0
chr11:16205431-16362798	16205431	16362798	0	0	0	0	0	0	0	0	0	0	0	0	0	0	1	0	0	0	0	0	0	1	0	0	0	0	0	1	0	0	0	0	0	3	0	2	6	0	0	0
chr11:16256127-16340199	16256127	16340199	0	0	0	0	0	0	0	0	0	0	0	0	0	0	0	0	0	0	0	0	0	0	0	0	0	0	0	0	0	0	6	0	0	0	0	0	0	0	0	0
chr11:16305301-16340199	16305301	16340199	0	0	0	0	0	0	0	0	0	0	0	0	0	0	0	0	0	0	0	0	0	0	0	0	0	0	0	0	0	0	4	0	0	0	0	0	0	0	0	0
chr11:16305301-16497935	16305301	16497935	0	0	0	0	0	0	0	0	0	0	0	0	0	0	0	0	0	0	0	0	0	0	0	0	0	0	0	0	0	2	0	0	0	4	0	0	0	0	0	0
chr11:16339991-16340199	16339991	16340199	0	0	0	0	0	0	0	0	0	0	0	0	0	0	0	0	0	0	0	0	0	0	0	0	0	2	1	0	0	0	0	0	0	0	0	0	0	0	0	0
chr11:16339991-16362798	32679982	32725596	0	0	0	0	0	0	0	0	0	0	0	0	0	0	0	1	0	0	1	0	0	1	0	0	2	2	1	0	0	9	0	1	7	9	13	5	0	0	15	0
chr11:16339991-16497935	16339991	16497935	0	0	0	0	0	0	0	0	0	0	0	0	0	0	0	0	0	0	0	0	0	0	1	0	0	0	0	0	0	0	0	0	0	1	4	1	0	0	0	0
chr11:16362557-16362798	32725114	32725596	0	0	0	0	0	0	0	0	0	0	0	0	0	0	0	0	0	0	0	0	0	0	0	2	0	0	4	0	0	0	0	0	0	8	1	0	0	0	4	0
chr11:16766147-16774441	16766147	16774441	0	0	0	0	0	0	0	0	0	0	0	0	0	0	0	0	0	0	0	0	0	0	0	0	0	0	0	0	0	0	0	0	0	0	0	0	0	0	5	0
chr11:17112880-17115932	17112880	17115932	0	0	0	0	0	0	0	0	0	0	0	0	0	0	0	0	0	0	1	0	0	0	0	0	0	0	0	0	0	0	0	7	0	0	0	0	0	0	8	0
chr11:17118603-17121516	17118603	17121516	0	0	0	0	0	0	0	0	0	0	0	0	0	0	0	0	0	0	0	0	0	0	0	0	0	2	0	0	0	0	0	0	0	0	0	0	0	0	0	0
chr11:17122824-17134213	17122824	17134213	0	0	0	0	0	0	0	0	0	0	0	0	0	0	2	0	0	0	0	0	0	0	0	0	0	0	0	0	0	0	0	0	0	0	0	0	0	0	0	0
chr11:17126715-17136012	17126715	17136012	0	0	0	0	0	0	0	0	0	0	0	0	0	0	0	0	0	0	0	0	0	0	0	0	0	0	0	0	0	0	0	0	2	0	0	0	0	0	0	0
chr11:17153462-17167489	17153462	17167489	0	1	0	0	0	0	0	0	2	0	0	0	0	1	0	2	0	0	0	0	0	0	0	0	0	0	0	0	0	0	0	0	9	9	5	2	3	0	0	0
chr11:17156365-17191353	17156365	17191353	0	0	0	0	0	0	0	0	0	0	0	0	0	0	0	0	0	0	0	0	0	0	0	0	0	0	0	0	0	0	0	0	0	0	2	0	0	0	0	0
chr11:17167214-17172202	17167214	17172202	0	0	0	0	0	0	0	0	0	0	0	0	0	0	0	0	0	0	0	0	0	0	0	0	0	0	0	0	0	0	0	0	0	0	0	0	3	0	0	0
chr11:17190223-17191353	17190223	17191353	0	0	0	0	0	0	0	0	0	0	0	0	1	0	0	0	0	1	0	0	0	0	0	0	0	0	0	0	0	0	14	0	0	5	0	1	0	0	0	0
chr11:17304335-17333667	17304335	17333667	0	0	0	0	0	0	0	0	0	0	0	0	0	0	0	0	0	0	0	0	0	0	0	0	0	0	0	0	0	0	0	0	0	0	2	0	0	0	0	0
chr11:17316870-17323417	17316870	17323417	0	0	0	0	0	0	0	0	0	0	0	1	0	0	0	0	0	0	0	0	0	0	0	0	0	0	0	0	0	2	0	0	0	0	0	0	0	0	0	0
chr11:17316870-17333667	17316870	17333667	0	0	0	0	0	0	0	0	0	1	0	0	0	0	0	1	1	0	0	0	1	0	1	1	0	0	2	1	0	0	0	0	0	0	15	0	0	0	0	0
chr11:17316870-17337022	17316870	17337022	0	0	0	0	1	0	0	0	0	0	0	0	0	0	0	0	0	0	0	0	0	0	0	0	1	0	0	0	0	0	0	0	0	0	0	4	0	0	0	0
chr11:17316870-17351844	17316870	17351844	0	0	0	0	0	0	1	0	0	0	0	0	0	0	2	0	0	0	0	0	1	0	0	0	0	1	0	0	0	0	0	0	0	4	0	0	0	0	0	0
chr11:17317650-17352530	17317650	17352530	0	0	0	0	0	0	0	0	0	0	0	0	0	0	0	0	0	0	0	0	0	0	0	0	0	0	0	0	0	0	0	0	0	0	4	0	0	0	0	0
chr11:17331118-17333477	17331118	17333477	0	0	0	0	0	0	0	0	0	0	0	0	0	0	0	0	0	0	0	0	0	0	0	0	0	0	0	0	0	0	0	0	0	2	0	0	0	0	0	0
chr11:17331118-17337022	17331118	17337022	0	0	0	0	0	0	0	0	0	0	0	0	0	0	0	0	0	0	0	0	0	0	0	0	0	0	0	1	0	0	0	0	3	0	0	0	0	0	0	0
chr11:17332371-17333667	17332371	17333667	0	0	1	0	0	0	0	0	0	0	0	0	0	0	0	0	0	0	0	0	0	0	0	0	0	0	0	0	0	0	0	0	0	4	0	0	0	0	0	0
chr11:18010143-18029623	18010143	18029623	0	0	0	2	0	0	0	0	0	0	0	0	0	0	0	0	0	0	0	0	0	0	0	0	0	0	0	0	0	0	0	0	0	0	0	0	0	0	0	0
chr11:18312988-18313566	18312988	18313566	0	0	0	0	1	0	2	0	1	0	0	0	0	0	0	0	0	0	0	1	0	0	0	1	1	1	0	0	0	0	0	0	0	0	0	0	0	0	0	0
chr11:18312988-18314523	18312988	18314523	3	2	0	2	0	0	1	0	1	1	0	0	1	4	1	0	0	2	2	0	0	2	0	0	0	0	0	2	0	0	0	0	0	0	2	6	3	0	2	0
chr11:18354606-18380187	18354606	18380187	0	0	0	0	0	0	0	0	0	0	0	0	0	0	0	0	0	0	0	0	0	0	0	0	0	0	0	0	0	2	0	0	0	0	0	0	0	0	0	0
chr11:18361110-18382254	18361110	18382254	0	0	0	0	0	0	0	0	0	0	0	0	0	0	0	0	0	0	0	0	0	0	0	0	0	0	0	0	0	0	0	0	0	0	0	0	4	0	0	0
chr11:18362807-18363154	18362807	18363154	0	0	0	0	0	0	0	0	0	0	0	0	0	0	0	0	0	0	0	0	0	0	0	0	0	0	0	0	0	0	0	0	0	3	0	0	0	0	0	0
chr11:18369134-18382254	18369134	18382254	0	0	0	0	0	0	0	0	0	0	0	0	0	2	0	0	0	0	0	0	0	0	0	0	1	0	0	0	0	0	0	0	0	0	0	0	0	0	0	0
chr11:18373427-18382254	18373427	18382254	0	0	0	0	0	0	0	0	0	0	0	0	0	0	0	0	0	0	0	0	0	0	0	0	0	1	0	0	0	0	0	0	0	0	0	1	0	0	9	0
chr11:18505416-18524124	18505416	18524124	0	0	0	0	0	0	0	0	0	0	0	0	0	0	0	0	0	0	0	0	0	0	0	0	0	0	0	0	0	0	0	0	2	0	0	0	0	0	0	0
chr11:18536224-18541150	18536224	18541150	0	1	0	0	0	0	0	0	0	0	0	0	0	0	0	0	0	0	0	0	0	0	0	0	0	2	0	0	0	0	0	0	2	0	0	0	0	0	0	0
chr11:20411289-20429578	20411289	20429578	0	0	0	0	0	0	0	0	0	0	0	0	0	0	0	0	0	0	0	0	0	0	0	0	0	0	0	0	0	0	0	0	0	0	6	0	0	0	0	0
chr11:20414442-20483713	20414442	20483713	0	0	0	0	0	0	0	0	0	0	0	0	0	0	0	0	0	0	0	0	0	0	0	0	0	0	0	0	0	0	0	0	7	0	0	0	0	0	0	0
chr11:20417348-20419267	20417348	20419267	0	0	0	0	0	0	0	0	0	0	0	0	0	0	0	0	0	0	0	0	0	0	0	0	0	0	0	0	0	0	0	0	4	0	0	0	2	0	0	0
chr11:20417348-20483713	20417348	20483713	0	0	0	0	0	0	0	0	0	0	0	0	0	0	0	0	0	0	0	0	0	0	0	0	0	0	0	0	0	0	0	0	3	0	0	0	0	0	0	0
chr11:20417348-20515800	20417348	20515800	0	0	0	0	0	0	0	0	0	0	0	0	0	0	0	0	0	0	0	0	0	0	0	0	0	0	0	0	0	0	0	0	3	0	0	0	0	0	0	0
chr11:20424464-20473754	20424464	20473754	1	0	0	0	0	0	0	0	0	0	0	0	0	0	0	0	0	0	0	0	0	0	0	0	0	0	0	0	0	0	0	0	0	4	0	0	0	0	0	0
chr11:20448311-20486092	20448311	20486092	0	0	0	0	0	0	0	0	0	0	0	0	0	0	0	0	0	0	0	0	0	0	0	0	0	2	0	0	0	0	0	0	0	0	0	0	0	0	0	0
chr11:20483525-20515800	20483525	20515800	0	0	0	0	0	0	0	0	0	0	0	0	0	0	0	0	0	0	0	0	0	0	0	0	0	0	0	0	0	0	0	0	0	2	1	0	0	4	0	0
chr11:22225349-22249132	22225349	22249132	0	0	0	0	0	0	0	1	0	0	0	0	0	0	0	0	0	0	0	0	0	0	0	0	0	0	0	0	0	0	0	0	0	0	3	1	0	0	0	0
chr11:22225349-22261230	22225349	22261230	0	0	0	0	0	0	0	0	0	0	0	0	0	0	0	0	0	0	0	0	0	0	0	0	0	0	0	0	0	0	0	0	0	0	4	0	0	0	0	0
chr11:22242642-22261230	22242642	22261230	0	0	0	0	0	0	0	0	0	0	0	0	0	0	0	0	0	0	0	0	0	0	0	0	0	0	0	0	0	0	0	0	0	0	4	0	0	0	0	0
chr11:224077-233215	224077	233215	0	0	0	0	0	0	0	0	0	0	0	2	0	0	0	0	0	0	0	0	0	0	0	1	0	0	0	0	0	0	0	0	0	0	0	0	0	0	0	0
chr11:27359644-27363097	27359644	27363097	0	0	0	0	0	0	0	0	0	0	0	0	0	0	0	0	0	0	0	0	0	0	0	0	0	0	0	0	0	0	1	0	1	1	6	0	0	0	0	0
chr11:27360427-27363097	27360427	27363097	0	0	0	0	0	0	0	0	0	0	0	0	0	0	0	0	0	0	0	0	0	0	0	0	0	0	0	0	0	4	0	0	0	0	0	0	0	0	0	0
chr11:27405882-27434407	27405882	27434407	0	0	0	0	0	0	0	0	0	0	0	0	0	0	0	0	0	0	0	0	0	0	0	0	0	0	2	0	0	0	0	0	0	0	0	0	0	0	0	0
chr11:28056933-28058211	28056933	28058211	0	0	0	0	1	0	0	0	0	0	0	0	0	0	0	0	0	0	0	1	0	0	0	0	0	1	1	0	0	0	0	0	0	2	0	2	0	5	0	0
chr11:28080472-28090970	28080472	28090970	0	0	0	0	0	0	0	0	0	0	0	0	0	0	0	0	0	0	0	0	0	0	0	0	0	0	0	0	0	1	0	0	0	5	2	0	0	0	0	0
chr11:28080472-28113060	28080472	28113060	0	0	0	0	0	1	0	0	0	0	0	0	0	0	0	0	0	3	0	0	0	0	0	0	1	0	0	0	0	0	0	3	0	0	0	0	0	0	0	0
chr11:28090805-28106355	28090805	28106355	0	0	0	0	0	0	0	0	0	0	0	0	0	0	0	0	0	0	0	0	0	0	0	0	0	0	0	0	0	0	0	4	0	0	0	0	0	0	0	0
chr11:28098553-28113060	28098553	28113060	0	0	0	0	0	0	0	0	0	0	0	0	0	0	0	0	1	1	1	0	0	1	0	0	0	0	0	0	0	0	0	0	3	4	0	0	0	0	0	0
chr11:28232608-28318478	28232608	28318478	0	0	0	0	0	0	0	0	0	0	0	0	0	0	0	0	0	0	0	0	0	0	0	0	0	0	0	0	0	0	0	0	0	0	4	0	0	0	0	0
chr11:2970456-2972545	2970456	2972545	0	0	0	0	0	0	0	0	0	0	0	0	0	0	0	0	0	0	0	0	0	0	0	0	2	0	0	0	0	0	0	0	0	0	0	0	0	0	0	0
chr11:2970456-2981139	2970456	2981139	0	0	0	0	0	0	0	0	0	0	0	0	0	0	0	0	0	0	0	0	0	0	0	0	0	0	0	0	0	0	0	0	0	0	0	0	3	0	0	0
chr11:2972488-2979774	2972488	2979774	0	0	0	0	0	0	0	0	0	0	0	0	0	0	0	0	0	0	0	0	0	0	0	0	2	0	0	0	0	0	0	0	0	0	0	0	0	0	0	0
chr11:2972488-2981139	2972488	2981139	0	0	0	0	0	0	0	0	0	0	0	0	0	0	0	0	0	0	0	0	0	2	0	0	0	0	0	0	0	0	0	0	0	0	0	0	0	0	0	0
chr11:2972488-2993473	2972488	2993473	0	0	0	0	0	0	0	0	0	0	0	0	0	0	0	0	0	0	0	0	0	0	0	0	0	0	0	0	0	0	0	0	0	0	2	0	0	0	0	0
chr11:2972488-2997353	2972488	2997353	0	0	0	0	0	0	0	0	0	0	0	0	0	0	0	0	0	0	0	0	0	0	0	0	0	0	0	0	0	4	0	0	2	0	0	2	0	0	0	0
chr11:2972488-2999572	2972488	2999572	0	0	0	0	0	0	0	0	0	0	0	0	0	0	0	0	0	0	0	0	0	0	0	0	0	0	0	1	0	0	0	0	0	3	4	0	0	7	0	0
chr11:2972488-3000467	5944976	6000934	4	3	5	2	2	2	0	2	0	1	1	3	2	3	1	1	1	2	0	1	1	2	2	2	3	5	7	4	8	18	0	7	0	17	18	9	3	0	19	16
chr11:2972488-3010501	2972488	3010501	0	0	0	0	0	0	0	0	0	0	0	0	0	0	0	0	0	0	0	0	0	0	0	0	0	0	0	0	0	2	0	0	0	0	18	1	0	0	0	0
chr11:2973009-3010501	2973009	3010501	0	0	0	0	0	0	0	0	0	0	0	0	0	0	0	0	0	0	0	0	0	0	0	0	0	0	0	0	0	2	0	0	0	0	0	0	0	0	0	0
chr11:2976973-2981139	2976973	2981139	0	0	0	0	0	0	0	0	0	0	0	0	0	0	0	0	0	0	0	0	0	0	0	0	0	0	0	0	0	0	0	0	0	6	0	0	0	0	0	1
chr11:2976973-2992764	2976973	2992764	0	0	0	0	0	0	0	0	0	0	0	0	0	0	0	0	0	0	0	0	0	0	0	0	0	0	0	0	1	0	0	0	0	0	0	3	0	0	0	0
chr11:2976973-2993473	2976973	2993473	0	0	0	0	0	0	0	0	0	0	0	0	0	1	0	0	0	2	0	0	0	0	0	0	0	0	0	0	0	0	0	0	0	0	0	1	0	0	0	0
chr11:2976973-2999572	2976973	2999572	0	0	0	0	0	0	0	0	0	0	0	0	0	0	0	0	0	0	0	0	0	0	0	0	0	0	0	0	0	0	0	0	0	2	0	0	0	0	0	0
chr11:2976973-3000467	2976973	3000467	0	0	0	0	0	0	0	0	0	0	0	0	0	0	0	0	0	0	0	0	0	0	1	0	1	0	2	1	0	4	0	0	0	5	9	1	0	0	0	0
chr11:2979628-2981139	2979628	2981139	0	0	0	0	0	0	0	0	0	0	0	0	0	0	0	0	0	0	0	0	0	0	0	0	0	0	0	0	0	0	0	0	0	2	0	0	0	0	0	0
chr11:2979628-2997353	2979628	2997353	0	0	0	0	0	0	0	0	0	0	0	0	0	0	0	0	0	0	0	0	0	0	0	0	0	0	0	0	0	0	0	0	0	4	0	0	0	0	0	0
chr11:2980999-3000467	2980999	3000467	0	0	0	0	0	0	0	0	0	0	0	0	0	0	0	0	0	1	0	0	0	0	0	0	0	0	0	0	0	3	0	0	0	2	0	0	0	0	0	0
chr11:2985909-2993509	2985909	2993509	0	0	0	0	0	0	0	0	0	0	0	0	0	0	0	0	0	0	0	0	0	0	0	0	0	0	0	0	0	0	0	0	0	5	2	2	0	0	0	0
chr11:2985909-2999572	2985909	2999572	0	0	0	0	0	0	0	0	0	0	0	0	0	0	0	0	0	0	0	0	0	0	0	0	0	0	0	0	0	2	0	7	0	0	0	0	0	0	0	0
chr11:2985909-3000467	2985909	3000467	0	0	0	0	0	0	0	0	0	0	0	1	0	0	0	0	0	0	0	0	0	0	0	0	0	0	0	1	0	1	0	0	0	7	0	0	2	0	0	0
chr11:2991032-2992764	2991032	2992764	0	0	0	0	0	0	0	0	0	0	0	0	0	0	0	0	0	0	0	0	0	0	0	0	0	0	0	0	0	0	0	0	0	0	2	0	0	0	0	0
chr11:2991032-2993473	2991032	2993473	0	0	0	0	0	0	0	0	0	0	0	0	0	0	0	0	0	0	0	0	0	0	1	0	4	1	1	1	2	0	0	0	0	0	0	0	0	0	0	0
chr11:2991032-2993509	2991032	2993509	0	0	0	0	0	0	0	0	0	0	0	0	0	0	0	0	0	0	0	0	0	0	0	0	0	1	0	0	0	6	0	0	4	1	3	1	0	0	0	0
chr11:2991032-2999572	2991032	2999572	0	0	0	0	0	0	0	0	0	0	0	0	0	0	0	0	0	0	0	0	0	0	0	0	0	0	0	0	0	5	0	0	3	0	1	1	0	0	0	0
chr11:2991032-3000467	2991032	3000467	0	2	2	0	0	0	0	0	1	0	0	0	0	0	0	0	0	0	0	0	0	2	1	0	0	2	1	1	0	5	0	2	3	12	11	5	0	0	0	0
chr11:2992677-2993509	2992677	2993509	0	0	0	0	0	0	0	0	0	0	0	0	0	0	0	0	0	0	0	0	0	0	0	0	0	0	0	0	0	0	0	0	0	0	0	2	0	0	0	0
chr11:2992677-3000467	2992677	3000467	0	1	0	0	0	0	0	0	0	0	0	0	0	0	0	0	0	1	0	0	0	0	0	0	0	0	0	0	0	0	0	0	0	0	0	0	3	0	0	0
chr11:2997253-3000467	2997253	3000467	0	0	0	1	0	0	0	0	0	0	0	2	0	0	0	2	0	0	0	0	0	0	0	0	0	0	0	1	0	0	0	0	3	0	0	0	0	0	0	0
chr11:3023191-3041562	3023191	3041562	0	0	0	0	0	0	0	0	0	0	0	0	0	0	0	0	0	0	0	2	0	0	0	0	0	0	0	0	0	0	0	0	0	0	0	0	0	0	0	0
chr11:3026595-3041562	3026595	3041562	0	0	0	0	0	0	0	0	0	0	0	0	0	0	0	0	0	0	0	0	0	0	0	0	0	0	0	0	2	0	0	0	0	0	0	0	0	0	1	0
chr11:3038335-3040497	3038335	3040497	0	0	0	0	0	0	0	0	0	0	0	0	0	0	0	0	0	0	0	0	0	0	0	0	0	1	0	0	0	0	0	0	0	0	3	1	0	0	0	0
chr11:3059279-3060522	3059279	3060522	0	0	0	0	0	0	0	0	0	0	0	0	0	0	0	0	0	0	0	0	0	0	0	0	0	0	0	0	0	0	0	0	0	5	0	0	0	0	0	0
chr11:32610139-32610681	32610139	32610681	0	0	0	0	0	0	0	0	0	0	0	0	0	0	0	0	0	0	0	0	0	0	0	0	0	0	0	0	0	0	0	0	0	2	0	0	0	0	0	0
chr11:32657241-32781804	32657241	32781804	0	0	0	0	0	0	0	0	0	0	0	0	0	0	0	0	0	0	0	0	0	0	0	0	0	2	0	0	0	0	0	0	0	0	0	0	0	0	0	0
chr11:32852053-32858367	32852053	32858367	0	0	0	0	0	0	0	0	0	0	0	0	0	0	0	0	0	0	0	0	0	0	0	0	0	0	0	0	0	0	0	0	0	0	0	2	0	0	0	0
chr11:32948702-32956981	32948702	32956981	1	3	2	4	0	0	2	2	0	1	2	0	0	0	0	2	1	1	3	0	0	1	0	0	0	0	0	0	4	0	3	0	0	0	0	0	0	0	0	0
chr11:32948702-32995095	32948702	32995095	0	0	0	2	0	0	0	0	0	0	0	0	0	0	0	0	0	0	0	0	0	0	0	0	0	0	0	0	0	0	0	0	0	0	0	0	0	0	0	0
chr11:32976841-32979632	32976841	32979632	0	0	0	0	0	0	0	0	0	0	0	0	0	0	0	0	0	0	0	0	0	0	0	0	0	0	0	0	0	0	0	0	0	5	0	0	0	0	0	0
chr11:33127112-33127610	33127112	33127610	0	2	0	0	0	0	0	0	0	0	0	0	0	0	0	0	0	1	0	0	0	0	0	0	0	0	0	0	0	0	0	0	0	0	0	0	0	0	0	0
chr11:33307958-33309057	66615916	66618114	12	7	5	9	3	4	6	6	3	8	6	2	3	4	9	9	1	8	6	5	5	4	3	9	4	6	0	5	17	13	0	22	33	13	30	17	25	0	10	1
chr11:33307958-33350179	33307958	33350179	0	0	0	0	0	0	0	0	0	0	0	0	0	0	0	0	0	0	0	0	0	0	0	1	0	0	0	2	0	0	0	0	4	0	0	0	0	0	0	0
chr11:33358620-33363232	33358620	33363232	0	0	0	0	0	0	0	0	0	0	0	0	0	0	1	0	0	0	1	0	0	1	0	0	0	0	0	0	0	0	0	0	3	0	1	0	0	0	0	0
chr11:33768675-33792376	33768675	33792376	0	0	0	0	0	0	0	0	0	0	0	0	0	0	0	0	0	0	0	0	0	0	0	0	0	2	0	0	0	0	0	0	0	0	0	0	0	0	0	0
chr11:34084598-34084910	34084598	34084910	0	0	0	0	0	0	0	0	0	0	0	0	0	0	0	0	0	0	0	0	0	0	0	0	0	0	0	0	0	0	0	0	0	0	3	0	0	0	0	0
chr11:34093272-34098189	68186544	68196378	0	1	1	0	2	1	0	1	1	0	0	1	0	1	0	1	0	2	0	0	1	0	0	1	4	4	0	4	7	0	20	5	5	10	7	7	5	0	2	0
chr11:34093272-34101312	34093272	34101312	0	0	0	0	0	0	0	0	0	0	0	0	0	0	0	0	0	0	0	0	0	0	0	0	0	0	0	0	0	0	0	0	1	2	0	0	0	0	0	0
chr11:34093272-34104588	34093272	34104588	0	0	0	0	0	0	0	0	0	0	0	0	0	0	0	0	0	0	0	0	0	0	0	0	0	0	1	0	0	0	0	0	0	0	0	0	0	0	4	0
chr11:34093272-34107960	34093272	34107960	0	0	0	0	0	0	0	0	0	0	0	0	0	0	0	0	0	0	0	0	0	0	0	1	0	0	0	0	0	0	0	0	4	0	0	0	0	0	0	0
chr11:34093272-34112225	34093272	34112225	0	0	0	0	0	0	0	0	0	0	0	0	0	0	0	0	0	0	0	0	0	0	0	0	2	0	0	0	0	0	0	0	0	0	0	0	0	0	0	0
chr11:34097782-34107960	34097782	34107960	0	0	0	0	0	0	0	0	0	0	0	0	0	0	0	0	0	0	0	0	0	0	0	0	4	0	0	0	0	0	0	0	0	0	0	0	0	0	0	0
chr11:34097782-34118220	34097782	34118220	0	0	0	0	0	0	0	0	0	0	0	0	0	0	0	0	0	0	0	0	0	0	0	0	0	0	0	0	0	0	0	0	0	0	2	2	0	0	0	0
chr11:34097782-34119308	34097782	34119308	0	0	0	0	0	0	0	0	0	0	0	0	0	0	0	0	0	0	0	0	0	0	0	0	0	0	0	0	1	0	0	0	3	0	0	2	0	0	0	0
chr11:34101174-34111003	34101174	34111003	0	0	0	0	0	0	0	0	0	0	0	0	0	0	0	0	0	0	0	1	0	0	0	0	2	0	0	0	0	0	0	0	0	0	0	0	0	0	0	0
chr11:34101174-34113603	34101174	34113603	0	0	0	0	0	0	0	0	0	0	0	0	0	0	0	0	0	0	0	0	0	0	0	0	2	0	0	0	2	0	0	0	0	0	0	0	0	0	0	0
chr11:34104371-34111003	34104371	34111003	0	0	0	0	0	0	0	0	0	0	0	1	1	0	0	0	0	2	1	0	1	0	0	0	0	0	0	0	0	0	0	0	0	0	3	4	0	1	0	0
chr11:34107610-34107960	34107610	34107960	0	0	0	0	0	1	0	0	0	0	0	0	1	0	1	0	0	0	0	2	0	0	0	0	0	0	0	0	7	0	0	0	0	0	0	0	0	0	5	0
chr11:34107610-34113603	34107610	34113603	0	0	0	0	0	0	0	0	0	0	0	0	0	0	0	0	0	0	1	1	0	0	2	0	0	1	1	1	0	0	0	0	9	0	5	0	0	0	3	0
chr11:34110941-34112225	34110941	34112225	0	1	0	0	0	0	0	0	0	0	0	0	0	0	0	0	0	0	0	0	0	0	0	0	1	1	0	0	0	0	0	2	0	0	0	1	0	0	0	0
chr11:34110941-34113603	34110941	34113603	0	0	0	0	0	0	0	0	0	0	0	0	0	0	0	0	0	0	0	0	0	1	1	0	0	0	0	0	0	0	0	0	7	11	0	1	0	0	6	0
chr11:34111725-34112225	34111725	34112225	0	0	0	0	0	0	0	1	0	0	0	0	0	0	0	0	0	0	1	0	0	0	0	0	0	0	0	0	0	0	0	0	0	0	4	1	0	0	0	0
chr11:34111725-34113603	34111725	34113603	1	0	0	1	0	1	0	0	0	0	1	0	0	0	0	0	0	0	1	0	1	0	1	0	2	1	0	1	0	0	0	0	8	7	1	1	0	0	6	0
chr11:34129757-34144139	34129757	34144139	0	0	0	0	0	0	0	0	0	0	0	0	0	0	0	0	0	0	0	0	0	0	0	0	0	0	0	0	0	3	0	0	0	0	0	0	0	0	0	0
chr11:34139726-34144139	34139726	34144139	0	0	0	0	0	0	0	0	0	0	0	0	0	0	0	0	0	0	0	0	0	0	0	0	0	0	0	0	3	0	0	0	0	0	0	0	0	0	0	0
chr11:34144005-34149146	34144005	34149146	0	0	0	0	0	0	0	0	0	0	0	0	0	0	0	0	0	0	0	0	0	0	0	0	0	0	0	0	2	0	0	0	0	0	0	0	0	0	0	0
chr11:34218871-34226237	34218871	34226237	0	0	0	0	0	0	0	0	0	0	0	0	0	0	0	0	0	0	0	0	0	0	0	0	0	0	0	0	0	0	0	0	3	0	0	0	0	0	0	0
chr11:34474636-34478364	34474636	34478364	0	0	0	0	0	0	0	0	0	0	0	0	0	0	0	0	0	0	0	0	0	0	0	0	0	2	0	0	0	0	0	0	0	0	0	0	0	0	0	0
chr11:34477557-34478364	34477557	34478364	0	0	0	0	0	0	0	0	0	0	0	0	0	0	0	0	0	0	0	0	0	0	0	0	0	0	0	0	0	0	0	0	0	0	5	0	0	0	0	0
chr11:34904222-34910416	69808444	69820832	0	0	0	0	0	0	0	0	0	0	0	0	0	0	0	0	0	0	1	0	0	0	0	0	0	0	0	0	2	0	0	0	2	0	4	0	0	0	0	0
chr11:34952950-34991833	34952950	34991833	0	0	0	0	0	0	0	0	0	0	0	0	0	0	0	0	1	0	0	0	0	0	0	0	0	0	0	0	0	5	0	0	5	0	0	0	0	0	0	0
chr11:34952950-35006275	34952950	35006275	0	0	0	0	0	0	0	0	0	0	0	0	0	0	0	0	0	0	0	0	0	0	0	0	0	0	0	0	0	0	0	0	0	0	3	0	0	0	0	0
chr11:34969052-34991833	34969052	34991833	0	0	0	0	0	0	0	0	0	1	0	0	0	0	0	0	0	0	0	0	0	0	2	0	0	0	0	0	0	0	0	0	0	0	0	0	0	0	0	0
chr11:34978930-34991833	34978930	34991833	0	0	0	0	0	0	0	0	0	0	0	0	0	0	0	0	0	0	0	0	0	0	1	0	0	0	0	0	1	0	0	0	0	3	0	0	0	0	4	0
chr11:34978930-34999729	34978930	34999729	1	0	1	2	0	1	0	1	0	0	0	0	0	0	0	0	1	1	3	2	2	2	2	1	1	2	0	1	2	8	4	0	15	18	7	2	7	0	0	0
chr11:34978930-35006275	34978930	35006275	0	1	0	0	0	0	0	0	0	0	1	0	0	0	0	0	0	0	0	0	0	1	0	0	0	0	0	1	0	0	0	0	2	3	0	0	0	0	0	0
chr11:34978930-35013926	34978930	35013926	0	1	0	0	0	0	0	0	0	0	0	2	0	0	0	0	0	0	0	0	0	1	0	3	0	0	0	1	0	0	0	0	1	0	0	0	0	0	0	3
chr11:34991685-35006275	34991685	35006275	0	0	0	0	0	0	0	0	1	1	0	0	0	0	0	0	0	0	0	0	1	0	0	1	1	0	0	0	0	0	0	0	0	12	0	0	7	0	0	0
chr11:34991685-35013926	34991685	35013926	0	0	0	0	0	0	0	0	0	0	0	0	0	0	0	0	0	0	0	0	0	0	0	0	0	0	0	0	0	0	0	0	0	3	0	0	0	0	0	0
chr11:35198121-35208447	35198121	35208447	0	0	0	0	0	0	0	0	0	0	0	0	0	0	0	0	0	0	0	0	0	0	0	0	0	0	0	0	1	0	0	0	0	0	0	1	2	0	0	8
chr11:35198121-35211612	35198121	35211612	0	0	0	0	0	0	0	0	0	0	0	0	0	0	0	0	0	0	0	0	0	0	0	0	0	0	0	0	0	0	0	0	0	0	0	0	0	0	0	9
chr11:35218292-35231601	35218292	35231601	0	0	0	0	0	0	0	0	0	0	0	0	0	0	0	0	0	0	0	0	0	0	0	0	0	0	0	0	0	0	0	0	2	3	1	0	0	0	0	0
chr11:35218292-35232996	35218292	35232996	0	0	0	0	0	0	0	0	0	0	0	0	1	0	0	0	0	0	0	0	0	2	0	0	0	0	0	0	0	0	0	0	2	0	0	0	0	1	0	1
chr11:35219667-35231601	35219667	35231601	0	0	0	0	0	0	0	0	0	0	0	0	0	0	0	0	0	0	0	0	0	0	0	0	0	0	0	0	0	0	0	0	4	0	0	0	0	0	0	0
chr11:35226058-35232996	35226058	35232996	0	0	0	0	0	0	0	0	0	0	0	0	0	0	0	0	0	0	0	0	0	0	0	0	1	0	0	0	4	0	0	0	0	0	0	3	0	0	4	0
chr11:3712576-3716836	3712576	3716836	0	0	0	0	0	0	0	0	0	0	0	0	0	0	0	0	0	0	0	0	1	0	0	0	0	0	0	1	0	0	0	0	0	3	0	0	0	0	0	0
chr11:3712576-3784269	3712576	3784269	0	0	0	0	0	0	0	0	0	0	0	0	0	0	0	0	0	0	0	0	0	0	0	0	0	0	0	0	0	0	0	0	3	0	0	0	0	0	0	0
chr11:3723692-3727857	3723692	3727857	0	0	0	1	0	0	0	0	0	0	0	0	0	0	0	0	0	0	0	0	0	0	0	0	0	0	0	0	0	0	0	0	0	2	6	0	0	0	0	0
chr11:3735047-3742055	3735047	3742055	0	0	0	0	0	0	0	0	0	0	0	0	0	0	0	0	0	0	0	0	0	0	0	0	0	0	0	0	3	3	0	0	0	3	0	0	0	0	0	0
chr11:3735047-3752808	3735047	3752808	0	0	0	0	0	0	0	0	0	0	0	0	0	0	0	0	0	0	0	0	0	0	0	0	0	0	0	0	0	0	0	0	0	0	5	0	0	0	0	0
chr11:3735047-3765879	3735047	3765879	1	0	0	0	0	0	0	0	0	0	0	0	0	0	0	0	0	0	0	0	0	0	0	0	2	0	0	0	0	0	0	0	0	0	0	0	0	0	0	0
chr11:3740641-3765879	3740641	3765879	0	0	0	0	0	0	0	0	0	0	0	0	0	0	0	0	0	0	0	0	0	0	0	0	0	0	0	0	0	0	0	0	0	0	0	0	0	0	5	0
chr11:3746332-3752808	3746332	3752808	0	0	0	0	0	0	0	0	0	0	0	0	0	0	0	0	0	0	0	0	0	0	0	0	0	0	0	0	0	0	0	0	0	0	2	0	0	0	0	0
chr11:3752620-3752808	3752620	3752808	0	2	0	0	0	0	0	0	1	1	0	0	0	0	0	3	0	0	0	0	0	0	1	0	0	0	0	0	0	0	0	0	0	0	0	0	0	0	0	0
chr11:3752620-3756554	3752620	3756554	0	0	0	0	0	0	0	0	0	0	1	0	0	0	0	0	0	0	0	0	0	1	0	0	0	1	0	0	0	0	0	0	0	0	0	2	0	0	0	0
chr11:3752620-3765879	3752620	3765879	0	0	0	0	0	0	0	0	0	0	0	0	1	0	0	0	2	0	0	1	0	0	0	0	0	0	0	0	0	0	0	0	0	0	0	1	0	0	0	0
chr11:3752620-3774638	3752620	3774638	1	0	2	0	0	0	0	0	0	1	1	0	1	0	1	0	0	1	0	0	1	0	1	3	1	0	1	4	1	0	0	0	4	12	13	13	1	10	0	15
chr11:3774545-3803375	3774545	3803375	0	0	0	0	0	0	0	0	0	0	0	0	0	0	0	0	0	0	0	0	0	0	0	0	0	0	0	0	0	2	0	0	0	0	0	0	0	0	0	0
chr11:3784131-3797251	3784131	3797251	0	0	0	0	0	0	0	0	0	0	0	0	0	0	0	0	0	0	0	0	1	0	0	0	0	0	0	0	2	0	0	0	0	0	0	0	0	0	0	0
chr11:3789810-3793158	3789810	3793158	0	0	0	0	0	0	0	0	0	0	0	0	0	0	0	0	0	0	1	0	0	0	0	0	0	0	0	0	0	0	0	0	0	5	0	0	0	0	0	0
chr11:3789810-3794969	3789810	3794969	0	0	0	0	0	0	0	0	0	0	0	0	0	0	0	0	0	0	0	0	0	0	0	0	0	0	0	0	1	1	0	0	0	3	0	1	0	0	0	0
chr11:3789810-3797251	3789810	3797251	0	0	0	0	1	0	1	1	0	0	0	0	1	0	1	0	1	0	1	0	0	1	0	0	4	1	0	1	4	3	0	0	6	11	9	4	10	2	0	0
chr11:3792977-3797251	3792977	3797251	0	1	1	0	0	0	0	0	0	0	0	1	0	1	0	0	0	0	0	2	0	0	0	0	0	0	0	0	0	0	0	0	0	0	0	0	0	0	0	5
chr11:3794861-3797251	3794861	3797251	1	0	0	0	0	0	0	0	0	0	0	0	0	0	0	0	1	0	0	0	0	0	0	1	0	1	0	1	0	0	0	0	16	1	0	2	0	0	0	0
chr11:4076755-4080626	4076755	4080626	0	1	0	0	0	0	0	0	0	0	0	0	0	0	0	0	0	0	0	0	0	0	0	0	0	0	0	0	0	0	0	0	0	0	0	0	0	0	3	0
chr11:4123222-4127453	4123222	4127453	0	0	0	0	0	0	0	0	0	0	0	0	0	0	0	0	0	0	0	0	0	0	0	0	0	0	0	0	0	0	0	4	0	0	0	0	0	0	0	0
chr11:4123222-4128765	4123222	4128765	0	0	0	0	0	0	0	0	0	0	0	0	0	0	0	0	0	0	0	0	0	0	0	0	0	0	0	0	0	2	0	0	0	0	0	0	0	0	0	0
chr11:4123222-4133292	4123222	4133292	0	0	0	1	0	0	0	1	0	0	0	0	0	0	0	0	0	0	0	0	0	0	0	0	0	2	0	0	0	0	0	0	0	0	0	3	0	0	0	0
chr11:4127275-4130933	4127275	4130933	0	0	0	0	0	0	0	0	0	0	0	0	0	0	0	0	1	0	0	0	0	0	0	0	0	0	0	0	0	0	0	0	0	4	0	0	0	0	0	0
chr11:43348056-43357544	43348056	43357544	0	0	0	0	0	0	0	0	0	0	1	0	1	0	0	1	0	1	0	1	0	0	0	1	0	0	0	0	0	0	11	0	0	5	0	2	1	0	0	0
chr11:43349338-43357544	43349338	43357544	1	0	0	0	1	0	0	0	0	0	0	0	0	0	0	0	0	1	0	0	0	0	0	0	0	1	0	0	0	0	0	0	0	0	0	5	0	12	0	0
chr11:43400782-43411371	43400782	43411371	0	0	0	0	0	0	0	0	0	0	0	0	0	0	0	0	0	0	0	0	0	0	0	0	0	0	0	0	0	3	0	0	0	0	0	0	0	0	0	0
chr11:43421437-43429127	43421437	43429127	0	0	0	0	0	0	0	0	0	0	0	0	0	0	0	0	0	0	0	0	0	0	0	0	0	0	0	0	1	0	0	3	0	0	0	0	0	0	0	0
chr11:43425547-43429127	43425547	43429127	0	0	0	1	0	0	0	0	0	0	0	0	0	0	0	0	0	0	0	0	0	0	0	0	0	0	0	0	0	0	0	0	0	2	0	1	0	0	0	0
chr11:43427335-43436326	43427335	43436326	0	0	0	0	0	0	0	0	0	0	0	0	0	0	0	0	0	0	0	0	0	0	0	0	0	0	0	0	0	0	0	0	4	0	0	0	0	0	0	0
chr11:43428687-43472815	43428687	43472815	0	0	0	0	0	0	0	0	0	0	0	0	0	0	0	0	0	0	0	0	0	0	0	0	0	0	0	0	0	0	0	0	0	4	0	0	0	0	0	0
chr11:43464874-43472815	43464874	43472815	0	0	0	0	0	0	0	0	0	0	0	0	0	0	0	0	0	0	0	0	0	0	0	0	0	0	0	0	0	0	0	0	0	7	0	0	0	0	0	0
chr11:43852525-43861614	43852525	43861614	0	0	0	0	0	0	0	0	0	0	0	0	0	0	0	0	0	0	0	0	0	0	0	0	0	0	0	0	0	0	0	0	0	0	0	2	0	0	0	0
chr11:44129232-44228509	44129232	44228509	0	0	0	0	0	0	0	0	0	0	0	0	0	0	0	0	0	0	0	0	0	0	0	0	0	0	0	0	0	0	0	0	0	3	0	0	0	0	0	0
chr11:44193160-44228509	44193160	44228509	0	0	0	0	0	0	0	0	0	0	0	0	0	0	0	0	0	0	0	0	0	0	0	0	0	0	0	0	0	0	0	0	0	3	0	0	0	0	0	0
chr11:44253902-44257925	44253902	44257925	0	0	0	0	0	0	0	0	0	0	0	0	0	0	0	0	0	0	0	0	0	0	0	0	0	0	0	0	0	0	0	0	0	0	0	0	3	0	0	0
chr11:44254046-44254689	44254046	44254689	0	0	0	0	0	0	0	0	0	0	0	0	0	0	0	0	0	0	0	0	0	0	0	0	0	0	0	0	0	0	0	0	0	2	0	0	0	0	0	0
chr11:45883610-45893784	45883610	45893784	1	0	1	1	1	0	0	0	0	0	1	1	1	0	0	0	0	0	3	0	0	0	0	1	5	1	0	0	1	0	0	0	0	2	0	1	0	0	0	0
chr11:45957186-46140351	45957186	46140351	0	0	0	0	0	0	0	0	0	0	0	0	0	1	0	0	0	0	0	0	0	0	0	0	0	3	0	0	0	0	0	0	0	0	0	0	0	0	0	0
chr11:45958044-45959863	45958044	45959863	0	0	0	0	0	0	0	0	0	0	0	0	0	0	0	0	0	0	0	0	0	0	0	0	0	0	0	0	0	0	0	0	0	3	0	0	0	0	0	0
chr11:45970436-45975176	45970436	45975176	0	0	0	0	0	0	0	0	0	0	0	0	0	0	0	0	0	0	0	0	0	0	0	0	0	0	0	0	0	0	0	0	0	3	0	0	0	0	0	0
chr11:45970436-45991455	45970436	45991455	0	0	0	0	0	0	0	0	0	0	0	0	0	0	0	0	0	0	0	0	0	0	0	0	0	0	0	0	0	0	0	0	0	0	0	0	2	0	0	0
chr11:45975077-45987159	91950154	91974318	0	0	0	0	0	0	0	0	0	0	0	0	0	0	0	0	0	0	0	0	0	0	0	0	0	0	0	0	0	0	0	0	0	0	0	0	0	0	8	0
chr11:45986865-46001517	45986865	46001517	0	0	0	0	0	0	0	0	0	0	0	0	0	0	0	0	0	0	0	0	1	0	0	0	0	2	1	2	0	0	0	0	0	0	2	1	0	0	0	0
chr11:45986865-46105853	45986865	46105853	0	0	0	0	0	0	0	0	0	0	0	0	0	0	0	0	0	0	0	0	0	0	0	0	0	0	0	0	0	0	0	0	0	0	0	0	3	0	0	0
chr11:46001310-46001517	46001310	46001517	0	0	0	0	0	0	0	0	0	0	0	0	0	0	0	0	0	0	0	0	0	0	0	0	0	0	0	2	0	0	0	0	0	0	0	2	0	0	6	0
chr11:46070950-46105853	46070950	46105853	0	0	0	0	0	0	0	0	0	0	0	0	0	0	0	0	0	0	0	0	0	0	0	0	0	0	0	0	0	0	0	0	0	0	0	2	0	0	0	0
chr11:46098304-46113774	46098304	46113774	0	1	0	4	0	1	0	0	0	1	0	0	1	2	0	0	1	1	1	3	0	1	2	0	4	6	3	2	9	9	0	6	4	33	0	32	11	0	6	0
chr11:46098304-46140351	46098304	46140351	0	0	1	0	0	0	1	0	0	1	0	0	0	0	0	0	0	0	0	0	0	0	0	0	0	0	0	2	0	0	0	0	0	4	0	9	0	0	0	0
chr11:46100684-46113774	46100684	46113774	0	0	0	0	0	0	0	0	0	0	0	0	0	0	0	0	0	0	0	0	0	0	0	0	0	1	1	0	3	7	0	0	1	0	0	5	0	0	5	0
chr11:46105716-46113774	46105716	46113774	0	0	0	0	0	0	0	0	0	0	0	0	0	1	0	0	0	0	0	0	0	2	0	0	0	0	0	0	2	0	0	0	0	3	3	2	3	0	0	0
chr11:46331539-46334470	46331539	46334470	0	0	0	0	0	0	0	0	0	0	0	0	0	0	0	0	0	0	0	0	0	0	0	0	2	0	0	0	0	0	0	0	0	0	0	0	0	0	0	0
chr11:46332582-46334470	46332582	46334470	0	0	0	0	0	0	0	0	0	0	0	0	0	0	0	0	0	0	0	0	0	0	0	0	0	0	2	0	0	0	0	0	0	0	0	0	0	0	0	0
chr11:46333875-46334470	92667750	92668940	0	0	0	0	0	0	0	0	0	0	0	0	0	0	0	0	0	0	0	0	0	1	1	1	5	2	2	0	6	0	0	0	4	6	5	15	0	5	0	0
chr11:46430062-46534363	46430062	46534363	0	0	0	0	0	0	0	0	0	0	0	0	0	0	0	0	0	0	0	0	0	0	0	0	0	0	0	0	3	0	0	0	0	0	0	0	0	0	0	0
chr11:46431825-46455178	46431825	46455178	0	0	0	0	0	0	0	0	0	0	0	0	0	0	0	0	0	0	0	0	0	0	0	0	2	0	0	0	2	0	0	0	0	0	0	1	0	0	0	0
chr11:46455023-46529920	46455023	46529920	0	0	0	0	0	0	0	0	0	0	0	0	0	0	0	0	0	0	0	0	0	0	0	0	0	0	0	0	1	0	0	0	0	0	0	0	3	0	0	0
chr11:46515157-46529920	46515157	46529920	0	0	0	1	1	0	0	0	0	0	1	0	0	0	0	0	0	0	1	0	0	0	0	0	0	0	0	1	0	0	0	0	0	2	0	3	0	0	0	0
chr11:46515157-46534363	46515157	46534363	0	0	1	0	0	1	0	0	0	0	0	0	0	0	0	0	2	0	0	0	1	0	0	0	0	2	0	1	0	0	0	0	0	2	0	0	0	0	0	0
chr11:46515157-46570050	46515157	46570050	0	1	0	0	0	0	0	0	0	0	0	0	0	0	1	1	0	1	0	1	1	1	1	0	0	0	0	2	0	0	0	0	0	0	0	0	1	0	0	8
chr11:46529740-46534363	46529740	46534363	0	0	0	0	0	0	0	0	0	0	0	0	0	0	0	1	0	0	0	0	1	0	0	0	0	0	0	0	0	0	0	0	0	0	0	2	0	0	0	0
chr11:46563494-46564948	46563494	46564948	0	0	0	0	0	0	0	0	0	0	0	0	0	0	0	0	0	0	0	0	0	0	0	0	0	0	0	0	0	0	0	0	0	0	3	0	0	0	0	0
chr11:46563494-46565591	46563494	46565591	0	0	0	0	0	0	0	0	0	0	0	0	0	0	0	0	0	0	0	0	2	1	0	0	0	0	0	0	4	0	0	0	0	0	1	3	0	0	0	0
chr11:46563494-46570050	46563494	46570050	0	0	0	0	0	0	0	0	0	0	0	0	0	0	0	0	0	0	0	0	0	2	1	0	3	3	0	4	0	0	0	0	0	0	4	3	0	0	0	0
chr11:46568662-46570050	46568662	46570050	0	0	0	0	0	0	0	0	0	0	0	0	0	1	0	0	0	0	1	0	0	0	0	1	0	1	0	0	2	0	0	0	0	0	0	4	0	0	4	0
chr11:46569366-46570050	46569366	46570050	0	0	0	0	0	0	0	0	0	0	0	0	0	0	0	0	0	0	0	0	1	0	0	0	0	0	0	0	2	0	0	0	0	0	0	0	0	0	0	0
chr11:46717209-46717706	46717209	46717706	0	0	0	0	0	0	0	0	0	0	0	0	0	0	0	0	0	0	0	0	0	0	0	0	0	0	0	0	0	0	0	0	0	0	2	0	0	0	0	0
chr11:46771823-46773084	46771823	46773084	0	0	1	0	0	0	0	0	0	0	0	0	0	0	0	0	0	0	0	0	0	0	0	0	0	0	0	0	0	0	0	0	0	8	0	0	0	0	0	0
chr11:46774184-46782334	46774184	46782334	0	0	0	0	0	0	0	0	0	0	0	0	0	0	0	0	0	0	0	0	0	0	0	0	0	0	0	0	0	0	0	0	0	0	0	0	0	0	4	0
chr11:46776437-46782334	46776437	46782334	0	0	0	0	0	0	0	0	1	0	0	0	0	1	0	0	0	0	0	0	1	0	0	1	0	0	0	0	2	2	0	0	2	3	0	0	6	0	7	0
chr11:46776437-46837955	46776437	46837955	0	0	0	0	0	0	0	0	0	0	0	0	0	0	0	0	0	0	0	0	0	0	0	0	0	0	0	0	2	0	0	0	0	0	0	0	0	0	0	0
chr11:46791512-46810323	46791512	46810323	0	0	0	0	0	0	0	0	0	0	0	0	0	0	0	0	0	1	0	0	0	0	1	0	1	3	0	1	2	0	0	0	0	0	0	0	0	0	0	0
chr11:46804823-46818490	46804823	46818490	0	0	0	0	0	0	0	0	0	0	0	0	0	0	0	0	0	1	0	0	0	0	0	0	0	0	0	0	0	0	0	0	3	0	0	0	0	0	0	0
chr11:46811625-46842819	46811625	46842819	0	0	0	0	0	0	0	0	0	0	0	0	0	0	0	0	0	0	0	0	0	0	0	0	0	2	0	0	0	0	0	0	0	0	0	0	0	0	0	0
chr11:46817143-46831424	46817143	46831424	0	0	0	0	0	0	0	0	0	0	0	0	0	0	0	0	0	0	1	0	0	0	0	0	0	0	0	0	0	0	0	0	0	0	3	0	0	0	0	0
chr11:46817143-46842819	46817143	46842819	0	0	0	1	0	0	0	0	0	0	0	0	0	0	0	0	0	0	0	0	0	0	0	0	0	0	0	0	0	0	0	0	0	0	0	0	5	0	0	0
chr11:46829580-46831424	46829580	46831424	1	0	0	0	0	0	0	0	0	0	0	0	0	0	1	1	0	0	0	0	0	0	0	0	0	2	0	0	0	2	0	0	0	0	0	0	0	0	0	0
chr11:46829580-46842819	46829580	46842819	1	0	0	0	0	0	0	0	0	0	0	0	0	2	0	0	0	1	0	0	0	3	1	2	1	0	0	1	0	11	0	0	0	0	4	2	0	0	0	0
chr11:46831291-46842819	46831291	46842819	0	0	0	0	0	0	0	0	0	0	0	0	0	0	0	0	0	0	0	0	0	0	0	0	0	0	0	0	0	0	0	0	0	0	0	2	0	0	0	0
chr11:46832556-46837955	46832556	46837955	0	0	0	0	0	0	0	0	0	0	0	0	0	0	0	0	0	0	0	0	0	0	0	0	0	0	0	0	0	0	0	0	0	0	0	2	0	0	0	0
chr11:46832556-46842819	46832556	46842819	0	1	0	0	0	0	0	0	0	0	1	0	0	0	0	0	0	0	0	0	0	0	0	0	0	0	0	0	0	0	0	6	0	4	0	0	0	0	0	0
chr11:46837748-46842819	46837748	46842819	0	0	0	0	0	0	0	0	0	0	0	0	1	0	0	0	1	0	0	0	0	0	0	0	0	1	0	0	0	0	0	1	0	0	0	0	0	5	0	0
chr11:47187818-47189802	47187818	47189802	0	0	0	0	0	0	0	0	0	0	0	0	0	0	1	0	0	0	0	0	0	0	0	0	0	0	0	0	1	0	0	0	2	0	0	0	0	0	0	7
chr11:47500428-47510576	47500428	47510576	0	0	0	0	0	0	0	0	0	0	0	0	0	0	0	0	0	0	0	0	0	0	0	0	0	3	0	0	0	0	0	0	0	0	0	0	0	0	0	0
chr11:47504246-47510576	47504246	47510576	0	0	0	0	0	0	0	0	0	0	0	0	0	0	0	0	0	0	0	0	0	0	0	0	0	0	0	0	0	0	0	0	0	2	0	0	0	0	0	0
chr11:47505940-47508350	47505940	47508350	0	0	0	0	0	0	0	0	0	0	0	0	0	0	0	0	0	0	1	0	0	0	0	0	0	0	0	0	0	0	0	0	0	0	0	0	0	4	0	0
chr11:47508301-47510576	47508301	47510576	0	0	0	0	0	0	0	0	0	0	0	0	0	0	0	0	0	0	0	0	0	1	0	0	1	0	0	2	0	0	0	0	0	0	2	1	6	0	0	0
chr11:47508301-47522484	47508301	47522484	0	0	0	0	0	0	0	0	0	0	0	0	0	0	0	0	0	0	0	0	0	0	0	0	0	0	0	0	0	0	0	0	0	3	1	1	0	0	2	0
chr11:47521004-47522484	47521004	47522484	0	0	0	0	0	0	0	0	0	0	0	0	0	0	0	0	0	0	0	0	0	0	0	0	0	0	0	0	0	0	0	0	0	0	0	3	0	0	0	0
chr11:47647225-47648679	47647225	47648679	1	0	0	0	0	0	0	0	3	1	0	1	0	0	0	1	0	0	0	1	0	0	0	0	0	0	0	1	0	0	0	0	2	0	0	1	0	0	0	0
chr11:47648631-47657123	47648631	47657123	0	0	1	0	0	1	0	0	0	0	0	0	1	0	0	0	0	0	0	0	0	0	0	0	0	0	0	0	0	0	0	0	0	0	5	3	0	0	0	0
chr11:47648631-47660603	47648631	47660603	0	0	0	0	0	0	0	0	0	0	0	0	0	0	0	0	0	0	0	0	0	0	0	0	0	0	0	0	0	0	0	0	6	0	0	0	0	0	0	0
chr11:47741480-47744868	47741480	47744868	0	0	0	0	0	0	0	0	0	0	0	0	0	0	0	0	0	0	0	0	0	0	0	0	0	0	0	0	0	0	0	0	0	0	0	3	0	0	0	0
chr11:47741480-47746330	47741480	47746330	0	0	0	0	0	0	0	0	0	0	0	0	0	0	0	0	0	0	0	0	0	0	0	0	0	0	0	0	3	0	0	0	0	0	0	0	0	0	0	0
chr11:47744527-47744868	47744527	47744868	0	0	0	0	0	0	0	0	0	0	0	0	0	0	0	0	0	1	0	0	0	0	0	0	1	0	0	0	0	0	0	0	0	0	0	3	0	0	2	0
chr11:47752925-47755681	47752925	47755681	0	0	0	0	0	0	0	0	0	0	0	0	0	0	0	0	0	0	0	0	0	0	0	0	0	0	0	0	1	0	0	0	0	0	0	0	4	0	0	0
chr11:47752925-47772842	47752925	47772842	0	0	0	0	0	0	0	0	0	0	0	0	1	0	0	0	0	0	0	0	0	0	0	0	0	0	0	0	0	0	0	0	0	0	6	0	0	0	0	0
chr11:47765504-47767946	47765504	47767946	0	0	0	0	0	0	0	0	0	0	0	0	0	0	0	0	0	0	0	0	0	0	0	0	0	0	0	1	0	0	0	0	0	0	3	0	0	0	0	0
chr11:47767607-47772842	47767607	47772842	0	0	0	0	0	0	0	0	0	0	0	0	0	0	0	0	0	0	0	0	0	0	0	0	0	0	0	0	0	0	0	0	0	0	9	0	0	0	0	0
chr11:47767607-47786914	47767607	47786914	0	0	0	0	0	0	0	0	0	0	0	0	0	0	0	0	0	0	0	0	0	0	0	0	0	0	0	0	0	0	0	0	0	3	0	0	4	0	0	0
chr11:47772467-47772842	47772467	47772842	0	0	0	0	0	0	0	0	0	0	0	0	0	0	0	0	0	0	1	0	0	0	0	1	0	1	0	0	0	0	0	6	0	0	0	2	0	0	0	0
chr11:47772467-47774654	47772467	47774654	0	0	0	0	0	0	0	0	0	0	0	0	0	0	0	0	0	0	0	0	0	0	0	0	0	0	0	0	0	0	0	0	0	4	0	0	0	0	0	0
chr11:47774467-47776216	47774467	47776216	1	1	0	0	0	0	0	0	0	1	0	0	0	1	0	0	0	0	2	0	1	0	0	1	0	0	0	0	3	0	0	0	0	4	0	0	4	0	0	0
chr11:47834418-47841010	47834418	47841010	0	0	0	0	0	0	0	0	0	0	0	0	0	0	0	0	0	0	0	0	0	0	0	0	0	0	0	0	0	0	0	0	0	0	0	3	0	0	0	0
chr11:47837030-47841010	47837030	47841010	0	0	0	0	0	0	2	0	0	0	0	0	0	0	0	0	0	0	0	0	0	0	0	0	0	0	0	0	0	0	0	0	0	0	0	0	0	0	0	0
chr11:47857202-47859175	47857202	47859175	0	0	1	0	0	0	0	1	0	0	0	0	0	0	0	0	0	0	1	0	0	0	0	0	2	0	0	0	0	0	0	0	0	0	0	0	0	0	0	0
chr11:5246966-5247806	5246966	5247806	0	0	0	0	0	0	0	0	0	0	0	0	0	0	0	0	0	0	0	0	0	0	0	0	0	0	0	0	0	0	0	0	0	0	4	0	0	0	0	0
chr11:57188444-57188846	57188444	57188846	0	0	0	0	0	0	0	0	0	0	0	0	0	0	0	0	0	0	1	0	0	0	0	0	0	0	0	0	0	0	0	0	0	0	0	3	0	0	0	0
chr11:5719544-5727846	5719544	5727846	0	0	0	0	0	0	0	0	0	0	0	0	0	0	0	0	0	0	0	0	0	0	0	0	0	0	0	0	0	0	0	6	0	0	0	0	0	0	0	0
chr11:57256388-57256865	57256388	57256865	0	0	0	0	0	0	1	0	0	0	0	0	0	0	0	0	0	0	0	0	0	0	0	0	0	0	0	0	3	0	0	0	0	0	0	0	0	0	0	0
chr11:57258696-57259335	57258696	57259335	1	2	2	1	0	1	2	1	0	1	2	0	4	3	2	1	1	3	6	2	1	1	0	0	6	1	1	2	3	0	0	0	0	1	0	5	0	0	3	0
chr11:57426926-57427554	57426926	57427554	0	0	0	0	0	0	0	0	0	0	0	0	0	0	0	0	0	0	0	0	0	0	0	0	0	0	0	1	1	0	0	0	0	0	8	4	0	0	2	0
chr11:57439492-57450015	57439492	57450015	0	0	0	0	0	0	0	0	0	0	0	0	0	0	0	0	0	0	0	0	0	0	0	0	0	0	0	0	1	0	0	0	4	0	0	0	0	0	0	0
chr11:57455979-57461387	57455979	57461387	0	0	0	0	0	0	0	0	0	0	0	0	0	0	0	0	0	0	0	0	0	0	0	0	0	0	0	0	0	0	0	0	0	0	2	0	0	0	0	0
chr11:57563048-57569668	57563048	57569668	0	0	0	0	0	0	0	0	0	0	0	0	0	0	0	0	0	0	0	0	0	0	0	0	0	0	0	0	0	0	0	0	0	2	0	0	0	0	0	0
chr11:57575861-57582972	57575861	57582972	0	0	0	0	0	0	0	0	0	0	0	0	0	0	0	0	0	0	0	0	0	0	0	1	2	0	0	0	0	0	0	0	0	0	0	0	0	0	0	0
chr11:58317258-58338186	58317258	58338186	0	0	0	0	0	0	0	0	0	0	0	0	0	0	1	0	0	0	0	0	0	0	0	0	0	0	0	0	0	0	0	0	0	4	0	1	0	0	0	0
chr11:58352328-58380313	58352328	58380313	0	0	0	0	0	0	0	0	0	0	0	0	0	0	0	0	0	0	0	0	0	0	0	0	0	0	0	0	0	0	0	0	0	2	0	1	0	0	0	0
chr11:58352328-58381816	58352328	58381816	0	0	0	0	0	0	0	0	0	0	0	0	0	0	0	0	0	0	0	0	0	0	0	0	0	0	0	0	0	0	0	0	0	4	6	0	0	0	0	0
chr11:58352328-58384288	58352328	58384288	0	0	0	0	0	0	0	0	0	0	0	0	0	0	0	0	0	1	0	0	0	0	0	0	0	0	0	0	0	0	0	0	0	0	2	0	0	0	0	0
chr11:58377302-58379801	58377302	58379801	0	0	0	0	0	0	0	0	0	0	0	0	0	0	0	0	0	0	0	0	0	0	0	0	0	0	0	0	0	0	0	0	2	0	0	0	0	0	0	0
chr11:58377302-58384288	58377302	58384288	0	0	0	0	0	0	0	0	0	0	0	0	0	0	0	0	0	0	0	0	1	0	0	0	0	0	0	0	0	0	0	0	0	2	0	2	0	0	0	0
chr11:587258-601701	587258	601701	0	0	0	0	0	0	0	0	0	0	0	0	0	0	0	0	0	0	0	0	0	0	0	0	0	0	0	0	3	0	0	0	0	0	0	0	0	0	0	0
chr11:591383-598502	591383	598502	0	0	0	0	0	0	0	0	0	0	0	0	0	0	0	0	0	0	0	0	0	0	0	0	0	0	0	0	0	0	0	0	0	4	0	0	0	0	0	0
chr11:59345621-59368858	59345621	59368858	0	0	0	0	0	0	0	0	0	0	0	0	0	0	0	0	0	0	0	0	0	0	0	0	0	0	0	0	0	0	0	0	0	0	0	3	0	0	0	0
chr11:59375956-59378062	59375956	59378062	0	0	0	0	0	0	0	0	0	0	0	0	0	0	0	0	0	0	0	0	0	0	0	0	0	0	0	2	0	0	0	0	0	0	0	0	0	0	0	0
chr11:59406520-59410508	59406520	59410508	0	0	0	0	0	0	0	0	0	0	0	0	0	0	0	0	0	0	0	0	0	0	1	0	1	0	0	0	0	0	0	0	0	0	4	0	0	0	0	0
chr11:59426338-59426942	59426338	59426942	0	1	0	0	0	0	0	0	0	1	0	0	0	0	0	0	1	0	1	0	0	0	0	0	2	0	0	0	4	3	0	0	0	0	3	0	0	0	3	0
chr11:61031958-61032684	61031958	61032684	0	0	0	0	0	0	0	0	0	0	0	0	0	0	0	0	0	0	0	0	0	0	0	0	0	0	0	0	0	3	0	0	0	0	0	0	0	0	0	0
chr11:61031958-61059048	61031958	61059048	0	0	0	0	0	0	0	0	0	0	0	0	0	0	0	0	0	0	0	0	0	0	0	0	0	0	0	0	0	0	0	0	0	4	0	0	0	0	0	0
chr11:610347-610644	610347	610644	0	0	0	0	0	0	0	0	0	0	0	0	0	0	0	0	0	2	0	0	0	0	0	0	0	0	0	0	0	0	0	0	0	0	0	0	0	0	0	0
chr11:61040670-61053902	61040670	61053902	0	0	0	0	0	0	0	0	0	0	0	0	0	0	0	0	0	0	0	0	0	0	0	0	0	0	0	0	0	0	0	0	0	0	3	0	0	0	0	0
chr11:61058270-61059048	61058270	61059048	0	0	0	0	0	0	0	0	0	0	0	0	0	0	0	0	0	0	0	0	0	0	0	0	0	0	0	0	2	3	0	0	0	0	0	0	0	0	0	0
chr11:61076454-61084039	61076454	61084039	0	0	0	0	0	0	0	0	0	0	0	0	0	0	0	0	0	0	0	0	0	0	0	0	0	0	2	0	0	0	0	0	0	0	0	0	0	0	0	0
chr11:61079255-61097546	61079255	61097546	0	0	0	0	0	0	0	0	0	0	0	0	0	0	0	0	0	0	0	0	0	0	0	0	0	0	0	0	0	0	0	0	0	0	0	0	3	0	0	0
chr11:61083756-61094365	61083756	61094365	0	0	0	0	0	0	0	0	0	0	0	0	0	0	0	0	0	0	0	0	0	0	0	0	0	0	0	0	0	0	0	0	0	0	2	2	0	0	0	0
chr11:61091450-61094365	61091450	61094365	0	0	0	0	0	0	0	0	0	0	0	0	0	0	0	0	0	0	0	0	0	0	0	0	0	2	0	0	2	0	0	0	0	0	0	0	0	0	0	0
chr11:61093082-61097546	61093082	61097546	0	0	0	0	0	0	0	0	0	0	0	0	0	0	0	0	0	0	0	0	0	0	0	0	0	0	0	0	0	0	0	0	0	0	2	0	0	0	0	0
chr11:61094250-61097546	61094250	61097546	0	0	0	0	0	0	0	0	1	0	0	0	0	0	0	0	0	0	0	0	0	0	0	0	0	0	0	0	0	0	0	0	2	2	3	0	3	0	8	0
chr11:61096834-61097546	61096834	61097546	0	0	0	0	0	0	0	0	0	0	0	0	0	0	0	0	0	0	0	0	0	0	0	0	0	1	0	0	0	0	0	0	0	0	0	0	6	0	0	0
chr11:61118462-61121464	61118462	61121464	0	0	0	0	0	0	0	0	0	0	0	0	0	0	0	0	0	0	0	0	0	0	0	0	0	0	0	0	0	0	0	0	0	0	3	0	0	0	0	0
chr11:61133516-61133688	61133516	61133688	0	0	0	0	0	0	0	0	0	2	0	0	0	0	0	0	0	0	0	0	0	0	0	0	0	0	0	0	0	0	0	0	0	0	0	0	0	0	0	0
chr11:61133516-61135470	122267032	122270940	1	1	2	1	0	1	2	2	2	2	1	3	4	2	1	1	2	2	0	5	2	2	3	1	3	1	0	2	4	4	0	0	7	24	7	4	15	0	0	0
chr11:61574135-61578547	61574135	61578547	0	0	0	0	0	0	0	0	1	0	0	1	0	0	1	0	1	0	0	0	0	0	0	0	2	0	0	0	1	0	0	0	0	1	0	0	0	0	0	0
chr11:61630443-61631258	61630443	61631258	0	0	0	0	0	0	0	0	0	0	0	0	0	0	0	0	3	0	0	0	0	0	0	0	0	0	0	0	0	0	0	0	0	0	0	0	0	0	0	0
chr11:61674864-61675778	123349728	123351556	0	0	0	0	0	0	0	0	0	0	0	0	0	0	0	0	0	0	0	0	0	0	0	0	0	0	0	0	0	0	0	0	1	0	4	0	0	1	4	0
chr11:61895622-61898062	61895622	61898062	1	0	0	0	0	0	0	0	0	0	0	0	0	1	1	0	0	0	0	0	0	0	0	1	0	0	0	2	0	0	0	0	0	0	0	0	0	0	0	0
chr11:61905303-61906477	61905303	61906477	0	0	0	0	0	0	0	0	0	2	0	0	0	0	0	0	0	0	0	0	0	0	0	0	0	0	0	0	0	0	0	0	0	0	0	0	0	0	0	0
chr11:62406454-62407203	62406454	62407203	0	1	0	3	0	0	0	0	0	0	0	0	0	0	0	0	0	0	0	0	2	0	1	0	0	1	2	0	0	0	0	0	2	2	0	2	0	0	0	0
chr11:62430707-62437275	62430707	62437275	0	0	0	0	0	0	0	0	0	0	0	0	0	0	0	0	0	0	0	0	0	0	0	0	0	0	0	0	0	0	0	0	0	2	0	0	0	0	0	0
chr11:62487494-62491198	62487494	62491198	0	0	0	0	0	0	0	0	0	0	0	0	0	0	0	0	0	0	0	0	0	0	0	0	0	0	0	0	1	3	0	0	0	0	0	0	0	0	0	0
chr11:62489291-62491198	62489291	62491198	0	0	0	0	0	0	0	0	0	0	0	0	0	0	0	0	0	0	0	0	0	0	0	0	0	0	0	0	0	1	0	0	5	0	0	0	0	0	0	0
chr11:62491058-62491898	62491058	62491898	0	1	0	0	1	0	0	0	0	0	0	0	0	0	0	0	1	0	0	0	0	0	0	0	0	0	0	0	1	3	0	0	0	0	0	2	0	0	0	2
chr11:62560112-62564039	62560112	62564039	0	0	0	0	0	0	0	0	0	0	0	0	0	0	0	0	0	0	0	0	0	0	0	0	0	0	0	0	0	0	0	0	0	0	0	2	0	0	0	0
chr11:62560112-62569732	62560112	62569732	0	0	0	0	0	0	0	0	0	0	0	0	0	0	0	0	0	0	0	0	0	0	0	0	0	0	0	0	0	0	0	0	0	5	0	0	0	0	0	0
chr11:62561729-62564858	62561729	62564858	0	0	0	0	0	0	0	0	0	0	0	0	0	0	0	0	0	0	0	0	0	0	0	0	0	0	0	0	1	0	0	0	0	1	2	0	0	0	0	0
chr11:62562406-62571450	62562406	62571450	0	0	0	0	0	0	0	0	0	0	0	0	0	0	0	0	0	0	0	0	0	0	0	0	0	0	0	0	0	0	0	0	0	4	0	2	0	0	0	0
chr11:62563372-62567958	62563372	62567958	0	0	0	0	0	0	0	0	0	0	0	0	0	0	0	0	0	0	0	0	0	0	0	0	1	0	0	0	1	6	0	0	1	3	8	2	3	0	3	0
chr11:62564654-62569103	62564654	62569103	0	0	0	0	0	0	0	0	0	0	0	0	0	0	0	0	0	0	0	0	0	0	0	0	0	0	0	0	2	0	0	0	0	0	0	2	0	0	0	0
chr11:62564654-62569732	62564654	62569732	0	0	0	0	0	0	0	0	0	0	0	0	0	0	0	0	0	0	0	0	0	0	0	0	0	0	0	0	0	0	0	0	0	0	0	3	0	0	0	0
chr11:62564789-62568889	62564789	62568889	0	0	0	0	0	0	0	0	0	0	0	0	0	0	0	0	0	0	0	0	0	0	0	0	0	0	0	0	0	0	0	0	0	0	2	0	0	0	0	0
chr11:62566010-62567958	125132020	125135916	0	0	0	0	0	0	0	0	0	0	0	0	0	0	0	0	0	0	0	0	0	0	0	0	0	2	2	0	11	0	0	0	7	3	3	10	8	0	4	0
chr11:62567848-62569291	62567848	62569291	0	0	0	0	0	0	0	0	0	0	0	0	0	0	0	0	0	0	0	0	0	0	0	0	0	2	0	0	0	0	0	0	0	2	0	0	0	0	0	0
chr11:62568800-62569732	62568800	62569732	0	0	0	0	0	0	0	0	0	0	0	0	0	0	0	0	0	0	0	0	0	0	0	0	0	0	0	0	2	3	0	0	0	2	0	4	0	0	0	0
chr11:62569413-62571450	62569413	62571450	0	0	0	0	0	0	0	0	0	0	0	0	0	0	0	0	0	0	0	0	0	0	0	0	0	0	0	0	3	0	0	0	0	0	0	0	0	0	0	0
chr11:62572800-62573346	62572800	62573346	0	0	0	0	0	0	0	0	0	0	0	0	0	0	0	0	0	0	0	0	0	0	0	0	0	2	0	0	0	0	0	0	0	0	0	0	0	0	0	0
chr11:62591637-62593011	125183274	125186022	0	0	0	0	0	0	0	0	0	0	0	0	0	0	0	0	0	0	0	0	0	0	0	0	1	3	0	0	3	0	0	0	0	0	9	4	0	0	0	0
chr11:62591637-62595103	62591637	62595103	0	0	0	0	0	0	0	0	0	0	0	0	0	0	0	0	0	0	0	1	0	0	0	0	0	0	1	1	0	0	0	0	4	4	6	4	0	0	0	7
chr11:62594626-62595103	62594626	62595103	0	0	0	0	0	0	0	0	1	0	0	1	0	0	0	0	0	0	0	0	1	0	0	0	0	0	0	0	1	0	0	0	0	2	0	0	0	0	0	0
chr11:62606585-62607131	62606585	62607131	0	0	0	0	0	0	0	0	0	0	0	0	0	0	0	0	0	0	0	0	0	0	0	0	0	0	0	0	3	0	0	0	0	5	0	0	0	0	0	0
chr11:62606585-62607339	125213170	125214678	0	0	0	0	0	0	0	0	0	0	0	0	0	0	0	0	1	1	0	0	0	0	1	0	1	1	0	0	3	0	0	0	0	3	4	4	0	0	0	0
chr11:62620282-62621305	62620282	62621305	0	0	0	0	0	0	0	0	0	0	0	0	0	0	0	0	0	0	0	0	0	0	0	0	0	0	0	0	0	0	0	0	0	7	0	0	0	0	0	0
chr11:62620282-62621536	62620282	62621536	0	0	0	0	0	0	0	0	0	0	0	0	0	0	0	0	0	0	0	0	0	0	0	0	0	0	0	0	0	0	0	0	0	0	4	0	0	0	0	0
chr11:62620546-62622938	62620546	62622938	0	0	0	0	0	0	0	0	0	0	0	0	0	0	0	0	0	0	0	0	0	0	0	0	0	0	0	0	0	0	0	0	0	0	0	0	0	0	3	0
chr11:62621272-62623217	62621272	62623217	0	0	0	0	0	0	0	0	0	0	0	0	0	0	0	0	0	0	0	0	0	0	0	0	0	0	0	0	0	0	0	0	0	0	0	5	0	0	0	0
chr11:62650379-62653080	62650379	62653080	0	0	0	0	0	0	1	1	1	0	0	0	0	0	0	0	0	0	0	0	0	0	0	0	0	0	0	1	0	0	0	0	0	3	1	0	0	0	0	0
chr11:63419942-63426724	63419942	63426724	0	0	0	0	0	0	0	0	0	0	0	0	0	0	0	0	0	0	0	0	0	0	0	0	0	0	0	0	0	0	0	0	0	0	0	0	6	0	0	0
chr11:63472322-63488504	63472322	63488504	0	0	0	0	0	0	0	0	0	0	0	0	0	0	0	0	0	0	0	0	0	0	0	0	0	2	0	0	0	0	0	0	4	0	0	0	0	0	0	0
chr11:63486173-63488504	63486173	63488504	0	0	0	0	0	0	0	0	0	0	0	0	0	0	0	0	0	0	0	0	0	0	1	0	0	0	0	1	0	0	0	0	6	2	17	11	4	0	1	0
chr11:63517462-63521180	63517462	63521180	0	0	0	0	0	0	0	0	0	0	0	0	0	0	0	0	0	0	0	0	0	0	0	1	0	0	0	0	0	1	0	0	0	0	4	2	0	0	0	0
chr11:63662630-63663105	63662630	63663105	0	0	0	0	0	0	0	0	0	0	0	0	0	0	0	0	0	0	0	0	0	0	0	0	0	0	1	0	0	0	0	0	4	0	0	0	0	0	0	0
chr11:63960549-63962092	63960549	63962092	0	0	0	0	0	0	0	0	0	0	0	0	0	0	0	0	0	0	0	0	0	0	0	0	0	0	0	0	0	0	0	0	0	0	3	0	0	0	0	0
chr11:63960549-63967765	63960549	63967765	0	0	0	0	0	0	0	0	0	0	0	0	0	0	0	0	0	0	0	0	0	0	0	0	3	0	0	0	0	0	0	0	0	0	0	2	0	0	0	0
chr11:63961660-63967765	63961660	63967765	0	0	0	0	0	0	0	0	0	0	0	0	0	0	0	0	0	0	0	0	0	0	0	0	0	0	0	0	0	0	0	0	0	0	0	0	0	0	4	0
chr11:63961950-63967765	63961950	63967765	0	0	0	0	0	0	0	0	0	0	0	0	0	0	0	0	0	0	0	0	0	0	0	0	0	0	0	0	1	0	0	0	0	1	3	0	0	1	0	0
chr11:63963116-63965446	63963116	63965446	0	0	0	0	0	0	0	0	0	0	0	0	0	0	0	0	1	0	1	0	0	0	0	0	0	0	0	0	0	0	0	0	2	0	0	1	0	0	0	0
chr11:64116802-64117140	64116802	64117140	0	0	0	0	0	0	0	0	0	0	0	0	0	0	0	0	0	0	0	0	0	0	0	0	0	0	0	0	0	0	0	0	0	0	0	0	0	0	5	0
chr11:64453117-64453419	64453117	64453419	0	0	0	0	0	0	0	0	0	0	0	0	0	0	0	0	0	0	0	0	0	0	0	0	0	0	0	0	2	0	0	0	0	1	0	1	0	0	0	0
chr11:64521350-64525382	64521350	64525382	0	0	0	0	0	0	0	0	0	0	0	0	0	0	0	0	0	0	0	0	0	0	0	0	0	0	0	0	0	0	0	0	0	3	0	0	0	0	0	0
chr11:64525250-64526176	64525250	64526176	0	0	0	0	0	0	0	0	0	0	0	0	0	0	0	0	0	0	0	0	0	0	0	0	0	0	1	0	1	0	0	0	0	0	8	4	0	0	0	1
chr11:64534371-64537880	64534371	64537880	0	0	0	0	0	0	0	0	0	0	0	0	0	0	0	0	0	0	0	0	0	0	0	0	0	0	0	0	0	0	0	0	0	0	2	0	0	0	4	0
chr11:64536493-64537525	64536493	64537525	0	0	0	0	0	0	0	0	0	0	0	0	0	0	0	0	0	0	0	0	0	0	0	0	0	1	0	0	0	0	0	0	7	0	0	0	0	0	0	0
chr11:64536493-64537880	64536493	64537880	0	0	0	0	0	0	0	0	0	0	0	0	0	0	0	0	0	0	0	0	0	0	0	0	0	0	0	0	0	0	0	0	0	0	4	0	0	0	0	0
chr11:64543969-64544098	64543969	64544098	0	1	0	0	0	0	0	0	0	0	0	0	0	0	0	0	0	0	0	0	0	0	0	0	0	0	0	0	0	0	0	0	0	0	0	2	0	0	0	0
chr11:64627395-64627808	64627395	64627808	0	0	0	0	0	0	0	0	0	0	0	0	0	0	0	0	0	0	0	0	1	1	0	0	1	0	0	0	0	0	0	0	0	5	0	1	0	0	0	0
chr11:64627395-64641990	64627395	64641990	0	0	0	0	0	0	0	0	0	0	0	0	0	0	0	0	0	0	0	0	0	0	0	0	0	0	0	0	0	0	0	0	0	2	0	0	0	0	0	0
chr11:64627395-64645959	64627395	64645959	0	0	0	0	0	0	0	0	0	0	0	0	0	0	0	0	0	0	0	0	0	0	0	0	0	0	0	0	0	0	0	0	0	2	0	0	0	0	0	0
chr11:64695273-64698061	64695273	64698061	0	0	0	0	0	0	0	0	0	0	0	0	0	0	0	1	0	0	0	0	0	1	1	0	3	1	2	2	0	0	0	0	0	0	1	3	4	0	0	0
chr11:64897722-64899822	64897722	64899822	0	0	0	0	0	0	0	0	0	0	0	0	0	0	0	0	0	0	0	0	0	0	0	0	0	0	0	0	0	0	0	0	0	0	0	2	0	0	0	0
chr11:65161043-65161896	130322086	130323792	0	0	0	0	0	0	0	0	0	0	0	0	0	0	0	0	0	0	0	0	0	0	0	0	0	0	0	2	2	0	0	0	0	1	0	2	0	0	1	0
chr11:65164269-65172539	65164269	65172539	0	0	0	0	0	0	0	0	0	0	0	0	0	0	0	0	0	0	0	0	0	0	0	0	0	0	0	0	2	0	0	0	0	0	0	0	0	0	0	0
chr11:65318596-65319035	130637192	130638070	0	0	0	0	0	0	0	0	0	0	0	0	0	0	0	0	0	0	0	0	0	0	0	0	0	0	2	0	0	0	0	0	0	0	0	0	0	0	0	0
chr11:65661484-65664477	131322968	131328954	0	0	0	0	0	0	0	0	0	0	0	0	0	0	0	0	0	0	0	0	0	0	0	0	0	0	0	0	0	0	0	0	0	0	0	3	0	0	0	0
chr11:66367107-66367935	66367107	66367935	0	0	0	0	0	0	0	0	0	0	0	0	0	0	0	0	0	0	0	0	1	0	0	0	0	2	0	0	0	0	0	0	0	2	5	0	0	0	0	0
chr11:66407170-66407594	66407170	66407594	0	1	0	0	0	0	0	0	1	0	0	0	1	1	0	1	3	0	0	0	0	1	0	0	1	0	0	1	0	0	0	0	0	2	0	0	0	0	0	0
chr11:66410920-66411611	66410920	66411611	0	0	0	0	0	0	0	0	0	0	0	0	0	0	0	0	0	0	0	0	0	0	0	0	0	0	0	0	0	0	0	0	0	0	0	0	4	0	0	0
chr11:66436085-66444562	66436085	66444562	0	0	0	0	0	0	0	0	0	0	0	0	0	0	0	0	0	0	0	0	0	0	0	0	0	0	0	0	0	0	0	0	3	0	0	0	0	0	0	0
chr11:66568111-66590145	66568111	66590145	0	0	0	0	0	0	0	0	0	0	0	0	0	0	0	0	0	0	0	0	0	0	0	0	0	0	0	0	0	0	0	0	0	0	3	0	0	0	0	0
chr11:66589113-66595835	66589113	66595835	0	0	0	0	0	0	0	0	0	0	0	0	0	0	0	0	0	0	0	0	0	0	0	0	0	0	0	0	0	0	0	0	0	0	0	3	0	0	0	0
chr11:66888704-66949363	66888704	66949363	0	0	0	0	0	0	0	0	0	0	0	0	0	0	0	0	0	0	0	0	0	0	0	0	0	0	0	0	0	0	0	0	2	0	0	0	0	0	0	0
chr11:66947549-66949363	66947549	66949363	1	0	0	0	0	0	0	0	0	0	0	0	0	0	0	0	0	0	0	0	1	0	0	0	0	0	0	0	0	0	0	0	0	7	2	0	0	0	0	0
chr11:66947549-66983420	66947549	66983420	0	0	0	0	0	0	0	0	0	0	0	0	0	0	0	0	0	0	0	0	0	0	0	0	0	0	0	0	0	0	0	0	0	6	0	0	0	0	0	0
chr11:66974980-66985355	66974980	66985355	0	0	0	0	0	0	0	0	0	0	0	0	0	0	0	0	0	0	0	0	0	0	0	0	0	0	0	0	0	0	0	0	0	0	3	0	0	0	0	0
chr11:66974980-66999431	66974980	66999431	0	0	0	0	0	0	0	0	0	0	0	0	0	0	0	0	0	0	0	0	0	0	0	0	1	0	0	0	0	0	0	0	0	3	0	2	0	4	0	0
chr11:66982810-66999431	66982810	66999431	0	0	0	0	0	0	0	0	0	0	0	0	0	0	0	0	0	0	0	0	0	0	0	0	0	0	0	0	0	3	0	0	0	0	0	0	0	0	0	0
chr11:66995507-66999431	66995507	66999431	0	0	0	0	0	0	0	0	0	0	0	0	0	0	0	0	0	0	0	0	0	0	0	0	0	0	0	0	0	0	15	0	0	0	3	0	0	0	0	0
chr11:66999036-67013587	66999036	67013587	0	0	0	0	0	0	0	0	0	0	0	0	0	0	0	0	0	0	0	0	0	0	0	0	0	0	0	0	0	0	0	0	0	0	3	0	0	0	0	0
chr11:67012659-67013587	67012659	67013587	0	0	0	0	0	0	0	0	0	0	0	0	0	0	0	0	0	0	0	0	0	0	0	0	0	0	0	0	0	0	0	0	0	0	0	3	0	0	0	0
chr11:67046670-67050699	67046670	67050699	0	0	0	0	0	0	0	0	0	0	0	0	0	0	0	0	0	0	0	0	0	0	0	0	0	0	0	0	2	0	0	0	0	0	0	0	0	0	0	0
chr11:67837655-67838324	67837655	67838324	0	0	0	0	0	0	0	0	0	0	0	0	0	0	0	0	0	0	0	0	0	0	0	0	0	0	0	0	0	0	0	0	0	0	3	0	0	0	0	0
chr11:67934448-67957619	67934448	67957619	0	0	1	0	0	0	0	0	0	0	0	1	0	1	0	0	1	0	0	0	0	2	0	0	1	0	0	0	0	0	0	0	0	0	0	0	0	0	0	0
chr11:67938481-67939176	67938481	67939176	0	0	0	0	0	0	0	0	0	0	0	0	0	0	0	0	0	0	0	0	1	0	0	0	0	0	0	0	0	0	0	0	0	0	0	0	0	0	2	0
chr11:67938481-67942650	67938481	67942650	0	0	0	0	0	0	0	0	0	0	0	0	0	0	0	0	0	0	0	0	0	0	0	0	0	0	0	0	0	0	3	0	0	3	1	0	0	0	0	0
chr11:67938481-67947667	67938481	67947667	0	0	0	0	0	0	0	0	0	0	0	0	0	0	0	0	0	0	0	0	0	0	0	0	0	0	0	0	0	0	0	0	2	0	0	0	0	0	0	0
chr11:67942484-67947667	67942484	67947667	0	0	0	0	0	0	0	0	0	0	0	0	0	0	0	0	0	0	0	0	0	0	0	0	0	0	0	0	0	0	0	0	0	0	0	0	0	0	4	0
chr11:67953247-67957619	67953247	67957619	0	1	0	0	0	0	0	0	0	0	0	0	0	0	0	0	0	0	0	0	0	0	0	0	0	0	0	0	7	0	0	0	5	2	3	1	4	0	2	5
chr11:67957383-67957619	67957383	67957619	0	0	0	0	0	0	0	0	0	0	0	0	0	0	0	0	0	0	0	0	0	0	0	0	0	0	0	0	0	0	0	0	2	0	1	1	0	0	4	0
chr11:68115314-68125315	68115314	68125315	0	0	0	0	0	0	0	0	0	0	0	0	0	0	0	0	0	0	0	0	0	0	0	0	0	0	0	0	0	0	0	0	0	2	0	0	0	0	0	0
chr11:68272612-68305359	68272612	68305359	0	1	1	0	0	0	1	0	0	0	0	0	1	1	0	0	0	0	0	0	0	0	0	0	0	0	0	0	0	0	0	0	0	6	0	1	0	1	0	0
chr11:68272612-68312492	68272612	68312492	0	0	0	0	0	0	0	0	0	0	0	0	0	0	0	0	0	0	0	0	0	0	0	0	0	0	0	0	0	0	0	0	0	1	4	0	0	0	0	0
chr11:68272612-68321725	68272612	68321725	0	0	0	0	0	0	0	0	0	0	0	0	0	0	0	0	0	0	0	0	0	0	0	0	0	2	0	0	0	0	0	0	0	2	0	0	0	0	0	0
chr11:68272612-68331900	68272612	68331900	0	0	0	0	0	0	0	0	0	0	0	0	0	0	0	0	0	0	0	0	0	0	0	0	0	0	0	0	2	0	0	0	0	0	0	1	0	0	0	0
chr11:68272612-68338572	68272612	68338572	0	0	0	0	0	0	0	0	0	0	0	0	0	0	0	0	0	0	0	0	0	0	0	0	0	1	0	0	0	0	0	0	0	0	0	2	0	0	0	0
chr11:68272612-68341692	68272612	68341692	0	0	0	0	0	0	0	0	0	0	0	0	0	0	0	0	0	0	0	0	0	0	0	0	0	0	0	0	0	0	0	0	0	0	0	2	0	0	0	0
chr11:68286968-68305359	68286968	68305359	0	0	0	0	0	0	0	0	0	0	0	0	0	0	1	0	0	0	0	0	0	0	0	0	0	0	0	0	0	0	0	0	0	5	0	0	0	0	1	0
chr11:68286968-68312492	68286968	68312492	0	1	0	0	0	0	0	0	0	0	0	0	0	0	0	0	0	0	0	0	0	0	0	0	0	0	0	0	0	0	0	2	0	2	0	5	0	0	0	0
chr11:68286968-68315672	68286968	68315672	0	0	0	0	0	0	0	0	0	0	0	0	0	0	0	0	0	0	0	0	0	0	0	0	0	0	0	0	0	0	0	0	0	0	0	0	4	0	0	0
chr11:68286968-68318654	68286968	68318654	0	0	0	0	0	0	0	0	0	0	1	0	0	0	0	0	0	0	0	0	0	0	1	0	0	1	0	0	0	0	0	0	7	3	0	0	0	0	0	0
chr11:68286968-68326147	68286968	68326147	0	0	0	0	0	0	0	0	0	0	0	0	0	0	0	0	0	0	0	0	0	1	0	0	1	0	0	0	0	0	0	0	0	0	3	1	1	0	0	0
chr11:68286968-68331900	68286968	68331900	0	0	0	0	0	0	0	0	0	0	0	0	0	0	0	0	0	0	0	0	0	0	0	1	0	0	0	0	0	0	0	1	0	0	2	0	0	0	0	0
chr11:68286968-68350597	68286968	68350597	0	0	0	0	0	0	0	0	0	0	0	0	0	0	0	0	0	0	0	0	0	0	0	0	0	0	0	0	0	2	0	0	0	0	0	0	0	0	0	0
chr11:68305126-68326147	68305126	68326147	0	0	0	0	0	0	0	0	0	0	0	0	0	0	0	0	0	0	0	0	0	0	0	0	0	0	0	0	0	0	0	0	0	4	0	0	5	0	0	0
chr11:68312305-68326147	68312305	68326147	0	0	0	0	0	0	0	0	0	0	0	0	0	0	0	0	0	0	0	0	0	0	0	0	0	0	0	0	0	0	0	0	0	0	2	0	0	0	0	0
chr11:68312305-68331900	68312305	68331900	0	0	0	0	0	2	0	0	0	0	0	0	0	0	0	0	0	1	0	0	0	0	0	0	0	0	0	0	0	0	0	0	0	0	0	0	0	0	0	0
chr11:68312305-68338572	136624610	136677144	0	0	0	0	0	0	0	0	0	0	0	0	0	0	0	0	0	0	0	0	0	0	0	0	3	1	0	0	0	0	0	0	0	0	0	0	0	0	0	0
chr11:68315534-68326147	68315534	68326147	0	0	0	0	0	0	0	0	0	0	0	0	0	0	0	0	0	0	0	0	0	0	0	0	0	0	0	0	0	0	0	0	0	0	0	2	0	0	0	0
chr11:68315534-68338572	68315534	68338572	0	0	0	0	0	0	0	0	0	0	0	0	0	0	0	1	0	1	0	0	0	2	0	0	0	0	0	0	0	0	0	0	4	3	0	0	0	1	0	0
chr11:68315534-68343511	68315534	68343511	0	0	0	0	0	0	0	0	0	0	0	0	0	0	0	0	0	0	0	0	0	0	0	0	0	0	0	0	1	0	0	0	0	0	3	0	0	0	0	0
chr11:68318588-68326147	68318588	68326147	0	0	0	0	0	0	0	0	0	0	0	0	0	0	0	0	0	0	0	0	0	0	0	0	0	0	0	0	0	0	0	8	0	0	0	0	0	0	0	0
chr11:68318588-68331900	68318588	68331900	0	0	1	1	1	0	0	0	0	0	0	0	0	0	0	0	0	1	0	2	4	2	1	0	0	3	0	1	2	2	2	0	1	18	5	5	3	1	10	0
chr11:68318588-68338572	68318588	68338572	0	0	0	0	0	0	0	0	0	0	0	0	0	0	0	0	0	0	0	0	0	0	0	0	0	0	1	0	0	3	0	0	0	0	0	0	0	0	0	0
chr11:68326033-68343511	68326033	68343511	0	0	0	0	0	0	0	0	0	0	0	0	0	0	0	0	0	0	0	0	0	0	0	0	0	0	0	1	0	0	0	0	6	0	0	0	0	0	0	0
chr11:68326033-68350597	68326033	68350597	0	0	0	0	0	0	0	0	0	0	0	0	0	0	0	0	0	0	0	0	0	0	0	0	0	0	0	0	0	0	0	0	0	4	0	0	0	0	0	0
chr11:68326033-68363686	68326033	68363686	0	0	0	0	0	0	0	0	1	0	0	0	0	0	0	0	0	0	0	0	2	1	0	0	0	0	0	0	0	0	0	0	0	0	0	0	0	0	0	0
chr11:68331770-68343511	68331770	68343511	0	0	0	0	0	0	0	0	0	0	0	0	0	0	0	0	0	0	0	0	0	0	0	0	0	0	0	0	0	0	0	0	0	3	0	0	0	0	0	0
chr11:68334481-68338572	68334481	68338572	0	0	0	0	1	0	0	0	0	0	0	0	0	0	0	0	0	0	0	0	0	0	0	0	0	0	0	0	0	0	0	0	0	5	0	1	0	0	0	0
chr11:68334481-68343511	136668962	136687022	0	1	0	0	0	0	0	0	1	2	0	0	1	0	0	0	1	1	0	1	2	0	1	0	2	1	0	0	4	4	0	0	8	6	3	1	0	0	5	0
chr11:68334481-68350597	68334481	68350597	0	1	0	0	0	0	0	0	0	0	0	0	0	0	0	0	0	0	0	0	0	2	0	0	0	0	0	0	0	0	0	0	4	3	0	2	0	0	0	0
chr11:68334481-68355492	68334481	68355492	0	0	0	0	0	0	0	0	0	0	0	0	0	0	0	0	0	0	0	0	0	0	0	0	0	0	0	0	0	0	0	0	2	0	0	0	0	0	0	0
chr11:68334481-68363686	68334481	68363686	0	0	0	1	0	0	0	0	0	2	0	0	0	0	0	1	0	1	2	0	1	1	0	0	1	0	0	0	5	2	0	0	0	5	6	4	5	2	0	7
chr11:68337215-68343511	68337215	68343511	0	0	0	0	0	0	0	0	0	0	0	0	0	0	0	1	0	0	0	0	0	0	0	0	0	0	0	2	0	0	0	0	0	1	0	2	0	0	0	0
chr11:68337215-68363686	136674430	136727372	0	0	0	0	0	0	0	0	0	1	0	0	0	0	1	0	1	0	0	0	1	1	0	0	0	2	0	3	0	2	0	0	1	11	3	2	0	0	0	0
chr11:68341576-68355492	68341576	68355492	0	0	0	0	0	0	0	0	0	0	0	0	0	0	0	0	0	0	0	0	0	0	0	0	0	0	0	0	0	0	0	0	0	0	0	0	0	0	5	0
chr11:68341576-68363686	68341576	68363686	0	0	0	0	0	0	0	0	0	0	0	0	0	0	0	0	0	0	0	0	0	0	0	0	0	0	0	0	1	0	0	0	0	3	0	0	0	0	0	0
chr11:68350510-68363686	68350510	68363686	0	0	0	0	0	1	0	0	0	0	0	0	1	0	0	0	0	1	0	0	0	0	0	0	2	2	0	0	0	0	0	0	1	1	1	3	0	0	0	0
chr11:68355445-68363686	68355445	68363686	0	0	0	0	0	0	0	0	0	0	0	0	0	0	0	0	0	0	0	0	0	0	0	0	0	0	0	0	0	0	0	0	4	0	0	0	0	0	0	0
chr11:68358127-68370960	68358127	68370960	0	0	0	1	0	0	0	0	0	0	0	0	0	0	0	0	0	0	0	0	0	0	0	0	0	0	0	0	0	2	0	0	0	0	0	0	0	0	0	0
chr11:68359043-68367962	68359043	68367962	0	0	1	0	0	0	0	0	0	0	0	0	1	0	0	0	0	0	0	0	0	0	1	0	0	0	0	1	2	0	0	0	0	5	1	8	1	0	0	0
chr11:68363564-68370960	68363564	68370960	1	1	1	0	0	0	0	0	0	0	0	0	0	0	0	0	0	0	0	0	0	0	0	0	0	2	0	0	0	0	0	0	0	8	0	0	0	0	0	0
chr11:68369330-68370960	68369330	68370960	0	0	0	0	0	0	0	0	0	0	0	1	0	0	0	0	0	0	0	0	0	0	0	0	1	1	4	2	0	1	0	0	0	6	6	3	0	0	0	0
chr11:68527036-68540897	68527036	68540897	0	0	0	0	0	0	0	0	0	0	0	0	0	0	0	0	0	0	0	0	0	0	0	0	0	0	0	0	0	0	0	0	0	2	0	0	0	0	0	0
chr11:68527036-68548213	68527036	68548213	0	0	0	0	0	0	0	0	0	0	0	0	0	0	0	0	0	0	0	0	0	0	0	0	0	0	0	0	0	2	0	0	0	0	0	0	0	0	0	0
chr11:68560782-68564401	68560782	68564401	0	0	0	0	0	0	0	0	0	0	0	0	0	0	0	0	0	0	0	0	0	0	0	0	0	0	0	0	2	0	0	0	0	0	0	0	0	0	0	0
chr11:68562271-68580044	68562271	68580044	0	0	0	0	0	0	0	0	0	0	0	0	0	0	0	0	0	0	0	0	0	0	0	0	0	0	0	0	0	0	0	0	0	2	0	0	0	0	0	0
chr11:6962801-6977013	6962801	6977013	2	1	0	0	0	1	0	0	0	0	0	0	0	0	0	0	0	0	0	0	1	0	0	0	0	1	0	0	0	1	0	0	2	0	0	3	0	1	0	0
chr11:70176278-70181800	70176278	70181800	0	0	0	0	0	0	1	0	0	0	0	0	0	0	0	0	0	0	0	0	0	0	0	0	1	0	0	1	0	0	0	6	0	0	0	2	0	0	4	0
chr11:70183470-70185412	70183470	70185412	0	0	0	0	0	0	0	0	0	0	0	0	0	0	0	0	0	0	0	0	0	0	0	0	0	0	0	0	0	0	0	0	0	0	2	0	0	0	0	0
chr11:70196028-70202360	70196028	70202360	0	0	0	0	0	0	0	1	0	0	0	0	0	0	1	0	0	0	0	0	0	1	0	1	0	0	0	0	0	0	0	0	0	0	0	2	0	0	0	0
chr11:70200406-70202360	140400812	140404720	0	2	3	0	2	3	2	0	0	0	3	1	1	1	0	0	0	1	1	3	0	0	0	0	2	0	0	1	4	0	0	0	0	0	1	4	0	11	0	0
chr11:70208200-70222706	70208200	70222706	0	0	0	0	0	0	0	0	0	0	0	0	0	0	0	0	0	0	0	0	0	0	0	0	0	0	0	0	0	0	0	2	0	0	0	1	0	0	0	0
chr11:71693806-71701763	71693806	71701763	0	0	1	2	0	0	0	0	0	0	0	0	0	0	0	0	0	0	0	0	0	0	0	0	0	0	0	0	0	0	0	0	0	0	0	0	0	0	0	0
chr11:72695132-72700142	72695132	72700142	1	0	0	3	0	0	0	0	0	0	0	0	0	1	0	0	0	1	1	0	0	0	0	2	0	2	1	0	0	0	0	0	4	0	0	0	0	0	0	0
chr11:72695132-72712179	72695132	72712179	0	0	0	0	0	0	0	0	0	0	0	0	0	0	0	0	0	0	0	0	0	0	0	0	0	0	0	0	0	0	0	0	0	0	0	1	0	0	5	0
chr11:72695132-72726930	72695132	72726930	0	0	0	0	0	0	0	0	0	0	0	0	0	0	0	0	0	0	0	0	0	0	0	0	0	0	0	0	0	1	0	0	0	0	4	0	0	0	0	0
chr11:73418464-73429763	146836928	146859526	1	0	0	2	0	0	1	0	1	0	0	0	0	1	0	0	0	1	2	2	0	0	1	2	0	2	0	1	3	6	0	5	0	10	13	10	0	0	1	0
chr11:73418464-73429935	146836928	146859870	0	2	0	0	0	0	0	0	1	0	0	0	1	0	0	1	0	1	0	2	1	0	0	0	0	1	0	0	0	0	0	0	4	0	0	3	0	0	0	0
chr11:73418464-73431944	73418464	73431944	1	0	0	1	0	0	0	0	0	2	0	0	0	0	0	1	0	0	0	0	0	0	0	0	0	0	0	1	0	0	0	0	8	3	2	0	0	0	0	0
chr11:73795925-73809300	73795925	73809300	0	0	0	0	0	0	0	0	0	0	0	0	0	0	0	0	0	0	0	0	0	0	0	0	0	0	0	0	0	6	0	0	0	0	0	0	0	0	0	0
chr11:73801857-73820197	73801857	73820197	0	0	0	0	0	0	0	0	0	0	0	0	0	0	0	0	0	0	0	0	0	0	0	0	0	0	0	0	0	0	0	6	0	0	0	0	0	0	0	0
chr11:73803460-73817538	73803460	73817538	0	0	0	0	0	0	0	0	0	0	0	0	0	0	0	0	0	0	0	0	0	0	0	0	0	0	0	0	0	0	0	0	0	0	3	0	0	0	0	0
chr11:73829272-73834180	73829272	73834180	0	1	0	0	0	0	0	0	0	0	0	1	0	0	0	0	0	0	1	0	0	0	0	0	0	0	0	0	2	0	0	0	0	0	4	0	0	0	0	0
chr11:73829272-73844602	73829272	73844602	1	0	0	0	0	0	0	0	0	0	0	0	0	0	0	0	0	0	0	0	0	0	0	0	0	1	0	1	0	0	0	0	0	0	0	1	0	0	2	0
chr11:73843888-73844602	73843888	73844602	0	0	0	0	0	0	0	0	0	0	0	0	0	0	0	0	1	0	1	0	2	1	0	0	0	0	0	0	0	0	0	0	0	3	0	0	0	0	0	0
chr11:73843888-73850873	73843888	73850873	0	0	0	0	0	0	0	0	0	0	0	0	0	0	0	0	0	0	1	0	0	0	0	0	0	0	0	0	0	0	0	0	1	0	3	0	0	0	0	0
chr11:73849764-73850873	73849764	73850873	0	0	0	0	0	0	0	0	0	0	0	0	0	0	0	0	0	0	0	0	0	0	0	0	0	0	0	0	0	0	0	0	2	0	1	1	0	0	0	0
chr11:73879388-73879658	73879388	73879658	0	0	0	0	0	0	0	0	0	0	0	0	0	0	0	0	0	0	0	0	0	0	0	0	0	0	0	0	0	0	0	0	0	0	0	3	0	0	0	0
chr11:73914772-73915490	73914772	73915490	1	0	0	0	0	0	0	0	0	1	0	0	0	0	0	0	0	0	0	0	0	0	0	0	0	0	0	0	3	1	0	0	0	0	0	0	0	0	0	0
chr11:73936249-73950301	147872498	147900602	0	0	0	1	0	0	0	0	0	0	0	0	0	0	0	0	0	1	0	0	0	0	1	0	0	0	0	0	2	1	0	9	0	0	0	2	5	0	0	0
chr11:73946945-73950301	73946945	73950301	0	0	0	0	0	0	0	0	0	0	0	0	0	0	0	0	0	0	0	0	0	0	0	0	0	0	0	0	3	0	0	0	0	0	0	0	0	0	0	0
chr11:73950177-73958168	73950177	73958168	0	0	0	0	0	0	0	0	0	0	0	0	0	0	0	0	0	0	0	1	0	0	0	0	0	0	0	0	0	2	0	0	0	1	0	1	0	0	0	0
chr11:73984589-73997436	73984589	73997436	0	0	0	0	0	0	0	0	0	0	0	0	0	0	0	0	0	0	0	0	0	0	0	0	0	0	0	0	0	0	0	0	0	0	0	0	3	0	0	0
chr11:74315736-74331134	74315736	74331134	0	0	0	0	0	1	0	0	0	0	1	0	0	0	0	0	0	0	0	0	0	0	0	0	1	0	0	0	0	0	0	0	0	5	0	0	0	0	0	0
chr11:74323922-74329849	74323922	74329849	0	0	0	0	0	0	0	0	0	0	0	0	0	0	0	0	0	0	0	0	0	0	0	0	0	0	0	0	0	0	0	0	0	0	3	0	0	0	0	0
chr11:74500670-74528759	74500670	74528759	1	1	0	0	0	0	1	1	0	0	0	0	1	0	0	0	0	0	0	0	1	0	1	1	0	1	0	0	1	0	0	0	7	5	11	3	1	0	8	4
chr11:74554394-74556316	74554394	74556316	0	0	0	0	0	0	0	0	0	0	0	0	0	0	0	0	0	0	0	0	0	0	0	0	0	0	0	0	0	0	0	0	2	0	0	0	0	0	0	0
chr11:74570202-74574066	74570202	74574066	1	0	0	0	0	0	0	1	0	0	0	0	0	0	0	0	1	0	0	0	0	0	0	0	0	0	0	0	0	0	0	0	0	0	0	0	4	0	0	0
chr11:75572790-75694557	75572790	75694557	0	0	0	0	0	0	0	0	0	0	0	0	0	2	0	0	0	0	0	0	0	0	0	0	0	0	0	0	0	0	0	0	0	0	0	0	0	0	0	0
chr11:75572790-75776832	75572790	75776832	0	0	0	0	0	0	0	0	0	0	0	0	0	0	0	0	0	0	0	0	0	0	0	0	0	0	0	0	0	2	0	0	0	0	0	0	0	0	0	0
chr11:755878-760253	755878	760253	0	0	0	0	0	0	0	0	0	0	0	0	0	0	0	0	0	0	0	0	0	1	0	0	2	0	0	0	3	0	0	0	2	7	0	5	0	0	0	9
chr11:75590922-75599947	75590922	75599947	0	0	0	0	0	0	0	0	0	0	0	0	0	0	0	0	0	0	0	0	0	0	0	0	0	0	0	0	0	0	0	0	4	0	0	0	0	0	0	0
chr11:75590922-75672593	75590922	75672593	0	0	0	0	0	0	0	0	0	0	0	0	0	0	0	0	0	0	0	0	0	0	0	0	0	0	0	0	0	0	0	0	0	0	6	0	0	0	0	0
chr11:75590922-75728024	75590922	75728024	0	0	0	0	0	0	0	0	0	0	0	0	0	0	0	0	0	0	0	0	0	0	0	0	0	0	0	0	0	0	0	3	2	0	0	0	0	0	0	0
chr11:75622997-75672593	75622997	75672593	0	0	0	0	0	0	0	0	0	0	0	0	0	0	0	0	0	0	0	0	0	0	0	0	0	0	0	0	0	0	0	0	0	6	0	0	0	0	0	0
chr11:76075381-76077016	76075381	76077016	0	0	0	0	0	0	0	0	0	0	0	0	0	0	0	0	0	0	0	0	0	0	0	0	0	2	0	0	0	0	0	0	0	0	0	0	0	0	0	0
chr11:76162901-76171129	76162901	76171129	0	0	0	0	0	0	0	0	0	0	0	0	0	0	0	0	0	0	0	0	0	0	0	0	0	0	0	0	0	0	0	0	0	3	0	0	0	0	0	0
chr11:76162901-76183884	76162901	76183884	0	0	0	0	0	0	0	0	0	0	0	0	0	0	0	1	0	0	0	0	0	0	0	0	0	0	0	0	1	0	0	2	0	2	2	0	0	0	0	0
chr11:76174864-76183884	76174864	76183884	0	1	1	0	0	0	0	0	1	1	0	2	0	1	0	0	1	0	2	0	2	2	0	0	1	1	3	2	5	0	0	0	8	8	16	7	5	9	6	7
chr11:76174864-76227356	76174864	76227356	0	0	0	0	0	0	0	0	0	0	0	0	0	0	0	0	0	0	0	0	0	0	0	0	0	0	0	0	0	0	0	0	0	0	0	0	3	0	0	0
chr11:76174864-76239510	76174864	76239510	0	0	0	0	0	0	0	0	0	0	0	0	0	0	0	0	0	0	0	0	0	0	0	0	0	0	0	0	0	0	0	0	0	2	0	0	0	0	0	0
chr11:76207258-76227356	76207258	76227356	0	0	0	0	0	0	0	0	0	0	0	0	0	0	0	0	0	0	0	0	0	0	0	0	0	0	2	0	1	0	0	0	0	0	2	0	0	0	0	0
chr11:76207258-76234335	76207258	76234335	0	0	0	0	0	0	1	0	0	0	0	0	0	0	0	0	0	0	0	0	0	0	1	0	0	0	0	0	0	0	0	0	0	2	0	1	0	0	0	0
chr11:76207258-76239510	76207258	76239510	0	0	0	0	0	0	0	0	0	0	0	0	0	0	0	0	0	0	1	0	0	0	2	0	0	0	0	0	0	0	0	0	1	0	0	0	2	0	4	0
chr11:76207258-76257341	76207258	76257341	0	0	0	0	0	0	0	0	0	0	0	0	0	0	0	0	0	0	0	0	0	0	0	0	0	0	0	0	0	0	0	0	0	0	3	0	0	0	0	0
chr11:76224429-76227356	76224429	76227356	0	0	0	0	0	0	0	0	0	0	0	0	0	0	0	0	0	0	0	0	0	0	0	0	0	0	0	0	0	0	0	0	0	3	0	0	0	0	0	0
chr11:76224429-76234335	76224429	76234335	0	0	0	0	0	0	0	0	0	0	0	0	0	0	0	0	0	0	0	0	0	0	0	0	0	0	1	0	0	0	0	0	0	3	0	1	4	0	0	0
chr11:76224429-76239510	76224429	76239510	0	0	0	0	0	0	0	0	0	0	0	0	0	0	1	0	1	0	0	0	0	0	0	0	0	0	3	0	0	3	0	0	0	1	10	6	4	0	0	5
chr11:76234198-76239510	76234198	76239510	0	0	0	0	0	0	0	0	0	0	0	0	0	0	0	0	0	0	0	0	0	0	0	0	0	0	0	0	0	0	0	0	0	1	0	3	0	0	0	0
chr11:76234198-76248994	76234198	76248994	0	0	0	0	0	0	0	0	0	0	0	0	0	0	0	0	0	0	0	0	0	0	0	0	0	0	0	0	0	0	0	0	0	0	0	0	0	0	3	0
chr11:76237505-76239510	76237505	76239510	0	0	0	0	0	0	0	0	0	0	0	0	0	0	0	0	0	0	0	0	0	1	0	0	0	0	0	0	0	0	0	0	3	0	0	6	6	0	0	0
chr11:76248838-76253411	76248838	76253411	0	0	0	0	0	0	0	0	0	0	0	0	0	0	0	0	0	0	0	0	0	0	0	0	0	0	0	0	0	0	0	0	0	0	0	2	0	0	0	0
chr11:76696686-76709865	76696686	76709865	0	0	0	0	0	0	0	0	0	0	0	0	0	0	0	0	0	0	0	0	0	0	0	0	0	0	0	0	1	3	0	0	0	0	3	0	0	0	0	0
chr11:77051690-77070062	77051690	77070062	0	0	0	0	0	0	0	0	0	0	0	0	0	0	0	0	0	0	0	0	0	0	0	0	0	0	0	0	0	0	0	0	0	0	0	2	0	0	0	0
chr11:77051690-77091039	77051690	77091039	0	0	0	0	0	0	0	0	0	0	0	0	0	0	0	0	0	0	0	0	0	0	0	0	0	0	0	0	0	0	0	0	0	0	3	0	0	0	0	0
chr11:77060283-77070062	77060283	77070062	0	0	0	0	0	0	0	0	0	0	0	0	0	0	0	0	0	0	0	0	0	0	0	0	0	0	0	0	0	0	0	0	0	2	0	0	0	0	0	0
chr11:77064580-77085410	77064580	77085410	0	0	0	0	0	0	0	0	0	0	0	0	0	0	0	0	0	0	0	0	0	0	0	0	2	0	0	0	1	0	0	0	0	0	0	0	0	0	0	0
chr11:77085372-77103586	77085372	77103586	0	0	0	0	0	0	0	0	0	0	0	0	1	0	0	0	0	0	0	0	0	0	0	0	0	0	0	0	0	0	0	0	0	0	0	2	0	0	0	0
chr11:77090285-77091039	77090285	77091039	2	1	0	1	0	0	0	0	0	0	0	0	0	2	0	0	0	1	0	0	0	0	0	0	2	0	0	0	0	0	0	0	0	0	0	0	0	0	0	0
chr11:77103375-77103586	77103375	77103586	0	0	0	0	0	0	0	0	0	0	0	0	0	0	0	0	0	2	0	0	0	0	0	0	0	0	0	0	0	0	0	0	0	0	0	0	0	0	0	0
chr11:77330650-77336863	77330650	77336863	1	3	4	1	0	0	0	1	0	0	1	0	0	0	0	2	0	1	0	1	0	0	1	1	0	0	0	0	1	2	0	0	0	3	14	5	4	1	4	0
chr11:77330650-77340944	77330650	77340944	0	0	1	0	0	0	0	0	1	0	0	0	1	0	0	0	0	0	1	0	0	1	0	0	1	1	0	0	3	3	0	0	0	0	2	0	0	0	0	0
chr11:77333544-77336863	77333544	77336863	0	1	0	0	0	0	0	0	0	0	0	0	0	1	0	0	0	0	0	0	0	0	0	0	0	0	0	0	0	0	0	0	0	2	0	0	0	0	0	0
chr11:77333544-77340944	154667088	154681888	0	0	0	0	0	0	0	0	0	0	0	0	0	0	0	0	0	0	0	0	0	0	0	0	0	0	0	0	0	0	0	0	0	0	0	4	0	0	0	0
chr11:77336007-77336863	77336007	77336863	1	1	3	0	0	0	0	1	0	0	0	0	0	0	0	1	0	0	0	2	0	0	1	4	1	0	0	3	0	0	0	4	0	0	0	2	0	0	6	0
chr11:77336007-77340944	77336007	77340944	0	0	0	0	0	0	0	0	0	1	0	0	1	1	0	0	1	0	0	0	0	0	1	0	0	1	0	0	0	0	0	2	0	4	0	0	0	0	0	0
chr11:77383086-77389198	77383086	77389198	0	0	0	0	0	0	0	0	0	0	0	0	0	0	0	0	0	0	0	0	0	0	0	0	0	0	0	0	0	0	0	0	0	0	3	0	0	0	3	0
chr11:77383086-77404656	77383086	77404656	1	0	0	0	0	0	0	1	0	0	0	0	0	0	0	0	1	0	0	0	1	0	0	0	1	1	0	0	0	0	0	0	0	0	0	2	0	0	0	0
chr11:77386080-77389198	77386080	77389198	0	0	0	0	0	0	0	0	0	0	0	0	0	0	0	0	0	0	0	0	0	0	0	0	4	0	0	0	2	5	0	9	0	0	8	1	2	0	0	0
chr11:77386080-77394864	77386080	77394864	0	0	0	0	0	0	0	0	0	0	0	0	0	0	0	0	0	0	0	0	0	0	0	0	0	0	0	0	3	0	0	0	0	0	0	0	0	0	0	0
chr11:77386080-77402283	77386080	77402283	0	0	0	0	0	0	0	0	0	0	0	0	0	0	0	0	0	0	0	0	0	0	0	0	0	0	0	0	0	0	0	0	0	0	0	0	2	0	0	0
chr11:77386080-77404656	77386080	77404656	0	0	1	0	0	0	1	0	0	0	0	0	0	0	0	1	0	2	0	0	2	1	1	0	1	0	0	2	4	5	0	0	8	3	0	7	5	0	0	0
chr11:77389130-77413540	77389130	77413540	0	0	0	0	0	0	0	0	0	0	0	0	0	0	0	0	0	0	0	0	0	1	0	0	0	0	0	0	0	0	0	0	0	0	0	3	0	0	0	0
chr11:77394754-77404656	154789508	154809312	0	1	0	0	0	1	1	0	1	4	1	0	0	0	1	1	1	2	0	0	0	1	3	2	0	1	0	1	0	7	0	12	6	4	10	13	3	0	0	0
chr11:77396149-77404656	77396149	77404656	0	0	0	0	1	1	0	0	0	0	0	0	0	1	0	2	0	0	0	0	0	0	0	0	0	0	0	2	0	0	6	0	0	2	0	1	0	0	0	0
chr11:77402203-77404656	77402203	77404656	0	0	0	0	0	0	0	0	0	0	0	2	0	0	0	0	0	0	0	0	0	0	0	0	0	0	0	0	2	0	0	0	0	0	0	0	0	0	0	0
chr11:77402203-77413540	154804406	154827080	0	0	0	0	0	0	0	0	0	0	0	0	0	0	0	0	0	0	1	1	0	0	0	0	0	1	0	0	2	1	0	0	0	0	0	0	0	0	0	0
chr11:77404551-77413540	77404551	77413540	1	0	0	0	0	0	1	0	0	0	0	0	0	0	0	0	0	0	0	1	1	1	0	0	0	0	1	1	0	2	0	0	0	0	4	1	0	0	0	0
chr11:77409531-77413540	154819062	154827080	0	2	0	0	2	0	0	0	0	0	1	1	1	0	0	1	2	1	0	3	0	2	0	1	0	4	0	3	4	3	12	3	12	17	16	2	4	2	15	0
chr11:77436589-77475734	77436589	77475734	0	0	0	0	0	0	0	0	0	0	0	0	0	0	0	0	0	0	0	0	1	0	0	0	0	0	0	0	0	0	0	0	3	0	0	1	1	0	3	0
chr11:77451775-77475734	77451775	77475734	0	0	0	0	0	0	0	0	0	0	0	0	0	0	0	0	0	1	0	0	0	0	0	0	0	1	0	0	0	4	0	2	4	7	3	0	1	0	0	0
chr11:77605335-77630024	77605335	77630024	0	0	0	0	0	0	0	0	0	0	0	0	0	0	0	0	0	0	0	0	0	0	0	0	2	0	0	0	0	0	0	0	0	0	0	0	0	0	0	0
chr11:77690041-77702345	77690041	77702345	0	0	0	0	0	0	0	0	0	0	0	0	0	0	0	0	0	0	0	0	0	0	0	0	0	0	0	0	0	0	0	0	0	7	0	0	0	0	0	0
chr11:78204108-78282489	78204108	78282489	0	0	0	0	0	0	0	0	0	0	0	0	0	0	0	0	0	0	0	0	0	0	0	0	0	0	0	0	0	0	0	0	3	0	0	0	0	0	0	0
chr11:78279677-78282489	78279677	78282489	0	0	0	0	0	0	0	0	0	0	0	0	1	0	0	0	0	0	0	0	0	0	0	0	0	0	0	0	0	0	0	0	0	6	0	0	0	0	0	0
chr11:8148205-8161740	8148205	8161740	0	0	0	0	0	0	0	0	0	0	0	0	0	0	0	0	0	0	0	0	0	0	0	0	0	0	0	0	0	0	0	0	0	0	0	0	0	0	2	0
chr11:8158924-8174970	8158924	8174970	0	0	0	0	0	0	0	0	0	0	0	0	0	1	0	0	0	0	0	0	0	0	0	0	0	0	0	0	0	0	0	0	0	0	0	0	5	0	0	0
chr11:82560090-82571159	82560090	82571159	0	0	0	0	0	0	0	0	0	0	0	0	0	0	0	0	0	0	0	0	0	0	0	0	0	0	0	0	0	3	0	1	0	0	0	0	0	0	0	0
chr11:82872368-82874909	82872368	82874909	0	0	0	0	0	0	0	0	0	0	0	0	0	0	0	0	0	0	0	0	0	0	0	0	0	0	0	0	0	0	0	0	0	4	0	0	0	0	0	0
chr11:82872368-82881037	82872368	82881037	0	0	0	0	0	0	0	0	0	0	0	0	0	0	0	0	0	0	0	0	0	0	0	0	0	0	0	0	0	0	0	0	0	1	0	2	0	0	0	0
chr11:82872368-82882956	82872368	82882956	0	0	0	0	0	0	0	0	0	0	0	0	0	0	0	0	0	0	0	0	0	0	0	0	0	0	0	0	0	0	4	0	0	0	0	0	0	0	0	0
chr11:82872368-82894115	82872368	82894115	0	0	0	0	0	0	0	0	0	0	0	0	0	0	0	0	0	0	0	1	0	0	0	0	0	0	0	0	0	0	0	0	3	0	0	0	0	0	0	0
chr11:82874720-82875443	82874720	82875443	0	1	0	0	0	0	0	0	0	0	0	0	0	0	0	0	0	0	0	0	0	0	0	0	2	2	0	0	1	0	16	0	7	13	0	1	0	0	0	0
chr11:82874720-82882956	82874720	82882956	0	0	0	0	0	0	0	0	0	0	0	0	0	0	0	0	0	0	0	0	0	0	0	0	1	0	0	0	0	0	0	0	0	2	0	0	0	0	0	0
chr11:82874720-82888246	82874720	82888246	0	0	0	0	0	0	0	0	0	0	0	0	0	0	0	0	0	0	0	0	0	0	0	0	0	0	0	0	0	0	0	0	0	4	0	0	0	0	0	0
chr11:82875248-82877756	82875248	82877756	0	0	0	0	0	0	0	0	0	0	0	0	0	0	0	0	0	0	0	0	0	0	0	0	0	0	0	0	2	0	0	0	0	0	0	0	0	0	0	0
chr11:82876641-82877756	82876641	82877756	0	0	0	0	0	0	0	0	0	0	0	0	0	0	0	0	0	0	0	0	0	0	0	0	0	0	1	0	0	0	0	0	0	0	0	0	4	0	2	0
chr11:82876641-82882956	82876641	82882956	0	0	0	0	0	0	0	0	0	0	0	0	0	0	0	0	0	0	0	0	0	0	0	0	1	0	0	0	0	0	0	0	0	2	0	0	0	0	0	0
chr11:82878166-82881037	82878166	82881037	0	0	0	0	0	0	0	0	0	0	0	0	0	0	0	0	0	0	0	0	0	0	0	0	0	0	0	0	0	0	0	0	0	3	0	0	0	0	0	0
chr11:82878166-82894115	82878166	82894115	0	0	0	0	0	0	0	0	0	0	0	0	0	0	0	0	0	0	0	0	0	0	0	0	0	0	0	1	0	5	0	0	0	0	0	0	0	0	0	0
chr11:82882859-82894115	82882859	82894115	0	0	0	0	0	0	0	0	0	0	0	0	0	0	0	0	0	0	0	0	0	0	0	0	0	0	0	0	0	0	11	0	0	0	0	0	0	0	0	0
chr11:82888126-82893533	82888126	82893533	0	0	0	0	0	0	0	0	0	0	0	0	0	0	0	0	0	0	0	0	0	0	0	0	0	0	0	0	0	0	8	0	0	0	0	0	0	0	0	0
chr11:82888126-82894115	82888126	82894115	0	0	0	0	0	0	0	0	0	0	0	0	0	0	0	0	0	0	0	0	0	0	0	0	0	0	0	0	0	0	0	0	0	2	0	0	0	0	0	0
chr11:82892049-82894115	82892049	82894115	0	0	0	0	0	0	0	0	0	0	0	0	0	0	0	0	0	0	0	0	0	0	0	0	0	0	0	0	0	3	0	1	0	1	4	0	0	0	0	0
chr11:82909520-82959129	82909520	82959129	0	0	0	0	0	0	0	0	0	0	0	0	0	0	0	0	0	0	0	0	0	0	0	0	0	0	0	0	0	0	0	0	0	5	1	2	0	0	0	0
chr11:82917099-82922472	82917099	82922472	0	0	0	1	0	0	0	0	0	0	0	0	0	0	0	0	0	0	0	0	0	0	0	0	0	0	0	0	0	0	0	0	0	0	1	3	0	0	0	0
chr11:82917099-82936097	82917099	82936097	0	0	0	0	0	0	0	0	0	0	0	0	0	0	0	0	0	0	0	0	0	0	0	0	0	0	0	0	4	0	0	0	0	0	0	0	0	0	0	0
chr11:82917099-82938914	82917099	82938914	0	1	0	0	1	0	0	0	0	0	0	0	0	0	0	0	0	0	0	0	0	0	0	0	1	0	0	0	0	6	0	0	0	0	0	0	0	0	0	0
chr11:82917099-82947551	82917099	82947551	0	0	0	0	0	0	0	0	0	0	0	0	0	0	0	0	0	0	1	0	0	1	0	0	4	0	1	0	0	0	0	7	0	14	0	2	0	0	6	0
chr11:82917099-82951976	82917099	82951976	0	0	0	0	0	0	0	0	0	0	0	0	0	0	0	0	0	0	0	0	0	0	0	0	2	0	0	0	0	0	0	0	0	0	0	0	0	0	0	0
chr11:82917099-82959129	82917099	82959129	0	0	0	0	0	0	0	0	0	0	0	0	0	0	0	0	0	0	0	1	0	0	0	0	0	0	0	0	2	0	0	0	4	0	0	1	0	0	0	0
chr11:82921341-82936097	82921341	82936097	0	0	0	0	0	0	0	0	0	0	0	0	0	0	0	0	0	0	0	0	0	0	0	0	0	0	0	0	0	0	0	0	5	0	0	0	0	0	0	0
chr11:82921341-82947551	82921341	82947551	0	0	0	0	0	0	0	0	0	0	0	0	0	0	0	0	0	0	0	0	0	0	0	0	0	0	0	0	2	0	0	0	0	0	0	0	0	0	0	0
chr11:82935896-82938914	82935896	82938914	0	0	0	0	0	0	0	0	0	0	0	0	0	0	0	0	0	0	0	0	0	0	0	0	0	1	0	0	1	5	0	2	0	7	0	1	0	0	0	0
chr11:82935896-82947551	82935896	82947551	0	0	0	0	0	0	0	0	0	0	0	0	0	0	0	0	0	0	0	0	0	0	0	0	1	1	1	0	0	2	0	0	2	1	0	1	0	0	0	0
chr11:82935896-82959129	82935896	82959129	0	0	0	0	0	0	0	0	0	0	0	0	0	0	0	0	0	0	0	0	0	0	0	0	1	3	2	1	1	15	5	3	3	31	5	13	12	0	11	0
chr11:82947445-82959129	82947445	82959129	0	0	0	0	0	0	0	0	0	0	0	0	0	0	0	0	0	0	0	0	0	0	0	0	0	0	0	0	0	4	0	0	0	0	0	3	0	0	0	0
chr11:82951800-82959129	82951800	82959129	0	0	0	0	0	0	0	0	0	0	0	0	0	0	0	0	0	0	0	0	0	0	0	0	0	0	0	0	0	0	0	0	0	4	0	1	0	0	0	0
chr11:82976906-82991303	82976906	82991303	0	0	0	0	0	0	0	0	0	0	0	0	0	0	0	0	0	0	0	0	0	0	0	0	0	0	0	0	0	0	0	0	0	0	0	0	2	0	0	0
chr11:82984689-82989872	82984689	82989872	0	0	0	1	0	0	0	0	0	0	0	0	0	0	0	0	0	0	0	0	0	0	0	0	0	0	0	0	0	3	1	0	2	0	0	1	0	0	3	0
chr11:82984689-82991303	82984689	82991303	0	0	0	0	0	0	0	0	0	0	0	0	0	0	0	0	0	0	0	0	0	0	0	0	1	0	0	0	0	0	0	0	0	0	0	0	3	0	0	0
chr11:8474368-8486369	8474368	8486369	0	1	0	0	0	0	0	0	0	0	0	0	0	0	0	0	0	0	0	0	0	0	0	0	0	0	0	0	0	0	5	0	0	0	0	0	0	0	0	0
chr11:85309700-85337797	85309700	85337797	0	1	0	0	0	0	0	0	0	0	0	0	0	0	0	0	0	0	0	0	0	0	0	0	0	0	0	0	0	0	0	0	0	0	4	0	0	0	0	0
chr11:85420373-85422275	85420373	85422275	0	0	0	0	0	0	0	0	0	0	0	0	0	0	0	0	0	0	0	0	0	0	0	0	0	0	0	2	0	0	0	0	0	0	0	0	0	0	0	0
chr11:85444981-85445785	85444981	85445785	0	0	0	0	0	0	0	0	0	0	0	0	0	0	0	0	0	0	0	0	0	0	0	0	0	0	0	0	0	3	0	0	0	0	0	0	0	0	0	0
chr11:85444981-85469157	85444981	85469157	0	0	0	0	0	0	0	0	0	0	0	0	0	0	0	0	0	0	0	0	0	0	0	0	0	0	0	0	0	3	0	0	0	0	0	0	0	0	0	0
chr11:85459314-85469157	85459314	85469157	0	0	0	0	0	0	0	0	0	0	0	0	0	0	0	0	0	0	0	0	0	0	0	0	0	0	0	0	0	0	0	0	0	0	0	0	0	0	2	0
chr11:85685750-85687725	85685750	85687725	0	1	0	0	0	0	0	0	0	0	0	0	0	0	0	0	0	0	0	0	0	0	0	0	0	0	0	0	0	0	0	0	0	0	0	2	0	0	0	0
chr11:85685750-85692271	85685750	85692271	0	0	0	0	0	0	0	0	0	0	1	1	0	0	0	0	0	0	0	1	0	1	0	0	0	0	0	0	0	0	0	0	0	1	0	7	0	0	0	0
chr11:85685750-85693046	85685750	85693046	1	0	0	0	0	0	0	0	0	0	0	0	0	0	0	0	0	0	0	0	0	0	0	0	0	0	1	0	0	0	0	0	0	0	1	1	0	0	2	0
chr11:85685750-85695016	171371500	171390032	1	0	2	2	0	1	1	0	4	1	0	2	2	1	2	3	2	3	0	2	3	0	2	1	0	1	0	0	0	7	0	0	7	7	15	6	0	10	13	0
chr11:85685750-85711822	85685750	85711822	0	0	0	0	0	0	0	0	0	0	0	0	0	0	0	0	0	0	0	0	0	0	0	0	0	0	0	0	0	0	0	0	0	0	2	0	0	0	0	0
chr11:85685750-85714494	85685750	85714494	0	0	0	0	0	0	1	0	0	1	0	0	0	0	0	0	0	0	0	0	0	0	2	0	0	2	1	1	0	6	0	0	0	0	0	1	0	0	0	0
chr11:85685750-85718626	85685750	85718626	0	0	0	0	0	0	0	0	0	0	0	0	0	0	0	0	0	0	0	0	0	0	0	0	0	0	0	0	0	0	0	0	0	1	2	1	4	0	0	0
chr11:85685750-85722179	85685750	85722179	0	0	0	0	0	0	0	0	0	0	0	0	0	0	0	0	0	0	0	0	0	0	0	0	0	0	0	0	0	0	0	0	0	0	0	2	0	0	0	0
chr11:85685750-85726006	85685750	85726006	0	0	0	0	0	0	0	0	0	0	0	0	0	0	0	0	0	0	0	0	0	0	0	1	3	0	0	2	2	0	0	0	4	2	0	2	8	0	0	0
chr11:85685750-85742653	85685750	85742653	0	0	0	0	0	0	0	2	0	0	3	1	3	2	3	0	5	2	5	1	5	4	3	4	8	13	5	10	8	6	7	7	10	28	33	28	6	0	9	2
chr11:85692171-85693031	85692171	85693031	0	0	0	0	0	0	0	0	0	0	0	0	0	0	0	0	0	0	1	0	0	0	0	0	0	0	1	1	0	5	0	0	3	0	0	5	0	0	0	0
chr11:85692171-85693046	85692171	85693046	0	1	0	0	0	0	0	0	1	0	0	0	0	0	0	1	0	0	0	0	0	0	0	0	0	2	1	3	3	6	0	2	0	6	7	7	0	1	0	0
chr11:85692171-85695016	171384342	171390032	0	0	0	0	1	0	1	0	0	0	1	0	0	0	1	2	3	0	1	2	0	0	0	0	1	1	1	2	0	2	0	0	10	15	30	10	0	6	2	0
chr11:85692171-85701442	85692171	85701442	0	0	0	0	0	0	0	0	0	1	0	1	1	0	0	0	0	0	0	0	0	1	0	0	3	4	0	1	0	0	0	0	0	5	0	5	4	3	3	0
chr11:85692171-85707972	85692171	85707972	0	0	0	0	0	0	0	0	0	0	1	0	0	0	0	0	0	0	0	0	0	0	0	0	0	1	0	0	3	0	0	0	0	0	0	1	0	0	0	0
chr11:85692171-85712201	85692171	85712201	0	0	0	0	0	0	0	0	0	0	0	0	0	0	0	0	0	0	0	0	0	0	0	0	0	1	0	0	0	0	0	0	0	0	2	0	0	0	0	0
chr11:85692171-85718626	85692171	85718626	0	0	0	0	0	0	0	0	0	1	0	0	0	0	0	1	0	0	0	0	0	0	0	0	0	1	0	0	0	0	0	0	0	4	0	0	0	0	4	0
chr11:85692171-85722179	85692171	85722179	0	0	0	0	0	0	0	0	0	0	0	0	0	0	0	0	0	0	0	0	0	2	0	0	0	0	0	0	0	0	0	0	0	1	5	0	4	0	0	0
chr11:85692171-85726006	85692171	85726006	0	0	0	0	0	0	0	0	0	0	0	0	0	0	0	0	0	0	1	0	1	0	0	0	0	0	0	0	1	3	0	0	0	4	4	5	0	0	1	0
chr11:85692171-85737409	85692171	85737409	0	0	0	0	0	0	0	0	0	0	1	0	0	0	0	0	0	0	0	0	0	0	0	0	0	1	2	1	0	0	0	0	0	2	0	0	0	0	5	0
chr11:85692171-85742653	85692171	85742653	2	1	0	0	1	0	0	0	1	0	0	1	2	0	1	2	1	3	2	2	2	6	1	4	2	8	4	7	4	7	20	2	8	33	18	12	8	16	28	7
chr11:85692787-85693046	85692787	85693046	0	0	0	0	0	0	1	0	2	0	0	0	0	0	0	0	2	0	0	0	0	1	0	1	6	0	0	0	0	0	0	0	0	0	0	2	0	0	0	0
chr11:85692787-85695016	85692787	85695016	0	0	0	0	1	0	0	1	1	0	1	0	0	0	1	0	1	0	1	0	0	1	0	0	0	0	0	0	1	2	0	0	4	4	0	1	0	0	0	0
chr11:85692787-85701442	85692787	85701442	0	0	0	0	0	1	0	0	0	1	0	0	0	0	0	0	0	0	0	1	0	0	1	2	2	6	1	2	3	20	0	0	12	51	32	24	13	5	3	0
chr11:85692787-85707972	85692787	85707972	2	0	0	0	0	0	2	2	0	1	0	0	1	2	0	2	3	3	0	1	4	1	0	0	0	2	0	0	2	0	0	2	4	27	9	6	0	9	0	0
chr11:85692787-85718626	85692787	85718626	0	0	0	0	0	0	0	0	0	0	0	0	0	0	0	1	0	0	0	0	0	0	0	0	0	0	0	0	0	0	3	0	0	1	6	0	0	0	0	0
chr11:85692787-85722179	85692787	85722179	0	1	0	0	0	0	1	1	0	0	0	0	1	0	0	0	0	0	0	0	0	0	1	0	2	0	0	2	0	0	0	0	0	1	0	1	3	0	0	0
chr11:85692787-85742653	85692787	85742653	0	0	0	0	0	0	0	0	0	0	0	0	0	0	0	0	0	0	0	0	0	0	1	0	2	0	1	0	0	0	0	3	0	0	0	0	1	0	0	0
chr11:85694908-85714494	85694908	85714494	0	0	0	0	0	0	0	0	0	0	0	0	0	0	0	0	0	1	0	0	0	0	0	0	0	0	0	0	0	0	0	0	0	0	2	0	0	0	0	0
chr11:85694908-85722179	85694908	85722179	0	0	0	0	0	0	0	0	0	0	0	0	0	0	0	0	0	0	0	0	0	0	0	0	0	0	0	0	0	0	0	0	6	0	0	0	0	0	0	0
chr11:85694908-85742653	85694908	85742653	0	0	0	0	0	0	0	0	0	0	1	0	0	0	0	0	0	0	0	0	0	0	0	0	0	0	0	0	0	0	0	0	0	1	6	2	0	0	0	0
chr11:85701292-85712201	85701292	85712201	0	0	0	0	0	0	0	0	0	0	0	0	0	0	0	0	0	0	0	0	0	0	0	0	0	0	0	0	0	0	0	0	2	0	0	0	0	0	0	0
chr11:85701292-85718626	85701292	85718626	0	0	0	0	0	0	0	0	0	0	0	0	0	0	0	0	0	0	0	0	0	0	0	0	0	0	0	0	0	0	0	0	3	0	0	0	0	0	0	0
chr11:85701292-85726006	85701292	85726006	0	0	0	0	0	0	0	0	0	0	0	0	0	0	0	0	0	0	0	0	0	0	0	0	0	0	2	0	0	3	10	0	5	0	4	5	0	0	0	0
chr11:85701292-85737409	85701292	85737409	0	0	0	0	0	0	0	0	0	0	0	0	0	0	0	0	0	0	0	0	0	0	0	0	0	0	0	0	0	3	0	0	0	0	0	0	0	0	0	0
chr11:85701292-85742653	85701292	85742653	1	1	1	0	1	0	0	0	1	0	1	0	6	3	1	2	1	3	4	1	1	6	0	2	4	3	2	0	1	2	0	11	20	39	29	3	12	0	11	0
chr11:85707868-85712201	85707868	85712201	0	0	0	1	0	1	0	0	0	0	0	1	3	0	0	0	0	0	0	3	0	0	2	2	6	5	2	2	7	0	0	0	1	8	11	6	0	0	2	13
chr11:85707868-85714494	85707868	85714494	3	1	0	4	0	3	2	0	1	6	2	5	3	7	4	3	10	15	5	5	8	8	7	6	10	21	10	22	33	11	0	2	31	91	105	106	63	10	40	16
chr11:85707868-85718626	85707868	85718626	0	0	0	0	0	0	0	0	0	0	0	1	0	3	1	0	0	1	1	0	1	1	2	3	1	1	0	2	1	0	0	2	0	5	1	4	8	0	6	0
chr11:85707868-85722179	85707868	85722179	0	0	0	0	0	0	0	0	0	0	0	0	0	0	0	1	0	0	0	0	0	0	0	0	0	0	0	0	0	0	0	0	0	0	5	0	0	0	0	0
chr11:85707868-85723435	85707868	85723435	0	0	0	0	0	0	0	0	0	0	0	0	0	0	0	0	0	0	0	0	0	0	0	0	0	0	0	0	0	0	0	0	0	0	0	0	0	0	0	4
chr11:85707868-85726006	85707868	85726006	0	0	0	0	0	0	1	0	0	0	0	0	0	0	0	0	0	0	0	0	1	0	0	1	0	2	0	0	0	5	0	0	5	0	9	11	6	2	10	0
chr11:85707868-85737409	85707868	85737409	0	0	0	0	0	0	0	0	0	0	0	0	0	0	0	0	0	0	0	0	0	0	0	0	1	0	0	0	0	0	0	0	0	2	0	1	0	0	0	0
chr11:85707868-85742653	85707868	85742653	0	2	6	1	2	2	1	1	0	1	1	4	4	2	4	2	7	12	14	2	9	9	8	13	6	20	4	14	17	25	0	13	52	103	159	44	78	10	41	20
chr11:85711685-85714494	85711685	85714494	0	0	0	0	0	0	0	0	0	0	0	0	0	0	0	0	0	0	0	0	0	0	0	0	2	0	0	2	0	0	0	0	0	0	0	0	0	0	0	0
chr11:85711685-85726006	85711685	85726006	0	0	0	0	0	0	0	0	0	0	0	0	0	0	0	0	0	0	0	0	0	0	0	0	0	0	0	0	0	0	0	7	0	0	0	0	0	0	0	0
chr11:85711685-85742653	85711685	85742653	0	1	0	0	0	0	0	0	0	1	0	0	0	0	0	1	0	0	0	0	0	0	1	0	1	6	0	1	4	0	0	0	15	7	19	4	2	0	3	0
chr11:85712077-85742653	85712077	85742653	0	0	0	0	0	0	0	0	0	0	0	1	3	0	2	1	0	1	0	0	0	0	1	0	0	0	0	0	0	3	0	0	0	6	2	1	0	0	5	0
chr11:85714408-85737409	85714408	85737409	0	0	0	0	0	0	0	0	0	0	0	0	0	0	0	0	0	0	0	0	0	0	0	0	0	0	0	0	0	0	0	0	1	0	0	1	0	0	7	0
chr11:85714408-85742653	85714408	85742653	0	0	0	0	0	1	0	0	0	0	0	0	0	0	1	0	0	0	0	1	0	0	1	0	0	3	1	0	0	0	0	4	4	7	8	1	0	0	0	0
chr11:85718584-85726006	85718584	85726006	0	0	0	0	0	0	0	0	0	0	0	0	0	0	0	0	0	0	0	0	0	0	0	0	1	1	0	1	0	3	9	0	1	7	7	0	0	0	0	0
chr11:85718584-85733512	85718584	85733512	0	0	0	0	0	0	0	0	0	0	0	0	0	0	0	0	0	0	0	0	0	0	0	0	0	0	0	0	0	0	0	0	0	2	0	5	0	0	1	0
chr11:85718584-85737409	85718584	85737409	0	0	0	1	1	0	0	0	0	0	0	0	0	0	1	0	0	0	0	0	0	1	0	0	0	1	0	1	0	0	0	0	9	5	4	0	2	0	0	0
chr11:85718584-85742653	171437168	171485306	2	3	1	0	3	2	1	0	3	4	0	2	2	8	0	7	7	7	8	5	4	6	7	8	12	14	7	3	4	49	8	23	58	74	115	35	57	15	18	12
chr11:85722072-85726006	85722072	85726006	0	0	0	0	0	0	0	0	0	0	0	0	0	0	0	0	0	0	0	0	0	0	1	0	2	0	0	0	1	0	0	0	0	0	4	5	0	0	0	0
chr11:85722072-85737409	85722072	85737409	0	0	0	0	0	0	0	0	0	0	0	0	0	0	0	0	0	0	0	0	0	0	0	0	0	0	0	0	0	0	0	0	0	1	0	0	0	0	3	0
chr11:85722072-85742653	85722072	85742653	1	0	0	0	2	2	1	1	1	1	0	2	3	0	0	1	2	2	3	5	0	2	6	3	2	12	0	2	2	7	1	16	43	39	45	21	10	0	18	0
chr11:85723323-85742653	85723323	85742653	0	0	1	1	0	0	0	0	0	1	1	1	0	0	0	1	0	1	0	1	0	3	2	0	1	1	0	0	1	2	0	6	0	7	3	2	4	0	1	0
chr11:85725912-85742653	85725912	85742653	0	0	0	0	0	0	1	0	0	1	0	0	0	1	0	0	1	1	0	0	0	0	0	0	0	0	0	3	2	4	0	5	0	0	6	3	5	0	2	0
chr11:85733409-85742653	171466818	171485306	3	1	0	2	4	0	3	5	2	2	3	2	6	0	1	1	4	3	5	4	0	2	3	1	1	5	0	1	3	29	18	4	20	18	17	4	10	0	2	7
chr11:85961337-85963282	85961337	85963282	0	0	0	0	0	0	0	0	0	0	0	0	0	0	0	1	0	1	0	0	0	0	0	0	0	0	0	0	0	3	0	0	0	0	0	0	0	0	0	0
chr11:85961337-85967554	85961337	85967554	0	1	1	0	0	0	0	0	0	0	0	1	0	0	1	0	0	0	0	0	0	1	0	0	0	1	0	0	0	0	0	0	0	0	0	2	0	0	0	0
chr11:85975213-85989033	85975213	85989033	0	0	0	0	0	0	0	0	0	0	0	0	0	0	0	0	0	0	0	0	0	0	0	0	0	0	0	0	0	0	0	0	0	0	3	0	0	0	0	0
chr11:85988021-85989033	85988021	85989033	0	0	0	0	0	0	0	0	0	0	0	0	0	0	0	0	0	0	0	0	0	0	0	0	0	0	0	0	0	0	0	0	0	0	2	0	0	0	0	0
chr11:86017286-86017524	86017286	86017524	0	0	0	0	0	0	0	0	0	0	0	0	0	0	0	0	0	0	0	0	0	0	0	0	0	0	0	0	0	0	0	0	0	0	2	0	0	0	0	0
chr11:86778735-86802437	86778735	86802437	1	0	0	0	0	0	0	0	0	0	0	0	0	0	0	0	0	0	0	0	0	0	0	0	0	0	0	0	0	0	0	0	0	0	3	0	0	0	0	0
chr11:87016977-87029277	87016977	87029277	0	0	0	0	0	0	0	0	0	0	0	0	0	0	0	0	0	0	0	0	0	0	0	0	0	0	0	0	0	0	0	4	0	0	2	0	0	0	0	0
chr11:899429-900003	899429	900003	0	0	0	0	0	0	0	0	0	0	0	0	0	0	0	0	0	0	0	0	0	0	0	0	0	0	0	0	0	0	0	0	0	0	4	0	0	0	0	0
chr11:89943703-89951352	89943703	89951352	0	0	0	0	0	2	0	0	1	0	0	0	0	0	0	0	0	0	0	0	0	0	0	0	0	0	0	0	0	0	0	0	0	0	0	0	0	0	0	0
chr11:89947185-89951352	89947185	89951352	0	0	0	0	0	0	0	0	0	0	0	0	0	0	0	0	0	0	0	0	0	0	0	0	0	0	2	0	0	0	0	0	0	0	0	0	0	0	0	0
chr11:9304917-9309353	9304917	9309353	0	0	0	0	0	0	0	0	0	0	0	0	0	0	0	0	0	0	0	0	0	0	0	0	0	0	0	0	0	0	2	0	0	0	0	0	0	0	0	0
chr11:9304917-9321248	9304917	9321248	0	0	0	1	0	0	0	0	0	0	0	0	0	0	0	0	0	0	0	0	0	0	0	0	0	0	0	0	0	0	0	0	2	0	0	0	0	0	0	0
chr11:9308001-9316934	9308001	9316934	1	0	0	0	0	0	0	0	0	0	0	0	0	0	0	0	0	0	0	0	0	0	0	0	0	0	0	0	0	0	0	0	3	4	0	0	1	9	0	0
chr11:9308001-9321248	9308001	9321248	0	1	0	0	0	0	0	0	1	0	0	0	1	0	0	0	0	0	0	1	0	0	0	0	0	1	0	0	0	1	0	0	0	3	0	0	0	0	0	0
chr11:93399847-93402936	93399847	93402936	0	0	0	0	0	0	0	0	0	0	0	0	0	0	1	0	0	0	0	0	1	0	0	0	0	0	0	0	0	0	0	0	0	0	0	0	0	0	4	0
chr11:93399847-93408832	93399847	93408832	0	0	0	0	0	1	0	0	0	0	0	0	0	0	0	0	0	0	0	0	0	0	0	0	0	0	0	0	0	0	0	0	1	0	0	2	0	0	0	0
chr11:93399847-93412718	93399847	93412718	0	0	0	0	0	0	0	0	0	0	0	0	0	0	0	0	0	0	0	0	0	0	0	0	0	0	0	0	0	0	0	0	4	0	0	0	0	0	0	0
chr11:93416724-93421031	93416724	93421031	0	0	0	0	0	0	0	0	0	0	0	0	0	0	0	0	0	0	0	0	0	0	0	0	0	0	0	0	0	0	0	0	4	0	0	0	3	0	0	0
chr11:93429485-93433352	93429485	93433352	0	0	0	0	0	0	0	0	0	0	0	0	0	1	1	0	0	0	0	1	1	1	1	1	0	1	0	0	0	0	0	5	2	0	0	3	0	0	0	0
chr11:93429847-93436085	93429847	93436085	0	0	0	0	0	0	0	0	0	0	0	0	0	1	0	0	0	0	0	0	0	0	0	0	0	0	0	0	0	0	0	0	0	0	0	0	0	7	0	0
chr11:93456206-93457541	93456206	93457541	0	0	0	0	0	0	0	0	0	0	0	0	0	0	0	0	0	0	0	1	0	0	0	0	0	0	0	0	0	0	0	0	1	0	0	0	0	0	6	0
chr11:93457419-93458997	93457419	93458997	0	0	0	0	0	0	0	0	0	0	0	0	0	0	0	0	0	1	0	0	0	0	0	0	0	2	0	0	0	0	0	0	0	0	4	0	0	0	0	0
chr11:93458816-93460803	93458816	93460803	0	0	0	0	0	0	0	0	0	0	0	0	0	0	0	0	0	0	0	0	0	0	0	0	0	0	0	0	0	3	0	0	0	0	4	0	0	0	0	0
chr11:93461846-93463314	93461846	93463314	0	0	0	0	0	0	0	0	0	0	0	0	0	0	0	0	0	0	0	0	0	0	0	0	0	0	0	0	0	0	0	0	0	0	3	1	0	0	0	0
chr11:93463842-93472497	93463842	93472497	0	0	0	0	0	0	0	0	0	0	0	0	0	0	0	0	0	0	0	0	0	0	0	0	0	0	0	0	0	0	0	0	4	0	0	0	0	0	0	0
chr11:93480462-93490631	93480462	93490631	0	0	0	0	0	0	0	0	0	0	0	0	0	0	0	0	0	0	0	0	0	0	0	0	4	0	0	0	0	0	0	0	0	0	0	0	0	0	0	0
chr11:93480462-93493024	93480462	93493024	0	0	0	0	0	0	0	0	0	0	0	0	0	0	0	0	0	0	0	0	0	0	0	0	0	0	0	0	0	6	0	0	0	0	0	1	0	0	0	0
chr11:93480467-93490631	93480467	93490631	0	0	0	0	0	0	0	0	0	0	0	0	0	0	0	0	0	0	0	0	0	0	0	0	0	0	0	0	0	0	0	0	0	0	2	0	0	0	0	0
chr11:93521166-93523959	93521166	93523959	0	0	1	0	0	0	0	0	0	0	0	0	0	0	0	0	0	1	0	0	0	0	0	0	0	0	0	0	1	0	0	0	0	0	0	0	4	0	0	0
chr11:93521166-93527201	93521166	93527201	0	0	0	0	0	0	0	0	0	0	0	0	0	0	0	0	0	0	0	0	1	3	0	0	0	0	0	1	1	0	0	0	0	0	2	0	2	0	0	0
chr11:93521166-93528226	93521166	93528226	0	0	0	0	0	0	0	0	0	0	0	0	0	0	0	0	0	0	0	0	0	0	0	0	0	0	0	0	0	0	0	0	0	0	0	0	0	0	5	0
chr11:93521166-93529706	93521166	93529706	0	0	0	0	0	0	0	0	0	0	0	0	0	0	0	0	0	0	0	0	2	0	0	0	0	0	0	0	0	0	0	0	0	0	0	0	0	0	0	0
chr11:93521166-93535138	93521166	93535138	0	1	0	0	0	0	0	0	0	0	0	0	0	0	0	0	0	0	0	0	0	0	0	0	0	0	0	1	0	0	13	3	0	6	0	1	4	0	0	0
chr11:93523739-93527201	93523739	93527201	0	0	0	0	0	0	0	0	0	0	0	0	0	0	0	0	0	0	0	0	1	0	0	1	0	1	0	1	0	3	0	0	0	2	1	2	0	0	0	0
chr11:93523739-93528226	93523739	93528226	0	0	0	0	0	0	0	0	0	0	0	0	0	0	0	0	0	0	0	0	0	0	0	0	0	1	0	0	0	0	0	2	0	0	0	0	0	0	0	0
chr11:93523739-93530885	93523739	93530885	0	0	0	0	0	0	0	0	0	0	0	0	0	0	0	0	0	0	0	0	0	0	0	0	0	0	0	0	0	0	0	0	2	0	0	0	0	0	0	0
chr11:93523739-93535138	93523739	93535138	0	0	0	0	0	0	0	0	1	0	0	0	0	0	0	0	0	0	0	0	0	0	0	0	1	0	0	0	0	0	0	0	0	7	8	1	2	3	0	0
chr11:93526893-93530885	93526893	93530885	0	0	0	0	0	0	0	0	0	0	0	0	0	0	0	0	0	0	0	0	0	0	0	0	0	0	0	0	0	0	0	0	0	0	0	0	0	0	2	0
chr11:93526893-93535138	93526893	93535138	0	0	0	0	1	0	0	0	0	0	0	0	0	0	0	0	0	0	1	0	0	0	0	2	0	0	0	0	0	0	0	0	0	0	0	0	0	0	0	0
chr11:93528073-93535138	93528073	93535138	0	0	0	0	0	0	0	0	0	0	0	0	0	0	0	0	0	0	0	0	0	0	0	0	2	0	0	1	0	0	0	0	0	0	0	1	0	0	0	0
chr11:94163076-94180604	94163076	94180604	0	0	0	0	1	0	0	0	0	0	0	0	0	0	0	0	0	0	0	0	0	0	0	0	0	0	0	0	0	0	0	0	2	0	0	0	0	0	0	0
chr11:94178975-94180604	94178975	94180604	0	1	0	1	0	0	0	0	1	0	0	3	0	2	0	1	0	1	0	1	0	0	0	0	0	0	0	0	0	0	0	0	0	0	0	4	0	0	0	0
chr11:94219089-94224131	94219089	94224131	0	0	0	0	1	0	0	0	0	0	0	0	0	0	1	0	0	0	0	0	0	1	0	0	0	0	0	0	0	10	0	0	4	0	5	0	0	0	0	0
chr11:9424836-9435958	9424836	9435958	0	0	0	0	0	0	0	0	0	0	0	0	0	0	0	0	0	0	0	0	0	0	0	0	2	0	0	0	0	0	0	0	0	0	0	0	0	0	0	0
chr11:9424836-9442052	9424836	9442052	0	0	0	0	0	0	0	0	0	0	0	0	0	0	0	0	0	0	0	0	0	0	0	0	0	0	0	0	0	0	0	0	0	0	0	2	0	0	0	0
chr11:9451220-9452550	9451220	9452550	4	0	1	2	0	0	0	1	0	0	0	0	0	0	0	0	0	0	0	0	0	0	0	0	0	0	0	0	0	0	0	0	0	0	0	0	0	0	0	0
chr11:94528176-94533477	94528176	94533477	1	0	1	0	0	0	0	1	0	1	0	0	0	0	0	0	0	0	0	0	0	0	0	0	0	0	0	2	0	0	0	0	0	0	0	0	0	0	0	0
chr11:9459300-9463744	9459300	9463744	0	0	0	0	0	0	0	0	0	0	0	0	0	0	0	1	0	0	0	0	0	0	0	1	0	0	0	0	0	0	0	0	0	0	0	2	0	0	0	0
chr11:9462001-9463744	9462001	9463744	0	0	0	0	0	0	0	1	0	0	0	0	1	0	0	0	0	0	0	0	0	1	0	0	0	2	0	0	0	4	0	0	1	0	0	6	0	0	0	0
chr11:94704140-94705357	94704140	94705357	0	0	0	0	0	0	0	0	0	0	0	0	0	0	0	0	0	0	0	0	0	0	0	0	0	0	0	0	0	0	0	0	5	0	0	0	0	0	0	0
chr11:94908661-94911992	94908661	94911992	0	0	0	0	0	0	0	0	0	0	0	0	0	0	0	0	0	0	0	0	0	0	0	0	0	0	0	0	0	0	0	0	0	0	3	2	0	0	0	0
chr11:94910882-94924765	94910882	94924765	0	0	0	0	0	0	0	0	0	0	0	0	0	0	0	0	0	0	0	0	0	0	0	0	0	0	0	0	0	0	0	0	0	2	0	0	0	0	0	0
chr11:94910882-94926686	94910882	94926686	0	0	0	0	0	0	0	0	0	0	0	0	0	0	0	0	0	0	0	0	0	0	0	0	2	2	1	1	1	2	0	0	1	0	2	1	0	0	0	0
chr11:94917583-94924765	94917583	94924765	0	0	0	0	0	0	0	0	0	0	0	0	0	0	0	0	0	0	0	0	0	0	0	0	0	0	0	0	0	0	0	0	0	4	0	0	0	0	0	0
chr11:94917583-94926686	94917583	94926686	1	0	0	0	0	0	0	0	0	0	0	1	0	0	0	0	1	1	0	0	0	0	0	1	9	2	0	0	0	9	17	0	1	11	3	2	0	0	5	0
chr11:94918419-94926686	94918419	94926686	0	0	0	0	0	0	0	0	0	0	0	0	0	0	0	0	0	0	0	0	0	0	0	0	0	0	0	0	1	0	0	0	0	0	2	0	0	0	0	0
chr11:94922942-94926686	94922942	94926686	0	0	0	0	0	0	0	0	0	0	0	0	0	0	0	0	0	0	0	0	0	1	0	0	0	0	0	1	0	1	0	0	1	4	6	0	2	0	0	0
chr11:94924567-94926686	94924567	94926686	0	0	0	0	0	0	0	0	0	0	0	0	0	0	0	0	0	0	0	0	0	0	0	0	2	0	0	0	0	0	0	0	0	0	0	0	0	0	0	0
chr11:9516192-9534143	9516192	9534143	0	0	0	0	0	0	0	0	0	0	0	0	0	0	0	0	0	0	0	0	0	0	0	1	0	0	0	2	0	0	0	0	0	2	0	0	0	0	0	0
chr11:9517849-9522817	9517849	9522817	0	0	0	0	0	0	0	0	0	0	0	0	0	0	0	0	0	0	0	0	0	0	0	0	0	0	0	0	0	0	0	0	0	0	0	0	0	0	5	0
chr11:9519221-9534143	9519221	9534143	0	0	0	0	0	0	0	0	0	0	0	0	0	0	0	0	0	0	0	0	0	0	0	0	0	0	0	0	0	0	0	0	0	0	0	0	2	0	0	0
chr11:9522637-9534143	9522637	9534143	0	0	0	0	0	0	0	0	0	0	0	0	0	0	0	0	0	0	0	0	0	0	0	0	0	0	0	0	0	0	0	0	0	1	0	0	0	0	10	0
chr11:9530165-9537909	9530165	9537909	0	0	0	0	0	0	0	0	0	0	0	0	0	0	0	0	0	0	0	0	0	0	0	0	0	0	0	0	2	0	0	0	0	0	0	0	0	0	0	0
[truncated: 18,932 more rows]

## Sheet: HC circRNA
ID	Start	End	A_d0	B_d0	C_d0	D_d0	A_d1	B_d1	C_d1	D_d1	A_d2	B_d2	C_d2	D_d2	A_d3	B_d3	C_d3	D_d3	A_d4	B_d4	C_d4	D_d4	A_d5	B_d5	C_d5	D_d5	A_d6	B_d6	C_d6	D_d6	A_d7	B_d7	C_d7	D_d7	A_d9	B_d9	C_d9	D_d9	A_d12	B_d12	C_d12	D_d12
chr10:105767934-105778666	105767934	105778666	1	1	0	0	0	0	0	0	0	0	0	0	0	1	1	0	0	1	0	0	0	1	0	0	5	1	0	0	2	0	0	2	8	18	4	4	7	0	1	0
chr10:115636279-115644139	115636279	115644139	0	1	0	0	0	0	0	2	0	1	0	1	0	0	0	2	0	1	0	1	0	2	0	0	1	4	0	1	3	8	0	0	4	12	5	19	5	0	3	0
chr10:12039670-12056183	24079340	24112366	4	3	2	0	1	1	1	0	1	3	1	2	0	3	0	1	2	1	2	2	5	5	2	0	4	11	2	4	5	19	23	14	10	32	13	5	11	4	9	0
chr10:126097110-126097534	126097110	126097534	0	0	0	0	0	0	0	0	0	0	0	0	0	0	0	0	2	0	0	1	0	0	0	1	8	0	0	0	0	8	0	0	10	4	9	7	1	0	18	0
chr10:126097110-126100769	126097110	126100769	0	0	0	0	1	0	1	2	0	2	0	0	3	0	0	0	0	1	1	1	1	1	0	0	4	7	0	2	3	0	9	1	4	8	10	7	0	0	1	0
chr10:126370175-126370948	126370175	126370948	1	0	2	0	0	1	1	5	2	1	4	1	1	0	1	2	2	2	5	4	2	3	2	1	1	2	3	3	5	0	0	0	0	6	8	0	0	0	0	1
chr10:126631025-126631876	253262050	253263752	4	5	3	1	6	1	4	2	3	2	2	3	1	5	2	1	4	2	0	2	3	3	3	4	12	10	2	6	13	15	2	10	40	50	39	26	19	0	14	5
chr10:13152273-13164487	13152273	13164487	0	0	0	0	0	0	0	0	0	0	0	0	0	0	0	0	0	0	0	0	0	0	0	0	1	0	0	1	0	0	0	1	2	9	5	7	0	0	0	0
chr10:13214375-13214765	26428750	26429530	1	1	0	3	0	1	0	1	2	1	0	0	4	0	0	3	1	0	1	2	0	0	2	1	0	0	0	0	1	0	0	0	2	2	3	6	0	0	2	0
chr10:15875628-15889942	31751256	31779884	1	0	0	5	1	0	0	1	2	2	1	2	0	5	3	5	4	2	1	4	0	0	1	3	2	3	2	8	3	11	0	2	7	11	9	11	0	0	2	0
chr10:17746429-17747740	17746429	17747740	0	0	1	0	0	1	1	2	0	1	3	2	1	2	2	2	5	3	3	1	6	10	5	4	4	10	1	3	8	5	4	11	12	16	16	8	16	0	4	0
chr10:22839587-22898646	22839587	22898646	0	0	0	0	0	0	0	0	0	0	0	0	0	0	0	0	0	0	0	0	0	0	2	0	0	1	0	0	0	0	0	0	4	2	5	2	3	0	0	0
chr10:22880557-22898646	45761114	45797292	1	1	0	0	0	0	1	0	0	1	0	3	0	1	0	0	0	0	2	1	2	2	1	0	10	6	1	8	18	2	0	13	25	18	47	46	13	0	13	8
chr10:27054146-27059274	54108292	54118548	0	0	0	0	0	0	0	0	0	0	0	0	0	0	0	0	0	1	0	0	0	0	1	0	0	0	1	1	1	3	0	0	12	4	2	13	0	0	0	0
chr10:31661946-31676195	63323892	63352390	1	0	0	0	0	0	0	0	0	0	1	1	0	0	0	1	0	0	0	1	0	2	1	0	0	0	0	0	0	5	2	1	11	11	11	4	2	0	5	0
chr10:31749965-31750166	31749965	31750166	0	0	0	0	0	0	0	0	0	0	1	0	0	0	0	0	0	1	1	1	0	0	0	1	0	0	0	0	0	0	0	0	3	7	4	4	0	0	0	0
chr10:32197099-32199491	32197099	32199491	2	0	0	0	1	1	0	0	0	0	1	3	0	0	0	1	1	0	0	0	0	2	0	0	2	3	1	1	4	4	1	1	5	4	18	4	7	0	0	0
chr10:32832227-32873232	32832227	32873232	0	0	0	0	2	0	0	1	1	2	0	1	0	0	1	5	0	0	0	0	0	0	0	0	0	0	0	0	3	9	5	7	14	2	9	0	0	9	5	0
chr10:32854485-32873232	32854485	32873232	0	1	0	3	2	0	0	1	0	1	0	0	0	1	0	0	0	0	1	0	0	1	0	0	2	6	1	1	0	0	6	0	3	5	5	4	0	0	5	0
chr10:46214753-46215403	46214753	46215403	0	0	0	0	0	0	0	0	0	0	0	0	0	0	0	0	0	0	0	0	0	0	0	0	0	1	0	0	0	0	0	0	3	8	2	3	0	0	0	0
chr10:46224309-46235694	46224309	46235694	0	0	0	0	0	0	0	0	0	0	0	0	3	0	0	0	0	0	0	0	0	0	0	0	0	0	2	2	0	1	0	0	3	9	4	8	8	4	0	5
chr10:51374369-51387763	51374369	51387763	1	2	4	1	1	0	1	0	0	2	1	2	0	0	1	3	1	2	1	0	1	0	0	2	2	0	0	1	2	0	0	0	2	2	14	5	0	0	4	0
chr10:51579127-51581378	51579127	51581378	0	0	0	1	0	0	0	0	0	0	0	0	0	0	0	0	0	0	1	0	3	1	1	0	10	6	6	6	5	5	2	1	3	36	4	19	3	8	6	0
chr10:51579127-51586411	51579127	51586411	0	0	0	0	0	1	1	1	0	0	0	0	1	0	0	0	0	0	1	0	0	0	0	0	0	2	3	1	2	0	0	0	5	7	7	9	0	0	0	0
chr10:51584615-51585599	51584615	51585599	0	0	0	0	0	0	1	0	0	0	0	1	2	1	0	1	0	1	1	2	5	7	4	2	12	5	6	17	11	1	2	3	13	16	25	4	1	2	22	0
chr10:51606987-51620382	51606987	51620382	2	0	0	1	0	0	0	0	0	0	0	1	0	0	0	0	0	1	0	0	0	0	0	0	3	0	1	3	2	0	0	0	2	6	2	3	12	5	4	0
chr10:51829306-51840691	51829306	51840691	0	0	0	0	0	0	1	0	0	2	0	0	0	0	0	0	0	0	0	0	1	2	0	3	1	0	1	5	2	2	0	3	8	14	5	9	4	0	10	0
chr10:52193235-52226692	52193235	52226692	0	0	0	0	2	0	1	0	0	0	0	0	0	0	1	1	1	3	0	0	1	2	2	0	0	1	1	6	0	0	0	15	2	6	3	5	0	0	0	0
chr10:52193235-52350007	104386470	104700014	0	0	0	0	0	2	0	1	1	0	0	3	0	0	0	0	3	0	1	0	6	2	7	1	14	5	7	3	28	9	11	4	27	14	47	18	19	18	26	7
chr10:52220432-52350007	104440864	104700014	0	0	0	0	0	0	2	0	0	0	0	1	1	2	0	0	0	2	0	0	3	3	0	3	6	6	3	4	9	15	0	3	10	21	15	18	8	0	21	1
chr10:52279590-52350007	104559180	104700014	0	0	0	0	0	0	0	0	0	0	0	0	0	0	0	0	0	0	0	0	0	0	0	2	0	0	3	1	0	0	1	0	3	27	2	8	0	9	0	0
chr10:5815804-5842668	5815804	5842668	3	2	1	3	2	2	2	2	3	1	1	1	1	0	1	3	0	2	0	0	0	1	2	0	0	3	0	1	1	2	0	2	12	12	1	1	8	0	4	0
chr10:64936056-64968995	64936056	64968995	0	0	0	0	0	0	0	0	0	0	0	0	0	0	0	0	0	0	0	0	0	1	0	0	0	1	0	0	5	0	0	0	7	10	7	3	0	0	0	0
chr10:64966354-64968995	64966354	64968995	0	0	0	0	0	0	0	0	0	0	0	0	0	0	2	0	1	0	0	1	3	2	1	0	0	4	0	1	2	0	0	2	2	6	6	2	6	0	0	0
chr10:69647174-69651312	69647174	69651312	0	0	0	0	0	0	0	0	0	0	0	0	0	1	0	1	0	0	0	0	0	0	0	0	0	0	0	0	1	0	0	0	2	9	2	2	0	0	2	0
chr10:70100930-70101608	140201860	140203216	0	0	0	0	0	0	0	0	0	0	0	0	0	0	0	0	0	0	0	0	0	0	0	0	1	1	0	4	1	0	9	0	16	15	10	13	6	5	3	0
chr10:70227879-70229920	140455758	140459840	3	2	3	4	2	1	4	3	1	2	1	0	2	2	4	7	5	2	4	3	1	2	2	2	0	1	0	4	1	0	0	0	0	19	9	8	0	0	3	0
chr10:70719561-70720005	141439122	141440010	0	1	1	3	1	1	1	1	2	0	3	2	2	0	1	1	1	5	1	0	1	4	1	1	2	3	1	3	2	0	0	0	11	14	9	5	15	0	10	0
chr10:74322652-74326552	74322652	74326552	0	0	0	0	0	0	0	0	0	0	0	0	0	0	0	0	1	0	0	0	0	0	0	0	0	0	1	0	0	1	0	0	5	4	2	5	0	0	0	0
chr10:7839009-7844817	15678018	15689634	7	8	4	5	2	3	2	4	2	6	3	1	4	3	6	3	0	8	3	1	2	9	5	2	2	18	1	6	0	27	0	8	4	28	34	7	0	1	1	0
chr10:88230748-88233730	88230748	88233730	0	0	0	0	0	0	0	0	0	0	0	0	0	0	0	0	0	0	1	0	1	0	0	1	3	0	0	0	3	0	0	3	2	3	11	13	1	4	0	0
chr10:88231964-88233730	88231964	88233730	0	0	0	0	0	0	0	0	0	0	0	0	0	0	0	0	0	0	0	0	0	0	2	0	1	0	0	0	0	0	0	0	13	7	2	3	2	0	0	0
chr10:89268092-89280926	89268092	89280926	1	0	0	0	0	2	2	1	1	2	1	3	2	0	0	3	2	3	1	0	0	2	1	3	1	7	0	4	7	8	0	12	15	29	24	10	15	0	0	13
chr10:91511102-91522592	183022204	183045184	5	2	2	6	3	2	7	6	4	3	2	5	3	7	2	3	6	4	10	3	4	7	5	11	4	10	7	12	13	29	12	23	60	107	78	70	39	7	52	35
chr10:98303832-98336586	98303832	98336586	0	2	0	1	0	0	0	1	1	0	0	0	1	0	0	1	0	4	1	2	1	4	1	1	5	1	0	3	0	9	9	10	23	6	3	6	6	0	4	9
chr11:10824576-10826562	10824576	10826562	0	0	0	0	0	0	0	0	0	0	0	0	0	0	0	0	1	0	0	0	0	0	0	0	1	1	1	1	0	8	0	9	7	29	5	12	5	0	0	0
chr11:116797934-116827780	116797934	116827780	0	0	0	0	0	0	0	0	0	0	0	0	0	0	0	0	0	0	0	0	0	0	1	0	3	2	1	2	8	9	0	0	11	24	12	6	6	0	5	0
chr11:117052131-117053522	234104262	234107044	0	0	0	1	0	0	0	0	0	0	0	0	0	0	0	0	0	0	0	0	1	0	0	0	2	0	1	2	3	0	0	0	4	3	7	9	5	0	2	0
chr11:120276826-120278532	120276826	120278532	0	0	1	0	0	0	0	0	0	0	0	0	0	0	0	0	1	0	1	1	6	4	6	4	9	4	1	6	13	1	0	6	4	11	36	15	2	10	9	0
chr11:120276826-120280159	120276826	120280159	0	0	0	0	1	0	0	0	0	0	1	1	1	0	0	3	0	1	3	2	5	4	3	2	0	0	0	1	0	3	0	0	5	0	0	7	0	0	0	0
chr11:120278446-120300540	240556892	240601080	0	0	0	0	0	0	0	0	0	0	0	0	0	0	0	0	0	0	0	0	2	0	1	0	9	3	3	2	7	16	6	11	27	35	38	19	16	0	4	27
chr11:120278446-120317794	240556892	240635588	0	0	0	0	0	0	0	0	0	0	0	0	0	0	0	0	0	0	0	1	1	1	1	1	7	3	0	2	2	4	0	4	18	6	17	13	0	0	5	0
chr11:120278446-120348235	120278446	120348235	0	0	0	0	0	0	0	0	0	0	0	0	0	0	0	0	0	0	0	0	0	1	0	0	0	0	1	1	0	3	0	7	3	15	13	8	6	0	0	0
chr11:120310837-120316173	120310837	120316173	0	0	0	0	0	0	0	1	0	0	0	0	0	0	0	0	0	0	0	0	0	0	4	2	6	1	2	3	1	10	6	5	6	26	5	9	1	5	3	0
chr11:120310837-120317794	120310837	120317794	0	0	0	0	0	0	0	0	0	0	0	0	0	1	0	0	1	1	0	0	1	0	2	1	5	3	0	3	10	12	0	0	12	21	12	24	3	11	18	0
chr11:120310837-120348235	120310837	120348235	0	0	0	0	0	0	0	0	0	0	0	0	0	0	0	0	0	0	2	0	3	1	3	3	4	3	2	5	10	0	16	0	0	14	4	8	1	4	0	0
chr11:120317111-120338017	120317111	120338017	0	0	0	0	0	0	0	0	0	0	0	0	0	0	0	0	0	0	0	0	1	0	1	0	0	1	0	1	1	2	0	0	5	7	6	7	0	0	0	0
chr11:120318582-120338017	240637164	240676034	0	0	0	0	0	0	0	0	0	0	0	0	0	0	0	0	0	0	0	0	2	1	0	0	0	2	1	4	4	4	10	0	13	10	19	6	4	0	4	13
chr11:120339996-120348235	240679992	240696470	1	0	0	0	0	0	0	0	0	0	0	0	0	0	0	0	1	0	1	0	1	4	3	2	8	3	4	5	13	10	1	4	15	29	37	22	10	4	14	2
chr11:120343758-120348235	240687516	240696470	0	0	0	0	0	1	0	0	0	0	1	1	0	0	0	1	1	1	3	1	10	1	6	4	15	15	4	11	40	14	0	4	35	72	59	57	50	2	41	0
chr11:120345268-120348235	120345268	120348235	0	1	0	1	0	0	0	0	0	0	2	0	1	0	1	0	5	1	4	1	6	3	4	8	13	12	3	16	24	34	14	22	32	58	38	34	16	3	11	1
chr11:120346048-120348235	240692096	240696470	0	0	0	0	0	1	0	0	0	0	0	0	0	0	1	0	2	0	0	2	0	0	0	0	2	14	3	3	13	7	1	1	20	19	43	30	9	7	11	0
chr11:120347369-120348235	240694738	240696470	0	0	0	0	0	0	0	0	0	0	0	1	0	0	0	0	1	0	1	0	5	4	3	3	6	4	0	2	17	9	0	3	18	27	14	14	5	0	8	0
chr11:120916382-120926017	120916382	120926017	0	1	0	0	0	0	0	0	0	0	0	1	0	0	0	0	0	0	0	0	0	0	0	0	3	0	0	1	0	0	8	0	2	8	3	3	0	0	0	1
chr11:120916382-120930794	120916382	120930794	1	2	0	3	2	0	1	1	0	1	0	2	2	0	0	0	0	0	1	1	1	1	3	0	7	9	0	4	5	4	1	8	15	24	55	15	6	5	4	6
chr11:130130750-130131824	130130750	130131824	6	0	0	6	2	1	2	3	3	2	1	3	3	1	4	6	0	7	5	2	4	5	1	5	4	2	1	5	4	0	0	1	11	2	5	2	1	0	5	0
chr11:16117541-16208501	16117541	16208501	0	0	0	0	0	0	0	0	0	0	0	0	1	0	0	0	2	0	0	0	2	1	2	2	3	1	1	4	0	7	0	0	5	17	11	13	8	4	19	0
chr11:17153462-17167489	17153462	17167489	0	1	0	0	0	0	0	0	2	0	0	0	0	1	0	2	0	0	0	0	0	0	0	0	0	0	0	0	0	0	0	0	9	9	5	2	3	0	0	0
chr11:2972488-3000467	5944976	6000934	4	3	5	2	2	2	0	2	0	1	1	3	2	3	1	1	1	2	0	1	1	2	2	2	3	5	7	4	8	18	0	7	0	17	18	9	3	0	19	16
chr11:2991032-3000467	2991032	3000467	0	2	2	0	0	0	0	0	1	0	0	0	0	0	0	0	0	0	0	0	0	2	1	0	0	2	1	1	0	5	0	2	3	12	11	5	0	0	0	0
chr11:33307958-33309057	66615916	66618114	12	7	5	9	3	4	6	6	3	8	6	2	3	4	9	9	1	8	6	5	5	4	3	9	4	6	0	5	17	13	0	22	33	13	30	17	25	0	10	1
chr11:34093272-34098189	68186544	68196378	0	1	1	0	2	1	0	1	1	0	0	1	0	1	0	1	0	2	0	0	1	0	0	1	4	4	0	4	7	0	20	5	5	10	7	7	5	0	2	0
chr11:34978930-34999729	34978930	34999729	1	0	1	2	0	1	0	1	0	0	0	0	0	0	0	0	1	1	3	2	2	2	2	1	1	2	0	1	2	8	4	0	15	18	7	2	7	0	0	0
chr11:3752620-3774638	3752620	3774638	1	0	2	0	0	0	0	0	0	1	1	0	1	0	1	0	0	1	0	0	1	0	1	3	1	0	1	4	1	0	0	0	4	12	13	13	1	10	0	15
chr11:3789810-3797251	3789810	3797251	0	0	0	0	1	0	1	1	0	0	0	0	1	0	1	0	1	0	1	0	0	1	0	0	4	1	0	1	4	3	0	0	6	11	9	4	10	2	0	0
chr11:46098304-46113774	46098304	46113774	0	1	0	4	0	1	0	0	0	1	0	0	1	2	0	0	1	1	1	3	0	1	2	0	4	6	3	2	9	9	0	6	4	33	0	32	11	0	6	0
chr11:46333875-46334470	92667750	92668940	0	0	0	0	0	0	0	0	0	0	0	0	0	0	0	0	0	0	0	0	0	1	1	1	5	2	2	0	6	0	0	0	4	6	5	15	0	5	0	0
chr11:61133516-61135470	122267032	122270940	1	1	2	1	0	1	2	2	2	2	1	3	4	2	1	1	2	2	0	5	2	2	3	1	3	1	0	2	4	4	0	0	7	24	7	4	15	0	0	0
chr11:62566010-62567958	125132020	125135916	0	0	0	0	0	0	0	0	0	0	0	0	0	0	0	0	0	0	0	0	0	0	0	0	0	2	2	0	11	0	0	0	7	3	3	10	8	0	4	0
chr11:62591637-62595103	62591637	62595103	0	0	0	0	0	0	0	0	0	0	0	0	0	0	0	0	0	0	0	1	0	0	0	0	0	0	1	1	0	0	0	0	4	4	6	4	0	0	0	7
chr11:63486173-63488504	63486173	63488504	0	0	0	0	0	0	0	0	0	0	0	0	0	0	0	0	0	0	0	0	0	0	1	0	0	0	0	1	0	0	0	0	6	2	17	11	4	0	1	0
chr11:74500670-74528759	74500670	74528759	1	1	0	0	0	0	1	1	0	0	0	0	1	0	0	0	0	0	0	0	1	0	1	1	0	1	0	0	1	0	0	0	7	5	11	3	1	0	8	4
chr11:76174864-76183884	76174864	76183884	0	1	1	0	0	0	0	0	1	1	0	2	0	1	0	0	1	0	2	0	2	2	0	0	1	1	3	2	5	0	0	0	8	8	16	7	5	9	6	7
chr11:77409531-77413540	154819062	154827080	0	2	0	0	2	0	0	0	0	0	1	1	1	0	0	1	2	1	0	3	0	2	0	1	0	4	0	3	4	3	12	3	12	17	16	2	4	2	15	0
chr11:82935896-82959129	82935896	82959129	0	0	0	0	0	0	0	0	0	0	0	0	0	0	0	0	0	0	0	0	0	0	0	0	1	3	2	1	1	15	5	3	3	31	5	13	12	0	11	0
chr11:85685750-85695016	171371500	171390032	1	0	2	2	0	1	1	0	4	1	0	2	2	1	2	3	2	3	0	2	3	0	2	1	0	1	0	0	0	7	0	0	7	7	15	6	0	10	13	0
chr11:85685750-85742653	85685750	85742653	0	0	0	0	0	0	0	2	0	0	3	1	3	2	3	0	5	2	5	1	5	4	3	4	8	13	5	10	8	6	7	7	10	28	33	28	6	0	9	2
chr11:85692171-85695016	171384342	171390032	0	0	0	0	1	0	1	0	0	0	1	0	0	0	1	2	3	0	1	2	0	0	0	0	1	1	1	2	0	2	0	0	10	15	30	10	0	6	2	0
chr11:85692171-85742653	85692171	85742653	2	1	0	0	1	0	0	0	1	0	0	1	2	0	1	2	1	3	2	2	2	6	1	4	2	8	4	7	4	7	20	2	8	33	18	12	8	16	28	7
chr11:85692787-85701442	85692787	85701442	0	0	0	0	0	1	0	0	0	1	0	0	0	0	0	0	0	0	0	1	0	0	1	2	2	6	1	2	3	20	0	0	12	51	32	24	13	5	3	0
chr11:85692787-85707972	85692787	85707972	2	0	0	0	0	0	2	2	0	1	0	0	1	2	0	2	3	3	0	1	4	1	0	0	0	2	0	0	2	0	0	2	4	27	9	6	0	9	0	0
chr11:85701292-85742653	85701292	85742653	1	1	1	0	1	0	0	0	1	0	1	0	6	3	1	2	1	3	4	1	1	6	0	2	4	3	2	0	1	2	0	11	20	39	29	3	12	0	11	0
chr11:85707868-85712201	85707868	85712201	0	0	0	1	0	1	0	0	0	0	0	1	3	0	0	0	0	0	0	3	0	0	2	2	6	5	2	2	7	0	0	0	1	8	11	6	0	0	2	13
chr11:85707868-85714494	85707868	85714494	3	1	0	4	0	3	2	0	1	6	2	5	3	7	4	3	10	15	5	5	8	8	7	6	10	21	10	22	33	11	0	2	31	91	105	106	63	10	40	16
chr11:85707868-85742653	85707868	85742653	0	2	6	1	2	2	1	1	0	1	1	4	4	2	4	2	7	12	14	2	9	9	8	13	6	20	4	14	17	25	0	13	52	103	159	44	78	10	41	20
chr11:85711685-85742653	85711685	85742653	0	1	0	0	0	0	0	0	0	1	0	0	0	0	0	1	0	0	0	0	0	0	1	0	1	6	0	1	4	0	0	0	15	7	19	4	2	0	3	0
chr11:85718584-85742653	171437168	171485306	2	3	1	0	3	2	1	0	3	4	0	2	2	8	0	7	7	7	8	5	4	6	7	8	12	14	7	3	4	49	8	23	58	74	115	35	57	15	18	12
chr11:85722072-85742653	85722072	85742653	1	0	0	0	2	2	1	1	1	1	0	2	3	0	0	1	2	2	3	5	0	2	6	3	2	12	0	2	2	7	1	16	43	39	45	21	10	0	18	0
chr11:85733409-85742653	171466818	171485306	3	1	0	2	4	0	3	5	2	2	3	2	6	0	1	1	4	3	5	4	0	2	3	1	1	5	0	1	3	29	18	4	20	18	17	4	10	0	2	7
chr12:1003727-1006847	1003727	1006847	0	0	0	0	0	0	0	0	1	0	0	0	0	0	0	1	1	0	0	0	0	2	1	0	2	1	0	1	5	0	0	0	8	7	10	7	5	4	3	0
chr12:100676720-100691953	100676720	100691953	1	0	5	1	0	1	1	0	0	3	1	0	4	0	0	0	1	1	1	1	0	1	1	2	3	10	1	2	2	4	6	6	17	17	11	10	21	0	6	0
chr12:102107867-102110590	102107867	102110590	1	0	0	0	0	0	0	0	0	0	0	1	1	0	0	1	2	0	0	1	0	0	1	0	1	2	2	0	0	0	0	0	9	8	9	3	0	0	1	0
chr12:107393328-107393860	214786656	214787720	0	0	0	0	0	0	0	0	0	0	0	0	0	0	0	0	0	0	0	0	1	0	0	1	2	1	1	3	3	4	0	0	9	3	3	11	0	0	0	0
chr12:108938914-108942990	217877828	217885980	0	0	0	0	0	0	0	0	0	0	0	0	0	0	0	0	0	0	0	0	0	0	0	0	2	2	0	3	7	3	0	0	3	18	12	13	6	6	0	0
chr12:109046047-109048186	218092094	218096372	5	8	6	6	5	5	9	0	9	1	5	6	3	2	0	6	2	2	2	8	8	9	5	7	18	17	8	31	28	31	6	22	21	58	62	103	31	0	46	6
chr12:109052513-109072170	109052513	109072170	0	0	0	0	0	0	0	0	0	0	0	0	0	0	0	0	0	0	0	0	0	0	0	0	0	2	1	1	0	0	0	0	10	19	6	9	0	0	0	0
chr12:109052513-109095099	109052513	109095099	0	0	0	0	0	0	0	0	0	0	0	0	0	0	0	0	0	0	0	0	0	0	0	0	0	6	0	5	5	5	0	17	14	16	3	10	0	5	4	0
chr12:109072047-109095099	109072047	109095099	0	0	0	0	0	0	0	0	0	0	0	0	0	0	0	1	0	0	0	0	0	0	0	0	3	4	0	5	1	1	0	0	4	13	2	10	0	0	0	0
chr12:109094899-109095099	218189798	218190198	1	0	0	0	0	0	0	0	0	0	0	0	0	0	0	0	0	0	0	0	0	0	0	1	1	6	1	1	8	12	0	1	4	12	9	11	0	7	0	6
chr12:111951160-111957880	111951160	111957880	0	0	1	0	0	0	0	0	0	1	0	0	0	0	0	0	0	0	1	0	0	1	0	0	2	2	3	0	0	0	0	0	3	7	8	4	0	0	0	0
chr12:111990083-111993723	223980166	223987446	8	5	5	4	7	2	3	1	4	1	1	2	2	1	0	1	0	0	2	0	1	0	1	3	0	0	0	1	3	7	0	11	10	4	8	7	2	0	2	0
chr12:112116954-112121111	112116954	112121111	1	0	0	0	1	0	0	0	0	0	0	0	0	0	1	0	0	2	0	1	1	0	0	0	1	1	0	2	2	0	0	0	17	12	6	3	4	1	0	0
chr12:112613539-112617201	225227078	225234402	0	0	0	0	0	0	0	0	0	0	0	0	0	1	0	0	0	0	0	1	0	1	0	0	3	1	0	0	4	0	0	5	4	4	13	13	4	6	3	0
chr12:112641439-112666615	112641439	112666615	0	0	1	1	0	0	0	0	0	0	0	0	1	0	1	1	1	1	0	0	2	5	3	3	20	21	5	13	19	20	17	8	3	18	25	11	3	0	7	0
chr12:112707507-112711599	225415014	225423198	0	0	0	0	0	0	0	0	0	0	0	0	0	0	0	0	0	0	0	0	1	2	0	0	2	3	1	1	5	4	0	0	14	32	10	11	12	0	4	0
chr12:112707507-112712764	112707507	112712764	0	0	0	0	0	0	1	0	0	0	0	0	0	0	0	0	0	0	0	0	0	0	0	0	0	0	0	1	0	0	0	0	2	3	9	5	0	0	0	0
chr12:112707507-112757546	112707507	112757546	1	0	0	0	0	0	0	0	0	0	0	0	0	0	0	0	0	0	0	0	0	0	0	0	9	36	6	16	18	31	19	12	13	38	15	22	17	8	10	0
chr12:112743867-112757546	112743867	112757546	0	0	0	0	0	0	1	1	1	0	0	1	0	0	2	0	0	2	1	2	0	1	0	1	14	10	5	19	8	6	11	5	3	39	39	34	17	7	8	0
chr12:112752260-112757546	225504520	225515092	0	0	0	0	0	0	0	0	0	0	0	0	0	0	0	0	0	0	0	0	0	1	0	0	2	4	3	5	4	3	0	0	5	27	10	9	2	15	14	11
chr12:112757028-112757546	112757028	112757546	0	1	0	1	0	1	1	0	0	1	1	1	1	0	0	2	1	0	1	0	1	4	3	1	7	8	6	2	12	7	0	0	3	29	14	24	0	1	1	0
chr12:120592773-120593523	120592773	120593523	2	4	6	2	2	2	3	2	2	2	0	3	2	4	0	3	1	0	3	1	0	0	0	0	0	0	0	1	0	0	0	0	0	4	0	1	0	0	0	0
chr12:120995084-120995485	241990168	241990970	0	0	1	0	0	0	0	0	0	0	0	0	1	0	0	0	2	0	0	0	6	2	3	3	6	12	3	14	15	8	0	1	20	43	13	24	0	0	9	0
chr12:120995084-120998689	120995084	120998689	0	0	0	0	0	1	0	0	0	1	2	0	0	0	1	0	0	1	0	0	2	0	2	0	4	2	1	4	5	2	0	6	6	8	21	13	18	0	5	0
chr12:120995084-121004783	120995084	121004783	0	0	0	0	0	0	0	0	0	0	0	0	0	0	0	0	0	0	0	0	0	0	0	0	1	1	0	0	0	2	0	0	3	11	4	2	4	0	12	0
chr12:120998528-121001746	120998528	121001746	0	0	0	0	0	0	0	0	0	0	0	0	0	0	0	0	0	0	0	0	0	0	0	0	0	5	4	1	3	0	0	0	3	15	5	5	1	0	0	0
chr12:121000747-121001746	242001494	242003492	0	0	0	0	0	0	1	0	0	0	0	0	0	0	0	0	0	0	1	0	3	0	2	4	27	11	17	6	23	22	9	5	42	84	141	118	6	20	34	13
chr12:121000747-121004783	121000747	121004783	0	0	0	0	0	0	0	0	0	0	0	0	0	0	0	0	0	0	0	0	0	0	0	0	0	1	0	3	0	0	0	0	2	5	6	4	0	0	4	0
chr12:121002874-121004783	121002874	121004783	0	0	0	0	0	0	0	0	0	0	0	0	0	0	0	0	0	0	0	0	0	0	0	2	1	4	3	3	9	1	0	0	10	16	12	23	0	0	9	0
chr12:121220457-121222396	121220457	121222396	1	0	0	0	0	0	1	2	0	0	0	0	1	0	1	0	1	1	1	0	1	0	0	3	0	5	1	2	10	7	0	0	18	27	11	22	4	0	0	0
chr12:122861935-122865105	122861935	122865105	0	0	0	0	0	0	0	0	0	0	0	0	0	1	0	0	1	1	0	0	0	1	0	0	10	1	0	1	4	2	5	0	11	2	4	2	2	0	5	0
chr12:122973932-122977336	122973932	122977336	0	0	0	0	0	0	0	0	0	0	0	0	0	0	0	0	0	0	0	0	2	0	0	2	0	0	0	3	2	0	0	6	4	9	17	3	0	0	0	0
chr12:123001773-123006846	123001773	123006846	0	0	0	0	0	0	0	0	0	0	0	0	0	0	0	0	0	0	0	0	0	0	1	0	0	0	0	0	0	0	0	0	3	3	9	8	0	0	0	0
chr12:124071293-124074996	248142586	248149992	1	1	3	1	2	4	1	3	0	1	2	1	5	1	2	3	2	2	2	1	3	2	3	1	3	10	2	8	8	11	13	2	18	24	18	35	7	17	16	10
chr12:27107077-27110676	27107077	27110676	1	0	0	0	0	0	0	0	0	0	0	1	0	0	0	0	0	0	0	0	1	0	1	1	4	0	1	1	4	5	0	0	11	16	5	5	0	0	4	3
chr12:28408513-28412375	28408513	28412375	0	3	0	1	0	1	1	0	0	1	0	0	0	2	0	1	3	1	2	1	3	2	3	1	0	1	0	3	6	0	0	0	5	9	18	3	4	0	4	0
chr12:42748962-42792796	42748962	42792796	0	0	0	0	0	0	0	2	0	0	1	1	0	0	0	0	1	1	0	0	0	0	0	0	0	2	0	1	3	1	0	1	9	16	8	14	1	0	7	9
chr12:459786-475270	459786	475270	0	1	0	1	1	0	0	0	0	1	0	0	0	1	0	0	0	0	1	1	1	3	0	0	0	0	0	1	0	2	0	0	4	5	6	5	3	0	4	0
chr12:46760646-46765162	46760646	46765162	0	0	0	0	0	0	0	0	0	0	0	0	0	0	0	0	0	0	0	0	0	0	0	0	2	0	1	1	3	0	0	0	7	11	7	11	2	0	5	0
chr12:56997142-56999111	113994284	113998222	0	0	1	0	0	0	0	0	0	1	0	0	0	0	0	0	1	3	2	0	8	4	5	4	34	22	30	32	43	25	21	8	50	65	99	71	21	10	22	1
chr12:56998000-56999111	113996000	113998222	0	0	0	0	0	0	0	0	0	0	0	0	0	0	0	0	0	0	2	0	5	1	3	3	8	4	3	5	10	0	1	0	0	17	38	19	14	4	0	0
chr12:57059987-57066849	57059987	57066849	0	0	0	1	0	0	1	1	2	0	0	1	0	0	0	0	1	0	0	0	1	0	0	0	0	3	2	2	1	0	0	3	5	4	2	3	0	7	3	0
chr12:57065532-57066849	114131064	114133698	0	1	1	0	0	0	0	0	1	1	0	0	0	0	1	0	2	1	0	0	3	2	3	1	8	0	0	2	14	6	11	6	5	11	10	9	0	0	0	0
chr12:62687959-62715390	62687959	62715390	0	0	0	0	0	0	0	0	0	0	0	0	0	0	0	0	0	0	0	0	0	0	1	0	0	1	0	1	1	0	0	0	8	15	12	3	8	0	0	0
chr12:62696570-62719714	62696570	62719714	0	0	0	0	0	0	0	0	0	0	0	0	0	0	0	0	0	0	0	0	0	0	0	1	1	1	0	0	1	0	0	0	4	2	5	2	1	0	1	0
chr12:62708570-62749256	62708570	62749256	0	0	0	0	0	0	0	0	0	0	2	0	0	0	0	0	2	0	0	1	0	0	1	0	0	0	0	0	1	0	12	0	20	4	12	7	1	0	0	0
chr12:6696549-6697115	6696549	6697115	0	0	0	0	0	0	0	0	0	0	0	0	0	0	0	0	0	0	0	0	0	0	0	0	4	1	1	0	2	0	0	0	8	2	3	3	12	4	0	0
chr12:6696549-6697588	13393098	13395176	0	0	0	0	0	0	0	0	0	0	0	0	0	0	0	0	0	0	0	0	0	0	0	0	0	0	2	2	6	0	0	0	9	4	2	8	3	0	8	0
chr12:69222550-69230529	138445100	138461058	0	0	0	2	0	0	1	0	0	0	0	1	0	0	0	0	1	4	2	2	0	0	1	0	0	0	0	2	0	5	10	1	5	16	14	6	0	0	0	9
chr12:69644908-69656342	139289816	139312684	4	7	4	0	0	1	1	1	5	2	1	3	3	3	1	3	5	3	0	1	3	3	8	8	12	16	3	6	14	10	1	0	5	10	13	10	2	11	10	0
chr12:69983264-69985939	69983264	69985939	1	2	1	0	1	2	3	0	0	2	1	0	2	1	0	0	3	0	1	0	1	0	3	2	2	2	0	2	4	10	0	0	4	19	7	11	8	0	0	0
chr12:69983264-69987393	69983264	69987393	0	0	1	1	0	2	2	5	2	1	1	0	2	1	1	0	3	1	0	1	0	5	1	1	0	6	0	0	0	6	0	0	9	13	10	18	1	6	2	0
chr12:70193988-70195501	70193988	70195501	5	1	1	2	1	2	1	1	3	2	5	4	6	3	0	3	8	6	5	5	3	4	0	2	9	9	3	2	10	6	13	0	16	14	6	8	4	1	0	0
chr12:70671911-70704797	70671911	70704797	0	0	0	0	0	0	1	0	0	0	0	0	1	0	0	0	0	1	0	0	0	0	0	0	0	5	5	2	4	1	0	0	2	3	11	3	0	0	7	0
chr12:72020039-72022817	72020039	72022817	1	1	0	0	2	0	1	0	0	0	0	1	0	0	1	1	0	2	0	0	2	2	0	3	2	4	0	3	2	5	22	0	19	58	40	2	12	0	4	0
chr12:72036215-72041593	72036215	72041593	1	1	0	0	0	0	1	1	1	0	0	0	0	1	0	0	0	0	0	2	1	0	0	0	0	0	0	0	0	0	2	2	3	8	6	2	1	0	0	0
chr12:89860546-89891119	89860546	89891119	0	0	0	0	0	0	0	0	0	0	0	0	0	0	0	0	0	0	0	0	0	0	0	0	1	0	2	1	6	4	0	0	12	22	7	11	5	0	0	0
chr12:90021454-90029028	180042908	180058056	0	0	0	0	0	0	0	0	0	0	0	0	0	0	0	1	0	0	0	0	1	0	0	1	0	0	0	0	2	3	0	1	3	4	4	4	1	1	5	0
chr12:922807-939326	922807	939326	0	0	0	0	0	0	1	0	0	0	0	0	1	1	0	0	0	0	2	0	2	0	1	1	6	6	2	12	2	28	0	7	13	34	21	19	6	7	5	0
chr12:936207-939326	936207	939326	0	0	0	0	1	0	0	0	0	0	0	0	0	0	0	0	0	0	1	0	1	0	1	0	0	2	0	4	4	0	0	0	10	2	4	9	2	0	0	0
chr12:93788384-93789309	187576768	187578618	0	0	0	1	0	0	0	0	0	0	0	0	0	0	1	0	1	1	0	2	8	3	4	1	18	9	4	14	27	13	0	1	5	15	14	40	4	0	8	0
chr13:113960799-113964177	113960799	113964177	0	0	0	1	0	0	0	0	0	0	0	0	0	0	0	0	0	0	0	0	0	0	0	0	3	1	1	0	14	0	2	0	13	21	19	20	12	0	5	1
chr13:113963957-113964177	113963957	113964177	0	0	0	0	0	0	0	0	0	0	0	0	0	0	0	0	0	0	0	0	1	1	0	0	1	2	0	1	11	21	0	13	23	29	10	15	10	8	8	0
chr13:20425494-20426330	20425494	20426330	1	0	1	0	0	0	0	1	0	0	0	0	0	0	0	1	2	2	0	0	0	0	1	1	0	0	0	1	1	0	0	0	5	4	4	3	0	0	0	12
chr13:21735928-21746820	21735928	21746820	1	0	1	1	0	0	0	0	0	0	0	0	0	0	0	0	1	0	0	0	0	0	1	2	0	1	0	0	4	0	0	0	4	9	18	3	0	0	0	0
chr13:21742126-21742538	43484252	43485076	2	4	3	7	2	0	2	3	1	1	0	0	3	3	2	2	2	5	3	1	0	3	3	2	0	1	0	2	2	3	0	3	7	44	24	10	4	0	4	14
chr13:26911703-26928017	26911703	26928017	1	0	0	0	0	0	0	1	0	0	1	0	1	0	0	0	0	0	2	0	0	0	0	3	0	5	1	1	0	0	0	0	4	2	2	4	6	0	0	0
chr13:26974589-26975761	26974589	26975761	1	2	1	1	0	0	1	0	0	0	1	0	1	0	1	0	1	1	1	0	1	2	0	2	0	1	1	4	1	1	0	0	6	6	11	9	0	0	5	0
chr13:27664019-27690733	27664019	27690733	1	0	0	0	0	1	0	0	0	0	0	1	0	0	0	0	1	0	3	0	0	0	1	2	2	4	0	3	4	5	0	5	9	12	16	5	4	5	1	0
chr13:33091993-33101669	66183986	66203338	4	5	4	6	3	2	0	0	4	3	6	1	4	7	7	2	9	3	10	5	15	10	20	15	10	23	10	17	20	69	4	18	67	93	101	63	61	18	81	5
chr13:41515056-41518061	41515056	41518061	1	1	1	1	1	2	0	0	0	0	0	0	0	0	0	0	0	0	0	0	1	0	0	0	6	1	0	1	4	2	0	0	17	5	8	10	7	4	7	0
chr13:46577273-46594692	93154546	93189384	1	1	0	0	0	2	0	1	0	0	0	0	0	3	0	0	1	1	1	0	1	2	0	1	1	0	0	2	1	11	0	0	18	4	18	3	4	0	5	0
chr13:51941940-51953708	51941940	51953708	0	0	0	0	0	0	0	0	0	0	0	0	0	0	0	0	1	0	0	0	0	0	0	0	1	0	0	0	1	0	5	0	6	9	10	5	5	0	6	0
chr13:76134888-76143643	76134888	76143643	1	0	3	0	0	0	3	0	2	0	1	0	1	1	1	0	1	0	0	0	0	0	1	0	2	3	0	0	2	0	0	0	6	2	14	3	10	0	0	0
chr13:95686858-95705438	191373716	191410876	0	0	1	1	1	0	0	0	0	0	0	0	0	0	0	0	0	0	1	1	0	2	2	1	5	2	0	3	0	0	0	5	15	14	4	16	14	5	5	0
chr13:95686858-95715113	95686858	95715113	0	2	1	1	0	0	0	0	0	0	0	0	1	0	0	0	1	0	0	0	0	0	1	1	0	1	0	0	4	0	0	0	3	2	5	2	0	4	3	0
chr13:95686858-95735544	95686858	95735544	0	0	0	1	0	0	0	0	0	0	0	0	0	0	0	0	0	1	1	0	0	0	0	1	2	2	2	0	2	4	0	0	2	6	7	2	0	0	6	0
chr13:95768175-95840796	95768175	95840796	1	3	1	2	0	1	2	1	0	0	2	1	0	0	0	2	2	2	4	3	2	2	3	6	4	11	0	1	6	10	0	4	17	13	0	0	0	0	0	0
chr13:96409897-96416207	192819794	192832414	2	3	3	3	1	1	0	0	1	1	0	1	1	0	0	1	1	0	0	0	0	1	0	2	0	1	0	0	2	0	0	0	0	0	7	0	0	0	0	0
chr13:96636057-96651561	96636057	96651561	2	0	3	0	0	0	1	0	0	0	0	0	0	0	1	0	0	0	0	0	0	0	1	1	1	0	0	1	4	6	11	5	10	2	10	3	8	0	0	18
chr13:97927885-97928663	97927885	97928663	0	0	0	0	0	0	0	0	0	0	0	0	0	0	0	0	0	0	0	0	0	0	1	0	3	1	0	5	3	5	30	0	5	15	12	3	0	0	0	0
chr13:99890680-99896878	99890680	99896878	0	2	1	3	0	2	2	5	1	3	2	2	2	0	7	2	2	0	6	0	2	0	1	1	0	0	0	5	3	3	0	0	14	21	5	14	8	0	26	8
chr14:102506572-102509085	102506572	102509085	0	0	0	0	0	0	0	0	1	0	0	0	0	0	0	0	0	0	0	0	1	0	0	1	4	1	1	1	6	0	0	0	7	3	2	5	9	0	0	0
chr14:103803013-103806140	103803013	103806140	0	0	0	0	0	0	0	0	0	1	0	0	0	0	1	0	0	0	1	0	0	0	0	2	3	8	3	8	8	9	0	12	48	49	29	15	9	12	19	0
chr14:103804663-103806140	207609326	207612280	0	0	0	0	0	0	0	0	0	0	0	0	0	0	0	0	0	0	0	0	0	0	0	0	1	3	0	2	4	14	18	0	13	5	14	12	8	0	0	0
chr14:21698477-21702388	21698477	21702388	6	1	2	1	2	3	0	1	1	1	2	2	1	2	0	1	0	2	3	2	0	0	1	0	2	7	4	9	18	4	0	5	21	53	1	27	5	0	10	14
chr14:21971315-21972024	21971315	21972024	4	2	1	2	4	0	1	2	0	1	2	0	1	1	2	3	0	0	2	0	0	0	1	0	0	2	2	4	3	0	0	0	3	4	21	11	2	0	0	0
chr14:23378691-23380612	23378691	23380612	3	3	2	0	0	0	1	0	1	0	3	1	0	2	1	2	5	2	3	3	2	6	4	2	1	1	2	4	7	3	0	0	3	4	0	3	0	0	7	0
chr14:31371741-31380368	31371741	31380368	0	0	0	0	0	0	1	0	0	0	0	0	0	0	1	0	1	0	1	0	0	0	1	0	0	2	0	0	4	2	0	0	6	9	22	6	10	4	0	0
chr14:31404368-31425448	62808736	62850896	1	0	0	1	2	0	0	2	4	1	0	0	1	1	0	1	1	2	2	2	4	2	1	2	2	5	1	3	7	3	6	6	16	11	43	22	13	1	16	6
chr14:39648294-39648666	39648294	39648666	3	3	3	5	2	0	2	0	2	3	1	1	3	5	2	4	2	6	2	2	0	3	0	1	0	2	0	8	4	7	5	2	20	20	3	10	2	0	12	0
chr14:39746137-39748741	39746137	39748741	3	4	0	0	0	0	0	0	0	1	0	0	1	0	0	0	0	0	0	0	0	1	0	0	5	0	0	0	1	1	0	0	15	2	6	3	0	0	0	0
chr14:45715945-45716580	45715945	45716580	0	0	0	0	0	0	0	1	0	0	0	0	0	0	0	0	0	0	0	0	0	2	0	0	2	1	0	0	0	3	0	0	6	4	3	3	0	0	0	0
chr14:50130032-50141145	50130032	50141145	3	3	1	2	3	2	0	1	2	3	6	1	2	2	2	2	1	5	4	1	0	1	0	1	1	1	0	1	2	7	10	9	1	9	7	11	1	0	0	6
chr14:50292584-50298079	50292584	50298079	0	0	0	0	1	2	0	0	0	0	1	0	0	0	0	0	0	1	0	0	0	0	0	2	3	0	2	0	2	6	9	5	13	24	15	4	5	0	9	0
chr14:50909449-50915550	50909449	50915550	0	0	0	0	0	0	0	0	0	0	0	0	0	0	0	0	0	0	0	0	0	0	0	0	2	0	0	2	0	0	2	3	3	16	10	5	0	0	5	0
chr14:50933300-50943024	101866600	101886048	0	0	0	0	0	0	0	0	0	0	0	0	0	0	0	0	0	0	0	0	0	0	2	0	0	2	0	0	0	0	0	0	13	22	9	4	0	1	6	0
chr14:53003436-53011089	53003436	53011089	1	0	1	1	0	0	0	0	2	0	0	1	1	2	1	1	2	0	1	1	0	3	3	1	6	0	1	2	3	3	26	11	23	27	19	5	12	1	3	13
chr14:53558502-53570574	53558502	53570574	0	1	0	0	1	0	0	1	0	0	0	0	0	0	0	0	1	2	2	0	3	0	0	0	0	3	2	0	6	4	0	0	10	31	9	3	3	1	5	0
chr14:56078736-56086030	56078736	56086030	1	4	2	3	1	2	3	3	0	0	1	0	0	0	1	0	0	0	0	0	0	3	4	2	0	1	0	0	0	2	0	10	16	4	9	7	1	0	1	0
chr14:58785259-58790335	117570518	117580670	0	0	0	0	0	0	0	0	0	1	0	0	0	0	0	0	0	0	0	0	0	0	0	0	0	2	0	4	1	6	0	0	6	10	18	10	0	0	0	0
chr14:58785259-58796887	58785259	58796887	0	1	1	0	1	0	0	0	2	0	0	0	2	0	0	0	1	0	1	0	1	0	1	1	1	2	1	2	4	7	20	17	13	11	33	6	6	0	0	0
chr14:67736417-67770316	135472834	135540632	0	1	1	0	0	0	0	0	0	0	0	0	0	0	0	0	0	0	2	0	0	1	0	1	4	1	0	0	4	0	7	0	3	7	5	2	2	0	0	0
chr14:73181130-73198642	73181130	73198642	1	0	0	0	1	0	0	0	0	0	2	0	4	0	0	0	1	0	1	1	1	1	4	3	5	8	2	4	2	4	0	0	7	5	16	12	7	0	11	5
chr14:74495886-74512833	74495886	74512833	0	0	0	0	0	0	0	0	0	0	0	0	0	0	0	0	0	1	0	0	1	0	0	0	0	0	1	2	5	0	0	0	8	8	6	11	0	0	0	0
chr14:75136351-75138186	75136351	75138186	0	1	0	1	0	0	0	0	0	0	0	0	0	0	0	1	1	0	0	0	1	1	0	0	2	4	2	1	0	1	0	0	6	11	5	3	0	0	10	0
chr14:93760203-93762503	93760203	93762503	4	2	2	2	1	0	1	0	0	1	0	0	0	0	1	0	0	0	0	0	0	0	0	0	0	0	0	0	3	0	2	0	5	1	5	2	6	0	0	0
chr14:96807858-96813678	96807858	96813678	1	1	0	1	0	0	0	0	0	0	1	0	0	0	0	1	0	0	0	0	1	0	1	1	3	1	4	9	9	4	0	3	2	6	15	18	22	0	5	5
chr14:97299803-97327072	194599606	194654144	19	11	10	10	6	13	9	5	13	8	6	4	9	4	11	12	9	20	12	9	3	10	13	16	4	33	5	23	13	69	33	30	34	69	115	58	33	30	21	58
chr14:99924615-99932150	199849230	199864300	6	3	6	5	7	3	3	4	8	5	3	6	10	4	3	7	8	5	4	5	3	6	4	5	4	12	1	3	10	12	0	4	27	58	30	25	6	12	7	0
chr15:101104896-101105470	202209792	202210940	2	3	3	1	1	2	3	2	2	5	1	2	0	2	2	1	3	3	7	1	4	9	3	3	0	1	1	0	3	5	9	4	10	21	15	4	0	0	1	0
chr15:23333848-23339028	23333848	23339028	0	0	0	0	0	0	0	0	0	0	0	0	0	0	0	0	0	0	0	0	0	0	1	0	0	2	0	1	0	0	0	0	2	4	11	3	0	0	0	0
chr15:23333848-23356220	23333848	23356220	0	0	0	0	0	0	0	0	0	0	0	0	0	0	0	0	0	0	0	0	0	1	0	0	0	2	0	0	0	0	0	6	4	7	7	2	0	0	5	0
chr15:25650607-25657118	25650607	25657118	4	1	7	5	0	1	5	1	4	2	1	6	1	1	2	4	1	5	8	3	3	6	2	6	0	6	3	3	6	10	10	2	13	17	16	14	5	0	2	0
chr15:32819013-32825569	32819013	32825569	1	3	1	0	0	2	3	1	2	3	1	2	0	1	1	2	1	2	0	2	1	5	2	0	1	7	1	0	3	44	27	8	18	54	29	0	16	1	0	4
chr15:41648236-41669502	41648236	41669502	0	0	0	1	1	0	0	0	2	0	0	2	4	1	0	3	5	5	5	3	4	5	6	1	4	4	2	3	19	17	1	15	6	17	39	10	6	12	6	0
chr15:41667909-41669502	41667909	41669502	0	0	2	0	0	0	0	0	0	1	0	0	0	2	3	1	0	1	0	2	1	4	7	5	1	2	1	1	0	13	0	0	9	7	9	6	3	0	10	0
chr15:41961025-41962156	41961025	41962156	5	4	7	7	4	3	1	7	5	1	2	2	2	3	3	1	5	4	0	0	3	1	2	2	5	4	0	5	3	1	12	1	14	9	28	4	2	1	0	0
chr15:44843073-44846865	89686146	89693730	0	0	0	0	0	0	0	0	0	0	0	0	0	0	0	0	0	0	0	0	3	0	0	1	0	0	0	0	3	9	0	8	5	11	3	5	0	0	0	8
chr15:50875285-50884823	50875285	50884823	0	0	1	3	0	1	0	0	1	1	0	1	1	0	0	0	3	1	1	0	0	3	0	0	2	4	0	1	4	4	0	0	15	11	25	2	1	0	0	0
chr15:52876941-52970319	52876941	52970319	0	0	0	0	0	0	0	0	0	0	0	0	0	0	0	0	0	0	0	0	0	0	0	0	3	1	0	0	2	0	0	0	8	7	8	4	0	0	0	0
chr15:59204761-59209198	118409522	118418396	3	4	5	5	3	7	3	6	11	6	2	10	3	0	6	5	3	9	10	8	9	4	16	5	5	17	0	6	7	47	13	48	68	52	43	42	14	7	9	5
chr15:63915013-63916526	63915013	63916526	0	0	0	0	0	0	0	0	0	1	0	0	0	0	0	0	0	0	0	0	0	2	1	0	0	7	6	4	0	0	0	0	7	21	3	3	0	0	5	0
chr15:63988322-64008672	127976644	128017344	3	1	1	2	2	2	2	1	1	1	0	1	2	6	3	3	6	8	3	4	18	15	18	14	61	55	21	48	68	57	55	23	34	162	132	71	28	36	50	11
chr15:63998978-64008672	127997956	128017344	0	1	0	0	1	1	1	0	0	0	0	0	0	1	0	2	0	1	1	2	5	2	5	2	9	6	3	4	11	6	13	2	10	14	28	8	11	7	10	15
chr15:65471271-65472542	65471271	65472542	0	0	0	0	0	0	0	0	0	0	0	2	1	0	0	0	0	2	3	0	4	1	1	0	1	2	0	5	4	14	0	8	5	14	12	12	4	0	4	0
chr15:65959786-65962526	65959786	65962526	0	0	0	1	0	0	0	1	0	0	0	0	0	0	0	0	0	1	0	1	0	1	4	1	2	12	4	1	2	0	10	0	7	19	28	14	5	0	7	0
chr15:65992881-65994228	65992881	65994228	0	0	0	0	1	0	0	0	1	0	0	0	0	0	0	1	0	0	1	1	0	0	2	1	0	0	0	2	3	3	0	2	3	14	21	4	6	0	7	0
chr15:65994099-65995346	65994099	65995346	0	0	0	0	0	0	0	0	0	0	0	0	0	1	0	0	0	0	0	0	0	2	0	0	0	1	0	0	0	0	0	0	4	8	5	3	0	0	0	0
chr15:65994642-65995346	65994642	65995346	0	0	0	0	0	0	0	0	0	0	0	0	0	0	0	2	1	1	0	0	0	0	1	1	0	3	0	3	2	18	0	3	29	16	17	25	3	0	11	2
chr15:65998428-66031213	65998428	66031213	0	0	0	0	0	0	0	0	0	0	0	0	0	0	0	0	0	0	0	0	0	0	0	1	0	7	2	1	6	3	0	0	11	4	20	8	1	2	2	5
chr15:66007815-66031213	132015630	132062426	0	0	1	0	0	0	0	0	0	0	0	0	0	0	2	1	2	1	3	0	5	4	10	1	2	14	7	4	18	17	15	19	47	86	63	15	8	0	15	11
chr15:66007815-66048810	66007815	66048810	0	0	0	0	0	1	0	0	2	0	0	1	1	0	2	2	0	2	1	0	3	5	5	2	7	20	2	7	9	27	9	6	13	42	22	15	12	12	14	9
chr15:66007815-66053776	66007815	66053776	0	0	0	1	0	0	0	0	0	0	0	0	1	1	2	2	1	0	2	1	3	7	6	3	8	17	6	5	9	25	5	8	25	15	47	15	10	0	6	0
chr15:66015185-66031213	66015185	66031213	0	0	0	0	0	0	0	0	1	0	0	0	0	0	0	1	0	0	0	0	0	1	0	2	0	5	0	0	0	3	0	0	8	11	4	3	11	0	4	0
chr15:66021409-66025156	66021409	66025156	0	0	0	0	0	0	0	0	0	0	0	0	0	1	0	0	0	0	0	0	0	0	0	2	6	0	1	1	5	0	0	9	21	15	11	2	9	2	1	0
chr15:66021409-66031213	66021409	66031213	0	2	0	1	0	0	0	0	1	0	0	2	3	3	2	2	3	3	2	4	5	2	4	2	13	15	1	5	12	24	0	10	62	106	76	21	36	1	7	11
chr15:66021409-66048810	132042818	132097620	0	0	0	0	0	0	0	3	0	0	2	0	2	2	1	2	3	6	4	2	2	4	4	3	1	16	4	3	9	19	28	2	22	26	59	10	10	0	10	0
chr15:66021409-66053776	66021409	66053776	0	0	0	0	0	0	0	0	1	0	0	0	0	0	0	0	0	1	0	0	0	1	2	0	4	6	2	3	4	2	5	4	4	16	7	0	0	2	0	12
chr15:66030044-66031213	66030044	66031213	0	0	0	0	0	0	0	0	0	0	0	0	0	0	0	0	0	0	0	0	0	1	3	0	3	2	0	0	1	7	11	1	21	21	11	3	0	0	0	1
chr15:66044716-66048810	132089432	132097620	0	0	0	0	0	0	0	1	0	0	0	0	0	1	0	0	1	2	1	0	1	0	4	3	8	7	6	7	13	18	32	15	18	25	50	42	8	1	50	16
chr15:66044716-66053776	132089432	132107552	2	2	0	3	4	1	3	0	3	2	1	2	5	0	2	3	8	7	7	1	7	6	9	7	16	14	7	8	13	27	12	0	78	72	58	16	33	14	42	7
chr15:66048477-66048810	66048477	66048810	0	0	0	0	0	0	0	0	0	0	0	0	0	0	0	0	1	0	0	0	3	1	0	2	0	2	0	0	3	3	13	2	5	8	17	9	0	0	6	0
chr15:66048477-66053776	66048477	66053776	0	0	0	0	0	0	0	0	2	1	0	0	0	0	0	0	1	0	0	0	1	1	2	0	2	7	0	0	8	5	0	0	10	43	20	17	0	5	8	0
chr15:69713985-69715668	69713985	69715668	0	0	0	0	1	0	0	0	0	0	0	0	0	0	0	0	0	0	1	0	0	0	1	0	0	0	0	0	0	0	0	7	4	4	2	3	0	0	0	0
chr15:76152218-76165909	76152218	76165909	0	2	1	0	1	0	0	0	0	0	0	0	1	0	1	3	0	0	1	0	0	0	3	1	0	3	1	0	3	5	10	7	5	4	0	5	0	0	6	0
chr15:79178482-79186572	79178482	79186572	0	0	0	0	0	0	0	0	0	0	0	0	0	0	0	0	0	0	0	0	0	1	1	0	0	0	0	2	6	1	0	0	8	8	14	3	0	2	10	6
chr15:79178482-79187246	79178482	79187246	0	0	0	0	0	0	0	0	0	0	0	0	0	0	0	0	0	0	0	1	1	0	0	0	0	0	0	0	0	0	0	1	4	4	9	2	7	0	2	0
chr15:79183330-79186572	79183330	79186572	0	0	0	0	0	0	0	0	0	0	0	0	0	0	0	0	0	0	0	0	0	0	1	0	2	0	0	0	1	0	0	0	7	4	4	2	0	2	7	0
chr15:80412669-80415142	160825338	160830284	3	2	1	2	5	1	2	1	1	0	2	1	2	2	1	2	1	5	5	5	8	2	6	2	6	10	2	7	27	12	10	8	53	59	51	51	29	12	10	20
chr15:89656955-89659752	89656955	89659752	3	2	4	5	0	2	3	3	3	1	1	0	2	5	5	1	3	2	2	1	4	2	3	2	2	3	1	3	2	0	0	0	8	9	4	20	3	0	3	0
chr15:93467550-93472321	186935100	186944642	0	0	1	0	1	0	0	0	0	1	0	1	2	0	1	1	0	0	0	0	2	3	0	2	2	2	2	5	5	5	0	4	11	14	8	13	6	9	18	0
chr15:93489050-93510743	93489050	93510743	0	0	0	0	0	0	0	0	0	0	0	0	0	0	0	1	0	1	0	0	1	1	1	0	3	1	0	1	0	0	0	6	6	12	4	5	7	0	0	12
chr15:93540186-93541851	187080372	187083702	0	0	0	0	0	0	0	1	0	0	0	0	0	0	1	2	1	1	0	1	3	2	3	2	18	12	5	15	13	3	0	17	35	26	28	53	22	8	19	0
chr15:93540186-93545547	187080372	187091094	1	1	1	4	1	0	2	3	1	1	1	3	1	0	0	0	3	1	2	3	10	4	5	3	31	21	5	23	29	45	39	26	81	106	116	86	67	10	27	0
chr15:93543741-93552553	187087482	187105106	1	0	0	0	0	0	0	0	1	0	1	0	0	0	1	0	0	1	1	0	1	0	1	3	7	4	2	3	6	0	0	0	10	25	16	17	13	0	16	2
chr15:93543741-93558139	187087482	187116278	1	1	0	0	0	0	0	1	0	0	0	0	0	0	0	0	0	1	0	0	1	1	2	2	5	7	3	4	9	0	3	0	17	20	11	14	19	5	16	5
chr16:15714307-15716980	15714307	15716980	0	0	0	0	0	0	0	0	0	0	0	0	0	0	0	0	0	0	0	0	0	0	1	0	0	2	1	0	5	0	0	0	5	5	3	2	1	0	0	0
chr16:15973660-15978062	15973660	15978062	0	0	0	1	0	0	0	0	0	1	0	0	0	1	2	0	0	0	0	0	1	0	2	0	2	0	1	0	0	1	0	0	8	2	18	7	0	0	0	0
chr16:1859238-1859834	1859238	1859834	1	2	0	2	0	1	0	0	1	0	0	1	0	3	1	2	5	3	7	1	8	1	8	7	3	5	2	4	19	0	0	0	7	11	3	27	9	0	2	0
chr16:18809246-18810156	18809246	18810156	0	0	0	0	2	0	0	0	0	1	1	0	0	2	0	2	0	3	1	2	0	1	0	1	0	3	1	0	0	0	0	0	8	4	3	4	0	0	0	0
chr16:18851019-18853776	18851019	18853776	0	0	0	0	0	0	0	0	0	0	0	0	0	0	0	0	0	0	0	0	0	1	0	1	4	4	0	2	3	1	0	0	3	7	22	11	0	0	1	0
chr16:18852886-18856973	37705772	37713946	0	1	0	3	0	0	0	0	0	0	2	0	0	0	0	4	1	3	2	0	5	0	2	1	2	2	0	5	12	1	0	7	21	66	25	24	20	1	23	9
chr16:21973780-21987564	21973780	21987564	0	0	1	0	0	0	0	1	0	0	1	0	0	1	1	0	0	0	0	1	1	0	0	0	2	1	0	2	7	0	0	0	2	8	9	8	0	0	0	0
chr16:2806334-2807946	5612668	5615892	0	0	0	1	0	0	0	0	0	0	0	0	0	0	0	0	0	0	0	1	0	0	0	0	1	2	0	0	4	6	0	0	3	10	17	10	4	0	1	0
chr16:30675535-30677862	61351070	61355724	4	0	2	1	0	0	0	0	0	0	0	3	3	2	1	0	4	4	3	0	3	4	3	5	20	9	5	12	12	0	0	0	4	19	11	13	2	0	0	0
chr16:30740286-30740893	30740286	30740893	2	1	1	1	2	2	2	0	3	1	1	0	2	0	0	0	1	1	2	2	5	2	4	3	5	1	4	8	7	3	0	0	6	7	19	12	0	0	0	0
chr16:3799627-3820987	3799627	3820987	0	0	0	0	0	0	0	0	0	0	0	0	0	1	0	1	0	0	1	2	0	2	1	2	5	6	2	3	5	0	0	0	3	2	4	2	5	1	2	0
chr16:3900297-3901010	3900297	3901010	3	1	2	1	1	0	1	1	1	1	0	0	3	0	0	4	1	1	1	2	1	0	1	1	5	8	2	8	13	2	0	0	6	28	27	24	10	0	7	0
chr16:4861170-4862249	9722340	9724498	0	1	0	0	0	0	0	0	0	0	1	0	0	0	1	0	0	0	0	0	0	0	0	0	4	1	1	2	1	0	0	0	2	2	5	6	0	0	0	0
chr16:66957418-66957822	133914836	133915644	0	0	0	0	0	0	0	0	0	0	0	0	0	0	0	0	0	0	0	0	1	0	0	0	11	9	3	9	16	0	0	0	7	11	10	36	13	0	0	0
chr16:68155889-68157024	136311778	136314048	5	5	7	4	2	5	2	2	2	1	2	3	0	3	6	2	3	4	1	1	9	7	4	3	9	6	3	2	16	5	3	6	11	18	16	11	5	0	0	9
chr16:68155889-68160513	68155889	68160513	10	8	10	14	9	4	5	5	6	2	7	10	5	5	7	5	1	4	6	8	10	4	7	10	17	10	7	13	18	12	1	11	7	12	35	30	4	4	0	11
chr16:68835572-68849662	68835572	68849662	0	0	0	0	0	0	0	0	0	0	0	0	0	1	1	1	1	1	0	0	0	1	2	1	2	1	3	2	0	2	0	0	5	5	4	8	0	4	7	7
chr16:69404385-69406258	69404385	69406258	2	4	5	4	0	2	2	1	3	2	2	1	0	7	2	4	7	3	2	0	2	1	5	1	5	8	1	4	6	3	0	0	7	6	6	23	0	0	6	6
chr16:69729038-69729282	69729038	69729282	1	0	0	0	0	0	0	2	0	1	0	0	1	0	0	0	3	0	2	0	4	2	2	2	2	5	2	9	11	8	0	12	0	17	6	23	0	0	13	0
chr16:70294946-70296427	140589892	140592854	2	0	0	0	0	0	1	0	1	0	0	0	1	0	2	0	1	0	3	2	3	2	0	2	10	4	2	3	6	8	5	0	15	4	8	20	2	7	0	0
chr16:70560489-70564820	70560489	70564820	0	1	0	0	0	0	0	0	0	0	0	0	0	0	0	0	0	0	0	0	1	0	1	0	0	3	0	2	9	0	0	0	17	30	9	14	8	0	1	0
chr16:71692135-71713438	71692135	71713438	0	0	0	0	1	0	0	0	0	1	0	0	1	0	0	0	0	0	0	3	3	2	1	1	0	2	0	0	2	12	0	0	3	7	8	3	6	0	5	0
chr16:71710349-71713438	71710349	71713438	0	0	0	0	0	0	0	1	1	0	0	0	1	1	0	0	1	0	0	0	0	0	1	2	3	3	0	0	2	0	0	0	7	14	9	8	2	0	5	0
chr16:85667519-85667738	171335038	171335476	11	12	10	19	8	11	7	2	13	3	6	13	10	20	13	15	16	15	18	26	37	23	18	27	30	34	11	48	48	2	0	0	22	43	37	136	12	15	30	10
chr16:89961445-89967202	89961445	89967202	0	0	1	1	1	1	1	0	2	0	0	0	0	0	1	0	0	2	0	0	1	1	1	1	12	1	3	5	10	0	0	0	2	9	10	3	6	6	14	0
chr16:8999043-9011013	8999043	9011013	0	0	0	0	0	0	0	0	0	0	0	0	0	0	0	0	0	0	0	0	0	1	0	1	7	3	0	3	1	0	0	7	14	16	23	5	4	17	1	0
chr16:9009110-9011013	18018220	18022026	0	1	1	0	0	0	1	1	2	0	0	0	0	1	2	3	1	1	2	0	1	3	5	4	5	7	0	2	8	10	9	1	19	21	16	14	12	0	2	2
chr16:9012887-9024254	18025774	18048508	0	0	0	0	0	0	0	0	0	0	0	0	0	0	0	0	0	0	0	0	0	0	0	0	1	3	0	1	2	0	0	8	2	11	17	13	1	0	7	0
chr17:17118298-17122523	17118298	17122523	0	0	1	0	1	0	0	0	0	0	0	0	0	0	0	0	0	0	0	0	2	0	0	0	1	9	1	6	2	1	0	4	2	19	19	14	3	11	0	0
chr17:19921299-20013875	39842598	40027750	2	1	1	0	0	1	0	1	0	4	1	0	2	1	2	2	2	1	3	2	5	4	6	6	2	2	0	3	3	0	0	0	0	0	4	4	0	0	0	0
chr17:20107645-20109225	40215290	40218450	11	12	9	22	10	9	8	8	18	6	12	13	22	9	21	17	45	27	29	23	79	49	62	57	101	58	52	66	97	116	138	63	97	119	148	85	103	47	57	15
chr17:27248705-27254081	27248705	27254081	0	0	0	0	1	0	0	1	0	0	0	0	0	0	0	0	0	0	0	0	1	0	0	0	0	5	0	2	1	2	0	0	8	2	10	2	0	0	0	0
chr17:29483000-29497015	29483000	29497015	0	0	1	1	0	0	0	0	0	1	0	0	2	0	2	1	0	0	2	0	1	0	2	1	0	0	0	1	4	4	0	0	4	14	5	3	5	4	11	7
chr17:30498061-30503232	30498061	30503232	1	0	0	0	0	0	0	0	1	0	2	2	0	1	0	1	1	0	0	0	0	0	1	0	0	0	1	0	5	0	1	0	4	2	4	3	0	0	0	0
chr17:30685521-30695033	30685521	30695033	0	0	0	0	0	0	0	0	0	0	0	0	0	0	0	0	0	0	0	0	0	0	0	0	0	0	0	1	5	5	0	6	5	24	10	3	8	1	0	0
chr17:30689932-30695033	30689932	30695033	0	0	0	0	0	0	1	0	0	0	0	2	0	0	0	0	2	1	2	0	2	0	2	0	1	4	3	6	22	16	0	3	23	67	54	38	27	0	19	0
chr17:30692348-30695033	30692348	30695033	0	0	0	0	0	0	0	0	0	0	0	0	0	0	0	0	0	0	0	0	0	1	1	1	1	6	1	0	3	1	4	0	2	17	4	8	6	0	0	0
chr17:34910660-34923615	34910660	34923615	1	0	1	0	0	0	0	0	0	0	0	0	0	0	0	0	0	0	0	0	0	0	0	0	0	0	2	1	2	6	1	0	15	8	10	9	0	0	6	0
chr17:35310185-35311207	35310185	35311207	1	0	0	0	0	0	0	1	0	0	1	2	1	2	0	0	1	1	0	1	1	2	0	0	3	2	1	0	4	1	8	0	6	2	2	9	0	0	1	0
chr17:36353600-36359042	36353600	36359042	0	0	0	0	0	0	0	0	0	0	0	0	0	0	0	0	0	1	0	0	0	0	1	0	0	0	0	0	1	1	2	0	2	4	3	6	0	0	4	10
chr17:36353600-36375177	36353600	36375177	0	0	0	0	0	0	0	0	0	0	0	0	0	0	0	0	0	0	0	0	0	0	0	0	0	0	1	0	4	6	0	0	11	5	7	3	16	0	1	0
chr17:40632684-40646491	40632684	40646491	0	0	0	0	0	1	0	0	0	0	0	0	0	0	0	0	0	0	0	0	0	1	0	0	0	1	0	0	0	0	0	0	5	6	6	2	0	0	0	0
chr17:40650941-40653322	40650941	40653322	0	0	0	1	0	0	1	0	1	1	0	0	1	0	1	0	0	2	1	0	1	1	2	1	0	6	0	1	1	1	0	2	10	3	23	16	32	0	11	0
chr17:40879652-40882936	40879652	40882936	0	0	0	0	0	0	2	0	0	0	1	0	0	1	1	1	0	2	0	1	2	1	0	1	0	2	0	3	0	0	0	0	12	5	2	3	3	0	0	0
chr17:4186092-4200109	4186092	4200109	0	1	0	0	2	1	0	0	0	1	0	1	0	0	0	0	1	0	0	0	0	1	1	0	2	2	0	0	4	0	0	8	3	18	6	8	1	0	0	0
chr17:4186092-4210418	4186092	4210418	0	1	1	1	0	0	0	1	1	0	0	0	0	0	1	2	0	0	0	0	0	1	0	1	0	1	0	0	0	6	16	0	15	14	12	3	7	0	0	8
chr17:42161922-42165064	84323844	84330128	0	0	0	0	0	0	0	0	0	0	0	0	0	1	0	0	0	0	0	0	0	0	0	1	9	3	5	1	4	0	0	0	5	11	6	11	0	0	1	0
chr17:43552465-43553092	87104930	87106184	3	2	3	4	1	0	0	1	2	4	0	0	8	3	1	5	3	7	3	4	9	4	3	7	6	7	2	7	20	1	0	0	3	16	17	18	15	0	14	0
chr17:45206758-45249430	45206758	45249430	0	0	1	0	0	0	0	1	0	0	0	0	0	0	0	0	0	2	0	0	0	0	1	2	1	3	0	0	0	0	0	0	7	5	5	2	0	0	0	0
chr17:48818462-48819092	48818462	48819092	0	0	0	0	0	0	0	0	1	0	0	0	0	0	0	0	0	0	0	0	2	0	1	0	8	1	2	0	5	4	0	0	7	11	8	7	0	0	0	0
chr17:49057106-49064598	49057106	49064598	0	0	0	0	0	0	0	0	0	0	0	0	0	0	0	0	0	1	0	0	1	0	1	1	1	0	1	1	4	5	0	0	12	11	10	7	3	0	0	0
chr17:49059884-49064598	49059884	49064598	0	0	0	0	0	1	0	0	0	0	0	0	1	0	0	0	0	0	0	0	0	0	0	1	8	3	0	1	0	2	0	0	3	18	8	5	4	0	0	0
chr17:49067810-49071296	49067810	49071296	0	0	0	0	0	0	0	0	0	1	0	0	0	0	0	0	0	0	2	0	2	0	1	0	2	5	0	0	5	0	0	0	8	14	7	7	15	0	5	0
chr17:49067810-49075978	49067810	49075978	0	1	0	0	1	0	0	0	0	0	0	0	0	0	1	0	0	0	1	0	0	0	1	0	0	2	0	2	2	0	0	0	5	18	10	3	0	0	9	0
chr17:49091592-49098726	49091592	49098726	0	0	0	0	0	0	0	0	0	0	0	0	0	0	0	1	0	0	0	0	0	0	0	1	0	1	0	1	2	0	0	0	9	3	2	6	9	0	0	0
chr17:49118861-49133843	49118861	49133843	0	0	0	0	1	0	0	0	0	0	1	0	0	0	1	0	0	1	0	0	0	2	0	1	3	3	2	2	20	11	0	0	13	25	8	12	0	10	0	9
chr17:49118861-49157065	49118861	49157065	0	0	0	0	0	0	0	0	0	0	0	0	0	0	0	1	0	0	0	0	0	0	0	1	1	0	0	0	4	12	0	0	10	7	4	4	0	0	0	3
chr17:5364258-5365866	10728516	10731732	0	2	1	1	2	1	1	0	0	0	1	0	1	1	0	1	0	1	2	0	0	0	0	0	0	2	0	0	2	0	1	0	2	2	4	2	6	0	0	0
chr17:56536128-56557628	56536128	56557628	0	0	1	0	0	0	0	0	1	0	0	0	0	0	0	0	0	0	0	0	1	0	1	0	3	0	0	4	2	0	0	0	3	2	7	10	0	0	0	0
chr17:58299769-58303592	58299769	58303592	0	0	0	0	0	0	0	0	0	0	0	0	0	0	0	0	0	0	0	0	1	0	0	0	0	1	0	0	1	0	0	0	4	4	3	2	0	0	9	0
chr17:58342772-58348842	58342772	58348842	0	0	0	0	0	2	0	0	0	0	0	1	1	0	0	1	2	1	1	1	0	0	0	2	0	0	0	2	1	4	0	0	14	3	6	8	8	0	0	0
chr17:58342772-58372162	58342772	58372162	0	1	0	0	0	0	0	0	0	0	0	0	0	0	4	0	3	0	1	0	0	0	1	0	0	2	0	1	1	1	0	11	11	10	21	4	0	0	8	0
chr17:58365883-58379065	58365883	58379065	0	0	1	0	0	0	0	0	0	1	0	0	0	0	0	1	0	0	0	0	0	0	0	0	0	4	0	1	2	0	0	6	9	25	8	3	0	0	0	6
chr17:58700881-58725443	58700881	58725443	1	0	0	0	0	0	0	0	0	0	0	0	0	0	0	0	0	0	0	0	0	0	0	0	3	0	0	1	6	0	0	0	2	12	8	12	4	0	0	0
chr17:58756813-58786686	58756813	58786686	0	0	0	0	0	0	0	0	0	0	0	0	0	0	0	1	0	1	1	0	1	1	0	2	1	9	1	8	5	0	0	1	4	12	10	15	0	3	0	11
chr17:58756813-58824640	58756813	58824640	0	0	0	0	0	0	0	0	0	0	1	0	0	0	0	0	0	0	0	0	0	0	0	1	0	0	0	2	2	1	0	0	3	5	13	12	4	0	0	0
chr17:59853761-59857762	59853761	59857762	2	0	1	3	1	2	2	1	1	2	0	2	0	1	1	0	0	2	2	0	0	0	0	1	2	2	1	1	4	7	11	7	5	37	18	10	3	0	0	0
chr17:60061531-60062451	120123062	120124902	0	0	0	0	0	0	0	1	0	0	1	0	0	1	1	0	3	0	3	1	2	2	2	1	4	1	2	4	8	10	0	5	15	23	45	16	30	0	23	20
chr17:60069900-60088594	60069900	60088594	0	0	0	0	0	0	0	0	1	1	0	0	0	0	1	0	0	0	0	0	1	0	0	0	0	1	0	0	1	5	0	0	3	2	6	3	0	8	0	0
chr17:60087910-60088594	60087910	60088594	0	0	0	0	0	0	0	0	0	0	0	0	0	0	0	0	1	0	0	2	0	0	0	0	4	4	0	0	7	5	6	9	5	19	5	5	14	0	2	0
chr17:60106901-60112969	60106901	60112969	0	0	1	0	0	0	0	0	0	1	0	0	0	0	0	0	0	0	1	0	0	0	0	1	0	0	0	0	2	4	0	4	7	5	9	2	2	0	2	0
chr17:62479035-62489138	62479035	62489138	1	0	0	0	0	0	0	0	0	0	0	0	0	0	0	0	0	0	0	0	0	0	0	0	0	2	3	2	0	1	0	0	11	7	4	6	1	0	0	0
chr17:65924470-65925603	65924470	65925603	1	0	0	0	0	0	0	0	0	0	0	0	0	0	0	0	1	0	0	0	0	0	0	0	1	1	0	0	2	0	0	0	2	3	10	2	4	0	11	16
chr17:65941524-65972074	65941524	65972074	0	2	1	0	1	1	1	3	1	4	2	3	2	4	1	6	2	4	3	5	6	0	10	4	13	6	4	6	9	11	8	0	5	11	9	5	2	4	7	0
chr17:7132287-7134116	7132287	7134116	0	0	0	0	0	0	0	0	0	0	0	0	0	0	0	0	0	0	0	0	0	0	0	0	3	0	0	0	1	0	0	0	6	3	4	3	1	0	0	0
chr17:73238416-73239651	73238416	73239651	0	0	1	0	0	0	0	0	0	0	0	0	0	0	1	1	0	0	1	1	0	0	0	0	0	0	0	0	2	0	0	0	4	3	8	4	1	0	0	0
chr17:7402357-7402810	14804714	14805620	0	1	2	0	1	2	3	0	1	3	0	0	0	2	1	2	0	2	1	0	3	1	3	0	37	34	20	38	107	23	7	5	99	114	103	201	62	19	19	13
chr17:8048068-8051577	8048068	8051577	0	0	0	0	0	0	0	0	0	0	0	0	0	0	0	0	0	0	0	0	0	0	0	0	4	2	3	2	4	0	0	0	0	3	9	4	3	0	0	0
chr18:12999419-13019205	25998838	26038410	1	1	6	10	4	4	4	7	7	1	7	3	7	4	7	7	3	3	4	3	2	2	9	10	2	3	1	0	4	9	2	10	12	5	22	2	0	0	2	1
chr18:12999419-13030607	12999419	13030607	7	6	1	2	3	6	5	10	1	3	2	4	8	2	7	8	3	4	4	5	2	1	2	1	6	4	1	3	1	1	0	10	0	8	14	11	0	0	0	0
chr18:19345732-19359646	19345732	19359646	3	5	2	4	1	3	2	0	3	1	1	1	3	2	1	3	4	3	4	1	0	2	3	2	4	4	1	3	2	0	0	2	6	11	10	9	6	0	0	0
chr18:21042927-21046240	42085854	42092480	0	0	0	0	0	0	0	0	0	0	0	0	0	0	0	0	0	0	0	0	2	2	2	2	3	0	1	9	5	0	0	5	26	19	22	20	4	5	40	14
chr18:21043930-21046240	21043930	21046240	0	0	0	0	0	0	0	0	0	0	0	0	0	0	0	0	0	0	0	0	1	0	0	0	0	3	0	3	0	0	0	0	3	11	24	9	20	0	0	0
chr18:21095819-21099138	42191638	42198276	0	0	0	0	0	0	0	0	0	1	0	1	0	0	0	0	0	0	0	0	0	0	0	3	8	3	4	6	16	6	1	2	15	17	25	34	13	7	7	10
chr18:2937689-2938035	2937689	2938035	0	0	0	0	0	0	0	0	0	0	0	0	0	0	0	0	0	0	0	0	0	0	1	0	2	3	1	2	8	4	0	0	9	9	15	10	0	0	0	0
chr18:29691716-29693823	29691716	29693823	11	4	5	2	1	1	0	0	0	0	0	0	0	1	2	1	1	0	2	0	0	0	0	0	0	1	0	0	0	0	0	0	0	0	0	2	0	0	0	0
chr18:55278868-55283207	55278868	55283207	0	0	0	0	0	0	0	0	0	1	0	0	0	0	0	0	2	1	0	0	0	1	0	0	0	0	2	5	0	5	13	3	8	22	23	21	18	0	4	0
chr18:55280833-55283207	55280833	55283207	0	0	0	0	1	0	0	0	0	0	0	0	0	0	0	0	0	0	0	0	0	1	0	1	0	0	2	0	4	4	0	0	2	9	12	5	3	0	0	0
chr18:60206913-60217693	120413826	120435386	0	0	1	0	1	2	1	1	0	0	3	0	4	2	2	1	3	0	2	3	3	1	8	6	9	24	4	14	15	24	0	15	34	58	28	72	33	9	15	8
chr18:60206913-60243885	120413826	120487770	0	0	0	0	0	0	0	0	0	0	0	0	0	0	0	0	1	2	1	0	3	3	4	0	8	10	4	7	3	2	0	9	1	8	2	5	2	4	0	0
chr18:74561481-74563895	74561481	74563895	1	2	1	4	1	0	2	0	0	0	0	1	1	0	0	4	1	2	2	1	2	2	2	3	0	1	1	3	2	0	15	0	7	14	10	9	5	9	0	0
chr18:9182379-9221997	18364758	18443994	1	4	6	3	5	0	1	2	3	6	2	1	2	6	5	6	5	4	5	0	3	12	11	10	5	17	7	9	14	49	33	54	30	111	67	52	23	5	30	20
chr18:9195548-9221997	9195548	9221997	0	1	0	0	2	0	0	0	0	0	1	0	2	1	0	0	0	0	0	1	1	1	2	1	2	1	1	1	6	0	0	12	16	31	17	6	7	0	7	4
chr18:9931806-9937063	9931806	9937063	3	3	6	1	2	1	0	2	1	3	0	0	0	2	2	0	0	2	2	1	1	0	2	1	8	7	1	2	2	9	0	10	5	7	6	7	12	6	1	0
chr18:9931806-9950565	9931806	9950565	3	0	1	1	1	0	0	2	1	0	0	0	0	0	0	0	1	0	1	0	0	0	2	1	3	1	0	1	8	13	10	0	7	7	16	4	0	0	9	0
chr19:11230767-11231198	11230767	11231198	10	6	3	2	1	2	3	1	2	1	1	0	4	2	1	1	3	1	5	3	1	3	0	2	1	1	3	2	6	0	0	0	0	7	0	9	0	0	2	0
chr19:12989195-12989648	12989195	12989648	0	0	0	0	0	0	0	0	0	0	0	0	0	0	0	0	0	0	0	1	0	0	0	0	5	4	3	3	7	0	0	1	0	10	3	16	0	0	4	0
chr19:18648410-18649246	18648410	18649246	2	1	1	2	1	0	1	0	1	1	2	2	0	1	0	1	3	1	1	0	6	3	3	3	14	4	0	3	12	0	0	0	2	4	9	12	0	2	0	0
chr19:18650180-18650530	37300360	37301060	2	0	0	3	1	0	2	0	2	3	3	5	0	3	1	1	0	3	1	0	4	2	0	1	4	2	1	5	8	0	0	0	4	5	0	14	9	0	0	5
chr19:19603114-19603521	19603114	19603521	0	0	1	1	0	0	0	0	0	0	0	0	0	0	2	0	0	0	0	0	0	0	0	0	1	2	0	2	9	8	0	3	22	28	3	16	5	1	7	0
chr19:2213537-2214595	4427074	4429190	0	0	1	0	1	0	0	0	0	0	0	0	0	0	0	0	0	0	0	0	0	0	0	0	4	2	0	2	9	0	0	4	11	19	7	11	0	0	5	0
chr19:4053968-4055245	4053968	4055245	0	0	0	0	0	1	0	0	0	0	1	0	0	0	0	0	0	0	0	0	0	0	0	0	3	1	1	3	7	0	0	0	6	3	7	9	8	0	0	0
chr19:47767859-47768203	95535718	95536406	1	0	2	1	1	1	1	1	1	1	0	0	0	0	2	4	2	1	8	0	5	5	2	2	10	5	5	9	19	0	0	2	10	0	18	9	11	0	0	0
chr19:55756487-55757046	111512974	111514092	1	1	0	0	0	0	0	0	0	0	0	0	0	0	0	0	1	1	0	0	0	0	0	0	2	3	1	2	4	4	0	0	17	8	6	13	0	0	4	0
chr19:5604593-5604947	11209186	11209894	5	3	3	0	1	1	2	0	2	3	4	1	0	1	1	1	3	2	3	3	2	1	2	1	0	3	3	6	6	13	13	3	4	18	7	15	2	0	5	0
chr19:5650988-5654467	5650988	5654467	0	0	0	0	0	0	0	0	1	0	1	0	0	0	0	0	0	0	1	0	0	0	0	1	4	0	1	1	0	0	17	0	3	2	7	3	0	7	0	0
chr19:5653125-5654467	11306250	11308934	2	0	0	0	0	0	1	0	0	0	0	0	0	0	0	0	0	1	0	0	3	0	2	2	7	7	2	4	9	8	0	4	10	9	17	27	7	4	0	5
chr19:8520288-8528570	17040576	17057140	1	2	1	3	0	0	1	0	0	2	1	0	2	5	5	1	4	6	6	3	9	8	10	6	8	15	8	23	29	16	15	21	33	46	64	101	50	2	13	4
chr19:8520288-8530399	8520288	8530399	0	0	0	0	0	0	0	0	0	0	0	0	0	0	0	0	0	0	1	0	0	0	0	0	0	2	1	1	0	0	0	0	4	9	5	4	0	0	0	1
chr19:8530207-8539128	8530207	8539128	0	1	0	0	0	0	0	0	0	0	0	0	0	0	0	0	0	0	0	0	3	0	0	1	0	7	1	0	1	0	0	0	12	4	4	2	0	0	0	0
chr1:111690263-111703918	111690263	111703918	1	2	1	1	1	0	0	2	0	0	0	0	0	1	0	0	1	0	0	1	1	1	0	4	0	2	1	1	0	1	11	4	2	5	13	3	3	0	0	0
chr1:113196219-113202401	113196219	113202401	2	1	0	0	2	0	0	1	2	2	0	1	0	1	1	3	0	1	2	0	1	0	0	0	0	5	0	1	6	6	0	5	6	5	24	16	10	0	11	0
chr1:1158623-1159348	2317246	2318696	4	4	4	0	1	2	2	5	1	1	4	1	0	3	8	0	3	5	4	2	5	1	3	5	3	1	2	4	9	16	0	5	14	9	3	17	1	0	8	7
chr1:117944807-117948267	235889614	235896534	1	1	1	3	1	0	1	1	0	1	0	1	1	0	1	1	3	3	1	2	2	2	3	4	7	2	4	7	3	8	0	0	16	24	10	22	3	0	1	1
chr1:117944807-117957453	235889614	235914906	4	7	5	5	2	1	1	1	3	2	2	3	3	4	2	3	6	12	2	4	5	3	4	7	9	14	1	11	11	38	21	30	76	73	51	47	33	16	31	0
chr1:117944807-117963271	235889614	235926542	14	7	9	11	8	14	7	8	7	13	2	6	7	11	13	12	11	22	15	12	12	16	13	14	25	34	14	25	54	70	56	46	76	147	188	133	53	51	90	46
chr1:117944807-117984947	235889614	235969894	5	3	1	3	4	3	5	3	3	2	1	2	3	4	6	6	10	11	1	3	5	5	6	9	3	13	0	8	13	8	4	19	18	63	65	52	53	3	22	4
chr1:145897084-145900490	145897084	145900490	1	0	3	1	1	0	2	0	0	1	0	1	2	1	0	2	1	0	1	1	1	1	1	2	0	0	0	2	0	2	0	0	8	10	3	4	3	0	0	0
chr1:150198939-150201570	300397878	300403140	0	0	0	0	0	0	0	0	0	0	0	0	0	0	0	0	2	0	5	1	0	1	2	1	0	2	0	3	5	9	6	6	8	16	19	7	1	15	6	0
chr1:153784206-153785928	153784206	153785928	0	0	0	0	0	0	0	0	0	0	0	0	0	0	0	0	0	0	0	0	3	1	0	0	2	0	0	0	1	0	0	0	4	10	12	2	2	0	0	0
chr1:154223516-154224129	154223516	154224129	0	0	0	0	0	0	1	0	0	1	0	0	0	0	0	0	0	0	0	0	2	1	3	0	1	0	0	1	2	0	0	0	3	6	10	3	0	4	8	0
chr1:155408117-155408859	155408117	155408859	0	0	0	1	1	0	1	0	0	0	3	1	1	0	0	0	1	1	1	0	3	0	0	4	5	2	2	1	3	3	0	10	18	12	2	5	15	0	0	0
chr1:155408117-155429689	310816234	310859378	3	2	3	1	4	1	1	3	1	3	2	3	1	5	2	3	0	2	5	1	8	6	4	4	7	5	4	5	2	12	0	1	19	24	43	14	25	1	36	0
chr1:155490890-155491409	155490890	155491409	0	0	0	0	0	0	0	1	0	0	0	1	0	0	0	1	0	1	0	0	0	0	1	1	4	6	0	1	1	1	0	11	4	11	5	3	15	0	0	0
chr1:155823066-155823597	155823066	155823597	4	2	9	0	2	1	2	2	2	2	0	0	1	6	1	1	2	0	2	1	3	1	0	0	2	2	0	1	0	3	0	4	5	17	4	3	1	0	0	0
chr1:155896466-155896947	155896466	155896947	2	1	0	2	0	1	1	0	0	0	0	2	0	1	0	1	0	1	1	1	2	0	0	1	4	1	0	3	0	3	0	0	5	11	4	2	2	0	1	0
chr1:15964801-15970145	31929602	31940290	0	2	0	0	0	0	0	0	1	2	0	0	3	0	1	4	2	4	4	1	1	3	0	3	2	2	1	2	7	0	1	1	11	13	17	32	1	0	0	3
chr1:16199310-16203173	16199310	16203173	0	0	0	1	1	0	0	0	0	0	0	0	0	0	0	0	0	0	0	0	0	0	0	0	4	1	0	0	1	0	0	0	4	7	3	3	0	0	12	0
chr1:171492359-171556890	171492359	171556890	0	0	0	0	0	0	0	0	0	0	0	0	0	0	0	1	1	0	0	0	2	1	0	0	10	3	3	0	7	0	0	0	3	3	15	15	4	5	6	0
chr1:172520651-172526934	172520651	172526934	2	4	1	0	1	2	0	0	1	2	4	2	3	6	4	5	5	3	5	6	3	8	6	7	14	18	2	3	14	30	17	2	34	71	79	17	56	2	24	6
chr1:172520651-172548407	172520651	172548407	1	1	0	0	0	0	0	1	0	0	1	0	0	1	2	0	3	3	0	2	0	5	2	3	7	3	3	0	3	4	8	9	19	11	13	3	4	0	0	0
chr1:172525008-172526934	345050016	345053868	3	0	0	2	0	1	0	1	0	1	1	1	0	0	1	2	2	0	0	1	0	0	2	2	2	0	2	1	1	3	2	10	27	39	23	14	17	4	5	0
chr1:172525008-172539870	172525008	172539870	1	0	1	3	0	1	1	0	2	0	1	0	4	0	0	2	1	2	2	1	1	2	2	4	3	3	0	4	9	7	12	5	28	36	48	11	14	0	8	0
chr1:174241551-174274265	174241551	174274265	1	0	2	1	1	0	1	4	1	0	0	0	0	0	1	0	0	0	0	1	0	0	0	1	0	1	1	4	2	3	0	6	2	4	6	3	0	0	0	0
chr1:1747194-1770677	1747194	1770677	0	0	0	1	0	0	0	0	1	0	0	0	0	0	2	0	0	0	0	0	3	0	2	0	1	0	1	0	2	2	0	0	3	2	2	5	0	0	3	4
chr1:174973749-174977842	174973749	174977842	1	0	0	0	1	0	0	0	0	0	0	0	0	0	2	0	1	0	0	1	1	2	0	0	0	1	0	1	5	8	5	3	10	4	3	6	0	0	0	0
chr1:179834570-179834989	179834570	179834989	0	0	0	0	0	0	0	1	0	0	0	0	0	0	1	0	0	0	0	0	0	0	1	1	4	4	1	2	2	0	0	2	3	8	30	14	8	0	3	0
chr1:185183638-185200840	185183638	185200840	0	0	0	1	0	0	1	0	0	0	0	0	0	0	0	0	0	0	1	0	1	2	2	1	1	0	0	0	1	11	0	1	2	31	15	4	2	0	0	0
chr1:202724398-202729701	202724398	202729701	0	1	0	0	0	0	0	0	0	0	0	0	0	0	0	0	0	0	0	0	0	0	0	0	0	0	1	0	1	0	0	0	5	10	10	7	8	0	0	0
chr1:202742245-202746222	202742245	202746222	0	0	0	0	0	0	0	0	0	0	0	0	0	0	0	0	0	0	1	0	0	0	0	0	4	5	0	1	3	0	0	2	2	4	6	8	3	4	2	11
chr1:203786053-203787817	203786053	203787817	2	0	0	0	0	0	0	1	0	0	0	0	0	0	0	0	0	1	0	0	0	1	1	0	0	1	0	1	4	6	0	0	10	6	7	5	3	0	0	0
chr1:205238077-205239012	410476154	410478024	0	0	1	0	0	0	0	0	0	0	1	0	0	0	1	0	0	0	3	3	20	7	3	5	9	18	13	20	27	0	0	0	5	23	23	14	3	0	0	0
chr1:205585605-205593019	205585605	205593019	5	6	8	8	4	2	5	5	0	3	5	2	4	3	4	7	2	3	5	3	4	6	2	6	10	8	2	4	7	9	0	13	5	19	6	17	3	0	10	6
chr1:21071236-21100103	21071236	21100103	0	1	0	0	0	0	0	0	0	0	0	0	0	0	0	0	0	0	0	0	1	0	1	1	0	3	0	1	0	0	0	0	4	2	14	4	0	4	0	0
chr1:21076215-21100103	42152430	42200206	0	1	0	3	2	1	1	1	0	2	0	1	0	0	0	1	1	1	1	1	2	0	7	1	10	9	7	3	3	4	0	9	11	5	14	19	13	5	13	0
chr1:21083658-21100103	42167316	42200206	2	1	1	1	4	4	1	1	1	2	2	2	1	9	2	8	4	1	2	5	7	4	1	3	7	10	8	12	6	14	7	13	31	31	44	56	18	14	41	9
chr1:21091869-21100103	21091869	21100103	0	0	0	0	0	0	1	0	0	1	0	0	0	1	0	1	1	0	0	1	0	0	0	1	0	2	1	2	5	1	2	15	9	8	5	6	5	0	0	0
chr1:21097422-21100103	21097422	21100103	1	1	2	0	0	1	1	0	0	0	3	1	2	2	1	0	0	3	0	1	1	0	3	4	1	2	2	6	3	20	6	6	6	19	9	10	0	0	5	0
chr1:220178589-220180680	220178589	220180680	0	0	0	0	0	0	0	0	0	0	0	0	1	0	0	0	0	0	0	0	0	0	0	1	0	1	1	0	0	0	3	0	4	11	2	4	0	1	0	0
chr1:22041881-22050588	22041881	22050588	0	0	0	0	1	0	0	0	0	0	0	0	0	0	0	1	0	1	1	1	0	1	0	0	0	0	0	2	4	5	0	3	4	13	9	8	0	6	0	0
chr1:222897433-222903519	222897433	222903519	0	0	0	0	0	0	0	1	0	0	0	0	0	0	0	0	1	0	0	0	0	1	0	0	0	0	0	0	0	3	1	0	4	7	5	4	3	0	1	0
chr1:226175596-226176089	226175596	226176089	0	0	0	0	1	0	0	0	0	0	0	0	0	0	0	0	0	0	0	0	0	2	0	0	0	3	0	1	3	1	3	10	2	14	5	12	1	0	0	0
chr1:23356961-23377013	23356961	23377013	2	2	1	0	1	0	1	3	1	0	1	3	1	1	1	2	1	3	1	1	1	1	0	0	0	2	3	3	2	1	0	2	2	3	2	11	5	0	4	0
chr1:235311718-235324772	235311718	235324772	0	0	0	0	0	0	0	0	0	0	0	0	0	0	0	0	0	0	0	0	0	0	0	0	1	4	1	1	0	7	0	8	10	12	5	3	4	0	0	0
chr1:235357327-235377341	235357327	235377341	0	0	0	0	0	0	0	0	0	0	0	0	0	0	0	0	0	0	0	0	0	0	0	0	0	1	0	0	0	0	9	4	4	4	5	3	1	0	4	0
chr1:24112164-24112913	24112164	24112913	0	0	0	0	0	0	0	0	0	0	0	0	0	0	0	0	0	0	0	0	0	0	0	0	0	0	0	0	2	0	0	0	8	3	7	8	1	0	0	0
chr1:245020899-245021576	245020899	245021576	0	0	0	0	0	0	0	0	0	0	0	0	0	0	0	0	0	0	0	0	0	0	0	0	0	0	0	0	6	3	0	1	5	7	8	5	4	7	1	0
chr1:25551492-25555614	25551492	25555614	0	0	0	0	0	0	0	0	0	0	0	0	0	0	0	0	0	0	0	0	0	0	0	0	0	0	0	0	0	0	0	4	3	5	2	3	1	0	0	0
chr1:25666964-25678184	25666964	25678184	1	0	0	0	0	0	0	0	0	0	0	0	0	0	0	0	2	0	2	0	0	0	0	0	0	1	0	1	1	2	0	3	4	19	13	13	1	0	0	0
chr1:25773252-25780873	25773252	25780873	0	0	0	0	0	0	0	0	0	0	0	0	0	0	0	0	0	0	0	1	0	0	0	0	0	0	0	1	1	0	0	0	6	7	12	2	0	1	0	0
chr1:25775298-25783322	51550596	51566644	0	0	0	0	1	0	0	0	0	0	0	0	0	0	0	0	1	0	0	0	1	0	0	0	2	0	0	2	2	3	0	0	6	30	21	19	5	6	3	0
chr1:25784881-25785383	51569762	51570766	0	0	0	0	0	0	0	0	0	0	0	0	0	0	0	0	0	0	0	0	0	2	0	0	3	2	1	2	3	1	0	4	2	31	13	8	0	0	2	13
chr1:26584087-26586293	26584087	26586293	1	2	0	1	3	1	0	0	1	0	2	1	1	0	1	1	1	0	1	0	0	0	0	1	0	1	0	0	1	0	0	0	3	3	16	9	1	0	8	0
chr1:27056141-27059283	27056141	27059283	3	5	3	2	3	2	5	2	1	1	2	1	1	1	3	1	8	6	2	8	6	2	2	4	15	4	15	4	8	6	0	0	0	14	23	8	1	0	0	0
chr1:28800065-28802803	57600130	57605606	0	0	0	0	0	0	0	0	0	1	0	0	0	0	0	0	0	0	0	0	2	0	0	0	0	0	0	0	1	0	7	1	2	4	4	3	0	0	2	0
chr1:29068914-29070498	29068914	29070498	2	1	5	0	0	2	0	2	0	2	1	1	0	0	1	1	0	0	1	0	0	2	2	0	1	3	0	0	10	2	0	0	5	6	13	2	5	0	0	0
chr1:29313942-29314417	58627884	58628834	0	0	0	0	0	0	0	0	0	0	0	0	0	0	0	0	0	0	1	0	4	2	6	1	12	16	5	7	23	40	43	21	69	96	70	76	32	26	21	15
chr1:29313942-29320054	29313942	29320054	0	0	0	0	0	0	0	0	0	0	0	0	2	0	0	0	1	1	0	0	1	1	1	1	0	5	1	3	12	21	33	2	22	37	30	19	4	0	4	0
chr1:29313942-29323831	58627884	58647662	0	2	0	1	1	0	0	0	0	0	0	0	2	0	1	0	0	1	1	2	5	3	6	5	6	7	0	10	11	13	10	35	38	67	52	50	39	1	19	7
chr1:29313942-29338419	58627884	58676838	0	0	0	0	0	0	0	0	0	0	0	0	0	0	0	0	0	0	0	0	0	0	2	0	1	6	1	0	1	10	0	3	3	3	8	12	4	0	0	0
chr1:29313942-29342279	29313942	29342279	0	0	0	0	0	0	0	0	0	0	0	0	0	0	0	0	0	0	0	0	0	0	1	0	4	3	1	2	4	4	2	4	5	7	16	9	5	0	3	6
chr1:29313942-29344954	29313942	29344954	0	0	0	0	0	0	0	0	0	0	0	0	0	0	0	0	0	0	1	0	1	1	0	0	0	6	0	3	3	5	0	4	23	19	9	8	7	0	8	1
chr1:29313942-29365938	29313942	29365938	0	0	0	0	0	0	0	0	0	0	0	0	0	0	0	0	0	0	0	0	1	0	1	0	4	4	0	2	5	0	2	0	10	6	4	12	0	0	2	1
chr1:29313942-29379824	58627884	58759648	0	0	0	0	0	0	0	0	0	0	0	0	0	0	0	0	0	0	0	0	0	1	0	0	7	2	2	2	10	9	0	1	7	24	11	16	11	5	1	11
chr1:29313942-29391670	58627884	58783340	0	0	0	0	0	0	0	0	0	0	0	0	1	0	0	0	0	1	0	0	4	0	3	2	12	12	6	14	18	18	20	16	17	33	42	36	14	9	7	4
chr1:29319841-29323831	29319841	29323831	0	0	0	0	0	0	0	0	0	1	0	1	0	0	0	0	0	0	0	0	1	2	0	1	0	4	0	0	4	12	0	0	11	7	8	9	3	0	0	0
chr1:29319841-29344954	29319841	29344954	0	0	2	0	0	0	0	0	0	0	0	0	1	1	0	0	0	0	0	1	1	0	0	0	2	0	1	1	3	4	0	0	10	7	11	2	5	0	1	0
chr1:29362337-29365938	29362337	29365938	0	0	0	0	0	0	0	0	0	1	0	1	1	0	0	1	0	0	2	1	2	0	0	1	4	1	0	2	1	2	0	1	2	2	4	17	0	0	9	5
chr1:29362337-29379824	29362337	29379824	0	0	0	0	0	0	1	0	0	0	1	0	0	0	0	1	1	0	1	0	6	0	1	5	5	1	1	7	12	8	0	0	5	25	26	9	6	0	2	5
chr1:29362337-29391670	58724674	58783340	0	0	0	0	0	0	0	0	0	0	0	0	0	0	2	0	1	0	3	2	5	4	2	7	15	6	7	15	12	17	11	13	27	27	66	50	19	11	36	0
chr1:29379615-29391670	58759230	58783340	0	0	0	0	0	0	0	0	0	0	0	0	0	0	0	0	0	0	0	0	0	0	0	0	17	5	2	1	8	0	1	0	2	23	27	25	4	7	6	9
chr1:29386933-29424447	29386933	29424447	0	0	0	0	0	0	0	1	0	0	0	0	0	1	0	0	1	2	1	0	1	1	1	1	0	6	1	3	6	5	14	0	15	4	13	8	0	0	8	0
chr1:32381495-32385259	64762990	64770518	2	2	4	3	1	5	1	2	2	2	3	6	2	1	1	0	2	4	0	0	0	3	0	0	2	4	0	3	6	1	0	6	3	13	24	2	0	0	0	0
chr1:35643589-35653691	71287178	71307382	1	0	0	0	0	0	0	0	0	0	1	0	0	0	0	0	0	0	0	0	1	1	1	0	6	4	2	12	11	37	9	23	19	14	16	21	17	0	0	8
chr1:35824525-35827390	71649050	71654780	1	0	2	1	0	2	1	2	1	0	0	0	0	1	1	0	1	2	1	2	0	1	0	1	0	4	0	1	2	10	0	0	3	7	2	9	0	4	0	0
chr1:40654726-40668286	40654726	40668286	0	0	0	0	1	0	1	0	1	0	0	0	1	1	0	0	0	0	0	2	0	0	0	0	0	2	0	2	2	3	2	7	16	24	15	2	2	0	0	0
chr1:41536266-41541123	41536266	41541123	5	3	0	1	1	1	2	0	2	1	0	1	0	1	0	0	2	2	6	2	3	3	0	2	2	5	3	5	6	4	0	0	3	4	0	12	11	5	14	0
chr1:46105881-46108171	46105881	46108171	0	2	0	2	0	1	0	0	1	0	1	2	0	1	0	0	1	0	1	2	3	1	0	1	5	2	2	10	2	2	0	5	0	3	6	11	0	9	3	0
chr1:47745912-47748131	95491824	95496262	0	1	1	1	2	1	1	0	1	2	1	0	4	2	3	1	23	9	11	5	8	12	5	17	29	16	2	12	17	29	11	25	80	103	75	57	73	10	43	18
chr1:47834140-47840965	95668280	95681930	0	0	0	0	0	0	0	0	0	0	0	0	1	0	0	0	0	0	0	1	2	0	0	1	0	0	0	0	1	0	6	0	5	11	14	5	8	0	0	0
chr1:51868106-51874004	51868106	51874004	2	3	0	4	0	2	0	1	3	3	2	0	4	2	1	5	4	4	2	4	1	2	4	3	8	4	0	0	2	6	0	3	2	19	19	7	6	0	0	7
chr1:52981562-52992045	52981562	52992045	0	0	0	0	0	0	1	0	0	1	0	0	1	0	0	0	0	0	1	0	0	1	0	0	0	0	0	1	0	5	0	0	5	4	4	2	1	0	0	0
chr1:54506428-54513045	54506428	54513045	0	0	0	0	0	0	0	0	0	0	0	0	0	0	0	0	0	0	0	1	1	2	0	1	0	0	0	2	0	0	0	0	5	3	11	4	0	0	0	0
chr1:62910408-62913182	62910408	62913182	0	0	0	0	0	0	0	0	0	0	0	0	1	0	1	2	0	1	2	0	1	0	2	1	0	1	0	1	1	0	0	0	12	4	2	7	9	0	0	0
chr1:65830317-65831879	65830317	65831879	1	4	0	3	0	1	0	4	2	2	3	0	1	3	2	2	2	3	1	6	6	1	3	6	12	7	2	10	14	6	0	0	29	26	51	47	25	14	40	15
chr1:67423741-67428843	67423741	67428843	1	0	0	1	1	1	1	1	0	1	3	1	3	3	1	0	1	2	1	1	2	2	3	2	2	1	0	1	1	1	0	2	8	15	19	10	4	17	1	0
chr1:70758070-70781249	70758070	70781249	0	1	0	1	0	2	1	1	0	0	0	1	1	1	2	0	6	2	1	2	1	1	4	1	1	3	2	1	3	8	1	5	22	21	29	7	3	0	5	0
chr1:78177431-78181553	156354862	156363106	0	1	0	0	0	0	1	1	0	0	0	0	3	1	1	0	0	1	0	0	0	1	1	1	0	1	0	0	1	10	0	6	12	27	12	11	5	0	0	0
chr1:85121514-85136991	85121514	85136991	1	0	0	1	1	1	0	0	0	0	1	1	0	0	0	1	0	0	0	0	0	0	0	0	1	0	0	0	0	3	10	0	5	3	9	4	0	0	8	0
chr1:8716031-8716500	8716031	8716500	1	0	0	0	0	0	0	0	1	0	0	0	0	0	0	1	0	2	0	1	5	2	1	2	2	3	0	5	1	4	10	5	4	11	3	8	9	1	0	1
chr1:89206670-89251896	89206670	89251896	1	1	0	0	1	1	0	0	0	0	1	0	0	0	0	1	3	0	0	1	1	2	0	1	1	4	0	1	2	0	0	0	5	8	24	8	4	10	17	0
chr1:94341823-94343418	188683646	188686836	0	0	1	2	1	0	0	0	0	1	0	0	3	1	2	1	0	4	0	2	0	0	2	1	3	9	0	1	8	4	1	8	11	10	19	16	4	4	0	0
chr1:94360169-94363454	94360169	94363454	0	0	1	1	1	0	0	0	0	0	0	0	1	0	1	1	1	0	0	1	0	0	1	0	0	0	0	0	0	0	0	0	8	5	2	8	0	0	3	0
chr1:95609446-95616975	191218892	191233950	1	1	0	2	1	1	3	0	3	3	4	3	3	0	5	2	3	6	7	2	1	5	3	9	1	11	4	3	2	17	0	20	33	46	82	32	30	0	7	3
chr1:95609446-95639445	95609446	95639445	1	1	2	1	2	0	3	2	2	2	2	3	1	5	8	3	2	3	6	3	0	3	3	7	3	4	0	4	1	8	15	2	8	15	41	7	12	0	3	29
chr20:17928129-17937681	17928129	17937681	0	1	0	0	0	0	1	0	2	1	0	0	0	1	0	0	0	0	0	0	1	2	0	2	2	2	0	0	0	1	0	3	5	2	4	5	0	1	0	0
chr20:2928627-2945848	2928627	2945848	0	2	0	0	0	0	0	0	0	1	0	0	0	1	1	0	0	0	0	0	0	2	1	1	0	1	2	1	0	0	0	0	7	4	2	3	3	2	0	0
chr20:2944917-2945848	2944917	2945848	4	1	2	0	0	0	0	0	0	2	0	0	0	0	0	0	0	2	1	1	0	5	0	1	1	0	0	2	6	5	0	0	5	17	13	21	12	4	14	0
chr20:30954186-30956926	61908372	61913852	9	0	3	3	5	4	0	2	3	2	2	4	0	2	1	6	3	2	5	4	7	3	5	4	6	6	3	11	15	4	0	5	10	15	7	29	7	0	0	0
chr20:34300940-34313077	34300940	34313077	1	0	0	2	0	0	0	0	0	0	0	0	0	0	0	1	1	0	0	0	0	0	2	2	0	2	1	1	1	0	0	3	4	7	9	5	0	0	0	0
chr20:34302106-34313077	34302106	34313077	0	3	7	1	1	3	2	1	1	1	1	1	5	2	1	1	0	4	1	1	3	1	4	2	6	5	2	6	5	6	6	11	23	33	26	31	21	0	12	0
chr20:34312491-34313077	34312491	34313077	0	0	0	0	0	0	0	0	0	0	0	0	0	0	1	0	0	0	0	0	0	0	0	0	0	0	0	1	0	0	0	0	4	6	7	6	1	0	0	0
chr20:34317233-34320057	68634466	68640114	2	0	0	0	0	0	0	0	1	0	0	0	0	0	0	1	0	0	1	0	4	1	1	1	4	11	2	4	4	5	8	0	24	37	21	15	14	5	6	26
chr20:35695126-35696589	35695126	35696589	0	0	0	0	0	0	0	0	0	0	0	0	0	0	1	1	0	0	0	0	0	2	2	1	0	1	0	1	3	2	1	0	5	8	2	4	4	0	0	0
chr20:36685933-36694658	36685933	36694658	0	4	1	2	4	1	0	2	1	1	1	1	1	1	2	1	1	2	0	1	0	2	2	0	1	0	2	2	1	0	0	0	7	11	2	5	3	0	6	0
chr20:3925823-3955047	3925823	3955047	2	1	0	0	0	0	0	0	1	0	0	0	0	0	0	0	0	1	0	0	2	1	0	0	0	0	0	0	0	2	1	3	2	17	2	7	4	0	7	0
chr20:39704810-39709880	79409620	79419760	0	0	0	0	0	0	0	0	0	0	0	0	0	0	0	0	0	0	0	0	0	0	1	0	0	0	0	0	0	3	0	8	4	12	9	2	0	0	0	0
chr20:39704810-39713208	79409620	79426416	0	0	0	0	0	0	0	0	0	0	0	0	0	0	0	0	0	0	0	0	0	0	1	0	0	1	0	3	2	5	16	10	15	1	5	2	0	0	0	0
chr20:39704810-39721227	39704810	39721227	0	0	0	0	0	0	0	0	0	0	0	0	0	0	0	0	0	0	0	0	0	0	0	0	0	0	0	0	2	2	13	11	0	7	0	0	0	0	5	0
chr20:39721111-39729993	79442222	79459986	1	0	0	3	0	0	0	0	2	0	1	2	2	0	2	1	3	0	6	3	3	7	5	6	33	37	9	33	56	41	7	29	41	147	222	126	96	17	108	11
chr20:42331129-42333998	84662258	84667996	2	1	4	2	1	1	0	2	1	2	0	1	5	1	0	2	5	6	6	5	3	0	2	2	4	9	1	7	7	0	0	0	1	3	5	11	0	7	8	0
chr20:43607083-43653771	43607083	43653771	0	0	0	0	0	0	0	0	0	0	0	0	0	0	0	0	0	1	0	0	0	0	0	0	0	1	0	0	0	0	0	0	6	4	6	2	0	0	0	0
chr20:45905057-45916028	45905057	45916028	1	4	1	1	1	1	0	2	0	2	0	1	0	0	1	1	0	1	3	1	2	1	1	0	4	4	3	0	3	4	0	0	5	18	16	5	0	6	5	7
chr20:47707278-47711500	47707278	47711500	0	0	0	0	0	0	0	0	0	0	0	0	0	0	0	0	0	0	0	0	1	0	0	0	1	2	0	0	0	0	0	0	4	3	3	6	2	0	0	0
chr20:47886478-47888287	47886478	47888287	0	0	0	0	0	0	0	0	0	0	0	0	1	0	0	0	0	0	1	1	3	3	2	3	1	1	4	1	2	0	0	4	3	5	1	3	9	1	0	13
chr20:54956488-54959380	54956488	54959380	1	4	2	0	1	1	0	0	1	1	0	1	0	0	0	1	0	3	4	1	0	0	0	2	2	4	0	3	3	21	0	4	17	12	26	10	2	0	9	0
chr20:57014000-57016139	57014000	57016139	0	2	1	1	3	2	4	2	1	1	1	1	0	2	0	2	5	1	5	1	5	6	0	2	1	2	1	3	2	5	0	7	9	6	12	19	3	4	16	1
chr20:60714130-60716000	60714130	60716000	0	0	1	0	0	0	0	0	2	2	0	0	0	0	2	0	3	0	0	0	0	3	1	1	3	3	0	5	7	3	0	0	8	4	7	24	5	0	0	0
chr20:62559687-62562375	62559687	62562375	1	0	0	0	0	1	0	2	0	2	1	0	1	1	1	1	0	0	2	0	0	0	1	2	1	3	1	0	0	0	0	0	6	2	5	8	0	0	0	0
chr21:17135209-17138460	17135209	17138460	1	3	1	2	0	3	1	5	0	2	3	0	5	3	4	1	1	0	2	6	2	2	2	3	3	1	6	6	2	11	0	1	10	12	15	8	3	10	12	19
chr21:17205666-17214859	17205666	17214859	1	0	0	1	1	0	3	0	2	0	1	0	0	2	1	0	0	2	1	0	0	1	1	0	0	1	3	0	0	0	6	5	14	10	4	5	0	0	0	0
chr21:30693541-30702014	30693541	30702014	3	2	2	4	3	4	3	3	4	4	3	1	2	2	2	2	4	1	0	3	2	3	8	1	7	11	7	10	10	24	55	14	20	25	77	20	19	7	3	0
chr21:30698379-30702014	30698379	30702014	1	1	0	1	0	1	1	0	4	1	1	2	1	0	1	0	0	0	1	1	1	2	0	3	0	4	0	0	2	8	0	10	4	10	7	3	5	0	0	0
chr21:33073307-33078670	33073307	33078670	0	0	0	0	0	1	0	0	0	0	0	0	1	0	1	0	0	0	2	0	0	1	0	2	2	1	0	0	7	0	0	0	5	31	12	9	0	0	1	0
chr21:37705943-37721706	37705943	37721706	0	0	0	0	0	0	0	0	0	0	0	1	0	0	0	1	0	0	0	1	0	0	0	0	1	1	1	1	2	19	10	8	5	15	7	1	0	0	0	0
chr21:37734480-37744829	75468960	75489658	0	0	2	4	0	1	0	1	0	0	1	2	1	1	0	1	1	0	2	0	1	2	1	0	3	0	0	3	0	1	0	5	16	3	7	4	7	0	5	0
chr21:40578033-40584633	40578033	40584633	1	2	4	0	2	2	0	1	2	1	0	0	1	0	0	0	3	2	1	1	5	1	2	1	2	1	2	2	6	12	6	5	19	28	10	9	5	7	0	0
chr21:46275124-46281186	92550248	92562372	0	1	2	0	0	0	1	2	2	2	0	2	1	2	1	1	3	4	1	2	4	1	0	2	4	4	5	2	2	0	0	4	5	5	19	8	0	0	0	0
chr21:47754310-47754682	95508620	95509364	0	0	0	0	0	0	0	0	0	0	0	0	1	0	1	0	2	0	1	0	0	0	0	0	3	2	1	2	2	2	0	0	6	13	9	12	0	0	0	0
chr21:47768925-47769734	95537850	95539468	0	1	1	2	0	1	3	1	5	4	6	2	1	1	0	3	3	5	11	2	12	19	13	12	19	76	7	51	65	81	48	76	106	187	108	250	61	13	75	40
chr21:47817178-47822397	47817178	47822397	0	0	0	0	0	0	0	0	0	0	0	0	0	0	0	0	0	1	0	1	1	0	0	0	0	2	2	1	3	10	0	0	3	4	2	7	0	0	0	0
chr21:47819503-47822397	47819503	47822397	0	0	0	0	0	0	0	0	0	0	0	0	0	0	0	1	2	1	0	0	0	2	1	1	4	1	2	5	4	11	0	0	17	60	16	15	2	0	0	1
chr22:21288066-21288532	21288066	21288532	3	1	3	1	2	1	0	1	2	3	0	0	4	0	1	0	0	2	0	1	2	1	1	0	8	3	0	5	9	4	0	0	8	16	33	15	13	8	3	0
chr22:22160138-22162135	22160138	22162135	1	1	0	0	0	0	0	0	0	0	0	0	1	0	0	0	3	0	1	0	0	1	2	1	9	6	1	2	4	0	0	0	9	12	18	11	22	2	3	2
chr22:30353024-30375041	30353024	30375041	0	0	0	0	0	0	0	0	0	0	0	0	0	0	0	0	0	0	0	0	0	0	1	1	2	2	3	2	3	8	0	2	3	4	4	7	1	0	1	0
chr22:30366964-30394846	60733928	60789692	0	0	0	0	0	0	0	0	0	0	0	0	0	0	0	0	0	1	0	1	2	0	0	0	0	1	2	1	8	2	0	0	7	12	15	7	7	0	0	0
chr22:30374430-30387659	60748860	60775318	2	1	0	0	0	0	0	0	0	0	1	0	0	0	1	0	1	0	0	0	2	1	0	1	4	4	0	2	2	0	0	0	2	12	15	12	3	0	6	0
chr22:32874967-32875262	32874967	32875262	0	3	1	4	0	2	5	1	1	1	2	2	2	3	1	0	3	2	1	4	2	4	3	5	2	4	0	5	7	11	7	6	1	24	8	29	0	0	0	0
chr22:32874967-32881196	32874967	32881196	2	2	0	0	0	0	0	0	0	0	0	0	0	1	1	0	1	0	1	0	1	0	1	0	3	14	2	2	11	17	1	3	11	47	45	31	0	5	14	0
chr22:35799199-35799535	35799199	35799535	0	0	0	0	0	0	0	0	0	0	0	0	0	0	0	1	0	0	0	0	0	0	0	0	0	0	0	0	5	0	0	0	2	3	7	10	5	0	0	0
chr22:38889714-38895504	38889714	38895504	0	0	0	1	0	0	0	0	0	0	0	0	0	0	0	0	0	0	0	0	2	0	2	0	3	2	2	3	2	12	2	2	6	7	16	16	2	3	6	0
chr22:38917612-38964294	77835224	77928588	1	3	4	1	5	2	3	4	4	3	2	2	2	2	2	2	1	2	3	4	0	3	2	1	1	0	0	2	0	3	0	0	0	0	3	3	0	0	0	0
chr22:41521867-41526007	41521867	41526007	0	0	0	0	0	0	0	0	0	0	0	0	0	0	0	0	0	0	0	0	1	0	0	0	2	1	0	0	0	0	12	6	3	3	3	2	0	0	0	1
chr22:41521867-41536261	41521867	41536261	0	0	0	0	0	0	0	0	0	1	1	2	0	0	1	2	2	2	2	0	6	0	6	1	3	5	1	2	12	10	0	0	4	11	4	4	11	0	2	0
chr22:41531816-41536261	83063632	83072522	0	0	0	0	0	0	0	0	0	0	0	0	0	2	0	0	0	0	1	1	3	2	1	1	1	3	3	4	8	8	0	3	10	20	41	33	7	0	12	0
chr22:41536143-41537226	41536143	41537226	0	0	0	0	0	0	0	0	0	0	0	0	0	0	0	0	0	0	0	1	1	0	0	0	0	0	0	1	1	0	0	0	5	8	5	8	0	0	0	0
chr22:41550998-41558783	41550998	41558783	0	0	0	0	0	0	0	0	0	0	0	0	0	0	0	0	0	0	0	0	0	0	0	1	1	4	1	3	2	0	1	0	14	27	32	21	17	0	7	0
chr22:41550998-41569788	41550998	41569788	0	0	0	0	0	1	0	0	0	0	0	0	0	0	0	0	0	0	0	0	1	0	2	0	3	4	4	2	4	1	2	2	3	18	2	10	3	0	3	17
chr22:41554415-41558783	83108830	83117566	0	0	0	0	0	0	0	0	0	0	0	0	0	0	0	0	0	0	0	0	0	0	0	0	0	3	0	1	7	3	12	5	1	0	14	3	0	0	0	0
chr22:41554415-41569788	83108830	83139576	0	0	0	0	0	0	0	0	0	0	0	0	0	0	0	1	0	0	0	0	1	0	0	2	2	4	1	2	1	0	21	0	10	34	30	20	12	0	18	0
chr22:41562602-41569788	41562602	41569788	0	0	0	0	0	0	0	0	0	0	0	0	0	0	0	0	0	0	0	0	1	0	0	0	4	0	0	0	1	0	1	0	8	12	7	6	0	0	0	9
chr22:41564452-41569788	83128904	83139576	0	0	0	0	0	0	0	0	0	0	0	0	0	0	0	0	0	0	0	0	0	0	0	0	2	0	0	0	1	0	0	0	6	20	6	15	4	3	0	0
chr22:41568502-41569788	41568502	41569788	0	0	0	0	0	0	0	0	0	0	0	0	0	0	0	0	0	0	2	0	1	1	1	0	1	5	1	7	6	13	28	10	13	34	8	12	7	0	13	0
chr22:47022647-47033857	47022647	47033857	2	9	2	4	0	0	0	0	0	0	0	0	0	0	1	0	0	0	0	0	0	0	0	0	0	0	0	0	0	0	0	0	1	0	0	0	0	0	0	0
chr2:100065797-100081447	200131594	200162894	0	1	1	0	0	1	1	1	0	0	0	0	0	0	1	2	0	1	0	0	0	0	0	2	2	2	1	2	1	3	0	0	9	8	11	4	0	0	5	0
chr2:106761645-106782539	106761645	106782539	3	1	3	3	3	1	0	2	0	3	2	1	2	3	2	2	3	0	1	1	0	2	1	5	0	2	0	0	3	0	0	0	0	0	5	3	3	0	0	0
chr2:109388156-109389502	218776312	218779004	1	2	2	2	0	0	0	1	0	1	0	1	0	0	2	0	1	0	3	1	0	0	1	0	3	1	2	1	2	5	0	8	5	7	34	9	1	0	1	0
chr2:113057425-113057606	226114850	226115212	0	1	1	0	0	0	2	0	1	1	3	0	2	0	1	0	4	1	1	3	1	5	6	6	0	0	0	0	1	18	0	0	2	18	5	2	0	0	0	0
chr2:120677644-120692534	120677644	120692534	0	0	0	0	0	0	0	0	1	0	0	0	0	0	0	0	1	0	0	0	0	1	0	0	0	0	0	0	0	0	0	0	5	2	11	5	2	5	0	0
chr2:120684173-120702816	120684173	120702816	0	0	0	0	0	0	0	0	0	0	0	0	0	0	0	0	1	0	1	0	0	1	1	1	0	0	1	2	2	0	0	3	15	7	6	5	5	0	4	7
chr2:120689999-120704150	120689999	120704150	0	1	1	0	0	0	0	0	0	0	1	0	1	0	1	0	0	0	0	0	0	1	1	0	0	1	0	0	0	0	0	0	6	4	2	2	0	0	0	0
chr2:136505836-136528305	136505836	136528305	0	0	0	0	0	0	0	0	1	0	0	0	0	0	0	0	0	1	0	1	0	2	0	1	3	4	0	0	3	11	15	0	16	12	11	6	0	0	6	0
chr2:136505836-136530117	136505836	136530117	0	0	3	0	1	0	0	0	0	0	0	0	0	0	1	0	1	0	0	1	0	1	0	2	1	3	1	3	3	14	0	7	16	7	13	11	12	0	9	0
chr2:148730307-148739650	148730307	148739650	0	1	0	2	0	0	2	0	1	0	1	0	1	2	0	2	0	0	0	2	0	0	1	0	4	2	0	1	1	1	0	1	3	7	5	11	0	5	2	0
chr2:15534350-15557836	15534350	15557836	1	0	0	1	0	0	0	0	0	0	0	0	0	0	2	0	2	0	0	0	2	0	1	1	3	0	0	0	4	0	0	0	11	4	4	2	8	0	4	0
chr2:15601324-15618413	15601324	15618413	4	3	4	9	2	2	3	2	2	4	3	2	3	0	0	1	5	2	2	1	1	0	2	3	2	0	0	2	2	0	0	0	6	3	14	1	0	0	8	0
chr2:15691616-15698758	15691616	15698758	0	0	0	1	0	0	0	2	1	0	0	0	0	2	0	2	1	4	0	2	1	2	0	3	0	0	0	0	2	0	0	0	4	9	6	9	0	0	5	0
chr2:160585519-160609082	160585519	160609082	0	0	0	0	0	0	0	0	0	1	1	0	0	0	0	0	1	0	0	0	0	0	0	0	1	3	0	0	0	0	0	0	4	3	2	6	0	0	3	0
chr2:160585519-160619504	160585519	160619504	0	0	0	0	0	0	0	0	0	0	0	0	0	0	0	0	0	0	0	0	0	0	0	0	0	1	0	0	4	0	0	6	8	9	13	2	0	0	2	0
chr2:160599571-160605414	321199142	321210828	0	1	0	0	0	0	1	0	0	0	0	0	0	0	0	0	1	0	1	0	1	3	0	1	6	3	0	4	2	14	0	6	7	13	31	5	10	0	12	0
chr2:170799002-170815036	170799002	170815036	0	0	0	0	0	0	0	0	0	0	0	0	0	0	0	0	1	0	0	0	0	0	0	0	0	0	0	1	0	0	0	0	2	8	8	4	7	0	0	0
chr2:172193962-172196064	172193962	172196064	1	2	0	1	1	0	1	2	1	1	0	3	0	1	0	0	1	2	2	1	0	0	0	0	0	3	1	0	0	0	13	0	7	5	8	5	0	0	0	0
chr2:172782046-172809519	172782046	172809519	1	0	3	1	1	4	1	0	2	2	3	1	2	2	2	0	1	4	1	3	0	3	2	2	1	2	2	0	0	2	0	3	6	5	29	7	0	0	9	8
chr2:173435453-173460751	173435453	173460751	0	0	0	0	0	0	0	0	0	0	0	0	0	0	1	0	1	0	0	0	2	0	0	0	3	0	0	0	0	2	0	0	6	7	15	3	0	0	0	0
chr2:175976295-175986268	175976295	175986268	1	0	0	0	0	1	0	0	0	0	0	0	0	2	1	0	0	1	0	0	2	4	0	2	0	2	2	3	4	0	0	0	3	13	14	6	14	8	17	0
chr2:191523883-191537878	191523883	191537878	7	10	3	3	0	1	2	2	1	2	0	4	0	6	0	1	0	1	2	1	0	1	0	0	0	1	0	0	1	0	0	2	0	6	0	5	0	0	0	0
chr2:191765289-191789319	191765289	191789319	3	0	0	1	1	3	2	0	0	0	0	0	0	0	0	0	0	0	0	0	0	0	0	0	0	2	0	0	0	3	0	20	4	13	5	11	0	0	0	0
chr2:197021162-197028151	197021162	197028151	0	0	0	0	0	0	0	0	0	0	0	0	0	0	1	0	0	0	0	0	0	2	1	2	0	2	0	2	4	6	0	1	7	7	19	6	4	4	3	0
chr2:201721404-201722812	201721404	201722812	0	0	0	0	0	0	0	0	0	0	0	0	0	0	0	0	0	1	0	1	0	0	0	0	3	0	0	0	0	3	0	0	5	8	2	5	4	3	4	0
chr2:201721404-201726585	201721404	201726585	0	0	0	0	0	0	0	0	0	0	0	0	0	0	0	0	0	0	0	0	0	0	0	0	0	3	0	0	2	16	0	9	10	17	5	6	0	0	6	0
chr2:202208892-202216174	404417784	404432348	0	0	0	0	0	1	0	0	1	0	0	1	0	1	0	0	0	1	0	0	3	0	1	3	6	4	2	3	6	1	0	4	15	23	13	13	10	8	0	11
chr2:202272125-202285429	202272125	202285429	0	0	0	0	0	0	0	0	0	0	0	0	0	1	0	0	0	1	0	0	0	0	0	0	0	0	1	1	1	6	0	0	3	15	7	3	0	0	2	0
chr2:203329531-203332412	203329531	203332412	5	1	1	2	1	0	1	0	0	1	1	2	2	1	3	1	2	2	3	3	3	2	1	0	1	1	0	5	6	11	5	0	9	22	22	10	1	0	3	0
chr2:211018218-211019335	211018218	211019335	0	0	0	0	0	0	0	0	0	0	1	0	0	0	1	0	0	1	0	0	0	4	4	3	5	4	1	3	10	23	16	11	14	25	42	10	25	0	2	1
chr2:215632205-215646233	215632205	215646233	6	1	1	5	1	3	1	0	3	1	1	4	3	2	3	3	5	8	3	4	3	1	0	0	3	0	2	0	3	0	2	4	7	24	6	8	5	0	7	0
chr2:220077108-220079804	440154216	440159608	0	0	0	0	0	0	0	0	0	1	0	0	0	1	0	0	1	0	1	2	0	2	2	1	1	8	1	5	14	0	1	0	7	2	21	6	0	1	1	0
chr2:227729319-227732034	227729319	227732034	2	0	2	0	1	1	1	1	1	0	1	3	2	0	2	3	1	1	3	4	3	1	6	5	1	4	0	5	10	1	8	11	5	34	58	11	5	0	5	0
chr2:227729319-227779067	455458638	455558134	2	2	0	0	1	2	1	0	0	2	1	1	2	2	1	3	2	5	0	5	4	6	13	7	4	7	13	10	8	11	5	5	10	42	51	28	18	2	8	12
chr2:238933982-238940895	238933982	238940895	0	0	0	1	0	0	0	0	0	0	0	0	0	0	0	1	0	1	2	2	0	0	0	0	0	3	2	3	2	5	0	0	7	2	4	12	0	0	3	0
chr2:239090705-239093928	478181410	478187856	5	3	5	1	3	0	0	3	3	4	6	1	2	3	2	5	4	4	0	4	4	2	2	3	4	7	4	8	10	8	18	11	29	26	39	20	13	1	20	0
chr2:30748452-30756180	30748452	30756180	1	0	1	1	2	3	3	0	2	3	2	3	4	3	3	1	3	3	2	1	0	0	1	1	0	1	0	3	3	4	0	0	0	6	5	0	0	1	0	0
chr2:44436348-44445676	44436348	44445676	0	0	0	0	0	0	0	1	0	0	0	0	1	0	0	0	0	1	1	1	0	1	0	0	0	0	0	0	3	0	1	0	7	6	4	4	2	0	8	0
chr2:47357079-47378654	47357079	47378654	0	0	0	0	0	0	0	0	0	0	0	0	0	0	0	0	0	0	0	0	0	0	0	0	2	0	0	0	3	1	0	0	7	13	2	4	0	0	0	0
chr2:47388861-47397903	47388861	47397903	0	0	0	0	0	0	0	0	0	0	0	0	0	0	0	0	0	0	0	0	0	0	0	0	0	1	0	0	0	7	12	0	4	6	17	3	0	0	0	0
chr2:54101475-54112912	54101475	54112912	0	0	0	0	0	0	0	0	0	0	0	0	0	0	0	0	0	0	0	0	0	0	0	0	0	1	3	0	1	2	0	0	4	7	2	2	7	7	0	0
chr2:54114395-54120097	54114395	54120097	0	0	0	0	0	0	0	0	0	0	0	0	0	0	0	0	0	0	0	0	1	0	1	1	0	0	1	0	0	6	0	17	13	20	23	17	0	0	6	5
chr2:54114395-54120936	54114395	54120936	2	0	1	1	0	0	0	0	0	0	0	0	0	0	1	0	0	0	0	0	0	0	0	2	5	2	0	2	3	7	8	9	1	6	11	3	10	0	8	0
chr2:54125006-54128696	54125006	54128696	0	0	0	0	0	0	0	0	0	0	0	0	0	0	0	0	0	0	0	0	2	0	3	3	4	3	0	3	8	2	10	0	13	13	24	7	2	0	6	0
chr2:54146287-54176420	54146287	54176420	0	0	0	0	0	0	0	0	0	0	0	0	0	0	0	0	0	0	0	0	0	0	0	0	2	2	0	2	4	4	4	9	6	16	8	6	0	0	0	1
chr2:55201830-55214834	55201830	55214834	0	0	0	0	0	0	0	0	0	0	0	0	0	0	0	0	0	0	0	0	1	0	0	0	0	2	0	0	1	0	0	0	3	6	4	4	0	0	0	0
chr2:55209650-55214834	55209650	55214834	1	1	1	1	3	0	0	0	1	1	0	0	0	1	0	0	0	1	1	0	0	0	0	0	4	2	0	6	6	4	0	0	19	19	12	28	7	6	0	6
chr2:55252221-55255356	110504442	110510712	0	0	0	0	0	0	0	0	1	0	0	0	0	0	0	0	0	0	1	0	0	1	1	2	6	5	0	4	10	6	4	9	18	39	12	22	15	0	11	0
chr2:58311223-58316858	116622446	116633716	1	0	1	0	2	0	0	0	0	0	1	0	1	1	1	1	0	2	2	1	0	3	2	2	0	2	0	0	0	11	4	12	9	17	7	6	2	6	3	0
chr2:61709514-61717911	61709514	61717911	2	1	0	1	0	0	0	0	1	4	0	0	2	1	1	0	1	4	1	1	0	1	1	0	1	0	0	1	4	1	0	0	4	4	9	2	0	8	1	0
chr2:61749745-61753656	123499490	123507312	7	3	2	4	5	3	4	3	5	0	4	2	3	5	2	3	6	4	3	7	3	6	4	6	0	0	2	3	0	6	0	9	15	12	14	13	5	11	0	0
chr2:61749745-61761038	123499490	123522076	5	7	6	7	7	6	6	5	7	4	10	9	4	7	0	8	8	11	8	9	7	10	9	7	9	6	3	19	10	20	1	39	64	42	72	46	42	9	48	10
chr2:68413599-68415822	136827198	136831644	0	0	1	0	0	0	0	1	1	0	0	0	0	0	0	1	0	0	0	0	0	0	0	0	0	4	0	4	3	8	0	11	16	28	29	7	0	0	7	0
chr2:68717321-68772444	137434642	137544888	0	2	2	2	0	1	0	2	0	0	0	0	1	0	1	0	0	0	2	0	4	0	3	1	1	4	4	4	1	0	0	1	8	4	17	10	11	10	8	0
chr2:71623270-71645769	143246540	143291538	2	1	0	2	1	0	0	3	0	0	1	3	6	2	1	3	1	4	1	0	2	2	1	3	3	1	1	0	5	0	9	10	7	30	5	9	3	0	6	0
chr2:86968049-86980681	86968049	86980681	0	2	0	0	0	1	0	0	0	0	0	1	1	0	0	0	0	1	0	1	0	0	0	1	3	7	0	2	6	3	12	0	9	13	2	16	7	0	2	0
chr2:86992149-86993147	86992149	86993147	0	0	0	1	0	0	0	0	0	0	0	1	0	3	0	0	0	0	0	0	1	0	0	0	1	1	0	2	3	0	0	0	3	3	4	6	7	0	0	0
chr2:89100615-89104394	89100615	89104394	2	0	2	1	0	0	0	0	0	1	0	0	1	1	1	1	0	1	0	2	5	4	1	2	0	1	1	0	0	9	12	3	3	10	18	7	0	0	3	0
chr2:9048750-9098771	9048750	9098771	1	2	1	0	1	0	2	0	2	1	3	1	0	0	0	0	2	2	3	2	1	1	1	1	2	1	0	2	5	9	8	0	1	2	4	5	5	0	0	0
chr2:9048750-9114564	9048750	9114564	0	0	0	0	0	0	0	0	0	0	0	0	0	0	0	0	0	0	1	0	0	0	0	0	0	0	0	0	0	0	0	0	4	2	2	2	0	0	0	0
chr2:99786012-99787892	99786012	99787892	1	2	2	1	1	2	4	0	0	1	1	3	1	1	5	2	8	4	4	1	0	4	5	2	2	0	0	1	2	0	0	7	9	2	6	3	6	0	0	0
chr3:10011402-10019130	20022804	20038260	0	0	1	0	0	0	0	0	0	0	0	0	0	0	0	0	0	0	1	1	0	1	2	0	0	0	0	1	2	0	0	0	14	6	13	2	6	0	1	0
chr3:125032151-125050082	250064302	250100164	2	1	1	2	1	1	3	0	3	0	0	5	1	3	1	1	2	2	2	2	0	1	3	2	0	5	1	2	1	2	3	0	7	7	13	6	0	0	0	0
chr3:128514202-128526514	128514202	128526514	1	1	0	1	0	0	1	0	0	0	0	0	0	0	0	0	1	1	0	0	1	0	1	0	3	1	1	3	1	1	0	0	6	5	3	25	28	5	5	0
chr3:128525214-128526514	128525214	128526514	1	0	0	1	0	0	0	0	0	0	0	0	0	0	0	0	0	0	1	0	0	0	0	0	3	1	0	0	4	0	0	0	3	9	7	2	5	0	0	0
chr3:12976947-12983365	25953894	25966730	1	2	1	1	1	1	1	0	0	0	0	1	2	0	2	2	2	5	2	1	0	0	0	0	8	12	3	2	5	0	0	0	0	21	12	9	0	0	1	10
chr3:136096501-136141886	136096501	136141886	0	0	0	0	0	0	0	0	0	0	0	0	0	0	0	0	0	0	0	0	0	1	0	0	0	0	0	1	0	3	0	7	2	6	8	3	0	0	0	0
chr3:136117590-136196254	136117590	136196254	0	0	0	0	0	0	0	0	0	0	0	0	0	0	0	0	1	0	0	0	0	0	0	0	0	0	0	0	1	0	0	0	3	7	9	3	0	0	0	0
chr3:136152397-136196254	136152397	136196254	1	0	0	0	0	0	0	0	0	0	0	0	0	0	0	0	0	0	0	1	0	0	0	0	3	3	0	0	4	8	0	0	7	2	2	4	4	0	3	0
chr3:138289159-138291774	276578318	276583548	2	0	1	2	1	1	2	4	0	0	1	2	0	1	3	0	2	0	3	0	0	1	3	2	1	1	0	1	4	4	0	0	2	12	4	4	24	3	12	0
chr3:142074242-142089462	142074242	142089462	0	0	0	0	0	0	0	0	0	0	0	0	0	0	0	0	0	0	0	0	0	0	0	0	2	0	0	1	0	0	0	0	3	8	6	3	0	0	0	0
chr3:142116170-142123918	142116170	142123918	0	1	0	0	0	0	0	0	1	1	0	0	0	0	0	0	0	0	1	0	5	2	0	2	3	3	1	3	1	4	0	32	12	31	43	15	17	10	15	18
chr3:149563797-149639014	149563797	149639014	2	1	1	3	0	1	1	1	0	1	1	0	0	1	0	1	0	4	0	1	0	2	2	2	2	2	2	3	1	7	13	0	11	6	12	19	16	9	0	0
chr3:155628480-155632359	155628480	155632359	0	0	1	0	1	0	0	0	0	1	0	1	0	1	0	0	0	0	2	0	1	1	0	1	1	0	0	0	4	2	0	3	4	7	8	2	3	5	7	5
chr3:157839891-157841780	315679782	315683560	3	7	7	2	2	3	3	3	1	0	5	1	2	4	5	1	2	3	2	9	1	1	2	0	4	0	0	1	0	13	11	9	0	0	10	6	0	0	5	0
chr3:160129707-160132305	160129707	160132305	0	0	0	0	0	0	0	0	0	0	0	0	0	0	0	0	0	0	0	0	0	0	0	0	0	0	0	0	0	2	22	0	7	8	6	2	1	0	0	0
chr3:160129707-160134203	320259414	320268406	0	0	0	1	0	0	0	0	0	1	0	0	0	1	0	0	0	0	0	0	0	1	0	1	0	0	2	1	3	0	5	3	3	5	9	2	17	0	0	0
chr3:169694733-169701041	169694733	169701041	0	0	0	0	0	0	0	0	0	0	0	0	0	0	0	0	2	0	0	0	2	1	0	1	0	1	2	3	0	3	0	0	10	2	9	2	2	0	5	1
chr3:169694733-169703653	169694733	169703653	0	0	0	0	0	0	0	0	0	0	0	1	0	0	0	0	1	0	1	0	0	0	0	1	0	1	1	4	0	6	11	8	7	4	23	5	0	0	7	0
chr3:169694733-169706147	169694733	169706147	1	0	0	0	0	0	1	0	0	0	0	1	0	1	1	0	0	1	0	0	2	1	1	0	5	5	1	2	2	5	5	0	4	23	19	13	22	2	7	0
chr3:169840378-169847340	339680756	339694680	1	0	1	1	0	1	0	0	1	0	1	0	3	0	2	0	0	1	2	1	1	0	1	3	0	0	0	3	4	1	4	0	26	14	5	4	3	0	4	0
chr3:170077486-170079217	170077486	170079217	0	0	0	1	0	0	0	0	1	0	0	1	2	0	1	0	0	0	1	1	0	0	1	0	4	0	0	0	8	9	0	1	20	4	12	11	5	2	0	0
chr3:17051165-17056403	34102330	34112806	0	2	0	0	0	0	0	0	0	1	0	0	0	0	0	0	1	0	3	1	2	3	3	1	3	6	5	9	5	4	9	8	2	12	38	26	5	1	3	0
chr3:17051165-17084441	34102330	34168882	0	0	0	0	0	0	0	0	0	0	0	0	0	0	0	0	0	0	0	0	0	0	0	0	2	0	0	0	1	2	0	0	4	2	9	3	0	6	0	0
chr3:172486796-172504364	172486796	172504364	0	1	0	0	0	0	0	0	0	1	0	0	1	0	0	0	1	0	0	0	1	0	1	0	1	0	0	0	1	0	0	0	3	3	8	4	2	0	0	0
chr3:180665652-180667131	180665652	180667131	0	0	0	0	0	1	1	0	0	1	1	0	0	0	0	0	0	0	0	0	0	0	0	0	1	5	0	4	5	9	0	7	3	15	29	15	14	0	5	0
chr3:182679013-182683541	182679013	182683541	0	0	0	0	0	0	0	0	0	0	0	0	0	0	1	0	0	0	0	0	0	0	3	0	0	0	0	0	2	1	0	0	3	5	2	2	7	0	1	0
chr3:182681668-182683541	182681668	182683541	0	0	0	1	0	0	0	0	0	0	0	0	0	0	0	0	0	0	0	0	0	0	0	0	2	1	0	0	0	2	0	0	2	4	7	4	0	0	10	0
chr3:183361267-183369064	183361267	183369064	0	1	0	0	0	0	0	0	1	0	0	0	0	0	0	0	1	0	0	0	4	2	1	0	2	1	3	3	9	4	0	1	2	9	15	11	7	0	1	9
chr3:183361267-183390272	366722534	366780544	0	0	0	0	0	0	0	0	0	0	1	0	0	1	1	0	1	3	1	0	2	0	2	2	4	7	0	0	10	11	10	0	15	19	26	9	6	0	9	0
chr3:183368083-183369064	366736166	366738128	0	0	0	0	0	0	0	1	0	0	0	1	0	0	0	1	0	0	0	0	1	0	1	1	6	7	6	7	14	3	2	8	34	32	11	30	10	3	6	0
chr3:183368083-183371877	183368083	183371877	0	0	0	0	0	0	0	0	0	0	0	0	0	0	0	0	0	0	0	1	1	1	2	2	1	4	0	0	0	10	0	7	13	19	6	16	12	4	4	0
chr3:183368083-183381430	183368083	183381430	0	0	0	0	0	0	0	0	0	0	0	0	0	0	0	0	0	0	0	0	0	0	0	0	0	6	0	3	1	3	0	2	7	11	7	5	0	0	0	0
chr3:183368083-183382827	366736166	366765654	0	0	0	0	0	0	0	0	0	0	1	0	0	0	0	0	0	0	2	0	1	0	1	2	0	7	0	2	6	10	0	7	7	23	27	8	3	7	6	0
chr3:183368083-183390272	183368083	183390272	0	0	0	0	0	0	0	1	0	0	0	0	0	0	0	0	0	0	0	0	0	2	3	3	3	10	2	3	6	33	8	7	21	36	16	12	13	0	9	0
chr3:184023555-184024622	368047110	368049244	1	0	0	0	0	0	0	0	0	0	0	0	0	0	0	0	0	0	0	0	2	0	0	2	10	2	4	4	11	8	11	7	0	27	12	11	0	0	0	0
chr3:185307901-185331196	370615802	370662392	0	0	0	0	0	0	0	0	0	0	0	0	0	0	0	0	0	0	0	0	0	1	0	0	0	0	0	0	0	0	0	3	5	3	10	2	5	0	0	0
chr3:185638891-185639914	185638891	185639914	1	3	1	3	0	0	0	0	0	0	1	0	1	0	3	0	0	1	0	0	2	1	0	4	1	5	0	7	1	16	7	0	5	6	21	18	2	0	0	0
chr3:185638891-185641772	185638891	185641772	0	1	0	0	0	0	0	0	0	1	0	1	0	0	0	0	0	0	0	0	2	0	1	0	5	12	3	3	6	12	11	0	36	67	39	35	0	5	15	0
chr3:195780288-195787118	195780288	195787118	0	0	0	1	0	0	0	0	1	0	0	0	0	0	0	0	0	0	1	0	1	0	0	2	0	7	0	3	2	1	0	6	5	3	7	2	3	2	0	0
chr3:195780288-195789516	195780288	195789516	0	0	0	0	0	0	0	0	0	1	0	1	0	0	1	0	0	0	2	0	0	0	0	2	0	0	1	0	1	0	0	0	4	4	8	3	0	0	4	0
chr3:195780288-195803993	391560576	391607986	1	0	3	3	0	1	0	4	3	3	3	5	3	2	3	3	4	9	4	7	4	11	3	16	18	78	9	44	22	112	47	17	10	149	47	52	8	16	2	0
chr3:195785154-195787118	195785154	195787118	1	0	0	0	1	0	4	1	1	2	2	0	1	1	0	0	4	0	0	0	0	1	1	0	4	0	0	1	1	1	0	0	4	5	9	5	0	0	6	0
chr3:195789452-195803993	195789452	195803993	0	0	0	0	0	0	0	0	0	0	0	0	0	0	0	0	0	3	1	0	0	0	0	1	5	14	3	4	5	10	3	17	6	48	9	15	0	0	6	14
chr3:195791179-195796439	195791179	195796439	0	0	0	0	0	1	0	0	0	1	0	1	0	1	0	1	0	2	0	1	1	1	1	1	2	2	1	0	7	3	0	5	8	18	11	10	0	1	0	0
chr3:195800800-195802231	195800800	195802231	1	1	4	6	1	5	3	1	4	4	2	3	2	1	2	3	1	4	6	5	0	1	4	6	4	4	3	14	6	9	2	13	1	25	15	44	3	0	5	0
chr3:195800800-195803993	195800800	195803993	1	0	0	0	0	0	1	1	1	0	1	0	0	1	2	0	1	2	1	0	1	0	1	1	0	7	0	1	4	0	0	0	2	14	5	3	2	0	10	0
chr3:196118683-196129890	196118683	196129890	1	2	3	0	0	1	2	1	2	0	1	0	1	1	1	4	2	0	0	1	7	3	2	1	17	3	0	6	7	8	0	7	6	39	22	32	16	9	0	7
chr3:196807921-196846401	196807921	196846401	0	1	0	0	0	1	0	0	0	0	0	0	0	0	0	1	0	0	0	0	0	0	0	0	0	0	0	0	0	0	0	0	5	6	3	8	1	0	0	0
chr3:197592293-197602646	197592293	197602646	0	4	1	0	3	0	1	0	1	0	3	1	1	0	1	2	2	1	3	1	1	1	3	0	0	6	0	1	1	8	0	3	12	7	22	11	12	20	9	0
chr3:31617887-31621588	31617887	31621588	0	2	3	1	2	0	2	1	0	0	0	0	0	0	0	0	1	1	2	1	0	0	0	0	2	2	0	1	3	3	0	0	7	14	12	3	1	2	0	0
chr3:32745359-32750312	32745359	32750312	0	0	0	0	0	0	0	0	0	0	0	0	0	0	0	0	0	0	1	1	0	0	0	0	0	0	0	0	3	2	0	0	2	4	8	3	0	0	0	0
chr3:37376543-37396678	37376543	37396678	0	0	0	1	0	0	0	0	0	0	0	0	1	0	0	0	0	0	0	0	0	0	0	0	0	1	0	1	0	0	0	0	4	9	3	3	0	0	0	0
chr3:44842941-44853781	44842941	44853781	0	0	0	0	0	0	0	0	0	0	0	0	0	0	0	0	0	1	0	0	0	0	0	1	0	0	0	0	0	0	0	0	2	5	2	5	1	0	0	0
chr3:47079155-47108608	47079155	47108608	0	1	0	2	1	0	0	2	1	0	0	0	0	1	1	2	0	1	2	1	2	3	0	1	5	2	1	0	2	0	1	0	4	8	5	7	2	0	1	1
chr3:47108559-47125872	47108559	47125872	0	0	0	0	0	0	0	0	0	0	0	0	0	0	0	0	0	0	0	0	0	0	0	0	0	1	0	0	0	2	0	0	3	2	5	2	3	0	0	0
chr3:47139444-47144913	94278888	94289826	1	1	0	1	0	0	0	0	0	0	1	0	0	1	0	0	1	0	0	0	2	1	0	2	0	0	0	0	2	0	0	3	10	5	8	2	0	0	0	10
chr3:47139444-47147610	47139444	47147610	1	1	2	0	1	0	0	2	0	2	1	0	1	0	0	1	2	1	2	0	3	3	0	2	3	3	0	8	17	16	1	22	27	42	38	26	16	1	24	5
chr3:56600621-56601081	113201242	113202162	1	1	0	1	0	0	2	0	0	0	0	1	1	0	1	6	0	0	1	0	2	2	1	1	1	0	1	1	1	5	5	3	5	5	8	7	5	0	0	0
chr3:56626997-56628056	113253994	113256112	5	3	10	5	0	4	3	1	3	2	3	2	2	1	2	6	6	1	4	3	4	5	10	1	3	7	5	6	8	24	0	17	24	24	51	15	6	5	35	13
chr3:56661064-56662642	113322128	113325284	0	0	1	1	1	1	0	2	0	1	2	0	1	0	2	1	0	0	0	0	0	0	2	0	0	1	0	1	0	1	4	3	9	4	6	2	3	0	2	0
chr3:71090478-71102924	71090478	71102924	0	0	1	0	0	0	0	1	0	0	0	1	0	0	0	0	0	0	0	0	0	1	0	1	3	1	6	3	3	0	0	0	5	2	2	10	11	0	14	0
chr3:71542576-71542706	71542576	71542706	0	0	0	0	0	0	0	0	0	0	0	0	0	0	0	0	0	0	0	0	0	0	0	0	0	0	3	2	1	2	0	0	22	22	55	16	19	7	7	0
chr3:93714717-93722752	93714717	93722752	1	3	4	2	0	0	2	1	1	3	1	0	2	3	4	2	2	3	1	0	0	1	1	3	5	4	1	3	2	5	29	8	2	12	21	4	5	0	5	0
chr4:103225473-103236987	103225473	103236987	2	2	1	1	0	3	2	3	0	1	2	2	2	8	3	3	1	1	2	1	3	2	1	1	1	0	1	1	4	3	0	0	0	4	13	0	0	0	0	0
chr4:103610730-103612114	103610730	103612114	0	0	0	0	0	0	0	0	0	0	1	0	0	0	0	0	0	0	0	0	0	0	0	0	2	0	2	1	5	4	0	0	4	8	2	5	0	0	0	0
chr4:103635594-103647840	103635594	103647840	1	2	0	2	0	0	0	1	1	0	0	0	0	1	1	0	0	0	0	0	0	0	0	0	0	0	0	0	0	0	0	5	3	5	8	2	2	0	6	0
chr4:106155053-106158508	106155053	106158508	1	1	0	0	0	1	0	2	1	0	0	0	3	4	2	2	2	2	3	2	5	2	2	2	1	4	0	9	3	8	2	12	4	4	15	13	3	0	0	9
chr4:110412482-110416012	110412482	110416012	0	2	0	0	0	0	1	0	1	0	0	0	1	1	1	1	0	1	1	2	2	0	0	1	5	4	0	1	0	0	0	0	3	2	2	9	11	0	0	5
chr4:128995614-128999117	257991228	257998234	2	5	3	5	1	0	1	4	2	1	1	1	4	3	0	0	2	2	3	2	1	1	0	2	1	2	3	3	1	8	3	6	11	0	9	11	0	0	1	0
chr4:128995614-129003460	128995614	129003460	0	0	1	1	1	0	1	1	1	0	1	0	0	0	4	3	2	0	2	0	0	4	2	1	2	1	0	2	6	15	1	0	4	16	18	4	10	0	5	0
chr4:128995614-129012667	128995614	129012667	0	1	2	0	0	1	1	0	0	0	0	0	1	0	1	0	0	0	1	0	1	4	0	0	1	1	0	0	2	1	0	3	6	5	4	7	5	0	7	0
chr4:129857809-129880932	259715618	259761864	0	1	0	0	1	0	1	1	0	1	1	0	0	0	0	0	1	1	2	0	0	1	0	0	0	5	1	1	4	10	8	13	12	1	25	6	11	0	20	1
chr4:129857809-129891623	129857809	129891623	1	0	0	1	0	1	0	0	0	0	0	0	0	1	0	1	0	4	1	0	1	1	0	2	0	0	0	1	3	4	0	0	9	9	17	6	4	6	11	0
chr4:129913321-129925031	259826642	259850062	10	4	3	7	1	7	0	4	3	2	1	1	1	2	3	5	6	10	5	1	1	6	8	4	2	7	0	3	11	15	0	10	22	52	27	26	4	8	15	0
chr4:140046317-140060651	280092634	280121302	0	1	0	0	0	2	0	2	0	0	0	0	0	1	0	2	0	3	1	3	0	3	0	0	1	3	0	1	0	2	0	0	7	8	21	10	4	0	0	0
chr4:144336629-144361535	288673258	288723070	1	0	0	0	0	0	0	0	0	0	0	0	1	0	0	0	0	0	0	0	0	0	0	1	0	2	0	0	3	0	0	0	3	4	6	11	3	2	6	0
chr4:144449020-144451679	144449020	144451679	1	0	0	0	0	0	0	0	0	0	0	0	0	1	0	0	0	0	0	0	0	0	0	3	0	1	0	0	0	0	0	0	2	9	10	6	2	0	3	0
chr4:144464661-144465125	288929322	288930250	13	12	9	9	11	12	6	8	4	6	5	5	14	13	12	12	20	28	14	26	19	18	18	26	22	79	17	35	87	135	61	127	146	253	201	198	52	14	55	19
chr4:151749331-151753128	151749331	151753128	0	1	0	0	1	0	0	0	0	0	0	0	0	0	0	0	0	0	0	0	0	0	0	0	0	0	0	2	0	0	0	0	2	18	10	7	0	0	8	0
chr4:153332454-153333681	306664908	306667362	9	17	11	21	8	14	11	12	15	17	14	13	31	19	22	29	23	29	31	22	30	23	18	33	24	43	30	39	49	45	32	63	134	184	222	179	93	70	86	25
chr4:153874650-153889249	307749300	307778498	0	0	0	0	0	0	0	0	0	0	0	0	1	0	0	1	0	0	0	0	1	0	0	0	0	0	0	0	0	3	0	0	2	13	5	2	10	0	0	0
chr4:160107793-160162520	160107793	160162520	0	0	0	0	0	0	0	0	0	0	0	0	0	0	0	0	0	0	0	0	0	0	0	0	1	4	1	1	1	1	0	8	16	7	27	6	0	0	2	0
chr4:160107793-160164943	160107793	160164943	0	0	0	0	0	0	0	0	0	0	0	0	0	0	0	0	0	0	1	1	0	0	1	0	3	1	2	2	9	2	0	0	3	24	22	9	0	0	0	0
chr4:160225493-160235920	160225493	160235920	0	0	0	0	0	1	0	0	0	0	0	2	0	0	0	3	0	0	0	1	0	0	0	0	1	8	10	9	3	12	0	8	15	49	27	33	9	0	22	0
chr4:170501992-170511960	170501992	170511960	1	2	0	0	0	0	0	0	0	1	0	0	2	0	0	0	0	0	1	0	0	1	0	0	0	2	0	0	3	9	0	6	7	6	2	3	3	0	4	0
chr4:17816475-17816981	17816475	17816981	0	0	1	0	0	1	1	1	1	0	0	0	0	1	1	1	3	2	2	3	0	0	1	1	0	0	0	1	0	1	11	0	4	0	2	0	0	0	0	0
chr4:178260936-178274882	178260936	178274882	0	1	1	0	0	0	0	0	1	0	0	1	0	0	0	0	1	0	1	0	0	0	0	0	0	0	0	0	0	0	0	0	4	2	6	2	0	0	6	0
chr4:178274461-178274882	178274461	178274882	1	1	0	2	1	1	0	1	1	1	2	1	1	0	1	0	0	5	4	2	0	2	0	4	2	8	0	2	6	8	0	16	22	37	25	28	18	1	16	13
chr4:178274461-178281831	178274461	178281831	1	0	1	2	0	1	0	1	1	1	0	0	3	2	1	1	2	1	1	0	4	1	2	7	0	4	3	6	11	6	14	6	32	23	43	20	34	19	18	0
chr4:37633006-37640126	75266012	75280252	5	0	2	1	3	4	3	1	7	5	8	1	5	9	5	5	7	12	10	11	5	11	4	9	9	9	12	11	17	2	6	13	2	33	53	33	14	6	32	1
chr4:39328182-39329376	39328182	39329376	0	0	0	1	0	3	0	0	1	0	0	0	0	0	1	1	0	0	2	1	1	2	1	0	0	3	0	0	0	0	0	0	2	13	8	3	1	0	0	0
chr4:39739039-39757359	39739039	39757359	0	1	1	0	0	0	0	1	0	0	0	0	1	0	1	0	0	1	0	1	3	0	3	0	2	0	0	3	4	7	0	0	3	10	5	2	0	0	0	0
chr4:48371865-48385801	96743730	96771602	3	2	0	2	2	4	1	3	1	3	1	2	1	0	0	0	3	3	2	2	1	1	5	2	4	17	1	6	10	10	0	0	19	25	36	17	17	15	13	0
chr4:52729602-52744020	105459204	105488040	1	1	1	3	1	0	1	3	0	0	3	0	2	1	0	0	3	2	2	0	1	2	1	2	0	1	0	0	0	3	0	7	6	4	14	5	15	0	0	0
chr4:52729602-52758017	52729602	52758017	2	2	0	3	3	0	1	4	0	2	0	0	3	0	1	2	3	3	0	2	0	1	2	4	0	2	0	0	2	4	18	9	11	11	11	4	4	7	3	0
chr4:54265896-54294350	54265896	54294350	0	1	0	1	1	0	1	0	0	1	0	0	0	0	0	0	0	0	0	0	1	0	0	1	1	2	0	2	0	0	0	0	6	6	3	3	8	0	4	0
chr4:54280781-54294350	54280781	54294350	2	0	1	2	2	1	1	1	0	1	0	1	0	1	0	1	1	3	0	1	4	2	1	0	1	4	1	6	5	0	0	0	4	7	16	4	14	4	2	5
chr4:54292038-54310270	54292038	54310270	0	0	2	2	1	0	0	2	0	1	1	0	2	0	2	0	0	0	0	1	1	2	0	1	5	3	0	0	5	0	0	4	3	18	13	7	6	0	5	0
chr4:56277780-56284152	112555560	112568304	6	7	1	2	1	1	3	2	0	0	2	1	1	3	1	1	3	4	4	3	1	0	2	1	3	5	0	0	7	4	1	0	4	16	20	6	0	0	1	0
chr4:56877577-56878151	56877577	56878151	1	0	1	0	0	0	0	0	0	0	0	0	0	0	0	0	0	0	1	0	1	0	2	0	1	1	0	1	1	2	9	4	5	2	2	4	4	0	5	0
chr4:6825911-6826411	6825911	6826411	0	0	0	0	0	0	0	0	0	0	0	1	0	0	1	0	0	0	0	0	0	0	0	0	1	1	0	0	2	0	0	0	6	4	3	9	7	0	0	0
chr4:6925099-6925838	13850198	13851676	4	4	2	3	2	1	0	0	2	0	1	0	1	0	1	1	0	0	1	0	0	0	0	0	0	0	0	0	2	0	0	0	0	1	0	0	0	0	0	0
chr4:73950965-73958017	73950965	73958017	2	1	3	4	1	2	0	2	1	4	1	2	0	5	3	1	5	3	3	2	4	5	1	0	1	7	1	4	8	9	0	0	3	22	20	5	3	0	2	0
chr4:73956383-73958017	147912766	147916034	4	4	4	1	3	1	1	1	2	3	2	3	5	0	7	5	4	1	7	1	9	3	6	9	6	17	6	8	18	12	0	4	8	28	16	29	8	3	21	0
chr4:77055327-77065626	77055327	77065626	5	2	2	0	2	1	4	0	1	2	1	3	3	2	2	2	1	4	0	0	2	2	1	2	3	5	0	2	1	0	17	0	2	13	16	12	9	0	4	9
chr4:78694234-78697546	78694234	78697546	2	1	1	1	0	0	0	0	0	0	0	0	1	0	1	0	0	1	1	0	3	0	0	0	3	3	4	3	5	4	0	12	35	31	13	24	4	0	10	8
chr4:79747190-79772210	79747190	79772210	4	1	3	7	2	1	2	0	2	0	1	0	0	3	2	0	1	1	1	2	3	3	1	0	7	10	1	5	1	11	0	0	4	61	39	10	8	7	9	0
chr4:79747190-79786874	79747190	79786874	0	0	0	0	0	1	0	0	0	0	0	0	0	0	0	0	0	0	0	0	0	0	0	0	0	0	2	0	1	0	5	0	4	2	6	6	0	1	3	0
chr4:79747190-79800045	79747190	79800045	0	2	0	0	2	0	0	0	0	0	0	0	1	0	0	0	0	0	0	0	2	2	1	1	1	3	1	1	0	7	2	5	8	8	18	2	8	6	6	0
chr4:79754735-79772210	79754735	79772210	0	0	0	0	0	1	0	0	0	0	1	0	0	0	2	2	1	0	0	0	0	0	1	0	0	3	0	2	2	0	0	0	3	2	8	2	2	0	0	0
chr4:79754735-79808438	79754735	79808438	0	0	0	0	0	0	0	0	0	0	0	0	0	0	0	0	0	0	0	0	0	0	0	0	0	0	0	0	1	0	0	0	4	7	6	3	0	0	0	0
chr4:79786710-79808438	79786710	79808438	0	0	0	0	0	0	0	0	0	0	0	0	0	0	0	0	0	0	0	0	0	0	0	0	0	0	0	2	0	0	4	0	2	12	2	2	0	0	1	0
chr4:87967317-87968746	175934634	175937492	5	2	3	4	3	1	1	2	3	2	3	2	3	8	3	6	9	7	8	2	26	8	18	18	30	21	18	33	40	31	18	22	27	85	88	53	31	11	86	4
chr4:87967317-88012981	87967317	88012981	0	0	0	0	0	0	0	0	0	1	0	0	0	0	0	0	0	1	0	1	2	0	0	1	6	0	1	4	4	1	1	0	3	9	6	8	0	0	8	0
chr4:88005271-88012981	176010542	176025962	1	0	0	0	0	0	0	3	0	1	0	1	0	0	0	1	1	0	1	2	3	3	2	3	3	10	3	31	12	5	0	5	22	38	22	114	15	0	13	0
chr4:88005271-88026997	88005271	88026997	0	0	0	0	0	0	0	0	0	0	0	0	0	0	0	0	0	0	0	0	0	0	0	0	2	2	0	4	0	0	0	1	3	5	2	5	3	0	1	0
chr4:88005274-88026997	88005274	88026997	0	0	0	0	0	0	0	0	0	0	0	0	0	0	0	0	0	0	0	0	0	0	0	0	0	5	0	7	0	0	0	1	4	3	9	2	0	0	9	0
chr4:88026779-88036451	176053558	176072902	0	1	0	0	0	0	0	0	0	0	0	0	0	0	0	0	0	0	0	0	0	0	1	0	2	2	3	3	3	1	0	0	0	2	2	2	0	0	0	0
chr4:88116475-88116842	88116475	88116842	1	1	1	2	1	2	2	0	1	1	0	1	1	0	1	0	1	1	0	0	0	0	0	3	0	0	0	3	3	1	0	0	8	15	5	4	2	0	10	0
chr5:10377909-10394897	10377909	10394897	0	0	0	0	0	0	0	0	0	0	0	0	0	0	0	0	0	0	0	0	0	0	1	0	0	0	0	1	3	0	22	0	3	7	5	7	9	2	3	0
chr5:10387105-10394897	10387105	10394897	0	0	0	0	0	0	0	0	0	0	0	0	0	0	0	0	0	1	0	0	1	0	0	0	2	2	4	3	2	4	0	3	2	4	19	8	0	7	8	4
chr5:10415599-10417516	10415599	10417516	1	1	2	0	1	1	0	0	0	0	1	0	0	0	0	4	0	0	0	1	0	0	0	1	3	2	0	1	0	2	0	0	6	3	13	3	0	0	4	0
chr5:109049220-109065214	218098440	218130428	0	1	1	3	3	1	3	3	1	1	2	2	2	3	4	1	0	3	1	1	0	0	3	0	1	1	2	5	2	2	0	0	15	17	14	6	20	0	0	0
chr5:112321531-112339774	112321531	112339774	0	0	0	0	0	1	0	0	0	0	0	0	1	1	0	0	0	1	0	3	0	1	0	1	0	0	1	2	0	1	0	0	8	9	37	3	0	0	1	0
chr5:122881110-122893258	122881110	122893258	1	2	6	5	2	1	3	0	2	2	0	1	1	0	2	0	1	3	0	1	2	2	3	2	3	2	0	1	3	3	5	11	23	14	15	7	4	0	0	8
chr5:131013395-131044965	262026790	262089930	2	1	1	2	1	1	2	2	3	0	1	2	0	0	0	2	0	0	2	3	1	1	3	1	0	3	1	2	12	5	0	0	4	19	26	17	9	0	19	0
chr5:132227855-132232932	132227855	132232932	0	0	0	0	0	0	0	0	0	0	0	0	0	0	0	0	0	0	0	0	1	0	1	1	1	2	2	3	6	1	0	0	6	7	5	14	0	0	5	12
chr5:132262812-132270633	132262812	132270633	0	0	0	0	0	0	0	0	1	0	0	0	0	0	0	0	0	0	0	0	0	0	1	0	0	0	0	0	5	0	0	3	12	6	16	8	2	0	0	0
chr5:133494145-133509713	133494145	133509713	0	0	0	0	0	0	0	0	0	0	0	0	0	0	0	0	0	1	0	0	0	1	0	1	1	5	1	3	8	3	0	14	13	18	31	16	8	0	1	0
chr5:133534776-133541822	133534776	133541822	0	0	0	0	0	1	0	0	0	0	1	0	0	0	1	0	0	0	0	0	0	0	1	0	4	8	0	1	6	7	13	2	11	5	4	4	6	6	5	0
chr5:137320945-137324004	274641890	274648008	7	3	12	6	10	8	5	5	4	2	3	6	6	5	7	4	6	6	2	8	4	7	6	5	0	3	2	8	7	10	10	22	36	48	60	38	25	15	19	9
chr5:137897268-137903411	137897268	137903411	0	1	0	1	1	0	0	0	0	0	0	0	0	0	0	0	1	0	1	0	1	0	3	1	2	0	0	2	6	1	0	0	8	5	8	4	1	0	0	0
chr5:138699447-138700432	138699447	138700432	2	2	0	0	0	0	0	3	0	0	0	0	0	0	0	0	1	2	0	0	1	1	1	1	2	1	2	5	4	9	0	1	9	24	4	10	2	0	2	0
chr5:142662132-142693733	142662132	142693733	0	0	0	0	0	0	0	0	0	0	0	0	0	0	0	0	0	0	0	0	0	0	0	0	0	1	0	2	3	1	0	3	2	12	5	3	0	6	3	4
chr5:142779220-142780417	142779220	142780417	1	1	0	0	0	0	1	0	0	0	0	0	0	0	0	0	2	0	0	0	2	2	3	0	4	7	7	8	9	11	8	16	17	44	29	33	3	5	0	1
chr5:154244751-154252211	154244751	154252211	0	0	1	0	0	0	1	0	0	0	0	0	0	0	0	0	2	0	0	0	0	0	0	0	0	2	0	2	4	2	1	0	7	5	8	17	0	0	2	0
chr5:167915606-167921655	335831212	335843310	8	9	4	2	3	4	4	6	3	4	8	4	8	6	5	11	2	3	12	8	1	7	10	11	13	21	1	1	11	23	0	11	27	71	39	13	9	0	1	0
chr5:172507587-172518404	345015174	345036808	0	0	0	0	0	0	0	0	0	0	0	0	0	0	0	0	0	0	0	0	0	1	0	1	0	1	0	0	2	5	0	0	3	3	4	2	2	3	0	0
chr5:172517317-172518404	172517317	172518404	0	0	0	0	0	0	0	0	0	0	0	0	0	0	0	0	0	0	0	0	2	1	0	0	2	4	1	0	3	17	1	0	4	5	23	3	9	0	0	0
chr5:172535626-172550205	172535626	172550205	0	0	0	0	0	0	0	0	0	0	0	0	0	0	0	0	1	0	1	0	1	2	0	1	0	5	0	6	17	8	0	1	17	25	26	22	5	11	12	20
chr5:173371969-173380275	173371969	173380275	0	0	0	0	0	0	0	0	0	0	0	1	0	1	0	0	1	2	0	0	2	0	1	0	1	9	7	3	5	6	0	7	22	12	22	10	0	0	0	0
chr5:176370335-176385155	176370335	176385155	0	0	0	0	3	0	1	0	0	0	0	0	1	1	1	1	2	0	3	0	3	4	2	2	4	1	2	4	6	2	0	0	9	13	27	11	9	1	10	0
chr5:176378474-176409624	176378474	176409624	0	0	0	0	0	0	0	0	0	0	0	0	0	0	0	0	0	0	0	0	0	1	0	0	0	0	1	2	2	1	0	0	5	4	3	2	1	0	0	0
chr5:176402396-176409624	352804792	352819248	0	1	0	0	0	0	0	0	0	0	0	1	0	0	0	0	0	0	0	0	2	2	0	1	0	6	0	1	6	0	0	4	12	4	11	30	3	0	3	0
chr5:179250857-179252226	179250857	179252226	0	0	0	0	0	0	0	0	0	0	0	0	0	0	0	0	0	0	0	0	0	0	1	0	6	3	3	2	6	0	0	0	19	20	21	15	14	3	2	1
chr5:36953719-36962376	36953719	36962376	0	0	0	0	0	1	0	0	0	0	0	0	0	0	0	0	0	0	0	1	0	1	1	0	1	0	1	0	0	0	0	0	6	9	7	7	5	0	0	0
chr5:36953719-36976504	36953719	36976504	2	0	0	0	0	0	2	1	1	0	0	0	2	0	2	0	1	6	1	0	2	4	1	3	4	9	0	3	0	9	0	0	11	13	8	5	6	0	6	0
chr5:38991050-39003724	38991050	39003724	0	0	0	1	0	0	0	0	0	0	0	0	1	1	2	0	0	1	2	2	0	0	3	2	3	2	0	1	0	9	6	0	10	9	22	4	4	3	6	0
chr5:43122140-43139411	43122140	43139411	0	1	0	0	0	0	0	0	0	1	0	1	1	0	0	0	0	2	1	0	0	0	0	0	0	1	0	2	0	0	0	0	3	5	2	2	1	0	0	0
chr5:43292575-43297268	43292575	43297268	3	1	2	1	0	0	1	1	2	1	0	0	0	1	1	0	0	2	1	1	1	3	1	1	1	4	2	4	10	13	15	0	19	33	11	4	13	2	0	0
chr5:43294157-43297268	43294157	43297268	2	0	0	0	0	1	0	0	0	0	1	0	0	0	0	0	0	0	0	0	0	2	0	2	4	3	0	1	0	0	0	0	3	2	17	6	6	2	0	0
chr5:55259179-55264224	55259179	55264224	0	0	0	0	0	0	0	0	0	0	0	0	0	0	0	0	3	0	0	0	0	1	0	2	0	0	0	2	3	0	0	1	7	2	6	7	0	0	14	7
chr5:55264103-55265683	55264103	55265683	0	0	0	1	0	0	0	0	0	0	0	0	0	0	0	0	1	0	0	0	0	2	1	0	1	1	0	2	1	0	1	10	16	4	8	2	8	0	4	1
chr5:56160560-56161804	112321120	112323608	0	4	0	0	1	0	0	0	0	0	0	0	1	1	3	0	1	1	1	0	0	1	0	0	0	2	0	0	1	2	11	4	6	9	6	5	2	1	0	0
chr5:56526672-56531859	113053344	113063718	0	0	0	0	0	0	0	0	0	0	0	0	0	0	0	0	0	0	0	0	0	0	0	0	0	0	1	0	0	0	0	0	7	9	11	7	0	0	0	0
chr5:56542126-56545403	113084252	113090806	0	0	0	0	0	1	0	0	1	0	0	0	0	0	0	0	1	1	0	1	1	0	1	0	4	2	0	1	4	14	0	0	19	8	8	12	2	4	1	0
chr5:56542126-56546968	56542126	56546968	0	0	1	1	2	0	1	1	1	0	0	0	1	1	0	2	1	1	2	4	0	2	1	2	3	6	3	2	2	4	0	5	9	21	15	10	5	0	3	4
chr5:65284462-65290692	65284462	65290692	1	0	2	0	0	0	1	0	0	2	0	0	1	2	1	1	1	2	3	1	1	1	1	3	0	3	0	0	1	2	0	0	28	3	14	6	8	0	1	0
chr5:65349233-65350779	65349233	65350779	2	2	1	0	0	1	1	1	1	2	0	0	1	1	0	3	2	0	0	1	1	3	3	2	2	2	2	0	4	12	8	7	6	24	7	3	0	0	5	0
chr5:72151600-72161556	72151600	72161556	0	0	0	0	0	0	0	0	0	0	0	0	0	0	0	0	0	0	1	1	0	0	1	0	0	0	0	0	3	1	0	9	18	16	13	5	1	0	0	0
chr5:72151600-72189362	72151600	72189362	0	0	0	0	0	0	0	0	0	0	0	0	0	0	0	0	0	0	0	0	0	0	0	0	2	0	0	0	1	0	0	0	10	13	12	4	3	0	0	0
chr5:72264324-72286691	72264324	72286691	0	0	0	0	0	0	0	0	0	0	0	0	0	0	0	0	0	0	0	0	0	0	0	0	1	0	0	0	2	2	0	8	6	3	10	3	10	0	0	0
chr5:72285253-72286691	72285253	72286691	2	0	0	2	1	0	0	0	1	1	0	1	1	1	1	1	2	1	0	1	2	5	4	1	8	19	2	12	20	13	0	17	37	42	29	43	9	25	20	3
chr5:72302271-72337142	72302271	72337142	0	0	0	0	0	0	0	0	0	0	0	0	0	0	0	0	0	1	0	0	0	1	0	0	1	2	1	0	3	10	6	3	10	16	2	12	0	0	0	0
chr5:72347175-72364606	72347175	72364606	0	0	0	0	0	0	0	0	0	0	0	0	0	0	0	0	0	0	0	1	0	2	1	3	4	0	0	2	2	0	16	0	8	7	7	8	15	4	6	5
chr5:72347175-72383580	72347175	72383580	0	0	0	0	0	0	0	0	0	0	0	0	0	0	0	0	0	0	0	0	0	0	0	1	0	1	0	2	2	1	0	0	2	6	8	4	0	0	0	0
chr5:72354259-72373320	144708518	144746640	0	1	0	1	0	0	0	0	1	0	0	0	1	1	2	2	2	2	1	1	4	7	5	7	19	11	1	3	23	8	4	18	40	104	86	35	49	15	36	25
chr5:72370568-72373320	144741136	144746640	2	0	1	2	1	2	1	0	1	4	5	0	0	2	5	2	3	3	5	5	5	1	4	5	1	0	0	1	2	0	0	0	0	12	7	6	7	0	2	0
chr5:95091099-95099324	190182198	190198648	6	13	5	8	7	4	1	7	9	6	3	2	3	2	2	3	5	5	1	4	1	1	0	2	0	2	0	0	3	28	13	14	30	32	33	6	4	2	0	0
chr5:98215255-98217079	98215255	98217079	0	0	0	1	0	1	0	0	0	0	0	0	1	1	0	0	0	0	0	0	0	0	0	0	2	1	0	0	2	6	6	4	8	9	3	5	0	0	2	5
chr6:108984657-108986092	217969314	217972184	1	1	1	0	0	0	0	0	1	1	1	0	0	0	5	4	4	6	5	5	8	2	4	11	28	21	8	20	16	9	0	1	4	24	30	16	31	0	13	22
chr6:111726672-111793343	111726672	111793343	1	0	0	0	0	1	2	0	0	0	0	0	1	0	0	0	4	0	1	0	1	1	1	0	0	0	1	0	1	1	0	1	13	29	4	2	0	0	8	0
chr6:117010482-117013555	117010482	117013555	6	3	0	1	3	0	1	1	1	0	1	1	2	0	1	3	1	2	1	0	1	1	1	1	0	0	0	0	0	4	9	15	19	8	8	6	11	6	0	0
chr6:119569424-119628157	119569424	119628157	0	0	0	0	0	0	0	0	0	0	0	0	0	0	0	0	0	0	0	0	0	0	0	0	3	4	0	1	1	1	0	0	2	15	2	3	0	0	0	0
chr6:119611847-119628157	119611847	119628157	0	0	0	0	0	0	0	0	0	0	0	0	0	0	0	0	0	0	0	0	1	1	0	0	2	1	1	2	1	1	12	0	7	13	5	2	0	0	0	0
chr6:125366356-125379252	250732712	250758504	0	1	0	0	0	0	0	0	2	1	0	1	2	0	2	0	0	0	0	0	0	0	0	1	0	0	0	1	2	0	0	0	9	2	7	2	0	0	3	0
chr6:131466424-131490413	131466424	131490413	0	0	0	0	0	0	0	0	0	0	0	0	0	0	1	0	1	0	1	1	0	0	0	0	0	1	0	1	0	8	0	27	13	8	10	5	3	0	0	0
chr6:134301219-134305809	134301219	134305809	0	0	0	0	0	1	1	0	0	1	0	0	0	0	0	0	0	0	2	0	0	0	0	1	2	8	3	2	4	11	22	4	10	26	27	16	8	5	0	0
chr6:135360710-135363264	135360710	135363264	5	2	4	6	8	1	10	2	2	1	1	5	2	1	3	1	1	1	3	3	0	1	1	2	3	3	1	0	0	1	0	0	0	3	0	5	0	0	0	0
chr6:13579682-13584457	13579682	13584457	2	1	0	2	2	1	0	1	0	0	0	1	0	0	1	0	1	1	0	0	2	1	0	1	4	2	1	0	7	0	9	0	6	2	6	11	13	0	0	0
chr6:13632601-13644961	27265202	27289922	4	2	1	2	5	1	1	0	3	6	2	4	2	1	1	2	1	4	4	3	6	5	3	3	15	12	3	13	19	29	6	4	41	67	67	54	30	8	37	12
chr6:13639794-13644961	13639794	13644961	0	3	2	0	0	0	4	1	0	1	0	0	1	3	1	0	0	8	2	1	3	1	5	2	4	6	2	8	10	3	0	4	7	56	55	22	11	8	43	2
chr6:146125507-146127557	146125507	146127557	0	0	0	0	0	0	0	0	0	0	0	0	0	0	0	0	0	0	1	0	2	1	1	1	4	7	5	10	11	21	9	9	4	23	32	5	6	13	9	0
chr6:149699153-149700654	149699153	149700654	0	0	0	1	0	0	0	0	1	0	0	0	0	0	0	1	0	1	0	0	0	1	0	2	0	1	0	1	3	3	14	12	0	10	21	6	1	0	0	0
chr6:149833290-149847912	149833290	149847912	0	0	0	0	0	0	3	0	0	0	0	0	0	0	0	0	0	0	0	0	0	1	0	0	0	0	0	0	0	2	0	0	10	2	2	2	0	0	0	0
chr6:155095122-155116273	155095122	155116273	0	0	0	1	0	0	0	0	2	0	0	1	2	2	2	1	1	1	2	1	0	2	1	0	4	1	0	0	3	1	0	0	9	5	8	3	0	0	6	0
chr6:160103505-160109274	160103505	160109274	0	0	0	1	1	0	0	0	0	0	1	0	0	0	0	0	0	0	0	0	0	0	1	0	1	1	1	1	1	2	0	0	5	4	9	6	13	7	0	0
chr6:160467529-160469575	160467529	160469575	0	1	0	0	0	1	0	1	0	0	0	1	0	0	0	0	0	1	0	2	0	0	1	0	6	4	1	0	6	3	0	13	11	15	8	5	6	0	11	1
chr6:163876310-163899928	327752620	327799856	0	0	0	0	0	1	0	0	0	0	0	0	0	0	0	0	0	0	0	0	0	0	0	0	2	1	0	1	4	9	0	0	7	27	6	5	3	0	0	0
chr6:17648037-17669777	17648037	17669777	0	0	0	0	0	0	0	0	0	0	0	0	0	0	0	0	0	0	1	0	0	0	2	0	1	1	0	2	3	0	0	2	5	19	4	4	4	0	0	0
chr6:17665469-17669777	17665469	17669777	1	0	0	0	0	1	0	0	1	1	0	0	0	0	1	0	1	0	2	0	0	1	2	1	1	8	3	4	15	8	12	25	28	51	45	43	8	4	23	0
chr6:18236682-18258636	36473364	36517272	2	0	1	3	2	1	2	1	1	4	3	2	4	3	5	2	2	3	7	0	2	6	1	5	8	16	2	3	17	3	17	11	19	59	57	17	37	0	1	11
chr6:18249881-18258636	36499762	36517272	0	0	0	0	0	0	1	0	1	0	0	0	0	1	0	0	0	0	0	0	2	1	0	1	1	1	0	0	2	3	0	6	20	13	18	4	3	0	0	0
chr6:18255961-18258636	18255961	18258636	0	0	0	0	0	0	0	0	0	0	0	0	0	0	0	0	0	0	0	0	0	0	0	0	0	1	0	0	0	2	12	15	3	2	8	2	3	0	2	0
chr6:18256591-18258636	36513182	36517272	0	1	0	1	0	0	0	1	0	0	1	2	2	1	2	0	4	3	2	1	0	1	1	2	5	1	0	0	4	12	0	7	23	19	9	12	0	6	6	1
chr6:34614377-34622556	34614377	34622556	0	0	0	0	0	0	0	0	1	0	0	1	0	0	0	0	1	0	1	1	2	0	0	1	5	0	0	2	0	1	0	0	8	10	7	8	1	0	0	0
chr6:35586872-35610620	71173744	71221240	8	6	4	10	7	1	5	1	0	5	1	1	0	1	2	1	0	0	1	1	0	0	0	0	0	0	0	0	7	0	0	3	3	3	1	0	0	0	0	0
chr6:35825037-35840505	35825037	35840505	0	0	0	0	0	0	0	0	0	1	0	0	2	0	0	0	0	1	0	0	0	1	0	0	1	1	0	0	1	0	0	0	2	3	7	3	3	0	0	0
chr6:42541471-42574389	85082942	85148778	0	0	0	0	0	0	0	0	0	0	0	0	0	0	0	0	0	0	0	0	0	0	1	1	7	2	0	5	6	9	2	0	23	29	21	10	15	1	11	2
chr6:42559888-42562042	42559888	42562042	0	0	0	0	0	1	0	0	1	0	1	0	0	0	1	0	1	2	2	0	2	2	1	0	1	1	1	1	1	18	6	0	4	6	4	5	3	0	3	0
chr6:42579908-42585245	42579908	42585245	0	0	0	0	0	0	1	0	0	0	0	0	0	0	0	0	0	0	0	0	0	0	0	0	0	2	0	0	0	0	0	0	4	4	7	2	0	0	0	0
chr6:42627393-42633983	42627393	42633983	0	0	0	0	0	0	0	0	0	0	0	0	0	0	0	0	0	0	1	0	3	1	2	3	7	1	3	5	5	3	0	6	22	23	11	16	21	8	14	3
chr6:42629921-42633983	42629921	42633983	0	0	0	0	0	0	0	0	0	0	0	0	1	0	0	0	0	0	3	0	2	1	2	1	9	7	2	1	0	11	7	3	8	6	54	6	0	0	7	1
chr6:47251673-47254331	47251673	47254331	3	3	2	2	1	0	0	2	0	1	1	0	0	0	1	0	0	0	1	0	0	1	0	0	0	0	0	1	0	0	0	0	0	0	0	0	0	0	0	0
chr6:4891946-4892613	9783892	9785226	7	9	2	10	2	8	7	5	9	7	14	8	12	13	16	13	16	6	17	16	17	17	23	21	21	20	16	33	39	9	6	13	29	72	65	95	41	15	46	37
chr6:49582399-49583484	49582399	49583484	0	0	0	1	0	0	0	0	0	1	0	0	0	0	0	0	0	2	1	1	0	0	1	0	0	1	3	1	0	1	0	0	4	4	22	3	0	0	0	0
chr6:52935854-52941341	105871708	105882682	2	2	0	1	0	0	1	0	3	0	1	0	0	2	0	2	0	2	4	3	3	5	5	8	1	2	0	9	11	8	2	0	20	21	14	23	3	0	0	0
chr6:56989531-56999668	56989531	56999668	0	0	0	0	0	0	0	0	0	1	0	0	0	2	0	0	1	1	0	2	1	0	0	1	1	2	0	1	4	13	0	1	10	10	17	11	14	0	7	0
chr6:56989531-57006893	56989531	57006893	0	0	0	0	0	0	0	0	1	1	0	0	0	0	0	2	0	0	2	1	1	0	4	1	6	1	1	3	3	4	9	9	9	7	10	13	2	12	6	5
chr6:57017018-57025950	114034036	114051900	0	0	0	1	0	0	1	0	0	0	0	0	0	0	0	2	3	2	1	0	0	2	3	0	0	1	0	3	1	6	0	0	5	7	15	5	14	0	1	1
chr6:79752559-79770535	79752559	79770535	1	0	1	1	0	0	0	0	1	0	0	1	0	0	1	2	3	0	1	1	1	2	2	3	6	1	1	0	2	1	0	0	5	24	11	6	0	0	6	0
chr7:102962378-102963241	205924756	205926482	1	1	0	0	0	0	1	1	0	1	1	0	1	0	1	1	1	1	0	0	1	0	2	1	1	2	0	4	1	8	6	13	18	11	3	7	6	0	12	0
chr7:104678572-104681470	104678572	104681470	2	0	0	0	0	0	0	0	0	0	0	0	0	0	0	0	0	0	0	0	0	0	0	0	0	0	2	0	0	3	0	9	5	5	9	6	0	1	0	0
chr7:104702610-104722244	104702610	104722244	0	0	0	0	0	0	0	0	1	0	1	0	0	0	0	0	0	2	0	0	1	0	2	2	3	2	1	0	0	1	0	6	8	8	9	6	3	0	1	0
chr7:104714065-104717880	209428130	209435760	0	0	0	0	0	0	0	1	0	0	1	1	2	0	2	0	0	2	4	1	1	1	3	1	6	4	1	3	13	30	18	8	30	26	40	14	51	6	20	16
chr7:104714065-104719410	104714065	104719410	0	0	0	0	0	0	0	0	0	0	0	0	3	0	0	1	0	0	0	1	5	1	1	2	8	4	1	2	5	14	0	0	6	29	26	7	7	6	1	0
chr7:104714065-104722244	104714065	104722244	0	0	1	1	0	0	0	1	0	0	0	0	0	0	0	0	0	0	0	1	0	1	2	0	2	1	0	0	4	1	0	0	6	6	6	5	0	0	12	0
chr7:104730455-104731761	104730455	104731761	0	0	0	0	0	0	0	0	0	0	0	0	0	0	0	0	0	0	0	0	1	0	1	1	5	3	2	5	10	7	33	20	32	18	17	30	11	0	22	0
chr7:106820323-106823046	213640646	213646092	0	0	0	0	0	0	0	0	0	0	0	0	0	0	1	0	0	0	0	0	0	0	0	0	2	4	0	0	1	0	0	16	9	12	10	2	2	0	6	0
chr7:106820323-106836596	213640646	213673192	0	0	0	0	0	0	0	0	0	0	0	0	0	0	0	0	0	0	0	0	0	2	1	0	2	5	2	2	2	3	1	3	29	22	11	7	10	6	5	0
chr7:106826245-106827126	106826245	106827126	0	0	0	0	0	0	0	0	0	0	0	0	0	0	0	0	0	0	0	0	0	0	2	0	0	4	0	0	2	0	0	0	3	5	5	2	5	0	0	0
chr7:131060182-131084192	131060182	131084192	0	1	1	1	2	0	2	0	0	3	0	0	1	1	0	1	1	2	2	1	4	4	5	3	2	6	4	1	8	37	23	12	41	53	60	24	33	4	12	8
chr7:131060182-131130662	131060182	131130662	0	0	0	0	0	0	0	0	0	0	0	0	0	0	0	0	0	0	0	0	0	0	0	0	1	0	0	1	1	0	0	0	3	5	3	2	0	0	0	0
chr7:131071878-131084192	131071878	131084192	2	1	1	0	0	0	1	1	2	1	0	0	1	2	5	2	2	1	3	1	1	4	1	2	4	7	4	2	3	8	10	20	35	12	40	5	13	0	3	0
chr7:131113791-131130662	131113791	131130662	0	0	0	0	0	1	1	0	0	0	0	1	0	0	0	0	0	0	0	0	1	1	1	2	2	1	0	0	0	5	0	2	4	7	6	2	0	0	5	0
chr7:138203933-138235925	138203933	138235925	1	0	0	1	0	0	0	0	1	0	1	1	0	0	0	1	0	0	0	0	1	0	0	0	2	3	0	1	11	2	0	0	4	4	9	5	9	0	0	7
chr7:138768525-138774505	277537050	277549010	0	0	0	0	0	0	0	0	0	0	0	0	0	0	0	0	0	0	0	0	0	0	1	2	4	4	0	2	11	8	0	0	6	11	9	21	0	6	9	0
chr7:138921750-138946487	138921750	138946487	0	0	0	0	0	0	0	0	0	0	0	0	0	0	0	0	1	0	0	0	3	0	0	1	3	1	3	5	7	8	0	4	14	16	11	7	15	15	16	0
chr7:138921750-138951149	138921750	138951149	1	0	1	0	0	0	0	0	0	0	0	0	0	0	0	0	0	0	1	0	0	2	0	0	3	1	1	1	14	19	15	4	18	14	18	7	4	0	3	20
chr7:138921750-138958156	277843500	277916312	0	0	0	0	0	1	0	0	0	0	1	0	0	0	0	0	0	0	0	0	0	0	0	0	3	1	1	1	4	2	12	13	13	12	11	6	0	10	6	0
chr7:138921750-138958820	138921750	138958820	0	1	0	0	0	0	0	0	0	0	0	0	1	0	0	0	0	0	0	0	0	0	2	0	0	0	0	0	7	10	0	0	10	2	6	8	6	0	7	0
chr7:138921750-138960893	138921750	138960893	0	0	0	0	0	0	2	0	0	0	0	0	0	0	0	0	0	0	0	0	1	1	1	0	0	1	0	0	3	2	0	2	6	5	5	4	0	0	8	0
chr7:138921750-138969320	277843500	277938640	0	1	0	0	0	0	0	0	0	0	0	0	0	0	0	0	0	0	0	0	4	2	5	1	14	6	1	4	11	8	0	7	18	11	4	13	5	0	0	21
chr7:138943233-138951149	138943233	138951149	0	0	0	0	0	0	1	0	0	0	0	0	0	0	0	0	0	0	0	0	0	0	0	1	0	0	1	0	3	0	11	0	7	8	5	2	0	0	0	0
chr7:138951078-138957186	138951078	138957186	1	0	0	1	0	1	0	1	0	1	0	1	0	0	1	1	0	1	2	0	0	6	3	1	2	8	8	7	15	1	1	20	18	18	2	22	21	0	7	16
chr7:138964063-138969320	277928126	277938640	0	1	0	0	0	0	1	0	0	0	0	0	1	0	1	0	0	0	0	0	3	3	3	2	5	4	1	4	9	6	0	2	7	12	20	22	9	0	0	0
chr7:139415730-139416814	139415730	139416814	1	1	3	1	1	0	0	2	1	3	1	1	5	3	3	6	3	3	5	6	5	5	3	11	17	13	7	9	21	2	1	0	16	28	36	15	30	2	17	0
chr7:140476711-140508795	140476711	140508795	1	0	0	0	0	0	0	0	1	0	1	0	1	0	1	1	1	0	1	0	1	3	1	0	1	1	0	1	3	2	7	0	4	2	12	7	0	0	0	0
chr7:152007050-152012423	152007050	152012423	0	1	1	2	1	2	0	2	1	1	0	1	1	2	1	4	1	3	0	3	1	1	1	1	3	8	2	7	3	2	0	0	28	23	33	32	11	6	16	0
chr7:152007050-152055760	152007050	152055760	0	0	0	0	0	0	0	0	0	0	0	0	0	0	0	0	0	0	0	0	0	0	0	0	0	2	0	1	2	4	3	3	5	2	11	6	1	0	2	0
chr7:155457868-155473602	155457868	155473602	2	1	1	2	2	1	1	3	0	2	1	0	1	1	0	0	3	3	3	1	1	3	4	2	2	5	1	3	15	11	11	1	31	40	46	21	18	25	25	2
chr7:155465560-155473602	155465560	155473602	12	13	8	11	11	4	7	2	6	7	12	4	8	10	9	4	17	9	20	12	8	23	11	15	13	31	12	15	47	62	74	43	160	176	159	99	114	28	77	13
chr7:155530223-155538296	155530223	155538296	0	0	0	0	0	0	0	0	0	0	0	0	0	0	0	0	0	0	0	1	0	1	0	0	2	3	2	2	1	4	0	0	0	3	1	7	0	0	4	0
chr7:157151240-157160177	157151240	157160177	1	0	0	0	0	0	0	0	0	0	0	0	0	0	0	0	0	0	0	0	0	0	0	1	5	8	0	5	6	9	1	3	9	25	16	10	4	0	3	0
chr7:158552176-158557544	158552176	158557544	6	6	6	7	5	6	1	4	2	2	0	2	2	3	1	1	5	3	2	3	4	3	1	3	4	1	2	3	2	0	0	1	1	6	1	7	5	0	0	0
chr7:23224688-23226765	23224688	23226765	1	1	0	0	0	0	1	0	0	0	1	0	0	1	0	0	0	1	1	0	0	2	0	0	0	0	2	1	0	1	0	2	4	2	14	2	1	0	2	0
chr7:23561325-23562051	23561325	23562051	0	0	0	0	0	0	0	0	0	0	0	0	0	0	0	0	0	0	0	0	1	0	0	1	0	1	0	0	3	2	0	0	14	5	5	3	0	0	4	0
chr7:23650789-23651172	23650789	23651172	0	1	1	0	1	2	2	0	0	1	0	0	1	0	0	0	3	0	2	0	0	1	0	0	1	1	0	1	1	0	0	0	8	2	10	5	14	0	0	0
chr7:2403266-2404164	2403266	2404164	0	0	0	0	0	0	0	0	0	0	1	0	0	0	0	0	0	0	0	0	0	0	0	0	2	1	2	1	0	3	0	0	3	8	12	7	5	0	0	0
chr7:24663284-24690331	49326568	49380662	2	1	1	1	0	4	3	0	1	1	0	1	0	1	1	1	0	0	1	0	1	0	0	0	2	0	0	0	0	0	0	0	4	6	2	3	0	0	0	0
chr7:26232114-26237352	52464228	52474704	0	0	0	0	1	0	0	1	0	0	0	0	0	2	0	0	0	0	0	0	0	1	1	0	6	7	4	8	11	42	0	12	23	109	25	22	12	0	5	0
chr7:26235466-26237352	26235466	26237352	0	0	0	0	0	0	0	0	0	0	0	0	0	0	0	0	0	0	0	0	0	0	0	0	0	0	1	2	2	2	0	0	2	11	3	2	1	0	0	0
chr7:26236020-26237352	52472040	52474704	0	1	0	0	0	1	0	0	0	0	0	0	0	0	0	0	0	0	0	0	0	0	1	0	8	35	8	3	19	46	14	12	33	101	52	24	17	3	9	0
chr7:27788136-27809453	27788136	27809453	0	0	0	0	0	0	0	0	0	0	0	0	0	0	1	0	0	0	0	0	0	1	1	1	0	0	1	0	6	9	0	13	18	12	20	2	22	0	9	0
chr7:43635499-43647999	43635499	43647999	0	0	0	0	0	0	0	0	0	0	0	0	0	0	0	0	0	0	0	0	0	0	2	0	3	1	0	1	4	10	0	9	13	17	27	4	8	0	0	0
chr7:44714009-44714867	44714009	44714867	0	1	0	0	0	0	0	0	1	1	1	0	0	0	0	0	1	0	1	0	2	0	0	1	3	1	1	1	0	1	0	0	3	5	5	3	1	0	0	0
chr7:44714009-44715748	44714009	44715748	0	0	0	0	0	0	0	0	0	0	0	0	0	0	0	0	0	0	0	0	1	0	0	0	3	2	2	5	8	0	0	0	12	4	4	8	1	0	12	0
chr7:6026389-6031688	6026389	6031688	0	0	0	0	0	1	0	0	0	0	0	0	0	0	0	0	0	1	0	0	0	0	0	0	2	2	1	7	2	11	0	0	7	4	3	9	0	4	0	3
chr7:6084192-6089676	6084192	6089676	0	0	1	1	0	0	1	1	0	0	0	0	0	1	0	1	1	1	1	0	1	0	1	0	4	9	3	1	3	9	0	6	7	51	18	21	7	6	12	0
chr7:6085701-6089676	12171402	12179352	1	2	0	2	1	0	1	1	2	1	0	0	0	0	3	0	0	1	0	0	2	0	1	2	0	1	0	1	2	12	0	15	12	36	15	13	8	0	9	5
chr7:6150755-6155154	6150755	6155154	0	0	0	1	2	0	0	0	0	0	0	0	0	2	1	0	0	0	0	0	0	0	1	0	0	2	2	2	2	0	0	0	2	5	7	4	0	0	0	0
chr7:66456123-66459328	66456123	66459328	0	1	0	2	0	0	0	1	0	0	0	0	0	0	1	0	1	0	0	0	1	0	0	1	2	2	0	1	2	7	6	9	22	25	24	3	11	0	9	0
chr7:66458203-66459328	66458203	66459328	0	0	0	1	0	0	0	0	0	1	0	0	0	0	0	0	0	1	1	0	1	0	0	1	7	2	0	1	14	13	4	7	12	17	7	20	5	0	0	0
chr7:72873865-72884813	145747730	145769626	1	2	0	2	2	1	0	0	0	1	0	1	0	0	0	0	0	0	0	2	1	0	0	0	1	0	0	0	1	7	0	0	2	10	3	2	1	0	1	0
chr7:74615370-74618329	74615370	74618329	0	0	0	1	0	0	0	0	0	0	0	0	0	0	0	0	0	1	3	0	0	0	1	0	1	8	2	1	6	0	0	4	3	18	19	9	4	0	0	0
chr7:91924202-91936970	91924202	91936970	1	0	0	1	0	0	0	0	0	2	0	0	0	0	1	0	0	0	0	0	1	0	0	0	0	0	2	0	0	0	0	0	7	10	2	5	5	0	5	0
chr7:91924202-91948826	91924202	91948826	0	0	0	0	1	0	0	1	0	0	0	0	0	0	0	0	0	0	0	0	2	0	0	0	0	1	0	1	0	0	0	0	4	3	4	2	0	0	3	0
chr7:91924202-91957214	91924202	91957214	1	2	0	2	1	1	0	0	0	0	0	0	0	0	1	0	1	1	1	1	2	2	1	0	0	0	0	0	1	1	0	2	4	5	5	4	3	7	7	0
chr7:92199136-92210917	92199136	92210917	0	0	0	0	0	0	0	0	1	0	0	0	0	0	1	0	1	0	1	0	0	1	0	1	0	0	0	0	0	0	0	0	4	8	2	2	0	0	0	0
chr7:98563318-98569568	98563318	98569568	1	0	0	0	0	0	0	0	0	1	0	0	0	0	0	0	2	0	0	1	1	0	0	0	1	2	1	4	3	0	1	0	2	3	5	7	0	2	0	3
chr7:99621041-99621930	199242082	199243860	8	5	5	4	3	5	2	2	7	5	3	8	4	7	5	6	8	4	5	8	9	6	8	12	22	13	7	13	23	19	0	0	15	57	28	34	17	1	17	0
chr8:100127927-100133673	100127927	100133673	0	0	0	0	0	0	0	0	0	0	0	0	0	0	0	0	0	0	0	0	0	0	0	0	0	0	0	0	2	0	0	0	5	4	6	5	0	0	4	0
chr8:100146859-100168971	100146859	100168971	0	0	0	0	0	0	0	0	0	0	0	0	1	0	0	0	0	0	0	0	1	1	0	1	1	0	0	1	2	2	0	9	4	12	6	4	1	0	0	0
chr8:100286425-100287482	100286425	100287482	0	0	2	0	0	0	0	0	0	0	0	0	0	0	0	0	0	0	0	0	1	0	3	1	1	4	2	4	0	0	0	1	3	9	6	16	2	0	11	0
chr8:100396435-100454863	100396435	100454863	0	0	0	0	0	0	0	0	0	1	0	0	0	0	0	0	0	0	0	0	0	0	2	0	3	0	0	3	0	6	12	6	3	5	32	5	11	0	8	0
chr8:100396435-100533238	100396435	100533238	0	0	0	0	0	0	0	0	0	0	0	0	0	0	0	0	0	1	0	1	1	0	1	0	4	2	0	0	2	4	4	0	2	4	8	9	6	7	5	15
chr8:100443764-100533238	100443764	100533238	0	0	0	0	0	0	0	0	0	1	1	0	0	0	0	0	2	0	1	1	3	4	5	3	27	6	6	5	24	9	16	9	54	40	33	34	24	25	10	14
chr8:100479641-100533238	100479641	100533238	0	0	0	0	0	0	0	0	0	0	0	0	0	0	0	0	0	0	0	0	0	0	0	0	0	3	0	5	6	0	0	0	2	4	5	2	13	0	0	0
chr8:100493826-100533238	100493826	100533238	0	0	0	0	0	0	0	0	0	0	0	0	0	0	0	0	0	0	0	0	0	1	1	0	4	1	1	1	2	9	0	3	9	8	2	10	10	0	3	0
chr8:100515063-100523740	100515063	100523740	0	0	0	1	0	0	0	0	0	0	0	0	0	0	0	0	0	0	1	0	0	0	1	2	0	4	0	0	3	0	0	0	15	9	15	5	1	6	4	0
chr8:100523331-100533238	100523331	100533238	0	0	0	0	0	0	0	0	0	0	0	0	0	0	0	0	0	0	0	0	0	0	0	0	0	0	0	0	1	0	1	0	13	10	25	6	10	0	0	0
chr8:101299728-101300495	101299728	101300495	0	0	0	0	0	0	0	0	0	0	0	0	0	0	1	0	0	0	1	0	0	0	3	0	0	2	0	0	0	0	0	1	3	11	6	3	1	0	4	0
chr8:101936182-101937267	101936182	101937267	0	0	0	0	0	0	0	0	0	1	0	0	0	0	0	0	0	0	0	0	0	0	0	0	2	1	0	1	7	2	0	0	3	9	11	3	15	0	0	0
chr8:103372298-103373854	206744596	206747708	0	2	0	2	0	0	1	1	0	0	2	0	0	0	0	3	4	0	0	1	0	2	2	2	10	5	7	4	2	12	0	7	11	15	15	9	0	0	6	0
chr8:103850971-103855975	103850971	103855975	0	1	0	0	0	0	1	0	0	0	0	0	0	0	0	0	0	0	0	1	0	0	0	1	1	0	0	1	0	7	0	0	8	5	6	5	0	0	0	0
chr8:117668094-117671219	117668094	117671219	1	1	0	0	1	0	2	0	0	1	0	0	1	1	1	1	3	0	0	2	0	2	1	1	0	3	2	2	0	1	0	3	3	5	5	4	12	0	9	0
chr8:124089350-124132428	124089350	124132428	2	1	0	0	0	0	1	0	0	0	1	0	0	1	3	1	0	1	1	1	1	2	1	1	0	0	0	1	0	5	0	1	13	15	8	3	0	0	6	0
chr8:124346117-124348772	124346117	124348772	0	0	0	0	1	1	0	0	1	0	0	0	1	1	0	2	3	1	0	4	0	1	2	1	2	5	0	1	3	7	1	10	13	14	18	4	9	12	7	0
chr8:124346117-124350061	124346117	124350061	0	0	1	1	2	0	0	0	1	0	0	0	0	0	0	0	0	0	1	1	0	0	1	0	0	1	2	0	1	1	0	0	4	4	14	12	0	0	1	0
chr8:131164981-131181313	262329962	262362626	1	1	0	1	0	1	0	0	0	2	1	0	3	0	0	1	3	2	3	3	0	0	2	1	5	0	1	3	10	3	23	0	9	11	14	18	1	0	3	0
chr8:131164981-131193126	262329962	262386252	3	1	2	1	5	1	2	1	6	7	2	4	7	6	9	7	10	7	11	7	4	7	9	9	17	14	7	7	27	20	26	23	57	113	129	84	87	25	41	5
chr8:131164981-131370389	131164981	131370389	0	0	0	0	0	0	0	0	0	3	1	0	0	0	0	0	1	1	2	1	0	1	0	1	0	0	1	0	3	0	0	0	5	14	2	3	2	0	1	4
chr8:131226801-131370389	262453602	262740778	0	0	0	0	0	0	0	0	1	1	0	0	0	0	0	1	0	0	0	0	0	2	1	1	4	1	1	3	3	0	0	0	7	5	12	19	0	0	6	0
chr8:17847367-17851128	17847367	17851128	0	0	0	0	0	0	0	0	0	0	0	0	0	0	0	0	0	0	1	0	0	1	0	0	0	0	0	1	1	0	0	3	6	6	2	3	11	0	4	0
chr8:17868745-17869336	35737490	35738672	1	1	1	0	0	0	0	0	0	0	0	0	0	0	1	0	0	1	1	1	0	2	3	1	2	4	0	2	5	3	0	0	10	7	23	13	2	0	4	0
chr8:21824367-21827821	21824367	21827821	0	0	0	0	0	0	0	0	0	0	0	0	0	0	0	0	0	0	0	0	0	0	0	0	0	2	0	2	3	1	0	2	4	20	14	9	4	0	2	3
chr8:21824367-21861541	21824367	21861541	0	0	0	0	0	0	0	0	0	0	0	0	0	0	0	0	0	0	0	0	0	2	0	0	4	11	4	3	4	11	8	12	6	19	6	13	2	0	0	6
chr8:21832180-21835354	21832180	21835354	0	0	0	0	0	0	0	0	0	0	0	0	0	0	0	0	0	2	2	2	1	1	4	0	4	3	1	2	2	4	0	7	7	3	25	14	7	0	1	0
chr8:21832180-21837714	43664360	43675428	0	0	0	0	0	0	0	0	0	0	0	0	0	1	0	0	1	1	3	1	4	6	6	7	10	10	9	12	12	30	17	10	43	104	129	82	34	8	87	17
chr8:21856265-21861541	21856265	21861541	0	0	0	0	0	0	0	0	0	0	0	0	0	0	0	0	0	0	0	0	0	0	0	0	1	0	0	0	1	0	8	0	3	6	8	3	0	0	0	0
chr8:26265515-26265892	26265515	26265892	0	0	0	0	0	0	0	0	1	0	0	0	0	0	0	0	0	0	0	0	0	0	0	0	3	3	0	1	1	10	5	0	2	7	7	4	3	0	0	0
chr8:37971709-37976881	75943418	75953762	3	1	1	3	0	0	2	2	0	1	1	3	1	2	1	2	5	7	6	5	5	5	6	5	5	5	4	6	17	4	0	0	16	32	34	59	15	14	24	18
chr8:38205014-38205733	38205014	38205733	0	0	0	0	0	1	0	1	0	0	1	0	0	0	0	0	0	0	0	1	0	0	0	0	0	1	0	2	1	0	13	0	5	11	3	11	17	0	4	0
chr8:41561558-41571772	83123116	83143544	0	0	0	0	0	0	0	0	0	0	0	0	0	0	0	0	0	0	0	0	1	0	0	0	7	2	2	1	0	0	0	0	3	10	5	6	2	5	0	0
chr8:41584767-41591587	41584767	41591587	0	0	1	0	0	0	0	0	0	0	0	0	0	0	0	0	1	0	0	0	0	0	0	1	1	1	2	0	16	2	4	4	3	13	0	17	1	0	0	2
chr8:52758220-52773806	105516440	105547612	0	1	1	0	0	0	0	1	0	0	0	0	0	0	0	0	0	0	0	1	0	3	6	0	6	12	4	2	3	25	20	14	32	78	113	38	35	0	22	0
chr8:52773404-52773806	105546808	105547612	1	1	3	3	0	2	3	2	2	2	1	4	4	4	3	2	8	5	6	3	3	11	21	14	14	22	18	9	36	67	44	41	163	179	196	88	76	5	62	23
chr8:54882951-54923052	54882951	54923052	1	0	0	0	0	0	0	0	0	0	0	0	0	0	1	0	0	0	0	0	1	0	0	2	0	0	1	2	3	0	0	0	7	6	9	4	7	0	0	0
chr8:54891584-54923052	109783168	109846104	1	2	0	0	0	0	0	0	1	0	1	2	1	1	0	0	0	0	0	0	4	1	9	4	5	9	4	5	5	4	4	0	35	17	38	35	21	0	25	11
chr8:54896922-54923052	54896922	54923052	0	0	1	0	0	0	0	1	0	0	0	0	0	0	0	0	2	0	0	1	3	0	1	1	5	1	1	1	8	3	0	0	35	7	30	5	17	0	5	15
chr8:62593526-62596747	62593526	62596747	4	7	0	4	0	2	1	0	4	1	1	1	0	0	1	2	0	1	2	2	1	0	5	2	3	2	2	6	4	8	7	11	3	12	12	13	14	0	0	4
chr9:100756912-100767435	201513824	201534870	0	1	0	0	0	0	0	0	0	0	0	1	0	2	3	0	0	0	0	2	0	1	4	0	0	1	2	4	0	7	5	0	4	6	11	18	1	0	14	0
chr9:110062421-110074018	110062421	110074018	0	0	0	1	0	1	0	0	0	1	0	0	2	1	0	1	1	0	1	0	0	1	1	2	5	2	1	1	8	0	0	9	4	7	18	17	15	0	2	16
chr9:114148656-114154104	114148656	114154104	6	3	7	2	1	0	0	3	0	0	0	3	1	2	2	2	6	0	0	1	1	5	1	0	0	0	1	4	8	1	0	6	4	1	3	11	0	1	9	0
chr9:115030328-115060196	115030328	115060196	0	3	1	0	2	0	0	1	0	0	0	0	0	0	0	0	1	1	0	0	0	0	0	0	0	1	2	1	0	2	0	0	4	13	3	2	3	0	0	0
chr9:128099296-128099870	256198592	256199740	2	1	0	1	2	1	1	1	1	2	1	2	1	1	2	1	4	2	3	4	3	3	0	1	8	8	1	10	23	2	0	0	7	41	25	24	1	0	16	10
chr9:128103455-128109220	128103455	128109220	1	0	0	0	0	0	0	0	0	0	0	0	0	1	0	0	0	1	1	0	0	2	1	0	1	3	2	4	6	0	0	3	3	10	9	7	2	2	4	0
chr9:138773478-138774924	277546956	277549848	4	9	11	4	5	5	4	6	2	4	3	6	4	0	4	5	1	6	4	4	5	2	0	4	4	6	2	3	4	0	0	8	3	0	5	10	2	0	0	0
chr9:33271149-33278223	33271149	33278223	0	0	0	0	0	0	0	0	1	0	0	0	0	1	1	0	0	0	1	0	1	2	0	0	0	1	0	0	0	0	0	6	3	3	2	7	4	0	2	0
chr9:33944362-33956144	67888724	67912288	1	0	0	0	3	0	0	0	1	0	1	0	0	2	1	0	0	1	2	0	1	3	0	0	1	5	0	1	3	0	0	0	5	11	2	6	12	0	8	16
chr9:33948371-33953472	33948371	33953472	1	0	1	3	0	0	0	0	1	0	1	2	3	0	0	1	0	0	0	1	2	1	2	0	0	5	0	4	7	2	0	0	5	10	16	11	0	0	28	17
chr9:33948371-33956144	33948371	33956144	2	0	1	0	2	1	0	1	4	1	0	1	1	1	0	2	0	1	1	0	0	1	3	2	12	2	2	3	10	1	2	5	8	6	19	17	16	6	11	0
chr9:33953282-33963789	67906564	67927578	2	2	3	3	2	0	2	2	4	1	1	1	1	1	1	2	1	3	3	4	4	1	3	2	1	3	0	4	2	0	0	0	9	9	8	8	3	0	10	0
chr9:33953282-33996331	33953282	33996331	1	1	2	1	1	1	0	0	0	2	1	1	1	3	0	0	1	0	0	2	1	2	0	2	3	5	2	2	7	0	0	0	3	3	4	5	0	0	3	0
chr9:33960823-33989124	33960823	33989124	0	0	2	1	0	1	1	0	2	1	0	0	0	2	0	0	0	2	0	0	0	2	1	2	1	4	0	1	4	7	9	0	7	9	21	8	4	5	2	0
chr9:33960823-33996331	33960823	33996331	2	0	0	1	0	1	0	0	0	0	0	0	3	0	2	0	0	0	0	0	1	0	0	0	0	3	0	2	3	0	0	0	15	7	11	6	1	0	6	0
chr9:33971648-33973235	67943296	67946470	2	4	5	2	1	2	2	3	2	0	1	1	1	1	0	1	5	0	1	2	2	4	10	8	4	5	1	12	0	4	0	4	16	8	7	15	0	0	0	0
chr9:33986757-34017187	33986757	34017187	0	2	1	2	0	0	0	0	0	0	0	0	3	0	1	0	2	1	1	1	2	0	2	2	1	4	0	2	4	1	11	0	14	13	5	13	9	0	2	0
chr9:34220905-34242106	34220905	34242106	0	0	0	0	0	0	0	0	0	0	0	0	0	0	0	0	0	0	0	0	1	0	2	0	2	1	0	3	12	6	0	5	3	2	7	12	4	0	6	0
chr9:37126308-37126939	37126308	37126939	0	4	4	3	1	1	1	0	0	0	0	0	0	0	0	0	1	1	0	0	2	0	2	0	0	4	0	2	2	2	0	0	9	4	3	2	8	5	0	0
chr9:4823547-4827033	4823547	4827033	3	2	1	1	0	0	1	0	0	2	3	4	0	0	1	1	4	0	2	0	1	0	0	4	0	2	0	3	3	3	0	1	11	11	13	13	0	0	6	5
chr9:6814630-6849700	6814630	6849700	0	0	0	0	0	0	0	0	0	0	0	0	0	0	0	0	0	0	0	0	0	0	0	0	0	2	2	1	2	0	12	0	2	7	4	13	7	0	0	0
chr9:6814630-6893232	6814630	6893232	1	0	0	1	0	0	0	0	0	1	0	0	0	0	0	0	0	0	1	0	0	1	1	0	5	11	3	7	10	7	0	1	14	21	41	18	7	0	8	6
chr9:6849506-6893232	6849506	6893232	1	1	2	0	0	0	0	0	0	0	0	0	0	1	0	1	0	1	1	2	0	1	1	0	0	2	0	2	1	7	0	2	5	8	4	11	2	0	0	0
chr9:6980924-6990524	6980924	6990524	0	1	0	0	0	1	0	0	0	0	1	0	0	0	0	0	1	1	1	1	0	0	0	1	4	3	1	6	6	2	0	4	5	19	47	20	11	5	6	0
chr9:77631183-77632364	155262366	155264728	0	0	1	0	0	0	2	0	2	0	1	1	1	1	0	0	0	2	1	0	1	1	0	1	0	4	1	2	3	0	0	0	14	4	8	6	4	0	6	20
chr9:79829244-79842401	79829244	79842401	0	1	1	1	0	0	1	1	0	0	1	1	0	0	0	1	0	0	1	1	2	1	0	1	0	2	1	0	0	8	1	4	10	8	23	2	0	0	1	0
chr9:86279944-86292876	86279944	86292876	0	1	0	0	0	0	0	1	0	0	0	0	0	0	0	2	0	0	0	0	0	0	1	2	4	4	1	1	7	0	0	4	3	7	15	4	5	0	0	0
chr9:86292641-86293514	86292641	86293514	1	1	0	0	0	0	0	0	0	0	0	0	0	0	0	2	0	0	2	0	0	0	1	1	6	2	2	4	9	1	0	0	3	14	17	14	0	0	11	0
chr9:86293355-86301070	172586710	172602140	0	1	1	0	0	1	0	1	0	0	0	0	2	1	0	1	0	3	1	3	2	3	1	1	5	2	1	3	9	4	1	6	18	43	44	8	14	3	17	0
chr9:86294689-86301070	86294689	86301070	1	0	0	0	0	0	1	0	0	0	0	0	3	0	1	0	1	0	1	1	1	2	1	2	2	4	0	1	1	21	48	3	4	58	32	6	6	0	0	0
chr9:88284399-88327481	88284399	88327481	0	0	1	0	0	0	2	1	0	0	0	1	0	0	0	0	1	2	1	0	0	4	4	2	0	2	1	0	4	5	0	17	14	56	24	6	4	0	13	0
chr9:88292350-88327481	88292350	88327481	0	1	0	0	0	0	0	0	0	0	0	0	0	0	0	0	0	0	0	1	1	1	0	0	2	4	0	0	0	2	0	4	4	2	15	9	1	0	0	14
chr9:88920106-88924932	88920106	88924932	1	2	0	1	1	1	0	0	0	2	0	1	0	0	2	0	5	3	1	4	0	3	5	2	4	3	1	3	7	6	6	10	37	49	40	10	23	0	1	0
chr9:88957989-88961395	177915978	177922790	1	0	0	0	0	0	0	1	0	0	0	0	0	0	0	0	0	0	0	0	0	0	1	3	1	1	1	1	11	3	0	0	13	20	22	16	25	0	6	0
chr9:91940341-91943801	91940341	91943801	0	0	0	0	0	0	0	0	0	0	0	0	0	0	0	0	0	0	0	0	0	0	0	0	0	0	0	1	6	2	0	2	5	12	4	6	3	0	0	0
chr9:95018961-95032265	95018961	95032265	1	2	3	3	1	2	3	2	1	4	0	0	1	0	1	1	5	0	6	1	3	6	6	5	4	1	8	11	18	5	0	1	4	13	17	20	1	0	0	0
chrX:10031484-10066619	20062968	20133238	1	0	0	0	1	0	0	1	1	0	3	0	1	1	2	2	6	3	9	3	25	17	18	11	80	83	32	53	105	99	83	53	164	254	302	193	147	55	95	29
chrX:123156380-123164975	123156380	123164975	0	0	0	0	0	0	0	0	0	0	0	0	0	0	1	0	0	0	0	1	3	0	0	0	1	1	0	0	3	8	12	4	9	9	0	11	6	0	6	0
chrX:123156380-123176495	123156380	123176495	0	0	0	0	0	0	0	0	0	0	0	0	0	0	0	0	0	0	0	0	0	1	0	0	0	2	0	0	0	5	5	2	6	21	4	2	0	0	8	0
chrX:130883333-130928494	130883333	130928494	15	8	11	7	16	12	9	5	11	3	2	4	3	0	1	3	3	1	1	0	1	0	0	0	0	0	0	0	0	0	0	0	0	6	0	0	10	0	0	0
chrX:134679347-134686071	134679347	134686071	1	0	0	0	0	1	2	0	0	1	0	1	0	1	0	0	3	0	1	0	0	0	1	0	2	2	3	2	3	7	0	0	0	3	10	8	2	1	0	0
chrX:134679347-134690225	134679347	134690225	2	1	6	3	2	1	1	1	2	0	2	0	0	1	1	2	2	1	4	0	0	0	1	0	5	1	0	2	1	2	0	1	20	10	15	5	0	0	2	0
chrX:13684435-13686502	13684435	13686502	0	0	0	0	0	0	0	0	0	0	0	0	0	0	0	1	3	0	3	1	4	1	0	1	0	3	4	4	3	1	0	0	3	26	21	36	4	2	11	13
chrX:13684435-13698717	27368870	27397434	1	2	0	0	0	0	0	0	0	0	1	3	4	2	1	1	3	2	4	2	2	2	3	4	7	8	6	4	15	8	0	6	5	9	48	26	8	11	22	8
chrX:13767545-13773361	13767545	13773361	0	0	0	0	1	0	0	0	0	0	0	0	0	0	0	0	0	0	0	0	0	0	0	1	1	0	0	0	5	1	0	0	4	5	3	2	0	0	0	3
chrX:153996576-153997585	153996576	153997585	0	1	0	0	0	0	0	0	0	0	0	0	0	0	0	0	0	0	1	0	0	0	0	0	1	3	1	7	1	7	0	0	6	15	5	10	0	0	3	0
chrX:154018228-154020560	308036456	308041120	1	2	3	3	2	1	1	1	4	4	2	1	1	3	0	1	1	1	1	2	5	3	2	3	8	9	10	7	10	13	0	6	7	34	38	28	8	3	9	0
chrX:16836696-16838378	16836696	16838378	0	0	0	0	0	0	0	0	0	0	1	0	0	0	0	0	0	0	0	1	0	0	0	0	1	0	1	0	2	0	0	0	3	3	3	3	4	0	0	0
chrX:41043250-41045895	41043250	41045895	0	0	0	0	0	0	1	0	0	0	0	0	0	0	0	0	0	0	0	0	0	0	0	0	0	1	0	1	0	0	1	0	3	5	16	3	0	0	0	0
chrX:44820528-44896934	44820528	44896934	0	0	0	0	0	1	0	0	0	0	0	0	0	0	0	0	0	0	0	0	0	0	0	0	2	0	0	0	0	0	0	0	7	3	12	2	0	0	0	2
chrX:67731690-67742759	67731690	67742759	0	0	0	0	0	0	0	0	0	0	0	0	0	0	0	0	1	0	1	0	0	0	1	0	1	0	1	1	0	1	0	0	6	2	2	2	0	0	0	0
chrX:70775803-70777522	70775803	70777522	0	0	1	0	0	0	0	0	0	0	0	0	0	0	0	0	0	1	0	0	0	1	1	0	0	1	0	3	2	2	0	2	7	15	3	10	7	0	0	0
chrX:70823437-70828967	70823437	70828967	0	0	0	0	0	0	0	0	0	0	0	0	0	0	0	0	0	0	0	0	0	0	1	0	0	0	0	0	10	6	0	11	5	15	7	2	2	0	9	0
chrX:70823437-70832409	70823437	70832409	0	0	0	0	0	0	0	0	0	0	0	0	0	0	0	0	0	0	0	0	0	0	0	1	4	0	0	4	7	2	0	0	14	9	14	12	4	0	0	2
chrX:77243737-77258733	77243737	77258733	1	1	0	0	1	0	1	1	0	1	0	0	0	0	0	2	0	0	1	1	2	4	2	3	6	1	0	0	2	9	0	4	5	0	2	5	0	0	0	0
chrX:77270158-77275895	154540316	154551790	0	2	2	0	1	0	0	0	0	1	0	1	0	0	0	1	0	0	1	0	0	1	0	3	0	0	1	1	4	3	0	8	8	2	5	4	4	0	8	1
chrY:15021270-15024974	15021270	15024974	1	1	3	1	0	0	4	2	1	0	1	0	1	0	1	0	0	1	0	1	0	2	1	3	0	0	0	4	10	4	9	5	7	18	28	21	4	3	0	0
chrY:2821949-2829687	2821949	2829687	3	1	3	3	0	2	0	0	2	1	3	1	0	0	0	1	3	1	0	2	1	1	3	0	2	1	2	0	2	4	0	0	5	12	2	10	0	0	0	0

## Sheet: DE HC circRNA
ID	A_d0	B_d0	C_d0	D_d0	A_d1	B_d1	C_d1	D_d1	A_d2	B_d2	C_d2	D_d2	A_d3	B_d3	C_d3	D_d3	A_d4	B_d4	C_d4	D_d4	A_d5	B_d5	C_d5	D_d5	A_d6	B_d6	C_d6	D_d6	A_d7	B_d7	C_d7	D_d7	A_d9	B_d9	C_d9	D_d9	A_d12	B_d12	C_d12	D_d12	chrom	start	end	strand	exonCount	exonSizes	exonOffsets	circType	geneName
chr14:97299803-97327072	0.472262	0.284945	0.2598	0.254989	0.197947	0.469013	0.292415	0.178821	0.465614	0.279134	0.243307	0.164977	0.30432	0.140785	0.398373	0.357339	0.279699	0.642463	0.363667	0.293534	0.0884734	0.328603	0.460603	0.468877	0.107474	1.04641	0.316358	0.692664	0.402619	3.94387	3.55555	2.76122	1.76189	1.98058	3.40185	1.59502	3.03953	5.24859	2.42163	13.3036	chr14	97299803	97327072	+	10	165,56,70,88,109,93,133,121,59,179	0,4295,12628,13790,19364,19607,21757,22663,23061,27090	circRNA	VRK1
chrX:130883333-130928494	0.372838	0.207232	0.28578	0.178493	0.527859	0.432935	0.292415	0.178821	0.393981	0.104675	0.0811023	0.164977	0.10144	0	0.0362157	0.0893347	0.093233	0.0321232	0.0303056	0	0.0294911	0	0	0	0	0	0	0	0	0	0	0	0	0.172224	0	0	0.921069	0	0	0	chrX	130883333	130928494	-	6	153,149,99,148,153,143	0,6292,7305,19243,34581,45018	circRNA	FIRRE
chr1:117944807-117963271	0.347983	0.181328	0.23382	0.280488	0.26393	0.505091	0.227434	0.286114	0.250715	0.453593	0.0811023	0.247465	0.236694	0.38716	0.470804	0.357339	0.341854	0.706709	0.454584	0.391378	0.353894	0.525765	0.460603	0.410267	0.671711	1.07812	0.885801	0.752895	1.67242	4.00102	6.03365	4.23387	3.93835	4.21949	5.56129	3.65754	4.88166	8.92259	10.3784	10.5511	chr1	117944807	117963271	+	4	256,97,119,81	0,3363,12527,18383	circRNA	MAN1A2
chr4:144464661-144465125	0.323127	0.310849	0.23382	0.22949	0.362903	0.432935	0.194944	0.286114	0.143266	0.209351	0.202756	0.206221	0.473387	0.457552	0.434588	0.357339	0.621553	0.899448	0.424278	0.847986	0.560332	0.591486	0.637758	0.761925	0.591105	2.50503	1.07562	1.05405	2.69445	7.71626	6.57237	11.6892	7.56578	7.26212	5.94585	5.44506	4.78956	2.44934	6.34237	4.35808	chr4	144464661	144465125	+	2	149.12	0.344	circRNA	SMARCA5
chr11:33307958-33309057	0.298271	0.181328	0.1299	0.22949	0.0989736	0.144312	0.194944	0.214585	0.107449	0.279134	0.243307	0.0824884	0.10144	0.140785	0.325941	0.268004	0.0310777	0.256985	0.181834	0.163074	0.147456	0.131441	0.106293	0.263743	0.107474	0.190256	0	0.150579	0.526502	0.743047	0	2.02489	1.71007	0.373153	0.88744	0.467505	2.30267	0	1.15316	0.229373	chr11	33307958	33309057	+	1	1099	0	circRNA	HIPK3
chr7:155465560-155473602	0.298271	0.336753	0.20784	0.280488	0.362903	0.144312	0.227434	0.0715284	0.214899	0.244243	0.486614	0.164977	0.270507	0.351963	0.325941	0.119113	0.52832	0.289108	0.606112	0.391378	0.235929	0.755787	0.389741	0.439572	0.34929	0.982988	0.759258	0.451737	1.45562	3.54376	7.97304	3.95775	8.29126	5.05191	4.70343	2.72253	10.5002	4.89868	8.87932	2.98185	chr7	155465560	155473602	+	3	49,77,319	0,5741,7723	circRNA	RBM33
chr16:85667519-85667738	0.273415	0.310849	0.2598	0.48448	0.26393	0.396857	0.227434	0.0715284	0.465614	0.104675	0.243307	0.536175	0.338134	0.703927	0.470804	0.446673	0.497242	0.481847	0.545501	0.847986	1.09117	0.755787	0.637758	0.791229	0.806053	1.07812	0.695987	1.44556	1.48659	0.114315	0	0	1.14005	1.23427	1.09451	3.74004	1.10528	2.62429	3.45948	2.29373	chr16	85667519	85667738	+	1	219	0	circRNA	GSE1
chr17:20107645-20109225	0.273415	0.310849	0.23382	0.560977	0.329912	0.324701	0.259925	0.286114	0.644697	0.209351	0.486614	0.536175	0.743894	0.316767	0.760529	0.50623	1.39849	0.867325	0.878862	0.750142	2.3298	1.61016	2.19672	1.67037	2.71371	1.83914	3.29012	1.98764	3.00416	6.63027	14.8686	5.79856	5.02658	3.41578	4.37804	2.33753	9.48701	8.22278	6.573	3.44059	chr17	20107645	20109225	+	1	1580	0	circRNA	SPECC1
chr16:68155889-68160513	0.248559	0.207232	0.2598	0.356985	0.296921	0.144312	0.162453	0.178821	0.214899	0.0697836	0.283858	0.412442	0.169067	0.175982	0.25351	0.148891	0.0310777	0.128493	0.181834	0.260919	0.294911	0.131441	0.248017	0.293048	0.456763	0.317093	0.442901	0.391506	0.557473	0.68589	0.107744	1.01245	0.362743	0.344449	1.03535	0.825009	0.368427	0.699811	0	2.5231	chr16	68155889	68160513	+	2	1135.16	0.4461	circRNA	NFATC3
chr4:129913321-129925031	0.248559	0.103616	0.0779401	0.178493	0.0329912	0.252545	0	0.143057	0.107449	0.0697836	0.0405512	0.0412442	0.0338134	0.0703927	0.108647	0.148891	0.186466	0.321232	0.151528	0.0326149	0.0294911	0.197162	0.283448	0.117219	0.0537368	0.221965	0	0.0903474	0.340678	0.857362	0	0.920407	1.14005	1.49261	0.798696	0.715008	0.368427	1.39962	1.72974	0	chr4	129913321	129925031	-	4	71,66,123,136	0,5707,7505,11574	circRNA	SCLT1
chr20:30954186-30956926	0.223703	0	0.0779401	0.0764968	0.164956	0.144312	0	0.0715284	0.107449	0.0697836	0.0811023	0.164977	0	0.0703927	0.0362157	0.178669	0.093233	0.0642463	0.151528	0.130459	0.206438	0.098581	0.177155	0.117219	0.161211	0.190256	0.189815	0.331274	0.464561	0.22863	0	0.460203	0.518204	0.430561	0.207069	0.797509	0.644748	0	0	0	chr20	30954186	30956926	+	2	83.112	0.2628	circRNA	ASXL1
chr4:153332454-153333681	0.223703	0.440369	0.28578	0.535478	0.26393	0.505091	0.357397	0.429171	0.537247	0.593161	0.567716	0.536175	1.04821	0.66873	0.796745	0.863569	0.714786	0.931572	0.939474	0.717527	0.884734	0.755787	0.637758	0.967058	0.644842	1.3635	1.89815	1.17452	1.51756	2.57209	3.4478	5.79856	6.94393	5.28154	6.56705	4.92256	8.56594	12.2467	9.91716	5.73432	chr4	153332454	153333681	-	2	570.5	0.1177	circRNA	FBXW7
chr12:111990083-111993723	0.198847	0.12952	0.1299	0.101996	0.230938	0.0721558	0.0974718	0.0357642	0.143266	0.0348918	0.0405512	0.0824884	0.0676268	0.0351963	0	0.0297782	0	0	0.0606112	0	0.0294911	0	0.035431	0.0879144	0	0	0	0.0301158	0.0929121	0.400102	0	1.01245	0.518204	0.114816	0.236651	0.192502	0.184214	0	0.230632	0	chr12	111990083	111993723	-	4	151,72,60,37	0,626,1878,3603	circRNA	ATXN2
chr7:99621041-99621930	0.198847	0.12952	0.1299	0.101996	0.0989736	0.18039	0.0649812	0.0715284	0.250715	0.174459	0.121653	0.329954	0.135254	0.246374	0.181078	0.178669	0.248621	0.128493	0.151528	0.260919	0.26542	0.197162	0.283448	0.351657	0.591105	0.412221	0.442901	0.391506	0.712326	1.08599	0	0	0.777306	1.63613	0.828277	0.935011	1.56582	0.174953	1.96037	0	chr7	99621041	99621930	+	3	43,381,154	0,133,735	circRNA	ZKSCAN1
chr5:167915606-167921655	0.198847	0.233137	0.10392	0.0509979	0.0989736	0.144312	0.129962	0.214585	0.107449	0.139567	0.324409	0.164977	0.270507	0.211178	0.181078	0.327561	0.0621553	0.0963695	0.363667	0.260919	0.0294911	0.230022	0.35431	0.322353	0.34929	0.665895	0.0632715	0.0301158	0.340678	1.31462	0	1.01245	1.39915	2.03799	1.15367	0.357504	0.828962	0	0.115316	0	chr5	167915606	167921655	+	4	135,189,109,101	0,4057,5292,5948	circRNA	RARS
chr2:61749745-61753656	0.173991	0.0777122	0.0519601	0.101996	0.164956	0.108234	0.129962	0.107293	0.179082	0	0.162205	0.0824884	0.10144	0.175982	0.0724314	0.0893347	0.186466	0.128493	0.0909168	0.228304	0.0884734	0.197162	0.141724	0.175829	0	0	0.126543	0.0903474	0	0.342945	0	0.828366	0.777306	0.344449	0.414139	0.357504	0.460534	1.92448	0	0	chr2	61749745	61753656	-	2	73.102	0.3809	circRNA	XPO1
chr6:4891946-4892613	0.173991	0.233137	0.0519601	0.254989	0.0659824	0.288623	0.227434	0.178821	0.322348	0.244243	0.567716	0.329954	0.405761	0.457552	0.579451	0.387117	0.497242	0.192739	0.515195	0.521838	0.501349	0.558625	0.814913	0.615401	0.564237	0.634186	1.01234	0.993822	1.20786	0.514417	0.646463	1.19653	1.50279	2.06669	1.92279	2.61253	3.77638	2.62429	5.30453	8.48679	chr6	4891946	4892613	+	1	667	0	circRNA	CDYL
chr5:137320945-137324004	0.173991	0.0777122	0.311761	0.152994	0.329912	0.288623	0.162453	0.178821	0.143266	0.0697836	0.121653	0.247465	0.20288	0.175982	0.25351	0.119113	0.186466	0.192739	0.0606112	0.260919	0.117965	0.230022	0.212586	0.146524	0	0.0951279	0.126543	0.240927	0.216795	0.571575	1.07744	2.02489	1.86553	1.37779	1.77488	1.04501	2.30267	2.62429	2.191	2.06436	chr5	137320945	137324004	-	3	133,156,42	0,2204,3017	circRNA	FAM13B
chr4:56277780-56284152	0.149135	0.181328	0.02598	0.0509979	0.0329912	0.0360779	0.0974718	0.0715284	0	0	0.0811023	0.0412442	0.0338134	0.105589	0.0362157	0.0297782	0.093233	0.128493	0.121222	0.0978446	0.0294911	0	0.070862	0.0293048	0.0806053	0.158546	0	0	0.216795	0.22863	0.107744	0	0.207282	0.459265	0.591627	0.165002	0	0	0.115316	0	chr4	56277780	56284152	+	3	226,176,183	0,5458,6189	circRNA	TMEM165
chr2:215632205-215646233	0.149135	0.0259041	0.02598	0.127495	0.0329912	0.108234	0.0324906	0	0.107449	0.0348918	0.0405512	0.164977	0.10144	0.0703927	0.108647	0.0893347	0.155388	0.256985	0.0909168	0.130459	0.0884734	0.0328603	0	0	0.0806053	0	0.126543	0	0.0929121	0	0.215488	0.368163	0.362743	0.688897	0.177488	0.220003	0.460534	0	0.807211	0	chr2	215632205	215646233	-	3	173,81,950	0,1750,13078	circRNA	BARD1
chr6:117010482-117013555	0.149135	0.0777122	0	0.0254989	0.0989736	0	0.0324906	0.0357642	0.0358165	0	0.0405512	0.0412442	0.0676268	0	0.0362157	0.0893347	0.0310777	0.0642463	0.0303056	0	0.0294911	0.0328603	0.035431	0.0293048	0	0	0	0	0	0.22863	0.969694	1.38061	0.984588	0.229632	0.236651	0.165002	1.01318	1.04972	0	0	chr6	117010482	117013555	+	3	134,102,100	0,2735,2973	circRNA	KPNA5
chr14:21698477-21702388	0.149135	0.0259041	0.0519601	0.0254989	0.0659824	0.108234	0	0.0357642	0.0358165	0.0348918	0.0811023	0.0824884	0.0338134	0.0703927	0	0.0297782	0	0.0642463	0.0909168	0.0652297	0	0	0.035431	0	0.0537368	0.221965	0.253086	0.271042	0.557473	0.22863	0	0.460203	1.08823	1.52131	0.0295813	0.742509	0.460534	0	1.15316	3.21122	chr14	21698477	21702388	-	3	48,76,277	0,678,3634	circRNA	HNRNPC
chr14:99924615-99932150	0.149135	0.0777122	0.15588	0.127495	0.230938	0.108234	0.0974718	0.143057	0.286532	0.174459	0.121653	0.247465	0.338134	0.140785	0.108647	0.208448	0.248621	0.160616	0.121222	0.163074	0.0884734	0.197162	0.141724	0.146524	0.107474	0.380511	0.0632715	0.0903474	0.309707	0.68589	0	0.368163	1.39915	1.66483	0.88744	0.687508	0.552641	2.09943	0.807211	0	chr14	99924615	99932150	-	5	257,73,149,93,111	0,834,2913,5207,7424	circRNA	SETD3
chr5:95091099-95099324	0.149135	0.336753	0.1299	0.203991	0.230938	0.144312	0.0324906	0.25035	0.322348	0.209351	0.121653	0.0824884	0.10144	0.0703927	0.0724314	0.0893347	0.155388	0.160616	0.0303056	0.130459	0.0294911	0.0328603	0	0.0586096	0	0.0634186	0	0	0.0929121	1.60041	1.40067	1.28857	1.55461	0.918529	0.976184	0.165002	0.368427	0.349906	0	0	chr5	95091099	95099324	+	2	366.113	0.8112	circRNA	RHOBTB3
chr4:77055327-77065626	0.124279	0.0518081	0.0519601	0	0.0659824	0.0360779	0.129962	0	0.0358165	0.0697836	0.0405512	0.123733	0.10144	0.0703927	0.0724314	0.0595565	0.0310777	0.128493	0	0	0.0589823	0.0657206	0.035431	0.0586096	0.0806053	0.158546	0	0.0602316	0.0309707	0	1.83164	0	0.103641	0.373153	0.473301	0.330004	0.828962	0	0.461263	2.06436	chr4	77055327	77065626	-	3	188,144,84	0,9974,10215	circRNA	NUP54
chr4:37633006-37640126	0.124279	0	0.0519601	0.0254989	0.0989736	0.144312	0.0974718	0.0357642	0.250715	0.174459	0.324409	0.0412442	0.169067	0.316767	0.181078	0.148891	0.217544	0.385478	0.303056	0.358763	0.147456	0.361464	0.141724	0.263743	0.241816	0.285384	0.759258	0.331274	0.526502	0.114315	0.646463	1.19653	0.103641	0.947233	1.56781	0.90751	1.2895	1.04972	3.69011	0.229373	chr4	37633006	37640126	-	3	139,237,58	0,3502,7062	circRNA	RELL1
chr1:41536266-41541123	0.124279	0.0777122	0	0.0254989	0.0329912	0.0360779	0.0649812	0	0.071633	0.0348918	0	0.0412442	0	0.0351963	0	0	0.0621553	0.0642463	0.181834	0.0652297	0.0884734	0.098581	0	0.0586096	0.0537368	0.158546	0.189815	0.150579	0.185824	0.22863	0	0	0.155461	0.114816	0	0.330004	1.01318	0.874764	1.61442	0	chr1	41536266	41541123	-	2	127.233	0.4624	circRNA	SCMH1
chr19:5604593-5604947	0.124279	0.0777122	0.0779401	0	0.0329912	0.0360779	0.0649812	0	0.071633	0.104675	0.162205	0.0412442	0	0.0351963	0.0362157	0.0297782	0.093233	0.0642463	0.0909168	0.0978446	0.0589823	0.0328603	0.070862	0.0293048	0	0.0951279	0.189815	0.180695	0.185824	0.743047	1.40067	0.276122	0.207282	0.516673	0.207069	0.412505	0.184214	0	0.576579	0	chr19	5604593	5604947	-	2	113.15	0.204	circRNA	SAFB2
chr1:205585605-205593019	0.124279	0.155424	0.20784	0.203991	0.131965	0.0721558	0.162453	0.178821	0	0.104675	0.202756	0.0824884	0.135254	0.105589	0.144863	0.208448	0.0621553	0.0963695	0.151528	0.0978446	0.117965	0.197162	0.070862	0.175829	0.268684	0.253674	0.126543	0.120463	0.216795	0.514417	0	1.19653	0.259102	0.545377	0.177488	0.467505	0.276321	0	1.15316	1.37624	chr1	205585605	205593019	-	4	167,117,873,216	0,2479,3488,7198	circRNA	ELK4
chr2:203329531-203332412	0.124279	0.0259041	0.02598	0.0509979	0.0329912	0	0.0324906	0	0	0.0348918	0.0405512	0.0824884	0.0676268	0.0351963	0.108647	0.0297782	0.0621553	0.0642463	0.0909168	0.0978446	0.0884734	0.0657206	0.035431	0	0.0268684	0.0317093	0	0.150579	0.185824	0.628732	0.538719	0	0.466384	0.631489	0.650789	0.275003	0.0921069	0	0.345948	0	chr2	203329531	203332412	+	2	171.171	0.271	circRNA	BMPR2
chr16:68155889-68157024	0.124279	0.12952	0.18186	0.101996	0.0659824	0.18039	0.0649812	0.0715284	0.071633	0.0348918	0.0811023	0.123733	0	0.105589	0.217294	0.0595565	0.093233	0.128493	0.0303056	0.0326149	0.26542	0.230022	0.141724	0.0879144	0.241816	0.190256	0.189815	0.0602316	0.495531	0.285787	0.323231	0.552244	0.570024	0.516673	0.473301	0.302503	0.460534	0	0	2.06436	chr16	68155889	68157024	+	1	1135	0	circRNA	NFATC3
chr12:70193988-70195501	0.124279	0.0259041	0.02598	0.0509979	0.0329912	0.0721558	0.0324906	0.0357642	0.107449	0.0697836	0.202756	0.164977	0.20288	0.105589	0	0.0893347	0.248621	0.192739	0.151528	0.163074	0.0884734	0.131441	0	0.0586096	0.241816	0.285384	0.189815	0.0602316	0.309707	0.342945	1.40067	0	0.829126	0.401857	0.177488	0.220003	0.368427	0.174953	0	0	chr12	70193988	70195501	+	2	129.113	0.14	circRNA	RAB3IP
chr1:117944807-117984947	0.124279	0.0777122	0.02598	0.0764968	0.131965	0.108234	0.162453	0.107293	0.107449	0.0697836	0.0405512	0.0824884	0.10144	0.140785	0.217294	0.178669	0.310777	0.353355	0.0303056	0.0978446	0.147456	0.164302	0.212586	0.263743	0.0806053	0.412221	0	0.240927	0.402619	0.45726	0.430975	1.74877	0.932767	1.80835	1.92279	1.43002	4.88166	0.524859	2.53695	0.917491	chr1	117944807	117984947	+	5	256,97,119,81,95	0,3363,12527,18383,40045	circRNA	MAN1A2
chr12:109046047-109048186	0.124279	0.207232	0.15588	0.152994	0.164956	0.18039	0.292415	0	0.322348	0.0348918	0.202756	0.247465	0.10144	0.0703927	0	0.178669	0.0621553	0.0642463	0.0606112	0.260919	0.235929	0.295743	0.177155	0.205134	0.483632	0.539058	0.506172	0.93359	0.86718	1.77188	0.646463	2.02489	1.08823	1.66483	1.83404	2.83253	2.85531	0	5.30453	1.37624	chr12	109046047	109048186	-	2	146.105	0.2034	circRNA	CORO1C
chr3:56626997-56628056	0.124279	0.0777122	0.2598	0.127495	0	0.144312	0.0974718	0.0357642	0.107449	0.0697836	0.121653	0.0824884	0.0676268	0.0351963	0.0724314	0.178669	0.186466	0.0321232	0.121222	0.0978446	0.117965	0.164302	0.35431	0.0293048	0.0806053	0.221965	0.316358	0.180695	0.247766	1.37178	0	1.56469	1.24369	0.688897	1.50865	0.412505	0.552641	0.874764	4.03606	2.98185	chr3	56626997	56628056	+	3	132,251,85	0,521,974	circRNA	CCDC66
chr4:87967317-87968746	0.124279	0.0518081	0.0779401	0.101996	0.0989736	0.0360779	0.0324906	0.0715284	0.107449	0.0697836	0.121653	0.0824884	0.10144	0.281571	0.108647	0.178669	0.279699	0.224862	0.242445	0.0652297	0.76677	0.262883	0.637758	0.527486	0.806053	0.665895	1.13889	0.993822	1.23883	1.77188	1.93939	2.02489	1.39915	2.43984	2.60316	1.45752	2.85531	1.92448	9.91716	0.917491	chr4	87967317	87968746	+	2	121.9	0.529	circRNA	AFF1
chr2:239090705-239093928	0.124279	0.0777122	0.1299	0.0254989	0.0989736	0	0	0.107293	0.107449	0.139567	0.243307	0.0412442	0.0676268	0.105589	0.0724314	0.148891	0.124311	0.128493	0	0.130459	0.117965	0.0657206	0.070862	0.0879144	0.107474	0.221965	0.253086	0.240927	0.309707	0.45726	1.93939	1.01245	1.50279	0.746305	1.15367	0.550006	1.19739	0.174953	2.30632	0	chr2	239090705	239093928	-	4	122,88,94,107	0,1588,1955,3116	circRNA	ILKAP
chr10:91511102-91522592	0.124279	0.0518081	0.0519601	0.152994	0.0989736	0.0721558	0.227434	0.214585	0.143266	0.104675	0.0811023	0.206221	0.10144	0.246374	0.0724314	0.0893347	0.186466	0.128493	0.303056	0.0978446	0.117965	0.230022	0.177155	0.322353	0.107474	0.317093	0.442901	0.36139	0.402619	1.65757	1.29293	2.11694	3.10922	3.07133	2.30734	1.92502	3.59217	1.22467	5.99642	8.02805	chr10	91511102	91522592	+	6	126,125,156,177,111,198	0,1221,3172,7360,9180,11292	circRNA	KIF20B
chr2:61749745-61761038	0.124279	0.181328	0.15588	0.178493	0.230938	0.216467	0.194944	0.178821	0.250715	0.139567	0.405512	0.371198	0.135254	0.246374	0	0.238226	0.248621	0.353355	0.242445	0.293534	0.206438	0.328603	0.318879	0.205134	0.241816	0.190256	0.189815	0.572201	0.309707	1.14315	0.107744	3.58959	3.31651	1.20557	2.12986	1.26501	3.86849	1.57458	5.53516	2.29373	chr2	61749745	61761038	-	3	73,102,132	0,3809,11161	circRNA	XPO1
chr11:2972488-3000467	0.0994236	0.0777122	0.1299	0.0509979	0.0659824	0.0721558	0	0.0715284	0	0.0348918	0.0405512	0.123733	0.0676268	0.105589	0.0362157	0.0297782	0.0310777	0.0642463	0	0.0326149	0.0294911	0.0657206	0.070862	0.0586096	0.0806053	0.158546	0.442901	0.120463	0.247766	1.02883	0	0.644285	0	0.487969	0.532464	0.247503	0.276321	0	2.191	3.66996	chr11	2972488	3000467	-	13	57,30,120,23,146,140,72,132,87,142,100,59,31	0,521,3268,4485,7140,8511,13421,18544,20189,20843,24765,27025,27948	circRNA	NAP1L4
chr14:21971315-21972024	0.0994236	0.0518081	0.02598	0.0509979	0.131965	0	0.0324906	0.0715284	0	0.0348918	0.0811023	0	0.0338134	0.0351963	0.0724314	0.0893347	0	0	0.0606112	0	0	0	0.035431	0	0	0.0634186	0.126543	0.120463	0.0929121	0	0	0	0.155461	0.114816	0.621208	0.302503	0.184214	0	0	0	chr14	21971315	21972024	-	2	405.218	0.491	circRNA	METTL3
chr8:62593526-62596747	0.0994236	0.181328	0	0.101996	0	0.0721558	0.0324906	0	0.143266	0.0348918	0.0405512	0.0412442	0	0	0.0362157	0.0595565	0	0.0321232	0.0606112	0.0652297	0.0294911	0	0.177155	0.0586096	0.0806053	0.0634186	0.126543	0.180695	0.123883	0.45726	0.754207	1.01245	0.155461	0.344449	0.354976	0.357504	1.2895	0	0	0.917491	chr8	62593526	62596747	-	2	69.15	0.3071	circRNA	ASPH
chr4:79747190-79772210	0.0994236	0.0259041	0.0779401	0.178493	0.0659824	0.0360779	0.0649812	0	0.071633	0	0.0405512	0	0	0.105589	0.0724314	0	0.0310777	0.0321232	0.0303056	0.0652297	0.0884734	0.098581	0.035431	0	0.188079	0.317093	0.0632715	0.150579	0.0309707	0.628732	0	0	0.207282	1.75095	1.15367	0.275003	0.736855	1.22467	1.03784	0	chr4	79747190	79772210	+	6	119,106,143,122,82,133	0,7545,16348,18891,21151,24887	circRNA	BMP2K
chr16:30675535-30677862	0.0994236	0	0.0519601	0.0254989	0	0	0	0	0	0	0	0.123733	0.10144	0.0703927	0.0362157	0	0.124311	0.128493	0.0909168	0	0.0884734	0.131441	0.106293	0.146524	0.537368	0.285384	0.316358	0.36139	0.371648	0	0	0	0.207282	0.545377	0.325395	0.357504	0.184214	0	0	0	chr16	30675535	30677862	+	6	302,206,45,96,69,30	0,500,820,1091,1423,2297	circRNA	FBRS
chr12:69644908-69656342	0.0994236	0.181328	0.10392	0	0	0.0360779	0.0324906	0.0357642	0.179082	0.0697836	0.0405512	0.123733	0.10144	0.105589	0.0362157	0.0893347	0.155388	0.0963695	0	0.0326149	0.0884734	0.098581	0.283448	0.234438	0.322421	0.507349	0.189815	0.180695	0.43359	0.571575	0.107744	0	0.259102	0.28704	0.384557	0.275003	0.184214	1.92448	1.15316	0	chr12	69644908	69656342	+	8	210,104,146,174,505,116,154,190	0,1922,5568,6603,7461,8299,8915,11244	circRNA	CPSF6
chr20:2944917-2945848	0.0994236	0.0259041	0.0519601	0	0	0	0	0	0	0.0697836	0	0	0	0	0	0	0	0.0642463	0.0303056	0.0326149	0	0.164302	0	0.0293048	0.0268684	0	0	0.0602316	0.185824	0.285787	0	0	0.259102	0.487969	0.384557	0.577507	1.10528	0.699811	1.61442	0	chr20	2944917	2945848	+	2	79.342	0.589	circRNA	PTPRA
chr4:73956383-73958017	0.0994236	0.103616	0.10392	0.0254989	0.0989736	0.0360779	0.0324906	0.0357642	0.071633	0.104675	0.0811023	0.123733	0.169067	0	0.25351	0.148891	0.124311	0.0321232	0.212139	0.0326149	0.26542	0.098581	0.212586	0.263743	0.161211	0.539058	0.379629	0.240927	0.557473	0.68589	0	0.368163	0.414563	0.803713	0.473301	0.797509	0.736855	0.524859	2.42163	0	chr4	73956383	73958017	-	1	1634	0	circRNA	ANKRD17
chr10:12039670-12056183	0.0994236	0.0777122	0.0519601	0	0.0329912	0.0360779	0.0324906	0	0.0358165	0.104675	0.0405512	0.0824884	0	0.105589	0	0.0297782	0.0621553	0.0321232	0.0606112	0.0652297	0.147456	0.164302	0.070862	0	0.107474	0.348802	0.126543	0.120463	0.154854	1.08599	2.47811	1.28857	0.518204	0.918529	0.384557	0.137502	1.01318	0.699811	1.03784	0	chr10	12039670	12056183	-	5	86,104,150,198,161	0,2234,4004,6858,16352	circRNA	UPF2
chr15:25650607-25657118	0.0994236	0.0259041	0.18186	0.127495	0	0.0360779	0.162453	0.0357642	0.143266	0.0697836	0.0405512	0.247465	0.0338134	0.0351963	0.0724314	0.119113	0.0310777	0.160616	0.242445	0.0978446	0.0884734	0.197162	0.070862	0.175829	0	0.190256	0.189815	0.0903474	0.185824	0.571575	1.07744	0.184081	0.673665	0.487969	0.473301	0.385004	0.460534	0	0.230632	0	chr15	25650607	25657118	-	3	42,120,64	0,3627,6447	circRNA	UBE3A
chr1:1158623-1159348	0.0994236	0.103616	0.10392	0	0.0329912	0.0721558	0.0649812	0.178821	0.0358165	0.0348918	0.162205	0.0412442	0	0.105589	0.289725	0	0.093233	0.160616	0.121222	0.0652297	0.147456	0.0328603	0.106293	0.146524	0.0806053	0.0317093	0.126543	0.120463	0.278736	0.914519	0	0.460203	0.725486	0.258336	0.088744	0.467505	0.0921069	0	0.922527	1.60561	chr1	1158623	1159348	-	2	114.137	0.588	circRNA	SDF4
chr10:126631025-126631876	0.0994236	0.12952	0.0779401	0.0254989	0.197947	0.0360779	0.129962	0.0715284	0.107449	0.0697836	0.0811023	0.123733	0.0338134	0.175982	0.0724314	0.0297782	0.124311	0.0642463	0	0.0652297	0.0884734	0.098581	0.106293	0.117219	0.322421	0.317093	0.126543	0.180695	0.402619	0.857362	0.215488	0.920407	2.07282	1.4352	1.15367	0.715008	1.75003	0	1.61442	1.14686	chr10	126631025	126631876	+	1	851	0	circRNA	ZRANB1
chr6:13632601-13644961	0.0994236	0.0518081	0.02598	0.0509979	0.164956	0.0360779	0.0324906	0	0.107449	0.209351	0.0811023	0.164977	0.0676268	0.0351963	0.0362157	0.0595565	0.0310777	0.128493	0.121222	0.0978446	0.176947	0.164302	0.106293	0.0879144	0.403026	0.380511	0.189815	0.391506	0.588443	1.65757	0.646463	0.368163	2.12464	1.92317	1.98195	1.48502	2.76321	1.39962	4.26669	2.75247	chr6	13632601	13644961	-	7	152,122,148,191,109,113,185	0,2061,5438,7193,8829,10109,12175	circRNA	RANBP9
chr13:33091993-33101669	0.0994236	0.12952	0.10392	0.152994	0.0989736	0.0721558	0	0	0.143266	0.104675	0.243307	0.0412442	0.135254	0.246374	0.25351	0.0595565	0.279699	0.0963695	0.303056	0.163074	0.442367	0.328603	0.70862	0.439572	0.268684	0.729314	0.632715	0.511969	0.619414	3.94387	0.430975	1.65673	3.47197	2.66948	2.98771	1.73252	5.61852	3.14915	9.34058	1.14686	chr13	33091993	33101669	-	4	147,77,89,125	0,3516,4325,9551	circRNA	N4BP2L2
chr1:117944807-117957453	0.0994236	0.181328	0.1299	0.127495	0.0659824	0.0360779	0.0324906	0.0357642	0.107449	0.0697836	0.0811023	0.123733	0.10144	0.140785	0.0724314	0.0893347	0.186466	0.385478	0.0606112	0.130459	0.147456	0.098581	0.141724	0.205134	0.241816	0.44393	0.0632715	0.331274	0.340678	2.17198	2.26262	2.76122	3.93835	2.0954	1.50865	1.29251	3.03953	2.79925	3.57479	0	chr1	117944807	117957453	+	3	256,97,119	0,3363,12527	circRNA	MAN1A2
chr3:157839891-157841780	0.0745677	0.181328	0.18186	0.0509979	0.0659824	0.108234	0.0974718	0.107293	0.0358165	0	0.202756	0.0412442	0.0676268	0.140785	0.181078	0.0297782	0.0621553	0.0963695	0.0606112	0.293534	0.0294911	0.0328603	0.070862	0	0.107474	0	0	0.0301158	0	0.743047	1.18518	0.828366	0	0	0.295813	0.165002	0	0	0.576579	0	chr3	157839891	157841780	+	2	196.126	0.1763	circRNA	RSRC1
chr1:27056141-27059283	0.0745677	0.12952	0.0779401	0.0509979	0.0989736	0.0721558	0.162453	0.0715284	0.0358165	0.0348918	0.0811023	0.0412442	0.0338134	0.0351963	0.108647	0.0297782	0.248621	0.192739	0.0606112	0.260919	0.176947	0.0657206	0.070862	0.117219	0.403026	0.126837	0.949073	0.120463	0.247766	0.342945	0	0	0	0.401857	0.68037	0.220003	0.0921069	0	0	0	chr1	27056141	27059283	+	3	213,453,117	0,1501,3025	circRNA	ARID1A
chr10:70227879-70229920	0.0745677	0.0518081	0.0779401	0.101996	0.0659824	0.0360779	0.129962	0.107293	0.0358165	0.0697836	0.0405512	0	0.0676268	0.0703927	0.144863	0.208448	0.155388	0.0642463	0.121222	0.0978446	0.0294911	0.0657206	0.070862	0.0586096	0	0.0317093	0	0.120463	0.0309707	0	0	0	0	0.545377	0.266232	0.220003	0	0	0.345948	0	chr10	70227879	70229920	-	2	184.183	0.1858	circRNA	DNA2
chr14:50130032-50141145	0.0745677	0.0777122	0.02598	0.0509979	0.0989736	0.0721558	0	0.0357642	0.071633	0.104675	0.243307	0.0412442	0.0676268	0.0703927	0.0724314	0.0595565	0.0310777	0.160616	0.121222	0.0326149	0	0.0328603	0	0.0293048	0.0268684	0.0317093	0	0.0301158	0.0619414	0.400102	1.07744	0.828366	0.0518204	0.258336	0.207069	0.302503	0.0921069	0	0	1.37624	chr14	50130032	50141145	-	7	73,49,57,84,75,94,78	0,1311,1792,3015,6209,10808,11035	circRNA	POLE2
chr17:43552465-43553092	0.0745677	0.0518081	0.0779401	0.101996	0.0329912	0	0	0.0357642	0.071633	0.139567	0	0	0.270507	0.105589	0.0362157	0.148891	0.093233	0.224862	0.0909168	0.130459	0.26542	0.131441	0.106293	0.205134	0.161211	0.221965	0.126543	0.210811	0.619414	0.0571575	0	0	0.155461	0.459265	0.502883	0.495006	1.3816	0	1.61442	0	chr17	43552465	43553092	-	1	627	0	circRNA	PLEKHM1
chr18:9931806-9937063	0.0745677	0.0777122	0.15588	0.0254989	0.0659824	0.0360779	0	0.0715284	0.0358165	0.104675	0	0	0	0.0703927	0.0724314	0	0	0.0642463	0.0606112	0.0326149	0.0294911	0	0.070862	0.0293048	0.214947	0.221965	0.0632715	0.0602316	0.0619414	0.514417	0	0.920407	0.259102	0.200928	0.177488	0.192502	1.10528	1.04972	0.115316	0	chr18	9931806	9937063	+	3	153,104,81	0,4300,5176	circRNA	VAPA
chr18:19345732-19359646	0.0745677	0.12952	0.0519601	0.101996	0.0329912	0.108234	0.0649812	0	0.107449	0.0348918	0.0405512	0.0412442	0.10144	0.0703927	0.0362157	0.0893347	0.124311	0.0963695	0.121222	0.0326149	0	0.0657206	0.106293	0.0586096	0.107474	0.126837	0.0632715	0.0903474	0.0619414	0	0	0.184081	0.310922	0.315744	0.295813	0.247503	0.552641	0	0	0	chr18	19345732	19359646	+	5	172,130,105,67,205	0,2851,7852,12331,13709	circRNA	MIB1
chr16:3900297-3901010	0.0745677	0.0259041	0.0519601	0.0254989	0.0329912	0	0.0324906	0.0357642	0.0358165	0.0348918	0	0	0.10144	0	0	0.119113	0.0310777	0.0321232	0.0303056	0.0652297	0.0294911	0	0.035431	0.0293048	0.134342	0.253674	0.126543	0.240927	0.402619	0.114315	0	0	0.310922	0.803713	0.798696	0.660008	0.921069	0	0.807211	0	chr16	3900297	3901010	-	1	713	0	circRNA	CREBBP
chr18:9931806-9950565	0.0745677	0	0.02598	0.0254989	0.0329912	0	0	0.0715284	0.0358165	0	0	0	0	0	0	0	0.0310777	0	0.0303056	0	0	0	0.070862	0.0293048	0.0806053	0.0317093	0	0.0301158	0.247766	0.743047	1.07744	0	0.362743	0.200928	0.473301	0.110001	0	0	1.03784	0	chr18	9931806	9950565	+	5	153,104,81,135,174	0,4300,5176,13114,18585	circRNA	VAPA
chr22:21288066-21288532	0.0745677	0.0259041	0.0779401	0.0254989	0.0659824	0.0360779	0	0.0357642	0.071633	0.104675	0	0	0.135254	0	0.0362157	0	0	0.0642463	0	0.0326149	0.0589823	0.0328603	0.035431	0	0.214947	0.0951279	0	0.150579	0.278736	0.22863	0	0	0.414563	0.459265	0.976184	0.412505	1.19739	1.39962	0.345948	0	chr22	21288066	21288532	+	1	466	0	circRNA	CRKL
chr15:89656955-89659752	0.0745677	0.0518081	0.10392	0.127495	0	0.0721558	0.0974718	0.107293	0.107449	0.0348918	0.0405512	0	0.0676268	0.175982	0.181078	0.0297782	0.093233	0.0642463	0.0606112	0.0326149	0.117965	0.0657206	0.106293	0.0586096	0.0537368	0.0951279	0.0632715	0.0903474	0.0619414	0	0	0	0.414563	0.258336	0.118325	0.550006	0.276321	0	0.345948	0	chr15	89656955	89659752	+	2	100.2	0.2597	circRNA	ABHD2
chr9:4823547-4827033	0.0745677	0.0518081	0.02598	0.0254989	0	0	0.0324906	0	0	0.0697836	0.121653	0.164977	0	0	0.0362157	0.0297782	0.124311	0	0.0606112	0	0.0294911	0	0	0.117219	0	0.0634186	0	0.0903474	0.0929121	0.171472	0	0.0920407	0.570024	0.315744	0.384557	0.357504	0	0	0.691895	1.14686	chr9	4823547	4827033	+	2	72.176	0.331	circRNA	RCL1
chr10:5815804-5842668	0.0745677	0.0518081	0.02598	0.0764968	0.0659824	0.0721558	0.0649812	0.0715284	0.107449	0.0348918	0.0405512	0.0412442	0.0338134	0	0.0362157	0.0893347	0	0.0642463	0	0	0	0.0328603	0.070862	0	0	0.0951279	0	0.0301158	0.0309707	0.114315	0	0.184081	0.621845	0.344449	0.0295813	0.0275003	0.736855	0	0.461263	0	chr10	5815804	5842668	-	6	100,132,199,135,100,108	0,11300,12010,21043,22921,26756	circRNA	GDI2
chr8:37971709-37976881	0.0745677	0.0259041	0.02598	0.0764968	0	0	0.0649812	0.0715284	0	0.0348918	0.0405512	0.123733	0.0338134	0.0703927	0.0362157	0.0595565	0.155388	0.224862	0.181834	0.163074	0.147456	0.164302	0.212586	0.146524	0.134342	0.158546	0.253086	0.180695	0.526502	0.22863	0	0	0.829126	0.918529	1.00577	1.62252	1.3816	2.44934	2.76758	4.12871	chr8	37971709	37976881	+	4	96,96,76,94	0,713,2458,5078	circRNA	ASH2L
chr5:43292575-43297268	0.0745677	0.0259041	0.0519601	0.0254989	0	0	0.0324906	0.0357642	0.071633	0.0348918	0	0	0	0.0351963	0.0362157	0	0	0.0642463	0.0303056	0.0326149	0.0294911	0.098581	0.035431	0.0293048	0.0268684	0.126837	0.126543	0.120463	0.309707	0.743047	1.61616	0	0.984588	0.947233	0.325395	0.110001	1.19739	0.349906	0	0	chr5	43292575	43297268	-	6	164,126,107,171,166,165	0,374,1582,2217,3278,4528	circRNA	HMGCS1
[truncated: 639 more rows]
[truncated: 3 more columns]

## Sheet: CLR
ID	CLR_D0	CLR_D1	CLR_D2	CLR_D3	CLR_D4	CLR_D5	CLR_D6	CLR_D7	CLR_D9	CLR_D12	geneName
chr10:105767934-105778666	0.00417711	0	0	0.00649789	0.00316456	0.00675676	0.0613426	0.0394737	0.27444	0	SLK
[truncated: 949 more rows]

## Sheet: ncRNA
Gene.stable.ID	A_d0_ncRNA	B_d0_ncRNA	C_d0_ncRNA	D_d0_ncRNA	A_d1_ncRNA	B_d1_ncRNA	C_d1_ncRNA	D_d1_ncRNA	A_d2_ncRNA	B_d2_ncRNA	C_d2_ncRNA	D_d2_ncRNA	A_d3_ncRNA	B_d3_ncRNA	C_d3_ncRNA	D_d3_ncRNA	A_d4_ncRNA	B_d4_ncRNA	C_d4_ncRNA	D_d4_ncRNA	A_d5_ncRNA	B_d5_ncRNA	C_d5_ncRNA	D_d5_ncRNA	A_d6_ncRNA	B_d6_ncRNA	C_d6_ncRNA	D_d6_ncRNA	A_d7_ncRNA	B_d7_ncRNA	C_d7_ncRNA	D_d7_ncRNA	A_d9_ncRNA	B_d9_ncRNA	C_d9_ncRNA	D_d9_ncRNA	A_d12_ncRNA	B_d12_ncRNA	C_d12_ncRNA	D_d12_ncRNA
[truncated: 16,883 more rows]

[truncated: 1 more sheets: mRNA]
