# Supplementary material
Source: HighWire-hosted journal article supplement (doi:10.1101/rna.078754.121)
Supplement: Supplemental_Table_S3.xlsx [file Supplemental_Table_S3.xlsx]

## Sheet: Sheet1
Nicolet et al.	Table S3: circRNA expression in in vitro megakaryoid differentiation
Tab name	Description	Unit
LC circRNA	Low confidence circRNA expression in megakaryoid differentiation	Raw counts
HC circRNA	High confidence circRNA expression in megakaryoid differentiation	circRNA reads per million mapped reads
DE HC circRNA	Differentially expressed high confidence circRNA in megakaryoid differentiation	DESeq2 output
CLR	Circular-over-linear ratio (CLR) at the circRNA junction site.	Ratio
ncRNA	non-coding RNA expression in megakaryocytes and platelets	TPM
mRNA	protein-coding RNA expression in megakaryocytes and platelets	TPM

## Sheet: LC circRNA
ID	CD42neg_1	CD42neg_2	CD42neg_3	CD42pos_1	CD42pos_2	CD42pos_3	chrom	start	end	strand	exonCount	exonSizes	exonOffsets	circType	geneName	isoformName	index	flankIntron
chr10:100481413-100503813	0	0	2	0	0	0	chr10	100481413	100503813	-	2	172.174	0.22226	circRNA	HPSE2	NM_001166246	5.4	chr10:100453704-100481413|chr10:100503813-100903994
chr10:102019974-102021820	0	2	2	1	1	0	chr10	102019974	102021820	-	3	102,79,85	0,748,1761	circRNA	CWF19L1	NM_001303404	4,3,2	chr10:102016233-102019974|chr10:102021820-102027327
chr10:102114183-102114389	3	7	0	1	0	1	chr10	102114183	102114389	+	1	206	0	circRNA	SCD	NM_005063	4	chr10:102112253-102114183|chr10:102114389-102116288
chr10:102683731-102685776	6	17	14	21	19	18	chr10	102683731	102685776	+	2	998.71	0.1974	circRNA	FAM178A	uc001krs.3	5.6	chr10:102678198-102683731|chr10:102685776-102689073
chr10:102683731-102690835	1	5	6	6	3	3	chr10	102683731	102690835	+	5	998,71,123,168,103	0,1974,5342,5855,7001	circRNA	FAM178A	uc001krs.3	5,6,7,8,9	chr10:102678198-102683731|chr10:102690835-102697158
chr10:102697158-102703885	0	1	1	1	2	1	chr10	102697158	102703885	+	3	76,142,103	0,1193,6624	circRNA	FAM178A	uc001krs.3	10,11,12	chr10:102690835-102697158|chr10:102703885-102705086
chr10:102697158-102710510	0	0	3	1	2	0	chr10	102697158	102710510	+	8	76,142,103,177,98,88,132,78	0,1193,6624,7928,9637,10358,12674,13274	circRNA	FAM178A	uc001krs.3	10,11,12,13,14,15,16,17	chr10:102690835-102697158|chr10:102710510-102716207
chr10:102697158-102716294	0	0	0	2	0	0	chr10	102697158	102716294	+	9	76,142,103,177,98,88,132,78,87	0,1193,6624,7928,9637,10358,12674,13274,19049	circRNA	FAM178A	uc001krs.3	10,11,12,13,14,15,16,17,18	chr10:102690835-102697158|chr10:102716294-102719184
chr10:102703782-102710510	0	0	2	0	0	0	chr10	102703782	102710510	+	6	103,177,98,88,132,78	0,1304,3013,3734,6050,6650	circRNA	FAM178A	uc001krs.3	12,13,14,15,16,17	chr10:102698493-102703782|chr10:102710510-102716207
chr10:103384501-103436193	5	9	1	9	6	0	chr10	103384501	103436193	-	5	66,95,133,186,96	0,43141,48170,48743,51596	circRNA	FBXW4	NM_022039	6,5,4,3,2	chr10:103372234-103384501|chr10:103436193-103454137
chr10:103427642-103436193	16	19	30	55	51	37	chr10	103427642	103436193	-	4	95,133,186,96	0,5029,5602,8455	circRNA	FBXW4	NM_022039	5,4,3,2	chr10:103384567-103427642|chr10:103436193-103454137
chr10:103432671-103433430	0	0	1	4	2	0	chr10	103432671	103433430	-	2	133.186	0.573	circRNA	FBXW4	NM_022039	4.3	chr10:103427737-103432671|chr10:103433430-103436097
chr10:103432671-103436193	3	11	10	9	12	7	chr10	103432671	103436193	-	3	133,186,96	0,573,3426	circRNA	FBXW4	NM_022039	4,3,2	chr10:103427737-103432671|chr10:103436193-103454137
chr10:103552595-103560157	0	0	0	2	0	0	chr10	103552595	103560157	-	5	105,86,175,614,159	0,1074,5141,6003,7403	circRNA	MGEA5	NM_012215	12,11,10,9,8	chr10:103551196-103552595|chr10:103560157-103563491
chr10:103552595-103567658	1	3	1	4	3	2	chr10	103552595	103567658	-	7	105,86,175,614,285,99,172	0,1074,5141,6003,10896,13206,14891	circRNA	MGEA5	ENST00000439817	11,10,9,8,7,6,5	chr10:103551196-103552595|chr10:103567658-103569940
chr10:103552595-103570071	2	4	11	16	21	13	chr10	103552595	103570071	-	8	105,86,175,614,285,99,172,131	0,1074,5141,6003,10896,13206,14891,17345	circRNA	MGEA5	ENST00000439817	11,10,9,8,7,6,5,4	chr10:103551196-103552595|chr10:103570071-103572786
chr10:103552595-103573363	3	0	5	2	2	4	chr10	103552595	103573363	-	10	105,86,175,614,285,99,172,131,98,52	0,1074,5141,6003,10896,13206,14891,17345,20191,20716	circRNA	MGEA5	ENST00000439817	11,10,9,8,7,6,5,4,3,2	chr10:103551196-103552595|chr10:103573363-103577580
chr10:103557736-103560157	0	3	0	2	0	0	chr10	103557736	103560157	-	3	175,614,159	0,862,2262	circRNA	MGEA5	NM_012215	10,9,8	chr10:103553755-103557736|chr10:103560157-103563491
chr10:103557736-103567658	1	1	1	3	1	1	chr10	103557736	103567658	-	5	175,614,285,99,172	0,862,5755,8065,9750	circRNA	MGEA5	ENST00000439817	9,8,7,6,5	chr10:103553755-103557736|chr10:103567658-103569940
chr10:103557736-103570071	0	1	2	3	1	2	chr10	103557736	103570071	-	6	175,614,285,99,172,131	0,862,5755,8065,9750,12204	circRNA	MGEA5	ENST00000439817	9,8,7,6,5,4	chr10:103553755-103557736|chr10:103570071-103572786
chr10:103557736-103573363	0	2	1	2	3	0	chr10	103557736	103573363	-	8	175,614,285,99,172,131,98,52	0,862,5755,8065,9750,12204,15050,15575	circRNA	MGEA5	ENST00000439817	9,8,7,6,5,4,3,2	chr10:103553755-103557736|chr10:103573363-103577580
chr10:103558598-103560157	1	0	0	4	3	0	chr10	103558598	103560157	-	2	614.159	0.14	circRNA	MGEA5	NM_012215	9.8	chr10:103557911-103558598|chr10:103560157-103563491
chr10:103558598-103567658	0	0	0	0	3	0	chr10	103558598	103567658	-	4	614,285,99,172	0,4893,7203,8888	circRNA	MGEA5	ENST00000439817	8,7,6,5	chr10:103557911-103558598|chr10:103567658-103569940
chr10:103558598-103570071	0	3	2	1	2	1	chr10	103558598	103570071	-	5	614,285,99,172,131	0,4893,7203,8888,11342	circRNA	MGEA5	ENST00000439817	8,7,6,5,4	chr10:103557911-103558598|chr10:103570071-103572786
chr10:103558598-103573363	1	1	0	0	0	2	chr10	103558598	103573363	-	7	614,285,99,172,131,98,52	0,4893,7203,8888,11342,14188,14713	circRNA	MGEA5	ENST00000439817	8,7,6,5,4,3,2	chr10:103557911-103558598|chr10:103573363-103577580
chr10:103699619-103717489	2	2	2	8	1	5	chr10	103699619	103717489	-	3	76,127,83	0,16734,17787	circRNA	C10orf76	NM_024541	23,22,21	chr10:103649247-103699619|chr10:103717489-103734968
chr10:103734968-103755112	0	2	0	0	2	0	chr10	103734968	103755112	-	5	89,61,70,66,59	0,15339,16757,18326,20085	circRNA	C10orf76	NM_024541	20,19,18,17,16	chr10:103717489-103734968|chr10:103755112-103761727
chr10:103783233-103785005	0	0	3	4	4	3	chr10	103783233	103785005	-	3	87,75,93	0,198,1679	circRNA	C10orf76	NM_024541	8,7,6	chr10:103773781-103783233|chr10:103785005-103789394
chr10:103783233-103789502	2	1	0	0	6	4	chr10	103783233	103789502	-	4	87,75,93,108	0,198,1679,6161	circRNA	C10orf76	NM_024541	8,7,6,5	chr10:103773781-103783233|chr10:103789502-103792782
chr10:103783233-103793096	0	4	1	1	1	0	chr10	103783233	103793096	-	6	87,75,93,108,147,57	0,198,1679,6161,9549,9806	circRNA	C10orf76	NM_024541	8,7,6,5,4,3	chr10:103773781-103783233|chr10:103793096-103799769
chr10:103784912-103793096	0	1	0	2	1	1	chr10	103784912	103793096	-	4	93,108,147,57	0,4482,7870,8127	circRNA	C10orf76	NM_024541	6,5,4,3	chr10:103783506-103784912|chr10:103793096-103799769
chr10:103870285-103870901	0	0	2	0	0	0	chr10	103870285	103870901	-	3	173,103,76	0,340,540	circRNA	LDB1	NM_001113407	6,5,4	chr10:103869800-103870285|chr10:103870901-103871012
chr10:103916775-103917971	0	9	8	6	3	9	chr10	103916775	103917971	+	4	56,140,125,166	0,170,412,1030	circRNA	NOLC1	ENST00000605788	2,3,4,5	chr10:103912287-103916775|chr10:103917971-103918949
chr10:104135115-104136897	0	0	2	0	0	0	chr10	104135115	104136897	+	4	226,161,241,206	0,913,1201,1576	circRNA	GBF1	NM_004193	30,31,32,33	chr10:104130617-104135115|chr10:104136897-104139040
chr10:104414409-104416142	3	0	2	2	0	2	chr10	104414409	104416142	+	4	96,234,32,116	0,427,1453,1617	circRNA	TRIM8	NM_030912	2,3,4,5	chr10:104404944-104414409|chr10:104416142-104416503
chr10:104459129-104465246	2	1	1	0	0	0	chr10	104459129	104465246	-	2	117.144	0.5973	circRNA	ARL3	NM_004311	3.2	chr10:104449700-104459129|chr10:104465246-104474029
chr10:1046616-1051847	0	0	0	0	1	2	chr10	1046616	1051847	+	3	192,66,90	0,271,5141	circRNA	GTPBP4	ENST00000360803	7,8,9	chr10:1045035-1046616|chr10:1051847-1052957
chr10:104851320-104854212	0	1	2	1	3	1	chr10	104851320	104854212	-	4	52,171,67,108	0,1575,2408,2784	circRNA	NT5C2	ENST00000343289	15,14,13,12	chr10:104850753-104851320|chr10:104854212-104855695
chr10:104853728-104854212	0	0	2	0	0	0	chr10	104853728	104854212	-	2	67.108	0.376	circRNA	NT5C2	ENST00000343289	13.12	chr10:104853066-104853728|chr10:104854212-104855695
chr10:104899162-104941085	2	3	1	1	6	2	chr10	104899162	104941085	-	3	74,125,144	0,35452,41779	circRNA	NT5C2	NM_001351169	4,3,2	chr10:104866463-104899162|chr10:104941085-104952992
chr10:104934614-104941085	0	1	0	1	2	1	chr10	104934614	104941085	-	2	125.144	0.6327	circRNA	NT5C2	NM_001351169	3.2	chr10:104899236-104934614|chr10:104941085-104952992
chr10:105106994-105108756	3	10	1	4	3	2	chr10	105106994	105108756	-	4	60,56,97,100	0,157,1478,1662	circRNA	PCGF6	ENST00000369847	5,4,3,2	chr10:105104889-105106994|chr10:105108756-105110463
chr10:1051757-1053068	0	4	0	0	0	1	chr10	1051757	1053068	+	2	90.111	0.12	circRNA	GTPBP4	ENST00000360803	9.1	chr10:1046953-1051757|chr10:1053068-1054897
chr10:105197771-105198565	2	8	4	2	2	10	chr10	105197771	105198565	+	2	57.123	0.671	circRNA	PDCD11	ENST00000369797	26.27	chr10:105194732-105197771|chr10:105198565-105199502
chr10:105199502-105200607	8	8	7	3	8	9	chr10	105199502	105200607	+	3	123,292,117	0,544,988	circRNA	PDCD11	ENST00000369797	28,29,30	chr10:105198565-105199502|chr10:105200607-105201582
chr10:105371337-105386959	1	0	0	0	3	0	chr10	105371337	105386959	-	5	50,338,118,84,114	0,1272,5616,10889,15508	circRNA	SH3PXD2A	ENST00000427662	7,6,5,4,3	chr10:105348696-105371337|chr10:105386959-105420740
chr10:105750432-105752891	0	1	1	2	0	0	chr10	105750432	105752891	+	3	165,49,150	0,1923,2309	circRNA	SLK	NM_001304743	2,3,4	chr10:105727653-105750432|chr10:105752891-105758656
chr10:105767934-105778666	1	6	0	9	6	2	chr10	105767934	105778666	+	3	180,130,125	0,9983,10607	circRNA	SLK	NM_001304743	12,13,14	chr10:105765793-105767934|chr10:105778666-105779491
chr10:111651479-111674857	0	1	0	2	1	1	chr10	111651479	111674857	-	4	105,64,125,89	0,1290,15969,23289	circRNA	XPNPEP1	NM_001324136	5,4,3,2	chr10:111648353-111651479|chr10:111674857-111682637
chr10:1118055-1126416	1	2	4	0	0	5	chr10	1118055	1126416	+	4	178,97,96,65	0,5791,7895,8296	circRNA	WDR37	ENST00000358220	2,3,4,5	chr10:1095581-1118055|chr10:1126416-1130342
chr10:1118055-1142186	0	4	7	4	4	2	chr10	1118055	1142186	+	8	178,97,96,65,136,72,45,77	0,5791,7895,8296,12287,14170,21336,24054	circRNA	WDR37	ENST00000358220	2,3,4,5,6,7,8,9	chr10:1095581-1118055|chr10:1142186-1149541
chr10:1118055-1151207	0	0	3	0	1	0	chr10	1118055	1151207	+	10	178,97,96,65,136,72,45,77,235,142	0,5791,7895,8296,12287,14170,21336,24054,31486,33010	circRNA	WDR37	ENST00000358220	2,3,4,5,6,7,8,9,10,11	chr10:1095581-1118055|chr10:1151207-1170157
chr10:111860382-111860606	0	0	2	1	0	0	chr10	111860382	111860606	+	1	224	0	circRNA	ADD3	NM_001320591	3	chr10:111765909-111860382|chr10:111860606-111872534
chr10:111860382-111882050	0	1	0	0	2	0	chr10	111860382	111882050	+	8	224,139,152,81,150,144,99,183	0,12152,15634,16717,17962,18586,18841,21485	circRNA	ADD3	NM_001320591	3,4,5,6,7,8,9,10	chr10:111765909-111860382|chr10:111882050-111883774
chr10:111860382-111890244	0	1	0	0	2	1	chr10	111860382	111890244	+	12	224,139,152,81,150,144,99,183,258,120,87,124	0,12152,15634,16717,17962,18586,18841,21485,23392,25201,25792,29738	circRNA	ADD3	NM_001320591	3,4,5,6,7,8,9,10,11,12,13,14	chr10:111765909-111860382|chr10:111890244-111892062
chr10:111876016-111886261	0	0	0	0	2	0	chr10	111876016	111886261	+	9	152,81,150,144,99,183,258,120,87	0,1083,2328,2952,3207,5851,7758,9567,10158	circRNA	ADD3	NM_001320591	5,6,7,8,9,10,11,12,13	chr10:111872673-111876016|chr10:111886261-111890120
chr10:111883774-111890244	3	4	1	4	7	1	chr10	111883774	111890244	+	4	258,120,87,124	0,1809,2400,6346	circRNA	ADD3	NM_001320591	11,12,13,14	chr10:111882050-111883774|chr10:111890244-111892062
chr10:11207448-11299835	0	1	3	1	2	1	chr10	11207448	11299835	+	4	197,83,49,135	0,51939,83667,92252	circRNA	CELF2	NM_001326317	4,5,6,7	chr10:10961962-11207448|chr10:11299835-11308560
chr10:112262478-112266912	0	0	0	0	3	1	chr10	112262478	112266912	+	2	149.22	0.4214	circRNA	DUSP5	ENST00000369583	2.3	chr10:112258258-112262478|chr10:112266912-112269777
chr10:112349362-112352981	0	0	0	1	2	2	chr10	112349362	112352981	+	5	104,100,161,142,151	0,287,807,1386,3468	circRNA	SMC3	NM_005445	14,15,16,17,18	chr10:112344154-112349362|chr10:112352981-112356155
chr10:112356155-112358048	10	17	24	40	25	31	chr10	112356155	112358048	+	2	153.152	0.1741	circRNA	SMC3	NM_005445	19.2	chr10:112352981-112356155|chr10:112358048-112359411
chr10:11259387-11330515	0	1	3	0	0	0	chr10	11259387	11330515	+	7	83,49,135,80,159,64,135	0,31728,40313,49173,53241,57632,70993	circRNA	CELF2	NM_001326317	5,6,7,8,9,10,11	chr10:11207645-11259387|chr10:11330515-11356101
chr10:1125950-1126416	5	4	3	1	1	4	chr10	1125950	1126416	+	2	96.65	0.401	circRNA	WDR37	ENST00000358220	4.5	chr10:1123943-1125950|chr10:1126416-1130342
chr10:1125950-1132297	0	0	1	0	2	0	chr10	1125950	1132297	+	4	96,65,136,72	0,401,4392,6275	circRNA	WDR37	ENST00000358220	4,5,6,7	chr10:1123943-1125950|chr10:1132297-1139391
chr10:112640990-112642855	0	2	0	1	0	1	chr10	112640990	112642855	+	2	303.95	0.177	circRNA	PDCD4	NM_014456	3.4	chr10:112635828-112640990|chr10:112642855-112645010
chr10:112640990-112650428	2	1	2	2	0	0	chr10	112640990	112650428	+	6	303,95,114,222,98,115	0,1770,4020,6432,8300,9323	circRNA	PDCD4	NM_014456	3,4,5,6,7,8	chr10:112635828-112640990|chr10:112650428-112653848
chr10:112641032-112647644	0	0	2	0	0	0	chr10	112641032	112647644	+	4	261,95,114,222	0,1728,3978,6390	circRNA	PDCD4	NM_001199492	3,4,5,6	chr10:112635828-112641032|chr10:112647644-112649290
chr10:112645010-112650428	0	4	0	2	0	1	chr10	112645010	112650428	+	4	114,222,98,115	0,2412,4280,5303	circRNA	PDCD4	NM_001199492	5,6,7,8	chr10:112642855-112645010|chr10:112650428-112653848
chr10:112711365-112724819	0	1	0	3	5	1	chr10	112711365	112724819	+	2	185.937	0.12517	circRNA	SHOC2	NM_001324337	2.3	chr10:112679415-112711365|chr10:112724819-112745385
chr10:112711365-112745523	0	0	0	0	1	5	chr10	112711365	112745523	+	3	185,937,138	0,12517,34020	circRNA	SHOC2	NM_001324337	2,3,4	chr10:112679415-112711365|chr10:112745523-112760172
chr10:112723882-112724819	2	0	1	2	1	1	chr10	112723882	112724819	+	1	937	0	circRNA	SHOC2	NM_001324336	2	chr10:112679199-112723882|chr10:112724819-112745385
chr10:112723882-112745523	4	20	23	33	26	15	chr10	112723882	112745523	+	2	937.138	0.21503	circRNA	SHOC2	NM_001324336	2.3	chr10:112679199-112723882|chr10:112745523-112760172
chr10:11291115-11312787	0	0	1	1	1	3	chr10	11291115	11312787	+	4	49,135,80,159	0,8585,17445,21513	circRNA	CELF2	NM_001326317	6,7,8,9	chr10:11259470-11291115|chr10:11312787-11317019
chr10:11291115-11317083	0	1	2	0	1	6	chr10	11291115	11317083	+	5	49,135,80,159,64	0,8585,17445,21513,25904	circRNA	CELF2	NM_001326317	6,7,8,9,10	chr10:11259470-11291115|chr10:11317083-11330380
chr10:11291115-11330515	0	3	3	5	6	8	chr10	11291115	11330515	+	6	49,135,80,159,64,135	0,8585,17445,21513,25904,39265	circRNA	CELF2	NM_001326317	6,7,8,9,10,11	chr10:11259470-11291115|chr10:11330515-11356101
chr10:1130342-1142186	2	5	7	8	11	9	chr10	1130342	1142186	+	4	136,72,45,77	0,1883,9049,11767	circRNA	WDR37	ENST00000358220	6,7,8,9	chr10:1126416-1130342|chr10:1142186-1149541
chr10:1130342-1151207	0	4	4	2	6	4	chr10	1130342	1151207	+	6	136,72,45,77,235,142	0,1883,9049,11767,19199,20723	circRNA	WDR37	ENST00000358220	6,7,8,9,10,11	chr10:1126416-1130342|chr10:1151207-1170157
chr10:11312628-11330515	0	0	1	0	2	1	chr10	11312628	11330515	+	3	159,64,135	0,4391,17752	circRNA	CELF2	NM_001326317	9,10,11	chr10:11308640-11312628|chr10:11330515-11356101
chr10:11363169-11371060	0	1	0	0	2	2	chr10	11363169	11371060	+	3	180,144,172	0,4629,7719	circRNA	CELF2	NM_001326325	13,14,15	chr10:11356221-11363169|chr10:11371060-11372418
chr10:114286845-114298089	2	3	1	2	2	1	chr10	114286845	114298089	+	3	78,21,85	0,6443,11159	circRNA	VTI1A	NM_001318203	4,5,6	chr10:114224416-114286845|chr10:114298089-114427976
chr10:1149538-1151207	1	2	2	3	2	1	chr10	1149538	1151207	+	2	238.142	0.1527	circRNA	WDR37	uc009xhm.1	10.11	chr10:1142186-1149538|chr10:1151207-1170157
chr10:1149541-1151207	0	1	2	2	0	0	chr10	1149541	1151207	+	2	235.142	0.1524	circRNA	WDR37	ENST00000358220	10.11	chr10:1142186-1149541|chr10:1151207-1170157
chr10:11523768-11527910	2	1	0	3	0	3	chr10	11523768	11527910	-	4	153,100,66,95	0,3201,3399,4047	circRNA	USP6NL	ENST00000609104	14,13,12,11	chr10:11505848-11523768|chr10:11527910-11531100
chr10:11551593-11569566	0	0	2	2	2	1	chr10	11551593	11569566	-	4	81,40,83,68	0,8940,15791,17905	circRNA	USP6NL	ENST00000609104	6,5,4,3	chr10:11543207-11551593|chr10:11569566-11639629
chr10:115636279-115644139	1	7	5	12	12	11	chr10	115636279	115644139	+	3	456,122,130	0,3053,7730	circRNA	NHLRC2	NM_198514	3,4,5	chr10:115618439-115636279|chr10:115644139-115657868
chr10:115636279-115657968	0	0	0	2	0	0	chr10	115636279	115657968	+	4	456,122,130,100	0,3053,7730,21589	circRNA	NHLRC2	NM_198514	3,4,5,6	chr10:115618439-115636279|chr10:115657968-115661424
chr10:115636279-115664795	0	0	0	0	2	1	chr10	115636279	115664795	+	8	456,122,130,100,232,123,210,220	0,3053,7730,21589,25145,25950,27006,28296	circRNA	NHLRC2	NM_198514	3,4,5,6,7,8,9,10	chr10:115618439-115636279|chr10:115664795-115668038
chr10:115639332-115657968	0	1	0	0	2	0	chr10	115639332	115657968	+	3	122,130,100	0,4677,18536	circRNA	NHLRC2	NM_198514	4,5,6	chr10:115636735-115639332|chr10:115657968-115661424
chr10:115639332-115664795	0	0	0	0	2	0	chr10	115639332	115664795	+	7	122,130,100,232,123,210,220	0,4677,18536,22092,22897,23953,25243	circRNA	NHLRC2	NM_198514	4,5,6,7,8,9,10	chr10:115636735-115639332|chr10:115664795-115668038
chr10:116590610-116608496	0	1	0	4	1	0	chr10	116590610	116608496	+	12	79,170,105,123,294,197,115,77,193,170,144,91	0,2381,4685,5272,12081,12889,14515,15161,15323,15707,16238,17795	circRNA	FAM160B1	ENST00000369248	2,3,4,5,6,7,8,9,10,11,12,13	chr10:116581882-116590610|chr10:116608496-116614955
chr10:116603499-116608496	0	2	3	6	3	3	chr10	116603499	116608496	+	7	197,115,77,193,170,144,91	0,1626,2272,2434,2818,3349,4906	circRNA	FAM160B1	ENST00000369248	7,8,9,10,11,12,13	chr10:116602985-116603499|chr10:116608496-116614955
chr10:116719484-116734144	0	1	0	0	3	0	chr10	116719484	116734144	+	4	82,73,140,57	0,10642,12409,14603	circRNA	TRUB1	uc010qsl.2	4,5,6,7	chr10:116710908-116719484|chr10:116734144-116734881
chr10:116730126-116734144	0	2	1	5	2	1	chr10	116730126	116734144	+	3	73,140,57	0,1767,3961	circRNA	TRUB1	uc010qsl.2	5,6,7	chr10:116719566-116730126|chr10:116734144-116734881
chr10:11789347-11797607	1	3	0	1	1	0	chr10	11789347	11797607	+	3	122,98,201	0,2146,8059	circRNA	ECHDC3	NM_024693	2,3,4	chr10:11784745-11789347|chr10:11797607-11805222
chr10:11893995-11894214	3	3	5	10	23	9	chr10	11893995	11894214	+	1	219	0	circRNA	PROSER2	ENST00000474155	2	chr10:11865469-11893995|chr10:11894214-11904910
chr10:119078382-119100613	1	3	2	1	2	1	chr10	119078382	119100613	-	2	103.123	0.22108	circRNA	PDZD8	ENST00000334464	3.2	chr10:119049859-119078382|chr10:119100613-119133866
chr10:11971863-11994248	7	3	1	1	10	2	chr10	11971863	11994248	-	7	121,142,168,99,105,140,184	0,1776,6680,12800,13199,18504,22201	circRNA	UPF2	ENST00000356352	20,19,18,17,16,15,14	chr10:11963306-11971863|chr10:11994248-11997230
chr10:11973639-11990507	0	0	0	0	2	0	chr10	11973639	11990507	-	5	142,168,99,105,140	0,4904,11024,11423,16728	circRNA	UPF2	ENST00000356352	19,18,17,16,15	chr10:11971984-11973639|chr10:11990507-11994064
chr10:11978543-11994248	1	3	0	1	2	1	chr10	11978543	11994248	-	5	168,99,105,140,184	0,6120,6519,11824,15521	circRNA	UPF2	ENST00000356352	18,17,16,15,14	chr10:11973781-11978543|chr10:11994248-11997230
chr10:11984663-11994248	0	0	1	0	0	2	chr10	11984663	11994248	-	4	99,105,140,184	0,399,5704,9401	circRNA	UPF2	ENST00000356352	17,16,15,14	chr10:11978711-11984663|chr10:11994248-11997230
chr10:11990367-11994248	1	1	1	4	2	1	chr10	11990367	11994248	-	2	140.184	0.3697	circRNA	UPF2	ENST00000356352	15.14	chr10:11985167-11990367|chr10:11994248-11997230
chr10:11994064-12021164	0	0	0	2	0	0	chr10	11994064	12021164	-	7	184,276,204,186,117,114,109	0,3166,4254,7105,11943,15275,26991	circRNA	UPF2	ENST00000356352	14,13,12,11,10,9,8	chr10:11990507-11994064|chr10:12021164-12039670
chr10:12009339-12056183	0	0	1	4	2	2	chr10	12009339	12056183	-	7	114,109,86,104,150,198,161	0,11716,30331,32565,34335,37189,46683	circRNA	UPF2	ENST00000356352	9,8,7,6,5,4,3	chr10:12006124-12009339|chr10:12056183-12070743
chr10:12021055-12056183	0	4	4	8	11	2	chr10	12021055	12056183	-	6	109,86,104,150,198,161	0,18615,20849,22619,25473,34967	circRNA	UPF2	ENST00000356352	8,7,6,5,4,3	chr10:12009453-12021055|chr10:12056183-12070743
chr10:12039670-12046726	3	3	3	3	3	6	chr10	12039670	12046726	-	4	86,104,150,198	0,2234,4004,6858	circRNA	UPF2	ENST00000356352	7,6,5,4	chr10:12021164-12039670|chr10:12046726-12056022
chr10:12039670-12056183	8	20	17	30	35	26	chr10	12039670	12056183	-	5	86,104,150,198,161	0,2234,4004,6858,16352	circRNA	UPF2	ENST00000356352	7,6,5,4,3	chr10:12021164-12039670|chr10:12056183-12070743
chr10:120445494-120489922	1	0	1	2	2	2	chr10	120445494	120489922	-	8	186,44,139,90,103,96,103,127	0,615,5282,9158,15323,21509,43312,44301	circRNA	CACUL1	uc010qst.1	9,8,7,6,5,4,3,2	chr10:120433972-120445494|chr10:120489922-120513907
chr10:120450776-120454742	0	0	0	0	0	2	chr10	120450776	120454742	-	2	139.9	0.3876	circRNA	CACUL1	uc010qst.1	7.6	chr10:120446153-120450776|chr10:120454742-120460817
chr10:120488806-120489922	1	1	5	2	1	3	chr10	120488806	120489922	-	2	103.127	0.989	circRNA	CACUL1	uc010qst.1	3.2	chr10:120467099-120488806|chr10:120489922-120513907
chr10:12070743-12071523	0	1	1	0	4	2	chr10	12070743	12071523	-	1	780	0	circRNA	UPF2	ENST00000356352	2	chr10:12056183-12070743|chr10:12071523-12077057
chr10:120801505-120803654	0	4	0	1	2	1	chr10	120801505	120803654	-	2	779.89	0.206	circRNA	EIF3A	ENST00000369144	19.18	chr10:120797951-120801505|chr10:120803654-120809312
chr10:120810710-120818909	1	0	0	0	2	1	chr10	120810710	120818909	-	5	123,114,105,348,186	0,5541,5737,6757,8013	circRNA	EIF3A	ENST00000369144	15,14,13,12,11	chr10:120810186-120810710|chr10:120818909-120819113
chr10:120824910-120833449	2	0	0	1	1	2	chr10	120824910	120833449	-	6	172,209,200,164,137,191	0,4047,5487,7491,8042,8348	circRNA	EIF3A	ENST00000369144	7,6,5,4,3,2	chr10:120820840-120824910|chr10:120833449-120840139
chr10:120832401-120833449	0	0	1	6	1	4	chr10	120832401	120833449	-	3	164,137,191	0,551,857	circRNA	EIF3A	ENST00000369144	4,3,2	chr10:120830597-120832401|chr10:120833449-120840139
chr10:120867479-120877179	0	2	0	0	1	0	chr10	120867479	120877179	+	3	197,80,149	0,3881,9551	circRNA	FAM45A	NM_207009	2,3,4	chr10:120863709-120867479|chr10:120877179-120879852
chr10:120931893-120934104	0	0	0	0	0	2	chr10	120931893	120934104	-	3	104,136,142	0,1355,2069	circRNA	PRDX3	NM_001302272	5,4,3	chr10:120928045-120931893|chr10:120934104-120936532
chr10:12123470-12126750	0	1	0	1	2	3	chr10	12123470	12126750	+	2	156.212	0.3068	circRNA	DHTKD1	NM_018706	2.3	chr10:12111186-12123470|chr10:12126750-12129533
chr10:12123470-12129728	0	1	0	2	0	0	chr10	12123470	12129728	+	3	156,212,195	0,3068,6063	circRNA	DHTKD1	NM_018706	2,3,4	chr10:12111186-12123470|chr10:12129728-12130984
chr10:12123470-12133683	1	8	3	4	5	6	chr10	12123470	12133683	+	5	156,212,195,270,172	0,3068,6063,7514,10041	circRNA	DHTKD1	NM_018706	2,3,4,5,6	chr10:12111186-12123470|chr10:12133683-12136071
chr10:12123470-12136270	1	6	8	3	14	9	chr10	12123470	12136270	+	6	156,212,195,270,172,199	0,3068,6063,7514,10041,12601	circRNA	DHTKD1	NM_018706	2,3,4,5,6,7	chr10:12111186-12123470|chr10:12136270-12139682
chr10:12123470-12139995	0	2	0	0	0	2	chr10	12123470	12139995	+	7	156,212,195,270,172,199,313	0,3068,6063,7514,10041,12601,16212	circRNA	DHTKD1	NM_018706	2,3,4,5,6,7,8	chr10:12111186-12123470|chr10:12139995-12142176
chr10:12123470-12143180	2	6	1	3	6	7	chr10	12123470	12143180	+	9	156,212,195,270,172,199,313,85,140	0,3068,6063,7514,10041,12601,16212,18706,19570	circRNA	DHTKD1	NM_018706	2,3,4,5,6,7,8,9,10	chr10:12111186-12123470|chr10:12143180-12148244
chr10:12123470-12155063	2	3	2	1	7	5	chr10	12123470	12155063	+	12	156,212,195,270,172,199,313,85,140,151,107,165	0,3068,6063,7514,10041,12601,16212,18706,19570,24774,26437,31428	circRNA	DHTKD1	NM_018706	2,3,4,5,6,7,8,9,10,11,12,13	chr10:12111186-12123470|chr10:12155063-12159671
chr10:12123470-12159754	0	2	1	0	3	1	chr10	12123470	12159754	+	13	156,212,195,270,172,199,313,85,140,151,107,165,83	0,3068,6063,7514,10041,12601,16212,18706,19570,24774,26437,31428,36201	circRNA	DHTKD1	NM_018706	2,3,4,5,6,7,8,9,10,11,12,13,14	chr10:12111186-12123470|chr10:12159754-12160747
chr10:12123470-12162266	2	7	11	12	13	7	chr10	12123470	12162266	+	15	156,212,195,270,172,199,313,85,140,151,107,165,83,170,86	0,3068,6063,7514,10041,12601,16212,18706,19570,24774,26437,31428,36201,37277,38710	circRNA	DHTKD1	NM_018706	2,3,4,5,6,7,8,9,10,11,12,13,14,15,16	chr10:12111186-12123470|chr10:12162266-12162785
chr10:121275020-121286936	5	9	23	24	27	27	chr10	121275020	121286936	-	3	144,87,119	0,10523,11797	circRNA	RGS10	NM_002925	4,3,2	chr10:121259771-121275020|chr10:121286936-121295975
chr10:121285543-121286936	2	1	1	6	7	2	chr10	121285543	121286936	-	2	87.119	0.1274	circRNA	RGS10	NM_002925	3.2	chr10:121275164-121285543|chr10:121286936-121295975
chr10:12133511-12142261	0	0	0	2	0	0	chr10	12133511	12142261	+	4	172,199,313,85	0,2560,6171,8665	circRNA	DHTKD1	NM_018706	6,7,8,9	chr10:12131254-12133511|chr10:12142261-12143040
chr10:121339446-121347760	0	2	2	0	1	1	chr10	121339446	121347760	-	5	76,88,55,150,97	0,1987,2234,2524,8217	circRNA	TIAL1	uc001leh.1	6,5,4,3,2	chr10:121338346-121339446|chr10:121347760-121352963
chr10:121341433-121353025	0	0	0	0	2	0	chr10	121341433	121353025	-	5	88,55,150,97,62	0,247,537,6230,11530	circRNA	TIAL1	NM_001323968	6,5,4,3,2	chr10:121339522-121341433|chr10:121353025-121355945
chr10:12136071-12162266	0	1	2	3	4	0	chr10	12136071	12162266	+	10	199,313,85,140,151,107,165,83,170,86	0,3611,6105,6969,12173,13836,18827,23600,24676,26109	circRNA	DHTKD1	NM_018706	7,8,9,10,11,12,13,14,15,16	chr10:12133683-12136071|chr10:12162266-12162785
chr10:12139682-12142261	0	0	0	0	0	2	chr10	12139682	12142261	+	2	313.85	0.2494	circRNA	DHTKD1	NM_018706	8.9	chr10:12136270-12139682|chr10:12142261-12143040
chr10:121595051-121602107	0	0	0	0	0	2	chr10	121595051	121602107	-	5	165,134,166,118,124	0,1356,2995,5303,6932	circRNA	MCMBP	NM_001256378	14,13,12,11,10	chr10:121591612-121595051|chr10:121602107-121602765
chr10:12159671-12162266	0	3	2	2	9	1	chr10	12159671	12162266	+	3	83,170,86	0,1076,2509	circRNA	DHTKD1	NM_018706	14,15,16	chr10:12155063-12159671|chr10:12162266-12162785
chr10:12160747-12162266	2	6	0	4	9	4	chr10	12160747	12162266	+	2	170.86	0.1433	circRNA	DHTKD1	NM_018706	15.16	chr10:12159754-12160747|chr10:12162266-12162785
chr10:121663595-121668642	0	4	2	0	1	0	chr10	121663595	121668642	+	2	194.9	0.4957	circRNA	SEC23IP	NM_007190	4.5	chr10:121662521-121663595|chr10:121668642-121671555
chr10:12257738-12280484	0	1	4	0	0	1	chr10	12257738	12280484	+	6	96,107,49,76,123,29	0,1621,15208,19308,21404,22717	circRNA	CDC123	NM_006023	5,6,7,8,9,10	chr10:12252321-12257738|chr10:12280484-12288147
chr10:122618154-122637971	0	0	2	0	0	0	chr10	122618154	122637971	+	10	154,174,187,166,115,196,104,177,85,107	0,1466,4092,6404,6987,7926,8423,12527,15196,19710	circRNA	WDR11	ENST00000263461	3,4,5,6,7,8,9,10,11,12	chr10:122612147-122618154|chr10:122637971-122640337
chr10:122640337-122649521	2	1	0	5	7	1	chr10	122640337	122649521	+	6	76,109,125,148,107,115	0,2954,4988,5863,8252,9069	circRNA	WDR11	uc010qte.2	6,7,8,9,10,11	chr10:122637971-122640337|chr10:122649521-122650227
chr10:12277046-12280484	0	1	3	0	0	0	chr10	12277046	12280484	+	3	76,123,29	0,2096,3409	circRNA	CDC123	NM_006023	8,9,10	chr10:12272995-12277046|chr10:12280484-12288147
chr10:123549683-123683844	1	1	2	1	3	4	chr10	123549683	123683844	-	10	121,100,182,33,129,230,246,104,63,64	0,46549,50913,79837,109697,112222,120737,123621,132180,134097	circRNA	ATE1	NM_001001976	11,10,9,8,7,6,5,4,3,2	chr10:123503373-123549683|chr10:123683844-123687358
chr10:123596232-123683844	0	0	0	2	0	1	chr10	123596232	123683844	-	9	100,182,33,129,230,246,104,63,64	0,4364,33288,63148,65673,74188,77072,85631,87548	circRNA	ATE1	NM_001001976	10,9,8,7,6,5,4,3,2	chr10:123549804-123596232|chr10:123683844-123687358
chr10:123658355-123673408	0	0	0	3	1	1	chr10	123658355	123673408	-	4	129,230,246,104	0,3550,12065,14949	circRNA	ATE1	NM_001288735	5,4,3,2	chr10:123629553-123658355|chr10:123673408-123687358
chr10:123658355-123683844	0	1	2	2	1	2	chr10	123658355	123683844	-	6	129,230,246,104,63,64	0,3550,12065,14949,23508,25425	circRNA	ATE1	NM_007041	7,6,5,4,3,2	chr10:123629553-123658355|chr10:123683844-123687358
chr10:123661905-123681926	0	0	0	2	1	2	chr10	123661905	123681926	-	4	230,246,104,63	0,8515,11399,19958	circRNA	ATE1	NM_001001976	6,5,4,3	chr10:123659509-123661905|chr10:123681926-123683780
chr10:123661905-123683844	1	0	0	3	1	5	chr10	123661905	123683844	-	5	230,246,104,63,64	0,8515,11399,19958,21875	circRNA	ATE1	NM_001001976	6,5,4,3,2	chr10:123659509-123661905|chr10:123683844-123687358
chr10:123670420-123673408	0	0	1	3	2	1	chr10	123670420	123673408	-	2	246.104	0.2884	circRNA	ATE1	NM_001001976	5.4	chr10:123662135-123670420|chr10:123673408-123681863
chr10:123670420-123683844	0	1	2	1	5	1	chr10	123670420	123683844	-	4	246,104,63,64	0,2884,11443,13360	circRNA	ATE1	NM_001001976	5,4,3,2	chr10:123662135-123670420|chr10:123683844-123687358
chr10:123673304-123683844	1	2	1	3	1	0	chr10	123673304	123683844	-	3	104,63,64	0,8559,10476	circRNA	ATE1	NM_001001976	4,3,2	chr10:123670666-123673304|chr10:123683844-123687358
chr10:124151818-124184475	0	0	2	0	0	0	chr10	124151818	124184475	+	10	70,161,57,46,98,126,144,69,65,64	0,878,5615,8040,14273,20617,23556,25597,31896,32593	circRNA	PLEKHA1	NM_001330178	2,3,4,5,6,7,8,9,10,11	chr10:124134322-124151818|chr10:124184475-124186457
chr10:124793871-124800895	0	0	0	1	2	0	chr10	124793871	124800895	+	3	160,207,171	0,6110,6853	circRNA	ACADSB	NM_001330174	2,3,4	chr10:124768587-124793871|chr10:124800895-124802561
chr10:126097110-126100769	0	1	1	0	2	0	chr10	126097110	126100769	-	3	96,225,228	0,199,3431	circRNA	OAT	NM_000274	4,3,2	chr10:126094132-126097110|chr10:126100769-126107441
chr10:126185529-126205840	0	3	0	0	1	0	chr10	126185529	126205840	+	3	64,93,92	0,1075,20219	circRNA	LHPP	NM_022126	4,5,6	chr10:126177144-126185529|chr10:126205840-126301832
chr10:126370175-126370948	7	26	27	33	33	29	chr10	126370175	126370948	-	1	773	0	circRNA	FAM53B	uc001lhu.1	8	chr10:126307362-126370175|chr10:126370948-126384726
chr10:126370175-126384781	2	0	2	10	5	4	chr10	126370175	126384781	-	2	773.55	0.14551	circRNA	FAM53B	uc001lhu.1	8.7	chr10:126307362-126370175|chr10:126384781-126395204
chr10:126370175-126395456	0	2	1	4	1	3	chr10	126370175	126395456	-	3	773,55,252	0,14551,25029	circRNA	FAM53B	uc001lhu.1	8,7,6	chr10:126307362-126370175|chr10:126395456-126448954
chr10:126384726-126395456	0	1	1	4	3	0	chr10	126384726	126395456	-	2	55.252	0.10478	circRNA	FAM53B	uc001lhu.1	7.6	chr10:126370948-126384726|chr10:126395456-126448954
chr10:126395204-126395456	0	6	3	7	3	9	chr10	126395204	126395456	-	1	252	0	circRNA	FAM53B	uc001lhu.1	6	chr10:126384781-126395204|chr10:126395456-126448954
chr10:126463243-126478907	0	1	1	1	2	3	chr10	126463243	126478907	-	3	108,115,66	0,14368,15598	circRNA	RP11-12J10.3	ENST00000494792	4,3,2	chr10:126454177-126463243|chr10:126478907-126480292
chr10:126631025-126631876	1	28	35	16	40	23	chr10	126631025	126631876	+	1	851	0	circRNA	ZRANB1	uc010qug.2	2	chr10:126629116-126631025|chr10:126631876-126655162
chr10:126631025-126655350	1	0	1	1	4	2	chr10	126631025	126655350	+	2	851.188	0.24137	circRNA	ZRANB1	uc010qug.2	2.3	chr10:126629116-126631025|chr10:126655350-126660533
chr10:126662213-126662967	0	0	0	2	0	0	chr10	126662213	126662967	+	2	72.199	0.555	circRNA	ZRANB1	uc010qug.2	5.6	chr10:126660687-126662213|chr10:126662967-126670277
chr10:126727565-126799662	0	3	3	3	3	2	chr10	126727565	126799662	-	2	159.104	0.71993	circRNA	CTBP2	uc009yak.3	3.2	chr10:126692061-126727565|chr10:126799662-126847203
chr10:126727565-126822181	0	1	2	1	3	2	chr10	126727565	126822181	-	2	159.101	0.94515	circRNA	CTBP2	NM_001321014	3.2	chr10:126692061-126727565|chr10:126822181-126847203
chr10:126776759-126799662	1	0	1	1	2	3	chr10	126776759	126799662	-	2	129.104	0.22799	circRNA	CTBP2	ENST00000530884	3.2	chr10:126727724-126776759|chr10:126799662-126849395
chr10:127495981-127505094	0	0	3	1	1	1	chr10	127495981	127505094	-	5	75,75,97,84,89	0,4801,7621,8764,9024	circRNA	UROS	NR_136677	6,5,4,3,2	chr10:127486714-127495981|chr10:127505094-127511597
chr10:128768965-128780237	0	0	2	1	0	1	chr10	128768965	128780237	+	3	84,41,56	0,7246,11216	circRNA	DOCK1	ENST00000280333	2,3,4	chr10:128594132-128768965|chr10:128780237-128785784
chr10:128768965-128788867	0	8	6	8	15	9	chr10	128768965	128788867	+	5	84,41,56,97,149	0,7246,11216,16819,19753	circRNA	DOCK1	ENST00000280333	2,3,4,5,6	chr10:128594132-128768965|chr10:128788867-128795011
chr10:128768965-128798571	8	11	15	28	22	21	chr10	128768965	128798571	+	9	84,41,56,97,149,136,158,82,136	0,7246,11216,16819,19753,26046,27390,28652,29470	circRNA	DOCK1	ENST00000280333	2,3,4,5,6,7,8,9,10	chr10:128594132-128768965|chr10:128798571-128806995
chr10:128768965-128807068	1	0	2	3	1	3	chr10	128768965	128807068	+	10	84,41,56,97,149,136,158,82,136,73	0,7246,11216,16819,19753,26046,27390,28652,29470,38030	circRNA	DOCK1	ENST00000280333	2,3,4,5,6,7,8,9,10,11	chr10:128594132-128768965|chr10:128807068-128810558
chr10:128768965-128817099	0	4	0	0	2	2	chr10	128768965	128817099	+	12	84,41,56,97,149,136,158,82,136,73,80,126	0,7246,11216,16819,19753,26046,27390,28652,29470,38030,41593,48008	circRNA	DOCK1	ENST00000280333	2,3,4,5,6,7,8,9,10,11,12,13	chr10:128594132-128768965|chr10:128817099-128821463
chr10:128768965-128821588	0	0	0	0	2	0	chr10	128768965	128821588	+	13	84,41,56,97,149,136,158,82,136,73,80,126,125	0,7246,11216,16819,19753,26046,27390,28652,29470,38030,41593,48008,52498	circRNA	DOCK1	ENST00000280333	2,3,4,5,6,7,8,9,10,11,12,13,14	chr10:128594132-128768965|chr10:128821588-128822948
chr10:128768965-128824688	0	1	0	2	1	0	chr10	128768965	128824688	+	15	84,41,56,97,149,136,158,82,136,73,80,126,125,99,73	0,7246,11216,16819,19753,26046,27390,28652,29470,38030,41593,48008,52498,53983,55650	circRNA	DOCK1	ENST00000280333	2,3,4,5,6,7,8,9,10,11,12,13,14,15,16	chr10:128594132-128768965|chr10:128824688-128829913
chr10:128768965-128836080	0	0	0	0	2	0	chr10	128768965	128836080	+	18	84,41,56,97,149,136,158,82,136,73,80,126,125,99,73,104,184,98	0,7246,11216,16819,19753,26046,27390,28652,29470,38030,41593,48008,52498,53983,55650,60948,61435,67017	circRNA	DOCK1	ENST00000280333	2,3,4,5,6,7,8,9,10,11,12,13,14,15,16,17,18,19	chr10:128594132-128768965|chr10:128836080-128840888
chr10:128768965-128860040	0	0	1	3	5	2	chr10	128768965	128860040	+	22	84,41,56,97,149,136,158,82,136,73,80,126,125,99,73,104,184,98,90,101,135,109	0,7246,11216,16819,19753,26046,27390,28652,29470,38030,41593,48008,52498,53983,55650,60948,61435,67017,71923,72362,81979,90966	circRNA	DOCK1	ENST00000280333	2,3,4,5,6,7,8,9,10,11,12,13,14,15,16,17,18,19,20,21,22,23	chr10:128594132-128768965|chr10:128860040-128904494
chr10:128768965-128926028	0	2	3	1	1	0	chr10	128768965	128926028	+	26	84,41,56,97,149,136,158,82,136,73,80,126,125,99,73,104,184,98,90,101,135,109,71,107,128,96	0,7246,11216,16819,19753,26046,27390,28652,29470,38030,41593,48008,52498,53983,55650,60948,61435,67017,71923,72362,81979,90966,135529,139546,154772,156967	circRNA	DOCK1	ENST00000280333	2,3,4,5,6,7,8,9,10,11,12,13,14,15,16,17,18,19,20,21,22,23,24,25,26,27	chr10:128594132-128768965|chr10:128926028-129046271
chr10:128795011-128797699	0	1	1	2	3	2	chr10	128795011	128797699	+	3	136,158,82	0,1344,2606	circRNA	DOCK1	ENST00000280333	7,8,9	chr10:128788867-128795011|chr10:128797699-128798435
chr10:128795011-128798571	0	1	1	3	0	1	chr10	128795011	128798571	+	4	136,158,82,136	0,1344,2606,3424	circRNA	DOCK1	ENST00000280333	7,8,9,10	chr10:128788867-128795011|chr10:128798571-128806995
chr10:128806995-128810638	0	2	0	6	5	1	chr10	128806995	128810638	+	2	73.8	0.3563	circRNA	DOCK1	ENST00000280333	11.12	chr10:128798571-128806995|chr10:128810638-128816973
chr10:128806995-128817099	0	0	2	1	3	2	chr10	128806995	128817099	+	3	73,80,126	0,3563,9978	circRNA	DOCK1	ENST00000280333	11,12,13	chr10:128798571-128806995|chr10:128817099-128821463
chr10:128806995-128824688	0	3	1	2	1	1	chr10	128806995	128824688	+	6	73,80,126,125,99,73	0,3563,9978,14468,15953,17620	circRNA	DOCK1	ENST00000280333	11,12,13,14,15,16	chr10:128798571-128806995|chr10:128824688-128829913
chr10:128829913-128836080	0	2	0	1	4	1	chr10	128829913	128836080	+	3	104,184,98	0,487,6069	circRNA	DOCK1	ENST00000280333	17,18,19	chr10:128824688-128829913|chr10:128836080-128840888
chr10:128835982-128841428	0	0	0	1	0	2	chr10	128835982	128841428	+	3	98,90,101	0,4906,5345	circRNA	DOCK1	ENST00000280333	19,20,21	chr10:128830584-128835982|chr10:128841428-128850944
chr10:128859931-128908618	0	0	1	2	1	1	chr10	128859931	128908618	+	3	109,71,107	0,44563,48580	circRNA	DOCK1	ENST00000280333	23,24,25	chr10:128851079-128859931|chr10:128908618-128923737
chr10:128859931-128926028	2	2	0	0	0	1	chr10	128859931	128926028	+	5	109,71,107,128,96	0,44563,48580,63806,66001	circRNA	DOCK1	ENST00000280333	23,24,25,26,27	chr10:128851079-128859931|chr10:128926028-129046271
chr10:128923737-128926028	2	0	2	0	0	0	chr10	128923737	128926028	+	2	128.96	0.2195	circRNA	DOCK1	ENST00000280333	26.27	chr10:128908618-128923737|chr10:128926028-129046271
chr10:128973475-128975403	0	0	0	0	3	0	chr10	128973475	128975403	-	2	1189.26	0.1665	circRNA	FAM196A	NM_001039762	4.3	chr10:128952187-128973475|chr10:128975403-128990868
chr10:131958258-131973353	0	1	0	0	2	0	chr10	131958258	131973353	+	8	75,202,173,62,58,53,40,93	0,801,6512,6924,9438,11589,14872,15002	circRNA	GLRX3	NM_006541	3,4,5,6,7,8,9,10	chr10:131943583-131958258|chr10:131973353-131977605
chr10:131964770-131969900	0	0	0	1	3	1	chr10	131964770	131969900	+	4	173,62,58,53	0,412,2926,5077	circRNA	GLRX3	NM_006541	5,6,7,8	chr10:131959261-131964770|chr10:131969900-131973130
chr10:131969847-131977684	0	1	5	1	0	1	chr10	131969847	131977684	+	4	53,40,93,79	0,3283,3413,7758	circRNA	GLRX3	NM_001199868	8,9,10,11	chr10:131967754-131969847|chr10:131977684-131978376
chr10:13214375-13214765	3	4	10	9	11	5	chr10	13214375	13214765	+	2	105.138	0.252	circRNA	MCM10	ENST00000378714	4.5	chr10:13213263-13214375|chr10:13214765-13217509
chr10:13214375-13217681	0	2	0	1	0	0	chr10	13214375	13217681	+	3	105,138,172	0,252,3134	circRNA	MCM10	ENST00000378714	4,5,6	chr10:13213263-13214375|chr10:13217681-13222441
chr10:13214375-13222607	0	2	0	0	1	0	chr10	13214375	13222607	+	4	105,138,172,166	0,252,3134,8066	circRNA	MCM10	ENST00000378714	4,5,6,7	chr10:13213263-13214375|chr10:13222607-13224932
chr10:13233298-13234568	0	0	3	3	1	4	chr10	13233298	13234568	+	3	101,111,118	0,956,1152	circRNA	MCM10	ENST00000378714	11,12,13	chr10:13231080-13233298|chr10:13234568-13237040
chr10:13322975-13337606	1	2	2	2	3	1	chr10	13322975	13337606	-	6	135,150,182,82,169,111	0,2714,7384,10855,13452,14520	circRNA	PHYH	NM_001037537	7,6,5,4,3,2	chr10:13320354-13322975|chr10:13337606-13341419
chr10:13333830-13337606	0	2	1	0	1	1	chr10	13333830	13337606	-	3	82,169,111	0,2597,3665	circRNA	PHYH	NM_001037537	4,3,2	chr10:13330541-13333830|chr10:13337606-13341419
chr10:133784141-133787447	0	5	1	9	6	1	chr10	133784141	133787447	-	4	150,107,85,151	0,226,2396,3155	circRNA	BNIP3	NM_004052	5,4,3,2	chr10:133782073-133784141|chr10:133787447-133795264
chr10:134218129-134219793	0	0	0	2	0	0	chr10	134218129	134219793	+	1	1664	0	circRNA	PWWP2B	ENST00000305233	2	chr10:134210855-134218129|chr10:134219793-134230564
chr10:134421418-134464009	1	2	0	7	1	2	chr10	134421418	134464009	+	3	42,101,88	0,37953,42503	circRNA	INPP5A	NM_005539	2,3,4	chr10:134351675-134421418|chr10:134464009-134503895
chr10:134421418-134511423	0	2	2	7	16	5	chr10	134421418	134511423	+	5	42,101,88,64,104	0,37953,42503,82477,89901	circRNA	INPP5A	NM_005539	2,3,4,5,6	chr10:134351675-134421418|chr10:134511423-134521816
chr10:134421418-134523960	2	3	0	10	8	5	chr10	134421418	134523960	+	7	42,101,88,64,104,53,120	0,37953,42503,82477,89901,100398,102422	circRNA	INPP5A	NM_005539	2,3,4,5,6,7,8	chr10:134351675-134421418|chr10:134523960-134540324
chr10:134421418-134563349	0	1	1	9	2	2	chr10	134421418	134563349	+	10	42,101,88,64,104,53,120,85,96,75	0,37953,42503,82477,89901,100398,102422,118906,141602,141856	circRNA	INPP5A	NM_005539	2,3,4,5,6,7,8,9,10,11	chr10:134351675-134421418|chr10:134563349-134579276
chr10:134459371-134464009	0	0	0	0	1	2	chr10	134459371	134464009	+	2	101.88	0.455	circRNA	INPP5A	NM_005539	3.4	chr10:134421460-134459371|chr10:134464009-134503895
chr10:134459371-134511423	0	1	0	3	2	4	chr10	134459371	134511423	+	4	101,88,64,104	0,4550,44524,51948	circRNA	INPP5A	NM_005539	3,4,5,6	chr10:134421460-134459371|chr10:134511423-134521816
chr10:134503895-134523960	0	1	1	12	6	3	chr10	134503895	134523960	+	4	64,104,53,120	0,7424,17921,19945	circRNA	INPP5A	NM_005539	5,6,7,8	chr10:134464009-134503895|chr10:134523960-134540324
chr10:134503895-134563349	0	0	1	1	3	0	chr10	134503895	134563349	+	7	64,104,53,120,85,96,75	0,7424,17921,19945,36429,59125,59379	circRNA	INPP5A	NM_005539	5,6,7,8,9,10,11	chr10:134464009-134503895|chr10:134563349-134579276
chr10:134540324-134563349	0	1	1	1	5	2	chr10	134540324	134563349	+	3	85,96,75	0,22696,22950	circRNA	INPP5A	NM_005539	9,10,11	chr10:134523960-134540324|chr10:134563349-134579276
chr10:135209216-135212730	0	2	0	0	0	0	chr10	135209216	135212730	+	4	65,105,81,57	0,450,2722,3457	circRNA	RP11-108K14.8	ENST00000468317	3,4,5,6	chr10:135204932-135209216|chr10:135212730-135213032
chr10:135209216-135216277	0	1	3	9	8	4	chr10	135209216	135216277	+	8	65,105,81,57,91,62,97,82	0,450,2722,3457,3816,5816,6436,6979	circRNA	RP11-108K14.8	ENST00000468317	3,4,5,6,7,8,9,10	chr10:135204932-135209216|chr10:135216277-135232983
chr10:135211938-135213157	2	0	0	1	0	1	chr10	135211938	135213157	+	3	81,57,125	0,735,1094	circRNA	MTG1	ENST00000495014	4,5,6	chr10:135209771-135211938|chr10:135213157-135215032
chr10:13705452-13717044	0	0	0	0	2	0	chr10	13705452	13717044	-	4	57,229,123,134	0,2644,6953,11458	circRNA	FRMD4A	NM_001318338	8,7,6,5	chr10:13702553-13705452|chr10:13717044-13735897
chr10:14890607-14897942	0	0	2	4	0	2	chr10	14890607	14897942	+	7	49,106,91,105,162,156,103	0,181,1112,2610,3761,5516,7232	circRNA	HSPA14	NM_016299	4,5,6,7,8,9,10	chr10:14882156-14890607|chr10:14897942-14909081
chr10:14938844-14939516	1	4	4	9	2	4	chr10	14938844	14939516	+	1	672	0	circRNA	SUV39H2	NM_001193424	3	chr10:14923644-14938844|chr10:14939516-14941537
chr10:14970014-14977563	0	1	1	1	3	1	chr10	14970014	14977563	-	5	137,102,141,73,102	0,4838,6364,6687,7447	circRNA	DCLRE1C	ENST00000378289	10,9,8,7,6	chr10:14968896-14970014|chr10:14977563-14978536
chr10:15317853-15326104	1	2	6	2	2	1	chr10	15317853	15326104	-	2	93.228	0.8023	circRNA	FAM171A1	ENST00000378116	3.2	chr10:15296878-15317853|chr10:15326104-15412954
chr10:15590453-15634303	0	3	7	0	1	4	chr10	15590453	15634303	-	6	114,129,159,106,81,80	0,9619,23756,27034,38129,43770	circRNA	ITGA8	ENST00000378076	27,26,25,24,23,22	chr10:15573150-15590453|chr10:15634303-15639205
chr10:15600072-15614368	0	0	0	0	3	0	chr10	15600072	15614368	-	2	129.159	0.14137	circRNA	ITGA8	ENST00000378076	26.25	chr10:15590567-15600072|chr10:15614368-15617487
chr10:15614209-15628663	0	2	1	0	0	0	chr10	15614209	15628663	-	3	159,106,81	0,3278,14373	circRNA	ITGA8	ENST00000378076	25,24,23	chr10:15600201-15614209|chr10:15628663-15634223
chr10:15614209-15634303	0	0	2	0	0	1	chr10	15614209	15634303	-	4	159,106,81,80	0,3278,14373,20014	circRNA	ITGA8	ENST00000378076	25,24,23,22	chr10:15600201-15614209|chr10:15634303-15639205
chr10:15617487-15634303	0	2	6	0	3	2	chr10	15617487	15634303	-	3	106,81,80	0,11095,16736	circRNA	ITGA8	ENST00000378076	24,23,22	chr10:15614368-15617487|chr10:15634303-15639205
chr10:15686028-15689050	0	1	0	0	3	0	chr10	15686028	15689050	-	2	192.206	0.2816	circRNA	ITGA8	ENST00000378076	13.12	chr10:15658558-15686028|chr10:15689050-15697352
chr10:15838098-15889942	1	1	1	1	0	3	chr10	15838098	15889942	-	9	73,81,71,80,74,115,174,61,80	0,20735,25556,37530,38443,41104,45326,47112,51764	circRNA	MINDY3	NM_001318330	10,9,8,7,6,5,4,3,2	chr10:15831318-15838098|chr10:15889942-15902204
chr10:15858833-15876615	1	0	2	0	1	1	chr10	15858833	15876615	-	4	81,71,80,74	0,4821,16795,17708	circRNA	MINDY3	NM_001318330	9,8,7,6	chr10:15838171-15858833|chr10:15876615-15879202
chr10:15858833-15880278	0	0	2	0	0	0	chr10	15858833	15880278	-	6	81,71,80,74,115,52	0,4821,16795,17708,20369,21393	circRNA	MINDY3	NM_024948	10,9,8,7,6,5	chr10:15838171-15858833|chr10:15880278-15883424
chr10:15858833-15885271	0	2	1	2	1	2	chr10	15858833	15885271	-	7	81,71,80,74,115,174,61	0,4821,16795,17708,20369,24591,26377	circRNA	MINDY3	NM_001318330	9,8,7,6,5,4,3	chr10:15838171-15858833|chr10:15885271-15889862
chr10:15858833-15889942	1	8	8	34	22	13	chr10	15858833	15889942	-	8	81,71,80,74,115,174,61,80	0,4821,16795,17708,20369,24591,26377,31029	circRNA	MINDY3	NM_001318330	9,8,7,6,5,4,3,2	chr10:15838171-15858833|chr10:15889942-15902204
chr10:15863654-15885271	0	2	6	3	9	3	chr10	15863654	15885271	-	6	71,80,74,115,174,61	0,11974,12887,15548,19770,21556	circRNA	MINDY3	NM_001318330	8,7,6,5,4,3	chr10:15858914-15863654|chr10:15885271-15889862
chr10:15863654-15889942	0	2	5	7	8	9	chr10	15863654	15889942	-	7	71,80,74,115,174,61,80	0,11974,12887,15548,19770,21556,26208	circRNA	MINDY3	NM_001318330	8,7,6,5,4,3,2	chr10:15858914-15863654|chr10:15889942-15902204
chr10:15875628-15885271	0	2	3	4	4	5	chr10	15875628	15885271	-	5	80,74,115,174,61	0,913,3574,7796,9582	circRNA	MINDY3	NM_001318330	7,6,5,4,3	chr10:15863725-15875628|chr10:15885271-15889862
chr10:15875628-15889942	5	19	15	20	25	14	chr10	15875628	15889942	-	6	80,74,115,174,61,80	0,913,3574,7796,9582,14234	circRNA	MINDY3	NM_001318330	7,6,5,4,3,2	chr10:15863725-15875628|chr10:15889942-15902204
chr10:16526335-16528616	0	5	4	8	4	2	chr10	16526335	16528616	+	2	480.266	0.2015	circRNA	PTER	ENST00000535784	2.3	chr10:16479046-16526335|chr10:16528616-16547018
chr10:16794537-16796988	0	0	3	1	5	6	chr10	16794537	16796988	-	3	115,83,119	0,379,2332	circRNA	RSU1	ENST00000377921	6,5,4	chr10:16737154-16794537|chr10:16796988-16806388
chr10:16794537-16806509	0	2	4	3	3	2	chr10	16794537	16806509	-	4	115,83,119,121	0,379,2332,11851	circRNA	RSU1	ENST00000377921	6,5,4,3	chr10:16737154-16794537|chr10:16806509-16824032
chr10:16794537-16824083	1	3	8	9	17	29	chr10	16794537	16824083	-	5	115,83,119,121,51	0,379,2332,11851,29495	circRNA	RSU1	ENST00000377921	6,5,4,3,2	chr10:16737154-16794537|chr10:16824083-16858971
chr10:17199439-17210916	0	1	2	1	1	1	chr10	17199439	17210916	-	6	344,84,70,66,72,77	0,1705,2864,4042,4725,11400	circRNA	TRDMT1	NM_001321007	9,8,7,6,5,4	chr10:17196733-17199439|chr10:17210916-17211308
chr10:17365063-17373551	1	0	4	1	2	1	chr10	17365063	17373551	-	3	93,113,145	0,3949,8343	circRNA	ST8SIA6	NM_001004470	7,6,5	chr10:17363345-17365063|chr10:17373551-17401512
chr10:17401512-17421424	1	2	0	1	4	1	chr10	17401512	17421424	-	2	87.69	0.19843	circRNA	ST8SIA6	NM_001345961	5.4	chr10:17373551-17401512|chr10:17421424-17432529
chr10:17401512-17432619	7	24	22	36	31	18	chr10	17401512	17432619	-	2	87.9	0.31017	circRNA	ST8SIA6	NM_001004470	4.3	chr10:17373551-17401512|chr10:17432619-17495557
chr10:17401512-17495656	0	0	0	0	0	2	chr10	17401512	17495656	-	3	87,90,99	0,31017,94045	circRNA	ST8SIA6	NM_001004470	4,3,2	chr10:17373551-17401512|chr10:17495656-17496153
chr10:17645558-17646046	1	4	4	4	4	4	chr10	17645558	17646046	-	3	89,19,118	0,166,370	circRNA	HACD1	NM_014241	4,3,2	chr10:17641410-17645558|chr10:17646046-17659081
chr10:17746429-17747740	1	7	8	17	13	13	chr10	17746429	17747740	+	3	88,55,154	0,539,1157	circRNA	STAM	ENST00000377524	10,11,12	chr10:17742278-17746429|chr10:17747740-17750774
chr10:18874877-18905222	0	2	1	2	2	1	chr10	18874877	18905222	-	5	145,120,82,154,110	0,10259,23896,28511,30235	circRNA	NSUN6	uc010qcp.1	8,7,6,5,4	chr10:18840900-18874877|chr10:18905222-18931404
chr10:18898773-18905222	0	2	1	4	2	1	chr10	18898773	18905222	-	3	82,154,110	0,4615,6339	circRNA	NSUN6	uc010qcp.1	6,5,4	chr10:18885256-18898773|chr10:18905222-18931404
chr10:20290703-20335944	0	0	0	4	0	0	chr10	20290703	20335944	+	2	212.147	0.45094	circRNA	PLXDC2	ENST00000377252	2.3	chr10:20106120-20290703|chr10:20335944-20357098
chr10:20290703-20357168	0	0	3	2	6	3	chr10	20290703	20357168	+	2	212.7	0.66395	circRNA	PLXDC2	ENST00000377242	2.3	chr10:20106120-20290703|chr10:20357168-20432223
chr10:20290703-20508031	0	0	0	0	2	0	chr10	20290703	20508031	+	10	212,70,123,119,100,96,82,61,151,39	0,66395,141520,146009,162693,175224,175553,209894,215651,217289	circRNA	PLXDC2	ENST00000377242	2,3,4,5,6,7,8,9,10,11	chr10:20106120-20290703|chr10:20508031-20534273
chr10:20290703-20534434	0	0	0	0	2	4	chr10	20290703	20534434	+	11	212,70,123,119,100,96,82,61,151,39,161	0,66395,141520,146009,162693,175224,175553,209894,215651,217289,243570	circRNA	PLXDC2	ENST00000377242	2,3,4,5,6,7,8,9,10,11,12	chr10:20106120-20290703|chr10:20534434-20568631
chr10:20432223-20453496	0	6	2	6	19	3	chr10	20432223	20453496	+	3	123,119,100	0,4489,21173	circRNA	PLXDC2	ENST00000377242	4,5,6	chr10:20357168-20432223|chr10:20453496-20465927
chr10:20432223-20466338	0	1	3	1	5	1	chr10	20432223	20466338	+	5	123,119,100,96,82	0,4489,21173,33704,34033	circRNA	PLXDC2	ENST00000377242	4,5,6,7,8	chr10:20357168-20432223|chr10:20466338-20500597
chr10:20432223-20508031	0	0	0	3	4	0	chr10	20432223	20508031	+	8	123,119,100,96,82,61,151,39	0,4489,21173,33704,34033,68374,74131,75769	circRNA	PLXDC2	ENST00000377242	4,5,6,7,8,9,10,11	chr10:20357168-20432223|chr10:20508031-20534273
chr10:20436712-20466338	0	0	0	0	0	3	chr10	20436712	20466338	+	4	119,100,96,82	0,16684,29215,29544	circRNA	PLXDC2	ENST00000377242	5,6,7,8	chr10:20432346-20436712|chr10:20466338-20500597
chr10:20465927-20466338	0	0	0	0	3	0	chr10	20465927	20466338	+	2	96.82	0.329	circRNA	PLXDC2	ENST00000377242	7.8	chr10:20453496-20465927|chr10:20466338-20500597
chr10:20465927-20508031	0	0	4	6	2	0	chr10	20465927	20508031	+	5	96,82,61,151,39	0,329,34670,40427,42065	circRNA	PLXDC2	ENST00000377242	7,8,9,10,11	chr10:20453496-20465927|chr10:20508031-20534273
chr10:20500597-20508031	1	2	6	1	2	3	chr10	20500597	20508031	+	3	61,151,39	0,5757,7395	circRNA	PLXDC2	ENST00000377242	9,10,11	chr10:20466338-20500597|chr10:20508031-20534273
chr10:20500597-20534434	0	0	0	2	0	2	chr10	20500597	20534434	+	4	61,151,39,161	0,5757,7395,33676	circRNA	PLXDC2	ENST00000377242	9,10,11,12	chr10:20466338-20500597|chr10:20534434-20568631
chr10:21875222-21906136	0	0	2	0	1	1	chr10	21875222	21906136	+	5	55,110,104,94,96	0,9037,26054,28537,30818	circRNA	MLLT10	NM_001324297	5,6,7,8,9	chr10:21846753-21875222|chr10:21906136-21940601
chr10:21903759-21940697	0	1	0	2	1	1	chr10	21903759	21940697	+	3	94,96,96	0,2281,36842	circRNA	MLLT10	NM_001324297	8,9,10	chr10:21901380-21903759|chr10:21940697-21957845
chr10:21957845-21971186	0	0	0	0	0	2	chr10	21957845	21971186	+	5	136,256,570,45,33	0,1532,4433,12415,13308	circRNA	MLLT10	NM_001324297	11,12,13,14,15	chr10:21940697-21957845|chr10:21971186-22002700
chr10:21970260-22002879	0	2	2	2	2	1	chr10	21970260	22002879	+	3	45,33,179	0,893,32440	circRNA	MLLT10	NM_001324297	14,15,16	chr10:21962848-21970260|chr10:22002879-22015172
chr10:22002700-22016857	2	1	1	10	4	5	chr10	22002700	22016857	+	3	179,112,73	0,12472,14084	circRNA	MLLT10	NM_001324297	16,17,18	chr10:21971186-22002700|chr10:22016857-22019828
chr10:22171210-22209892	0	4	3	4	7	4	chr10	22171210	22209892	-	5	158,91,94,98,166	0,22240,36497,37550,38516	circRNA	DNAJC1	ENST00000376980	8,7,6,5,4	chr10:22095028-22171210|chr10:22209892-22217434
chr10:22193450-22209892	1	1	2	0	4	2	chr10	22193450	22209892	-	4	91,94,98,166	0,14257,15310,16276	circRNA	DNAJC1	ENST00000376980	7,6,5,4	chr10:22171368-22193450|chr10:22209892-22217434
chr10:22193450-22218070	0	0	2	4	0	2	chr10	22193450	22218070	-	6	91,94,98,166,47,102	0,14257,15310,16276,23984,24518	circRNA	DNAJC1	ENST00000376980	7,6,5,4,3,2	chr10:22171368-22193450|chr10:22218070-22292141
chr10:22207707-22209892	0	0	0	0	2	1	chr10	22207707	22209892	-	3	94,98,166	0,1053,2019	circRNA	DNAJC1	ENST00000376980	6,5,4	chr10:22193541-22207707|chr10:22209892-22217434
chr10:225933-255988	0	2	3	0	0	1	chr10	225933	255988	+	2	135.16	0.29895	circRNA	ZMYND11	ENST00000439456	2.3	chr10:180726-225933|chr10:255988-282777
chr10:225933-267296	1	3	11	8	11	8	chr10	225933	267296	+	3	135,160,162	0,29895,41201	circRNA	ZMYND11	NM_006624	2,3,4	chr10:180726-225933|chr10:267296-282777
chr10:225933-295028	0	1	2	3	5	4	chr10	225933	295028	+	13	135,160,162,78,93,88,56,78,119,208,69,273,186	0,29895,41201,56844,57591,59444,60062,60899,62027,66772,67404,68342,68909	circRNA	ZMYND11	NM_006624	2,3,4,5,6,7,8,9,10,11,12,13,14	chr10:180726-225933|chr10:295028-298287
chr10:22839587-22862386	0	0	0	1	3	0	chr10	22839587	22862386	-	4	114,39,42,147	0,17192,18354,22652	circRNA	PIP4K2A	uc010qcu.2	5,4,3,2	chr10:22830976-22839587|chr10:22862386-22880557
chr10:22856779-22880710	0	0	3	1	2	1	chr10	22856779	22880710	-	3	39,147,153	0,5460,23778	circRNA	PIP4K2A	NM_001330062	6,5,4	chr10:22839701-22856779|chr10:22880710-22896855
chr10:22880557-22898646	0	2	2	10	12	5	chr10	22880557	22898646	-	3	153,97,98	0,16298,17991	circRNA	PIP4K2A	NM_001330062	4,3,2	chr10:22862386-22880557|chr10:22898646-23002864
chr10:22896855-22898646	0	3	3	4	14	2	chr10	22896855	22898646	-	2	97.98	0.1693	circRNA	PIP4K2A	NM_001330062	3.2	chr10:22880710-22896855|chr10:22898646-23002864
chr10:24908401-24924032	1	2	0	2	6	4	chr10	24908401	24924032	-	5	1897,30,55,79,93	0,3260,10523,13929,15538	circRNA	ARHGAP21	ENST00000396432	9,8,7,6,5	chr10:24896832-24908401|chr10:24924032-24955913
chr10:24918924-24924032	3	4	2	10	7	3	chr10	24918924	24924032	-	3	55,79,93	0,3406,5015	circRNA	ARHGAP21	ENST00000396432	7,6,5	chr10:24911691-24918924|chr10:24924032-24955913
chr10:25140316-25147338	0	0	1	3	3	0	chr10	25140316	25147338	-	4	77,47,83,18	0,3930,5525,7004	circRNA	PRTFDC1	ENST00000320152	8,7,6,5	chr10:25138820-25140316|chr10:25147338-25160926
chr10:25226112-25231365	0	1	0	4	3	1	chr10	25226112	25231365	-	2	184.107	0.5146	circRNA	PRTFDC1	ENST00000320152	3.2	chr10:25160992-25226112|chr10:25231365-25241456
chr10:26789747-26792203	0	2	1	1	1	0	chr10	26789747	26792203	+	2	293.78	0.2378	circRNA	APBB1IP	ENST00000376236	5.6	chr10:26785320-26789747|chr10:26792203-26800675
chr10:26789747-26802589	0	2	0	0	0	0	chr10	26789747	26802589	+	4	293,78,160,122	0,2378,10928,12720	circRNA	APBB1IP	ENST00000376236	5,6,7,8	chr10:26785320-26789747|chr10:26802589-26822367
chr10:26800675-26802589	0	3	0	1	0	0	chr10	26800675	26802589	+	2	160.122	0.1792	circRNA	APBB1IP	ENST00000376236	7.8	chr10:26792203-26800675|chr10:26802589-26822367
chr10:26994214-26998697	0	0	2	2	0	0	chr10	26994214	26998697	+	2	109.131	0.4352	circRNA	PDSS1	NM_001321978	4.5	chr10:26993670-26994214|chr10:26998697-27009146
chr10:27009063-27013052	0	0	0	0	0	2	chr10	27009063	27013052	+	3	225,112,110	0,3671,3879	circRNA	PDSS1	NM_001321979	6,7,8	chr10:26998697-27009063|chr10:27013052-27024168
chr10:27009146-27013056	0	0	0	0	0	2	chr10	27009146	27013056	+	3	142,112,114	0,3588,3796	circRNA	PDSS1	NM_001321978	6,7,8	chr10:26998697-27009146|chr10:27013056-27031425
chr10:27047990-27059274	0	0	0	3	1	1	chr10	27047990	27059274	-	4	174,101,141,101	0,6156,9790,11183	circRNA	ABI1	ENST00000376170	8,7,6,5	chr10:27040712-27047990|chr10:27059274-27060003
chr10:27053438-27054247	0	2	0	3	0	1	chr10	27053438	27054247	-	2	130.101	0.708	circRNA	ABI1	NR_145410	8.7	chr10:27048164-27053438|chr10:27054247-27057780
chr10:27054146-27059274	0	2	1	2	1	3	chr10	27054146	27059274	-	3	101,141,101	0,3634,5027	circRNA	ABI1	ENST00000376170	7,6,5	chr10:27048164-27054146|chr10:27059274-27060003
chr10:27054146-27060018	2	4	8	3	2	4	chr10	27054146	27060018	-	4	101,141,101,15	0,3634,5027,5857	circRNA	ABI1	ENST00000376170	7,6,5,4	chr10:27048164-27054146|chr10:27060018-27065993
chr10:27403449-27410377	0	0	1	2	5	1	chr10	27403449	27410377	-	7	87,74,127,152,156,113,63	0,1539,1698,3055,4773,5914,6865	circRNA	YME1L1	NM_001253866	17,16,15,14,13,12,11	chr10:27401049-27403449|chr10:27410377-27411769
chr10:27404988-27405274	0	0	3	0	1	2	chr10	27404988	27405274	-	2	74.127	0.159	circRNA	YME1L1	NM_001253866	16.15	chr10:27403536-27404988|chr10:27405274-27406504
chr10:27406504-27410377	0	0	0	1	2	1	chr10	27406504	27410377	-	4	152,156,113,63	0,1718,2859,3810	circRNA	YME1L1	NM_001253866	14,13,12,11	chr10:27405274-27406504|chr10:27410377-27411769
chr10:27420787-27425314	0	0	0	3	1	1	chr10	27420787	27425314	-	4	83,84,151,110	0,2180,2972,4417	circRNA	YME1L1	NM_001253866	7,6,5,4	chr10:27415715-27420787|chr10:27425314-27434356
chr10:27431315-27434519	0	2	4	2	0	2	chr10	27431315	27434519	-	2	99.163	0.3041	circRNA	YME1L1	NM_014263	4.3	chr10:27425314-27431315|chr10:27434519-27437834
chr10:27447477-27448687	1	1	0	1	2	1	chr10	27447477	27448687	+	2	138.14	0.107	circRNA	MASTL	ENST00000375946	2.3	chr10:27444541-27447477|chr10:27448687-27450022
chr10:27447477-27454468	0	0	0	4	3	0	chr10	27447477	27454468	+	5	138,140,89,107,151	0,1070,2545,6515,6840	circRNA	MASTL	ENST00000375946	2,3,4,5,6	chr10:27444541-27447477|chr10:27454468-27456030
chr10:27453992-27454468	0	4	5	6	9	4	chr10	27453992	27454468	+	2	107.151	0.325	circRNA	MASTL	ENST00000375946	5.6	chr10:27450111-27453992|chr10:27454468-27456030
chr10:27456030-27462188	0	1	2	0	0	0	chr10	27456030	27462188	+	3	173,1140,139	0,2842,6019	circRNA	MASTL	ENST00000375946	7,8,9	chr10:27454468-27456030|chr10:27462188-27469881
chr10:27456030-27470510	0	0	0	0	2	2	chr10	27456030	27470510	+	5	173,1140,139,114,102	0,2842,6019,13851,14378	circRNA	MASTL	ENST00000375946	7,8,9,10,11	chr10:27454468-27456030|chr10:27470510-27475307
chr10:27458872-27460012	1	3	7	7	1	2	chr10	27458872	27460012	+	1	1140	0	circRNA	MASTL	ENST00000375946	8	chr10:27456203-27458872|chr10:27460012-27462049
chr10:27458872-27462188	0	2	3	1	8	7	chr10	27458872	27462188	+	2	1140.14	0.3177	circRNA	MASTL	ENST00000375946	8.9	chr10:27456203-27458872|chr10:27462188-27469881
chr10:27458872-27470510	2	1	2	7	1	2	chr10	27458872	27470510	+	4	1140,139,114,102	0,3177,11009,11536	circRNA	MASTL	ENST00000375946	8,9,10,11	chr10:27456203-27458872|chr10:27470510-27475307
chr10:27462049-27470510	0	0	0	1	0	2	chr10	27462049	27470510	+	3	139,114,102	0,7832,8359	circRNA	MASTL	ENST00000375946	9,10,11	chr10:27460012-27462049|chr10:27470510-27475307
chr10:27493368-27500010	2	0	0	0	0	0	chr10	27493368	27500010	-	4	110,51,200,268	0,758,3806,6374	circRNA	ACBD5	NM_001352570	12,11,10,9	chr10:27473244-27493368|chr10:27500010-27504463
chr10:27499742-27504570	0	2	0	0	0	0	chr10	27499742	27504570	-	2	268.107	0.4721	circRNA	ACBD5	NM_001352570	9.8	chr10:27497374-27499742|chr10:27504570-27506908
chr10:27815756-27822923	0	0	2	0	0	0	chr10	27815756	27822923	+	5	62,87,73,119,67	0,4701,5679,6907,7100	circRNA	RAB18	NM_001256410	3,4,5,6,7	chr10:27798859-27815756|chr10:27822923-27826804
chr10:27821435-27822923	0	2	2	2	3	5	chr10	27821435	27822923	+	3	73,119,67	0,1228,1421	circRNA	RAB18	NM_001256410	5,6,7	chr10:27820544-27821435|chr10:27822923-27826804
chr10:28358700-28378770	1	3	0	4	7	1	chr10	28358700	28378770	-	2	81.171	0.19899	circRNA	MPP7	ENST00000337532	14.13	chr10:28348672-28358700|chr10:28378770-28408579
chr10:28358700-28527664	0	0	0	2	1	0	chr10	28358700	28527664	-	12	81,171,65,197,75,86,82,132,81,78,119,168	0,19899,49879,50422,50822,54259,55238,61788,77711,80210,132381,168796	circRNA	MPP7	ENST00000337532	14,13,12,11,10,9,8,7,6,5,4,3	chr10:28348672-28358700|chr10:28527664-28543702
chr10:28378599-28527664	0	0	0	2	2	0	chr10	28378599	28527664	-	11	171,65,197,75,86,82,132,81,78,119,168	0,29980,30523,30923,34360,35339,41889,57812,60311,112482,148897	circRNA	MPP7	ENST00000337532	13,12,11,10,9,8,7,6,5,4,3	chr10:28358781-28378599|chr10:28527664-28543702
chr10:28408579-28420620	2	0	0	10	12	2	chr10	28408579	28420620	-	6	65,197,75,86,82,132	0,543,943,4380,5359,11909	circRNA	MPP7	ENST00000337532	12,11,10,9,8,7	chr10:28378770-28408579|chr10:28420620-28436411
chr10:28408579-28438988	0	1	0	6	5	0	chr10	28408579	28438988	-	8	65,197,75,86,82,132,81,78	0,543,943,4380,5359,11909,27832,30331	circRNA	MPP7	ENST00000337532	12,11,10,9,8,7,6,5	chr10:28378770-28408579|chr10:28438988-28491081
chr10:28408579-28527664	0	0	0	7	3	1	chr10	28408579	28527664	-	10	65,197,75,86,82,132,81,78,119,168	0,543,943,4380,5359,11909,27832,30331,82502,118917	circRNA	MPP7	ENST00000337532	12,11,10,9,8,7,6,5,4,3	chr10:28378770-28408579|chr10:28527664-28543702
chr10:28420488-28438988	0	0	0	3	3	0	chr10	28420488	28438988	-	3	132,81,78	0,15923,18422	circRNA	MPP7	ENST00000337532	7,6,5	chr10:28414020-28420488|chr10:28438988-28491081
chr10:28420488-28527664	1	0	0	2	0	1	chr10	28420488	28527664	-	5	132,81,78,119,168	0,15923,18422,70593,107008	circRNA	MPP7	ENST00000337532	7,6,5,4,3	chr10:28414020-28420488|chr10:28527664-28543702
chr10:28436411-28491200	0	0	0	0	2	0	chr10	28436411	28491200	-	3	81,78,119	0,2499,54670	circRNA	MPP7	ENST00000337532	6,5,4	chr10:28420620-28436411|chr10:28491200-28527496
chr10:28436411-28527664	1	2	0	5	4	1	chr10	28436411	28527664	-	4	81,78,119,168	0,2499,54670,91085	circRNA	MPP7	ENST00000337532	6,5,4,3	chr10:28420620-28436411|chr10:28527664-28543702
chr10:28491081-28527664	0	0	0	3	3	1	chr10	28491081	28527664	-	2	119.168	0.36415	circRNA	MPP7	ENST00000337532	4.3	chr10:28438988-28491081|chr10:28527664-28543702
chr10:28824490-28879761	0	0	1	0	1	2	chr10	28824490	28879761	+	4	196,107,116,113	0,47837,54174,55158	circRNA	WAC	ENST00000375664	3,4,5,6	chr10:28822963-28824490|chr10:28879761-28884661
chr10:28824490-28884970	0	0	0	0	0	3	chr10	28824490	28884970	+	5	196,107,116,113,309	0,47837,54174,55158,60171	circRNA	WAC	ENST00000375664	3,4,5,6,7	chr10:28822963-28824490|chr10:28884970-28897114
chr10:28872327-28884970	1	0	2	0	3	1	chr10	28872327	28884970	+	4	107,116,113,309	0,6337,7321,12334	circRNA	WAC	ENST00000375664	4,5,6,7	chr10:28824686-28872327|chr10:28884970-28897114
chr10:30739186-30739448	0	0	0	2	2	1	chr10	30739186	30739448	+	1	262	0	circRNA	MAP3K8	ENST00000263056	5	chr10:30736878-30739186|chr10:30739448-30740566
chr10:30739186-30740673	2	1	1	3	0	1	chr10	30739186	30740673	+	2	262.107	0.138	circRNA	MAP3K8	ENST00000263056	5.6	chr10:30736878-30739186|chr10:30740673-30747012
chr10:3143556-3151672	1	1	0	5	5	1	chr10	3143556	3151672	+	7	190,166,45,109,96,93,126	0,2414,3750,4028,5849,7336,7990	circRNA	PFKP	ENST00000381125	4,5,6,7,8,9,10	chr10:3141544-3143556|chr10:3151672-3154413
chr10:3160973-3162236	5	14	15	17	18	21	chr10	3160973	3162236	+	2	88.153	0.111	circRNA	PFKP	ENST00000381125	15.16	chr10:3159038-3160973|chr10:3162236-3172010
chr10:3160973-3175506	0	0	0	0	2	1	chr10	3160973	3175506	+	5	88,153,165,62,112	0,1110,11037,13598,14421	circRNA	PFKP	ENST00000381125	15,16,17,18,19	chr10:3159038-3160973|chr10:3175506-3176674
chr10:31661946-31750166	0	1	3	0	0	0	chr10	31661946	31750166	+	4	156,162,143,201	0,1785,14106,88019	circRNA	ZEB1	ENST00000488625	3,4,5,6	chr10:31608062-31661946|chr10:31750166-31784704
chr10:3200231-3202522	0	2	1	5	2	2	chr10	3200231	3202522	-	4	114,129,89,127	0,874,1808,2164	circRNA	PITRM1	uc001igr.2	11,10,9,8	chr10:3199723-3200231|chr10:3202522-3205916
chr10:3201105-3202522	0	1	3	4	0	2	chr10	3201105	3202522	-	3	129,89,127	0,934,1290	circRNA	PITRM1	uc001igr.2	10,9,8	chr10:3200345-3201105|chr10:3202522-3205916
chr10:3205916-3209234	0	0	1	2	1	1	chr10	3205916	3209234	-	5	161,97,115,152,107	0,1513,1688,2504,3211	circRNA	PITRM1	uc001igr.2	7,6,5,4,3	chr10:3202522-3205916|chr10:3209234-3212295
chr10:32197099-32199491	5	26	48	53	94	40	chr10	32197099	32199491	-	2	755.39	0.2353	circRNA	ARHGAP12	NM_001270695	3.2	chr10:32150586-32197099|chr10:32199491-32217610
chr10:32306070-32308887	0	0	1	1	2	1	chr10	32306070	32308887	-	5	217,105,72,61,102	0,909,1173,1359,2715	circRNA	KIF5B	ENST00000302418	24,23,22,21,20	chr10:32304587-32306070|chr10:32308887-32309949
chr10:32308785-32310215	0	2	4	2	4	10	chr10	32308785	32310215	-	3	102,110,62	0,1164,1368	circRNA	KIF5B	ENST00000302418	20,19,18	chr10:32307490-32308785|chr10:32310215-32311067
chr10:32309949-32310215	0	0	2	0	0	1	chr10	32309949	32310215	-	2	110.62	0.204	circRNA	KIF5B	ENST00000302418	19.18	chr10:32308887-32309949|chr10:32310215-32311067
chr10:32311067-32311964	0	0	0	0	0	2	chr10	32311067	32311964	-	2	118.189	0.708	circRNA	KIF5B	ENST00000302418	17.16	chr10:32310215-32311067|chr10:32311964-32317355
chr10:32317355-32326535	0	1	0	1	2	1	chr10	32317355	32326535	-	9	144,207,69,194,149,146,105,125,88	0,2645,4278,5417,6262,7094,7462,8826,9092	circRNA	KIF5B	ENST00000302418	15,14,13,12,11,10,9,8,7	chr10:32311964-32317355|chr10:32326535-32327090
chr10:32323617-32326535	1	1	2	4	4	1	chr10	32323617	32326535	-	5	149,146,105,125,88	0,832,1200,2564,2830	circRNA	KIF5B	ENST00000302418	11,10,9,8,7	chr10:32322966-32323617|chr10:32326535-32327090
chr10:32740519-32751977	0	0	2	2	3	1	chr10	32740519	32751977	+	5	330,93,84,21,33	0,1752,4659,11091,11425	circRNA	CCDC7	NR_109827	2,3,4,5,6	chr10:32735559-32740519|chr10:32751977-32761408
chr10:32740519-32762951	2	16	18	40	29	21	chr10	32740519	32762951	+	7	330,93,84,21,33,62,57	0,1752,4659,11091,11425,20889,22375	circRNA	CCDC7	NR_109827	2,3,4,5,6,7,8	chr10:32735559-32740519|chr10:32762951-32800436
chr10:32759991-32762951	1	2	2	7	3	4	chr10	32759991	32762951	+	3	167,62,57	0,1417,2903	circRNA	CCDC7	NM_001026383	7,8,9	chr10:32751977-32759991|chr10:32762951-32780849
chr10:32832227-32873232	3	6	11	13	5	7	chr10	32832227	32873232	+	7	86,55,63,222,35,274,73	0,947,22258,24370,28559,39734,40932	circRNA	CCDC7	NM_001321115	13,14,15,16,17,18,19	chr10:32807433-32832227|chr10:32873232-32923181
chr10:32832227-32924086	0	0	2	1	0	2	chr10	32832227	32924086	+	9	86,55,63,222,35,274,73,111,102	0,947,22258,24370,28559,39734,40932,90954,91757	circRNA	CCDC7	NM_001321115	13,14,15,16,17,18,19,20,21	chr10:32807433-32832227|chr10:32924086-32952981
chr10:32854485-32873232	1	10	3	11	18	9	chr10	32854485	32873232	+	5	63,222,35,274,73	0,2112,6301,17476,18674	circRNA	CCDC7	NM_001321115	15,16,17,18,19	chr10:32833229-32854485|chr10:32873232-32923181
chr10:32854485-32924086	0	0	2	2	1	2	chr10	32854485	32924086	+	7	63,222,35,274,73,111,102	0,2112,6301,17476,18674,68696,69499	circRNA	CCDC7	NM_001321115	15,16,17,18,19,20,21	chr10:32833229-32854485|chr10:32924086-32952981
chr10:32854485-32975008	0	0	0	0	2	0	chr10	32854485	32975008	+	9	63,222,35,274,73,111,102,108,111	0,2112,6301,17476,18674,68696,69499,98496,120412	circRNA	CCDC7	NM_001321115	15,16,17,18,19,20,21,22,23	chr10:32833229-32854485|chr10:32975008-32977980
chr10:33093942-33113532	1	0	3	4	2	3	chr10	33093942	33113532	+	3	84,84,87	0,9355,19503	circRNA	CCDC7	NM_001321115	31,32,33	chr10:33068012-33093942|chr10:33113532-33123742
chr10:34558584-34573173	0	3	1	7	10	5	chr10	34558584	34573173	-	2	243.111	0.14478	circRNA	PARD3	ENST00000545260	20.19	chr10:34420511-34558584|chr10:34573173-34606034
chr10:34648074-34673182	0	0	0	2	5	0	chr10	34648074	34673182	-	6	171,189,129,140,383,126	0,924,15727,18820,23393,24982	circRNA	PARD3	ENST00000545260	12,11,10,9,8,7	chr10:34637043-34648074|chr10:34673182-34688257
chr10:34739244-34806087	0	0	1	2	4	0	chr10	34739244	34806087	-	3	132,179,181	0,19768,66662	circRNA	PARD3	ENST00000545693	5,4,3	chr10:34690845-34739244|chr10:34806087-34985245
chr10:35302626-35320547	0	1	2	2	2	2	chr10	35302626	35320547	-	7	102,203,67,78,153,87,129	0,2493,11433,15111,15789,17601,17792	circRNA	CUL2	ENST00000374746	18,17,16,15,14,13,12	chr10:35299370-35302626|chr10:35320547-35321362
chr10:35314059-35322201	2	0	0	0	3	0	chr10	35314059	35322201	-	7	67,78,153,87,129,60,108	0,3678,4356,6168,6359,7303,8034	circRNA	CUL2	ENST00000374746	16,15,14,13,12,11,10	chr10:35305322-35314059|chr10:35322201-35324099
chr10:35321362-35333796	0	2	1	0	4	2	chr10	35321362	35333796	-	6	60,108,125,163,111,97	0,731,2737,6485,12131,12337	circRNA	CUL2	ENST00000374746	11,10,9,8,7,6	chr10:35320547-35321362|chr10:35333796-35338610
chr10:35321362-35338693	0	0	3	0	1	1	chr10	35321362	35338693	-	7	60,108,125,163,111,97,83	0,731,2737,6485,12131,12337,17248	circRNA	CUL2	ENST00000374746	11,10,9,8,7,6,5	chr10:35320547-35321362|chr10:35338693-35343361
chr10:35349801-35360267	5	2	1	5	3	3	chr10	35349801	35360267	-	3	95,103,141	0,2086,10325	circRNA	CUL2	NM_001198778	4,3,2	chr10:35343467-35349801|chr10:35360267-35363119
chr10:35426709-35468204	0	0	0	0	2	0	chr10	35426709	35468204	+	5	98,124,147,98,143	0,10586,38071,41107,41352	circRNA	CREM	ENST00000374721	2,3,4,5,6	chr10:35416121-35426709|chr10:35468204-35495822
chr10:35805450-35819171	1	5	6	7	1	6	chr10	35805450	35819171	+	4	101,36,58,120	0,9441,13450,13601	circRNA	CCNY	NM_181698	6,7,8,9	chr10:35790463-35805450|chr10:35819171-35841946
chr10:35818900-35855113	0	2	1	1	0	0	chr10	35818900	35855113	+	4	58,120,167,163	0,151,23046,36050	circRNA	CCNY	NM_181698	8,9,10,11	chr10:35814927-35818900|chr10:35855113-35857981
chr10:38092760-38127039	0	0	1	0	2	0	chr10	38092760	38127039	-	5	111,81,92,96,127	0,27399,29192,33784,34152	circRNA	ZNF248	NR_147995	7,6,5,4,3	chr10:38065503-38092760|chr10:38127039-38145223
chr10:38120159-38127039	1	0	3	1	1	1	chr10	38120159	38127039	-	4	81,92,96,127	0,1793,6385,6753	circRNA	ZNF248	NR_147995	6,5,4,3	chr10:38092871-38120159|chr10:38127039-38145223
chr10:38120159-38145265	0	2	0	2	1	1	chr10	38120159	38145265	-	5	81,92,96,127,42	0,1793,6385,6753,25064	circRNA	ZNF248	NR_147995	6,5,4,3,2	chr10:38092871-38120159|chr10:38145265-38146112
chr10:38301225-38306314	0	0	3	0	2	0	chr10	38301225	38306314	+	3	53,145,96	0,4573,4993	circRNA	ZNF33A	ENST00000374618	2,3,4	chr10:38299711-38301225|chr10:38306314-38343302
chr10:38301225-38323328	0	0	0	2	0	1	chr10	38301225	38323328	+	4	53,145,96,123	0,4573,4993,21980	circRNA	ZNF33A	NM_001278171	2,3,4,5	chr10:38299711-38301225|chr10:38323328-38343302
chr10:43650344-43654379	0	2	2	1	2	2	chr10	43650344	43654379	+	2	914.217	0.3818	circRNA	CSGALNACT2	uc001jam.2	2.3	chr10:43634015-43650344|chr10:43654379-43655941
chr10:43650344-43662546	0	3	0	2	0	0	chr10	43650344	43662546	+	5	914,217,102,179,95	0,3818,5597,8969,12107	circRNA	CSGALNACT2	NM_018590	2,3,4,5,6	chr10:43634015-43650344|chr10:43662546-43671398
chr10:43650344-43671480	3	1	2	5	2	5	chr10	43650344	43671480	+	6	914,217,102,179,95,82	0,3818,5597,8969,12107,21054	circRNA	CSGALNACT2	NM_018590	2,3,4,5,6,7	chr10:43634015-43650344|chr10:43671480-43678697
chr10:43659313-43671480	0	0	0	1	2	0	chr10	43659313	43671480	+	3	179,95,82	0,3138,12085	circRNA	CSGALNACT2	NM_018590	5,6,7	chr10:43656043-43659313|chr10:43671480-43678697
chr10:46028557-46048652	0	0	2	0	2	1	chr10	46028557	46048652	-	2	180.93	0.20002	circRNA	2008-03-01	ENST00000395771	3.2	chr10:45984865-46028557|chr10:46048652-46089682
chr10:46121398-46135411	0	2	0	1	2	0	chr10	46121398	46135411	-	2	1155.15	0.13865	circRNA	ZFAND4	NM_001282905	8.7	chr10:46120085-46121398|chr10:46135411-46143741
chr10:46158027-46159290	0	0	2	0	0	0	chr10	46158027	46159290	-	2	102.301	0.962	circRNA	ZFAND4	NM_001282905	3.2	chr10:46148507-46158027|chr10:46159290-46167697
chr10:46224309-46235694	0	1	2	1	4	1	chr10	46224309	46235694	+	3	165,63,174	0,9121,11211	circRNA	FAM21C	ENST00000336378	3,4,5	chr10:46222987-46224309|chr10:46235694-46238837
chr10:4872866-4884696	2	3	3	0	3	4	chr10	4872866	4884696	+	4	168,135,123,84	0,5000,6784,11746	circRNA	AKR1E2	uc010qam.2	2,3,4,5	chr10:4868555-4872866|chr10:4884696-4887969
chr10:4872866-4889491	0	1	5	7	0	1	chr10	4872866	4889491	+	8	168,117,135,123,98,73,84,152	0,2675,5000,6784,9054,11110,11746,16473	circRNA	AKR1E2	NR_073125	2,3,4,5,6,7,8,9	chr10:4868555-4872866|chr10:4889491-4889679
chr10:49533939-49613024	0	1	0	1	0	2	chr10	49533939	49613024	+	3	69,171,130	0,75715,78955	circRNA	MAPK8	NM_001323302	3,4,5	chr10:49516331-49533939|chr10:49613024-49617921
chr10:49609654-49613024	0	0	2	1	3	0	chr10	49609654	49613024	+	2	171.13	0.324	circRNA	MAPK8	NM_001278547	2.3	chr10:49514864-49609654|chr10:49613024-49617921
chr10:49609654-49618211	2	1	7	5	4	8	chr10	49609654	49618211	+	4	171,130,59,139	0,3240,8267,8418	circRNA	MAPK8	NM_001278547	2,3,4,5	chr10:49514864-49609654|chr10:49618211-49628197
chr10:49609654-49628363	0	0	0	2	0	0	chr10	49609654	49628363	+	5	171,130,59,139,166	0,3240,8267,8418,18543	circRNA	MAPK8	NM_001278547	2,3,4,5,6	chr10:49514864-49609654|chr10:49628363-49632556
chr10:50098623-50109908	1	1	2	2	0	0	chr10	50098623	50109908	+	4	149,121,86,63	0,6875,9642,11222	circRNA	WDFY4	NM_020945	44,45,46,47	chr10:50085244-50098623|chr10:50109908-50149850
chr10:50668418-50714058	0	0	0	3	1	0	chr10	50668418	50714058	-	15	79,205,708,146,95,120,111,216,96,117,177,171,136,159,129	0,979,9809,10602,12003,12536,13104,13654,15842,17981,22314,22973,32744,40165,45511	circRNA	ERCC6	NM_000124	20,19,18,17,16,15,14,13,12,11,10,9,8,7,6	chr10:50667280-50668418|chr10:50714058-50732078
chr10:50701162-50714058	1	0	1	6	0	2	chr10	50701162	50714058	-	3	136,159,129	0,7421,12767	circRNA	ERCC6	NM_000124	8,7,6	chr10:50691562-50701162|chr10:50714058-50732078
chr10:51123962-51364771	2	6	3	5	4	4	chr10	51123962	51364771	-	6	75,84,119,188,987,67	0,6419,6630,237760,238838,240742	circRNA	PARG	NM_001303486	7,6,5,4,3,2	chr10:51093341-51123962|chr10:51364771-51371284
chr10:51374369-51387763	1	2	6	6	12	7	chr10	51374369	51387763	+	5	59,94,85,59,111	0,7069,7392,9929,13283	circRNA	TIMM23B	NM_001290117	2,3,4,5,6	chr10:51371646-51374369|chr10:51387763-51732771
chr10:51381438-51387763	0	2	3	1	0	2	chr10	51381438	51387763	+	4	94,85,59,111	0,323,2860,6214	circRNA	TIMM23B	NM_001290117	3,4,5,6	chr10:51374428-51381438|chr10:51387763-51732771
chr10:51579127-51581378	0	2	2	1	1	3	chr10	51579127	51581378	+	4	155,141,89,109	0,1428,1752,2142	circRNA	NCOA4	ENST00000438493	3,4,5,6	chr10:51568390-51579127|chr10:51581378-51582182
chr10:51582182-51585599	0	2	1	6	4	4	chr10	51582182	51585599	+	3	90,144,984	0,613,2433	circRNA	NCOA4	ENST00000438493	7,8,9	chr10:51581378-51582182|chr10:51585599-51586270
chr10:51584615-51585599	0	1	5	6	5	5	chr10	51584615	51585599	+	1	984	0	circRNA	NCOA4	ENST00000438493	9	chr10:51582939-51584615|chr10:51585599-51586270
chr10:51606987-51613311	3	4	3	2	3	1	chr10	51606987	51613311	-	4	111,59,85,94	0,3405,5916,6230	circRNA	TIMM23	ENST00000260867	6,5,4,3	chr10:51592619-51606987|chr10:51613311-51620323
chr10:51606987-51620382	2	8	9	5	13	9	chr10	51606987	51620382	-	5	111,59,85,94,59	0,3405,5916,6230,13336	circRNA	TIMM23	ENST00000260867	6,5,4,3,2	chr10:51592619-51606987|chr10:51620382-51623108
chr10:51829306-51840691	1	4	4	3	6	4	chr10	51829306	51840691	+	3	165,63,174	0,9128,11211	circRNA	FAM21A	ENST00000314664	3,4,5	chr10:51827987-51829306|chr10:51840691-51843831
chr10:51838434-51840691	1	1	0	2	2	3	chr10	51838434	51840691	+	2	63.174	0.2083	circRNA	FAM21A	ENST00000314664	4.5	chr10:51829471-51838434|chr10:51840691-51843831
chr10:52100146-52104105	0	1	3	1	2	1	chr10	52100146	52104105	-	3	78,218,854	0,830,3105	circRNA	SGMS1	uc021pqp.1	3,2,1	chr10:52087082-52100146|None
chr10:52103251-52104105	1	0	3	0	6	3	chr10	52103251	52104105	-	1	854	0	circRNA	SGMS1	NM_147156	7	chr10:52087082-52103251|chr10:52104105-52193235
chr10:52193235-52226692	2	12	17	15	13	22	chr10	52193235	52226692	-	3	81,142,43	0,27197,33414	circRNA	SGMS1	NM_147156	6,5,4	chr10:52104105-52193235|chr10:52226692-52279590
chr10:52193235-52279681	0	4	2	10	12	5	chr10	52193235	52279681	-	4	81,142,43,91	0,27197,33414,86355	circRNA	SGMS1	NM_147156	6,5,4,3	chr10:52104105-52193235|chr10:52279681-52349912
chr10:52193235-52350007	8	30	26	50	118	56	chr10	52193235	52350007	-	5	81,142,43,91,95	0,27197,33414,86355,156677	circRNA	SGMS1	NM_147156	6,5,4,3,2	chr10:52104105-52193235|chr10:52350007-52383466
chr10:52220432-52226692	2	6	4	5	8	7	chr10	52220432	52226692	-	2	142.43	0.6217	circRNA	SGMS1	NM_147156	5.4	chr10:52193316-52220432|chr10:52226692-52279590
chr10:52220432-52279681	2	0	1	1	1	3	chr10	52220432	52279681	-	3	142,43,91	0,6217,59158	circRNA	SGMS1	NM_147156	5,4,3	chr10:52193316-52220432|chr10:52279681-52349912
chr10:52220432-52350007	1	6	7	16	24	8	chr10	52220432	52350007	-	4	142,43,91,95	0,6217,59158,129480	circRNA	SGMS1	NM_147156	5,4,3,2	chr10:52193316-52220432|chr10:52350007-52383466
chr10:52279590-52350007	1	0	4	3	5	1	chr10	52279590	52350007	-	2	91.95	0.70322	circRNA	SGMS1	NM_147156	3.2	chr10:52226692-52279590|chr10:52350007-52383466
chr10:54031109-54050050	0	0	1	0	2	1	chr10	54031109	54050050	+	7	140,90,142,164,123,63,67	0,1042,9439,10803,17376,17581,18874	circRNA	PRKG1	NM_001098512	11,12,13,14,15,16,17	chr10:54011426-54031109|chr10:54050050-54053561
chr10:54040548-54050050	0	1	0	2	5	0	chr10	54040548	54050050	+	5	142,164,123,63,67	0,1364,7937,8142,9435	circRNA	PRKG1	NM_001098512	13,14,15,16,17	chr10:54032241-54040548|chr10:54050050-54053561
chr10:54061020-54073245	0	2	0	0	0	0	chr10	54061020	54073245	-	3	140,138,88	0,8139,12137	circRNA	PRKG1-AS1	NR_038277	4,3,2	chr10:54060598-54061020|chr10:54073245-54073393
chr10:5751492-5754881	0	0	3	0	0	1	chr10	5751492	5754881	+	2	134.96	0.3293	circRNA	FAM208B	ENST00000473789	2.3	chr10:5727138-5751492|chr10:5754881-5756097
chr10:5765639-5773166	0	0	2	0	0	0	chr10	5765639	5773166	+	5	101,104,73,63,717	0,753,3208,3384,6810	circRNA	FAM208B	ENST00000328090	7,8,9,10,11	chr10:5762933-5765639|chr10:5773166-5777266
chr10:5777266-5777509	0	0	0	2	1	0	chr10	5777266	5777509	+	1	243	0	circRNA	FAM208B	ENST00000328090	12	chr10:5773166-5777266|chr10:5777509-5781580
chr10:5810175-5842668	1	0	0	3	2	4	chr10	5810175	5842668	-	7	172,100,132,199,135,100,108	0,5629,16929,17639,26672,28550,32385	circRNA	GDI2	ENST00000380191	8,7,6,5,4,3,2	chr10:5808601-5810175|chr10:5842668-5855176
chr10:5815804-5828013	0	2	1	1	1	1	chr10	5815804	5828013	-	3	100,132,199	0,11300,12010	circRNA	GDI2	ENST00000380191	7,6,5	chr10:5810347-5815804|chr10:5828013-5836847
chr10:5815804-5842668	5	21	26	21	29	30	chr10	5815804	5842668	-	6	100,132,199,135,100,108	0,11300,12010,21043,22921,26756	circRNA	GDI2	ENST00000380191	7,6,5,4,3,2	chr10:5810347-5815804|chr10:5842668-5855176
chr10:5827104-5842668	6	5	11	11	8	12	chr10	5827104	5842668	-	5	132,199,135,100,108	0,710,9743,11621,15456	circRNA	GDI2	ENST00000380191	6,5,4,3,2	chr10:5815904-5827104|chr10:5842668-5855176
chr10:5827814-5842668	0	0	1	2	4	2	chr10	5827814	5842668	-	4	199,135,100,108	0,9033,10911,14746	circRNA	GDI2	ENST00000380191	5,4,3,2	chr10:5827236-5827814|chr10:5842668-5855176
chr10:5836847-5842668	4	22	18	29	30	29	chr10	5836847	5842668	-	3	135,100,108	0,1878,5713	circRNA	GDI2	ENST00000380191	4,3,2	chr10:5828013-5836847|chr10:5842668-5855176
chr10:5838725-5842668	1	1	1	2	1	3	chr10	5838725	5842668	-	2	100.108	0.3835	circRNA	GDI2	ENST00000380191	3.2	chr10:5836982-5838725|chr10:5842668-5855176
chr10:5924968-5927728	0	0	0	0	2	0	chr10	5924968	5927728	-	3	162,109,43	0,963,2717	circRNA	ANKRD16	ENST00000380094	5,4,3	chr10:5922339-5924968|chr10:5927728-5929809
chr10:5944982-5951257	0	0	0	0	3	0	chr10	5944982	5951257	+	4	156,596,131,136	0,3017,5905,6139	circRNA	FBXO18	ENST00000397269	2,3,4,5	chr10:5931704-5944982|chr10:5951257-5952900
chr10:5950887-5951257	0	0	1	2	0	0	chr10	5950887	5951257	+	2	131.136	0.234	circRNA	FBXO18	ENST00000397269	4.5	chr10:5948595-5950887|chr10:5951257-5952900
chr10:59975905-59997575	0	0	2	0	0	0	chr10	59975905	59997575	-	3	173,97,86	0,10898,21584	circRNA	IPMK	ENST00000373935	4,3,2	chr10:59959082-59975905|chr10:59997575-60027181
chr10:6483854-6549458	0	0	0	0	3	0	chr10	6483854	6549458	-	13	189,139,63,92,174,161,118,110,130,86,32,163,61	0,14781,20410,22420,37099,41547,43259,44142,49790,55142,55327,56503,65543	circRNA	PRKCQ	NM_001323267	16,15,14,13,12,11,10,9,8,7,6,5,4	chr10:6472900-6483854|chr10:6549458-6552956
chr10:64936056-64937616	0	0	0	2	1	0	chr10	64936056	64937616	-	2	177.14	0.142	circRNA	JMJD1C	NM_001282948	23.22	chr10:64928326-64936056|chr10:64937616-64943206
chr10:64936056-64960437	0	0	0	1	4	1	chr10	64936056	64960437	-	14	177,140,123,131,91,169,279,215,214,128,90,153,215,202	0,1420,7150,8311,9266,9918,12871,14597,16641,17048,17989,21114,22216,24179	circRNA	JMJD1C	NM_001282948	23,22,21,20,19,18,17,16,15,14,13,12,11,10	chr10:64928326-64936056|chr10:64960437-64966354
chr10:6498635-6549458	0	0	1	1	4	4	chr10	6498635	6549458	-	12	139,63,92,174,161,118,110,130,86,32,163,61	0,5629,7639,22318,26766,28478,29361,35009,40361,40546,41722,50762	circRNA	PRKCQ	NM_001323267	15,14,13,12,11,10,9,8,7,6,5,4	chr10:6484043-6498635|chr10:6549458-6552956
chr10:6520953-6540520	0	2	1	3	4	3	chr10	6520953	6540520	-	8	174,161,118,110,130,86,32,163	0,4448,6160,7043,12691,18043,18228,19404	circRNA	PRKCQ	NM_001323267	12,11,10,9,8,7,6,5	chr10:6506366-6520953|chr10:6540520-6549397
chr10:6525401-6549458	0	0	1	0	2	0	chr10	6525401	6549458	-	8	161,118,110,130,86,32,163,61	0,1712,2595,8243,13595,13780,14956,23996	circRNA	PRKCQ	NM_001323267	11,10,9,8,7,6,5,4	chr10:6521127-6525401|chr10:6549458-6552956
chr10:6533644-6549458	0	0	0	1	2	0	chr10	6533644	6549458	-	5	130,86,32,163,61	0,5352,5537,6713,15753	circRNA	PRKCQ	NM_001323267	8,7,6,5,4	chr10:6528106-6533644|chr10:6549458-6552956
chr10:65369946-65379560	0	1	0	5	3	0	chr10	65369946	65379560	+	2	148.146	0.9468	circRNA	REEP3	ENST00000298249	6.7	chr10:65359043-65369946|chr10:65379560-65380572
chr10:67345422-67375519	0	3	1	0	1	1	chr10	67345422	67375519	+	2	138.126	0.29971	circRNA	RP11-222A11.1	ENST00000433152	5.6	chr10:67345325-67345422|chr10:67375519-67440717
chr10:69692353-69773943	0	0	0	0	0	2	chr10	69692353	69773943	-	17	184,83,67,167,144,168,99,120,102,173,190,112,60,125,2687,93,161	0,3556,6991,8342,21998,22366,24281,34086,55446,56066,57614,58307,58543,59602,60009,63449,81429	circRNA	HERC4	uc001jnf.4	23,22,21,20,19,18,17,16,15,14,13,12,11,10,9,8,7	chr10:69684944-69692353|chr10:69773943-69785302
chr10:69699344-69700862	0	3	1	1	3	1	chr10	69699344	69700862	-	2	64.167	0.1351	circRNA	HERC4	uc009xpq.3	12.11	chr10:69695992-69699344|chr10:69700862-69714351
chr10:69714351-69726559	0	2	0	0	0	3	chr10	69714351	69726559	-	4	144,168,99,120	0,368,2283,12088	circRNA	HERC4	uc009xpq.3	10,9,8,7	chr10:69700862-69714351|chr10:69726559-69748419
chr10:69714351-69773943	1	4	5	6	9	6	chr10	69714351	69773943	-	13	144,168,99,120,102,173,190,112,60,125,2687,93,161	0,368,2283,12088,33448,34068,35616,36309,36545,37604,38011,41451,59431	circRNA	HERC4	uc001jnf.4	19,18,17,16,15,14,13,12,11,10,9,8,7	chr10:69700862-69714351|chr10:69773943-69785302
chr10:69726439-69752439	0	1	1	4	1	3	chr10	69726439	69752439	-	7	120,173,190,112,60,125,77	0,21980,23528,24221,24457,25516,25923	circRNA	HERC4	NM_001278185	16,15,14,13,12,11,10	chr10:69718893-69726439|chr10:69752439-69773782
chr10:69726439-69773943	2	3	7	10	6	13	chr10	69726439	69773943	-	10	120,102,173,190,112,60,125,2687,93,161	0,21360,21980,23528,24221,24457,25516,25923,29363,47343	circRNA	HERC4	uc001jnf.4	16,15,14,13,12,11,10,9,8,7	chr10:69716733-69726439|chr10:69773943-69785302
chr10:69726439-69785433	0	0	0	0	1	2	chr10	69726439	69785433	-	11	120,102,173,190,112,60,125,2687,93,161,131	0,21360,21980,23528,24221,24457,25516,25923,29363,47343,58863	circRNA	HERC4	uc001jnf.4	16,15,14,13,12,11,10,9,8,7,6	chr10:69716733-69726439|chr10:69785433-69792534
chr10:69726439-69832943	0	0	0	0	2	0	chr10	69726439	69832943	-	14	120,173,190,112,60,125,77,161,131,92,222,77,160,304	0,21980,23528,24221,24457,25516,25923,47343,58863,66095,67282,71410,77721,106200	circRNA	HERC4	NM_001278185	16,15,14,13,12,11,10,9,8,7,6,5,4,3	chr10:69718893-69726439|chr10:69832943-69833413
chr10:69748419-69773943	0	2	2	2	5	3	chr10	69748419	69773943	-	8	173,190,112,60,125,2687,93,161	0,1548,2241,2477,3536,3943,7383,25363	circRNA	HERC4	uc001jnf.4	14,13,12,11,10,9,8,7	chr10:69747901-69748419|chr10:69773943-69785302
chr10:69750660-69773943	1	0	2	0	0	0	chr10	69750660	69773943	-	6	112,60,125,2687,93,161	0,236,1295,1702,5142,23122	circRNA	HERC4	uc001jnf.4	12,11,10,9,8,7	chr10:69750157-69750660|chr10:69773943-69785302
chr10:69751955-69773943	0	2	0	2	1	0	chr10	69751955	69773943	-	4	125,2687,93,161	0,407,3847,21827	circRNA	HERC4	uc001jnf.4	10,9,8,7	chr10:69750956-69751955|chr10:69773943-69785302
chr10:69785302-69804320	1	2	6	1	7	6	chr10	69785302	69804320	-	5	131,92,222,77,160	0,7232,8419,12547,18858	circRNA	HERC4	uc001jnf.4	6,5,4,3,2	chr10:69773943-69785302|chr10:69804320-69832639
chr10:69785302-69833443	0	0	0	0	1	2	chr10	69785302	69833443	-	7	131,92,222,77,160,304,30	0,7232,8419,12547,18858,47337,48111	circRNA	HERC4	NM_001278185	8,7,6,5,4,3,2	chr10:69773943-69785302|chr10:69833443-69834900
chr10:70152894-70154208	2	3	3	2	0	4	chr10	70152894	70154208	-	3	66,62,124	0,937,1190	circRNA	RUFY2	ENST00000466493	7,6,5	chr10:70145885-70152894|chr10:70154208-70156536
chr10:70152894-70161494	1	0	0	2	1	0	chr10	70152894	70161494	-	5	66,62,124,102,118	0,937,1190,3642,8482	circRNA	RUFY2	ENST00000466493	7,6,5,4,3	chr10:70145885-70152894|chr10:70161494-70164427
chr10:70152894-70164601	0	0	0	2	0	1	chr10	70152894	70164601	-	6	66,62,124,102,118,174	0,937,1190,3642,8482,11533	circRNA	RUFY2	ENST00000466493	7,6,5,4,3,2	chr10:70145885-70152894|chr10:70164601-70166662
chr10:70153831-70154208	0	2	0	2	1	0	chr10	70153831	70154208	-	2	62.124	0.253	circRNA	RUFY2	ENST00000466493	6.5	chr10:70152960-70153831|chr10:70154208-70156536
chr10:70181981-70229920	0	1	4	0	0	1	chr10	70181981	70229920	-	16	205,90,194,220,115,110,117,231,195,163,118,220,132,146,184,183	0,290,472,8211,9632,9981,10169,14786,20692,22696,24071,27803,36879,43442,45898,47756	circRNA	DNA2	NM_001080449	17,16,15,14,13,12,11,10,9,8,7,6,5,4,3,2	chr10:70179649-70181981|chr10:70229920-70231547
chr10:70190192-70229920	0	2	2	3	1	2	chr10	70190192	70229920	-	13	220,115,110,117,231,195,163,118,220,132,146,184,183	0,1421,1770,1958,6575,12481,14485,15860,19592,28668,35231,37687,39545	circRNA	DNA2	NM_001080449	14,13,12,11,10,9,8,7,6,5,4,3,2	chr10:70182647-70190192|chr10:70229920-70231547
chr10:70191618-70229920	1	3	0	0	0	0	chr10	70191618	70229920	-	12	110,110,117,231,195,163,118,220,132,146,184,183	0,344,532,5149,11055,13059,14434,18166,27242,33805,36261,38119	circRNA	DNA2	ENST00000551118	13,12,11,10,9,8,7,6,5,4,3,2	chr10:70179649-70191618|chr10:70229920-70231547
chr10:70196767-70229920	1	2	6	0	5	2	chr10	70196767	70229920	-	9	231,195,163,118,220,132,146,184,183	0,5906,7910,9285,13017,22093,28656,31112,32970	circRNA	DNA2	ENST00000551118	10,9,8,7,6,5,4,3,2	chr10:70192267-70196767|chr10:70229920-70231547
chr10:70202673-70210004	0	0	1	2	0	1	chr10	70202673	70210004	-	4	195,163,118,220	0,2004,3379,7111	circRNA	DNA2	ENST00000551118	9,8,7,6	chr10:70196998-70202673|chr10:70210004-70218860
chr10:70202673-70229920	1	0	6	2	1	5	chr10	70202673	70229920	-	8	195,163,118,220,132,146,184,183	0,2004,3379,7111,16187,22750,25206,27064	circRNA	DNA2	ENST00000551118	9,8,7,6,5,4,3,2	chr10:70196998-70202673|chr10:70229920-70231547
chr10:70209784-70229920	2	0	0	9	1	3	chr10	70209784	70229920	-	5	220,132,146,184,183	0,9076,15639,18095,19953	circRNA	DNA2	ENST00000551118	6,5,4,3,2	chr10:70206170-70209784|chr10:70229920-70231547
chr10:70218860-70229920	2	12	23	15	13	18	chr10	70218860	70229920	-	4	132,146,184,183	0,6563,9019,10877	circRNA	DNA2	ENST00000551118	5,4,3,2	chr10:70210004-70218860|chr10:70229920-70231547
chr10:70218860-70231642	0	0	0	0	0	2	chr10	70218860	70231642	-	5	132,146,184,183,95	0,6563,9019,10877,12687	circRNA	DNA2	NR_102264	6,5,4,3,2	chr10:70210004-70218860|chr10:70231642-70231810
chr10:70225423-70229920	0	0	0	2	0	1	chr10	70225423	70229920	-	3	146,184,183	0,2456,4314	circRNA	DNA2	ENST00000551118	4,3,2	chr10:70218992-70225423|chr10:70229920-70231547
chr10:70227879-70229920	7	32	30	37	39	32	chr10	70227879	70229920	-	2	184.183	0.1858	circRNA	DNA2	ENST00000551118	3.2	chr10:70225569-70227879|chr10:70229920-70231547
chr10:70246900-70253327	2	2	4	7	4	3	chr10	70246900	70253327	-	4	69,163,67,122	0,1323,5988,6305	circRNA	SLC25A16	ENST00000609923	8,7,6,5	chr10:70243345-70246900|chr10:70253327-70263388
chr10:70246900-70263452	0	1	0	1	2	0	chr10	70246900	70263452	-	5	69,163,67,122,64	0,1323,5988,6305,16488	circRNA	SLC25A16	ENST00000609923	8,7,6,5,4	chr10:70243345-70246900|chr10:70263452-70266341
chr10:70246900-70266475	1	2	0	1	2	1	chr10	70246900	70266475	-	6	69,163,67,122,64,134	0,1323,5988,6305,16488,19441	circRNA	SLC25A16	ENST00000609923	8,7,6,5,4,3	chr10:70243345-70246900|chr10:70266475-70276507
chr10:70246900-70276600	3	2	0	2	2	0	chr10	70246900	70276600	-	7	69,163,67,122,64,134,93	0,1323,5988,6305,16488,19441,29607	circRNA	SLC25A16	ENST00000609923	8,7,6,5,4,3,2	chr10:70243345-70246900|chr10:70276600-70287002
chr10:70404454-70406762	2	3	2	5	7	2	chr10	70404454	70406762	+	1	2308	0	circRNA	TET1	NM_030625	4	chr10:70360791-70404454|chr10:70406762-70411602
chr10:70411602-70427013	0	0	1	1	0	2	chr10	70411602	70427013	+	3	91,94,212	0,655,15199	circRNA	TET1	NM_030625	5,6,7	chr10:70406762-70411602|chr10:70427013-70432651
chr10:70497601-70502326	0	2	2	3	0	5	chr10	70497601	70502326	+	3	45,33,194	0,2784,4531	circRNA	CCAR1	NM_018237	4,5,6	chr10:70496805-70497601|chr10:70502326-70506917
chr10:70506917-70507323	1	1	1	0	1	3	chr10	70506917	70507323	+	2	115.193	0.213	circRNA	CCAR1	NM_001282959	6.7	chr10:70502326-70506917|chr10:70507323-70508892
chr10:70513608-70532856	2	2	3	3	3	3	chr10	70513608	70532856	+	9	226,114,167,211,84,186,192,240,112	0,862,1518,2421,3442,7155,12036,17354,19136	circRNA	CCAR1	NM_001282959	10,11,12,13,14,15,16,17,18	chr10:70509442-70513608|chr10:70532856-70545892
chr10:70514470-70517134	1	0	0	2	0	2	chr10	70514470	70517134	+	4	114,167,211,84	0,656,1559,2580	circRNA	CCAR1	NM_001282959	11,12,13,14	chr10:70513834-70514470|chr10:70517134-70520763
chr10:70517050-70532856	2	3	1	1	1	0	chr10	70517050	70532856	+	5	84,186,192,240,112	0,3713,8594,13912,15694	circRNA	CCAR1	NM_001282959	14,15,16,17,18	chr10:70516240-70517050|chr10:70532856-70545892
chr10:70520763-70532856	0	1	0	1	4	0	chr10	70520763	70532856	+	4	186,192,240,112	0,4881,10199,11981	circRNA	CCAR1	NM_001282959	15,16,17,18	chr10:70517134-70520763|chr10:70532856-70545892
chr10:70530962-70532856	2	1	0	1	0	0	chr10	70530962	70532856	+	2	240.112	0.1782	circRNA	CCAR1	NM_001282959	17.18	chr10:70525836-70530962|chr10:70532856-70545892
chr10:70545892-70546449	0	2	1	3	1	1	chr10	70545892	70546449	+	2	83.147	0.41	circRNA	CCAR1	NM_001282959	19.2	chr10:70532856-70545892|chr10:70546449-70547683
chr10:70547683-70548085	3	4	6	11	13	9	chr10	70547683	70548085	+	2	121.186	0.216	circRNA	CCAR1	NM_001282959	21.22	chr10:70546449-70547683|chr10:70548085-70549466
chr10:70665981-70670138	0	1	1	0	1	2	chr10	70665981	70670138	+	3	112,297,76	0,485,4081	circRNA	DDX50	ENST00000471475	2,3,4	chr10:70661227-70665981|chr10:70670138-70670823
chr10:70672917-70673960	0	0	3	0	0	0	chr10	70672917	70673960	+	3	118,186,146	0,229,897	circRNA	DDX50	ENST00000373585	5,6,7	chr10:70671002-70672917|chr10:70673960-70679587
chr10:70696691-70700950	0	0	0	2	2	1	chr10	70696691	70700950	+	2	160.135	0.4124	circRNA	DDX50	ENST00000373585	12.13	chr10:70695835-70696691|chr10:70700950-70702968
chr10:70696691-70703013	1	2	3	2	4	7	chr10	70696691	70703013	+	3	160,135,45	0,4124,6277	circRNA	DDX50	ENST00000373585	12,13,14	chr10:70695835-70696691|chr10:70703013-70706107
chr10:70719561-70720005	3	11	21	20	18	12	chr10	70719561	70720005	+	1	444	0	circRNA	DDX21	NM_004728	2	chr10:70716068-70719561|chr10:70720005-70721837
chr10:70719561-70726959	0	2	0	2	0	0	chr10	70719561	70726959	+	5	444,76,179,118,186	0,2276,3485,5571,7212	circRNA	DDX21	NM_004728	2,3,4,5,6	chr10:70716068-70719561|chr10:70726959-70728731
chr10:70723046-70726959	0	2	1	0	1	0	chr10	70723046	70726959	+	3	179,118,186	0,2086,3727	circRNA	DDX21	NM_004728	4,5,6	chr10:70721913-70723046|chr10:70726959-70728731
chr10:70915567-70917967	0	0	2	4	1	1	chr10	70915567	70917967	+	3	76,157,165	0,1195,2235	circRNA	VPS26A	ENST00000373382	4,5,6	chr10:70892803-70915567|chr10:70917967-70922161
chr10:71119652-71129380	0	2	1	3	2	0	chr10	71119652	71129380	+	5	149,120,96,100,184	0,4886,8639,9340,9544	circRNA	HK1	ENST00000360289	7,8,9,10,11	chr10:71103745-71119652|chr10:71129380-71136689
chr10:71124538-71129380	0	0	1	1	2	1	chr10	71124538	71129380	+	4	120,96,100,184	0,3753,4454,4658	circRNA	HK1	ENST00000360289	8,9,10,11	chr10:71119801-71124538|chr10:71129380-71136689
chr10:71136689-71139851	0	0	1	2	5	3	chr10	71136689	71139851	+	2	156.234	0.2928	circRNA	HK1	ENST00000360289	12.13	chr10:71129380-71136689|chr10:71139851-71142242
chr10:71243446-71244971	2	2	11	12	7	22	chr10	71243446	71244971	+	2	186.75	0.145	circRNA	TSPAN15	NM_012339	2.3	chr10:71211446-71243446|chr10:71244971-71255349
chr10:71243446-71258152	1	3	5	9	10	16	chr10	71243446	71258152	+	4	186,75,96,117	0,1450,11903,14589	circRNA	TSPAN15	NM_012339	2,3,4,5	chr10:71211446-71243446|chr10:71258152-71264193
chr10:71243446-71265996	0	0	0	0	0	3	chr10	71243446	71265996	+	6	186,75,96,117,48,117	0,1450,11903,14589,20747,22433	circRNA	TSPAN15	NM_012339	2,3,4,5,6,7	chr10:71211446-71243446|chr10:71265996-71266584
chr10:71968960-71978573	0	0	1	0	2	0	chr10	71968960	71978573	-	6	86,128,127,87,120,54	0,353,4258,5295,8607,9559	circRNA	PPA1	ENST00000373232	8,7,6,5,4,3	chr10:71966089-71968960|chr10:71978573-71990096
chr10:7230585-7327916	0	2	0	0	0	0	chr10	7230585	7327916	-	12	110,140,71,43,114,127,83,148,102,98,247,89	0,8924,11790,13856,17191,31787,39231,54934,59924,88268,95280,97242	circRNA	SFMBT2	ENST00000361972	16,15,14,13,12,11,10,9,8,7,6,5	chr10:7218127-7230585|chr10:7327916-7409610
chr10:7239509-7327916	0	0	0	2	0	0	chr10	7239509	7327916	-	11	140,71,43,114,127,83,148,102,98,247,89	0,2866,4932,8267,22863,30307,46010,51000,79344,86356,88318	circRNA	SFMBT2	ENST00000361972	15,14,13,12,11,10,9,8,7,6,5	chr10:7230695-7239509|chr10:7327916-7409610
chr10:72604229-72619256	0	0	2	0	0	0	chr10	72604229	72619256	+	5	166,68,148,77,129	0,6670,10235,13141,14898	circRNA	SGPL1	NM_003901	3,4,5,6,7	chr10:72576636-72604229|chr10:72619256-72628101
chr10:72628101-72631743	0	0	0	0	0	2	chr10	72628101	72631743	+	4	89,106,99,150	0,1447,2703,3492	circRNA	SGPL1	NM_003901	8,9,10,11	chr10:72619256-72628101|chr10:72631743-72633107
chr10:7285519-7327916	2	6	5	5	4	1	chr10	7285519	7327916	-	5	148,102,98,247,89	0,4990,33334,40346,42308	circRNA	SFMBT2	ENST00000361972	9,8,7,6,5	chr10:7269899-7285519|chr10:7327916-7409610
chr10:7318853-7327916	5	19	9	5	5	7	chr10	7318853	7327916	-	3	98,247,89	0,7012,8974	circRNA	SFMBT2	ENST00000361972	7,6,5	chr10:7290611-7318853|chr10:7327916-7409610
chr10:73912626-73973089	0	1	0	0	3	0	chr10	73912626	73973089	-	6	120,137,179,98,100,145	0,8669,43942,50558,57863,60318	circRNA	ASCC1	NM_001198798	7,6,5,4,3,2	chr10:73892939-73912626|chr10:73973089-73975593
chr10:73963184-73973089	0	2	0	0	0	0	chr10	73963184	73973089	-	3	98,100,145	0,7305,9760	circRNA	ASCC1	NM_001198798	4,3,2	chr10:73956747-73963184|chr10:73973089-73975593
chr10:73983645-73990198	1	0	3	0	1	0	chr10	73983645	73990198	+	2	169.75	0.6478	circRNA	ANAPC16	NM_001242546	3.4	chr10:73980137-73983645|chr10:73990198-73992758
chr10:74100546-74100928	4	3	6	8	11	6	chr10	74100546	74100928	-	2	80.186	0.196	circRNA	DNAJB12	ENST00000338820	5.4	chr10:74098069-74100546|chr10:74100928-74103123
chr10:74234857-74237014	0	0	1	0	2	0	chr10	74234857	74237014	-	2	198.83	0.2074	circRNA	MICU1	NM_001195519	3.2	chr10:74183129-74234857|chr10:74237014-74283559
chr10:74234857-74268027	0	0	3	1	1	2	chr10	74234857	74268027	-	4	198,83,111,115	0,2074,2393,33055	circRNA	MICU1	uc010qjw.2	5,4,3,2	chr10:74183129-74234857|chr10:74268027-74283559
chr10:74267912-74326552	0	0	0	0	1	2	chr10	74267912	74326552	-	5	115,44,163,169,162	0,25591,43024,54740,58478	circRNA	MICU1	NM_001195518	6,5,4,3,2	chr10:74237014-74267912|chr10:74326552-74385767
chr10:74293503-74326552	0	0	0	2	3	0	chr10	74293503	74326552	-	4	44,163,169,162	0,17433,29149,32887	circRNA	MICU1	NM_001195518	5,4,3,2	chr10:74268027-74293503|chr10:74326552-74385767
chr10:74310936-74326552	0	2	3	2	4	3	chr10	74310936	74326552	-	3	163,169,162	0,11716,15454	circRNA	MICU1	NM_001195518	4,3,2	chr10:74293547-74310936|chr10:74326552-74385767
chr10:74322652-74326552	2	3	7	9	13	10	chr10	74322652	74326552	-	2	169.162	0.3738	circRNA	MICU1	NM_001195518	3.2	chr10:74311099-74322652|chr10:74326552-74385767
chr10:74468040-74475660	5	16	12	15	26	12	chr10	74468040	74475660	+	3	74,116,49	0,6828,7571	circRNA	MCU	uc009xqp.1	2,3,4	chr10:74452059-74468040|chr10:74475660-74594116
chr10:74474868-74475660	3	5	5	3	6	5	chr10	74474868	74475660	+	2	116.49	0.743	circRNA	MCU	uc009xqp.1	3.4	chr10:74468114-74474868|chr10:74475660-74594116
chr10:74618934-74628621	0	0	2	2	0	0	chr10	74618934	74628621	+	3	171,105,161	0,1246,9526	circRNA	MCU	uc009xqp.1	6,7,8	chr10:74594186-74618934|chr10:74628621-74631134
chr10:74628460-74631338	0	1	0	1	4	1	chr10	74628460	74631338	+	2	161.204	0.2674	circRNA	MCU	ENST00000373053	5.6	chr10:74620285-74628460|chr10:74631338-74644023
chr10:74790028-74828741	0	3	1	1	0	0	chr10	74790028	74828741	-	6	100,71,177,197,240,138	0,13616,16654,20782,23080,38575	circRNA	P4HA1	uc021ptj.1	9,8,7,6,5,4	chr10:74776657-74790028|chr10:74828741-74831786
chr10:74906033-74923708	0	0	3	0	0	0	chr10	74906033	74923708	-	8	86,129,129,193,179,88,118,218	0,2000,6017,7980,9999,10292,14158,17457	circRNA	ECD	ENST00000372979	9,8,7,6,5,4,3,2	chr10:74899495-74906033|chr10:74923708-74927623
chr10:74952313-74970196	0	0	0	1	0	2	chr10	74952313	74970196	+	4	143,117,168,188	0,921,16063,17695	circRNA	FAM149B1	NM_173348	4,5,6,7	chr10:74937733-74952313|chr10:74970196-74987817
chr10:75138668-75139959	0	0	0	0	3	1	chr10	75138668	75139959	-	3	113,76,171	0,968,1120	circRNA	ANXA7	ENST00000372921	12,11,10	chr10:75135975-75138668|chr10:75139959-75142932
chr10:75142932-75143448	0	0	1	2	0	1	chr10	75142932	75143448	-	2	171.114	0.402	circRNA	ANXA7	ENST00000372921	9.8	chr10:75139959-75142932|chr10:75143448-75147446
chr10:75156276-75160615	0	0	2	2	2	4	chr10	75156276	75160615	-	4	65,111,205,55	0,645,1662,4284	circRNA	ANXA7	ENST00000372921	5,4,3,2	chr10:75148172-75156276|chr10:75160615-75173769
chr10:75204482-75214247	0	1	0	2	1	1	chr10	75204482	75214247	-	3	98,82,78	0,1767,9687	circRNA	PPP3CB	ENST00000360663	12,11,10	chr10:75199659-75204482|chr10:75214247-75227310
chr10:75214169-75239275	0	2	1	1	2	3	chr10	75214169	75239275	-	9	78,126,95,78,140,146,112,125,201	0,13141,16275,16475,16658,17056,20507,24087,24905	circRNA	PPP3CB	ENST00000360663	10,9,8,7,6,5,4,3,2	chr10:75206331-75214169|chr10:75239275-75255562
chr10:75227310-75239275	0	0	1	0	0	2	chr10	75227310	75239275	-	8	126,95,78,140,146,112,125,201	0,3134,3334,3517,3915,7366,10946,11764	circRNA	PPP3CB	ENST00000360663	9,8,7,6,5,4,3,2	chr10:75214247-75227310|chr10:75239275-75255562
chr10:75234676-75239275	0	0	1	0	2	3	chr10	75234676	75239275	-	3	112,125,201	0,3580,4398	circRNA	PPP3CB	ENST00000360663	4,3,2	chr10:75231371-75234676|chr10:75239275-75255562
chr10:75296026-75299351	0	0	1	0	2	1	chr10	75296026	75299351	-	2	169.15	0.3175	circRNA	USP54	ENST00000424265	4.3	chr10:75294528-75296026|chr10:75299351-75301132
chr10:75331178-75336119	0	4	1	1	4	0	chr10	75331178	75336119	-	3	93,164,564	0,4091,4377	circRNA	USP54	NR_135249	4,3,2	chr10:75305430-75331178|chr10:75336119-75351035
chr10:75464743-75481262	0	0	1	2	1	2	chr10	75464743	75481262	-	6	93,129,151,140,122,143	0,8218,13029,14174,15552,16376	circRNA	AGAP5	uc001juu.4	11,10,9,8,7,6	chr10:75457478-75464743|chr10:75481262-75482146
chr10:75472961-75481262	0	0	2	1	4	1	chr10	75472961	75481262	-	5	129,151,140,122,143	0,4811,5956,7334,8158	circRNA	AGAP5	uc001juu.4	10,9,8,7,6	chr10:75464836-75472961|chr10:75481262-75482146
chr10:75478917-75481262	0	0	0	0	2	0	chr10	75478917	75481262	-	3	140,122,143	0,1378,2202	circRNA	AGAP5	uc001juu.4	8,7,6	chr10:75477923-75478917|chr10:75481262-75482146
chr10:75830427-75832610	3	5	6	11	28	14	chr10	75830427	75832610	+	3	151,109,123	0,305,2060	circRNA	VCL	uc009xrr.3	5,6,7	chr10:75802911-75830427|chr10:75832610-75834500
chr10:75830427-75834661	8	23	21	45	59	43	chr10	75830427	75834661	+	4	151,109,123,161	0,305,2060,4073	circRNA	VCL	uc010qky.1	2,3,4,5	chr10:75758133-75830427|chr10:75834661-75842211
chr10:75830427-75843271	0	0	3	4	1	5	chr10	75830427	75843271	+	6	151,109,123,3006,91,148	0,305,2060,4073,11784,12696	circRNA	VCL	uc009xrr.3	5,6,7,8,9,10	chr10:75802911-75830427|chr10:75843271-75848953
chr10:75830427-75849956	0	0	0	4	4	4	chr10	75830427	75849956	+	8	151,109,123,3006,91,148,154,176	0,305,2060,4073,11784,12696,18526,19353	circRNA	VCL	uc009xrr.3	5,6,7,8,9,10,11,12	chr10:75802911-75830427|chr10:75849956-75854028
chr10:75830427-75854219	1	4	3	4	5	8	chr10	75830427	75854219	+	9	151,109,123,3006,91,148,154,176,191	0,305,2060,4073,11784,12696,18526,19353,23601	circRNA	VCL	uc009xrr.3	5,6,7,8,9,10,11,12,13	chr10:75802911-75830427|chr10:75854219-75855413
chr10:75856961-75860855	0	0	0	0	3	2	chr10	75856961	75860855	+	2	129.15	0.3744	circRNA	VCL	uc009xrr.3	15.16	chr10:75855613-75856961|chr10:75860855-75863577
chr10:75856961-75865111	0	0	0	0	1	2	chr10	75856961	75865111	+	4	129,150,109,303	0,3744,6616,7847	circRNA	VCL	uc009xrr.3	15,16,17,18	chr10:75855613-75856961|chr10:75865111-75866987
chr10:75897864-75898689	0	0	0	0	0	2	chr10	75897864	75898689	-	2	276.126	0.699	circRNA	AP3M1	uc001jwg.3	3.2	chr10:75896561-75897864|chr10:75898689-75910512
chr10:76153898-76158337	0	0	2	1	3	1	chr10	76153898	76158337	+	2	173.109	0.433	circRNA	ADK	NM_001202450	5.6	chr10:76074503-76153898|chr10:76158337-76349039
chr10:76349039-76360251	0	0	0	2	0	2	chr10	76349039	76360251	+	2	36.115	0.11097	circRNA	ADK	NM_001202450	7.8	chr10:76158337-76349039|chr10:76360251-76429940
chr10:76598440-76603236	1	3	6	5	1	1	chr10	76598440	76603236	+	2	70.879	0.3917	circRNA	KAT6B	NM_001256468	2.3	chr10:76586543-76598440|chr10:76603236-76719727
chr10:76602357-76603236	0	0	5	3	0	2	chr10	76602357	76603236	+	1	879	0	circRNA	KAT6B	ENST00000372725	2	chr10:76585432-76602357|chr10:76603236-76719727
chr10:76729417-76737195	3	0	0	0	0	0	chr10	76729417	76737195	+	5	116,82,133,56,122	0,360,2847,5739,7656	circRNA	KAT6B	ENST00000372725	4,5,6,7,8	chr10:76719836-76729417|chr10:76737195-76738981
chr10:76910271-76910864	0	0	1	3	3	3	chr10	76910271	76910864	+	1	593	0	circRNA	SAMD8	ENST00000447533	2	chr10:76859486-76910271|chr10:76910864-76924402
chr10:76978820-76979114	0	1	2	1	3	1	chr10	76978820	76979114	+	2	153.53	0.241	circRNA	VDAC2	ENST00000298468	5.6	chr10:76973828-76978820|chr10:76979114-76980500
chr10:77795765-77818541	2	3	1	2	1	2	chr10	77795765	77818541	+	3	127,140,118	0,11156,22658	circRNA	LRMDA	NM_001305581	3,4,5	chr10:77198252-77795765|chr10:77818541-78084158
chr10:7811178-7822270	0	1	0	2	1	2	chr10	7811178	7822270	-	6	130,61,49,182,123,44	0,5615,6535,9622,10840,11048	circRNA	KIN	ENST00000379562	8,7,6,5,4,3	chr10:7808066-7811178|chr10:7822270-7825043
chr10:7816793-7822270	0	0	0	0	2	0	chr10	7816793	7822270	-	5	61,49,182,123,44	0,920,4007,5225,5433	circRNA	KIN	ENST00000379562	7,6,5,4,3	chr10:7811308-7816793|chr10:7822270-7825043
chr10:7839009-7844817	24	46	68	157	95	87	chr10	7839009	7844817	+	6	132,205,144,65,156,97	0,1943,2725,2980,5223,5711	circRNA	ATP5C1	NM_001001973	3,4,5,6,7,8	chr10:7838118-7839009|chr10:7844817-7848936
chr10:79761954-79767624	0	2	3	2	0	1	chr10	79761954	79767624	-	3	112,173,165	0,2519,5505	circRNA	POLR3A	NM_007055	17,16,15	chr10:79760852-79761954|chr10:79767624-79769294
chr10:79764473-79770298	0	0	1	2	0	0	chr10	79764473	79770298	-	5	173,165,139,128,70	0,2986,4821,5148,5755	circRNA	POLR3A	NM_007055	16,15,14,13,12	chr10:79762066-79764473|chr10:79770298-79773407
chr10:80878671-80976031	0	3	0	1	0	0	chr10	80878671	80976031	+	6	110,96,81,109,114,106	0,20767,43138,82669,89421,97254	circRNA	ZMIZ1	ENST00000334512	2,3,4,5,6,7	chr10:80829027-80878671|chr10:80976031-81036937
chr10:80921809-80976031	0	2	0	0	0	0	chr10	80921809	80976031	+	4	81,109,114,106	0,39531,46283,54116	circRNA	ZMIZ1	ENST00000334512	4,5,6,7	chr10:80899534-80921809|chr10:80976031-81036937
chr10:80961340-80976031	0	6	2	2	3	1	chr10	80961340	80976031	+	3	109,114,106	0,6752,14585	circRNA	ZMIZ1	ENST00000334512	5,6,7	chr10:80921890-80961340|chr10:80976031-81036937
chr10:81070680-81070941	0	1	1	6	2	0	chr10	81070680	81070941	+	1	261	0	circRNA	ZMIZ1	ENST00000334512	24	chr10:81067328-81070680|chr10:81070941-81072398
chr10:81917396-81923899	0	2	0	0	0	0	chr10	81917396	81923899	-	7	123,59,96,94,57,80,91	0,326,1459,4294,5708,5893,6412	circRNA	ANXA11	ENST00000372231	14,13,12,11,10,9,8	chr10:81915668-81917396|chr10:81923899-81925839
chr10:82228302-82249070	0	1	2	3	0	3	chr10	82228302	82249070	+	2	141.98	0.2067	circRNA	TSPAN14	NM_001351266	2.3	chr10:82214127-82228302|chr10:82249070-82264483
chr10:82264534-82266960	2	2	3	0	4	5	chr10	82264534	82266960	+	1	2426	0	ciRNA	TSPAN14	ENST00000429989	3	chr10:82264534-82266983
chr10:82266983-82269227	1	2	0	0	2	0	chr10	82266983	82269227	+	2	147.171	0.2073	circRNA	TSPAN14	ENST00000429989	4.5	chr10:82264534-82266983|chr10:82269227-82271899
chr10:86130769-86133571	4	2	5	9	19	8	chr10	86130769	86133571	+	2	1456.2	0.2605	circRNA	CCSER2	NM_001284240	2.3	chr10:86088564-86130769|chr10:86133571-86177526
chr10:86177526-86185649	5	7	8	19	18	8	chr10	86177526	86185649	+	2	91.163	0.796	circRNA	CCSER2	NM_001284240	4.5	chr10:86133571-86177526|chr10:86185649-86198267
chr10:86177526-86237420	0	0	1	2	1	1	chr10	86177526	86237420	+	6	91,163,196,84,87,90	0,7960,20741,46162,52601,59804	circRNA	CCSER2	NM_001284240	4,5,6,7,8,9	chr10:86133571-86177526|chr10:86237420-86273204
chr10:86198267-86237420	1	7	0	8	13	4	chr10	86198267	86237420	+	4	196,84,87,90	0,25421,31860,39063	circRNA	CCSER2	NM_001284240	6,7,8,9	chr10:86185649-86198267|chr10:86237420-86273204
chr10:86223688-86237420	1	1	1	0	4	1	chr10	86223688	86237420	+	3	84,87,90	0,6439,13642	circRNA	CCSER2	NM_001284240	7,8,9	chr10:86198463-86223688|chr10:86237420-86273204
chr10:88203031-88206206	0	0	1	3	1	0	chr10	88203031	88206206	-	2	89.208	0.2967	circRNA	WAPAL	uc009xsv.3	9.8	chr10:88197772-88203031|chr10:88206206-88212976
chr10:88205998-88221044	1	3	0	0	2	1	chr10	88205998	88221044	-	6	208,116,176,77,98,112	0,6978,7414,12747,14157,14934	circRNA	WAPAL	uc009xsv.3	8,7,6,5,4,3	chr10:88203120-88205998|chr10:88221044-88227035
chr10:88211723-88221044	3	1	2	3	2	3	chr10	88211723	88221044	-	6	165,116,176,77,98,112	0,1253,1689,7022,8432,9209	circRNA	WAPAL	uc001kdn.3	16,15,14,13,12,11	chr10:88206206-88211723|chr10:88221044-88227035
chr10:88211723-88233730	0	0	0	0	2	0	chr10	88211723	88233730	-	11	165,116,176,77,98,112,228,112,137,153,96	0,1253,1689,7022,8432,9209,15312,19025,20241,20645,21911	circRNA	WAPAL	uc001kdn.3	16,15,14,13,12,11,10,9,8,7,6	chr10:88206206-88211723|chr10:88233730-88256957
chr10:88218745-88233730	0	0	2	0	2	0	chr10	88218745	88233730	-	8	77,98,112,228,112,137,153,96	0,1410,2187,8290,12003,13219,13623,14889	circRNA	WAPAL	uc001kdn.3	13,12,11,10,9,8,7,6	chr10:88213588-88218745|chr10:88233730-88256957
chr10:88220932-88277848	0	2	0	1	0	0	chr10	88220932	88277848	-	9	112,228,112,137,153,96,101,1026,521	0,6103,9816,11032,11436,12702,36025,38542,56395	circRNA	WAPAL	uc001kdn.3	11,10,9,8,7,6,5,4,3	chr10:88220253-88220932|chr10:88277848-88281121
chr10:88227035-88230860	0	0	1	0	2	0	chr10	88227035	88230860	-	2	228.112	0.3713	circRNA	WAPAL	uc001kdn.3	10.9	chr10:88221044-88227035|chr10:88230860-88231964
chr10:88227035-88233730	1	0	2	0	1	0	chr10	88227035	88233730	-	5	228,112,137,153,96	0,3713,4929,5333,6599	circRNA	WAPAL	uc001kdn.3	10,9,8,7,6	chr10:88221044-88227035|chr10:88233730-88256957
chr10:88230748-88233730	0	1	2	0	1	0	chr10	88230748	88233730	-	4	112,137,153,96	0,1216,1620,2886	circRNA	WAPAL	uc001kdn.3	9,8,7,6	chr10:88227263-88230748|chr10:88233730-88256957
chr10:88231964-88233730	0	0	0	0	2	0	chr10	88231964	88233730	-	3	137,153,96	0,404,1670	circRNA	WAPAL	uc001kdn.3	8,7,6	chr10:88230860-88231964|chr10:88233730-88256957
chr10:88256957-88260500	0	0	3	2	0	1	chr10	88256957	88260500	-	2	101.103	0.2517	circRNA	WAPAL	uc001kdn.3	5.4	chr10:88233730-88256957|chr10:88260500-88277327
chr10:88813098-88822592	0	0	3	0	0	0	chr10	88813098	88822592	-	7	63,92,124,81,138,138,180	0,4349,5808,6819,7346,7573,9314	circRNA	GLUD1	NM_001318900	12,11,10,9,8,7,6	chr10:88811627-88813098|chr10:88822592-88827819
chr10:88911106-88912636	0	1	3	1	2	6	chr10	88911106	88912636	+	1	1530	0	circRNA	FAM35A	NM_001330112	3	chr10:88856746-88911106|chr10:88912636-88917804
chr10:89005871-89096646	0	0	2	0	0	0	chr10	89005871	89096646	-	4	98,54,43,104	0,42327,80515,90671	circRNA	NUTM2A-AS1	ENST00000451940	5,4,3,2	chr10:88963693-89005871|chr10:89096646-89101998
chr10:89268092-89280926	2	3	7	2	4	1	chr10	89268092	89280926	+	3	198,98,134	0,4788,12700	circRNA	MINPP1	NM_004897	2,3,4	chr10:89265309-89268092|chr10:89280926-89311838
chr10:89527429-89536184	5	1	4	2	5	7	chr10	89527429	89536184	-	3	51,90,107	0,3279,8648	circRNA	ATAD1	ENST00000308448	8,7,6	chr10:89516679-89527429|chr10:89536184-89544226
chr10:909682-910210	0	4	0	6	6	4	chr10	909682	910210	-	2	141.148	0.38	circRNA	LARP4B	NM_001351277	5.4	chr10:890995-909682|chr10:910210-930386
chr10:909682-931700	1	6	8	2	3	5	chr10	909682	931700	-	4	141,148,60,120	0,380,20704,21898	circRNA	LARP4B	NM_001351277	5,4,3,2	chr10:890995-909682|chr10:931700-977367
chr10:91476192-91484915	0	0	1	0	0	2	chr10	91476192	91484915	+	7	112,72,147,163,288,140,139	0,988,1140,2274,2983,7528,8584	circRNA	KIF20B	NM_001284259	9,10,11,12,13,14,15	chr10:91474939-91476192|chr10:91484915-91486049
chr10:91478466-91486278	0	0	1	2	0	0	chr10	91478466	91486278	+	5	163,288,140,139,229	0,709,5254,6310,7583	circRNA	KIF20B	NM_001284259	12,13,14,15,16	chr10:91477479-91478466|chr10:91486278-91487612
chr10:91497143-91498853	0	0	0	2	0	0	chr10	91497143	91498853	+	2	1231.14	0.1571	circRNA	KIF20B	NM_001284259	20.21	chr10:91492813-91497143|chr10:91498853-91503564
chr10:91498714-91522592	1	1	2	5	1	1	chr10	91498714	91522592	+	9	139,120,61,126,125,156,177,111,198	0,4850,6941,12388,13609,15560,19748,21568,23680	circRNA	KIF20B	NM_001284259	21,22,23,24,25,26,27,28,29	chr10:91498374-91498714|chr10:91522592-91528046
chr10:91511102-91522592	9	28	31	63	43	36	chr10	91511102	91522592	+	6	126,125,156,177,111,198	0,1221,3172,7360,9180,11292	circRNA	KIF20B	NM_001284259	24,25,26,27,28,29	chr10:91505716-91511102|chr10:91522592-91528046
chr10:93000240-93011197	0	1	1	2	0	0	chr10	93000240	93011197	+	4	97,56,60,149	0,8021,8181,10808	circRNA	PCGF5	NM_001257101	3,4,5,6	chr10:92982740-93000240|chr10:93011197-93021082
chr10:930386-931700	2	1	2	0	0	0	chr10	930386	931700	-	2	60.12	0.1194	circRNA	LARP4B	NM_001351277	3.2	chr10:910210-930386|chr10:931700-977367
chr10:93185037-93221941	0	3	9	5	3	9	chr10	93185037	93221941	+	4	130,139,103,90	0,35146,35973,36814	circRNA	HECTD2	NM_001348365	2,3,4,5	chr10:93169178-93185037|chr10:93221941-93237957
chr10:93586773-93602148	0	1	0	2	0	1	chr10	93586773	93602148	+	9	187,122,92,79,172,80,146,166,220	0,1268,3906,4086,6836,9902,13544,14266,15155	circRNA	TNKS2	ENST00000371627	8,9,10,11,12,13,14,15,16	chr10:93582119-93586773|chr10:93602148-93604675
chr10:93590679-93596755	0	0	0	0	1	3	chr10	93590679	93596755	+	4	92,79,172,80	0,180,2930,5996	circRNA	TNKS2	ENST00000371627	10,11,12,13	chr10:93588163-93590679|chr10:93596755-93600317
chr10:93608139-93611093	1	1	2	2	0	0	chr10	93608139	93611093	+	3	253,83,121	0,1129,2833	circRNA	TNKS2	ENST00000371627	19,20,21	chr10:93605697-93608139|chr10:93611093-93614785
chr10:93699708-93702325	0	2	1	2	1	0	chr10	93699708	93702325	+	2	115.147	0.247	circRNA	BTAF1	ENST00000265990	3.4	chr10:93695537-93699708|chr10:93702325-93711159
chr10:93702178-93716414	0	0	0	2	1	0	chr10	93702178	93716414	+	4	147,164,137,130	0,8981,11315,14106	circRNA	BTAF1	ENST00000265990	4,5,6,7	chr10:93699823-93702178|chr10:93716414-93716981
chr10:93711159-93726514	0	1	2	1	6	0	chr10	93711159	93726514	+	10	164,137,130,69,90,96,177,141,125,121	0,2334,5125,5822,7662,8382,8575,11135,12674,15234	circRNA	BTAF1	ENST00000265990	5,6,7,8,9,10,11,12,13,14	chr10:93702325-93711159|chr10:93726514-93740210
chr10:93751875-93768032	0	2	1	2	1	0	chr10	93751875	93768032	+	6	191,154,110,202,149,153	0,1575,2416,4250,5484,16004	circRNA	BTAF1	ENST00000265990	21,22,23,24,25,26	chr10:93749337-93751875|chr10:93768032-93768585
chr10:93754291-93768032	1	7	8	8	7	7	chr10	93754291	93768032	+	4	110,202,149,153	0,1834,3068,13588	circRNA	BTAF1	ENST00000265990	23,24,25,26	chr10:93753604-93754291|chr10:93768032-93768585
chr10:93756125-93757508	1	0	0	2	1	2	chr10	93756125	93757508	+	2	202.149	0.1234	circRNA	BTAF1	ENST00000265990	24.25	chr10:93754401-93756125|chr10:93757508-93767879
chr10:93756125-93768032	0	1	4	3	3	0	chr10	93756125	93768032	+	3	202,149,153	0,1234,11754	circRNA	BTAF1	ENST00000265990	24,25,26	chr10:93754401-93756125|chr10:93768032-93768585
chr10:93767879-93768965	0	0	0	1	3	0	chr10	93767879	93768965	+	3	153,122,168	0,706,918	circRNA	BTAF1	ENST00000265990	26,27,28	chr10:93757508-93767879|chr10:93768965-93770829
chr10:93768585-93768965	1	0	0	1	1	4	chr10	93768585	93768965	+	2	122.168	0.212	circRNA	BTAF1	ENST00000265990	27.28	chr10:93768032-93768585|chr10:93768965-93770829
chr10:93841076-93851701	2	0	0	3	1	2	chr10	93841076	93851701	-	2	182.115	0.1051	circRNA	CPEB3	ENST00000412050	9.8	chr10:93812196-93841076|chr10:93851701-93870832
chr10:93902785-93904842	0	0	0	0	2	0	chr10	93902785	93904842	-	2	90.141	0.1916	circRNA	CPEB3	NM_014912	6.5	chr10:93870951-93902785|chr10:93904842-93940719
chr10:93902785-93904869	2	2	3	1	5	3	chr10	93902785	93904869	-	2	90.168	0.1916	circRNA	CPEB3	ENST00000412050	6.5	chr10:93870951-93902785|chr10:93904869-93940719
chr10:94239033-94250352	0	0	2	0	0	0	chr10	94239033	94250352	-	4	145,83,123,103	0,3978,7919,11216	circRNA	IDE	ENST00000371581	5,4,3,2	chr10:94235751-94239033|chr10:94250352-94257428
chr10:94243011-94267962	0	1	0	3	1	0	chr10	94243011	94267962	-	7	83,123,103,104,81,92,93	0,3941,7238,21539,23187,24320,24858	circRNA	IDE	NM_001322796	14,13,12,11,10,9,8	chr10:94239178-94243011|chr10:94267962-94268484
chr10:94291504-94297307	2	2	1	0	7	2	chr10	94291504	94297307	-	3	170,208,185	0,2830,5618	circRNA	IDE	NM_001322796	4,3,2	chr10:94274799-94291504|chr10:94297307-94332925
chr10:94366021-94376589	1	1	1	2	0	0	chr10	94366021	94376589	+	8	133,98,79,186,125,91,243,96	0,354,894,2755,3120,6775,7112,10472	circRNA	KIF11	NM_004523	2,3,4,5,6,7,8,9	chr10:94353209-94366021|chr10:94376589-94381141
chr10:94366021-94381230	0	0	1	2	2	0	chr10	94366021	94381230	+	9	133,98,79,186,125,91,243,96,89	0,354,894,2755,3120,6775,7112,10472,15120	circRNA	KIF11	NM_004523	2,3,4,5,6,7,8,9,10	chr10:94353209-94366021|chr10:94381230-94388564
chr10:94368776-94369266	0	0	0	0	2	0	chr10	94368776	94369266	+	2	186.125	0.365	circRNA	KIF11	NM_004523	5.6	chr10:94366994-94368776|chr10:94369266-94372796
chr10:94388564-94390121	0	0	2	1	1	0	chr10	94388564	94390121	+	2	88.189	0.1368	circRNA	KIF11	NM_004523	11.12	chr10:94381230-94388564|chr10:94390121-94392242
chr10:94396940-94399657	0	1	0	2	0	3	chr10	94396940	94399657	+	3	126,159,107	0,203,2610	circRNA	KIF11	NM_004523	15,16,17	chr10:94393552-94396940|chr10:94399657-94405119
chr10:94396940-94405399	0	0	2	0	2	2	chr10	94396940	94405399	+	4	126,159,107,280	0,203,2610,8179	circRNA	KIF11	NM_004523	15,16,17,18	chr10:94393552-94396940|chr10:94405399-94407968
chr10:94396940-94410274	0	0	0	2	0	0	chr10	94396940	94410274	+	7	126,159,107,280,223,152,117	0,203,2610,8179,11028,12651,13217	circRNA	KIF11	NM_004523	15,16,17,18,19,20,21	chr10:94393552-94396940|chr10:94410274-94413421
chr10:94407968-94410274	1	0	0	2	0	1	chr10	94407968	94410274	+	3	223,152,117	0,1623,2189	circRNA	KIF11	NM_004523	19,20,21	chr10:94405399-94407968|chr10:94410274-94413421
chr10:94653105-94654777	0	0	1	2	1	0	chr10	94653105	94654777	+	3	172,48,91	0,1445,1581	circRNA	EXOC6	NM_001013848	3,4,5	chr10:94594581-94653105|chr10:94654777-94659355
chr10:94653105-94659401	4	13	9	10	11	11	chr10	94653105	94659401	+	4	172,48,91,46	0,1445,1581,6250	circRNA	EXOC6	NM_001013848	3,4,5,6	chr10:94594581-94653105|chr10:94659401-94669183
chr10:94653105-94669388	2	1	1	0	3	5	chr10	94653105	94669388	+	5	172,48,91,46,205	0,1445,1581,6250,16078	circRNA	EXOC6	NM_001013848	3,4,5,6,7	chr10:94594581-94653105|chr10:94669388-94675514
chr10:94653105-94675670	0	0	0	0	0	3	chr10	94653105	94675670	+	6	172,48,91,46,205,156	0,1445,1581,6250,16078,22409	circRNA	EXOC6	NM_001013848	3,4,5,6,7,8	chr10:94594581-94653105|chr10:94675670-94679738
chr10:94653105-94679807	0	1	1	1	0	2	chr10	94653105	94679807	+	7	172,48,91,46,205,156,69	0,1445,1581,6250,16078,22409,26633	circRNA	EXOC6	NM_001013848	3,4,5,6,7,8,9	chr10:94594581-94653105|chr10:94679807-94688095
chr10:94688095-94714498	0	0	2	0	0	0	chr10	94688095	94714498	+	8	84,47,121,72,98,106,110,112	0,5805,5971,7475,12388,19935,23934,26291	circRNA	EXOC6	NM_001013848	10,11,12,13,14,15,16,17	chr10:94679807-94688095|chr10:94714498-94715336
chr10:94688095-94715471	0	2	0	1	0	0	chr10	94688095	94715471	+	9	84,47,121,72,98,106,110,112,135	0,5805,5971,7475,12388,19935,23934,26291,27241	circRNA	EXOC6	NM_001013848	10,11,12,13,14,15,16,17,18	chr10:94679807-94688095|chr10:94715471-94733809
chr10:94688095-94733989	0	0	0	1	3	0	chr10	94688095	94733989	+	10	84,47,121,72,98,106,110,112,135,180	0,5805,5971,7475,12388,19935,23934,26291,27241,45714	circRNA	EXOC6	NM_001013848	10,11,12,13,14,15,16,17,18,19	chr10:94679807-94688095|chr10:94733989-94757230
chr10:94733809-94757372	0	0	0	0	2	0	chr10	94733809	94757372	+	2	180.142	0.23421	circRNA	EXOC6	NM_001013848	19.2	chr10:94715471-94733809|chr10:94757372-94773950
chr10:95441236-95459863	0	2	0	0	0	0	chr10	95441236	95459863	-	10	119,43,114,46,85,84,77,46,96,77	0,2576,3766,5924,10529,11166,13381,16656,16821,18550	circRNA	FRA10AC1	ENST00000359204	11,10,9,8,7,6,5,4,3,2	chr10:95436448-95441236|chr10:95459863-95462131
chr10:96201652-96234540	1	5	3	7	4	4	chr10	96201652	96234540	+	2	124.116	0.32772	circRNA	TBC1D12	NM_015188	2.3	chr10:96163341-96201652|chr10:96234540-96253121
chr10:96234424-96271411	0	0	1	2	0	0	chr10	96234424	96271411	+	7	116,83,118,107,81,89,72	0,18697,22387,25553,32599,35423,36915	circRNA	TBC1D12	NM_015188	3,4,5,6,7,8,9	chr10:96201776-96234424|chr10:96271411-96281711
chr10:96336418-96348147	0	0	0	0	3	0	chr10	96336418	96348147	+	5	144,197,97,138,162	0,4664,6301,7326,11567	circRNA	HELLS	NM_001289067	10,11,12,13,14	chr10:96334493-96336418|chr10:96348147-96350169
chr10:96998324-97007123	0	0	0	0	0	3	chr10	96998324	97007123	-	2	118.152	0.8647	circRNA	PDLIM1	NM_020992	6.5	chr10:96997868-96998324|chr10:97007123-97023620
chr10:97681772-97687089	0	0	0	2	1	0	chr10	97681772	97687089	+	4	61,77,66,96	0,2298,2763,5221	circRNA	C10orf131	uc010qoo.2	4,5,6,7	chr10:97673194-97681772|chr10:97687089-97697747
chr10:98303832-98325183	2	5	4	8	6	6	chr10	98303832	98325183	-	7	131,95,167,132,78,161,123	0,3819,7169,8852,15583,17902,21228	circRNA	TM9SF3	ENST00000371142	9,8,7,6,5,4,3	chr10:98292947-98303832|chr10:98325183-98336390
chr10:98303832-98336586	0	8	3	4	5	6	chr10	98303832	98336586	-	8	131,95,167,132,78,161,123,196	0,3819,7169,8852,15583,17902,21228,32558	circRNA	TM9SF3	ENST00000371142	9,8,7,6,5,4,3,2	chr10:98292947-98303832|chr10:98336586-98346490
chr10:98307651-98325183	0	0	0	0	2	0	chr10	98307651	98325183	-	6	95,167,132,78,161,123	0,3350,5033,11764,14083,17409	circRNA	TM9SF3	ENST00000371142	8,7,6,5,4,3	chr10:98303963-98307651|chr10:98325183-98336390
chr10:98376395-98388250	0	1	0	0	1	2	chr10	98376395	98388250	-	5	73,206,66,198,96	0,3713,6833,10069,11759	circRNA	PIK3AP1	uc001kmo.3	6,5,4,3,2	chr10:98369624-98376395|chr10:98388250-98392644
chr10:98380108-98388250	0	0	0	1	2	1	chr10	98380108	98388250	-	4	206,66,198,96	0,3120,6356,8046	circRNA	PIK3AP1	uc001kmo.3	5,4,3,2	chr10:98376468-98380108|chr10:98388250-98392644
chr10:98383228-98405419	0	3	3	3	1	2	chr10	98383228	98405419	-	4	66,198,96,190	0,3236,4926,22001	circRNA	PIK3AP1	uc001kmp.3	10,9,8,7	chr10:98380314-98383228|chr10:98405419-98408415
chr10:98405229-98416691	0	0	3	0	0	1	chr10	98405229	98416691	-	6	190,197,133,143,145,137	0,3186,5775,6036,7225,11325	circRNA	PIK3AP1	uc001kmp.3	7,6,5,4,3,2	chr10:98388250-98405229|chr10:98416691-98429287
chr10:98411004-98416691	0	2	4	3	4	2	chr10	98411004	98416691	-	4	133,143,145,137	0,261,1450,5550	circRNA	PIK3AP1	uc001kmp.3	5,4,3,2	chr10:98408612-98411004|chr10:98416691-98429287
chr10:98667021-98711953	0	0	2	3	3	2	chr10	98667021	98711953	+	5	66,80,133,288,94	0,403,36848,41743,44838	circRNA	LCOR	ENST00000540664	3,4,5,6,7	chr10:98593236-98667021|chr10:98711953-98714709
chr10:98703869-98711953	2	2	6	4	3	6	chr10	98703869	98711953	+	3	133,288,94	0,4895,7990	circRNA	LCOR	ENST00000540664	5,6,7	chr10:98667504-98703869|chr10:98711953-98714709
chr10:98988903-99025882	0	2	0	0	0	0	chr10	98988903	99025882	-	10	79,111,99,192,66,87,227,210,81,266	0,617,6070,14821,17125,27171,30255,34273,35679,36713	circRNA	ARHGAP19-SLIT1	ENST00000453547	11,10,9,8,7,6,5,4,3,2	chr10:98924647-98988903|chr10:99025882-99052328
chr10:99006028-99023386	1	1	0	0	2	0	chr10	99006028	99023386	-	4	66,87,227,210	0,10046,13130,17148	circRNA	ARHGAP19-SLIT1	ENST00000453547	7,6,5,4	chr10:99003916-99006028|chr10:99023386-99024582
chr10:99016074-99024663	0	1	0	0	3	0	chr10	99016074	99024663	-	4	87,227,210,81	0,3084,7102,8508	circRNA	ARHGAP19-SLIT1	ENST00000453547	6,5,4,3	chr10:99006094-99016074|chr10:99024663-99025616
chr10:99196947-99197507	1	3	7	2	9	6	chr10	99196947	99197507	-	2	85.51	0.509	circRNA	EXOSC1	uc001kni.3	7.6	chr10:99196308-99196947|chr10:99197507-99198426
chr10:99220451-99227340	0	0	1	0	0	2	chr10	99220451	99227340	-	12	57,101,127,69,103,100,156,150,101,82,126,79	0,212,801,1133,1322,1888,3163,5110,5364,5809,6081,6810	circRNA	MMS19	uc009xvt.3	22,21,20,19,18,17,16,15,14,13,12,11	chr10:99219989-99220451|chr10:99227340-99229402
chr10:99225561-99238146	0	0	0	0	2	0	chr10	99225561	99238146	-	13	150,101,82,126,79,78,75,87,62,129,70,75,86	0,254,699,971,1700,3841,4324,4970,10878,11030,11542,12050,12499	circRNA	MMS19	uc009xvt.3	15,14,13,12,11,10,9,8,7,6,5,4,3	chr10:99223770-99225561|chr10:99238146-99240698
chr10:99236439-99238146	0	0	2	1	6	2	chr10	99236439	99238146	-	5	62,129,70,75,86	0,152,664,1172,1621	circRNA	MMS19	uc009xvt.3	7,6,5,4,3	chr10:99230618-99236439|chr10:99238146-99240698
chr10:99502850-99504672	0	7	2	3	4	1	chr10	99502850	99504672	+	2	71.187	0.1635	circRNA	ZFYVE27	uc001kok.2	3.4	chr10:99498406-99502850|chr10:99504672-99508025
chr10:99915849-99919037	0	2	0	0	0	0	chr10	99915849	99919037	+	3	55,111,64	0,1370,3124	circRNA	R3HCC1L	NM_001351010	2,3,4	chr10:99894463-99915849|chr10:99919037-99922639
chr10:99915849-99923154	0	5	6	5	12	4	chr10	99915849	99923154	+	3	55,93,105	0,6790,7200	circRNA	R3HCC1L	NM_001256619	2,3,4	chr10:99894463-99915849|chr10:99923154-99967857
chr10:99915849-99946320	0	2	1	0	0	1	chr10	99915849	99946320	+	4	55,93,105,97	0,6790,7200,30374	circRNA	R3HCC1L	NM_001351014	2,3,4,5	chr10:99894463-99915849|chr10:99946320-99967857
chr10:99915849-99969656	3	1	6	3	4	1	chr10	99915849	99969656	+	4	55,93,105,1799	0,6790,7200,52008	circRNA	R3HCC1L	NM_001256619	2,3,4,5	chr10:99894463-99915849|chr10:99969656-99971063
chr10:99922639-99969656	0	0	0	0	2	0	chr10	99922639	99969656	+	3	93,105,1799	0,410,45218	circRNA	R3HCC1L	NM_001256619	3,4,5	chr10:99915904-99922639|chr10:99969656-99971063
chr10:99946223-99969656	1	0	5	0	0	2	chr10	99946223	99969656	+	2	97.1799	0.21634	circRNA	R3HCC1L	NM_001256620	3.4	chr10:99923154-99946223|chr10:99969656-99991268
chr10:99967857-99969656	0	0	1	3	1	1	chr10	99967857	99969656	+	1	1799	0	circRNA	R3HCC1L	NM_001256619	5	chr10:99923154-99967857|chr10:99969656-99971063
chr10:99991268-99995921	0	0	0	2	0	0	chr10	99991268	99995921	+	4	176,71,96,141	0,2934,3913,4512	circRNA	R3HCC1L	NM_001256619	7,8,9,10	chr10:99971105-99991268|chr10:99995921-100003847
chr11:1000431-1003804	0	1	4	3	2	3	chr11	1000431	1003804	+	2	167.83	0.329	circRNA	AP2A2	NM_001242837	15.16	chr11:994245-1000431|chr11:1003804-1006527
chr11:101374754-101375529	0	2	2	3	5	10	chr11	101374754	101375529	-	1	775	0	circRNA	TRPC6	ENST00000344327	2	chr11:101362469-101374754|chr11:101375529-101454064
chr11:102233626-102239279	4	4	5	5	11	3	chr11	102233626	102239279	+	3	79,49,243	0,772,5410	circRNA	BIRC2	NM_001166	4,5,6	chr11:102221674-102233626|chr11:102239279-102248226
chr11:10540580-10555752	1	0	0	0	2	0	chr11	10540580	10555752	-	4	108,182,109,190	0,6158,11609,14982	circRNA	RNF141	ENST00000265981	5,4,3,2	chr11:10536613-10540580|chr11:10555752-10562668
chr11:107200643-107224462	0	0	0	0	0	2	chr11	107200643	107224462	-	5	102,81,156,117,213	0,4963,6640,19019,23606	circRNA	CWF19L2	ENST00000282251	17,16,15,14,13	chr11:107197779-107200643|chr11:107224462-107260799
chr11:107260799-107263621	2	2	1	5	2	4	chr11	107260799	107263621	-	2	138.117	0.2705	circRNA	CWF19L2	ENST00000282251	12.11	chr11:107224462-107260799|chr11:107263621-107286934
chr11:107260799-107289013	0	3	3	5	5	0	chr11	107260799	107289013	-	4	138,117,90,94	0,2705,26135,28120	circRNA	CWF19L2	ENST00000282251	12,11,10,9	chr11:107224462-107260799|chr11:107289013-107299524
chr11:107673726-107686691	1	3	2	0	2	1	chr11	107673726	107686691	-	6	155,53,157,160,128,176	0,1717,2358,3716,8666,12789	circRNA	SLC35F2	ENST00000525815	7,6,5,4,3,2	chr11:107663526-107673726|chr11:107686691-107729383
chr11:10777224-10785426	0	0	0	0	2	0	chr11	10777224	10785426	+	6	118,90,149,108,108,237	0,1071,4495,6269,7753,7965	circRNA	CTR9	ENST00000361367	4,5,6,7,8,9	chr11:10776744-10777224|chr11:10785426-10785658
chr11:107904527-107925682	0	1	3	0	2	0	chr11	107904527	107925682	+	6	110,100,177,142,146,81	0,12469,16089,18859,20846,21074	circRNA	CUL5	uc001pju.3	2,3,4,5,6,7	chr11:107880098-107904527|chr11:107925682-107940822
chr11:107916996-107923528	1	1	0	1	3	0	chr11	107916996	107923528	+	3	100,177,142	0,3620,6390	circRNA	CUL5	uc001pju.3	3,4,5	chr11:107904637-107916996|chr11:107923528-107925373
chr11:107916996-107925682	6	3	12	9	8	13	chr11	107916996	107925682	+	5	100,177,142,146,81	0,3620,6390,8377,8605	circRNA	CUL5	uc001pju.3	3,4,5,6,7	chr11:107904637-107916996|chr11:107925682-107940822
chr11:107940822-107969256	0	0	2	0	0	0	chr11	107940822	107969256	+	11	94,131,108,65,133,132,124,176,162,119,124	0,2236,3294,8080,18431,19396,24295,24716,25434,27540,28310	circRNA	CUL5	uc001pju.3	8,9,10,11,12,13,14,15,16,17,18	chr11:107925682-107940822|chr11:107969256-107974916
chr11:107965117-107966418	6	9	3	1	13	6	chr11	107965117	107966418	+	3	124,176,162	0,421,1139	circRNA	CUL5	uc001pju.3	14,15,16	chr11:107960350-107965117|chr11:107966418-107968362
chr11:108040470-108047817	0	1	1	1	4	2	chr11	108040470	108047817	-	5	109,116,1653,129,97	0,184,2455,6502,7250	circRNA	NPAT	NM_001321307	15,14,13,12,11	chr11:108032907-108040470|chr11:108047817-108055958
chr11:108042925-108044578	0	0	3	0	0	2	chr11	108042925	108044578	-	1	1653	0	circRNA	NPAT	NM_001321307	13	chr11:108040770-108042925|chr11:108044578-108046972
chr11:108042925-108047817	1	3	2	5	3	1	chr11	108042925	108047817	-	3	1653,129,97	0,4047,4795	circRNA	NPAT	NM_001321307	13,12,11	chr11:108040770-108042925|chr11:108047817-108055958
chr11:108046972-108047817	4	10	6	12	11	3	chr11	108046972	108047817	-	2	129.97	0.748	circRNA	NPAT	NM_001321307	12.11	chr11:108044578-108046972|chr11:108047817-108055958
chr11:108055958-108061227	1	1	2	2	5	1	chr11	108055958	108061227	-	6	88,92,88,82,225,41	0,171,1250,2866,3874,5228	circRNA	NPAT	NM_001321307	10,9,8,7,6,5	chr11:108047817-108055958|chr11:108061227-108062844
chr11:108057208-108061227	0	8	1	1	2	1	chr11	108057208	108061227	-	4	88,82,225,41	0,1616,2624,3978	circRNA	NPAT	NM_001321307	8,7,6,5	chr11:108056221-108057208|chr11:108061227-108062844
chr11:108098321-108100050	0	1	4	5	5	3	chr11	108098321	108100050	+	3	102,113,146	0,181,1583	circRNA	ATM	ENST00000527805	2,3,4	chr11:108093913-108098321|chr11:108100050-108106396
chr11:108098321-108106561	1	2	4	6	8	7	chr11	108098321	108106561	+	4	102,113,146,165	0,181,1583,8075	circRNA	ATM	ENST00000527805	2,3,4,5	chr11:108093913-108098321|chr11:108106561-108114679
chr11:108098321-108138069	0	4	1	2	5	5	chr11	108098321	108138069	+	16	102,113,146,165,166,239,164,170,372,195,96,226,126,126,90,172	0,181,1583,8075,16358,17193,19369,21338,23106,24242,25222,26219,28620,29886,31391,39576	circRNA	ATM	ENST00000527805	2,3,4,5,6,7,8,9,10,11,12,13,14,15,16,17	chr11:108093913-108098321|chr11:108138069-108139136
chr11:108129712-108138069	0	1	1	5	0	2	chr11	108129712	108138069	+	2	90.172	0.8185	circRNA	ATM	ENST00000527805	16.17	chr11:108128333-108129712|chr11:108138069-108139136
chr11:108137897-108138069	0	2	1	2	2	1	chr11	108137897	108138069	+	1	172	0	circRNA	ATM	ENST00000527805	17	chr11:108129802-108137897|chr11:108138069-108139136
chr11:108137897-108139336	0	1	0	2	0	5	chr11	108137897	108139336	+	2	172.2	0.1239	circRNA	ATM	ENST00000527805	17.18	chr11:108129802-108137897|chr11:108139336-108141790
chr11:108143258-108143579	0	2	0	0	0	0	chr11	108143258	108143579	+	2	76.131	0.19	circRNA	ATM	ENST00000527805	21.22	chr11:108142133-108143258|chr11:108143579-108150217
chr11:108186549-108206688	0	0	7	0	1	1	chr11	108186549	108206688	+	16	89,103,149,105,120,235,168,114,218,208,114,159,139,83,141,117	0,188,1550,4131,5478,9487,10235,11822,13198,14391,15621,16056,16939,18063,19146,20022	circRNA	ATM	ENST00000278616	41,42,43,44,45,46,47,48,49,50,51,52,53,54,55,56	chr11:108183225-108186549|chr11:108206688-108213948
chr11:108199747-108202764	0	1	0	2	3	1	chr11	108199747	108202764	+	4	218,208,114,159	0,1193,2423,2858	circRNA	ATM	ENST00000278616	49,50,51,52	chr11:108198485-108199747|chr11:108202764-108203488
chr11:108199747-108206688	0	2	1	0	0	1	chr11	108199747	108206688	+	8	218,208,114,159,139,83,141,117	0,1193,2423,2858,3741,4865,5948,6824	circRNA	ATM	ENST00000278616	49,50,51,52,53,54,55,56	chr11:108198485-108199747|chr11:108206688-108213948
chr11:108200940-108206688	0	1	2	3	0	1	chr11	108200940	108206688	+	7	208,114,159,139,83,141,117	0,1230,1665,2548,3672,4755,5631	circRNA	ATM	ENST00000278616	50,51,52,53,54,55,56	chr11:108199965-108200940|chr11:108206688-108213948
chr11:10821636-10825137	0	0	0	2	0	0	chr11	10821636	10825137	-	10	259,216,105,126,114,161,142,99,84,111	0,342,641,872,1571,1959,2204,2940,3121,3390	circRNA	EIF4G2	NM_001172705	18,17,16,15,14,13,12,11,10,9	chr11:10821303-10821636|chr11:10825137-10825445
chr11:108544193-108550287	0	1	2	1	0	1	chr11	108544193	108550287	+	5	61,131,159,121,190	0,2129,3618,4848,5904	circRNA	DDX10	ENST00000322536	2,3,4,5,6	chr11:108536066-108544193|chr11:108550287-108559662
chr11:108586605-108594189	0	0	0	2	0	3	chr11	108586605	108594189	+	3	88,89,466	0,3918,7118	circRNA	DDX10	ENST00000322536	11,12,13	chr11:108577564-108586605|chr11:108594189-108709172
chr11:110007387-110008139	0	7	18	22	24	33	chr11	110007387	110008139	+	1	752	0	circRNA	ZC3H12C	uc010rwc.2	2	chr11:109963949-110007387|chr11:110008139-110023643
chr11:110007387-110023783	2	0	3	0	2	3	chr11	110007387	110023783	+	2	752.14	0.16256	circRNA	ZC3H12C	uc010rwc.2	2.3	chr11:109963949-110007387|chr11:110023783-110029980
chr11:110007387-110030215	3	7	10	22	32	22	chr11	110007387	110030215	+	3	752,140,235	0,16256,22593	circRNA	ZC3H12C	uc010rwc.2	2,3,4	chr11:109963949-110007387|chr11:110030215-110033997
chr11:110007387-110034104	0	3	0	5	1	4	chr11	110007387	110034104	+	4	752,140,235,107	0,16256,22593,26610	circRNA	ZC3H12C	uc010rwc.2	2,3,4,5	chr11:109963949-110007387|chr11:110034104-110035065
chr11:110118427-110124834	0	3	0	2	5	3	chr11	110118427	110124834	-	2	131.164	0.6243	circRNA	RDX	ENST00000528498	10.9	chr11:110108377-110118427|chr11:110124834-110126013
chr11:110134684-110135599	0	1	4	5	4	5	chr11	110134684	110135599	-	2	275.96	0.819	circRNA	RDX	ENST00000528498	5.4	chr11:110128914-110134684|chr11:110135599-110143260
chr11:111625222-111626174	1	0	0	2	3	1	chr11	111625222	111626174	-	3	71,115,156	0,481,796	circRNA	PPP2R1B	ENST00000311129	8,7,6	chr11:111624301-111625222|chr11:111626174-111630527
chr11:111706887-111728460	1	0	0	2	3	2	chr11	111706887	111728460	-	8	130,148,151,155,123,106,88,136	0,1303,2084,4490,8436,17215,17484,21437	circRNA	ALG9	NM_001077691	13,12,11,10,9,8,7,6	chr11:111680497-111706887|chr11:111728460-111731269
chr11:111907996-111910121	0	1	1	4	2	3	chr11	111907996	111910121	+	2	188.154	0.1971	circRNA	DLAT	NM_001931	6.7	chr11:111904254-111907996|chr11:111910121-111914189
chr11:111948938-111951282	0	0	1	1	2	1	chr11	111948938	111951282	+	2	101.15	0.2194	circRNA	C11orf57	ENST00000420986	3.4	chr11:111946367-111948938|chr11:111951282-111952705
chr11:113711319-113725057	0	0	0	1	2	1	chr11	113711319	113725057	-	4	160,106,133,78	0,1065,11903,13660	circRNA	USP28	ENST00000003302	5,4,3,2	chr11:113705057-113711319|chr11:113725057-113746166
chr11:113933932-113935290	6	18	15	10	30	20	chr11	113933932	113935290	+	1	1358	0	circRNA	ZBTB16	ENST00000335953	2	chr11:113930604-113933932|chr11:113935290-114027058
chr11:113933932-114027156	0	3	3	0	1	3	chr11	113933932	114027156	+	2	1358.98	0.93126	circRNA	ZBTB16	ENST00000335953	2.3	chr11:113930604-113933932|chr11:114027156-114057673
chr11:113933932-114057760	2	2	2	2	5	1	chr11	113933932	114057760	+	3	1358,98,87	0,93126,123741	circRNA	ZBTB16	ENST00000335953	2,3,4	chr11:113930604-113933932|chr11:114057760-114112888
chr11:116627861-116629123	0	1	4	3	2	3	chr11	116627861	116629123	-	3	82,185,139	0,620,1123	circRNA	BUD13	ENST00000375445	9,8,7	chr11:116619291-116627861|chr11:116629123-116629789
chr11:116734383-116744352	1	1	0	2	2	1	chr11	116734383	116744352	-	3	151,71,156	0,6663,9813	circRNA	SIK3	uc001ppy.3	15,14,13	chr11:116733043-116734383|chr11:116744352-116744618
chr11:117023156-117031977	0	1	1	1	2	2	chr11	117023156	117031977	+	3	88,90,117	0,7493,8704	circRNA	PAFAH1B2	ENST00000527958	2,3,4	chr11:117015134-117023156|chr11:117031977-117034485
chr11:117023156-117034608	5	15	12	16	9	10	chr11	117023156	117034608	+	4	88,90,117,123	0,7493,8704,11329	circRNA	PAFAH1B2	ENST00000527958	2,3,4,5	chr11:117015134-117023156|chr11:117034608-117038136
chr11:117030649-117034608	1	1	3	7	2	1	chr11	117030649	117034608	+	3	90,117,123	0,1211,3836	circRNA	PAFAH1B2	ENST00000527958	3,4,5	chr11:117023244-117030649|chr11:117034608-117038136
chr11:117109316-117110576	0	0	3	1	1	1	chr11	117109316	117110576	+	2	511.6	0.12	circRNA	RNF214	NM_207343	3.4	chr11:117105095-117109316|chr11:117110576-117115160
chr11:117115160-117117664	1	1	0	2	4	1	chr11	117115160	117117664	+	2	141.14	0.2364	circRNA	RNF214	NM_207343	5.6	chr11:117110576-117115160|chr11:117117664-117150623
chr11:117150623-117150975	1	6	1	2	4	2	chr11	117150623	117150975	+	2	97.89	0.263	circRNA	RNF214	NM_207343	7.8	chr11:117117664-117150623|chr11:117150975-117152029
chr11:118081201-118085601	0	2	0	0	0	0	chr11	118081201	118085601	-	3	226,155,63	0,1920,4337	circRNA	AMICA1	uc001psk.2	4,3,2	chr11:118076706-118081201|chr11:118085601-118095655
chr11:118352429-118353210	0	0	0	2	2	0	chr11	118352429	118353210	+	2	378.74	0.707	circRNA	KMT2A	ENST00000534358	7.8	chr11:118350953-118352429|chr11:118353210-118354897
chr11:118360506-118363945	0	0	1	1	4	0	chr11	118360506	118363945	+	5	96,121,123,185,174	0,337,1404,1952,3265	circRNA	KMT2A	ENST00000534358	12,13,14,15,16	chr11:118359475-118360506|chr11:118363945-118365002
chr11:118422500-118430579	0	6	3	6	2	3	chr11	118422500	118430579	-	7	67,122,129,94,75,140,80	0,428,2673,3204,3462,5120,7999	circRNA	IFT46	ENST00000264021	9,8,7,6,5,4,3	chr11:118416568-118422500|chr11:118430579-118435679
chr11:118425173-118430579	1	0	1	3	0	3	chr11	118425173	118430579	-	5	129,94,75,140,80	0,531,789,2447,5326	circRNA	IFT46	ENST00000264021	7,6,5,4,3	chr11:118423050-118425173|chr11:118430579-118435679
chr11:118427620-118430579	0	1	0	0	3	0	chr11	118427620	118430579	-	2	140.8	0.2879	circRNA	IFT46	ENST00000264021	4.3	chr11:118426037-118427620|chr11:118430579-118435679
chr11:118451960-118455359	1	2	0	7	5	1	chr11	118451960	118455359	+	4	264,180,206,165	0,1933,2563,3234	circRNA	ARCN1	NM_001655	2,3,4,5	chr11:118443265-118451960|chr11:118455359-118461055
chr11:118451960-118464413	0	3	0	2	1	0	chr11	118451960	118464413	+	7	264,180,206,165,166,148,109	0,1933,2563,3234,9095,11463,12344	circRNA	ARCN1	NM_001655	2,3,4,5,6,7,8	chr11:118443265-118451960|chr11:118464413-118468421
chr11:118453893-118455359	0	2	0	2	3	5	chr11	118453893	118455359	+	3	180,206,165	0,630,1301	circRNA	ARCN1	NM_001142281	2,3,4	chr11:118443265-118453893|chr11:118455359-118461055
chr11:118454523-118455359	1	3	1	13	5	6	chr11	118454523	118455359	+	2	206.165	0.671	circRNA	ARCN1	NM_001142281	3.4	chr11:118454073-118454523|chr11:118455359-118461055
chr11:118625413-118627996	1	0	1	2	3	0	chr11	118625413	118627996	-	4	183,102,64,117	0,697,1555,2466	circRNA	DDX6	uc001pua.2	5,4,3,2	chr11:118622806-118625413|chr11:118627996-118629482
chr11:118650340-118657227	1	1	3	4	6	3	chr11	118650340	118657227	-	3	105,64,467	0,1489,6420	circRNA	DDX6	NM_001257191	4,3,2	chr11:118639060-118650340|chr11:118657227-118661563
chr11:118656760-118657227	2	8	7	12	5	7	chr11	118656760	118657227	-	1	467	0	circRNA	DDX6	NM_001257191	2	chr11:118651893-118656760|chr11:118657227-118661563
chr11:118888298-118888667	0	2	0	0	0	0	chr11	118888298	118888667	-	1	369	0	ciRNA	RPS25	NM_001028	2	chr11:118888255-118888667
chr11:118940943-118944661	1	0	3	0	0	0	chr11	118940943	118944661	+	4	164,248,202,152	0,1362,2964,3566	circRNA	VPS11	ENST00000531528	4,5,6,7	chr11:118940287-118940943|chr11:118944661-118947606
chr11:118997644-118997835	2	1	1	1	1	0	chr11	118997644	118997835	+	1	191	0	circRNA	HINFP	uc010rzb.2	2	chr11:118992349-118997644|chr11:118997835-119001434
chr11:119002244-119003929	0	1	1	4	2	2	chr11	119002244	119003929	+	6	112,153,78,121,139,125	0,295,961,1126,1329,1560	circRNA	HINFP	NM_001243259	4,5,6,7,8,9	chr11:119001664-119002244|chr11:119003929-119004731
chr11:11901723-11919240	0	0	0	2	1	1	chr11	11901723	11919240	+	4	204,114,139,97	0,4290,11791,17420	circRNA	USP47	uc001mjq.1	3,4,5,6	chr11:11895406-11901723|chr11:11919240-11924261
chr11:119142444-119145663	0	2	0	0	0	0	chr11	119142444	119145663	+	3	147,157,122	0,2133,3097	circRNA	CBL	ENST00000264033	3,4,5	chr11:119103405-119142444|chr11:119145663-119146706
chr11:119144577-119145663	0	2	0	2	2	1	chr11	119144577	119145663	+	2	157.122	0.964	circRNA	CBL	ENST00000264033	4.5	chr11:119142591-119144577|chr11:119145663-119146706
chr11:120276826-120278532	0	0	4	5	1	0	chr11	120276826	120278532	+	2	24.86	0.162	circRNA	ARHGEF12	uc021qrm.1	2.3	chr11:120207984-120276826|chr11:120278532-120291461
chr11:120276826-120280159	1	0	2	0	0	3	chr11	120276826	120280159	+	3	24,86,57	0,1620,3276	circRNA	ARHGEF12	NM_015313	2,3,4	chr11:120207984-120276826|chr11:120280159-120291461
chr11:120276826-120292561	0	0	0	0	2	0	chr11	120276826	120292561	+	4	24,86,99,50	0,1620,14635,15685	circRNA	ARHGEF12	uc021qrm.1	2,3,4,5	chr11:120207984-120276826|chr11:120292561-120295066
chr11:120276826-120302620	1	0	3	1	3	3	chr11	120276826	120302620	+	9	24,86,99,50,58,179,78,120,141	0,1620,14635,15685,18240,21951,23322,23594,25653	circRNA	ARHGEF12	uc021qrm.1	2,3,4,5,6,7,8,9,10	chr11:120207984-120276826|chr11:120302620-120308016
chr11:120291461-120348235	1	1	1	3	0	0	chr11	120291461	120348235	+	32	99,50,58,179,78,120,141,75,93,111,99,43,106,138,33,115,106,213,133,36,155,147,86,126,115,101,78,76,168,88,87,80	0,1050,3605,7316,8687,8959,11018,16555,19376,20954,21351,24669,25650,26195,27121,27481,28356,30759,36365,36968,37327,38421,39919,44484,46441,48535,52297,53807,54587,55908,56466,56694	circRNA	ARHGEF12	NM_001198665	4,5,6,7,8,9,10,11,12,13,14,15,16,17,18,19,20,21,22,23,24,25,26,27,28,29,30,31,32,33,34,35	chr11:120278532-120291461|chr11:120348235-120348864
chr11:120310837-120317794	0	0	0	0	2	2	chr11	120310837	120317794	+	6	93,111,99,43,106,138	0,1578,1975,5293,6274,6819	circRNA	ARHGEF12	uc021qrm.1	12,13,14,15,16,17	chr11:120308091-120310837|chr11:120317794-120318582
chr11:120328429-120343836	0	1	1	1	2	1	chr11	120328429	120343836	+	8	36,155,147,86,126,115,101,78	0,359,1453,2951,7516,9473,11567,15329	circRNA	ARHGEF12	NM_001198665	23,24,25,26,27,28,29,30	chr11:120327959-120328429|chr11:120343836-120345268
chr11:120339996-120348235	1	1	5	4	2	1	chr11	120339996	120348235	+	7	101,78,76,168,88,87,80	0,3762,5272,6052,7373,7931,8159	circRNA	ARHGEF12	NM_001198665	29,30,31,32,33,34,35	chr11:120338017-120339996|chr11:120348235-120348864
chr11:120343758-120348235	3	7	12	19	28	15	chr11	120343758	120348235	+	6	78,76,168,88,87,80	0,1510,2290,3611,4169,4397	circRNA	ARHGEF12	NM_001198665	30,31,32,33,34,35	chr11:120340097-120343758|chr11:120348235-120348864
chr11:120345268-120348235	4	17	12	16	27	17	chr11	120345268	120348235	+	5	76,168,88,87,80	0,780,2101,2659,2887	circRNA	ARHGEF12	NM_001198665	31,32,33,34,35	chr11:120343836-120345268|chr11:120348235-120348864
chr11:120346048-120348235	0	2	0	4	3	4	chr11	120346048	120348235	+	4	168,88,87,80	0,1321,1879,2107	circRNA	ARHGEF12	NM_001198665	32,33,34,35	chr11:120345344-120346048|chr11:120348235-120348864
chr11:120347369-120348235	1	5	2	3	8	1	chr11	120347369	120348235	+	3	88,87,80	0,558,786	circRNA	ARHGEF12	NM_001198665	33,34,35	chr11:120346216-120347369|chr11:120348235-120348864
chr11:120769240-120776202	0	0	0	2	0	0	chr11	120769240	120776202	+	2	108.204	0.6758	circRNA	GRIK4	NM_014619	12.13	chr11:120745952-120769240|chr11:120776202-120811055
chr11:120906441-120930794	0	1	1	3	5	2	chr11	120906441	120930794	+	6	212,108,150,140,127,117	0,772,9941,11795,22612,24236	circRNA	TBCEL	uc001pxq.3	2,3,4,5,6,7	chr11:120895000-120906441|chr11:120930794-120957486
chr11:120907213-120930794	0	1	4	4	3	0	chr11	120907213	120930794	+	5	108,150,140,127,117	0,9169,11023,21840,23464	circRNA	TBCEL	uc001pxq.3	3,4,5,6,7	chr11:120906653-120907213|chr11:120930794-120957486
chr11:120916382-120918376	0	3	4	2	2	3	chr11	120916382	120918376	+	2	150.14	0.1854	circRNA	TBCEL	ENST00000529397	2.3	chr11:120894863-120916382|chr11:120918376-120924259
chr11:120916382-120924441	0	3	3	3	2	0	chr11	120916382	120924441	+	3	150,140,182	0,1854,7877	circRNA	TBCEL	ENST00000529397	2,3,4	chr11:120894863-120916382|chr11:120924441-120925760
chr11:120916382-120930794	6	13	14	19	25	13	chr11	120916382	120930794	+	6	150,140,182,257,127,117	0,1854,7877,9378,12671,14295	circRNA	TBCEL	ENST00000529397	2,3,4,5,6,7	chr11:120894863-120916382|chr11:120930794-120957486
chr11:120924338-120930794	0	1	1	0	3	2	chr11	120924338	120930794	+	4	103,257,127,117	0,1422,4715,6339	circRNA	TBCEL	ENST00000284259	4,5,6,7	chr11:120918376-120924338|chr11:120930794-120957486
chr11:121383711-121393698	0	2	0	0	0	0	chr11	121383711	121393698	+	5	102,170,193,118,74	0,1149,7654,9583,9913	circRNA	SORL1	ENST00000260197	7,8,9,10,11	chr11:121367758-121383711|chr11:121393698-121403172
chr11:122646926-122647918	3	4	7	12	12	13	chr11	122646926	122647918	+	2	54.187	0.805	circRNA	UBASH3B	ENST00000284273	2.3	chr11:122526918-122646926|chr11:122647918-122650204
chr11:122646926-122653930	0	0	0	1	2	1	chr11	122646926	122653930	+	4	54,187,199,170	0,805,3278,6834	circRNA	UBASH3B	ENST00000284273	2,3,4,5	chr11:122526918-122646926|chr11:122653930-122659807
chr11:122646926-122660016	0	0	0	0	1	4	chr11	122646926	122660016	+	5	54,187,199,170,209	0,805,3278,6834,12881	circRNA	UBASH3B	ENST00000284273	2,3,4,5,6	chr11:122526918-122646926|chr11:122660016-122665409
chr11:122646926-122672040	0	0	4	1	2	2	chr11	122646926	122672040	+	10	54,187,199,170,209,133,121,123,93,145	0,805,3278,6834,12881,18483,19937,20692,22723,24969	circRNA	UBASH3B	ENST00000284273	2,3,4,5,6,7,8,9,10,11	chr11:122526918-122646926|chr11:122672040-122677117
chr11:122665409-122669742	0	1	5	2	1	3	chr11	122665409	122669742	+	4	133,121,123,93	0,1454,2209,4240	circRNA	UBASH3B	ENST00000284273	7,8,9,10	chr11:122660016-122665409|chr11:122669742-122671895
chr11:122665409-122677224	0	0	0	0	2	0	chr11	122665409	122677224	+	6	133,121,123,93,145,107	0,1454,2209,4240,6486,11708	circRNA	UBASH3B	ENST00000284273	7,8,9,10,11,12	chr11:122660016-122665409|chr11:122677224-122678774
chr11:123988203-123989796	1	1	1	3	8	2	chr11	123988203	123989796	+	5	58,203,223,176,115	0,176,692,1036,1478	circRNA	VWA5A	ENST00000456829	3,4,5,6,7	chr11:123987387-123988203|chr11:123989796-123993666
chr11:124517260-124518071	0	1	1	9	4	1	chr11	124517260	124518071	-	2	134.11	0.701	circRNA	SIAE	ENST00000263593	7.6	chr11:124509763-124517260|chr11:124518071-124519514
chr11:124856637-124875108	1	1	0	3	0	0	chr11	124856637	124875108	+	7	147,1008,123,108,75,93,104	0,385,4719,5838,6427,17125,18367	circRNA	CCDC15	ENST00000529051	7,8,9,10,11,12,13	chr11:124847496-124856637|chr11:124875108-124908326
chr11:125513686-125526230	1	0	1	1	1	2	chr11	125513686	125526230	+	6	109,178,132,102,123,130	0,299,720,9954,11433,12414	circRNA	CHEK1	ENST00000524737	8,9,10,11,12,13	chr11:125507439-125513686|None
chr11:125765801-125766225	0	2	0	0	0	0	chr11	125765801	125766225	-	1	424	0	circRNA	PUS3	NM_031307	2	chr11:125765684-125765801|chr11:125766225-125773064
chr11:126142863-126143349	1	2	2	1	4	2	chr11	126142863	126143349	+	2	111.119	0.367	circRNA	FOXRED1	NM_017547	3.4	chr11:126141552-126142863|chr11:126143349-126144821
chr11:128628009-128638167	2	5	8	15	12	7	chr11	128628009	128638167	+	2	212.155	0.10003	circRNA	FLI1	ENST00000344954	2.3	chr11:128562695-128628009|chr11:128638167-128642676
chr11:128628009-128642880	6	16	20	39	47	39	chr11	128628009	128642880	+	3	212,155,204	0,10003,14667	circRNA	FLI1	ENST00000344954	2,3,4	chr11:128562695-128628009|chr11:128642880-128651852
chr11:128628009-128651918	14	28	42	84	87	77	chr11	128628009	128651918	+	2	212.66	0.23843	circRNA	FLI1	ENST00000525560	2.3	chr11:128556596-128628009|chr11:128651918-128675260
chr11:128638012-128642880	1	18	15	28	61	39	chr11	128638012	128642880	+	2	155.204	0.4664	circRNA	FLI1	ENST00000344954	3.4	chr11:128628221-128638012|chr11:128642880-128651852
chr11:128638012-128651918	8	23	32	77	95	75	chr11	128638012	128651918	+	3	155,204,66	0,4664,13840	circRNA	FLI1	ENST00000344954	3,4,5	chr11:128628221-128638012|chr11:128651918-128675260
chr11:128651852-128679099	0	0	1	0	2	0	chr11	128651852	128679099	+	4	66,66,60,48	0,23408,25222,27199	circRNA	FLI1	ENST00000525560	3,4,5,6	chr11:128628221-128651852|chr11:128679099-128680353
chr11:128910822-128936763	0	2	0	2	3	0	chr11	128910822	128936763	-	5	82,78,123,93,138	0,21352,22974,23913,25803	circRNA	ARHGAP32	ENST00000310343	10,9,8,7,6	chr11:128868363-128910822|chr11:128936763-128963515
chr11:128932174-128936763	3	3	6	8	4	4	chr11	128932174	128936763	-	4	78,123,93,138	0,1622,2561,4451	circRNA	ARHGAP32	ENST00000310343	9,8,7,6	chr11:128910904-128932174|chr11:128936763-128963515
chr11:128963515-128994789	1	2	5	6	5	5	chr11	128963515	128994789	-	3	87,85,92	0,29825,31182	circRNA	ARHGAP32	ENST00000310343	5,4,3	chr11:128936763-128963515|chr11:128994789-129034213
chr11:128963515-129034322	0	4	3	7	8	1	chr11	128963515	129034322	-	4	87,85,92,109	0,29825,31182,70698	circRNA	ARHGAP32	ENST00000310343	5,4,3,2	chr11:128936763-128963515|chr11:129034322-129061977
chr11:128993340-128994789	2	4	3	8	9	3	chr11	128993340	128994789	-	2	85.92	0.1357	circRNA	ARHGAP32	ENST00000310343	4.3	chr11:128963602-128993340|chr11:128994789-129034213
chr11:128993340-129034322	3	11	5	12	9	7	chr11	128993340	129034322	-	3	85,92,109	0,1357,40873	circRNA	ARHGAP32	ENST00000310343	4,3,2	chr11:128963602-128993340|chr11:129034322-129061977
chr11:129979323-129980556	2	5	3	2	2	2	chr11	129979323	129980556	+	2	174.124	0.1109	circRNA	APLP2	NM_001142276	2.3	chr11:129939977-129979323|chr11:129980556-129990600
chr11:130130750-130131824	9	31	34	29	37	44	chr11	130130750	130131824	-	1	1074	0	circRNA	ZBTB44	ENST00000445008	2	chr11:130109791-130130750|chr11:130131824-130184269
chr11:1307231-1311639	2	1	0	1	0	0	chr11	1307231	1311639	-	3	91,153,183	0,2622,4225	circRNA	TOLLIP	uc001ltd.3	5,4,3	chr11:1298483-1307231|chr11:1311639-1316874
chr11:1307231-1317024	3	6	3	11	12	11	chr11	1307231	1317024	-	4	91,153,183,150	0,2622,4225,9643	circRNA	TOLLIP	uc001ltd.3	5,4,3,2	chr11:1298483-1307231|chr11:1317024-1323813
chr11:13424714-13466728	0	0	2	0	0	1	chr11	13424714	13466728	-	7	111,198,121,103,286,197,158	0,2491,10362,13990,16292,18474,41856	circRNA	BTBD10	NM_032320	8,7,6,5,4,3,2	chr11:13410688-13424714|chr11:13466728-13484638
chr11:13435076-13443385	3	11	18	24	12	17	chr11	13435076	13443385	-	4	121,103,286,197	0,3628,5930,8112	circRNA	BTBD10	NM_001297742	5,4,3,2	chr11:13427403-13435076|chr11:13443385-13461430
chr11:13435076-13466728	2	5	6	7	8	11	chr11	13435076	13466728	-	5	121,103,286,197,158	0,3628,5930,8112,31494	circRNA	BTBD10	NM_032320	6,5,4,3,2	chr11:13427403-13435076|chr11:13466728-13484638
chr11:14316016-14317401	0	0	1	0	1	2	chr11	14316016	14317401	-	3	109,103,88	0,289,1297	circRNA	RRAS2	NM_001177315	4,3,2	chr11:14303266-14316016|chr11:14317401-14379783
chr11:14479329-14480233	0	2	0	4	7	5	chr11	14479329	14480233	-	2	100.156	0.748	circRNA	COPB1	ENST00000525214	4.3	chr11:14474851-14479329|chr11:14480233-14481753
chr11:14481753-14498561	0	0	3	1	1	1	chr11	14481753	14498561	-	9	90,146,120,145,180,228,121,161,97	0,978,4703,6074,8473,9128,14287,15577,16711	circRNA	COPB1	NM_016451	20,19,18,17,16,15,14,13,12	chr11:14480233-14481753|chr11:14498561-14501114
chr11:14486456-14520531	0	0	2	0	0	2	chr11	14486456	14520531	-	17	120,145,180,228,121,161,97,146,147,108,120,138,93,115,170,230,148	0,1371,3770,4425,9584,10874,12008,14658,15848,16079,18121,21456,23581,25654,28731,29299,33927	circRNA	COPB1	NM_016451	18,17,16,15,14,13,12,11,10,9,8,7,6,5,4,3,2	chr11:14482877-14486456|chr11:14520531-14521154
chr11:14532417-14535245	0	0	2	0	0	0	chr11	14532417	14535245	-	2	80.13	0.2698	circRNA	PSMA1	uc010rcp.1	7.6	chr11:14529312-14532417|chr11:14535245-14535935
chr11:14793482-14810788	0	6	5	0	2	1	chr11	14793482	14810788	+	3	51,249,137	0,14500,17169	circRNA	PDE3B	ENST00000282096	2,3,4	chr11:14666599-14793482|chr11:14810788-14825489
chr11:17143734-17167489	0	1	0	0	0	3	chr11	17143734	17167489	-	9	146,112,168,123,211,49,144,64,80	0,514,7112,9728,12631,12923,14294,23480,23675	circRNA	PIK3C2A	ENST00000265970	14,13,12,11,10,9,8,7,6	chr11:17141521-17143734|chr11:17167489-17169063
chr11:17153462-17167489	2	0	1	2	2	3	chr11	17153462	17167489	-	6	123,211,49,144,64,80	0,2903,3195,4566,13752,13947	circRNA	PIK3C2A	ENST00000265970	11,10,9,8,7,6	chr11:17151014-17153462|chr11:17167489-17169063
chr11:17316870-17317758	1	0	1	2	2	1	chr11	17316870	17317758	+	2	144.108	0.78	circRNA	NUCB2	uc001mms.1	9.1	chr11:17312912-17316870|chr11:17317758-17323290
chr11:17316870-17323417	1	0	1	2	2	1	chr11	17316870	17323417	+	3	144,108,127	0,780,6420	circRNA	NUCB2	uc001mms.1	9,10,11	chr11:17312912-17316870|chr11:17323417-17331118
chr11:17316870-17337022	1	0	0	2	0	3	chr11	17316870	17337022	+	9	144,108,127,104,186,91,59,93,90	0,780,6420,14248,15501,15869,16548,16704,20062	circRNA	NUCB2	ENST00000533773	7,8,9,10,11,12,13,14,15	chr11:17304490-17316870|chr11:17337022-17339130
chr11:17899754-18029623	1	0	3	1	3	1	chr11	17899754	18029623	-	9	37,159,63,114,79,61,95,156,136	0,110389,114723,117588,121286,122289,126233,128383,129733	circRNA	SERGEF	ENST00000527494	10,9,8,7,6,5,4,3,2	chr11:17809960-17899754|chr11:18029623-18034397
chr11:17981016-18029623	3	1	2	1	2	1	chr11	17981016	18029623	-	8	167,159,63,114,61,95,156,136	0,29127,33461,36326,41027,44971,47121,48471	circRNA	SERGEF	ENST00000525422	9,8,7,6,5,4,3,2	chr11:17940326-17981016|chr11:18029623-18034497
chr11:18010143-18029623	1	2	4	2	4	11	chr11	18010143	18029623	-	8	159,63,114,79,61,95,156,136	0,4334,7199,10897,11900,15844,17994,19344	circRNA	SERGEF	ENST00000527494	9,8,7,6,5,4,3,2	chr11:17899791-18010143|chr11:18029623-18034397
chr11:18022043-18031686	0	0	0	0	2	1	chr11	18022043	18031686	-	5	61,95,156,136,69	0,3944,6094,7444,9574	circRNA	SERGEF	ENST00000530613	6,5,4,3,2	chr11:18017456-18022043|chr11:18031686-18034397
chr11:18303496-18309560	0	0	0	0	0	2	chr11	18303496	18309560	-	6	271,107,114,120,156,121	0,1845,3396,4641,5585,5943	circRNA	HPS5	NM_007216	21,20,19,18,17,16	chr11:18301489-18303496|chr11:18309560-18312988
chr11:18305341-18307006	1	4	2	3	2	2	chr11	18305341	18307006	-	2	107.114	0.1551	circRNA	HPS5	NM_007216	20.19	chr11:18303767-18305341|chr11:18307006-18308137
chr11:18305341-18308257	0	2	0	2	1	4	chr11	18305341	18308257	-	3	107,114,120	0,1551,2796	circRNA	HPS5	NM_007216	20,19,18	chr11:18303767-18305341|chr11:18308257-18309081
chr11:18305341-18309560	0	0	0	2	0	0	chr11	18305341	18309560	-	5	107,114,120,156,121	0,1551,2796,3740,4098	circRNA	HPS5	NM_007216	20,19,18,17,16	chr11:18303767-18305341|chr11:18309560-18312988
chr11:18312988-18313566	2	2	2	1	3	9	chr11	18312988	18313566	-	1	578	0	circRNA	HPS5	NM_007216	15	chr11:18309560-18312988|chr11:18313566-18314445
chr11:18312988-18314523	14	35	30	27	34	25	chr11	18312988	18314523	-	2	578.78	0.1457	circRNA	HPS5	NM_007216	15.14	chr11:18309560-18312988|chr11:18314523-18316566
chr11:18316566-18319264	0	2	0	1	1	2	chr11	18316566	18319264	-	4	150,124,187,159	0,979,1778,2539	circRNA	HPS5	NM_007216	13,12,11,10	chr11:18314523-18316566|chr11:18319264-18320338
chr11:18422383-18425358	0	0	0	0	3	1	chr11	18422383	18425358	+	3	174,174,118	0,2003,2857	circRNA	LDHA	ENST00000422447	4,5,6	chr11:18421095-18422383|chr11:18425358-18426995
chr11:18536224-18541150	0	0	0	2	0	1	chr11	18536224	18541150	-	3	164,66,85	0,1421,4841	circRNA	TSG101	ENST00000536719	4,3,2	chr11:18531212-18536224|chr11:18541150-18548321
chr11:18566169-18588029	1	0	0	3	0	0	chr11	18566169	18588029	-	5	174,171,103,119,136	0,2257,13605,20269,21724	circRNA	UEVLD	ENST00000396197	9,8,7,6,5	chr11:18558016-18566169|chr11:18588029-18591760
chr11:18586438-18600355	0	0	1	0	2	0	chr11	18586438	18600355	-	5	119,136,164,66,85	0,1455,5322,10455,13832	circRNA	UEVLD	ENST00000396197	6,5,4,3,2	chr11:18579877-18586438|chr11:18600355-18610159
chr11:18592167-18600355	0	0	0	0	2	1	chr11	18592167	18600355	-	3	118,66,85	0,4726,8103	circRNA	UEVLD	ENST00000490736	5,4,3	chr11:18591924-18592167|chr11:18600355-18609223
chr11:20409564-20486092	0	0	0	0	2	0	chr11	20409564	20486092	+	12	136,83,50,103,160,145,66,122,100,79,188,87	0,1725,4192,4878,7784,9558,14900,19892,38747,64111,73961,76441	circRNA	PRMT3	ENST00000331079	2,3,4,5,6,7,8,9,10,11,12,13	chr11:20409320-20409564|chr11:20486092-20515464
chr11:20417348-20448411	0	0	0	2	0	1	chr11	20417348	20448411	+	5	160,145,66,122,100	0,1774,7116,12108,30963	circRNA	PRMT3	ENST00000331079	6,7,8,9,10	chr11:20414545-20417348|chr11:20448411-20473675
chr11:20424464-20448411	0	2	0	2	1	0	chr11	20424464	20448411	+	3	66,122,100	0,4992,23847	circRNA	PRMT3	ENST00000331079	8,9,10	chr11:20419267-20424464|chr11:20448411-20473675
chr11:22696395-22707335	0	0	0	0	3	0	chr11	22696395	22707335	+	2	165.122	0.10818	circRNA	GAS2	ENST00000528582	2.3	chr11:22647359-22696395|chr11:22707335-22747837
chr11:22856452-22859910	0	1	0	1	1	4	chr11	22856452	22859910	+	2	158.136	0.3322	circRNA	RP11-17A1.3	ENST00000525963	2.3	chr11:22851157-22856452|chr11:22859910-22898045
chr11:238997-244761	0	0	0	0	2	1	chr11	238997	244761	+	5	79,35,56,44,87	0,5043,5163,5428,5677	circRNA	PSMD13	ENST00000532097	2,3,4,5,6	chr11:237144-238997|chr11:244761-247276
chr11:28080472-28080708	2	0	2	0	2	0	chr11	28080472	28080708	-	1	236	0	circRNA	KIF18A	NM_031217	13	chr11:28058211-28080472|chr11:28080708-28083941
chr11:28080472-28106355	0	0	0	0	3	0	chr11	28080472	28106355	-	7	236,122,165,163,113,75,177	0,3469,10333,18081,23930,24243,25706	circRNA	KIF18A	NM_031217	13,12,11,10,9,8,7	chr11:28058211-28080472|chr11:28106355-28110070
chr11:28080472-28113060	0	0	2	2	0	0	chr11	28080472	28113060	-	10	236,122,165,163,113,75,177,198,111,105	0,3469,10333,18081,23930,24243,25706,29598,31691,32483	circRNA	KIF18A	NM_031217	13,12,11,10,9,8,7,6,5,4	chr11:28058211-28080472|chr11:28113060-28116189
chr11:28098553-28113060	0	0	2	0	1	1	chr11	28098553	28113060	-	7	163,113,75,177,198,111,105	0,5849,6162,7625,11517,13610,14402	circRNA	KIF18A	NM_031217	10,9,8,7,6,5,4	chr11:28090970-28098553|chr11:28113060-28116189
chr11:28232608-28311944	0	0	0	4	0	0	chr11	28232608	28311944	+	2	137.192	0.79144	circRNA	METTL15	ENST00000406787	4.5	chr11:28135151-28232608|chr11:28311944-28318343
chr11:28311752-28318478	0	1	0	0	1	3	chr11	28311752	28318478	+	2	192.135	0.6591	circRNA	METTL15	ENST00000406787	5.6	chr11:28232745-28311752|chr11:28318478-28351942
chr11:2972488-3000467	0	2	3	3	2	7	chr11	2972488	3000467	-	13	57,30,120,23,146,140,72,132,87,142,100,59,31	0,521,3268,4485,7140,8511,13421,18544,20189,20843,24765,27025,27948	circRNA	NAP1L4	NM_005969	14,13,12,11,10,9,8,7,6,5,4,3,2	chr11:2970494-2972488|chr11:3000467-3013483
chr11:2991032-2993473	0	0	2	2	2	3	chr11	2991032	2993473	-	3	132,87,142	0,1645,2299	circRNA	NAP1L4	NM_005969	7,6,5	chr11:2985981-2991032|chr11:2993473-2997253
chr11:2991032-3000467	2	4	5	4	9	8	chr11	2991032	3000467	-	6	132,87,142,100,59,31	0,1645,2299,6221,8481,9404	circRNA	NAP1L4	NM_005969	7,6,5,4,3,2	chr11:2985981-2991032|chr11:3000467-3013483
chr11:31477806-31491344	0	0	0	0	2	1	chr11	31477806	31491344	-	4	127,89,134,40	0,4366,6912,13498	circRNA	IMMP1L	ENST00000529749	5,4,3,2	None|chr11:31491344-31531065
chr11:31482172-31484852	0	0	2	0	0	0	chr11	31482172	31484852	-	2	89.134	0.2546	circRNA	IMMP1L	NM_001304274	3.2	chr11:31477933-31482172|chr11:31484852-31531065
chr11:32118689-32120074	0	1	0	2	2	0	chr11	32118689	32120074	+	2	194.179	0.1206	circRNA	RCN1	ENST00000530348	2.3	chr11:31834045-32118689|chr11:32120074-32122093
chr11:32610139-32611187	1	0	3	1	2	0	chr11	32610139	32611187	+	3	139,124,95	0,418,953	circRNA	EIF3M	uc001mtu.4	3,4,5	chr11:32608690-32610139|chr11:32611187-32615411
chr11:32611092-32617593	0	1	1	1	3	2	chr11	32611092	32617593	+	4	95,84,100,82	0,4319,5367,6419	circRNA	EIF3M	uc001mtu.4	5,6,7,8	chr11:32610681-32611092|chr11:32617593-32622234
chr11:32948702-32956981	2	8	4	9	13	6	chr11	32948702	32956981	+	3	113,162,3693	0,805,4586	circRNA	QSER1	ENST00000399302	2,3,4	chr11:32914880-32948702|chr11:32956981-32975402
chr11:33127112-33127610	0	1	1	3	2	2	chr11	33127112	33127610	-	3	127,35,67	0,316,431	circRNA	CSTF3	ENST00000323959	8,7,6	chr11:33124730-33127112|chr11:33127610-33129448
chr11:33163212-33163532	0	0	1	3	0	1	chr11	33163212	33163532	-	2	96.102	0.218	circRNA	CSTF3	ENST00000323959	3.2	chr11:33129964-33163212|chr11:33163532-33182844
chr11:33307958-33309057	15	61	102	116	133	99	chr11	33307958	33309057	+	1	1099	0	circRNA	HIPK3	ENST00000525975	2	chr11:33278298-33307958|chr11:33309057-33350055
chr11:33307958-33350179	0	1	0	3	1	1	chr11	33307958	33350179	+	2	1099.12	0.42097	circRNA	HIPK3	ENST00000525975	2.3	chr11:33278298-33307958|chr11:33350179-33358620
chr11:33886147-33903433	0	0	3	0	1	0	chr11	33886147	33903433	-	4	216,241,278,64	0,4744,5108,17222	circRNA	LMO2	ENST00000257818	5,4,3,2	chr11:33881121-33886147|chr11:33903433-33913341
chr11:34093272-34098189	7	16	13	32	38	17	chr11	34093272	34098189	+	4	63,87,239,83	0,175,4510,4834	circRNA	CAPRIN1	NM_203364	3,4,5,6	chr11:34074183-34093272|chr11:34098189-34101174
chr11:34093272-34101312	1	1	0	0	1	2	chr11	34093272	34101312	+	5	63,87,239,83,138	0,175,4510,4834,7902	circRNA	CAPRIN1	NM_203364	3,4,5,6,7	chr11:34074183-34093272|chr11:34101312-34104371
chr11:34097782-34098189	1	1	0	1	0	4	chr11	34097782	34098189	+	2	239.83	0.324	circRNA	CAPRIN1	NM_203364	5.6	chr11:34093534-34097782|chr11:34098189-34101174
chr11:34101174-34111003	0	3	5	0	0	4	chr11	34101174	34111003	+	6	138,53,87,156,109,62	0,3197,3327,6436,6677,9767	circRNA	CAPRIN1	NM_203364	7,8,9,10,11,12	chr11:34098189-34101174|chr11:34111003-34111725
chr11:34101174-34112225	0	0	0	0	3	0	chr11	34101174	34112225	+	8	138,53,87,156,109,62,111,150	0,3197,3327,6436,6677,9767,10551,10901	circRNA	CAPRIN1	NM_203364	7,8,9,10,11,12,13,14	chr11:34098189-34101174|chr11:34112225-34113452
chr11:34101174-34113603	0	2	0	2	1	1	chr11	34101174	34113603	+	9	138,53,87,156,109,62,111,150,151	0,3197,3327,6436,6677,9767,10551,10901,12278	circRNA	CAPRIN1	NM_203364	7,8,9,10,11,12,13,14,15	chr11:34098189-34101174|chr11:34113603-34118025
chr11:34104371-34111003	0	1	0	4	7	1	chr11	34104371	34111003	+	5	53,87,156,109,62	0,130,3239,3480,6570	circRNA	CAPRIN1	NM_203364	8,9,10,11,12	chr11:34101312-34104371|chr11:34111003-34111725
chr11:34107610-34107960	0	1	0	3	4	1	chr11	34107610	34107960	+	2	156.109	0.241	circRNA	CAPRIN1	NM_203364	10.11	chr11:34104588-34107610|chr11:34107960-34110941
chr11:34110941-34113603	0	2	2	1	2	1	chr11	34110941	34113603	+	4	62,111,150,151	0,784,1134,2511	circRNA	CAPRIN1	NM_203364	12,13,14,15	chr11:34107960-34110941|chr11:34113603-34118025
chr11:34111725-34112225	0	0	1	0	1	4	chr11	34111725	34112225	+	2	111.15	0.35	circRNA	CAPRIN1	NM_203364	13.14	chr11:34111003-34111725|chr11:34112225-34113452
chr11:34111725-34113603	2	4	2	3	2	9	chr11	34111725	34113603	+	3	111,150,151	0,350,1727	circRNA	CAPRIN1	NM_203364	13,14,15	chr11:34111003-34111725|chr11:34113603-34118025
chr11:34904222-34910416	0	3	3	1	3	2	chr11	34904222	34910416	-	4	141,168,136,118	0,661,5617,6076	circRNA	APIP	ENST00000532428	5,4,3,2	chr11:34896830-34904222|chr11:34910416-34912050
chr11:34904222-34916657	0	0	1	0	2	0	chr11	34904222	34916657	-	6	141,168,136,118,49,101	0,661,5617,6076,7828,12334	circRNA	APIP	uc010reo.1	8,7,6,5,4,3	chr11:34896830-34904222|chr11:34916657-34918307
chr11:34952950-34991833	1	0	2	1	0	0	chr11	34952950	34991833	+	6	81,101,200,99,175,148	0,16102,25980,29016,35236,38735	circRNA	PDHX	ENST00000448838	2,3,4,5,6,7	chr11:34938033-34952950|chr11:34991833-34999670
chr11:34952950-35006275	0	0	0	5	0	0	chr11	34952950	35006275	+	8	81,101,200,99,175,148,59,159	0,16102,25980,29016,35236,38735,46720,53166	circRNA	PDHX	ENST00000448838	2,3,4,5,6,7,8,9	chr11:34938033-34952950|chr11:35006275-35013861
chr11:34969052-34991833	0	0	0	0	1	3	chr11	34969052	34991833	+	5	101,200,99,175,148	0,9878,12914,19134,22633	circRNA	PDHX	ENST00000448838	3,4,5,6,7	chr11:34953031-34969052|chr11:34991833-34999670
chr11:34978930-34999729	1	4	3	8	4	7	chr11	34978930	34999729	+	5	200,99,175,148,59	0,3036,9256,12755,20740	circRNA	PDHX	ENST00000448838	4,5,6,7,8	chr11:34969153-34978930|chr11:34999729-35006116
chr11:34978930-35006275	0	1	2	2	3	1	chr11	34978930	35006275	+	6	200,99,175,148,59,159	0,3036,9256,12755,20740,27186	circRNA	PDHX	ENST00000448838	4,5,6,7,8,9	chr11:34969153-34978930|chr11:35006275-35013861
chr11:34978930-35013926	0	1	3	0	0	2	chr11	34978930	35013926	+	7	200,99,175,148,59,159,65	0,3036,9256,12755,20740,27186,34931	circRNA	PDHX	ENST00000448838	4,5,6,7,8,9,10	chr11:34969153-34978930|chr11:35013926-35016460
chr11:34991685-35006275	1	0	5	1	3	5	chr11	34991685	35006275	+	3	148,59,159	0,7985,14431	circRNA	PDHX	ENST00000448838	7,8,9	chr11:34988361-34991685|chr11:35006275-35013861
chr11:36248634-36248980	28	61	50	41	72	55	chr11	36248634	36248980	+	1	346	0	circRNA	LDLRAD3	ENST00000524419	5	chr11:36123581-36248634|chr11:36248980-36250709
chr11:36422546-36424928	0	0	0	1	1	4	chr11	36422546	36424928	+	2	289.81	0.2301	circRNA	PRR5L	NM_001160167	2.3	chr11:36317988-36422546|chr11:36424928-36440804
chr11:36422546-36459026	0	0	0	3	1	1	chr11	36422546	36459026	+	5	289,81,49,58,92	0,2301,18258,30856,36388	circRNA	PRR5L	NM_001160167	2,3,4,5,6	chr11:36317988-36422546|chr11:36459026-36467849
chr11:36422546-36472885	0	1	2	0	4	3	chr11	36422546	36472885	+	7	289,81,49,58,92,141,127	0,2301,18258,30856,36388,45303,50212	circRNA	PRR5L	NM_001160167	2,3,4,5,6,7,8	chr11:36317988-36422546|chr11:36472885-36483891
chr11:36631630-36657667	1	0	0	2	0	2	chr11	36631630	36657667	+	3	159,155,67	0,23203,25970	circRNA	C11orf74	NM_001276722	2,3,4	chr11:36616311-36631630|chr11:36657667-36669565
chr11:3712576-3714605	0	2	1	0	0	0	chr11	3712576	3714605	-	2	143.144	0.1885	circRNA	NUP98	uc001lyg.3	8.7	chr11:3707424-3712576|chr11:3714605-3716678
chr11:3712576-3716836	0	0	3	1	0	3	chr11	3712576	3716836	-	3	143,144,158	0,1885,4102	circRNA	NUP98	uc001lyg.3	8,7,6	chr11:3707424-3712576|chr11:3716836-3720311
chr11:3712576-3722069	0	0	1	0	0	2	chr11	3712576	3722069	-	5	143,144,158,267,230	0,1885,4102,7735,9263	circRNA	NUP98	uc001lyg.3	8,7,6,5,4	chr11:3707424-3712576|chr11:3722069-3724001
chr11:3716678-3722069	0	0	2	1	0	2	chr11	3716678	3722069	-	3	158,267,230	0,3633,5161	circRNA	NUP98	uc001lyg.3	6,5,4	chr11:3714605-3716678|chr11:3722069-3724001
chr11:3721839-3722069	3	0	0	0	0	0	chr11	3721839	3722069	-	1	230	0	circRNA	NUP98	uc001lyg.3	4	chr11:3720578-3721839|chr11:3722069-3724001
chr11:3723692-3727857	1	0	0	0	5	0	chr11	3723692	3727857	-	3	430,157,183	0,2737,3982	circRNA	NUP98	ENST00000324932	23,22,21	chr11:3722069-3723692|chr11:3727857-3733793
chr11:3726429-3774638	0	0	3	0	0	1	chr11	3726429	3774638	-	12	157,183,165,178,139,114,299,117,188,134,141,93	0,1245,7364,8618,14212,15512,17957,19903,26191,29991,39309,48116	circRNA	NUP98	ENST00000324932	22,21,20,19,18,17,16,15,14,13,12,11	chr11:3724122-3726429|chr11:3774638-3781768
chr11:3752620-3774638	2	8	7	8	6	16	chr11	3752620	3774638	-	4	188,134,141,93	0,3800,13118,21925	circRNA	NUP98	ENST00000324932	14,13,12,11	chr11:3746449-3752620|chr11:3774638-3781768
chr11:3756420-3774638	3	0	0	1	2	2	chr11	3756420	3774638	-	3	134,141,93	0,9318,18125	circRNA	NUP98	ENST00000324932	13,12,11	chr11:3752808-3756420|chr11:3774638-3781768
chr11:3789810-3794969	0	0	2	2	0	0	chr11	3789810	3794969	-	3	164,181,108	0,3167,5051	circRNA	NUP98	ENST00000324932	8,7,6	chr11:3784269-3789810|chr11:3794969-3797111
chr11:3789810-3797251	0	1	3	4	0	1	chr11	3789810	3797251	-	4	164,181,108,140	0,3167,5051,7301	circRNA	NUP98	ENST00000324932	8,7,6,5	chr11:3784269-3789810|chr11:3797251-3800102
chr11:3794861-3797251	1	4	3	4	3	5	chr11	3794861	3797251	-	2	108.14	0.225	circRNA	NUP98	ENST00000324932	6.5	chr11:3793158-3794861|chr11:3797251-3800102
chr11:4076755-4080626	0	0	1	2	5	3	chr11	4076755	4080626	+	2	112.116	0.3755	circRNA	STIM1	ENST00000300737	4.5	chr11:4045217-4076755|chr11:4080626-4091255
chr11:4076755-4091433	0	0	3	3	1	0	chr11	4076755	4091433	+	3	112,116,178	0,3755,14500	circRNA	STIM1	ENST00000300737	4,5,6	chr11:4045217-4076755|chr11:4091433-4095731
chr11:4076755-4095909	0	2	2	3	5	2	chr11	4076755	4095909	+	4	112,116,178,178	0,3755,14500,18976	circRNA	STIM1	ENST00000300737	4,5,6,7	chr11:4045217-4076755|chr11:4095909-4103413
chr11:4091255-4095909	1	0	1	2	1	4	chr11	4091255	4095909	+	2	178.178	0.4476	circRNA	STIM1	ENST00000300737	6.7	chr11:4080626-4091255|chr11:4095909-4103413
chr11:4095731-4107773	0	0	1	0	3	0	chr11	4095731	4107773	+	5	178,168,101,236,67	0,7682,8380,8761,11975	circRNA	STIM1	ENST00000300737	7,8,9,10,11	chr11:4091433-4095731|chr11:4107773-4112511
chr11:4123222-4133292	0	0	1	3	0	2	chr11	4123222	4133292	+	6	89,178,101,60,40,163	0,4053,5442,7651,9608,9907	circRNA	RRM1	NM_001033	2,3,4,5,6,7	chr11:4116261-4123222|chr11:4133292-4139549
chr11:43348056-43357544	2	0	0	3	1	3	chr11	43348056	43357544	+	7	105,90,182,94,57,77,137	0,1282,2205,3458,4001,8771,9351	circRNA	API5	NM_001142930	7,8,9,10,11,12,13	chr11:43345186-43348056|chr11:43357544-43363977
chr11:43349338-43357544	0	1	2	1	0	0	chr11	43349338	43357544	+	6	90,182,94,57,77,137	0,923,2176,2719,7489,8069	circRNA	API5	NM_001142930	8,9,10,11,12,13	chr11:43348161-43349338|chr11:43357544-43363977
chr11:43772460-43837941	0	0	2	0	0	0	chr11	43772460	43837941	+	5	47,76,108,65,45	0,3135,47409,64526,65436	circRNA	HSD17B12	ENST00000532864	4,5,6,7,8	chr11:43662584-43772460|chr11:43837941-43852525
chr11:43819869-43861614	0	7	0	3	5	2	chr11	43819869	43861614	+	6	108,65,45,35,82,66	0,17117,18027,32656,39997,41679	circRNA	HSD17B12	NM_016142	4,5,6,7,8,9	chr11:43775671-43819869|chr11:43861614-43876264
chr11:43836986-43861614	0	1	0	2	2	0	chr11	43836986	43861614	+	5	65,45,35,82,66	0,910,15539,22880,24562	circRNA	HSD17B12	NM_016142	5,6,7,8,9	chr11:43819977-43836986|chr11:43861614-43876264
chr11:43852525-43861614	1	5	0	0	4	3	chr11	43852525	43861614	+	3	35,82,66	0,7341,9023	circRNA	HSD17B12	NM_016142	7,8,9	chr11:43837941-43852525|chr11:43861614-43876264
chr11:44129232-44129798	0	0	0	0	2	0	chr11	44129232	44129798	+	1	566	0	circRNA	EXT2	uc010rfo.2	2	chr11:44097142-44129232|chr11:44129798-44130743
chr11:44129232-44135851	1	3	2	3	4	3	chr11	44129232	44135851	+	3	566,90,117	0,1511,6502	circRNA	EXT2	uc010rfo.2	2,3,4	chr11:44097142-44129232|chr11:44135851-44146338
chr11:44129232-44151688	0	0	4	6	5	5	chr11	44129232	44151688	+	6	566,90,117,196,140,94	0,1511,6502,17106,19133,22362	circRNA	EXT2	uc010rfo.2	2,3,4,5,6,7	chr11:44097142-44129232|chr11:44151688-44193160
chr11:44129232-44193292	1	0	5	4	2	1	chr11	44129232	44193292	+	7	566,90,117,196,140,94,132	0,1511,6502,17106,19133,22362,63928	circRNA	EXT2	uc010rfo.2	2,3,4,5,6,7,8	chr11:44097142-44129232|chr11:44193292-44219378
chr11:45883610-45893784	1	5	6	4	4	4	chr11	45883610	45893784	+	7	89,141,312,152,203,93,142	0,5552,7446,7993,8270,8782,10032	circRNA	CRY2	ENST00000417225	5,6,7,8,9,10,11	chr11:45882583-45883610|chr11:45893784-45902464
chr11:46098304-46113774	3	17	9	35	26	24	chr11	46098304	46113774	-	4	66,33,137,41	0,2380,7412,15429	circRNA	PHF21A	NM_001352028	6,5,4,3	chr11:46001517-46098304|chr11:46113774-46140292
chr11:46098304-46140351	0	0	0	0	2	1	chr11	46098304	46140351	-	5	66,33,137,41,59	0,2380,7412,15429,41988	circRNA	PHF21A	NM_001352028	6,5,4,3,2	chr11:46001517-46098304|chr11:46140351-46142296
chr11:46391043-46394651	0	0	0	2	0	0	chr11	46391043	46394651	+	10	57,69,72,117,72,96,83,61,114,141	0,447,1819,1993,2210,2581,2934,3123,3277,3467	circRNA	DGKZ	ENST00000343674	5,6,7,8,9,10,11,12,13,14	chr11:46389629-46391043|chr11:46394651-46395706
chr11:46400050-46400522	0	0	0	1	0	3	chr11	46400050	46400522	+	1	472	0	ciRNA	DGKZ	ENST00000343674	27	chr11:46400050-46400540
chr11:46455023-46456587	0	1	0	4	1	3	chr11	46455023	46456587	-	2	155.189	0.1375	circRNA	AMBRA1	uc010rgt.2	8.7	chr11:46439602-46455023|chr11:46456587-46465037
chr11:46515157-46529920	1	3	4	7	6	7	chr11	46515157	46529920	-	3	101,81,180	0,516,14583	circRNA	AMBRA1	uc010rgt.2	5,4,3	chr11:46465148-46515157|chr11:46529920-46534276
chr11:46515157-46534363	1	2	0	1	5	4	chr11	46515157	46534363	-	4	101,81,180,87	0,516,14583,19119	circRNA	AMBRA1	uc010rgt.2	5,4,3,2	chr11:46465148-46515157|chr11:46534363-46563494
chr11:46515157-46570050	0	3	1	0	0	1	chr11	46515157	46570050	-	11	101,81,180,87,1037,147,67,173,184,59,255	0,516,14583,19119,48337,49644,50367,51996,53505,54209,54638	circRNA	AMBRA1	NM_017749	12,11,10,9,8,7,6,5,4,3,2	chr11:46465148-46515157|chr11:46570050-46612674
chr11:46529740-46534363	1	1	3	1	1	3	chr11	46529740	46534363	-	2	180.87	0.4536	circRNA	AMBRA1	uc010rgt.2	3.2	chr11:46515754-46529740|chr11:46534363-46563494
chr11:46567153-46570050	0	0	0	0	0	2	chr11	46567153	46570050	-	4	173,184,59,255	0,1509,2213,2642	circRNA	AMBRA1	NM_017749	5,4,3,2	chr11:46565591-46567153|chr11:46570050-46612674
chr11:46776437-46782334	0	4	2	2	2	0	chr11	46776437	46782334	-	4	180,121,174,173	0,4035,4381,5724	circRNA	CKAP5	ENST00000529230	36,35,34,33	chr11:46775047-46776437|chr11:46782334-46783549
chr11:46776437-46810323	0	0	2	1	0	0	chr11	46776437	46810323	-	21	180,121,174,173,194,136,204,150,126,89,136,195,129,114,175,140,126,58,95,186,93	0,4035,4381,5724,7112,7739,8088,8593,10243,12687,15075,15900,21367,22551,23251,23572,25306,25540,28386,29600,33793	circRNA	CKAP5	ENST00000529230	36,35,34,33,32,31,30,29,28,27,26,25,24,23,22,21,20,19,18,17,16	chr11:46775047-46776437|chr11:46810323-46811625
chr11:46780472-46782334	0	0	2	0	3	0	chr11	46780472	46782334	-	3	121,174,173	0,346,1689	circRNA	CKAP5	ENST00000529230	35,34,33	chr11:46776617-46780472|chr11:46782334-46783549
chr11:46791512-46810323	2	0	3	1	3	0	chr11	46791512	46810323	-	11	136,195,129,114,175,140,126,58,95,186,93	0,825,6292,7476,8176,8497,10231,10465,13311,14525,18718	circRNA	CKAP5	ENST00000529230	26,25,24,23,22,21,20,19,18,17,16	chr11:46789213-46791512|chr11:46810323-46811625
chr11:46797804-46810323	0	2	2	0	5	1	chr11	46797804	46810323	-	9	129,114,175,140,126,58,95,186,93	0,1184,1884,2205,3939,4173,7019,8233,12426	circRNA	CKAP5	ENST00000529230	24,23,22,21,20,19,18,17,16	chr11:46792532-46797804|chr11:46810323-46811625
chr11:46801743-46812133	0	0	0	2	2	0	chr11	46801743	46812133	-	7	126,58,95,186,93,111,114	0,234,3080,4294,8487,9882,10276	circRNA	CKAP5	ENST00000529230	20,19,18,17,16,15,14	chr11:46800149-46801743|chr11:46812133-46817143
chr11:46804823-46810323	1	4	2	10	4	4	chr11	46804823	46810323	-	3	95,186,93	0,1214,5407	circRNA	CKAP5	ENST00000529230	18,17,16	chr11:46802035-46804823|chr11:46810323-46811625
chr11:46804823-46812133	0	0	3	3	0	1	chr11	46804823	46812133	-	5	95,186,93,111,114	0,1214,5407,6802,7196	circRNA	CKAP5	ENST00000529230	18,17,16,15,14	chr11:46802035-46804823|chr11:46812133-46817143
chr11:46817143-46831424	0	0	1	0	0	2	chr11	46817143	46831424	-	8	183,129,165,90,105,114,101,133	0,1218,2211,2489,5606,12437,13806,14148	circRNA	CKAP5	ENST00000529230	13,12,11,10,9,8,7,6	chr11:46812133-46817143|chr11:46831424-46832556
chr11:46817143-46842819	0	2	0	2	2	1	chr11	46817143	46842819	-	12	183,129,165,90,105,114,101,133,172,207,194,94	0,1218,2211,2489,5606,12437,13806,14148,15413,20605,22717,25582	circRNA	CKAP5	ENST00000529230	13,12,11,10,9,8,7,6,5,4,3,2	chr11:46812133-46817143|chr11:46842819-46867770
chr11:46822749-46842819	0	0	0	0	2	0	chr11	46822749	46842819	-	8	105,114,101,133,172,207,194,94	0,6831,8200,8542,9807,14999,17111,19976	circRNA	CKAP5	ENST00000529230	9,8,7,6,5,4,3,2	chr11:46819722-46822749|chr11:46842819-46867770
chr11:46829580-46831424	0	2	1	4	0	1	chr11	46829580	46831424	-	3	114,101,133	0,1369,1711	circRNA	CKAP5	ENST00000529230	8,7,6	chr11:46822854-46829580|chr11:46831424-46832556
chr11:46829580-46842819	1	3	1	3	8	4	chr11	46829580	46842819	-	7	114,101,133,172,207,194,94	0,1369,1711,2976,8168,10280,13145	circRNA	CKAP5	ENST00000529230	8,7,6,5,4,3,2	chr11:46822854-46829580|chr11:46842819-46867770
chr11:46837748-46842819	1	3	1	2	0	3	chr11	46837748	46842819	-	3	207,194,94	0,2112,4977	circRNA	CKAP5	ENST00000529230	4,3,2	chr11:46832728-46837748|chr11:46842819-46867770
chr11:47187818-47189802	0	2	2	2	1	1	chr11	47187818	47189802	-	5	119,94,127,135,129	0,238,492,1641,1855	circRNA	ARFGAP2	ENST00000426335	10,9,8,7,6	chr11:47187053-47187818|chr11:47189802-47192976
chr11:47317046-47317606	0	2	1	2	3	2	chr11	47317046	47317606	+	2	84.159	0.401	circRNA	MADD	ENST00000342922	21.22	chr11:47315534-47317046|chr11:47317606-47330141
chr11:47380394-47381591	2	4	2	1	2	1	chr11	47380394	47381591	-	2	163.188	0.1009	circRNA	SPI1	NM_001080547	4.3	chr11:47377097-47380394|chr11:47381591-47397183
chr11:47380394-47397280	7	13	2	16	4	8	chr11	47380394	47397280	-	3	163,188,97	0,1009,16789	circRNA	SPI1	NM_003120	4,3,2	chr11:47377097-47380394|chr11:47397280-47399859
chr11:47380394-47397283	2	4	0	3	2	1	chr11	47380394	47397283	-	3	163,188,100	0,1009,16789	circRNA	SPI1	NM_001080547	4,3,2	chr11:47377097-47380394|chr11:47397283-47399859
chr11:47444124-47444524	1	1	4	0	1	1	chr11	47444124	47444524	-	2	149.144	0.256	circRNA	PSMC3	ENST00000602866	8.7	chr11:47442278-47444124|chr11:47444524-47445596
chr11:47493742-47510576	0	1	1	2	4	0	chr11	47493742	47510576	-	12	167,144,186,114,129,76,162,80,135,49,83,188	0,897,3145,4655,5106,6686,10504,11262,12198,14559,14968,16646	circRNA	CELF1	NM_001330272	15,14,13,12,11,10,9,8,7,6,5,4	chr11:47493654-47493742|chr11:47510576-47521004
chr11:47504246-47510576	0	0	0	1	2	0	chr11	47504246	47510576	-	6	162,80,135,49,83,188	0,758,1694,4055,4464,6142	circRNA	CELF1	NM_001330272	9,8,7,6,5,4	chr11:47500504-47504246|chr11:47510576-47521004
chr11:47505940-47510576	1	2	0	4	1	3	chr11	47505940	47510576	-	4	135,49,83,188	0,2361,2770,4448	circRNA	CELF1	NM_001330272	7,6,5,4	chr11:47505084-47505940|chr11:47510576-47521004
chr11:47508301-47522484	0	0	0	0	2	0	chr11	47508301	47522484	-	5	49,83,188,152,72	0,409,2087,12703,14111	circRNA	CELF1	NM_001330272	6,5,4,3,2	chr11:47506075-47508301|chr11:47522484-47546075
chr11:47521004-47528449	0	3	2	0	0	0	chr11	47521004	47528449	-	3	152,72,40	0,1408,7405	circRNA	CELF1	ENST00000528538	4,3,2	chr11:47515995-47521004|chr11:47528449-47546075
chr11:47647225-47648679	0	3	0	0	1	0	chr11	47647225	47648679	-	2	68.48	0.1406	circRNA	MTCH2	NM_001317231	11.1	chr11:47644328-47647225|chr11:47648679-47650504
chr11:47647225-47653263	0	0	1	0	0	2	chr11	47647225	47653263	-	6	68,48,94,60,52,58	0,1406,3279,4881,5362,5980	circRNA	MTCH2	NM_001317231	11,10,9,8,7,6	chr11:47644328-47647225|chr11:47653263-47656223
chr11:47647225-47656286	0	0	1	2	0	0	chr11	47647225	47656286	-	7	68,48,94,60,52,58,63	0,1406,3279,4881,5362,5980,8998	circRNA	MTCH2	NM_001317231	11,10,9,8,7,6,5	chr11:47644328-47647225|chr11:47656286-47657096
chr11:47752925-47772842	0	0	3	0	1	0	chr11	47752925	47772842	-	8	188,134,105,125,211,339,121,148	0,1163,2651,5242,12579,14682,19542,19769	circRNA	FNBP4	NM_001318339	12,11,10,9,8,7,6,5	chr11:47746330-47752925|chr11:47772842-47774467
chr11:47767607-47772842	0	0	2	3	2	0	chr11	47767607	47772842	-	3	339,121,148	0,4860,5087	circRNA	FNBP4	NM_001318339	7,6,5	chr11:47765715-47767607|chr11:47772842-47774467
chr11:47772467-47772842	2	2	2	2	3	3	chr11	47772467	47772842	-	2	121.148	0.227	circRNA	FNBP4	NM_001318339	6.5	chr11:47767946-47772467|chr11:47772842-47774467
chr11:47772467-47776216	0	0	1	3	2	0	chr11	47772467	47776216	-	4	121,148,187,137	0,227,2000,3612	circRNA	FNBP4	NM_001318339	6,5,4,3	chr11:47767946-47772467|chr11:47776216-47786821
chr11:47774467-47776216	2	3	5	5	7	4	chr11	47774467	47776216	-	2	187.137	0.1612	circRNA	FNBP4	NM_001318339	4.3	chr11:47772842-47774467|chr11:47776216-47786821
chr11:47819330-47823482	0	0	2	1	0	0	chr11	47819330	47823482	-	5	106,97,95,96,120	0,199,389,589,4032	circRNA	NUP160	NM_015231	27,26,25,24,23	chr11:47814498-47819330|chr11:47823482-47824989
chr11:47837030-47841010	0	1	0	5	2	0	chr11	47837030	47841010	-	4	171,84,69,85	0,467,2577,3895	circRNA	NUP160	NM_015231	13,12,11,10	chr11:47834967-47837030|chr11:47841010-47843275
chr11:47857202-47859175	0	2	4	0	1	0	chr11	47857202	47859175	-	3	159,115,79	0,1236,1894	circRNA	NUP160	NM_015231	7,6,5	chr11:47843716-47857202|chr11:47859175-47861394
chr11:48164470-48168515	0	0	0	5	0	0	chr11	48164470	48168515	+	4	132,211,125,88	0,1756,2081,3957	circRNA	PTPRJ	NM_002843	12,13,14,15	chr11:48161328-48164470|chr11:48168515-48170998
chr11:57258696-57259335	2	11	12	7	5	4	chr11	57258696	57259335	-	3	139,36,147	0,367,492	circRNA	SLC43A1	NM_001198810	11,10,9	chr11:57256865-57258696|chr11:57259335-57261465
chr11:57460082-57463515	0	0	0	2	2	2	chr11	57460082	57463515	+	3	92,133,124	0,1172,3309	circRNA	ZDHHC5	ENST00000527985	6,7,8	chr11:57457909-57460082|chr11:57463515-57464232
chr11:57505307-57506511	0	0	0	0	2	0	chr11	57505307	57506511	+	4	191,77,107,66	0,518,828,1138	circRNA	TMX2	NM_001347893	3,4,5,6	chr11:57505140-57505307|chr11:57506511-57506581
chr11:58317258-58322413	0	0	0	2	0	0	chr11	58317258	58322413	-	5	82,174,168,291,100	0,187,1279,4069,5055	circRNA	LPXN	ENST00000530561	8,7,6,5,4	chr11:58295664-58317258|chr11:58322413-58331627
chr11:58377302-58378527	0	0	0	0	2	0	chr11	58377302	58378527	+	3	210,37,105	0,468,1120	circRNA	ZFP91	ENST00000316059	3,4,5	chr11:58352357-58377302|chr11:58378527-58379076
chr11:587258-601701	0	1	0	0	2	1	chr11	587258	601701	+	7	206,84,116,98,176,130,128	0,4125,5300,9664,10136,11114,14315	circRNA	PHRF1	NM_001286581	4,5,6,7,8,9,10	chr11:582081-587258|chr11:601701-605118
chr11:591383-598502	0	2	0	0	0	0	chr11	591383	598502	+	5	84,116,98,176,130	0,1175,5539,6011,6989	circRNA	PHRF1	NM_001286581	5,6,7,8,9	chr11:587464-591383|chr11:598502-601573
chr11:59426338-59426942	2	5	4	20	20	16	chr11	59426338	59426942	-	2	81.218	0.386	circRNA	PATL1	ENST00000300146	4.3	chr11:59425197-59426338|chr11:59426942-59434325
chr11:596922-598502	0	0	0	2	1	2	chr11	596922	598502	+	3	98,176,130	0,472,1450	circRNA	PHRF1	NM_001286581	7,8,9	chr11:592674-596922|chr11:598502-601573
chr11:60687157-60688460	1	5	2	3	2	3	chr11	60687157	60688460	+	2	245.103	0.12	circRNA	TMEM109	ENST00000227525	2.3	chr11:60681740-60687157|chr11:60688460-60689245
chr11:61094250-61097546	1	5	1	0	3	3	chr11	61094250	61097546	-	3	115,222,117	0,2584,3179	circRNA	DDB1	NM_001923	5,4,3	chr11:61093180-61094250|chr11:61097546-61099014
chr11:61096834-61097546	0	0	3	1	1	1	chr11	61096834	61097546	-	2	222.117	0.595	circRNA	DDB1	NM_001923	4.3	chr11:61094365-61096834|chr11:61097546-61099014
chr11:61102091-61113418	0	0	2	0	0	1	chr11	61102091	61113418	+	16	112,190,111,182,79,90,35,85,90,117,120,138,107,104,34,90	0,3321,4446,4634,6816,7203,7841,7954,8135,8722,9236,9516,10640,10842,11092,11237	circRNA	DAK	uc001nre.3	2,3,4,5,6,7,8,9,10,11,12,13,14,15,16,17	chr11:61100801-61102091|chr11:61113418-61113822
chr11:61133516-61135470	0	5	20	10	16	18	chr11	61133516	61135470	+	2	172.76	0.1878	circRNA	TMEM138	NM_001330281	3.4	chr11:61131787-61133516|chr11:61135470-61136068
chr11:61178409-61179409	0	0	0	0	1	3	chr11	61178409	61179409	-	2	168.169	0.831	circRNA	CPSF7	NM_024811	9.8	chr11:61172176-61178409|chr11:61179409-61183137
chr11:61205096-61205585	1	7	12	18	16	11	chr11	61205096	61205585	+	2	224.11	0.379	circRNA	RP11-286N22.8	ENST00000544025	2.3	chr11:61196822-61205096|chr11:61205585-61249253
chr11:61205096-61213703	0	0	3	0	1	2	chr11	61205096	61213703	+	3	224,110,291	0,379,8316	circRNA	RP11-286N22.8	ENST00000543044	2,3,4	chr11:61197654-61205096|chr11:61213703-61249253
chr11:61574135-61578547	0	1	2	12	3	4	chr11	61574135	61578547	-	3	61,129,102	0,4087,4310	circRNA	FADS1	uc001nsh.3	5,4,3	chr11:61572233-61574135|chr11:61578547-61579942
chr11:61605249-61608197	0	3	0	2	4	2	chr11	61605249	61608197	+	3	111,198,102	0,2556,2846	circRNA	FADS2	NM_001281501	2,3,4	chr11:61583898-61605249|chr11:61608197-61615630
chr11:61605249-61615756	1	1	3	3	3	0	chr11	61605249	61615756	+	4	111,198,102,126	0,2556,2846,10381	circRNA	FADS2	NM_001281501	2,3,4,5	chr11:61583898-61605249|chr11:61615756-61624482
chr11:61630443-61631258	0	1	1	0	5	2	chr11	61630443	61631258	+	3	98,97,80	0,310,735	circRNA	FADS2	NM_001281501	8,9,10	chr11:61625002-61630443|chr11:61631258-61632623
chr11:62303416-62304039	0	3	0	0	0	0	chr11	62303416	62304039	-	2	154.99	0.524	circRNA	AHNAK	NM_024060	3.2	chr11:62302662-62303416|chr11:62304039-62314131
chr11:62334277-62335000	0	1	0	0	2	0	chr11	62334277	62335000	-	2	205.13	0.593	circRNA	EEF1G	ENST00000329251	7.6	chr11:62327926-62334277|chr11:62335000-62338436
chr11:62406454-62407203	5	13	10	13	13	15	chr11	62406454	62407203	-	3	128,109,105	0,376,644	circRNA	GANAB	NM_001329222	4,3,2	chr11:62402472-62406454|chr11:62407203-62407401
chr11:62487494-62491462	0	0	0	3	0	0	chr11	62487494	62491462	-	8	169,129,123,264,113,91,140,77	0,1272,1797,2094,2578,2790,3564,3891	circRNA	HNRNPUL2-BSCL2	NR_037946	10,9,8,7,6,5,4,3	chr11:62484661-62487494|chr11:62491462-62491762
chr11:62491058-62491898	2	3	0	1	0	0	chr11	62491058	62491898	-	3	140,77,136	0,327,704	circRNA	HNRNPUL2-BSCL2	NR_037946	4,3,2	chr11:62490375-62491058|chr11:62491898-62494090
chr11:62549365-62550297	0	2	2	1	2	3	chr11	62549365	62550297	+	3	75,221,133	0,219,799	circRNA	TAF6L	NM_006473	7,8,9	chr11:62546435-62549365|chr11:62550297-62553731
chr11:62638216-62639141	0	0	1	1	0	3	chr11	62638216	62639141	+	2	93.93	0.832	circRNA	SLC3A2	NM_002394	2.3	chr11:62623853-62638216|chr11:62639141-62648490
chr11:62649364-62655690	0	1	0	0	5	0	chr11	62649364	62655690	+	7	174,92,69,59,181,144,84	0,1015,2564,2739,3284,3572,6242	circRNA	SLC3A2	NM_001012662	5,6,7,8,9,10,11	chr11:62648919-62649364|chr11:62655690-62655802
chr11:62650379-62653080	1	6	4	5	1	0	chr11	62650379	62653080	+	5	92,69,59,181,144	0,1549,1724,2269,2557	circRNA	SLC3A2	NM_001012662	6,7,8,9,10	chr11:62649538-62650379|chr11:62653080-62655606
chr11:63426232-63426724	1	0	2	3	4	5	chr11	63426232	63426724	-	2	144.215	0.277	circRNA	ATL3	NM_015459	3.2	chr11:63420047-63426232|chr11:63426724-63438761
chr11:63517462-63517670	0	0	3	2	0	2	chr11	63517462	63517670	+	1	208	0	circRNA	RTN3	ENST00000341307	2	chr11:63449250-63517462|chr11:63517670-63519978
chr11:63519978-63521180	2	0	0	0	0	0	chr11	63519978	63521180	+	3	139,70,47	0,562,1155	circRNA	RTN3	ENST00000341307	3,4,5	chr11:63517670-63519978|chr11:63521180-63525627
chr11:63662630-63663105	0	3	0	0	2	1	chr11	63662630	63663105	+	2	180.54	0.421	circRNA	MARK2	ENST00000315032	2.3	chr11:63607032-63662630|chr11:63663105-63665703
chr11:63918710-63919865	0	2	0	1	3	0	chr11	63918710	63919865	-	2	117.102	0.1053	circRNA	MACROD1	ENST00000255681	3.2	chr11:63782753-63918710|chr11:63919865-63933168
chr11:63961660-63965446	0	1	3	0	3	2	chr11	63961660	63965446	+	6	142,142,169,127,103,121	0,290,1456,3082,3304,3665	circRNA	STIP1	ENST00000358794	3,4,5,6,7,8	chr11:63960759-63961660|chr11:63965446-63967411
chr11:65161043-65161896	0	2	0	3	1	0	chr11	65161043	65161896	+	3	102,59,167	0,468,686	circRNA	FRMD8	NM_001300832	3,4,5	chr11:65154592-65161043|chr11:65161896-65164269
chr11:65661484-65664477	0	0	2	4	3	1	chr11	65661484	65664477	-	2	103.198	0.2795	circRNA	FOSL1	NM_001300855	3.2	chr11:65660767-65661484|chr11:65664477-65667711
chr11:65977832-65978730	0	0	0	3	0	2	chr11	65977832	65978730	+	2	90.126	0.772	circRNA	PACS1	uc001ogz.1	3.4	chr11:65961044-65977832|chr11:65978730-65983589
chr11:66133406-66137003	0	2	1	2	2	1	chr11	66133406	66137003	-	8	86,106,134,85,98,135,72,164	0,190,495,1528,1836,2601,3124,3433	circRNA	SLC29A2	uc009yrf.3	10,9,8,7,6,5,4,3	chr11:66131895-66133406|chr11:66137003-66138714
chr11:66254010-66255478	0	2	5	5	6	2	chr11	66254010	66255478	+	3	138,75,94	0,728,1374	circRNA	DPP3	ENST00000531863	4,5,6	chr11:66252733-66254010|chr11:66255478-66258723
chr11:66407170-66407594	2	5	20	14	21	21	chr11	66407170	66407594	+	1	424	0	circRNA	RBM14-RBM4	uc009yrj.3	2	chr11:66384528-66407170|chr11:66407594-66410920
chr11:66436085-66436762	0	0	0	0	0	5	chr11	66436085	66436762	-	1	677	0	circRNA	RBM4B	NM_031492	3	chr11:66433049-66436085|chr11:66436762-66444138
chr11:66947549-66975159	0	1	2	3	3	0	chr11	66947549	66975159	+	4	139,79,47,179	0,1241,1767,27431	circRNA	KDM2A	ENST00000398645	3,4,5,6	chr11:66888829-66947549|chr11:66975159-66982810
chr11:66985201-66986874	0	0	2	0	1	0	chr11	66985201	66986874	+	2	154.116	0.1557	circRNA	KDM2A	ENST00000398645	9.1	chr11:66983420-66985201|chr11:66986874-66995507
chr11:67160966-67161261	0	0	2	0	0	0	chr11	67160966	67161261	+	2	115.1	0.195	circRNA	RAD9A	ENST00000543808	4.5	chr11:67160253-67160966|chr11:67161261-67163186
chr11:67829419-67848924	0	0	0	2	0	0	chr11	67829419	67848924	-	9	82,107,109,88,59,105,134,114,54	0,2572,3833,4476,6926,8236,8771,12764,19451	circRNA	CHKA	ENST00000265689	11,10,9,8,7,6,5,4,3	chr11:67821514-67829419|chr11:67848924-67864485
chr11:67934448-67957619	0	2	2	2	5	3	chr11	67934448	67957619	-	10	197,137,20,167,110,166,68,69,148,236	0,4033,4250,4561,6822,8036,12488,13150,18799,22935	circRNA	KMT5B	NM_001300907	11,10,9,8,7,6,5,4,3,2	chr11:67926638-67934448|chr11:67957619-67980604
chr11:67938481-67953395	0	2	2	0	0	0	chr11	67938481	67953395	-	8	137,20,167,110,166,68,69,148	0,217,528,2789,4003,8455,9117,14766	circRNA	KMT5B	NM_001300907	10,9,8,7,6,5,4,3	chr11:67934645-67938481|chr11:67953395-67957383
chr11:67942484-67953395	0	2	0	0	0	1	chr11	67942484	67953395	-	4	166,68,69,148	0,4452,5114,10763	circRNA	KMT5B	NM_001300907	6,5,4,3	chr11:67941380-67942484|chr11:67953395-67957383
chr11:67953247-67957619	0	0	2	0	1	1	chr11	67953247	67957619	-	2	148.236	0.4136	circRNA	KMT5B	NM_001300907	3.2	chr11:67947667-67953247|chr11:67957619-67980604
chr11:68115314-68115711	0	1	0	1	5	1	chr11	68115314	68115711	+	1	397	0	circRNA	LRP5	ENST00000294304	2	chr11:68080273-68115314|chr11:68115711-68125117
chr11:68115314-68125315	0	4	0	3	1	1	chr11	68115314	68125315	+	2	397.198	0.9803	circRNA	LRP5	ENST00000294304	2.3	chr11:68080273-68115314|chr11:68125315-68131214
chr11:68115314-68133170	0	2	3	2	2	0	chr11	68115314	68133170	+	4	397,198,197,132	0,9803,15900,17724	circRNA	LRP5	ENST00000294304	2,3,4,5	chr11:68080273-68115314|chr11:68133170-68153783
chr11:68183795-68193655	0	1	0	2	0	0	chr11	68183795	68193655	+	4	200,209,191,210	0,7161,8774,9650	circRNA	LRP5	ENST00000294304	13,14,15,16	chr11:68181480-68183795|chr11:68193655-68197042
chr11:68272612-68287119	1	1	3	0	3	3	chr11	68272612	68287119	+	2	127.151	0.14356	circRNA	PPP6R3	uc010rqb.1	2.3	chr11:68228295-68272612|chr11:68287119-68312305
chr11:68272612-68305359	0	1	1	4	4	4	chr11	68272612	68305359	+	3	105,151,233	0,14356,32514	circRNA	PPP6R3	NM_001164164	2,3,4	chr11:68228295-68272612|chr11:68305359-68312305
chr11:68282495-68315672	0	2	0	0	0	0	chr11	68282495	68315672	+	5	139,151,233,187,138	0,4473,22631,29810,33039	circRNA	PPP6R3	NM_001352379	3,4,5,6,7	chr11:68272739-68282495|chr11:68315672-68318588
chr11:68286968-68305359	0	0	3	1	0	0	chr11	68286968	68305359	+	2	151.233	0.18158	circRNA	PPP6R3	ENST00000393799	2.3	chr11:68228295-68286968|chr11:68305359-68312305
chr11:68286968-68318654	0	0	0	2	0	1	chr11	68286968	68318654	+	4	151,187,138,66	0,25337,28566,31620	circRNA	PPP6R3	uc010rqb.1	3,4,5,6	chr11:68272739-68286968|chr11:68318654-68321612
chr11:68305126-68343511	0	0	2	0	0	0	chr11	68305126	68343511	+	12	233,187,138,66,113,114,130,153,150,65,116,86	0,7179,10408,13462,16486,20907,26644,29355,32089,33381,36450,38299	circRNA	PPP6R3	ENST00000393799	3,4,5,6,7,8,9,10,11,12,13,14	chr11:68287119-68305126|chr11:68343511-68350510
chr11:68318588-68331900	2	1	4	7	5	3	chr11	68318588	68331900	+	4	66,113,114,130	0,3024,7445,13182	circRNA	PPP6R3	ENST00000393799	6,7,8,9	chr11:68315672-68318588|chr11:68331900-68334481
chr11:68331770-68343511	0	0	0	1	2	0	chr11	68331770	68343511	+	6	130,153,150,65,116,86	0,2711,5445,6737,9806,11655	circRNA	PPP6R3	ENST00000393799	9,10,11,12,13,14	chr11:68326147-68331770|chr11:68343511-68350510
chr11:68334481-68343511	2	6	8	7	7	10	chr11	68334481	68343511	+	5	153,150,65,116,86	0,2734,4026,7095,8944	circRNA	PPP6R3	ENST00000393799	10,11,12,13,14	chr11:68331900-68334481|chr11:68343511-68350510
chr11:68334481-68350597	0	0	1	2	6	1	chr11	68334481	68350597	+	6	153,150,65,116,86,87	0,2734,4026,7095,8944,16029	circRNA	PPP6R3	ENST00000393799	10,11,12,13,14,15	chr11:68331900-68334481|chr11:68350597-68355394
chr11:68334481-68363686	1	7	3	5	8	8	chr11	68334481	68363686	+	10	153,150,65,116,86,87,98,55,131,122	0,2734,4026,7095,8944,16029,20913,23646,24562,29083	circRNA	PPP6R3	ENST00000393799	10,11,12,13,14,15,16,17,18,19	chr11:68331900-68334481|chr11:68363686-68367808
chr11:68337215-68363686	1	0	2	3	0	2	chr11	68337215	68363686	+	9	150,65,116,86,87,98,55,131,122	0,1292,4361,6210,13295,18179,20912,21828,26349	circRNA	PPP6R3	ENST00000393799	11,12,13,14,15,16,17,18,19	chr11:68334634-68337215|chr11:68363686-68367808
chr11:68350510-68363686	1	2	4	4	4	3	chr11	68350510	68363686	+	5	87,98,55,131,122	0,4884,7617,8533,13054	circRNA	PPP6R3	ENST00000393799	15,16,17,18,19	chr11:68343511-68350510|chr11:68363686-68367808
chr11:68359043-68367962	1	4	4	6	5	4	chr11	68359043	68367962	+	3	131,122,154	0,4521,8765	circRNA	PPP6R3	ENST00000393799	18,19,20	chr11:68358182-68359043|chr11:68367962-68369330
chr11:68363564-68370960	0	4	3	2	5	2	chr11	68363564	68370960	+	4	122,154,107,151	0,4244,5766,7245	circRNA	PPP6R3	ENST00000393799	19,20,21,22	chr11:68359174-68363564|chr11:68370960-68370994
chr11:68367808-68370960	0	1	0	0	3	2	chr11	68367808	68370960	+	3	154,107,151	0,1522,3001	circRNA	PPP6R3	ENST00000393799	20,21,22	chr11:68363686-68367808|chr11:68370960-68370994
chr11:68369330-68370960	0	3	1	1	0	2	chr11	68369330	68370960	+	2	107.151	0.1479	circRNA	PPP6R3	ENST00000393799	21.22	chr11:68367962-68369330|chr11:68370960-68370994
chr11:68527036-68529155	0	2	3	1	6	1	chr11	68527036	68529155	-	3	93,114,153	0,656,1966	circRNA	CPT1A	ENST00000540367	17,16,15	chr11:68522319-68527036|chr11:68529155-68530094
chr11:68529002-68530229	0	0	0	0	2	0	chr11	68529002	68530229	-	2	153.135	0.1092	circRNA	CPT1A	ENST00000540367	15.14	chr11:68527806-68529002|chr11:68530229-68540732
chr11:68571467-68575106	3	5	2	6	6	9	chr11	68571467	68575106	-	2	102.172	0.3467	circRNA	CPT1A	ENST00000540367	4.3	chr11:68566823-68571467|chr11:68575106-68579904
chr11:68571467-68580044	0	2	2	5	1	1	chr11	68571467	68580044	-	3	102,172,140	0,3467,8437	circRNA	CPT1A	ENST00000540367	4,3,2	chr11:68566823-68571467|chr11:68580044-68582801
chr11:68574934-68580044	0	1	0	2	0	0	chr11	68574934	68580044	-	2	172.14	0.497	circRNA	CPT1A	ENST00000540367	3.2	chr11:68571569-68574934|chr11:68580044-68582801
chr11:68678907-68685351	0	0	2	0	0	0	chr11	68678907	68685351	+	3	164,201,148	0,3383,6296	circRNA	IGHMBP2	ENST00000255078	5,6,7	chr11:68676099-68678907|chr11:68685351-68696650
chr11:687910-691598	0	0	0	0	0	2	chr11	687910	691598	-	3	147,130,98	0,420,3590	circRNA	DEAF1	NM_001293634	4,3,2	chr11:684963-687910|chr11:691598-694758
chr11:6953324-6977013	0	0	3	2	0	4	chr11	6953324	6977013	+	5	579,83,133,96,93	0,9477,10989,11452,23596	circRNA	ZNF215	uc001mez.1	1,2,3,4,5	None|chr11:6977013-7005359
chr11:6962801-6977013	1	0	7	5	0	8	chr11	6962801	6977013	+	4	83,133,96,93	0,1512,1975,14119	circRNA	ZNF215	uc001mez.1	2,3,4,5	chr11:6953903-6962801|chr11:6977013-7005359
chr11:70170507-70172924	0	0	0	2	0	0	chr11	70170507	70172924	+	5	102,165,75,102,222	0,445,1098,1860,2195	circRNA	PPFIA1	NM_177423	3,4,5,6,7	chr11:70118542-70170507|chr11:70172924-70176278
chr11:70176278-70181800	1	3	3	0	2	1	chr11	70176278	70181800	+	4	147,135,84,132	0,1787,3297,5390	circRNA	PPFIA1	NM_177423	8,9,10,11	chr11:70172924-70176278|chr11:70181800-70183470
chr11:70176278-70194526	1	0	0	2	1	0	chr11	70176278	70194526	+	9	147,135,84,132,63,80,136,224,232	0,1787,3297,5390,7192,8201,8998,13496,18016	circRNA	PPFIA1	NM_177423	8,9,10,11,12,13,14,15,16	chr11:70172924-70176278|chr11:70194526-70200406
chr11:70200406-70202360	9	12	4	12	17	19	chr11	70200406	70202360	+	3	152,173,94	0,1338,1860	circRNA	PPFIA1	NM_177423	17,18,19	chr11:70194526-70200406|chr11:70202360-70208200
chr11:70200406-70208594	1	2	2	1	2	2	chr11	70200406	70208594	+	5	152,173,94,82,201	0,1338,1860,7794,7987	circRNA	PPFIA1	NM_177423	17,18,19,20,21	chr11:70194526-70200406|chr11:70208594-70218320
chr11:70269045-70277386	0	0	0	2	2	1	chr11	70269045	70277386	+	4	56,70,149,90	0,2392,6111,8251	circRNA	CTTN	ENST00000346329	11,12,13,14	chr11:70266616-70269045|chr11:70277386-70279206
chr11:70269045-70279384	0	0	0	0	3	0	chr11	70269045	70279384	+	5	56,70,149,90,178	0,2392,6111,8251,10161	circRNA	CTTN	ENST00000346329	11,12,13,14,15	chr11:70266616-70269045|chr11:70279384-70279752
chr11:71693806-71701763	0	1	2	2	4	1	chr11	71693806	71701763	+	3	155,108,121	0,4243,7836	circRNA	RNF121	ENST00000361756	4,5,6	chr11:71671937-71693806|chr11:71701763-71705764
chr11:72420914-72422544	0	1	1	5	1	0	chr11	72420914	72422544	-	4	107,203,121,70	0,515,1151,1560	circRNA	ARAP1	uc001osr.3	6,5,4,3	chr11:72418419-72420914|chr11:72422544-72423240
chr11:72423240-72424288	1	3	3	6	7	2	chr11	72423240	72424288	-	3	144,131,68	0,242,980	circRNA	ARAP1	NM_001135190	5,4,3	chr11:72422544-72423240|chr11:72424288-72425196
chr11:72468811-72470426	0	2	2	3	0	1	chr11	72468811	72470426	-	3	118,104,148	0,763,1467	circRNA	STARD10	uc001osy.3	5,4,3	chr11:72466798-72468811|chr11:72470426-72492019
chr11:72578909-72600990	0	2	0	2	2	2	chr11	72578909	72600990	-	3	162,105,117	0,19605,21964	circRNA	FCHSD2	ENST00000311172	12,11,10	chr11:72560934-72578909|chr11:72600990-72613587
chr11:72695132-72700142	4	8	6	6	11	5	chr11	72695132	72700142	-	3	129,55,134	0,974,4876	circRNA	FCHSD2	ENST00000311172	7,6,5	chr11:72632995-72695132|chr11:72700142-72712034
chr11:72712034-72726930	0	0	2	1	1	1	chr11	72712034	72726930	-	2	145.77	0.14819	circRNA	FCHSD2	ENST00000311172	4.3	chr11:72700142-72712034|chr11:72726930-72794739
chr11:73100156-73102268	0	0	0	0	0	3	chr11	73100156	73102268	+	4	70,75,167,80	0,1439,1643,2032	circRNA	RELT	ENST00000064780	2,3,4,5	chr11:73087544-73100156|chr11:73102268-73103255
chr11:73418464-73429763	5	13	10	30	24	20	chr11	73418464	73429763	-	3	94,112,106	0,8831,11193	circRNA	RAB6A	NM_198896	6,5,4	chr11:73390765-73418464|chr11:73429763-73431890
chr11:73418464-73429935	6	6	13	22	19	12	chr11	73418464	73429935	-	3	94,112,106	0,8831,11365	circRNA	RAB6A	NM_001243719	6,5,4	chr11:73390765-73418464|chr11:73429935-73431890
chr11:73418464-73431944	3	9	10	16	29	22	chr11	73418464	73431944	-	4	94,112,106,54	0,8831,11365,13426	circRNA	RAB6A	NM_001243719	6,5,4,3	chr11:73390765-73418464|chr11:73431944-73441809
chr11:73418464-73441868	0	0	1	2	0	0	chr11	73418464	73441868	-	5	94,112,106,54,59	0,8831,11365,13426,23345	circRNA	RAB6A	NM_001243719	6,5,4,3,2	chr11:73390765-73418464|chr11:73441868-73471092
chr11:73829272-73834180	0	1	2	0	3	2	chr11	73829272	73834180	-	2	155.148	0.476	circRNA	C2CD3	NM_001286577	9.8	chr11:73825638-73829272|chr11:73834180-73843888
chr11:73914772-73915490	0	0	2	0	5	0	chr11	73914772	73915490	+	2	94.93	0.625	circRNA	PPME1	NM_001271593	2.3	chr11:73882567-73914772|chr11:73915490-73933356
chr11:73936249-73950301	0	1	0	0	3	1	chr11	73936249	73950301	+	5	52,155,91,66,124	0,5040,5707,10696,13928	circRNA	PPME1	NM_001271593	5,6,7,8,9	chr11:73933414-73936249|chr11:73950301-73957078
chr11:74315736-74331134	0	2	1	2	0	0	chr11	74315736	74331134	+	5	103,40,133,268,73	0,6807,8186,13845,15325	circRNA	POLD3	ENST00000263681	3,4,5,6,7	chr11:74305161-74315736|chr11:74331134-74336452
chr11:74500670-74521375	0	1	2	0	1	2	chr11	74500670	74521375	+	2	74.147	0.20558	circRNA	RNF169	ENST00000299563	2.3	chr11:74460427-74500670|chr11:74521375-74528640
chr11:74500670-74528759	1	7	7	8	12	8	chr11	74500670	74528759	+	3	74,147,119	0,20558,27970	circRNA	RNF169	ENST00000299563	2,3,4	chr11:74460427-74500670|chr11:74528759-74545720
chr11:74521228-74528759	1	1	1	4	0	3	chr11	74521228	74528759	+	2	147.119	0.7412	circRNA	RNF169	ENST00000299563	3.4	chr11:74500744-74521228|chr11:74528759-74545720
chr11:74638435-74644917	0	2	0	0	0	0	chr11	74638435	74644917	-	3	98,73,48	0,2909,6434	circRNA	XRRA1	ENST00000340360	7,6,5	chr11:74632392-74638435|chr11:74644917-74647928
chr11:74676078-74680744	0	4	3	5	3	5	chr11	74676078	74680744	+	3	84,161,135	0,729,4531	circRNA	SPCS2	ENST00000263672	2,3,4	chr11:74660444-74676078|chr11:74680744-74687901
chr11:755878-760253	0	1	0	4	3	1	chr11	755878	760253	+	3	124,108,132	0,3071,4243	circRNA	TALDO1	ENST00000319006	2,3,4	chr11:747578-755878|chr11:760253-763343
chr11:76071999-76077016	1	1	0	1	0	2	chr11	76071999	76077016	-	2	108.121	0.4896	circRNA	PRKRIR	ENST00000260045	3.2	chr11:76066698-76071999|chr11:76077016-76091791
chr11:76174864-76183884	0	1	1	1	5	1	chr11	76174864	76183884	+	2	260.277	0.8743	circRNA	C11orf30	ENST00000427574	8.9	chr11:76171129-76174864|chr11:76183884-76207258
chr11:76224429-76234335	0	0	0	0	2	1	chr11	76224429	76234335	+	3	150,171,137	0,2756,9769	circRNA	C11orf30	ENST00000524490	9,10,11	chr11:76183884-76224429|chr11:76234335-76237505
chr11:76227185-76239510	0	0	1	2	0	0	chr11	76227185	76239510	+	4	171,137,174,199	0,7013,10320,12126	circRNA	C11orf30	ENST00000524490	10,11,12,13	chr11:76224579-76227185|chr11:76239510-76246938
chr11:76670022-76709865	2	4	6	18	4	12	chr11	76670022	76709865	+	5	53,53,82,36,59	0,17310,26664,31560,39784	circRNA	ACER3	ENST00000534206	3,4,5,6,7	chr11:76637711-76670022|chr11:76709865-76726059
chr11:76670120-76709865	0	1	1	2	0	0	chr11	76670120	76709865	+	6	124,53,82,36,71,59	0,17212,26566,31462,35079,39686	circRNA	ACER3	uc009yul.1	4,5,6,7,8,9	chr11:76637711-76670120|chr11:76709865-76726059
chr11:77085372-77091039	0	0	1	4	0	1	chr11	77085372	77091039	-	3	38,148,101	0,4913,5566	circRNA	PAK1	ENST00000356341	5,4,3	chr11:77070062-77085372|chr11:77091039-77103375
chr11:77090285-77091039	1	0	0	3	0	4	chr11	77090285	77091039	-	2	148.101	0.653	circRNA	PAK1	ENST00000356341	4.3	chr11:77085410-77090285|chr11:77091039-77103375
chr11:77330650-77336863	4	19	22	22	20	17	chr11	77330650	77336863	-	4	90,174,108,102	0,2894,5357,6111	circRNA	CLNS1A	ENST00000525428	6,5,4,3	chr11:77327740-77330650|chr11:77336863-77340807
chr11:77330650-77340944	5	8	8	5	5	1	chr11	77330650	77340944	-	5	90,174,108,102,137	0,2894,5357,6111,10157	circRNA	CLNS1A	ENST00000525428	6,5,4,3,2	chr11:77327740-77330650|chr11:77340944-77348634
chr11:77333544-77336863	1	5	1	3	3	0	chr11	77333544	77336863	-	3	174,108,102	0,2463,3217	circRNA	CLNS1A	ENST00000525428	5,4,3	chr11:77330740-77333544|chr11:77336863-77340807
chr11:77333544-77340944	1	2	1	4	0	0	chr11	77333544	77340944	-	4	174,108,102,137	0,2463,3217,7263	circRNA	CLNS1A	ENST00000525428	5,4,3,2	chr11:77330740-77333544|chr11:77340944-77348634
chr11:77336007-77336863	7	14	11	15	8	10	chr11	77336007	77336863	-	2	108.102	0.754	circRNA	CLNS1A	ENST00000525428	4.3	chr11:77333718-77336007|chr11:77336863-77340807
chr11:77336007-77340944	1	5	7	4	4	8	chr11	77336007	77340944	-	3	108,102,137	0,754,4800	circRNA	CLNS1A	ENST00000525428	4,3,2	chr11:77333718-77336007|chr11:77340944-77348634
chr11:77383086-77404656	0	2	2	3	5	4	chr11	77383086	77404656	-	8	189,221,208,68,110,55,80,105	0,2994,4750,6044,11668,13063,19117,21465	circRNA	RSF1	ENST00000308488	15,14,13,12,11,10,9,8	chr11:77378536-77383086|chr11:77404656-77409531
chr11:77386080-77389198	1	4	8	8	8	8	chr11	77386080	77389198	-	3	221,208,68	0,1756,3050	circRNA	RSF1	ENST00000308488	14,13,12	chr11:77383275-77386080|chr11:77389198-77394754
chr11:77386080-77404656	4	10	11	8	5	9	chr11	77386080	77404656	-	7	221,208,68,110,55,80,105	0,1756,3050,8674,10069,16123,18471	circRNA	RSF1	ENST00000308488	14,13,12,11,10,9,8	chr11:77383275-77386080|chr11:77404656-77409531
chr11:77394754-77402283	0	0	2	0	3	0	chr11	77394754	77402283	-	3	110,55,80	0,1395,7449	circRNA	RSF1	ENST00000308488	11,10,9	chr11:77389198-77394754|chr11:77402283-77404551
chr11:77394754-77404656	5	20	9	29	34	25	chr11	77394754	77404656	-	4	110,55,80,105	0,1395,7449,9797	circRNA	RSF1	ENST00000308488	11,10,9,8	chr11:77389198-77394754|chr11:77404656-77409531
chr11:77396149-77404656	5	10	3	9	6	5	chr11	77396149	77404656	-	3	55,80,105	0,6054,8402	circRNA	RSF1	ENST00000308488	10,9,8	chr11:77394864-77396149|chr11:77404656-77409531
chr11:77402203-77404656	5	4	4	2	4	0	chr11	77402203	77404656	-	2	80.105	0.2348	circRNA	RSF1	ENST00000308488	9.8	chr11:77396204-77402203|chr11:77404656-77409531
chr11:77402203-77413540	1	3	3	5	3	1	chr11	77402203	77413540	-	4	80,105,207,1775	0,2348,7328,9562	circRNA	RSF1	ENST00000308488	9,8,7,6	chr11:77396204-77402203|chr11:77413540-77436589
chr11:77404551-77413540	0	4	2	2	6	7	chr11	77404551	77413540	-	3	105,207,1775	0,4980,7214	circRNA	RSF1	ENST00000308488	8,7,6	chr11:77402283-77404551|chr11:77413540-77436589
chr11:77409531-77413540	4	5	4	20	13	8	chr11	77409531	77413540	-	2	207.178	0.2234	circRNA	RSF1	ENST00000308488	7.6	chr11:77404656-77409531|chr11:77413540-77436589
chr11:77436589-77475734	1	2	0	2	0	0	chr11	77436589	77475734	-	4	155,206,93,92	0,15186,21491,39053	circRNA	RSF1	ENST00000308488	5,4,3,2	chr11:77413540-77436589|chr11:77475734-77531573
chr11:77451775-77475734	1	2	3	2	2	0	chr11	77451775	77475734	-	3	206,93,92	0,6305,23867	circRNA	RSF1	ENST00000308488	4,3,2	chr11:77436744-77451775|chr11:77475734-77531573
chr11:77649696-77692622	0	3	0	0	0	0	chr11	77649696	77692622	-	7	175,72,121,89,51,186,118	0,2529,17291,20095,21690,22302,42808	circRNA	INTS4	ENST00000433818	9,8,7,6,5,4,3	chr11:77639593-77649696|chr11:77692622-77702153
chr11:77666987-77672184	0	2	0	0	4	2	chr11	77666987	77672184	-	4	121,89,51,186	0,2804,4399,5011	circRNA	INTS4	ENST00000433818	7,6,5,4	chr11:77652297-77666987|chr11:77672184-77692504
chr11:77666987-77692622	1	1	2	1	2	0	chr11	77666987	77692622	-	5	121,89,51,186,118	0,2804,4399,5011,25517	circRNA	INTS4	ENST00000433818	7,6,5,4,3	chr11:77652297-77666987|chr11:77692622-77702153
chr11:77666987-77702345	0	2	0	0	0	1	chr11	77666987	77702345	-	6	121,89,51,186,118,192	0,2804,4399,5011,25517,35166	circRNA	INTS4	ENST00000433818	7,6,5,4,3,2	chr11:77652297-77666987|chr11:77702345-77705635
chr11:77815025-77838482	0	0	0	2	0	0	chr11	77815025	77838482	-	11	73,98,140,140,121,104,127,68,110,194,79	0,376,2827,5462,8670,9906,10286,15202,17085,20041,23378	circRNA	ALG8	NM_001007027	12,11,10,9,8,7,6,5,4,3,2	chr11:77813994-77815025|chr11:77838482-77850539
chr11:77824931-77832220	1	2	1	2	2	2	chr11	77824931	77832220	-	4	104,127,68,110	0,380,5296,7179	circRNA	ALG8	NM_001007027	7,6,5,4	chr11:77823816-77824931|chr11:77832220-77835066
chr11:78176921-78204241	1	4	2	1	3	1	chr11	78176921	78204241	-	5	138,67,38,99,133	0,3371,12562,12709,27187	circRNA	NARS2	ENST00000281038	11,10,9,8,7	chr11:78154804-78176921|chr11:78204241-78239887
chr11:78180292-78204241	3	2	1	3	0	2	chr11	78180292	78204241	-	4	67,38,99,133	0,9191,9338,23816	circRNA	NARS2	ENST00000281038	10,9,8,7	chr11:78177059-78180292|chr11:78204241-78239887
chr11:78180292-78282489	0	0	0	0	2	0	chr11	78180292	78282489	-	9	67,38,99,133,95,81,141,121,110	0,9191,9338,23816,59595,90292,96885,99385,102087	circRNA	NARS2	ENST00000281038	10,9,8,7,6,5,4,3,2	chr11:78177059-78180292|chr11:78282489-78285392
chr11:78270584-78282489	0	3	1	2	4	1	chr11	78270584	78282489	-	4	81,141,121,110	0,6593,9093,11795	circRNA	NARS2	ENST00000281038	5,4,3,2	chr11:78239982-78270584|chr11:78282489-78285392
chr11:8158924-8174970	0	2	0	0	0	0	chr11	8158924	8174970	-	4	94,76,227,49	0,894,2589,15997	circRNA	RIC3	NR_144485	5,4,3,2	chr11:8148351-8158924|chr11:8174970-8190412
chr11:82560090-82571159	0	0	1	0	2	1	chr11	82560090	82571159	-	5	170,158,182,102,141	0,865,1275,4128,10928	circRNA	PRCP	NM_005040	6,5,4,3,2	chr11:82550467-82560090|chr11:82571159-82611276
chr11:82917099-82947551	1	1	0	0	3	2	chr11	82917099	82947551	+	6	108,120,136,201,126,106	0,4242,5237,18797,21689,30346	circRNA	ANKRD42	NM_001300975	3,4,5,6,7,8	chr11:82909684-82917099|chr11:82947551-82951800
chr11:82984689-82989872	0	0	2	3	2	0	chr11	82984689	82989872	-	5	54,72,42,102,104	0,146,304,992,5079	circRNA	CCDC90B	NM_001286116	7,6,5,4,3	chr11:82977021-82984689|chr11:82989872-82991183
chr11:82989768-82991303	0	0	1	1	2	0	chr11	82989768	82991303	-	2	104.12	0.1415	circRNA	CCDC90B	NM_001286116	3.2	chr11:82985783-82989768|chr11:82991303-82997142
chr11:8474368-8486369	2	1	0	0	0	0	chr11	8474368	8486369	-	5	85,89,139,105,114	0,1922,4519,8983,11887	circRNA	STK33	NM_001289061	8,7,6,5,4	chr11:8462300-8474368|chr11:8486369-8494709
chr11:85309700-85337797	0	0	3	0	2	0	chr11	85309700	85337797	-	2	132.167	0.2793	circRNA	DLG2	NM_001142699	3.2	chr11:84996409-85309700|chr11:85337797-85338261
chr11:85685750-85695016	1	2	5	6	8	8	chr11	85685750	85695016	-	7	105,60,24,100,31,117,108	0,1915,3362,6421,7037,7164,9158	circRNA	PICALM	uc010rtk.2	11,10,9,8,7,6,5	chr11:85670103-85685750|chr11:85695016-85707868
chr11:85685750-85742653	1	2	7	6	7	5	chr11	85685750	85742653	-	18	105,60,24,100,31,132,108,104,137,124,86,42,107,112,94,103,76,143	0,1915,3362,6421,7037,7164,9158,22118,25935,26327,28658,32834,36322,37573,40162,47659,51583,56760	circRNA	PICALM	NM_001008660	19,18,17,16,15,14,13,12,11,10,9,8,7,6,5,4,3,2	chr11:85670103-85685750|chr11:85742653-85779692
chr11:85692171-85693031	0	0	0	0	0	3	chr11	85692171	85693031	-	3	100,31,117	0,616,743	circRNA	PICALM	uc010rtk.2	8,7,6	chr11:85689136-85692171|chr11:85693031-85694908
chr11:85692171-85693046	0	0	0	4	6	1	chr11	85692171	85693046	-	3	100,31,132	0,616,743	circRNA	PICALM	NM_001008660	16,15,14	chr11:85689136-85692171|chr11:85693046-85694908
chr11:85692171-85695016	0	1	1	3	3	1	chr11	85692171	85695016	-	4	100,31,117,108	0,616,743,2737	circRNA	PICALM	uc010rtk.2	8,7,6,5	chr11:85689136-85692171|chr11:85695016-85707868
chr11:85692171-85742653	2	3	1	3	3	3	chr11	85692171	85742653	-	15	100,31,132,108,104,137,124,86,42,107,112,94,103,76,143	0,616,743,2737,15697,19514,19906,22237,26413,29901,31152,33741,41238,45162,50339	circRNA	PICALM	NM_001008660	16,15,14,13,12,11,10,9,8,7,6,5,4,3,2	chr11:85689136-85692171|chr11:85742653-85779692
chr11:85692787-85695016	2	1	2	4	0	4	chr11	85692787	85695016	-	3	31,117,108	0,127,2121	circRNA	PICALM	uc010rtk.2	7,6,5	chr11:85692271-85692787|chr11:85695016-85707868
chr11:85692787-85701442	0	1	0	0	3	0	chr11	85692787	85701442	-	4	31,132,108,150	0,127,2121,8505	circRNA	PICALM	NM_007166	16,15,14,13	chr11:85692271-85692787|chr11:85701442-85707868
chr11:85694908-85714494	0	0	2	0	0	0	chr11	85694908	85714494	-	5	108,104,137,124,86	0,12960,16777,17169,19500	circRNA	PICALM	NM_001008660	13,12,11,10,9	chr11:85693046-85694908|chr11:85714494-85718584
chr11:85701292-85742653	1	0	2	4	4	2	chr11	85701292	85742653	-	12	129,104,137,124,86,42,107,112,94,103,76,143	0,6576,10393,10785,13116,17292,20780,22031,24620,32117,36041,41218	circRNA	PICALM	NM_001206946	13,12,11,10,9,8,7,6,5,4,3,2	chr11:85695016-85701292|chr11:85742653-85779692
chr11:85707868-85712201	0	1	1	5	8	2	chr11	85707868	85712201	-	3	104,137,124	0,3817,4209	circRNA	PICALM	uc010rtk.2	4,3,2	chr11:85695016-85707868|chr11:85712201-85714408
chr11:85707868-85714494	2	7	16	19	21	18	chr11	85707868	85714494	-	4	104,137,124,86	0,3817,4209,6540	circRNA	PICALM	NM_001008660	12,11,10,9	chr11:85695016-85707868|chr11:85714494-85718584
chr11:85707868-85718626	0	2	1	1	6	1	chr11	85707868	85718626	-	5	104,137,124,86,42	0,3817,4209,6540,10716	circRNA	PICALM	NM_001008660	12,11,10,9,8	chr11:85695016-85707868|chr11:85718626-85722072
chr11:85707868-85742653	14	15	12	48	37	24	chr11	85707868	85742653	-	11	104,137,124,86,42,107,112,94,103,76,143	0,3817,4209,6540,10716,14204,15455,18044,25541,29465,34642	circRNA	PICALM	NM_001008660	12,11,10,9,8,7,6,5,4,3,2	chr11:85695016-85707868|chr11:85742653-85779692
chr11:85711685-85742653	4	1	0	1	4	2	chr11	85711685	85742653	-	10	137,124,86,42,107,112,94,103,76,143	0,392,2723,6899,10387,11638,14227,21724,25648,30825	circRNA	PICALM	NM_001008660	11,10,9,8,7,6,5,4,3,2	chr11:85707972-85711685|chr11:85742653-85779692
chr11:85718584-85742653	5	14	20	17	7	9	chr11	85718584	85742653	-	7	42,107,112,94,103,76,143	0,3488,4739,7328,14825,18749,23926	circRNA	PICALM	NM_001008660	8,7,6,5,4,3,2	chr11:85714494-85718584|chr11:85742653-85779692
chr11:85722072-85742653	3	9	7	23	19	5	chr11	85722072	85742653	-	6	107,112,94,103,76,143	0,1251,3840,11337,15261,20438	circRNA	PICALM	NM_001008660	7,6,5,4,3,2	chr11:85718626-85722072|chr11:85742653-85779692
chr11:85723323-85742653	0	1	1	1	6	1	chr11	85723323	85742653	-	5	112,94,103,76,143	0,2589,10086,14010,19187	circRNA	PICALM	NM_001008660	6,5,4,3,2	chr11:85722179-85723323|chr11:85742653-85779692
chr11:85725912-85737409	0	0	0	0	0	2	chr11	85725912	85737409	-	3	94,103,76	0,7497,11421	circRNA	PICALM	NM_001008660	5,4,3	chr11:85723435-85725912|chr11:85737409-85742510
chr11:85733409-85742653	2	6	6	12	12	7	chr11	85733409	85742653	-	3	103,76,143	0,3924,9101	circRNA	PICALM	NM_001008660	4,3,2	chr11:85726006-85733409|chr11:85742653-85779692
chr11:85961337-85967554	0	0	4	1	2	0	chr11	85961337	85967554	+	4	153,93,66,126	0,1852,4926,6091	circRNA	EED	NM_001308007	2,3,4,5	chr11:85956385-85961337|chr11:85967554-85968556
chr11:86037554-86048572	0	0	0	0	0	2	chr11	86037554	86048572	+	2	164.152	0.10866	circRNA	C11orf73	ENST00000528004	3.4	chr11:86017524-86037554|chr11:86048572-86055644
chr11:86097092-86103839	0	0	2	0	0	0	chr11	86097092	86103839	+	3	62,157,257	0,1465,6490	circRNA	CCDC81	ENST00000278487	2,3,4	chr11:86086284-86097092|chr11:86103839-86106375
chr11:86267594-86270865	0	2	0	3	3	2	chr11	86267594	86270865	-	2	150.134	0.3137	circRNA	ME3	ENST00000393324	3.2	chr11:86219909-86267594|chr11:86270865-86382803
chr11:8643191-8646098	0	0	0	0	2	0	chr11	8643191	8646098	-	3	175,61,193	0,1171,2714	circRNA	TRIM66	ENST00000402157	16,15,14	chr11:8642868-8643191|chr11:8646098-8646259
chr11:86778735-86782657	1	2	1	3	0	0	chr11	86778735	86782657	+	2	128.93	0.3829	circRNA	TMEM135	uc001pcg.2	2.3	chr11:86749228-86778735|chr11:86782657-86802403
chr11:86778735-86802437	3	3	10	5	13	6	chr11	86778735	86802437	+	3	128,93,34	0,3829,23668	circRNA	TMEM135	uc001pcg.2	2,3,4	chr11:86749228-86778735|chr11:86802437-86889498
chr11:88033697-88045722	0	0	0	0	2	1	chr11	88033697	88045722	-	3	116,156,167	0,8633,11858	circRNA	CTSC	uc001pck.4	5,4,3	chr11:88029432-88033697|chr11:88045722-88068104
chr11:88042330-88045722	0	0	3	2	0	2	chr11	88042330	88045722	-	2	156.167	0.3225	circRNA	CTSC	uc001pck.4	4.3	chr11:88033813-88042330|chr11:88045722-88068104
chr11:883147-884169	1	2	0	0	0	2	chr11	883147	884169	-	2	156.102	0.92	circRNA	CHID1	ENST00000323541	10.9	chr11:870499-883147|chr11:884169-893426
chr11:9308001-9316934	2	1	1	1	4	0	chr11	9308001	9316934	-	4	139,105,94,129	0,1247,1987,8804	circRNA	TMEM41B	ENST00000299596	6,5,4,3	chr11:9305140-9308001|chr11:9316934-9321130
chr11:9308001-9321248	0	0	0	3	1	0	chr11	9308001	9321248	-	5	139,105,94,129,118	0,1247,1987,8804,13129	circRNA	TMEM41B	ENST00000299596	6,5,4,3,2	chr11:9305140-9308001|chr11:9321248-9335867
chr11:9309248-9316934	0	2	0	2	0	3	chr11	9309248	9316934	-	3	105,94,129	0,740,7557	circRNA	TMEM41B	ENST00000299596	5,4,3	chr11:9308140-9309248|chr11:9316934-9321130
chr11:9309248-9321248	0	0	0	0	2	0	chr11	9309248	9321248	-	4	105,94,129,118	0,740,7557,11882	circRNA	TMEM41B	ENST00000299596	5,4,3,2	chr11:9308140-9309248|chr11:9321248-9335867
chr11:93399847-93402936	0	0	1	1	4	1	chr11	93399847	93402936	+	4	134,201,125,94	0,925,2126,2995	circRNA	KIAA1731	ENST00000325212	2,3,4,5	chr11:93394940-93399847|chr11:93402936-93408736
chr11:93399847-93412718	0	0	0	0	1	2	chr11	93399847	93412718	+	6	134,201,125,94,96,141	0,925,2126,2995,8889,12730	circRNA	KIAA1731	ENST00000325212	2,3,4,5,6,7	chr11:93394940-93399847|chr11:93412718-93416724
chr11:93429485-93433352	1	8	5	5	7	6	chr11	93429485	93433352	+	2	98.3505	0.362	circRNA	KIAA1731	ENST00000325212	14.15	chr11:93428800-93429485|chr11:93433352-93435625
chr11:93454477-93456455	0	0	2	3	0	0	chr11	93454477	93456455	+	3	101,97,249	0,642,1729	circRNA	KIAA1731	ENST00000325212	19,20,21	chr11:93440063-93454477|chr11:93456455-93457419
chr11:93469306-93471665	0	0	0	1	2	0	chr11	93469306	93471665	-	4	164,58,176,391	0,553,923,1968	circRNA	TAF1D	ENST00000323981	6,5,4,3	chr11:93467826-93469306|chr11:93471665-93472402
chr11:93469306-93472497	0	0	0	2	0	0	chr11	93469306	93472497	-	5	164,58,176,391,95	0,553,923,1968,3096	circRNA	TAF1D	ENST00000323981	6,5,4,3,2	chr11:93467826-93469306|chr11:93472497-93474487
chr11:93480462-93490631	0	4	0	4	1	0	chr11	93480462	93490631	+	6	152,99,74,102,177,150	0,3049,6385,6639,7913,10019	circRNA	C11orf54	NM_001286067	3,4,5,6,7,8	chr11:93475260-93480462|chr11:93490631-93492907
chr11:93521166-93527201	0	0	0	0	2	0	chr11	93521166	93527201	+	4	167,220,137,85	0,2573,5727,5950	circRNA	MED17	ENST00000251871	2,3,4,5	chr11:93517929-93521166|chr11:93527201-93528073
chr11:93523739-93527201	0	2	1	2	2	1	chr11	93523739	93527201	+	3	220,137,85	0,3154,3377	circRNA	MED17	ENST00000251871	3,4,5	chr11:93521333-93523739|chr11:93527201-93528073
chr11:94163076-94180604	0	1	1	0	3	1	chr11	94163076	94180604	-	4	76,68,59,220	0,5921,7266,17308	circRNA	MRE11	NM_005590	18,17,16,15	chr11:94153347-94163076|chr11:94180604-94189441
chr11:94178975-94180604	1	8	6	5	6	11	chr11	94178975	94180604	-	2	84.22	0.1409	circRNA	MRE11	NM_005591	16.15	chr11:94170401-94178975|chr11:94180604-94189441
chr11:94180384-94197405	0	0	3	0	0	0	chr11	94180384	94197405	-	5	220,63,174,101,127	0,9057,12189,13717,16894	circRNA	MRE11	NM_005590	15,14,13,12,11	chr11:94170401-94180384|chr11:94197405-94200978
chr11:94219089-94224131	0	2	0	2	2	1	chr11	94219089	94224131	-	2	161.133	0.4909	circRNA	MRE11	NM_005590	4.3	chr11:94212927-94219089|chr11:94224131-94225947
chr11:9430032-9435958	0	0	1	0	0	2	chr11	9430032	9435958	+	3	154,159,157	0,1442,5769	circRNA	IPO7	ENST00000379719	3,4,5	chr11:9424918-9430032|chr11:9435958-9438605
chr11:9430032-9442245	0	0	1	3	2	1	chr11	9430032	9442245	+	6	154,159,157,90,95,85	0,1442,5769,8573,11925,12128	circRNA	IPO7	ENST00000379719	3,4,5,6,7,8	chr11:9424918-9430032|chr11:9442245-9444552
chr11:9435801-9438695	0	0	3	1	1	1	chr11	9435801	9438695	+	2	157.9	0.2804	circRNA	IPO7	ENST00000379719	5.6	chr11:9431633-9435801|chr11:9438695-9441957
chr11:9435801-9442245	0	0	0	0	0	2	chr11	9435801	9442245	+	4	157,90,95,85	0,2804,6156,6359	circRNA	IPO7	ENST00000379719	5,6,7,8	chr11:9431633-9435801|chr11:9442245-9444552
chr11:9435801-9446809	0	1	1	0	0	4	chr11	9435801	9446809	+	8	157,90,95,85,135,100,77,117	0,2804,6156,6359,8751,9522,10659,10891	circRNA	IPO7	ENST00000379719	5,6,7,8,9,10,11,12	chr11:9431633-9435801|chr11:9446809-9450086
chr11:9441957-9446809	3	3	7	5	6	2	chr11	9441957	9446809	+	6	95,85,135,100,77,117	0,203,2595,3366,4503,4735	circRNA	IPO7	ENST00000379719	7,8,9,10,11,12	chr11:9438695-9441957|chr11:9446809-9450086
chr11:9444552-9446809	0	1	0	0	2	0	chr11	9444552	9446809	+	4	135,100,77,117	0,771,1908,2140	circRNA	IPO7	ENST00000379719	9,10,11,12	chr11:9442245-9444552|chr11:9446809-9450086
chr11:9450086-9452550	0	0	1	1	0	3	chr11	9450086	9452550	+	4	90,166,161,129	0,491,1134,2335	circRNA	IPO7	ENST00000379719	13,14,15,16	chr11:9446809-9450086|chr11:9452550-9455116
chr11:9450086-9459832	0	0	0	0	2	0	chr11	9450086	9459832	+	10	90,166,161,129,67,126,98,96,221,206	0,491,1134,2335,5030,5181,6394,7731,9214,9540	circRNA	IPO7	ENST00000379719	13,14,15,16,17,18,19,20,21,22	chr11:9446809-9450086|chr11:9459832-9462001
chr11:9451220-9452550	0	4	13	8	9	7	chr11	9451220	9452550	+	2	161.129	0.1201	circRNA	IPO7	ENST00000379719	15.16	chr11:9450743-9451220|chr11:9452550-9455116
chr11:94528176-94533477	3	6	3	3	5	3	chr11	94528176	94533477	+	2	150.922	0.4379	circRNA	AMOTL1	ENST00000317837	2.3	chr11:94501726-94528176|chr11:94533477-94554695
chr11:94532555-94533477	1	7	7	5	1	6	chr11	94532555	94533477	+	1	922	0	circRNA	AMOTL1	ENST00000317829	2	chr11:94501726-94532555|chr11:94533477-94554695
chr11:9456480-9459832	0	0	2	0	0	1	chr11	9456480	9459832	+	4	98,96,221,206	0,1337,2820,3146	circRNA	IPO7	ENST00000379719	19,20,21,22	chr11:9455393-9456480|chr11:9459832-9462001
chr11:9459300-9463744	0	0	2	0	1	0	chr11	9459300	9463744	+	4	221,206,207,117	0,326,2701,4327	circRNA	IPO7	ENST00000379719	21,22,23,24	chr11:9457913-9459300|chr11:9463744-9466643
chr11:9462001-9463744	0	4	3	4	4	4	chr11	9462001	9463744	+	2	207.117	0.1626	circRNA	IPO7	ENST00000379719	23.24	chr11:9459832-9462001|chr11:9463744-9466643
chr11:94910882-94926686	0	0	3	0	0	1	chr11	94910882	94926686	-	7	191,119,175,237,183,198,66	0,991,6701,7537,12060,13685,15738	circRNA	SESN3	NM_144665	8,7,6,5,4,3,2	chr11:94908806-94910882|chr11:94926686-94963946
chr11:95509085-95520842	0	3	0	0	0	0	chr11	95509085	95520842	-	7	102,136,81,48,200,156,55	0,2900,3685,3957,7143,10197,11702	circRNA	FAM76B	NM_144664	9,8,7,6,5,4,3	chr11:95504814-95509085|chr11:95520842-95521662
chr11:95532395-95546753	0	0	0	0	0	2	chr11	95532395	95546753	+	3	157,180,122	0,13700,14236	circRNA	CEP57	ENST00000537677	2,3,4	chr11:95523306-95532395|chr11:95546753-95550950
chr11:95546095-95546753	1	5	9	3	10	5	chr11	95546095	95546753	+	2	180.122	0.536	circRNA	CEP57	ENST00000537677	3.4	chr11:95532552-95546095|chr11:95546753-95550950
chr11:95546095-95552068	2	2	4	3	2	2	chr11	95546095	95552068	+	4	180,122,117,78	0,536,4855,5895	circRNA	CEP57	ENST00000537677	3,4,5,6	chr11:95532552-95546095|chr11:95552068-95555034
chr11:956785-959505	2	0	0	1	0	0	chr11	956785	959505	+	2	197.69	0.2651	circRNA	AP2A2	ENST00000529858	2.3	chr11:926088-956785|chr11:959505-970168
chr11:9735012-9754257	1	2	1	0	3	0	chr11	9735012	9754257	+	5	174,228,147,109,182	0,11192,14587,15877,19063	circRNA	SWAP70	ENST00000318950	3,4,5,6,7	chr11:9715833-9735012|chr11:9754257-9759759
chr11:985434-988689	0	2	0	0	0	0	chr11	985434	988689	+	3	148,169,138	0,1350,3117	circRNA	AP2A2	NM_012305	8,9,10	chr11:984753-985434|chr11:988689-992502
chr11:992502-994245	0	1	2	2	1	1	chr11	992502	994245	+	4	183,98,232,174	0,781,1251,1569	circRNA	AP2A2	uc009yco.2	11,12,13,14	chr11:988689-992502|chr11:994245-1003721
chr12:1003727-1006847	0	1	1	2	5	1	chr12	1003727	1006847	+	3	74,662,203	0,1509,2917	circRNA	WNK1	ENST00000535572	21,22,23	chr12:999676-1003727|chr12:1006847-1009641
chr12:100489444-100497729	0	0	2	0	0	0	chr12	100489444	100497729	-	5	171,141,190,92,39	0,1698,2685,7099,8246	circRNA	UHRF1BP1L	ENST00000279907	7,6,5,4,3	chr12:100482873-100489444|chr12:100497729-100502163
chr12:100491142-100497729	0	0	0	1	0	2	chr12	100491142	100497729	-	4	141,190,92,39	0,987,5401,6548	circRNA	UHRF1BP1L	ENST00000279907	6,5,4,3	chr12:100489615-100491142|chr12:100497729-100502163
chr12:100496543-100502326	0	0	0	0	2	1	chr12	100496543	100502326	-	3	92,39,163	0,1147,5620	circRNA	UHRF1BP1L	ENST00000279907	4,3,2	chr12:100492319-100496543|chr12:100502326-100536369
chr12:100598717-100599535	2	1	0	0	0	0	chr12	100598717	100599535	+	2	118.82	0.736	circRNA	ACTR6	uc001thc.2	2.3	chr12:100594697-100598717|chr12:100599535-100601440
chr12:100676720-100685438	0	0	3	0	1	2	chr12	100676720	100685438	+	2	205.158	0.856	circRNA	SCYL2	ENST00000549687	2.3	chr12:100661174-100676720|chr12:100685438-100691808
chr12:100676720-100691953	4	2	15	33	31	20	chr12	100676720	100691953	+	3	205,158,145	0,8560,15088	circRNA	SCYL2	ENST00000549687	2,3,4	chr12:100661174-100676720|chr12:100691953-100704821
chr12:100676720-100723097	0	0	1	2	0	0	chr12	100676720	100723097	+	12	205,158,145,150,222,117,126,177,123,114,133,119	0,8560,15088,28101,29489,30479,31546,32615,34860,40582,43679,46258	circRNA	SCYL2	ENST00000549687	2,3,4,5,6,7,8,9,10,11,12,13	chr12:100661174-100676720|chr12:100723097-100727943
chr12:100707199-100723097	0	1	0	1	4	0	chr12	100707199	100723097	+	7	117,126,177,123,114,133,119	0,1067,2136,4381,10103,13200,15779	circRNA	SCYL2	ENST00000549687	7,8,9,10,11,12,13	chr12:100706431-100707199|chr12:100723097-100727943
chr12:100985513-101005919	0	0	2	0	0	2	chr12	100985513	101005919	+	5	121,48,169,116,142	0,3139,8646,9902,20264	circRNA	GAS2L3	NM_174942	2,3,4,5,6	chr12:100967563-100985513|chr12:101005919-101011521
chr12:101750331-101759403	0	0	1	0	2	1	chr12	101750331	101759403	+	5	140,157,99,168,167	0,372,5408,7022,8905	circRNA	UTP20	ENST00000261637	42,43,44,45,46	chr12:101748896-101750331|chr12:101759403-101760335
chr12:102107867-102110590	0	2	0	0	3	0	chr12	102107867	102110590	+	4	148,142,193,85	0,414,794,2638	circRNA	CHPT1	ENST00000550385	2,3,4,5	chr12:102090806-102107867|chr12:102110590-102113900
chr12:102173929-102183835	0	3	2	0	0	0	chr12	102173929	102183835	-	5	135,65,206,42,120	0,405,5860,8396,9786	circRNA	GNPTAB	NM_024312	7,6,5,4,3	chr12:102164935-102173929|chr12:102183835-102190454
chr12:102301963-102308010	1	0	3	7	2	0	chr12	102301963	102308010	+	2	178.59	0.5988	circRNA	DRAM1	NM_018370	4.5	chr12:102295211-102301963|chr12:102308010-102313886
chr12:102419751-102439897	0	0	2	5	1	0	chr12	102419751	102439897	-	4	65,108,108,66	0,13894,18131,20080	circRNA	WASHC3	NM_001301107	6,5,4,3	chr12:102406970-102419751|chr12:102439897-102455025
chr12:102419751-102455124	0	1	0	2	0	0	chr12	102419751	102455124	-	5	65,108,108,66,99	0,13894,18131,20080,35274	circRNA	WASHC3	NM_001301107	6,5,4,3,2	chr12:102406970-102419751|chr12:102455124-102455689
chr12:102433645-102439897	0	1	0	6	2	1	chr12	102433645	102439897	-	3	108,108,66	0,4237,6186	circRNA	WASHC3	NM_001301107	5,4,3	chr12:102419816-102433645|chr12:102439897-102455025
chr12:102492883-102506010	0	2	0	2	3	0	chr12	102492883	102506010	-	3	95,73,125	0,1926,13002	circRNA	NUP37	ENST00000552283	5,4,3	chr12:102479634-102492883|chr12:102506010-102512140
chr12:102517663-102547754	0	0	0	0	2	0	chr12	102517663	102547754	+	4	156,153,234,108	0,3261,24344,29983	circRNA	PARPBP	NM_001319995	2,3,4,5	chr12:102514064-102517663|chr12:102547754-102558215
chr12:102542007-102559661	0	3	0	1	0	0	chr12	102542007	102559661	+	5	234,231,108,171,155	0,3340,5639,16208,17499	circRNA	PARPBP	NM_001319988	3,4,5,6,7	chr12:102517819-102542007|chr12:102559661-102569260
chr12:1025509-1036429	0	2	0	0	0	0	chr12	1025509	1036429	-	4	140,182,76,119	0,295,9106,10801	circRNA	RAD52	NM_001297421	7,6,5,4	chr12:1023698-1025509|chr12:1036429-1038984
chr12:102569260-102576405	0	0	2	0	0	0	chr12	102569260	102576405	+	3	184,179,79	0,3109,7066	circRNA	PARPBP	NM_001319988	8,9,10	chr12:102559661-102569260|chr12:102576405-102589089
chr12:1034615-1039310	0	0	0	0	2	0	chr12	1034615	1039310	-	4	76,119,68,94	0,1695,4369,4601	circRNA	RAD52	NM_001297421	5,4,3,2	chr12:1025986-1034615|chr12:1039310-1058767
chr12:104370695-104374740	0	0	0	1	1	2	chr12	104370695	104374740	+	3	143,242,70	0,2913,3975	circRNA	TDG	ENST00000392872	2,3,4	chr12:104359838-104370695|chr12:104374740-104376576
chr12:104373608-104374740	0	2	0	1	4	0	chr12	104373608	104374740	+	2	242.7	0.1062	circRNA	TDG	ENST00000392872	3.4	chr12:104370838-104373608|chr12:104374740-104376576
chr12:104376576-104379506	0	0	3	1	1	1	chr12	104376576	104379506	+	5	136,83,95,172,126	0,337,496,1950,2804	circRNA	TDG	ENST00000392872	5,6,7,8,9	chr12:104374740-104376576|chr12:104379506-104380725
chr12:104378526-104379506	0	0	0	2	0	0	chr12	104378526	104379506	+	2	172.126	0.854	circRNA	TDG	ENST00000392872	8.9	chr12:104377167-104378526|chr12:104379506-104380725
chr12:104514177-104517201	0	0	2	2	1	1	chr12	104514177	104517201	-	3	80,82,198	0,840,2826	circRNA	NFYB	ENST00000240055	7,6,5	chr12:104513547-104514177|chr12:104517201-104519891
chr12:104514177-104522295	0	0	0	1	0	2	chr12	104514177	104522295	-	5	80,82,198,131,94	0,840,2826,5714,8024	circRNA	NFYB	ENST00000240055	7,6,5,4,3	chr12:104513547-104514177|chr12:104522295-104529225
chr12:105543392-105556623	1	0	1	0	2	0	chr12	105543392	105556623	+	6	135,109,67,87,148,97	0,2728,7111,7621,10386,13134	circRNA	KIAA1033	uc001tld.3	25,26,27,28,29,30	chr12:105540924-105543392|chr12:105556623-105557888
chr12:105550503-105556623	0	0	0	0	2	0	chr12	105550503	105556623	+	4	67,87,148,97	0,510,3275,6023	circRNA	KIAA1033	uc001tld.3	27,28,29,30	chr12:105546229-105550503|chr12:105556623-105557888
chr12:107219503-107254190	0	1	1	3	1	2	chr12	107219503	107254190	+	5	95,229,96,145,145	0,16863,18126,25724,34542	circRNA	RIC8B	NM_001351361	5,6,7,8,9	chr12:107209082-107219503|chr12:107254190-107264600
chr12:107236366-107237725	0	2	1	4	1	3	chr12	107236366	107237725	+	2	229.96	0.1263	circRNA	RIC8B	NM_001351361	6.7	chr12:107219598-107236366|chr12:107237725-107245227
chr12:108136973-108140201	1	2	4	4	1	3	chr12	108136973	108140201	-	3	86,119,150	0,1346,3078	circRNA	PRDM4	NM_012406	8,7,6	chr12:108136125-108136973|chr12:108140201-108145191
chr12:108936803-108942990	0	0	0	1	4	0	chr12	108936803	108942990	-	5	125,52,185,105,127	0,1399,2111,4859,6060	circRNA	SART3	NM_014706	6,5,4,3,2	chr12:108932865-108936803|chr12:108942990-108954618
chr12:108938914-108942990	0	1	0	4	3	6	chr12	108938914	108942990	-	3	185,105,127	0,2748,3949	circRNA	SART3	NM_014706	4,3,2	chr12:108938254-108938914|chr12:108942990-108954618
chr12:109046047-109048186	23	73	73	160	219	131	chr12	109046047	109048186	-	2	146.105	0.2034	circRNA	CORO1C	NM_001105237	8.7	chr12:109042796-109046047|chr12:109048186-109051079
chr12:109046047-109055934	0	0	0	2	4	4	chr12	109046047	109055934	-	5	146,105,120,182,130	0,2034,5032,6466,9757	circRNA	CORO1C	NM_001105237	8,7,6,5,4	chr12:109042796-109046047|chr12:109055934-109072047
chr12:109046047-109095099	0	0	2	4	2	2	chr12	109046047	109095099	-	7	146,105,120,182,130,123,200	0,2034,5032,6466,9757,26000,48852	circRNA	CORO1C	NM_001105237	8,7,6,5,4,3,2	chr12:109042796-109046047|chr12:109095099-109096571
chr12:109051079-109055934	0	1	1	0	2	0	chr12	109051079	109055934	-	3	120,182,130	0,1434,4725	circRNA	CORO1C	NM_001105237	6,5,4	chr12:109048186-109051079|chr12:109055934-109072047
chr12:109051079-109095099	0	1	0	0	1	3	chr12	109051079	109095099	-	5	120,182,130,123,200	0,1434,4725,20968,43820	circRNA	CORO1C	NM_001105237	6,5,4,3,2	chr12:109048186-109051079|chr12:109095099-109096571
chr12:109052513-109055934	3	2	1	8	11	8	chr12	109052513	109055934	-	2	182.13	0.3291	circRNA	CORO1C	NM_001105237	5.4	chr12:109051199-109052513|chr12:109055934-109072047
chr12:109052513-109095099	0	1	2	0	0	0	chr12	109052513	109095099	-	4	182,130,123,200	0,3291,19534,42386	circRNA	CORO1C	NM_001105237	5,4,3,2	chr12:109051199-109052513|chr12:109095099-109096571
chr12:109072047-109095099	2	2	4	7	8	5	chr12	109072047	109095099	-	2	123.2	0.22852	circRNA	CORO1C	NM_001105237	3.2	chr12:109055934-109072047|chr12:109095099-109096571
chr12:109094899-109095099	0	2	0	1	3	2	chr12	109094899	109095099	-	1	200	0	circRNA	CORO1C	NM_001105237	2	chr12:109072170-109094899|chr12:109095099-109096571
chr12:109210813-109217137	0	1	1	1	1	5	chr12	109210813	109217137	-	3	122,65,104	0,1211,6220	circRNA	SSH1	ENST00000360239	5,4,3	chr12:109205104-109210813|chr12:109217137-109246413
chr12:109509416-109511337	0	0	0	4	3	3	chr12	109509416	109511337	+	3	99,46,95	0,693,1826	circRNA	USP30	ENST00000392784	8,9,10	chr12:109505432-109509416|chr12:109511337-109519138
chr12:109540643-109541416	0	0	1	0	0	2	chr12	109540643	109541416	+	2	89.179	0.594	circRNA	UNG	ENST00000242576	5.6	chr12:109539804-109540643|chr12:109541416-109547633
chr12:109919441-109921786	0	0	1	0	1	3	chr12	109919441	109921786	+	3	106,182,121	0,1894,2224	circRNA	UBE3B	ENST00000434735	2,3,4	chr12:109915569-109919441|chr12:109921786-109923816
chr12:110371826-110377052	1	0	0	2	0	0	chr12	110371826	110377052	-	3	64,189,83	0,4358,5143	circRNA	GIT2	NM_001135213	18,17,16	chr12:110370995-110371826|chr12:110377052-110385060
chr12:110376184-110377052	0	0	4	1	1	4	chr12	110376184	110377052	-	2	189.83	0.785	circRNA	GIT2	NM_001135213	17.16	chr12:110371890-110376184|chr12:110377052-110385060
chr12:110385060-110385309	0	0	0	3	0	0	chr12	110385060	110385309	-	1	249	0	circRNA	GIT2	NM_001135213	15	chr12:110377052-110385060|chr12:110385309-110390896
chr12:110418756-110421499	0	0	1	2	3	0	chr12	110418756	110421499	-	3	95,131,87	0,2421,2656	circRNA	GIT2	NM_001135213	7,6,5	chr12:110405308-110418756|chr12:110421499-110426767
chr12:110450929-110467440	0	0	0	1	3	1	chr12	110450929	110467440	+	9	125,46,144,190,194,82,62,131,158	0,3263,5220,6014,7983,12617,14580,15387,16353	circRNA	ANKRD13A	ENST00000553025	3,4,5,6,7,8,9,10,11	chr12:110449942-110450929|chr12:110467440-110468449
chr12:110729824-110734542	0	2	0	3	2	1	chr12	110729824	110734542	+	2	105.139	0.4579	circRNA	ATP2A2	ENST00000308664	4.5	chr12:110720600-110729824|chr12:110734542-110760796
chr12:110778463-110780253	0	2	3	2	2	3	chr12	110778463	110780253	+	2	336.221	0.1569	circRNA	ATP2A2	ENST00000308664	14.15	chr12:110777526-110778463|chr12:110780253-110781036
chr12:110819556-110834257	1	2	1	0	1	2	chr12	110819556	110834257	-	7	197,118,143,154,112,120,187	0,1091,4575,5987,6760,13349,14514	circRNA	ANAPC7	ENST00000455511	8,7,6,5,4,3,2	chr12:110815422-110819556|chr12:110834257-110841331
chr12:110820647-110834257	2	0	0	0	2	1	chr12	110820647	110834257	-	6	118,143,154,112,120,187	0,3484,4896,5669,12258,13423	circRNA	ANAPC7	ENST00000455511	7,6,5,4,3,2	chr12:110819753-110820647|chr12:110834257-110841331
chr12:110825543-110826428	0	0	0	0	2	0	chr12	110825543	110826428	-	2	154.112	0.773	circRNA	ANAPC7	ENST00000455511	5.4	chr12:110824274-110825543|chr12:110826428-110832905
chr12:110826316-110834257	1	0	2	1	2	0	chr12	110826316	110834257	-	3	112,120,187	0,6589,7754	circRNA	ANAPC7	ENST00000455511	4,3,2	chr12:110825697-110826316|chr12:110834257-110841331
chr12:110832905-110834257	0	0	0	2	1	0	chr12	110832905	110834257	-	2	120.187	0.1165	circRNA	ANAPC7	ENST00000455511	3.2	chr12:110826428-110832905|chr12:110834257-110841331
chr12:110893390-110895439	0	4	2	7	2	4	chr12	110893390	110895439	-	3	97,116,125	0,229,1924	circRNA	GPN3	ENST00000228827	6,5,4	chr12:110891676-110893390|chr12:110895439-110897499
chr12:110922882-110925748	3	10	6	5	4	8	chr12	110922882	110925748	+	4	122,130,184,83	0,1247,1456,2783	circRNA	FAM216A	ENST00000377673	3,4,5,6	chr12:110910923-110922882|chr12:110925748-110927823
chr12:110924129-110925748	0	0	0	0	2	0	chr12	110924129	110925748	+	3	130,184,83	0,209,1536	circRNA	FAM216A	ENST00000377673	4,5,6	chr12:110923004-110924129|chr12:110925748-110927823
chr12:110941610-110944498	2	0	1	0	1	0	chr12	110941610	110944498	+	3	71,156,115	0,1811,2773	circRNA	RAD9B	ENST00000433301	2,3,4	chr12:110939535-110941610|chr12:110944498-110952854
chr12:11126253-11199787	4	0	0	1	2	2	chr12	11126253	11199787	-	3	67,104,169	0,61127,73365	circRNA	PRR4	ENST00000536668	4,3,2	chr12:11036874-11126253|chr12:11199787-11324020
chr12:111855922-111856681	2	8	10	17	18	11	chr12	111855922	111856681	+	1	759	0	circRNA	SH2B3	ENST00000341259	2	chr12:111844081-111855922|chr12:111856681-111884556
chr12:111923068-111924628	0	0	1	1	4	3	chr12	111923068	111924628	-	3	67,153,64	0,448,1496	circRNA	ATXN2	ENST00000389154	4,3,2	chr12:111908546-111923068|chr12:111924628-111926279
chr12:111923074-111924628	0	1	1	4	0	1	chr12	111923074	111924628	-	3	61,153,64	0,442,1490	circRNA	ATXN2	ENST00000608853	18,17,16	chr12:111908546-111923074|chr12:111924628-111926279
chr12:111947352-111948386	1	1	0	3	7	5	chr12	111947352	111948386	-	3	71,108,198	0,342,836	circRNA	ATXN2	ENST00000389153	14,13,12	chr12:111926584-111947352|chr12:111948386-111951160
chr12:111947352-111951343	1	0	0	1	1	3	chr12	111947352	111951343	-	4	71,108,198,183	0,342,836,3808	circRNA	ATXN2	ENST00000389153	14,13,12,11	chr12:111926584-111947352|chr12:111951343-111953957
chr12:111947352-111957880	0	0	0	0	4	0	chr12	111947352	111957880	-	7	71,108,198,183,210,179,198	0,342,836,3808,6605,8700,10330	circRNA	ATXN2	ENST00000389153	14,13,12,11,10,9,8	chr12:111926584-111947352|chr12:111957880-111958685
chr12:111947352-111963120	0	0	0	4	0	0	chr12	111947352	111963120	-	9	71,108,198,183,210,179,198,92,125	0,342,836,3808,6605,8700,10330,11333,15643	circRNA	ATXN2	ENST00000389153	14,13,12,11,10,9,8,7,6	chr12:111926584-111947352|chr12:111963120-111990083
chr12:111951160-111957880	0	1	5	1	0	3	chr12	111951160	111957880	-	4	183,210,179,198	0,2797,4892,6522	circRNA	ATXN2	ENST00000389153	11,10,9,8	chr12:111948386-111951160|chr12:111957880-111958685
chr12:111958685-111990781	0	0	0	0	1	2	chr12	111958685	111990781	-	4	92,125,151,72	0,4310,31398,32024	circRNA	ATXN2	ENST00000389153	7,6,5,4	chr12:111957880-111958685|chr12:111990781-111991961
chr12:111962995-111990781	0	0	2	3	4	2	chr12	111962995	111990781	-	3	125,151,72	0,27088,27714	circRNA	ATXN2	ENST00000389153	6,5,4	chr12:111958777-111962995|chr12:111990781-111991961
chr12:111962995-111993723	0	0	4	0	2	1	chr12	111962995	111993723	-	5	125,151,72,60,37	0,27088,27714,28966,30691	circRNA	ATXN2	ENST00000389153	6,5,4,3,2	chr12:111958777-111962995|chr12:111993723-112036587
chr12:111990083-111990781	0	3	4	0	12	7	chr12	111990083	111990781	-	2	151.72	0.626	circRNA	ATXN2	ENST00000389153	5.4	chr12:111963120-111990083|chr12:111990781-111991961
chr12:111990083-111993723	1	12	24	19	31	37	chr12	111990083	111993723	-	4	151,72,60,37	0,626,1878,3603	circRNA	ATXN2	ENST00000389153	5,4,3,2	chr12:111963120-111990083|chr12:111993723-112036587
chr12:111991961-111993723	0	0	3	1	2	6	chr12	111991961	111993723	-	2	60.37	0.1725	circRNA	ATXN2	ENST00000389153	3.2	chr12:111990781-111991961|chr12:111993723-112036587
chr12:112087742-112098479	2	1	1	1	1	2	chr12	112087742	112098479	-	5	104,90,110,139,76	0,5627,8797,9268,10661	circRNA	BRAP	uc010syh.2	8,7,6,5,4	chr12:112082366-112087742|chr12:112098479-112103442
chr12:112093369-112098479	1	1	1	0	2	0	chr12	112093369	112098479	-	4	90,110,139,76	0,3170,3641,5034	circRNA	BRAP	uc010syh.2	7,6,5,4	chr12:112087846-112093369|chr12:112098479-112103442
chr12:112096539-112097149	0	0	1	3	4	4	chr12	112096539	112097149	-	2	110.139	0.471	circRNA	BRAP	uc010syh.2	6.5	chr12:112093459-112096539|chr12:112097149-112098403
chr12:112096539-112117144	1	4	0	5	4	3	chr12	112096539	112117144	-	5	110,139,76,149,190	0,471,1864,6903,20415	circRNA	BRAP	uc010syh.2	6,5,4,3,2	chr12:112093459-112096539|chr12:112117144-112119440
chr12:112116954-112121111	1	0	0	2	6	3	chr12	112116954	112121111	-	3	190,199,162	0,2486,3995	circRNA	BRAP	uc009zvv.3	4,3,2	chr12:112110578-112116954|chr12:112121111-112123391
chr12:112303053-112308984	1	1	1	1	4	1	chr12	112303053	112308984	+	6	74,76,98,109,90,96	0,906,2322,3503,5021,5835	circRNA	MAPKAPK5	ENST00000550735	2,3,4,5,6,7	chr12:112280573-112303053|chr12:112308984-112318250
chr12:112321384-112321572	0	0	3	1	2	4	chr12	112321384	112321572	+	1	188	0	circRNA	MAPKAPK5	ENST00000550735	9	chr12:112318331-112321384|chr12:112321572-112323719
chr12:112370389-112381173	0	0	0	0	2	1	chr12	112370389	112381173	-	6	74,145,139,84,50,105	0,1300,4106,4574,5575,10679	circRNA	TMEM116	ENST00000550831	9,8,7,6,5,4	chr12:112369631-112370389|chr12:112381173-112429561
chr12:112371689-112381173	0	0	2	3	0	7	chr12	112371689	112381173	-	5	145,139,84,50,105	0,2806,3274,4275,9379	circRNA	TMEM116	ENST00000550831	8,7,6,5,4	chr12:112370463-112371689|chr12:112381173-112429561
chr12:112485468-112487415	0	0	0	0	0	3	chr12	112485468	112487415	-	3	126,152,129	0,627,1818	circRNA	NAA25	uc001ttn.4	17,16,15	chr12:112481672-112485468|chr12:112487415-112491361
chr12:112498073-112499192	1	0	3	0	0	1	chr12	112498073	112499192	-	2	90.208	0.911	circRNA	NAA25	NM_024953	13.12	chr12:112492372-112498073|chr12:112499192-112506683
chr12:112506683-112516545	0	0	2	0	1	0	chr12	112506683	112516545	-	6	113,170,90,112,79,108	0,3015,5795,6798,9308,9754	circRNA	NAA25	NM_024953	11,10,9,8,7,6	chr12:112499192-112506683|chr12:112516545-112518863
chr12:112509698-112516545	0	0	0	0	0	3	chr12	112509698	112516545	-	5	170,90,112,79,108	0,2780,3783,6293,6739	circRNA	NAA25	NM_024953	10,9,8,7,6	chr12:112506796-112509698|chr12:112516545-112518863
chr12:112513481-112516545	1	10	16	5	11	5	chr12	112513481	112516545	-	3	112,79,108	0,2510,2956	circRNA	NAA25	NM_024953	8,7,6	chr12:112512568-112513481|chr12:112516545-112518863
chr12:112513481-112530940	0	0	0	0	0	2	chr12	112513481	112530940	-	7	112,79,108,75,119,139,86	0,2510,2956,5382,12005,15048,17373	circRNA	NAA25	NM_024953	8,7,6,5,4,3,2	chr12:112512568-112513481|chr12:112530940-112546519
chr12:112518863-112530940	0	0	0	3	0	1	chr12	112518863	112530940	-	4	75,119,139,86	0,6623,9666,11991	circRNA	NAA25	NM_024953	5,4,3,2	chr12:112516545-112518863|chr12:112530940-112546519
chr12:112568314-112583466	0	2	1	0	2	1	chr12	112568314	112583466	+	6	59,136,54,406,207,77	0,4227,4502,10308,11578,15075	circRNA	TRAFD1	ENST00000412615	2,3,4,5,6,7	chr12:112563422-112568314|chr12:112583466-112585877
chr12:112638441-112642427	0	0	1	1	2	0	chr12	112638441	112642427	-	3	161,137,138	0,2998,3848	circRNA	HECTD4	ENST00000377560	54,53,52	chr12:112632870-112638441|chr12:112642427-112645677
chr12:112641439-112642427	3	1	1	3	3	2	chr12	112641439	112642427	-	2	137.138	0.85	circRNA	HECTD4	ENST00000377560	53.52	chr12:112638602-112641439|chr12:112642427-112645677
chr12:112641439-112666615	0	0	2	2	3	1	chr12	112641439	112666615	-	13	137,138,127,137,238,164,80,149,162,104,116,170,165	0,850,4238,4858,6379,8851,12656,13137,13398,15750,23007,24453,25011	circRNA	HECTD4	ENST00000377560	53,52,51,50,49,48,47,46,45,44,43,42,41	chr12:112638602-112641439|chr12:112666615-112667501
chr12:112645677-112646434	0	0	0	0	2	1	chr12	112645677	112646434	-	2	127.137	0.62	circRNA	HECTD4	ENST00000377560	51.5	chr12:112642427-112645677|chr12:112646434-112647818
chr12:112645677-112657293	0	2	1	0	0	2	chr12	112645677	112657293	-	8	127,137,238,164,80,149,162,104	0,620,2141,4613,8418,8899,9160,11512	circRNA	HECTD4	ENST00000377560	51,50,49,48,47,46,45,44	chr12:112642427-112645677|chr12:112657293-112664446
chr12:112667501-112669519	0	1	1	2	1	0	chr12	112667501	112669519	-	3	183,136,203	0,989,1815	circRNA	HECTD4	ENST00000377560	40,39,38	chr12:112666615-112667501|chr12:112669519-112670807
chr12:112676855-112677831	0	2	3	0	6	3	chr12	112676855	112677831	-	2	185.147	0.829	circRNA	HECTD4	ENST00000377560	33.32	chr12:112674902-112676855|chr12:112677831-112681156
chr12:112684704-112690332	0	0	0	0	0	2	chr12	112684704	112690332	-	7	176,89,105,193,234,164,105	0,561,1166,1419,3243,4070,5523	circRNA	HECTD4	ENST00000550722	29,28,27,26,25,24,23	chr12:112681813-112684704|chr12:112690332-112691846
chr12:112696299-112702016	0	0	0	0	0	2	chr12	112696299	112702016	-	4	101,154,125,129	0,616,2809,5588	circRNA	HECTD4	ENST00000377560	19,18,17,16	chr12:112694322-112696299|chr12:112702016-112702978
chr12:112707507-112712764	0	0	2	1	0	2	chr12	112707507	112712764	-	4	146,233,141,114	0,523,3951,5143	circRNA	HECTD4	NM_001109662	13,12,11,10	chr12:112704786-112707507|chr12:112712764-112717031
chr12:112743867-112752350	0	0	2	0	0	0	chr12	112743867	112752350	-	5	171,139,109,131,90	0,2689,3497,6953,8393	circRNA	HECTD4	ENST00000377560	7,6,5,4,3	chr12:112721106-112743867|chr12:112752350-112757028
chr12:112743867-112757546	0	2	0	2	1	0	chr12	112743867	112757546	-	6	171,139,109,131,90,518	0,2689,3497,6953,8393,13161	circRNA	HECTD4	ENST00000377560	7,6,5,4,3,2	chr12:112721106-112743867|chr12:112757546-112819755
chr12:112757028-112757546	4	2	5	6	10	5	chr12	112757028	112757546	-	1	518	0	circRNA	HECTD4	ENST00000377560	2	chr12:112752350-112757028|chr12:112757546-112819755
chr12:112884079-112893867	0	0	1	3	1	2	chr12	112884079	112893867	+	5	123,195,193,117,114	0,4042,6919,8288,9674	circRNA	PTPN11	uc001ttw.1	2,3,4,5,6	chr12:112856929-112884079|chr12:112893867-112910747
chr12:112888121-112893867	0	0	0	2	0	0	chr12	112888121	112893867	+	4	195,193,117,114	0,2877,4246,5632	circRNA	PTPN11	uc001ttw.1	3,4,5,6	chr12:112884202-112888121|chr12:112893867-112910747
chr12:112915454-112915819	0	0	2	1	1	2	chr12	112915454	112915819	+	2	80.159	0.206	circRNA	PTPN11	uc001ttw.1	8.9	chr12:112910844-112915454|chr12:112915819-112919877
chr12:1136913-1137738	3	21	23	40	40	16	chr12	1136913	1137738	+	1	825	0	circRNA	ERC1	ENST00000543086	2	chr12:1100488-1136913|chr12:1137738-1192329
chr12:1136913-1250953	1	2	2	0	3	1	chr12	1136913	1250953	+	6	825,417,75,156,168,168	0,55416,77002,82444,88118,113872	circRNA	ERC1	ENST00000543086	2,3,4,5,6,7	chr12:1100488-1136913|chr12:1250953-1289705
chr12:113754330-113754806	2	0	0	0	0	0	chr12	113754330	113754806	-	2	131.6	0.416	circRNA	SLC8B1	ENST00000552014	11.1	chr12:113753281-113754330|chr12:113754806-113756768
chr12:116434280-116435035	0	0	1	0	1	2	chr12	116434280	116435035	-	2	206.221	0.534	circRNA	MED13L	NM_015335	16.15	chr12:116429762-116434280|chr12:116435035-116440807
chr12:116534473-116549317	8	20	14	11	16	9	chr12	116534473	116549317	-	2	84.85	0.14759	circRNA	MED13L	NM_015335	4.3	chr12:116460406-116534473|chr12:116549317-116675272
chr12:116534473-116675510	1	0	2	5	4	2	chr12	116534473	116675510	-	3	84,85,238	0,14759,140799	circRNA	MED13L	NM_015335	4,3,2	chr12:116460406-116534473|chr12:116675510-116714864
chr12:117365827-117387511	0	3	5	2	3	3	chr12	117365827	117387511	+	3	105,165,89	0,17341,21595	circRNA	FBXW8	ENST00000309909	2,3,4	chr12:117349160-117365827|chr12:117387511-117402501
chr12:117365827-117402659	2	3	4	9	3	1	chr12	117365827	117402659	+	4	105,165,89,158	0,17341,21595,36674	circRNA	FBXW8	ENST00000309909	2,3,4,5	chr12:117349160-117365827|chr12:117402659-117423010
chr12:117402501-117426674	0	1	4	0	0	1	chr12	117402501	117426674	+	3	158,197,207	0,20509,23966	circRNA	FBXW8	ENST00000309909	5,6,7	chr12:117387511-117402501|chr12:117426674-117448127
chr12:117423010-117426674	0	0	0	0	0	2	chr12	117423010	117426674	+	2	197.207	0.3457	circRNA	FBXW8	ENST00000309909	6.7	chr12:117402659-117423010|chr12:117426674-117448127
chr12:117484363-117486963	0	2	1	1	2	2	chr12	117484363	117486963	-	3	108,62,140	0,218,2460	circRNA	TESC	NM_001168325	5,4,3	chr12:117479799-117484363|chr12:117486963-117513075
chr12:118615005-118619412	0	0	2	0	0	0	chr12	118615005	118619412	-	2	129.237	0.417	circRNA	TAOK3	uc001twv.3	3.2	chr12:118610465-118615005|chr12:118619412-118627611
chr12:118619175-118619412	2	2	5	5	5	6	chr12	118619175	118619412	-	1	237	0	circRNA	TAOK3	uc001twv.3	2	chr12:118615134-118619175|chr12:118619412-118627611
chr12:118627611-118639268	0	0	2	1	0	0	chr12	118627611	118639268	-	3	135,207,168	0,9244,11489	circRNA	TAOK3	uc001tww.3	10,9,8	chr12:118619412-118627611|chr12:118639268-118650718
chr12:118671478-118681321	0	2	1	3	2	0	chr12	118671478	118681321	-	5	92,114,97,46,102	0,1884,4399,5553,9741	circRNA	TAOK3	uc001twx.3	9,8,7,6,5	chr12:118651915-118671478|chr12:118681321-118682698
chr12:118671478-118682770	0	0	2	0	0	1	chr12	118671478	118682770	-	6	92,114,97,46,102,72	0,1884,4399,5553,9741,11220	circRNA	TAOK3	uc001twx.3	9,8,7,6,5,4	chr12:118651915-118671478|chr12:118682770-118693252
chr12:118681219-118682770	1	0	1	1	4	0	chr12	118681219	118682770	-	2	102.72	0.1479	circRNA	TAOK3	uc001twx.3	5.4	chr12:118677077-118681219|chr12:118682770-118693252
chr12:118682698-118693460	2	2	5	2	4	5	chr12	118682698	118693460	-	2	72.208	0.10554	circRNA	TAOK3	uc001twx.3	4.3	chr12:118681321-118682698|chr12:118693460-118704459
chr12:11992073-12006495	0	3	0	0	5	2	chr12	11992073	12006495	+	2	165.135	0.14287	circRNA	ETV6	NM_001987	3.4	chr12:11905513-11992073|chr12:12006495-12022357
chr12:120195174-120198859	0	0	0	2	0	0	chr12	120195174	120198859	-	3	175,110,117	0,1220,3568	circRNA	CIT	uc001txh.2	13,12,11	chr12:120190052-120195174|chr12:120198859-120204890
chr12:120213589-120214646	0	0	0	2	1	0	chr12	120213589	120214646	-	3	54,51,171	0,572,886	circRNA	CIT	uc001txh.2	8,7,6	chr12:120210714-120213589|chr12:120214646-120220321
chr12:12022357-12022903	3	5	4	11	10	8	chr12	12022357	12022903	+	1	546	0	circRNA	ETV6	NM_001987	5	chr12:12006495-12022357|chr12:12022903-12037378
chr12:120241009-120263172	0	0	2	0	0	0	chr12	120241009	120263172	-	3	184,154,204	0,19614,21959	circRNA	CIT	ENST00000392521	10,9,8	chr12:120222869-120241009|chr12:120263172-120270574
chr12:120241009-120288079	0	1	1	3	2	1	chr12	120241009	120288079	-	6	184,154,204,94,143,102	0,19614,21959,29565,30880,46968	circRNA	CIT	ENST00000392521	10,9,8,7,6,5	chr12:120222869-120241009|chr12:120288079-120295326
chr12:120260623-120272032	0	0	2	0	0	1	chr12	120260623	120272032	-	4	154,204,94,143	0,2345,9951,11266	circRNA	CIT	ENST00000392521	9,8,7,6	chr12:120241193-120260623|chr12:120272032-120287977
chr12:120260623-120288079	0	1	2	1	1	1	chr12	120260623	120288079	-	5	154,204,94,143,102	0,2345,9951,11266,27354	circRNA	CIT	ENST00000392521	9,8,7,6,5	chr12:120241193-120260623|chr12:120288079-120295326
chr12:120287977-120295502	0	3	0	0	1	3	chr12	120287977	120295502	-	2	102.176	0.7349	circRNA	CIT	ENST00000392521	5.4	chr12:120272032-120287977|chr12:120295502-120306863
chr12:12037378-12038960	1	0	2	0	0	0	chr12	12037378	12038960	+	2	143.101	0.1481	circRNA	ETV6	NM_001987	6.7	chr12:12022903-12037378|chr12:12038960-12043874
chr12:120592773-120593523	10	21	29	28	23	47	chr12	120592773	120593523	-	3	71,190,128	0,271,622	circRNA	GCN1L1	ENST00000300648	31,30,29	chr12:120591713-120592773|chr12:120593523-120594264
chr12:120612964-120614020	0	3	3	1	0	3	chr12	120612964	120614020	-	3	51,129,75	0,584,981	circRNA	GCN1L1	ENST00000300648	12,11,10	chr12:120611973-120612964|chr12:120614020-120615249
chr12:120621371-120622690	0	0	2	0	0	0	chr12	120621371	120622690	-	3	109,132,64	0,543,1255	circRNA	GCN1L1	ENST00000300648	5,4,3	chr12:120616753-120621371|chr12:120622690-120628100
chr12:120990301-120995485	0	0	0	2	0	0	chr12	120990301	120995485	+	4	200,91,185,137	0,2219,4783,5047	circRNA	RNF10	NM_014868	3,4,5,6	chr12:120984404-120990301|chr12:120995485-120998528
chr12:120995084-120995485	3	5	10	9	9	8	chr12	120995084	120995485	+	2	185.137	0.264	circRNA	RNF10	NM_014868	5.6	chr12:120992611-120995084|chr12:120995485-120998528
chr12:120995084-120998689	1	0	2	1	1	3	chr12	120995084	120998689	+	3	185,137,161	0,264,3444	circRNA	RNF10	NM_014868	5,6,7	chr12:120992611-120995084|chr12:120998689-121000747
chr12:121000747-121001746	0	1	2	4	3	2	chr12	121000747	121001746	+	3	126,277,134	0,402,865	circRNA	RNF10	NM_014868	8,9,10	chr12:120998689-121000747|chr12:121001746-121002874
chr12:121002874-121004783	0	0	1	0	2	1	chr12	121002874	121004783	+	3	118,102,156	0,356,1753	circRNA	RNF10	NM_014868	11,12,13	chr12:121001746-121002874|chr12:121004783-121008993
chr12:121220457-121222396	0	3	5	12	12	2	chr12	121220457	121222396	-	3	113,79,120	0,1019,1819	circRNA	SPPL3	NM_139015	6,5,4	chr12:121206862-121220457|chr12:121222396-121229271
chr12:121220457-121248689	1	2	1	2	2	1	chr12	121220457	121248689	-	5	113,79,120,89,78	0,1019,1819,8814,28154	circRNA	SPPL3	NM_139015	6,5,4,3,2	chr12:121206862-121220457|chr12:121248689-121341647
chr12:1213915-1225199	0	2	1	1	1	3	chr12	1213915	1225199	+	3	75,156,168	0,5442,11116	circRNA	ERC1	ENST00000543086	4,5,6	chr12:1192746-1213915|chr12:1225199-1250785
chr12:121773335-121775195	0	1	0	2	1	0	chr12	121773335	121775195	-	2	191.102	0.1758	circRNA	ANAPC5	NM_001330489	7.6	chr12:121769231-121773335|chr12:121775195-121779805
chr12:121773335-121784808	2	0	0	0	3	0	chr12	121773335	121784808	-	5	191,102,67,193,110	0,1758,6470,10306,11363	circRNA	ANAPC5	NM_001330489	7,6,5,4,3	chr12:121769231-121773335|chr12:121784808-121785604
chr12:121840544-121855714	1	0	0	6	3	1	chr12	121840544	121855714	+	3	66,219,408	0,13417,14762	circRNA	RNF34	uc001uak.2	2,3,4	chr12:121838021-121840544|chr12:121855714-121858044
chr12:121853961-121855714	0	1	3	1	5	3	chr12	121853961	121855714	+	2	219.408	0.1345	circRNA	RNF34	ENST00000361234	2.3	chr12:121838021-121853961|chr12:121855714-121858044
chr12:121853961-121861320	0	0	3	1	1	2	chr12	121853961	121861320	+	5	219,408,93,202,132	0,1345,4083,4418,7227	circRNA	RNF34	ENST00000392464	2,3,4,5,6	chr12:121838021-121853961|chr12:121861320-121867833
chr12:121858044-121861320	1	1	2	0	1	1	chr12	121858044	121861320	+	3	93,202,132	0,335,3144	circRNA	RNF34	ENST00000392464	4,5,6	chr12:121855714-121858044|chr12:121861320-121867833
chr12:1219357-1225199	0	1	4	2	1	0	chr12	1219357	1225199	+	2	156.168	0.5674	circRNA	ERC1	ENST00000543086	5.6	chr12:1213990-1219357|chr12:1225199-1250785
chr12:122218777-122219098	2	6	4	10	16	18	chr12	122218777	122219098	-	2	135.11	0.211	circRNA	RHOF	NM_019034	4.3	chr12:122217568-122218777|chr12:122219098-122231057
chr12:1225031-1299218	0	0	3	3	3	2	chr12	1225031	1299218	+	6	168,168,138,141,141,194	0,25754,64674,66059,67415,73993	circRNA	ERC1	ENST00000543086	6,7,8,9,10,11	chr12:1219513-1225031|chr12:1299218-1345934
chr12:122701034-122702944	0	2	2	1	2	0	chr12	122701034	122702944	-	3	97,111,132	0,271,1778	circRNA	DIABLO	NM_001278304	4,3,2	chr12:122693124-122701034|chr12:122702944-122709191
chr12:122720332-122723271	0	0	0	1	2	1	chr12	122720332	122723271	-	2	138.138	0.2801	circRNA	VPS33A	uc001ucc.3	10.9	chr12:122717515-122720332|chr12:122723271-122724424
chr12:122723133-122724492	0	0	0	0	2	0	chr12	122723133	122724492	-	2	138.68	0.1291	circRNA	VPS33A	uc001ucc.3	9.8	chr12:122720470-122723133|chr12:122724492-122726928
chr12:122812493-122812973	0	1	0	0	0	2	chr12	122812493	122812973	-	2	216.166	0.314	circRNA	CLIP1	ENST00000361654	15.14	chr12:122803895-122812493|chr12:122812973-122817533
chr12:122817533-122826244	0	1	2	3	0	0	chr12	122817533	122826244	-	5	157,84,58,117,717	0,1040,1661,3645,7994	circRNA	CLIP1	ENST00000361654	13,12,11,10,9	chr12:122812973-122817533|chr12:122826244-122837272
chr12:122825299-122826244	1	6	6	19	18	10	chr12	122825299	122826244	-	1	945	0	circRNA	CLIP1	ENST00000302528	9	chr12:122821295-122825299|chr12:122826244-122831921
chr12:122837272-122865105	1	0	1	1	2	1	chr12	122837272	122865105	-	7	61,104,198,223,125,572,191	0,1727,2389,8233,11257,24663,27642	circRNA	CLIP1	ENST00000361654	8,7,6,5,4,3,2	chr12:122826244-122837272|chr12:122865105-122907067
chr12:12288108-12340053	0	0	2	0	0	0	chr12	12288108	12340053	-	14	126,210,191,212,203,327,185,227,290,217,172,397,132,197	0,3150,12191,13767,15661,23654,24605,27018,29098,29904,44635,45868,48805,51748	circRNA	LRP6	ENST00000261349	17,16,15,14,13,12,11,10,9,8,7,6,5,4	chr12:12284991-12288108|chr12:12340053-12356136
chr12:122962387-122964858	0	0	0	0	0	2	chr12	122962387	122964858	-	3	118,87,122	0,365,2349	circRNA	ZCCHC8	uc001ucm.3	6,5,4	chr12:122958822-122962387|chr12:122964858-122966068
chr12:122973932-122977336	1	0	0	3	1	1	chr12	122973932	122977336	-	3	78,106,75	0,1076,3329	circRNA	ZCCHC8	uc009zxp.3	4,3,2	chr12:122968110-122973932|chr12:122977336-122983373
chr12:122995655-122999774	0	1	5	3	3	1	chr12	122995655	122999774	-	2	80.123	0.3996	circRNA	RSRC2	uc001uco.3	7.6	chr12:122992997-122995655|chr12:122999774-123001773
chr12:123005931-123007453	0	0	0	2	0	0	chr12	123005931	123007453	-	3	44,157,108	0,758,1414	circRNA	RSRC2	ENST00000527461	4,3,2	chr12:123005128-123005931|chr12:123007453-123011394
chr12:123006689-123007453	0	0	1	2	0	0	chr12	123006689	123007453	-	2	157.108	0.656	circRNA	RSRC2	ENST00000527461	3.2	chr12:123005975-123006689|chr12:123007453-123011394
chr12:123014568-123024301	0	1	0	2	0	5	chr12	123014568	123024301	+	4	171,121,116,79	0,4642,8317,9654	circRNA	KNTC1	ENST00000450485	2,3,4,5	chr12:123011898-123014568|chr12:123024301-123026596
chr12:123028705-123032516	0	0	4	0	0	0	chr12	123028705	123032516	+	5	111,94,53,116,55	0,2017,2463,3256,3756	circRNA	KNTC1	ENST00000333479	8,9,10,11,12	chr12:123028181-123028705|chr12:123032516-123034312
chr12:123030722-123032516	0	1	3	1	4	4	chr12	123030722	123032516	+	4	94,53,116,55	0,446,1239,1739	circRNA	KNTC1	ENST00000450485	8,9,10,11	chr12:123028181-123030722|chr12:123032516-123034312
chr12:123052807-123061576	0	0	3	2	0	1	chr12	123052807	123061576	+	10	112,144,57,102,120,144,99,104,100,135	0,1420,2615,2764,4676,4881,6021,7282,7539,8634	circRNA	KNTC1	ENST00000333479	21,22,23,24,25,26,27,28,29,30	chr12:123047246-123052807|chr12:123061576-123062218
chr12:123054227-123058927	1	1	1	0	1	4	chr12	123054227	123058927	+	6	144,57,102,120,144,99	0,1195,1344,3256,3461,4601	circRNA	KNTC1	ENST00000450485	21,22,23,24,25,26	chr12:123052919-123054227|chr12:123058927-123093930
chr12:123054227-123061576	0	1	2	1	0	2	chr12	123054227	123061576	+	9	144,57,102,120,144,99,104,100,135	0,1195,1344,3256,3461,4601,5862,6119,7214	circRNA	KNTC1	ENST00000333479	22,23,24,25,26,27,28,29,30	chr12:123052919-123054227|chr12:123061576-123062218
chr12:123062218-123065217	5	7	3	5	7	3	chr12	123062218	123065217	+	3	120,73,68	0,2233,2931	circRNA	KNTC1	ENST00000333479	31,32,33	chr12:123061576-123062218|chr12:123065217-123067251
chr12:123062218-123067532	0	3	5	1	0	1	chr12	123062218	123067532	+	4	120,73,68,281	0,2233,2931,5033	circRNA	KNTC1	ENST00000333479	31,32,33,34	chr12:123061576-123062218|chr12:123067532-123068824
chr12:123064451-123067532	0	5	1	2	1	1	chr12	123064451	123067532	+	3	73,68,281	0,698,2800	circRNA	KNTC1	ENST00000333479	32,33,34	chr12:123062338-123064451|chr12:123067532-123068824
chr12:123068824-123069537	1	3	1	0	0	0	chr12	123068824	123069537	+	2	173.98	0.615	circRNA	KNTC1	ENST00000333479	35.36	chr12:123067532-123068824|chr12:123069537-123070182
chr12:123068824-123073363	0	1	0	2	1	0	chr12	123068824	123073363	+	6	173,98,139,57,164,105	0,615,1358,2423,3433,4434	circRNA	KNTC1	ENST00000333479	35,36,37,38,39,40	chr12:123067532-123068824|chr12:123073363-123075153
chr12:123068824-123089962	0	2	0	0	0	0	chr12	123068824	123089962	+	17	173,98,139,57,164,105,129,117,110,208,90,172,59,217,74,211,110	0,615,1358,2423,3433,4434,6329,7059,9998,13453,17258,18291,18551,18749,20286,20599,21028	circRNA	KNTC1	ENST00000333479	35,36,37,38,39,40,41,42,43,44,45,46,47,48,49,50,51	chr12:123067532-123068824|chr12:123089962-123093930
chr12:123078822-123109235	0	1	2	2	2	1	chr12	123078822	123109235	+	21	110,208,90,172,59,217,74,211,110,47,79,119,136,96,57,55,64,130,90,146,91	0,3455,7260,8293,8553,8751,10288,10601,11030,15108,16546,18836,19350,20715,21194,24067,24206,26203,27605,28186,30322	circRNA	KNTC1	ENST00000333479	43,44,45,46,47,48,49,50,51,52,53,54,55,56,57,58,59,60,61,62,63	chr12:123076000-123078822|chr12:123109235-123110751
chr12:12311762-12318229	0	1	0	0	2	0	chr12	12311762	12318229	-	5	327,185,227,290,217	0,951,3364,5444,6250	circRNA	LRP6	ENST00000261349	12,11,10,9,8	chr12:12303972-12311762|chr12:12318229-12332743
chr12:123262037-123265877	0	0	2	2	0	6	chr12	123262037	123265877	+	2	193.167	0.3673	circRNA	CCDC62	ENST00000253079	2.3	chr12:123259253-123262037|chr12:123265877-123270265
chr12:123262037-123282747	0	2	0	0	0	2	chr12	123262037	123282747	+	7	193,167,102,172,102,89,116	0,3673,8228,11267,14529,19816,20594	circRNA	CCDC62	ENST00000253079	2,3,4,5,6,7,8	chr12:123259253-123262037|chr12:123282747-123285670
chr12:123416738-123419978	0	0	1	2	1	0	chr12	123416738	123419978	-	2	137.16	0.308	circRNA	ABCB9	ENST00000344275	11.1	chr12:123405590-123416738|chr12:123419978-123424657
chr12:123488940-123490095	0	2	0	5	0	3	chr12	123488940	123490095	-	2	96.309	0.846	circRNA	PITPNM2	ENST00000320201	7.6	chr12:123485705-123488940|chr12:123490095-123494396
chr12:123497159-123498589	1	1	0	2	6	2	chr12	123497159	123498589	-	2	122.215	0.1215	circRNA	PITPNM2	ENST00000320201	4.3	chr12:123494624-123497159|chr12:123498589-123519059
chr12:123645327-123665757	0	0	1	3	4	3	chr12	123645327	123665757	-	10	69,248,104,121,141,176,135,102,65,48	0,355,1334,2233,3169,4521,5874,15907,19145,20382	circRNA	MPHOSPH9	ENST00000302349	19,18,17,16,15,14,13,12,11,10	chr12:123637172-123645327|chr12:123665757-123678932
chr12:123645327-123687922	0	1	4	5	6	3	chr12	123645327	123687922	-	15	69,248,104,121,141,176,135,102,65,48,216,88,156,461,126	0,355,1334,2233,3169,4521,5874,15907,19145,20382,33605,37466,41383,41843,42469	circRNA	MPHOSPH9	ENST00000302349	19,18,17,16,15,14,13,12,11,10,9,8,7,6,5	chr12:123637172-123645327|chr12:123687922-123694602
chr12:123651201-123665757	0	3	8	4	4	4	chr12	123651201	123665757	-	4	135,102,65,48	0,10033,13271,14508	circRNA	MPHOSPH9	ENST00000302349	13,12,11,10	chr12:123650024-123651201|chr12:123665757-123678932
chr12:123661234-123682881	1	1	3	3	0	3	chr12	123661234	123682881	-	5	102,65,48,216,88	0,3238,4475,17698,21559	circRNA	MPHOSPH9	ENST00000302349	12,11,10,9,8	chr12:123651336-123661234|chr12:123682881-123686710
chr12:123678932-123682881	0	0	6	3	2	0	chr12	123678932	123682881	-	2	216.88	0.3861	circRNA	MPHOSPH9	ENST00000302349	9.8	chr12:123665757-123678932|chr12:123682881-123686710
chr12:123678932-123707674	0	0	2	1	0	0	chr12	123678932	123707674	-	10	216,88,156,461,126,107,91,124,524,90	0,3861,7778,8238,8864,15670,20358,23990,26986,28652	circRNA	MPHOSPH9	ENST00000606320	13,12,11,10,9,8,7,6,5,4	chr12:123665757-123678932|chr12:123707674-123712009
chr12:123678932-123712163	0	0	1	0	2	2	chr12	123678932	123712163	-	10	216,88,156,461,126,107,91,124,524,154	0,3861,7778,8238,8864,15670,20358,23990,26986,33077	circRNA	MPHOSPH9	ENST00000541076	11,10,9,8,7,6,5,4,3,2	chr12:123665757-123678932|chr12:123712163-123714807
chr12:123694602-123707674	2	3	3	3	3	0	chr12	123694602	123707674	-	5	107,91,124,524,90	0,4688,8320,11316,12982	circRNA	MPHOSPH9	ENST00000606320	8,7,6,5,4	chr12:123687922-123694602|chr12:123707674-123712009
chr12:123798166-123800207	2	1	1	0	1	0	chr12	123798166	123800207	-	3	100,72,113	0,1753,1928	circRNA	SBNO1	ENST00000267176	23,22,21	chr12:123795676-123798166|chr12:123800207-123801767
chr12:123825534-123830114	1	0	0	2	0	1	chr12	123825534	123830114	-	2	101.31	0.427	circRNA	SBNO1	ENST00000267176	4.3	chr12:123821038-123825534|chr12:123830114-123832575
chr12:123829804-123834988	0	1	0	3	7	5	chr12	123829804	123834988	-	3	313,105,132	0,2771,5052	circRNA	SBNO1	NM_001167856	4,3,2	chr12:123825635-123829804|chr12:123834988-123849247
chr12:123832575-123834988	0	1	0	2	3	2	chr12	123832575	123834988	-	2	105.132	0.2281	circRNA	SBNO1	NM_001167856	3.2	chr12:123830117-123832575|chr12:123834988-123849247
chr12:123907590-123915206	0	4	1	4	5	1	chr12	123907590	123915206	-	2	114.152	0.7464	circRNA	RILPL2	NM_145058	3.2	chr12:123900468-123907590|chr12:123915206-123920628
chr12:12397195-12397589	2	6	7	5	10	10	chr12	12397195	12397589	-	1	394	0	circRNA	LRP6	ENST00000261349	2	chr12:12356334-12397195|chr12:12397589-12419614
chr12:123983090-123984083	0	1	1	1	0	2	chr12	123983090	123984083	-	2	222.119	0.874	circRNA	RILPL1	NM_001319244	4.3	chr12:123970352-123983090|chr12:123984083-124002928
chr12:124071293-124074996	2	9	18	17	16	17	chr12	124071293	124074996	+	2	193.108	0.3595	circRNA	TMED2	NM_006815	2.3	chr12:124069363-124071293|chr12:124074996-124081151
chr12:124102304-124103384	0	2	2	1	3	1	chr12	124102304	124103384	+	2	115.169	0.911	circRNA	DDX55	ENST00000542286	9.1	chr12:124101150-124102304|chr12:124103384-124103994
chr12:124123810-124137282	0	1	1	4	1	0	chr12	124123810	124137282	+	6	80,107,164,63,30,29	0,6191,8699,11730,13268,13443	circRNA	GTF2H3	NM_001271866	2,3,4,5,6,7	chr12:124118419-124123810|chr12:124137282-124144062
chr12:124130001-124137282	0	1	1	0	2	1	chr12	124130001	124137282	+	5	107,164,63,30,29	0,2508,5539,7077,7252	circRNA	GTF2H3	NM_001271866	3,4,5,6,7	chr12:124123890-124130001|chr12:124137282-124144062
chr12:124158161-124163836	0	1	0	0	0	2	chr12	124158161	124163836	+	2	196.101	0.5574	circRNA	TCTN2	ENST00000303372	4.5	chr12:124156679-124158161|chr12:124163836-124171382
chr12:124203169-124209338	1	8	3	5	6	2	chr12	124203169	124209338	+	3	79,98,138	0,3728,6031	circRNA	ATP6V0A2	uc001ufq.1	2,3,4	chr12:124197229-124203169|chr12:124209338-124210743
chr12:124203169-124212456	1	2	1	4	3	1	chr12	124203169	124212456	+	5	79,98,138,89,127	0,3728,6031,7574,9160	circRNA	ATP6V0A2	uc001ufq.1	2,3,4,5,6	chr12:124197229-124203169|chr12:124212456-124218472
chr12:124203169-124221818	0	2	3	0	2	1	chr12	124203169	124221818	+	8	79,98,138,89,127,83,94,213	0,3728,6031,7574,9160,15303,16908,18436	circRNA	ATP6V0A2	NM_012463	2,3,4,5,6,7,8,9	chr12:124197229-124203169|chr12:124221818-124228331
chr12:124203169-124236949	0	0	2	0	0	0	chr12	124203169	124236949	+	16	79,98,138,89,127,83,94,213,151,137,188,91,119,211,120,120	0,3728,6031,7574,9160,15303,16908,18436,25162,25578,25974,26259,28984,29952,32487,33660	circRNA	ATP6V0A2	NM_012463	2,3,4,5,6,7,8,9,10,11,12,13,14,15,16,17	chr12:124197229-124203169|chr12:124236949-124238966
chr12:124209200-124212456	2	0	0	0	1	0	chr12	124209200	124212456	+	3	138,89,127	0,1543,3129	circRNA	ATP6V0A2	uc001ufq.1	4,5,6	chr12:124206995-124209200|chr12:124212456-124218472
chr12:124210743-124212456	0	3	1	0	2	0	chr12	124210743	124212456	+	2	89.127	0.1586	circRNA	ATP6V0A2	uc001ufq.1	5.6	chr12:124209338-124210743|chr12:124212456-124218472
chr12:124218472-124221818	2	8	9	1	3	2	chr12	124218472	124221818	+	3	83,94,213	0,1605,3133	circRNA	ATP6V0A2	NM_012463	7,8,9	chr12:124212456-124218472|chr12:124221818-124228331
chr12:124220077-124221818	1	0	0	0	2	0	chr12	124220077	124221818	+	2	94.213	0.1528	circRNA	ATP6V0A2	NM_012463	8.9	chr12:124218555-124220077|chr12:124221818-124228331
chr12:124236829-124239084	0	0	1	0	1	2	chr12	124236829	124239084	+	2	120.118	0.2137	circRNA	ATP6V0A2	NM_012463	17.18	chr12:124235776-124236829|chr12:124239084-124241361
chr12:124303496-124305305	0	0	0	2	0	0	chr12	124303496	124305305	+	3	117,103,179	0,198,1630	circRNA	DNAH10	NM_207437	21,22,23	chr12:124298459-124303496|chr12:124305305-124311233
chr12:124856567-124862930	2	4	2	4	7	6	chr12	124856567	124862930	-	2	589.148	0.6215	circRNA	NCOR2	NM_001077261	21.2	chr12:124848345-124856567|chr12:124862930-124870290
chr12:124862782-124941708	0	0	2	0	1	0	chr12	124862782	124941708	-	13	148,143,63,173,158,99,55,179,91,173,67,53,57	0,7508,19882,22264,24167,41720,44264,48385,51376,52378,59693,71578,78869	circRNA	NCOR2	NM_001077261	20,19,18,17,16,15,14,13,12,11,10,9,8	chr12:124857156-124862782|chr12:124941708-124950718
chr12:124870290-124922542	0	0	0	2	0	0	chr12	124870290	124922542	-	10	143,63,173,158,99,55,179,91,173,67	0,12374,14756,16659,34212,36756,40877,43868,44870,52185	circRNA	NCOR2	NM_001077261	19,18,17,16,15,14,13,12,11,10	chr12:124862930-124870290|chr12:124922542-124934360
chr12:124882664-124915333	2	2	1	2	4	2	chr12	124882664	124915333	-	8	63,173,158,99,55,179,91,173	0,2382,4285,21838,24382,28503,31494,32496	circRNA	NCOR2	NM_001077261	18,17,16,15,14,13,12,11	chr12:124870433-124882664|chr12:124915333-124922475
chr12:124882664-124934413	0	0	0	4	0	0	chr12	124882664	124934413	-	10	63,173,158,99,55,179,91,173,67,53	0,2382,4285,21838,24382,28503,31494,32496,39811,51696	circRNA	NCOR2	NM_001077261	18,17,16,15,14,13,12,11,10,9	chr12:124870433-124882664|chr12:124934413-124941651
chr12:124904502-124915333	9	12	20	40	44	37	chr12	124904502	124915333	-	5	99,55,179,91,173	0,2544,6665,9656,10658	circRNA	NCOR2	NM_001077261	15,14,13,12,11	chr12:124887107-124904502|chr12:124915333-124922475
chr12:124904502-124922542	7	10	9	19	19	12	chr12	124904502	124922542	-	6	99,55,179,91,173,67	0,2544,6665,9656,10658,17973	circRNA	NCOR2	NM_001077261	15,14,13,12,11,10	chr12:124887107-124904502|chr12:124922542-124934360
chr12:124904502-124934413	0	1	3	6	7	3	chr12	124904502	124934413	-	7	99,55,179,91,173,67,53	0,2544,6665,9656,10658,17973,29858	circRNA	NCOR2	NM_001077261	15,14,13,12,11,10,9	chr12:124887107-124904502|chr12:124934413-124941651
chr12:124904502-124941708	1	0	1	6	5	1	chr12	124904502	124941708	-	8	99,55,179,91,173,67,53,57	0,2544,6665,9656,10658,17973,29858,37149	circRNA	NCOR2	NM_001077261	15,14,13,12,11,10,9,8	chr12:124887107-124904502|chr12:124941708-124950718
chr12:124911167-124915333	0	1	1	4	4	3	chr12	124911167	124915333	-	3	179,91,173	0,2991,3993	circRNA	NCOR2	NM_001077261	13,12,11	chr12:124907101-124911167|chr12:124915333-124922475
chr12:124911167-124922542	1	1	2	5	3	4	chr12	124911167	124922542	-	4	179,91,173,67	0,2991,3993,11308	circRNA	NCOR2	NM_001077261	13,12,11,10	chr12:124907101-124911167|chr12:124922542-124934360
chr12:124911167-124934413	3	1	4	3	2	3	chr12	124911167	124934413	-	5	179,91,173,67,53	0,2991,3993,11308,23193	circRNA	NCOR2	NM_001077261	13,12,11,10,9	chr12:124907101-124911167|chr12:124934413-124941651
chr12:124911167-124941708	2	3	2	0	1	0	chr12	124911167	124941708	-	6	179,91,173,67,53,57	0,2991,3993,11308,23193,30484	circRNA	NCOR2	NM_001077261	13,12,11,10,9,8	chr12:124907101-124911167|chr12:124941708-124950718
chr12:124922475-124941708	0	0	0	2	3	1	chr12	124922475	124941708	-	3	67,53,57	0,11885,19176	circRNA	NCOR2	NM_001077261	10,9,8	chr12:124915333-124922475|chr12:124941708-124950718
chr12:125296415-125302253	0	1	3	0	0	0	chr12	125296415	125302253	-	4	96,204,142,158	0,2332,3103,5680	circRNA	SCARB1	ENST00000339570	5,4,3,2	chr12:125294835-125296415|chr12:125302253-125348140
chr12:125436943-125438757	0	1	0	5	1	3	chr12	125436943	125438757	-	3	173,117,125	0,1482,1689	circRNA	DHX37	NM_032656	21,20,19	chr12:125435350-125436943|chr12:125438757-125441236
chr12:125587224-125591814	0	2	2	2	5	2	chr12	125587224	125591814	+	3	115,82,148	0,321,4442	circRNA	AACS	NM_001319839	6,7,8	chr12:125576069-125587224|chr12:125591814-125599022
chr12:12653452-12674397	0	0	0	0	2	0	chr12	12653452	12674397	-	3	164,139,593	0,19343,20352	circRNA	DUSP16	NM_030640	4,3,2	chr12:12640121-12653452|chr12:12674397-12715050
chr12:12672795-12674397	0	0	0	0	3	0	chr12	12672795	12674397	-	2	139.593	0.1009	circRNA	DUSP16	NM_030640	3.2	chr12:12653616-12672795|chr12:12674397-12715050
chr12:1289705-1299218	3	1	4	7	1	6	chr12	1289705	1299218	+	4	138,141,141,194	0,1385,2741,9319	circRNA	ERC1	ENST00000543086	8,9,10,11	chr12:1250953-1289705|chr12:1299218-1345934
chr12:129293332-129299615	0	5	2	3	6	11	chr12	129293332	129299615	-	4	169,78,169,296	0,608,1155,5987	circRNA	SLC15A4	ENST00000266771	5,4,3,2	chr12:129285554-129293332|chr12:129299615-129307942
chr12:129299319-129299615	2	7	7	8	15	10	chr12	129299319	129299615	-	1	296	0	circRNA	SLC15A4	ENST00000266771	2	chr12:129294656-129299319|chr12:129299615-129307942
chr12:132209949-132212973	0	0	0	1	0	3	chr12	132209949	132212973	+	3	226,113,136	0,1535,2888	circRNA	SFSWAP	uc001uiz.2	5,6,7	chr12:132204084-132209949|chr12:132212973-132237667
chr12:132237667-132241189	0	1	0	1	3	2	chr12	132237667	132241189	+	4	241,132,94,172	0,1245,2263,3350	circRNA	SFSWAP	NM_001261411	8,9,10,11	chr12:132212973-132237667|chr12:132241189-132249000
chr12:132249000-132262875	0	0	2	0	4	0	chr12	132249000	132262875	+	3	231,191,266	0,1662,13609	circRNA	SFSWAP	NM_001261411	12,13,14	chr12:132241189-132249000|chr12:132262875-132269617
chr12:133083837-133084936	1	0	0	0	2	1	chr12	133083837	133084936	+	2	137.195	0.904	circRNA	FBRSL1	ENST00000542061	2.3	chr12:133083671-133083837|chr12:133084936-133085751
chr12:133084738-133124618	0	1	2	0	0	0	chr12	133084738	133124618	+	4	198,90,36,30	0,17581,19800,39850	circRNA	FBRSL1	ENST00000434748	2,3,4,5	chr12:133067447-133084738|chr12:133124618-133144066
chr12:133233721-133236095	0	1	1	2	1	1	chr12	133233721	133236095	-	4	123,81,103,215	0,213,732,2159	circRNA	POLE	ENST00000320574	29,28,27,26	chr12:133226475-133233721|chr12:133236095-133237554
chr12:133245396-133248908	0	0	0	0	2	2	chr12	133245396	133248908	-	2	129.108	0.3404	circRNA	POLE	ENST00000320574	17.16	chr12:133245323-133245396|chr12:133248908-133249212
chr12:133310970-133312098	1	0	1	3	2	4	chr12	133310970	133312098	-	2	191.107	0.1021	circRNA	ANKLE2	NM_015114	10.9	chr12:133306856-133310970|chr12:133312098-133313478
chr12:133310970-133313651	0	0	2	0	1	1	chr12	133310970	133313651	-	3	191,107,173	0,1021,2508	circRNA	ANKLE2	NM_015114	10,9,8	chr12:133306856-133310970|chr12:133313651-133318004
chr12:133313478-133331719	0	1	2	0	1	0	chr12	133313478	133331719	-	7	173,67,123,189,194,207,459	0,4526,6261,10939,11245,13750,17782	circRNA	ANKLE2	NM_015114	8,7,6,5,4,3,2	chr12:133312098-133313478|chr12:133331719-133338203
chr12:133357383-133360893	0	0	1	2	4	1	chr12	133357383	133360893	-	3	117,198,144	0,1498,3366	circRNA	GOLGA3	ENST00000204726	18,17,16	chr12:133354391-133357383|chr12:133360893-133362924
chr12:133362924-133367879	0	0	0	0	1	2	chr12	133362924	133367879	-	4	217,95,264,78	0,354,2688,4877	circRNA	GOLGA3	ENST00000204726	15,14,13,12	chr12:133360893-133362924|chr12:133367879-133372437
chr12:133372437-133390005	0	0	3	0	0	1	chr12	133372437	133390005	-	8	369,162,138,203,307,112,659,113	0,687,2488,5915,8864,11325,12039,17455	circRNA	GOLGA3	ENST00000204726	11,10,9,8,7,6,5,4	chr12:133367879-133372437|chr12:133390005-133393125
chr12:133374925-133385135	0	0	0	0	0	2	chr12	133374925	133385135	-	5	138,203,307,112,659	0,3427,6376,8837,9551	circRNA	GOLGA3	ENST00000204726	9,8,7,6,5	chr12:133373286-133374925|chr12:133385135-133389892
chr12:133420612-133425310	1	0	2	4	5	5	chr12	133420612	133425310	-	4	108,88,71,84	0,3016,4058,4614	circRNA	CHFR	ENST00000315585	16,15,14,13	chr12:133419669-133420612|chr12:133425310-133428203
chr12:133423628-133438220	0	0	1	0	3	0	chr12	133423628	133438220	-	9	88,71,84,120,143,163,155,160,168	0,1042,1598,4575,6388,9425,10362,12025,14424	circRNA	CHFR	ENST00000315585	15,14,13,12,11,10,9,8,7	chr12:133420720-133423628|chr12:133438220-133438918
chr12:133428203-133430159	2	5	1	0	6	1	chr12	133428203	133430159	-	2	120.143	0.1813	circRNA	CHFR	ENST00000315585	12.11	chr12:133425310-133428203|chr12:133430159-133433053
chr12:133428203-133448980	0	0	0	0	2	0	chr12	133428203	133448980	-	9	120,143,163,155,160,168,93,60,110	0,1813,4850,5787,7450,9849,10715,19106,20667	circRNA	CHFR	ENST00000315585	12,11,10,9,8,7,6,5,4	chr12:133425310-133428203|chr12:133448980-133454140
chr12:133430016-133438220	0	0	2	1	0	0	chr12	133430016	133438220	-	5	143,163,155,160,168	0,3037,3974,5637,8036	circRNA	CHFR	ENST00000315585	11,10,9,8,7	chr12:133428323-133430016|chr12:133438220-133438918
chr12:133438052-133448980	0	0	2	0	0	1	chr12	133438052	133448980	-	4	168,93,60,110	0,866,9257,10818	circRNA	CHFR	ENST00000315585	7,6,5,4	chr12:133435813-133438052|chr12:133448980-133454140
chr12:133447309-133463926	0	0	1	0	6	1	chr12	133447309	133463926	-	4	60,110,100,145	0,1561,6831,16472	circRNA	CHFR	ENST00000315585	5,4,3,2	chr12:133439011-133447309|chr12:133463926-133464132
chr12:133617863-133625434	0	1	2	0	0	1	chr12	133617863	133625434	+	3	205,127,96	0,6677,7475	circRNA	ZNF84	NM_001127372	2,3,4	chr12:133614140-133617863|chr12:133625434-133633539
chr12:133768074-133768589	0	3	1	0	0	2	chr12	133768074	133768589	+	2	127.96	0.419	circRNA	ZNF268	uc010tbv.1	8.9	chr12:133764658-133768074|chr12:133768589-133770013
chr12:1372199-1399178	0	3	0	0	3	1	chr12	1372199	1399178	+	2	132.161	0.26818	circRNA	ERC1	ENST00000543086	13.14	chr12:1346070-1372199|chr12:1399178-1480998
chr12:1399017-1481143	1	2	6	3	3	2	chr12	1399017	1481143	+	2	161.145	0.81981	circRNA	ERC1	ENST00000543086	14.15	chr12:1372331-1399017|chr12:1481143-1517314
chr12:1399017-1553916	1	3	0	0	4	2	chr12	1399017	1553916	+	4	161,145,99,189	0,81981,118297,154710	circRNA	ERC1	ENST00000543086	14,15,16,17	chr12:1372331-1399017|chr12:1553916-1599258
chr12:14576842-14578407	1	9	8	6	15	12	chr12	14576842	14578407	+	1	1565	0	circRNA	ATF7IP	NM_001286515	2	chr12:14518761-14576842|chr12:14578407-14587273
chr12:14576842-14591201	0	0	3	2	0	3	chr12	14576842	14591201	+	4	1565,84,146,138	0,10431,12197,14221	circRNA	ATF7IP	NM_001286515	2,3,4,5	chr12:14518761-14576842|chr12:14591201-14599921
chr12:14576842-14599987	0	0	0	1	4	1	chr12	14576842	14599987	+	5	1565,84,146,138,66	0,10431,12197,14221,23079	circRNA	ATF7IP	NM_001286515	2,3,4,5,6	chr12:14518761-14576842|chr12:14599987-14609494
chr12:14587270-14589185	0	0	0	2	0	0	chr12	14587270	14589185	+	2	87.146	0.1769	circRNA	ATF7IP	NM_018179	3.4	chr12:14578407-14587270|chr12:14589185-14591063
chr12:14587270-14591201	0	0	0	1	5	1	chr12	14587270	14591201	+	3	87,146,138	0,1769,3793	circRNA	ATF7IP	NM_018179	3,4,5	chr12:14578407-14587270|chr12:14591201-14599921
chr12:14599921-14610229	0	0	1	2	0	0	chr12	14599921	14610229	+	3	66,74,89	0,9573,10219	circRNA	ATF7IP	NM_001286515	6,7,8	chr12:14591201-14599921|chr12:14610229-14613428
chr12:16109869-16115881	0	0	0	1	4	0	chr12	16109869	16115881	+	4	98,148,96,135	0,1252,2893,5877	circRNA	DERA	ENST00000428559	2,3,4,5	chr12:16064348-16109869|chr12:16115881-16135241
chr12:1863423-1863680	0	0	2	1	1	1	chr12	1863423	1863680	+	1	257	0	circRNA	ADIPOR2	ENST00000537545	2	chr12:1797883-1863423|chr12:1863680-1882007
chr12:1863423-1882127	0	2	1	3	3	1	chr12	1863423	1882127	+	2	257.12	0.18584	circRNA	ADIPOR2	ENST00000357103	2.3	chr12:1800357-1863423|chr12:1882127-1887019
chr12:1863423-1890242	0	0	2	0	0	0	chr12	1863423	1890242	+	5	257,120,172,187,188	0,18584,23596,26193,26631	circRNA	ADIPOR2	ENST00000357103	2,3,4,5,6	chr12:1800357-1863423|chr12:1890242-1893045
chr12:1863423-1893239	0	3	0	1	1	3	chr12	1863423	1893239	+	6	257,120,172,187,188,194	0,18584,23596,26193,26631,29622	circRNA	ADIPOR2	ENST00000357103	2,3,4,5,6,7	chr12:1800357-1863423|chr12:1893239-1895109
chr12:1882007-1893239	0	0	2	1	2	0	chr12	1882007	1893239	+	5	120,172,187,188,194	0,5012,7609,8047,11038	circRNA	ADIPOR2	ENST00000357103	3,4,5,6,7	chr12:1863680-1882007|chr12:1893239-1895109
chr12:1887019-1893239	0	2	2	2	1	2	chr12	1887019	1893239	+	4	172,187,188,194	0,2597,3035,6026	circRNA	ADIPOR2	ENST00000357103	4,5,6,7	chr12:1882127-1887019|chr12:1893239-1895109
chr12:19406873-19413955	1	3	2	1	1	1	chr12	19406873	19413955	+	4	84,121,105,73	0,1105,3493,7009	circRNA	PLEKHA5	uc010sie.2	4,5,6,7	chr12:19285384-19406873|chr12:19413955-19418683
chr12:19615443-19626289	1	4	9	12	20	5	chr12	19615443	19626289	+	2	208.108	0.10738	circRNA	AEBP2	ENST00000538425	2.3	chr12:19557150-19615443|chr12:19626289-19646733
chr12:19615443-19646920	1	1	1	1	4	1	chr12	19615443	19646920	+	3	208,108,187	0,10738,31290	circRNA	AEBP2	ENST00000541908	2,3,4	chr12:19557058-19615443|chr12:19646920-19653030
chr12:19615443-19653155	0	1	4	7	7	0	chr12	19615443	19653155	+	4	208,108,187,125	0,10738,31290,37587	circRNA	AEBP2	ENST00000541908	2,3,4,5	chr12:19557058-19615443|chr12:19653155-19665331
chr12:19626181-19653155	2	7	5	7	7	7	chr12	19626181	19653155	+	3	108,187,125	0,20552,26849	circRNA	AEBP2	ENST00000541908	3,4,5	chr12:19615651-19626181|chr12:19653155-19665331
chr12:20766376-20807139	0	0	0	4	0	1	chr12	20766376	20807139	+	13	258,155,116,220,86,155,138,112,114,200,204,156,259	0,2787,7853,16465,20250,21459,23657,26403,33047,33308,35245,37002,40504	circRNA	PDE3A	NM_000921	3,4,5,6,7,8,9,10,11,12,13,14,15	chr12:20709644-20766376|chr12:20807139-20832963
chr12:20769163-20787990	0	1	2	7	3	2	chr12	20769163	20787990	+	5	155,116,220,86,155	0,5066,13678,17463,18672	circRNA	PDE3A	NM_000921	4,5,6,7,8	chr12:20766634-20769163|chr12:20787990-20790033
chr12:20774229-20792891	0	0	2	2	1	1	chr12	20774229	20792891	+	6	116,220,86,155,138,112	0,8612,12397,13606,15804,18550	circRNA	PDE3A	NM_000921	5,6,7,8,9,10	chr12:20769318-20774229|chr12:20792891-20799423
chr12:20774229-20807139	0	0	2	3	4	10	chr12	20774229	20807139	+	11	116,220,86,155,138,112,114,200,204,156,259	0,8612,12397,13606,15804,18550,25194,25455,27392,29149,32651	circRNA	PDE3A	NM_000921	5,6,7,8,9,10,11,12,13,14,15	chr12:20769318-20774229|chr12:20807139-20832963
chr12:20782841-20807139	0	0	0	1	3	1	chr12	20782841	20807139	+	10	220,86,155,138,112,114,200,204,156,259	0,3785,4994,7192,9938,16582,16843,18780,20537,24039	circRNA	PDE3A	NM_000921	6,7,8,9,10,11,12,13,14,15	chr12:20774345-20782841|chr12:20807139-20832963
chr12:20790033-20807139	0	1	4	3	10	8	chr12	20790033	20807139	+	7	138,112,114,200,204,156,259	0,2746,9390,9651,11588,13345,16847	circRNA	PDE3A	NM_000921	9,10,11,12,13,14,15	chr12:20787990-20790033|chr12:20807139-20832963
chr12:20803378-20807139	0	1	2	0	2	1	chr12	20803378	20807139	+	2	156.259	0.3502	circRNA	PDE3A	NM_000921	14.15	chr12:20801825-20803378|chr12:20807139-20832963
chr12:22635490-22659753	0	2	0	2	0	0	chr12	22635490	22659753	-	5	187,192,96,115,109	0,2140,7566,10666,24154	circRNA	C2CD5	NM_001286173	15,14,13,12,11	chr12:22631411-22635490|chr12:22659753-22665580
chr12:22643056-22659753	0	1	1	1	4	1	chr12	22643056	22659753	-	3	96,115,109	0,3100,16588	circRNA	C2CD5	NM_001286173	13,12,11	chr12:22637822-22643056|chr12:22659753-22665580
chr12:22646156-22659753	0	3	0	0	0	3	chr12	22646156	22659753	-	2	115.109	0.13488	circRNA	C2CD5	NM_001286173	12.11	chr12:22643152-22646156|chr12:22659753-22665580
chr12:22676359-22678639	0	0	0	3	0	0	chr12	22676359	22678639	-	3	199,156,96	0,1046,2184	circRNA	C2CD5	NM_001286173	7,6,5	chr12:22672173-22676359|chr12:22678639-22680654
chr12:22796696-22826594	0	4	2	8	4	9	chr12	22796696	22826594	+	5	260,141,143,84,161	0,15251,17300,27509,29737	circRNA	ETNK1	ENST00000266517	2,3,4,5,6	chr12:22778520-22796696|chr12:22826594-22837416
chr12:22811947-22826594	0	0	1	1	4	0	chr12	22811947	22826594	+	4	141,143,84,161	0,2049,12258,14486	circRNA	ETNK1	ENST00000266517	3,4,5,6	chr12:22796956-22811947|chr12:22826594-22837416
chr12:24982756-24989530	5	2	2	6	8	2	chr12	24982756	24989530	-	3	75,141,86	0,2900,6688	circRNA	BCAT1	NM_001178094	10,9,8	chr12:24970983-24982756|chr12:24989530-24995015
chr12:24982756-25002883	0	1	0	1	3	0	chr12	24982756	25002883	-	5	75,141,86,143,164	0,2900,6688,12259,19963	circRNA	BCAT1	NM_001178094	10,9,8,7,6	chr12:24970983-24982756|chr12:25002883-25031463
chr12:24985656-24989530	6	6	11	13	15	15	chr12	24985656	24989530	-	2	141.86	0.3788	circRNA	BCAT1	NM_001178094	9.8	chr12:24982831-24985656|chr12:24989530-24995015
chr12:24989444-24995158	1	0	0	1	1	3	chr12	24989444	24995158	-	2	86.143	0.5571	circRNA	BCAT1	NM_001178094	8.7	chr12:24985797-24989444|chr12:24995158-25002719
chr12:24995015-25034345	0	0	0	2	0	0	chr12	24995015	25034345	-	4	143,164,120,111	0,7704,36448,39219	circRNA	BCAT1	NM_001178094	7,6,5,4	chr12:24989530-24995015|chr12:25034345-25047208
chr12:25031463-25047409	1	1	0	3	2	0	chr12	25031463	25047409	-	3	120,111,201	0,2771,15745	circRNA	BCAT1	NM_001178094	5,4,3	chr12:25002883-25031463|chr12:25047409-25054747
chr12:25214525-25222365	0	3	2	4	4	0	chr12	25214525	25222365	+	5	62,81,97,148,82	0,1228,2128,4773,7758	circRNA	LRMP	uc001rgg.2	2,3,4,5,6	chr12:25205890-25214525|chr12:25222365-25232177
chr12:25216653-25222365	0	6	2	4	4	4	chr12	25216653	25222365	+	3	97,148,82	0,2645,5630	circRNA	LRMP	uc001rgg.2	4,5,6	chr12:25215834-25216653|chr12:25222365-25232177
chr12:25216656-25222365	0	0	0	2	0	1	chr12	25216656	25222365	+	2	94.82	0.5627	circRNA	LRMP	NM_001204127	3.4	chr12:25215834-25216656|chr12:25222365-25232177
chr12:25232177-25236427	1	1	1	1	3	2	chr12	25232177	25236427	+	4	47,65,108,71	0,154,412,4179	circRNA	LRMP	uc001rgg.2	7,8,9,10	chr12:25222365-25232177|chr12:25236427-25241033
chr12:25232177-25243131	0	0	0	3	3	1	chr12	25232177	25243131	+	8	47,65,108,71,58,64,28,141	0,154,412,4179,8856,10370,10519,10813	circRNA	LRMP	NM_001204126	5,6,7,8,9,10,11,12	chr12:25222365-25232177|chr12:25243131-25249843
chr12:25378547-25398329	0	1	1	2	0	0	chr12	25378547	25398329	-	3	160,179,122	0,1620,19660	circRNA	KRAS	ENST00000311936	4,3,2	chr12:25362845-25378547|chr12:25398329-25403684
chr12:26634063-26808785	0	2	2	3	0	4	chr12	26634063	26808785	-	24	111,201,257,184,188,109,109,143,191,121,129,126,252,201,123,126,90,174,166,58,130,194,151,145	0,2567,4973,5937,13022,14021,69116,75102,80631,97582,98896,114334,115752,118014,118856,121239,121486,139992,141109,143168,146902,150735,172845,174577	circRNA	ITPR2	NM_002223	43,42,41,40,39,38,37,36,35,34,33,32,31,30,29,28,27,26,25,24,23,22,21,20	chr12:26629940-26634063|chr12:26808785-26809229
chr12:26703179-26755639	1	0	2	0	2	3	chr12	26703179	26755639	-	11	109,143,191,121,129,126,252,201,123,126,90	0,5986,11515,28466,29780,45218,46636,48898,49740,52123,52370	circRNA	ITPR2	NM_002223	37,36,35,34,33,32,31,30,29,28,27	chr12:26648193-26703179|chr12:26755639-26774055
chr12:26703179-26784992	0	2	0	2	2	0	chr12	26703179	26784992	-	16	109,143,191,121,129,126,252,201,123,126,90,174,166,58,130,194	0,5986,11515,28466,29780,45218,46636,48898,49740,52123,52370,70876,71993,74052,77786,81619	circRNA	ITPR2	NM_002223	37,36,35,34,33,32,31,30,29,28,27,26,25,24,23,22	chr12:26648193-26703179|chr12:26784992-26806908
chr12:26703179-26808785	0	0	3	3	1	1	chr12	26703179	26808785	-	18	109,143,191,121,129,126,252,201,123,126,90,174,166,58,130,194,151,145	0,5986,11515,28466,29780,45218,46636,48898,49740,52123,52370,70876,71993,74052,77786,81619,103729,105461	circRNA	ITPR2	NM_002223	37,36,35,34,33,32,31,30,29,28,27,26,25,24,23,22,21,20	chr12:26648193-26703179|chr12:26808785-26809229
chr12:26731645-26755639	0	0	0	1	2	0	chr12	26731645	26755639	-	8	121,129,126,252,201,123,126,90	0,1314,16752,18170,20432,21274,23657,23904	circRNA	ITPR2	NM_002223	34,33,32,31,30,29,28,27	chr12:26714885-26731645|chr12:26755639-26774055
chr12:26748397-26755639	0	0	2	0	1	2	chr12	26748397	26755639	-	6	126,252,201,123,126,90	0,1418,3680,4522,6905,7152	circRNA	ITPR2	NM_002223	32,31,30,29,28,27	chr12:26733088-26748397|chr12:26755639-26774055
chr12:26774055-26784992	0	0	1	4	2	2	chr12	26774055	26784992	-	5	174,166,58,130,194	0,1117,3176,6910,10743	circRNA	ITPR2	NM_002223	26,25,24,23,22	chr12:26755639-26774055|chr12:26784992-26806908
chr12:26780965-26808785	0	2	0	1	1	2	chr12	26780965	26808785	-	4	130,194,151,145	0,3833,25943,27675	circRNA	ITPR2	NM_002223	23,22,21,20	chr12:26777289-26780965|chr12:26808785-26809229
chr12:26806908-26869175	0	0	2	0	0	1	chr12	26806908	26869175	-	16	151,145,252,186,120,173,162,142,161,100,152,45,96,147,84,99	0,1732,2321,3731,4035,5137,9709,11934,27898,28598,32505,41630,57197,61323,61776,62168	circRNA	ITPR2	NM_002223	21,20,19,18,17,16,15,14,13,12,11,10,9,8,7,6	chr12:26784992-26806908|chr12:26869175-26875329
chr12:26864105-26878698	1	2	1	2	1	3	chr12	26864105	26878698	-	7	96,147,84,99,159,87,116	0,4126,4579,4971,11224,13483,14477	circRNA	ITPR2	NM_002223	9,8,7,6,5,4,3	chr12:26848583-26864105|chr12:26878698-26943089
chr12:27064110-27070666	0	0	2	0	2	2	chr12	27064110	27070666	-	7	140,231,155,171,179,90,90	0,2279,2796,3230,4824,6174,6466	circRNA	ASUN	uc001rhk.4	15,14,13,12,11,10,9	chr12:27059370-27064110|chr12:27070666-27075548
chr12:27107077-27110676	0	0	3	4	0	2	chr12	27107077	27110676	+	3	149,118,143	0,2398,3456	circRNA	FGFR1OP2	NM_001171888	2,3,4	chr12:27091643-27107077|chr12:27110676-27113447
chr12:27132716-27143560	1	3	2	3	2	5	chr12	27132716	27143560	-	4	153,81,87,178	0,782,2989,10666	circRNA	TM7SF3	NM_016551	9,8,7,6	chr12:27129290-27132716|chr12:27143560-27148169
chr12:27135705-27143560	0	0	1	2	2	2	chr12	27135705	27143560	-	2	87.178	0.7677	circRNA	TM7SF3	NM_016551	7.6	chr12:27133579-27135705|chr12:27143560-27148169
chr12:27143382-27149795	0	0	0	2	1	0	chr12	27143382	27149795	-	3	178,172,121	0,4787,6292	circRNA	TM7SF3	NM_016551	6,5,4	chr12:27135792-27143382|chr12:27149795-27152458
chr12:27143382-27152609	2	2	2	2	2	3	chr12	27143382	27152609	-	4	178,172,121,151	0,4787,6292,9076	circRNA	TM7SF3	NM_016551	6,5,4,3	chr12:27135792-27143382|chr12:27152609-27156168
chr12:27143382-27156323	0	0	7	8	4	9	chr12	27143382	27156323	-	5	178,172,121,151,155	0,4787,6292,9076,12786	circRNA	TM7SF3	NM_016551	6,5,4,3,2	chr12:27135792-27143382|chr12:27156323-27167010
chr12:27148169-27156323	1	4	3	2	3	7	chr12	27148169	27156323	-	4	172,121,151,155	0,1505,4289,7999	circRNA	TM7SF3	NM_016551	5,4,3,2	chr12:27143560-27148169|chr12:27156323-27167010
chr12:27149674-27152581	1	0	0	1	3	0	chr12	27149674	27152581	-	2	121.123	0.2784	circRNA	TM7SF3	ENST00000539741	4.3	chr12:27148341-27149674|chr12:27152581-27156168
chr12:27149674-27152609	1	6	12	18	10	13	chr12	27149674	27152609	-	2	121.151	0.2784	circRNA	TM7SF3	NM_016551	4.3	chr12:27148341-27149674|chr12:27152609-27156168
chr12:27521194-27533337	1	0	5	4	0	1	chr12	27521194	27533337	+	3	151,42,158	0,8084,11985	circRNA	ARNTL2	ENST00000544915	2,3,4	chr12:27486036-27521194|chr12:27533337-27538413
chr12:27521194-27556474	0	0	2	2	0	0	chr12	27521194	27556474	+	12	151,42,158,80,93,118,144,241,107,151,59,109	0,8084,11985,17219,18966,20917,21834,32272,32995,33262,34357,35171	circRNA	ARNTL2	ENST00000544915	2,3,4,5,6,7,8,9,10,11,12,13	chr12:27486036-27521194|chr12:27556474-27568801
chr12:27786294-27788048	0	0	2	0	0	1	chr12	27786294	27788048	+	2	99.206	0.1548	circRNA	PPFIBP1	uc001rhz.2	3.4	chr12:27731172-27786294|chr12:27788048-27798994
chr12:27802942-27820253	1	0	1	2	1	5	chr12	27802942	27820253	+	7	132,93,93,115,62,85,155	0,4712,5133,6606,10874,14352,17156	circRNA	PPFIBP1	uc010sjr.1	4,5,6,7,8,9,10	chr12:27799081-27802942|chr12:27820253-27824363
chr12:27867712-27872801	0	0	3	0	0	0	chr12	27867712	27872801	+	3	41,168,61	0,1511,5028	circRNA	MRPS35	ENST00000081029	2,3,4	chr12:27863888-27867712|chr12:27872801-27876979
chr12:27867712-27877119	4	5	5	7	7	6	chr12	27867712	27877119	+	4	41,168,61,140	0,1511,5028,9267	circRNA	MRPS35	ENST00000081029	2,3,4,5	chr12:27863888-27867712|chr12:27877119-27888379
chr12:27867712-27890541	0	0	0	0	1	3	chr12	27867712	27890541	+	6	41,168,61,140,110,70	0,1511,5028,9267,20667,22759	circRNA	MRPS35	ENST00000081029	2,3,4,5,6,7	chr12:27863888-27867712|chr12:27890541-27908113
chr12:28378727-28412375	3	12	12	21	6	12	chr12	28378727	28412375	+	3	67,44,79	0,31407,33569	circRNA	CCDC91	NM_001352081	2,3,4	chr12:28343574-28378727|chr12:28412375-28458581
chr12:28408513-28412375	3	7	5	2	5	9	chr12	28408513	28412375	+	3	82,44,79	0,1621,3783	circRNA	CCDC91	NM_001352078	2,3,4	chr12:28343574-28408513|chr12:28412375-28458581
chr12:28408513-28460682	1	3	4	3	4	7	chr12	28408513	28460682	+	6	82,44,79,158,204,105	0,1621,3783,50068,51161,52064	circRNA	CCDC91	NM_001352078	2,3,4,5,6,7	chr12:28343574-28408513|chr12:28460682-28515370
chr12:28408513-28544344	2	2	2	7	4	1	chr12	28408513	28544344	+	8	82,44,79,158,204,105,78,108	0,1621,3783,50068,51161,52064,106857,135723	circRNA	CCDC91	NM_001352078	2,3,4,5,6,7,8,9	chr12:28343574-28408513|chr12:28544344-28603093
chr12:28410134-28460682	0	0	0	0	0	2	chr12	28410134	28460682	+	6	44,79,86,158,204,105	0,2162,47424,48447,49540,50443	circRNA	CCDC91	ENST00000535520	3,4,5,6,7,8	chr12:28336772-28410134|chr12:28460682-28515370
chr12:28458581-28460682	4	3	10	15	12	11	chr12	28458581	28460682	+	3	158,204,105	0,1093,1996	circRNA	CCDC91	ENST00000535520	6,7,8	chr12:28457644-28458581|chr12:28460682-28515370
chr12:28458581-28544344	3	13	9	10	6	4	chr12	28458581	28544344	+	5	158,204,105,78,108	0,1093,1996,56789,85655	circRNA	CCDC91	ENST00000535520	6,7,8,9,10	chr12:28457644-28458581|chr12:28544344-28603093
chr12:2929251-2930958	3	13	7	4	12	10	chr12	2929251	2930958	+	5	140,149,98,54,101	0,638,1176,1457,1606	circRNA	ITFG2	NM_018463	5,6,7,8,9	chr12:2927443-2929251|chr12:2930958-2931959
chr12:29423344-29450133	0	2	2	2	0	2	chr12	29423344	29450133	+	3	227,176,180	0,22888,26609	circRNA	FAR2	NM_001271783	2,3,4	chr12:29302340-29423344|chr12:29450133-29460590
chr12:29423344-29469945	0	0	0	0	2	0	chr12	29423344	29469945	+	8	227,176,180,178,45,119,68,172	0,22888,26609,37246,38774,40616,41471,46429	circRNA	FAR2	NM_001271783	2,3,4,5,6,7,8,9	chr12:29302340-29423344|chr12:29469945-29474727
chr12:29423344-29474857	0	0	0	0	0	2	chr12	29423344	29474857	+	9	227,176,180,178,45,119,68,172,130	0,22888,26609,37246,38774,40616,41471,46429,51383	circRNA	FAR2	NM_001271783	2,3,4,5,6,7,8,9,10	chr12:29302340-29423344|chr12:29474857-29485532
chr12:29446232-29450133	0	3	4	9	7	6	chr12	29446232	29450133	+	2	176.18	0.3721	circRNA	FAR2	NM_001271783	3.4	chr12:29423571-29446232|chr12:29450133-29460590
chr12:29446232-29474857	0	2	5	6	6	4	chr12	29446232	29474857	+	8	176,180,178,45,119,68,172,130	0,3721,14358,15886,17728,18583,23541,28495	circRNA	FAR2	NM_001271783	3,4,5,6,7,8,9,10	chr12:29423571-29446232|chr12:29474857-29485532
chr12:29460590-29469945	0	0	0	3	1	0	chr12	29460590	29469945	+	5	178,45,119,68,172	0,1528,3370,4225,9183	circRNA	FAR2	NM_001271783	5,6,7,8,9	chr12:29450133-29460590|chr12:29469945-29474727
chr12:2973485-2974565	0	0	1	0	2	0	chr12	2973485	2974565	-	3	176,70,45	0,363,1035	circRNA	FOXM1	NM_021953	8,7,6	chr12:2968829-2973485|chr12:2974565-2975558
chr12:2983142-2983691	0	3	1	0	2	0	chr12	2983142	2983691	-	1	549	0	circRNA	FOXM1	NM_001243088	2	chr12:2981410-2983142|chr12:2983691-2986085
chr12:30818153-30819185	0	2	0	1	0	1	chr12	30818153	30819185	-	3	90,117,77	0,509,955	circRNA	IPO8	NM_001190995	9,8,7	chr12:30816588-30818153|chr12:30819185-30822116
chr12:30881581-30904067	0	1	2	0	2	4	chr12	30881581	30904067	-	6	678,44,168,239,91,63	0,1591,2695,6320,12368,22423	circRNA	CAPRIN2	ENST00000537553	7,6,5,4,3,2	chr12:30879022-30881581|chr12:30904067-30906277
chr12:3103903-3131183	0	0	0	0	1	3	chr12	3103903	3131183	+	8	255,65,63,129,44,56,140,174	0,16266,17432,22660,23807,24377,25896,27106	circRNA	TEAD4	NM_003213	3,4,5,6,7,8,9,10	chr12:3069206-3103903|chr12:3131183-3147133
chr12:31568300-31579358	0	0	0	2	0	0	chr12	31568300	31579358	-	4	82,79,153,132	0,8230,9168,10926	circRNA	DENND5B	ENST00000306833	13,12,11,10	chr12:31566498-31568300|chr12:31579358-31586088
chr12:31595708-31600703	0	0	0	0	4	0	chr12	31595708	31600703	-	2	151.232	0.4763	circRNA	DENND5B	ENST00000306833	8.7	chr12:31586182-31595708|chr12:31600703-31604873
chr12:31604873-31613315	0	0	0	0	0	2	chr12	31604873	31613315	-	2	537.188	0.8254	circRNA	DENND5B	ENST00000306833	6.5	chr12:31600703-31604873|chr12:31613315-31632522
chr12:31841940-31862359	0	0	0	0	1	2	chr12	31841940	31862359	-	5	112,57,218,145,133	0,8354,8733,12856,20286	circRNA	AMN1	ENST00000281471	6,5,4,3,2	chr12:31825311-31841940|chr12:31862359-31881904
chr12:32480394-32481489	0	4	6	1	2	2	chr12	32480394	32481489	+	1	1095	0	circRNA	BICD1	ENST00000548411	5	chr12:32459056-32480394|chr12:32481489-32487449
chr12:32751430-32764217	1	2	2	7	16	1	chr12	32751430	32764217	+	6	90,146,157,139,59,147	0,2781,3664,9460,12279,12640	circRNA	FGD4	ENST00000534526	5,6,7,8,9,10	chr12:32735401-32751430|chr12:32764217-32772631
chr12:32760890-32764217	2	1	1	2	4	2	chr12	32760890	32764217	+	3	139,59,147	0,2819,3180	circRNA	FGD4	ENST00000534526	8,9,10	chr12:32755251-32760890|chr12:32764217-32772631
chr12:32854348-32863949	0	1	0	2	0	0	chr12	32854348	32863949	+	4	148,47,72,87	0,5952,6738,9514	circRNA	DNM1L	ENST00000452533	2,3,4,5	chr12:32832399-32854348|chr12:32863949-32866142
chr12:32854348-32866305	0	0	0	2	2	1	chr12	32854348	32866305	+	5	148,47,72,87,163	0,5952,6738,9514,11794	circRNA	DNM1L	ENST00000452533	2,3,4,5,6	chr12:32832399-32854348|chr12:32866305-32871576
chr12:32861086-32866305	0	0	0	2	1	0	chr12	32861086	32866305	+	3	72,87,163	0,2776,5056	circRNA	DNM1L	ENST00000452533	4,5,6	chr12:32860347-32861086|chr12:32866305-32871576
chr12:32861086-32871697	1	1	5	3	6	2	chr12	32861086	32871697	+	4	72,87,163,121	0,2776,5056,10490	circRNA	DNM1L	ENST00000452533	4,5,6,7	chr12:32860347-32861086|chr12:32871697-32873597
chr12:32861086-32895682	0	1	0	1	2	0	chr12	32861086	32895682	+	15	72,87,163,121,132,207,121,156,90,93,57,33,177,110,160	0,2776,5056,10490,12511,14274,22861,23203,23701,25562,28952,30111,31911,32256,34436	circRNA	DNM1L	ENST00000452533	4,5,6,7,8,9,10,11,12,13,14,15,16,17,18	chr12:32860347-32861086|chr12:32895682-32896287
chr12:32863862-32866305	0	1	0	0	1	2	chr12	32863862	32866305	+	2	87.163	0.228	circRNA	DNM1L	ENST00000452533	5.6	chr12:32861158-32863862|chr12:32866305-32871576
chr12:32863862-32871697	1	0	0	1	4	1	chr12	32863862	32871697	+	3	87,163,121	0,2280,7714	circRNA	DNM1L	ENST00000452533	5,6,7	chr12:32861158-32863862|chr12:32871697-32873597
chr12:32866142-32871697	0	0	2	1	3	5	chr12	32866142	32871697	+	2	163.121	0.5434	circRNA	DNM1L	ENST00000452533	6.7	chr12:32863949-32866142|chr12:32871697-32873597
chr12:32866142-32875567	0	1	2	6	12	5	chr12	32866142	32875567	+	4	163,121,132,207	0,5434,7455,9218	circRNA	DNM1L	ENST00000452533	6,7,8,9	chr12:32863949-32866142|chr12:32875567-32883947
chr12:32871576-32875567	0	2	0	2	3	4	chr12	32871576	32875567	+	3	121,132,207	0,2021,3784	circRNA	DNM1L	ENST00000452533	7,8,9	chr12:32866305-32871576|chr12:32875567-32883947
chr12:3763377-3782758	0	0	0	0	2	1	chr12	3763377	3782758	-	4	188,96,91,147	0,2099,5352,19234	circRNA	EFCAB4B	uc010sen.1	10,9,8,7	chr12:3757779-3763377|chr12:3782758-3788080
chr12:39154648-39170103	0	1	2	1	0	0	chr12	39154648	39170103	-	4	42,105,104,64	0,1265,6788,15391	circRNA	CPNE8	ENST00000331366	10,9,8,7	chr12:39124160-39154648|chr12:39170103-39223180
chr12:3916053-3939184	0	0	0	0	2	0	chr12	3916053	3939184	-	7	216,152,131,73,76,121,129	0,7149,14985,15197,19270,22022,23002	circRNA	PARP11	ENST00000416739	8,7,6,5,4,3,2	chr12:3908002-3916053|chr12:3939184-3982377
chr12:39223180-39242464	0	3	0	0	0	2	chr12	39223180	39242464	-	3	77,40,104	0,10537,19180	circRNA	CPNE8	ENST00000331366	6,5,4	chr12:39170103-39223180|chr12:39242464-39266805
chr12:3923202-3973123	0	1	2	3	2	2	chr12	3923202	3973123	-	6	152,131,73,76,129,122	0,7836,8048,12121,15853,49799	circRNA	PARP11	ENST00000427057	7,6,5,4,3,2	chr12:3921605-3923202|chr12:3973123-3982377
chr12:3931038-3973123	0	3	2	2	2	1	chr12	3931038	3973123	-	5	131,73,76,129,122	0,212,4285,8017,41963	circRNA	PARP11	ENST00000427057	6,5,4,3,2	chr12:3923354-3931038|chr12:3973123-3982377
chr12:40258563-40265763	0	0	0	0	3	0	chr12	40258563	40265763	-	2	121.164	0.7036	circRNA	SLC2A13	ENST00000280871	6.5	chr12:40224030-40258563|chr12:40265763-40345058
chr12:40422102-40442012	0	1	1	1	4	2	chr12	40422102	40442012	-	2	209.16	0.1975	circRNA	SLC2A13	ENST00000280871	3.2	chr12:40345167-40422102|chr12:40442012-40499054
chr12:42491243-42512973	0	2	0	1	0	2	chr12	42491243	42512973	-	5	173,124,252,126,172	0,468,8376,12124,21558	circRNA	GXYLT1	ENST00000398675	7,6,5,4,3	chr12:42481749-42491243|chr12:42512973-42523560
chr12:42592937-42604421	0	2	0	0	0	0	chr12	42592937	42604421	-	2	100.72	0.11412	circRNA	YAF2	NR_135139	4.3	chr12:42566011-42592937|chr12:42604421-42631400
chr12:42604156-42604421	1	1	0	1	3	0	chr12	42604156	42604421	-	2	100.72	0.193	circRNA	YAF2	ENST00000551268	5.4	chr12:42555567-42604156|chr12:42604421-42629415
chr12:42604156-42604482	12	34	10	16	19	13	chr12	42604156	42604482	-	2	100.133	0.193	circRNA	YAF2	NR_135140	5.4	chr12:42555567-42604156|chr12:42604482-42606245
chr12:42604156-42606286	0	3	6	3	6	3	chr12	42604156	42606286	-	3	100,133,41	0,193,2089	circRNA	YAF2	NR_135140	5,4,3	chr12:42555567-42604156|chr12:42606286-42631400
chr12:42711141-42717906	1	2	1	0	4	0	chr12	42711141	42717906	-	4	108,112,29,86	0,447,5078,6679	circRNA	ZCRB1	ENST00000266529	5,4,3,2	chr12:42707788-42711141|chr12:42717906-42719725
chr12:42729684-42768876	0	0	0	0	2	0	chr12	42729684	42768876	+	4	92,165,62,212	0,16002,19278,38980	circRNA	PPHLN1	ENST00000549190	2,3,4,5	chr12:42632463-42729684|chr12:42768876-42778741
chr12:42745171-42745851	0	0	3	0	0	0	chr12	42745171	42745851	+	2	102.165	0.515	circRNA	PPHLN1	ENST00000552794	2.3	chr12:42744068-42745171|chr12:42745851-42748962
chr12:42745686-42792796	0	7	7	8	10	2	chr12	42745686	42792796	+	7	165,62,212,57,80,120,141	0,3276,22978,33055,35571,41685,46969	circRNA	PPHLN1	ENST00000549190	3,4,5,6,7,8,9	chr12:42729776-42745686|chr12:42792796-42835116
chr12:42748962-42781337	0	5	3	5	10	6	chr12	42748962	42781337	+	4	62,212,57,80	0,19702,29779,32295	circRNA	PPHLN1	ENST00000549190	4,5,6,7	chr12:42745851-42748962|chr12:42781337-42787371
chr12:42748962-42792796	3	5	5	6	8	3	chr12	42748962	42792796	+	6	62,212,57,80,120,141	0,19702,29779,32295,38409,43693	circRNA	PPHLN1	ENST00000549190	4,5,6,7,8,9	chr12:42745851-42748962|chr12:42792796-42835116
chr12:42768664-42768876	0	0	1	0	3	1	chr12	42768664	42768876	+	1	212	0	circRNA	PPHLN1	ENST00000549190	5	chr12:42749024-42768664|chr12:42768876-42778741
chr12:42768664-42781337	0	1	0	1	2	1	chr12	42768664	42781337	+	3	212,57,80	0,10077,12593	circRNA	PPHLN1	ENST00000549190	5,6,7	chr12:42749024-42768664|chr12:42781337-42787371
chr12:42768664-42792796	1	3	2	6	7	3	chr12	42768664	42792796	+	5	212,57,80,120,141	0,10077,12593,18707,23991	circRNA	PPHLN1	ENST00000549190	5,6,7,8,9	chr12:42749024-42768664|chr12:42792796-42835116
chr12:42778741-42792796	1	2	3	4	4	3	chr12	42778741	42792796	+	4	57,80,120,141	0,2516,8630,13914	circRNA	PPHLN1	ENST00000549190	6,7,8,9	chr12:42768876-42778741|chr12:42792796-42835116
chr12:45725077-45744557	0	0	0	0	2	1	chr12	45725077	45744557	+	5	129,66,288,114,116	0,15727,16733,17223,19364	circRNA	ANO6	ENST00000426898	2,3,4,5,6	chr12:45610174-45725077|chr12:45744557-45751072
chr12:45725077-45751207	2	2	2	4	5	1	chr12	45725077	45751207	+	6	129,66,288,114,116,135	0,15727,16733,17223,19364,25995	circRNA	ANO6	ENST00000426898	2,3,4,5,6,7	chr12:45610174-45725077|chr12:45751207-45761470
chr12:45771835-45784281	0	2	1	3	5	1	chr12	45771835	45784281	+	4	61,161,143,78	0,5142,10108,12368	circRNA	ANO6	ENST00000426898	9,10,11,12	chr12:45761576-45771835|chr12:45784281-45795577
chr12:45814853-45816845	0	1	1	1	2	1	chr12	45814853	45816845	+	2	203.106	0.1886	circRNA	ANO6	NM_001025356	18.19	chr12:45810687-45814853|chr12:45816845-45822887
chr12:459786-463400	3	4	8	2	2	6	chr12	459786	463400	-	3	159,120,159	0,1584,3455	circRNA	KDM5A	uc001qif.1	10,9,8	chr12:443588-459786|chr12:463400-464323
chr12:459786-465703	4	3	5	7	4	3	chr12	459786	465703	-	5	159,120,159,92,106	0,1584,3455,4537,5811	circRNA	KDM5A	uc001qif.1	10,9,8,7,6	chr12:443588-459786|chr12:465703-472128
chr12:459786-475270	1	2	2	7	4	2	chr12	459786	475270	-	7	159,120,159,92,106,135,171	0,1584,3455,4537,5811,12342,15313	circRNA	KDM5A	uc001qif.1	10,9,8,7,6,5,4	chr12:443588-459786|chr12:475270-493196
chr12:46205200-46215270	0	0	1	2	2	1	chr12	46205200	46215270	+	3	134,219,68	0,6252,10002	circRNA	ARID2	ENST00000334344	4,5,6	chr12:46125097-46205200|chr12:46215270-46230371
chr12:46230371-46233279	0	3	2	3	6	3	chr12	46230371	46233279	+	5	67,251,97,210,168	0,152,732,909,2740	circRNA	ARID2	ENST00000334344	7,8,9,10,11	chr12:46215270-46230371|chr12:46233279-46240638
chr12:46230371-46287504	0	3	1	1	0	0	chr12	46230371	46287504	+	14	67,251,97,210,168,82,135,197,2861,149,139,86,124,92	0,152,732,909,2740,10267,12247,12991,13447,24212,55191,55422,56831,57041	circRNA	ARID2	ENST00000334344	7,8,9,10,11,12,13,14,15,16,17,18,19,20	chr12:46215270-46230371|chr12:46287504-46298716
chr12:46254583-46287504	0	0	0	0	2	2	chr12	46254583	46287504	+	5	149,139,86,124,92	0,30979,31210,32619,32829	circRNA	ARID2	ENST00000334344	16,17,18,19,20	chr12:46246679-46254583|chr12:46287504-46298716
chr12:46285562-46287504	0	2	6	4	3	5	chr12	46285562	46287504	+	4	139,86,124,92	0,231,1640,1850	circRNA	ARID2	ENST00000334344	17,18,19,20	chr12:46254732-46285562|chr12:46287504-46298716
chr12:46316245-46318857	0	2	0	0	0	0	chr12	46316245	46318857	-	3	120,219,347	0,473,2265	circRNA	SCAF11	uc001row.3	4,3,2	chr12:46315977-46316245|chr12:46318857-46319924
chr12:46319924-46322642	2	14	6	15	7	7	chr12	46319924	46322642	-	1	2718	0	circRNA	SCAF11	NM_004719	11	chr12:46318857-46319924|chr12:46322642-46325288
chr12:46339031-46357971	2	2	2	7	2	1	chr12	46339031	46357971	-	5	65,101,78,158,82	0,3188,6401,16451,18858	circRNA	SCAF11	NM_004719	6,5,4,3,2	chr12:46328288-46339031|chr12:46357971-46384135
chr12:46622935-46637097	23	32	38	59	52	49	chr12	46622935	46637097	-	4	116,76,215,115	0,411,10526,14047	circRNA	SLC38A1	NM_001278389	5,4,3,2	chr12:46602910-46622935|chr12:46637097-46660228
chr12:46622935-46648719	2	6	6	10	4	9	chr12	46622935	46648719	-	5	116,76,215,115,123	0,411,10526,14047,25661	circRNA	SLC38A1	NM_001278387	6,5,4,3,2	chr12:46602910-46622935|chr12:46648719-46662308
chr12:46633461-46637097	2	4	16	26	9	17	chr12	46633461	46637097	-	2	215.115	0.3521	circRNA	SLC38A1	NM_001278389	3.2	chr12:46623422-46633461|chr12:46637097-46660228
chr12:46633461-46648719	1	1	3	1	3	9	chr12	46633461	46648719	-	3	215,115,123	0,3521,15135	circRNA	SLC38A1	NM_001278387	4,3,2	chr12:46623422-46633461|chr12:46648719-46662308
chr12:472128-475270	0	2	0	1	0	1	chr12	472128	475270	-	2	135.171	0.2971	circRNA	KDM5A	uc001qif.1	5.4	chr12:465703-472128|chr12:475270-493196
chr12:48457492-48468576	0	0	3	0	0	0	chr12	48457492	48468576	-	7	132,156,85,39,55,284,104	0,1355,1886,3217,7957,10614,10980	circRNA	SENP1	uc031qhb.1	11,10,9,8,7,6,5	chr12:48442915-48457492|chr12:48468576-48477373
chr12:48457492-48483076	0	0	0	2	0	0	chr12	48457492	48483076	-	10	132,156,85,39,55,284,104,172,160,131	0,1355,1886,3217,7957,10614,10980,19881,25091,25453	circRNA	SENP1	ENST00000552189	14,13,12,11,10,9,8,7,6,5	chr12:48442915-48457492|chr12:48483076-48490125
chr12:48457492-48495299	1	0	3	4	5	1	chr12	48457492	48495299	-	13	132,156,85,39,55,284,104,172,160,131,85,131,48	0,1355,1886,3217,7957,10614,10980,19881,25091,25453,32633,34284,37759	circRNA	SENP1	ENST00000552189	14,13,12,11,10,9,8,7,6,5,4,3,2	chr12:48442915-48457492|chr12:48495299-48499184
chr12:48477373-48491907	3	4	3	4	5	3	chr12	48477373	48491907	-	5	172,160,131,85,131	0,5210,5572,12752,14403	circRNA	SENP1	ENST00000552189	7,6,5,4,3	chr12:48468576-48477373|chr12:48491907-48495251
chr12:48477373-48495299	1	3	1	0	2	2	chr12	48477373	48495299	-	6	172,160,131,85,131,48	0,5210,5572,12752,14403,17878	circRNA	SENP1	ENST00000552189	7,6,5,4,3,2	chr12:48468576-48477373|chr12:48495299-48499184
chr12:48482583-48491907	1	2	2	3	1	2	chr12	48482583	48491907	-	4	160,131,85,131	0,362,7542,9193	circRNA	SENP1	ENST00000552189	6,5,4,3	chr12:48477545-48482583|chr12:48491907-48495251
chr12:48490125-48495299	0	0	2	0	0	0	chr12	48490125	48495299	-	3	85,131,48	0,1651,5126	circRNA	SENP1	ENST00000552189	4,3,2	chr12:48483076-48490125|chr12:48495299-48499184
chr12:49167251-49167881	0	0	0	0	1	2	chr12	49167251	49167881	-	2	179.159	0.471	circRNA	ADCY6	NM_015270	16.15	chr12:49166326-49167251|chr12:49167881-49168184
chr12:49333437-49334971	0	14	1	1	21	3	chr12	49333437	49334971	-	3	125,111,241	0,342,1293	circRNA	RP11-302B13.5	ENST00000398092	4,3,2	chr12:49297691-49333437|chr12:49334971-49351092
chr12:49398289-49399635	0	2	0	0	0	0	chr12	49398289	49399635	-	6	127,55,46,59,82,110	0,457,613,799,955,1236	circRNA	PRKAG1	NM_001206710	8,7,6,5,4,3	chr12:49397705-49398289|chr12:49399635-49406844
chr12:49491348-49491888	1	8	4	3	6	5	chr12	49491348	49491888	-	2	174.162	0.378	circRNA	LMBR1L	ENST00000553040	7.6	chr12:49491044-49491348|chr12:49491888-49494170
chr12:49854552-49884514	0	2	2	5	2	2	chr12	49854552	49884514	+	4	268,80,109,50	0,23820,28695,29912	circRNA	SPATS2	ENST00000550997	2,3,4,5	chr12:49760503-49854552|chr12:49884514-49888523
chr12:49854552-49893988	1	1	3	7	2	1	chr12	49854552	49893988	+	7	268,80,109,50,262,177,136	0,23820,28695,29912,33971,36063,39300	circRNA	SPATS2	ENST00000549412	3,4,5,6,7,8,9	chr12:49765073-49854552|chr12:49893988-49906644
chr12:49888523-49893988	2	5	4	6	5	0	chr12	49888523	49893988	+	3	262,177,136	0,2092,5329	circRNA	SPATS2	ENST00000549412	7,8,9	chr12:49884514-49888523|chr12:49893988-49906644
chr12:49890615-49893988	0	1	3	2	1	0	chr12	49890615	49893988	+	2	177.136	0.3237	circRNA	SPATS2	ENST00000549412	8.9	chr12:49888785-49890615|chr12:49893988-49906644
chr12:50055748-50062337	0	2	0	0	1	1	chr12	50055748	50062337	-	4	84,77,81,84	0,3866,4161,6505	circRNA	FMNL3	ENST00000335154	5,4,3,2	chr12:50052377-50055748|chr12:50062337-50100837
chr12:50385780-50386438	0	4	9	9	11	5	chr12	50385780	50386438	-	3	136,133,106	0,247,552	circRNA	RACGAP1	ENST00000427314	17,16,15	chr12:50384575-50385780|chr12:50386438-50387913
chr12:50385780-50388292	0	0	2	1	1	1	chr12	50385780	50388292	-	5	136,133,106,199,96	0,247,552,2133,2416	circRNA	RACGAP1	ENST00000427314	17,16,15,14,13	chr12:50384575-50385780|chr12:50388292-50390822
chr12:50390822-50399175	0	0	2	0	0	0	chr12	50390822	50399175	-	7	165,131,118,81,54,70,137	0,2101,2576,4132,5207,7195,8216	circRNA	RACGAP1	ENST00000427314	12,11,10,9,8,7,6	chr12:50388292-50390822|chr12:50399175-50400216
chr12:50398017-50400419	0	0	2	0	0	0	chr12	50398017	50400419	-	3	70,137,203	0,1021,2199	circRNA	RACGAP1	ENST00000427314	7,6,5	chr12:50396083-50398017|chr12:50400419-50410413
chr12:50488219-50490755	0	1	2	2	0	1	chr12	50488219	50490755	+	2	136.123	0.2413	circRNA	SMARCD1	ENST00000394963	10.11	chr12:50484373-50488219|chr12:50490755-50492496
chr12:50821544-50822873	1	1	5	7	5	7	chr12	50821544	50822873	+	2	148.156	0.1173	circRNA	LARP4	ENST00000550522	2.3	chr12:50786371-50821544|chr12:50822873-50824277
chr12:50821544-50824353	2	4	4	10	15	15	chr12	50821544	50824353	+	3	148,156,76	0,1173,2733	circRNA	LARP4	NM_001352325	2,3,4	chr12:50794811-50821544|chr12:50824353-50829270
chr12:50821544-50829407	0	4	3	4	4	3	chr12	50821544	50829407	+	4	148,156,76,137	0,1173,2733,7726	circRNA	LARP4	NM_001352325	2,3,4,5	chr12:50794811-50821544|chr12:50829407-50831517
chr12:50821544-50831621	0	0	2	5	3	1	chr12	50821544	50831621	+	5	148,156,76,137,104	0,1173,2733,7726,9973	circRNA	LARP4	NM_001352325	2,3,4,5,6	chr12:50794811-50821544|chr12:50831621-50834221
chr12:50821544-50835426	1	1	9	11	10	10	chr12	50821544	50835426	+	7	148,156,76,137,104,111,54	0,1173,2733,7726,9973,12677,13828	circRNA	LARP4	NM_001352325	2,3,4,5,6,7,8	chr12:50794811-50821544|chr12:50835426-50847242
chr12:50821544-50848200	1	0	2	4	1	3	chr12	50821544	50848200	+	9	148,156,76,137,104,111,54,213,104	0,1173,2733,7726,9973,12677,13828,25698,26552	circRNA	LARP4	NM_001170804	2,3,4,5,6,7,8,9,10	chr12:50794811-50821544|chr12:50848200-50854917
chr12:50821544-50855130	0	0	2	2	3	0	chr12	50821544	50855130	+	10	148,174,76,137,104,111,54,213,104,213	0,1155,2733,7726,9973,12677,13828,25698,26552,33373	circRNA	LARP4	NM_001330415	2,3,4,5,6,7,8,9,10,11	chr12:50794811-50821544|chr12:50855130-50856364
chr12:50821547-50824353	2	0	1	2	1	1	chr12	50821547	50824353	+	3	145,174,76	0,1152,2730	circRNA	LARP4	NM_001352305	2,3,4	chr12:50794811-50821547|chr12:50824353-50829270
chr12:50824277-50831621	0	0	0	0	3	0	chr12	50824277	50831621	+	3	76,137,104	0,4993,7240	circRNA	LARP4	NM_001352325	4,5,6	chr12:50822873-50824277|chr12:50831621-50834221
chr12:50824277-50835426	0	0	2	2	1	1	chr12	50824277	50835426	+	5	76,137,104,111,54	0,4993,7240,9944,11095	circRNA	LARP4	NM_001352325	4,5,6,7,8	chr12:50822873-50824277|chr12:50835426-50847242
chr12:50829270-50847455	0	1	0	0	2	0	chr12	50829270	50847455	+	5	137,104,111,54,213	0,2247,4951,6102,17972	circRNA	LARP4	NM_001352325	5,6,7,8,9	chr12:50824353-50829270|chr12:50847455-50848096
chr12:50831517-50835426	1	2	0	0	0	2	chr12	50831517	50835426	+	3	104,111,54	0,2704,3855	circRNA	LARP4	NM_001352325	6,7,8	chr12:50829407-50831517|chr12:50835426-50847242
chr12:50848096-50855130	1	1	0	2	2	3	chr12	50848096	50855130	+	2	104.213	0.6821	circRNA	LARP4	NM_001330415	10.11	chr12:50847455-50848096|chr12:50855130-50856364
chr12:51064968-51074546	0	5	1	0	0	0	chr12	51064968	51074546	+	5	213,156,120,198,92	0,3288,4143,7493,9486	circRNA	DIP2B	NM_173602	5,6,7,8,9	chr12:51054102-51064968|chr12:51074546-51076920
chr12:51173922-51203372	4	4	6	5	5	0	chr12	51173922	51203372	+	3	99,101,134	0,15769,29316	circRNA	ATF1	ENST00000552510	2,3,4	chr12:51157524-51173922|chr12:51203372-51207792
chr12:51207792-51208222	2	2	5	8	3	1	chr12	51207792	51208222	+	2	183.16	0.27	circRNA	ATF1	NM_005171	5.6	chr12:51203372-51207792|chr12:51208222-51213417
chr12:51375421-51404549	0	0	0	1	1	3	chr12	51375421	51404549	-	16	165,54,154,74,150,120,87,159,156,68,71,107,120,126,149,72	0,6743,9156,9960,10551,11171,12905,13990,15178,17535,17706,18674,23149,23672,26837,29056	circRNA	SLC11A2	NR_033422	17,16,15,14,13,12,11,10,9,8,7,6,5,4,3,2	chr12:51373841-51375421|chr12:51404549-51420097
chr12:51402258-51404549	10	5	9	6	8	9	chr12	51402258	51404549	-	2	149.72	0.2219	circRNA	SLC11A2	ENST00000262051	3.2	chr12:51399219-51402258|chr12:51404549-51420092
chr12:51442816-51450285	1	3	0	1	3	1	chr12	51442816	51450285	+	6	152,116,83,187,102,153	0,3058,4744,6801,7110,7316	circRNA	LETMD1	ENST00000551477	2,3,4,5,6,7	chr12:51442081-51442816|chr12:51450285-51451814
chr12:51442816-51451911	0	2	2	0	7	3	chr12	51442816	51451911	+	3	152,153,97	0,7316,8998	circRNA	LETMD1	NR_147098	2,3,4	chr12:51442081-51442816|chr12:51451911-51453143
chr12:51449617-51450285	1	0	2	2	0	3	chr12	51449617	51450285	+	3	187,102,153	0,309,515	circRNA	LETMD1	ENST00000551477	5,6,7	chr12:51447643-51449617|chr12:51450285-51451814
chr12:51461455-51461752	0	3	0	0	0	1	chr12	51461455	51461752	-	1	297	0	circRNA	CSRNP2	NR_045072	4	chr12:51458452-51461455|chr12:51461752-51467605
chr12:514676-527802	0	1	2	2	0	1	chr12	514676	527802	+	3	54,232,143	0,6236,12983	circRNA	CCDC77	ENST00000422000	2,3,4	chr12:498652-514676|chr12:527802-537934
chr12:51497452-51512555	0	0	0	0	0	2	chr12	51497452	51512555	-	9	94,49,89,111,153,107,106,77,152	0,485,2855,3566,5451,7207,12645,14001,14951	circRNA	TFCP2	ENST00000257915	10,9,8,7,6,5,4,3,2	chr12:51495808-51497452|chr12:51512555-51566083
chr12:51504659-51512555	0	2	0	0	0	1	chr12	51504659	51512555	-	4	107,106,77,152	0,5438,6794,7744	circRNA	TFCP2	ENST00000257915	5,4,3,2	chr12:51503056-51504659|chr12:51512555-51566083
chr12:51510097-51512555	0	0	0	0	1	2	chr12	51510097	51512555	-	3	106,77,152	0,1356,2306	circRNA	TFCP2	ENST00000257915	4,3,2	chr12:51504766-51510097|chr12:51512555-51566083
chr12:51634126-51634900	0	0	1	2	1	3	chr12	51634126	51634900	+	2	119.246	0.528	circRNA	DAZAP2	ENST00000412716	2.3	chr12:51632704-51634126|chr12:51634900-51636113
chr12:51678499-51681972	0	0	2	0	0	0	chr12	51678499	51681972	-	2	72.81	0.3392	circRNA	BIN2	ENST00000452142	11.1	chr12:51675312-51678499|chr12:51681972-51685374
chr12:51681891-51689662	0	1	2	2	3	0	chr12	51681891	51689662	-	3	81,754,83	0,3483,7688	circRNA	BIN2	ENST00000452142	10,9,8	chr12:51678571-51681891|chr12:51689662-51690872
chr12:51685374-51689662	0	0	1	1	3	1	chr12	51685374	51689662	-	2	754.83	0.4205	circRNA	BIN2	ENST00000604560	9.8	chr12:51678564-51685374|chr12:51689662-51690872
chr12:51685374-51693498	0	0	0	2	1	0	chr12	51685374	51693498	-	5	754,83,76,86,108	0,4205,5498,7612,8016	circRNA	BIN2	ENST00000604560	9,8,7,6,5	chr12:51678564-51685374|chr12:51693498-51695803
chr12:51689579-51690948	1	1	0	3	4	1	chr12	51689579	51690948	-	2	83.76	0.1293	circRNA	BIN2	ENST00000604560	8.7	chr12:51686128-51689579|chr12:51690948-51692986
chr12:51689579-51693498	2	0	1	1	3	0	chr12	51689579	51693498	-	4	83,76,86,108	0,1293,3407,3811	circRNA	BIN2	ENST00000604560	8,7,6,5	chr12:51686128-51689579|chr12:51693498-51695803
chr12:51692986-51693498	1	6	2	8	7	5	chr12	51692986	51693498	-	2	86.108	0.404	circRNA	BIN2	ENST00000604560	6.5	chr12:51690948-51692986|chr12:51693498-51695803
chr12:53410256-53416411	1	0	1	1	2	2	chr12	53410256	53416411	+	5	138,209,117,55,135	0,2325,3437,5333,6020	circRNA	EIF4B	ENST00000262056	2,3,4,5,6	chr12:53400280-53410256|chr12:53416411-53421565
chr12:53421565-53421972	2	5	2	2	3	1	chr12	53421565	53421972	+	2	138.174	0.233	circRNA	EIF4B	ENST00000262056	7.8	chr12:53416411-53421565|chr12:53421972-53427589
chr12:53421565-53431406	0	0	2	0	0	0	chr12	53421565	53431406	+	5	138,174,229,98,214	0,233,6024,6830,9627	circRNA	EIF4B	ENST00000262056	7,8,9,10,11	chr12:53416411-53421565|chr12:53431406-53432139
chr12:53431192-53432195	0	1	0	1	0	2	chr12	53431192	53432195	+	2	214.56	0.947	circRNA	EIF4B	ENST00000262056	11.12	chr12:53428493-53431192|chr12:53432195-53433021
chr12:53670403-53671011	0	2	2	2	2	2	chr12	53670403	53671011	+	2	240.145	0.463	circRNA	ESPL1	ENST00000257934	8.9	chr12:53668794-53670403|chr12:53671011-53671253
chr12:537934-547720	0	0	1	2	1	0	chr12	537934	547720	+	5	97,73,89,149,220	0,1895,3097,4405,9566	circRNA	CCDC77	ENST00000540180	4,5,6,7,8	chr12:527802-537934|chr12:547720-549782
chr12:53848509-53865591	0	0	0	0	2	0	chr12	53848509	53865591	+	12	144,24,33,117,132,129,75,42,73,39,56,170	0,621,735,1159,4546,6289,7767,11206,12495,13079,14051,16912	circRNA	PCBP2	ENST00000359282	2,3,4,5,6,7,8,9,10,11,12,13	chr12:53846160-53848509|chr12:53865591-53873189
chr12:54113522-54115967	1	0	2	3	0	0	chr12	54113522	54115967	-	3	91,149,159	0,1728,2286	circRNA	CALCOCO1	NM_020898	7,6,5	chr12:54110199-54113522|chr12:54115967-54117376
chr12:54734330-54737100	0	3	0	1	1	0	chr12	54734330	54737100	+	3	69,82,92	0,1659,2678	circRNA	COPZ1	ENST00000552848	3,4,5	chr12:54718965-54734330|chr12:54737100-54739243
chr12:54767756-54769738	0	0	2	0	0	0	chr12	54767756	54769738	-	2	163.111	0.1871	circRNA	ZNF385A	NM_001290001	3.2	chr12:54764880-54767756|chr12:54769738-54778211
chr12:54910679-54911722	0	0	2	0	0	1	chr12	54910679	54911722	+	3	97,110,133	0,637,910	circRNA	NCKAP1L	NM_005337	11,12,13	chr12:54910079-54910679|chr12:54911722-54912434
chr12:56151166-56154424	0	0	0	0	0	3	chr12	56151166	56154424	-	2	171.9	0.3168	circRNA	SARNP	ENST00000546604	11.1	chr12:56146624-56151166|chr12:56154424-56182858
chr12:56182858-56189860	2	1	3	1	4	0	chr12	56182858	56189860	-	5	69,26,29,74,52	0,1492,5284,5732,6950	circRNA	SARNP	ENST00000546604	9,8,7,6,5	chr12:56154424-56182858|chr12:56189860-56194345
chr12:56182858-56194684	2	3	2	6	2	1	chr12	56182858	56194684	-	7	69,26,29,74,52,68,47	0,1492,5284,5732,6950,11487,11779	circRNA	SARNP	ENST00000546604	9,8,7,6,5,4,3	chr12:56154424-56182858|chr12:56194684-56197412
chr12:56182858-56197512	1	1	2	3	7	3	chr12	56182858	56197512	-	8	69,26,29,74,52,68,47,100	0,1492,5284,5732,6950,11487,11779,14554	circRNA	SARNP	ENST00000546604	9,8,7,6,5,4,3,2	chr12:56154424-56182858|chr12:56197512-56211449
chr12:56184350-56197512	0	0	0	0	2	0	chr12	56184350	56197512	-	7	26,29,74,52,68,47,100	0,3792,4240,5458,9995,10287,13062	circRNA	SARNP	ENST00000546604	8,7,6,5,4,3,2	chr12:56182927-56184350|chr12:56197512-56211449
chr12:56189808-56197512	0	0	0	1	2	0	chr12	56189808	56197512	-	4	52,68,47,100	0,4537,4829,7604	circRNA	SARNP	ENST00000546604	5,4,3,2	chr12:56188664-56189808|chr12:56197512-56211449
chr12:56563312-56563992	1	3	1	2	1	3	chr12	56563312	56563992	-	3	167,136,65	0,247,615	circRNA	SMARCC2	uc001ska.3	25,24,23	chr12:56561978-56563312|chr12:56563992-56565054
chr12:56604080-56604352	0	0	2	0	0	1	chr12	56604080	56604352	-	1	272	0	circRNA	RNF41	NM_001242826	4	chr12:56602082-56604080|chr12:56604352-56607741
chr12:56676203-56676775	0	4	0	1	3	1	chr12	56676203	56676775	-	2	189.132	0.44	circRNA	CS	ENST00000549143	6.5	chr12:56669979-56676203|chr12:56676775-56677575
chr12:56679699-56694004	0	0	0	0	2	0	chr12	56679699	56694004	-	3	108,51,61	0,679,14244	circRNA	CS	ENST00000550655	4,3,2	chr12:56677641-56679699|chr12:56694004-56694129
chr12:56742312-56743420	1	1	0	3	0	0	chr12	56742312	56743420	-	6	95,53,136,99,84,48	0,223,395,634,897,1060	circRNA	STAT2	NM_005419	19,18,17,16,15,14	chr12:56740739-56742312|chr12:56743420-56743880
chr12:56824664-56826308	0	2	2	1	0	1	chr12	56824664	56826308	-	3	88,134,156	0,590,1488	circRNA	TIMELESS	uc001slf.2	9,8,7	chr12:56824065-56824664|chr12:56826308-56826809
chr12:56826809-56828015	0	2	3	4	3	2	chr12	56826809	56828015	-	5	102,63,115,154,158	0,355,512,747,1048	circRNA	TIMELESS	uc001slf.2	6,5,4,3,2	chr12:56826308-56826809|chr12:56828015-56843093
chr12:56956200-56965639	0	1	1	2	2	2	chr12	56956200	56965639	+	4	167,59,92,158	0,6558,7482,9281	circRNA	RBMS2	NM_002898	2,3,4,5	chr12:56915873-56956200|chr12:56965639-56974967
chr12:56997142-56999111	0	4	1	7	8	2	chr12	56997142	56999111	-	5	60,181,75,215,255	0,161,858,1226,1714	circRNA	BAZ2A	uc009zow.1	18,17,16,15,14	chr12:56996641-56997142|chr12:56999111-56999613
chr12:56998000-56999111	1	2	2	1	7	2	chr12	56998000	56999111	-	3	75,215,255	0,368,856	circRNA	BAZ2A	uc009zow.1	16,15,14	chr12:56997484-56998000|chr12:56999111-56999613
chr12:57059987-57066849	1	0	2	5	2	3	chr12	57059987	57066849	-	5	63,90,99,70,114	0,4071,5545,6536,6748	circRNA	PTGES3	uc001slu.4	6,5,4,3,2	chr12:57058584-57059987|chr12:57066849-57081781
chr12:57064058-57066849	4	10	10	10	22	23	chr12	57064058	57066849	-	4	90,99,70,114	0,1474,2465,2677	circRNA	PTGES3	NR_104219	5,4,3,2	chr12:57060050-57064058|chr12:57066849-57081033
chr12:57065532-57066849	0	2	0	2	5	3	chr12	57065532	57066849	-	3	99,70,114	0,991,1203	circRNA	PTGES3	NR_104219	4,3,2	chr12:57064148-57065532|chr12:57066849-57081033
chr12:57127930-57133147	0	0	0	1	1	2	chr12	57127930	57133147	-	3	99,92,70	0,4287,5147	circRNA	PRIM1	NM_000946	12,11,10	chr12:57125518-57127930|chr12:57133147-57135218
chr12:57127930-57137907	0	0	0	1	1	2	chr12	57127930	57137907	-	7	99,92,70,142,92,110,59	0,4287,5147,7288,7599,8840,9918	circRNA	PRIM1	NM_000946	12,11,10,9,8,7,6	chr12:57125518-57127930|chr12:57137907-57139828
chr12:57135218-57137907	1	3	1	1	0	0	chr12	57135218	57137907	-	4	142,92,110,59	0,311,1552,2630	circRNA	PRIM1	NM_000946	9,8,7,6	chr12:57133147-57135218|chr12:57137907-57139828
chr12:57463016-57466695	0	0	3	0	0	3	chr12	57463016	57466695	-	3	73,220,125	0,1440,3554	circRNA	NEMP1	NM_001130963	4,3,2	chr12:57458522-57463016|chr12:57466695-57472401
chr12:57640586-57644976	0	0	0	3	0	0	chr12	57640586	57644976	-	6	98,73,98,268,67,201	0,1322,1902,2237,2767,4189	circRNA	STAC3	ENST00000332782	6,5,4,3,2,1	chr12:57638994-57640586|None
chr12:57660513-57690334	0	0	0	0	3	0	chr12	57660513	57690334	-	12	101,155,161,127,243,102,173,233,54,32,109,141	0,1572,2191,2592,3021,5722,13627,17093,22126,22278,28668,29680	circRNA	R3HDM2	NM_001330122	19,18,17,16,15,14,13,12,11,10,9,8	chr12:57652842-57660513|chr12:57690334-57691110
chr12:57674140-57677839	0	1	0	5	2	2	chr12	57674140	57677839	-	2	173.233	0.3466	circRNA	R3HDM2	uc010srn.1	4.3	chr12:57663777-57674140|chr12:57677839-57689181
chr12:57677606-57677839	0	1	0	3	4	0	chr12	57677606	57677839	-	1	233	0	circRNA	R3HDM2	uc010srn.1	3	chr12:57674313-57677606|chr12:57677839-57689181
chr12:57682791-57690334	1	0	2	4	5	1	chr12	57682791	57690334	-	3	32,109,141	0,6390,7402	circRNA	R3HDM2	NM_001330122	10,9,8	chr12:57682693-57682791|chr12:57690334-57691110
chr12:57689181-57704246	0	2	1	1	1	1	chr12	57689181	57704246	-	8	109,141,60,79,127,87,42,200	0,1012,1929,2691,3953,4696,7777,14865	circRNA	R3HDM2	NM_001330122	9,8,7,6,5,4,3,2	chr12:57682823-57689181|chr12:57704246-57735168
chr12:57868778-57869073	0	2	0	4	3	3	chr12	57868778	57869073	-	1	295	0	ciRNA	ARHGAP9	uc001snz.3	10	chr12:57868756-57869073
chr12:57891939-57892406	0	0	0	3	2	2	chr12	57891939	57892406	+	2	117.204	0.263	circRNA	MARS	uc001sof.1	9.1	chr12:57884427-57891939|chr12:57892406-57894103
chr12:57927735-57928235	0	1	0	1	1	2	chr12	57927735	57928235	-	2	145.161	0.339	circRNA	DCTN2	NM_001348065	7.6	chr12:57927086-57927735|chr12:57928235-57928838
chr12:58339410-58347472	0	1	0	0	3	0	chr12	58339410	58347472	+	4	46,82,138,84	0,1367,6130,7978	circRNA	ATP23	NM_001320408	2,3,4,5	chr12:58335711-58339410|chr12:58347472-58350469
chr12:58340777-58347472	0	2	3	3	4	3	chr12	58340777	58347472	+	3	82,138,84	0,4763,6611	circRNA	ATP23	NM_001320408	3,4,5	chr12:58339456-58340777|chr12:58347472-58350469
chr12:5841685-5860136	0	0	0	0	2	1	chr12	5841685	5860136	-	5	111,12,83,161,135	0,346,6797,11637,18316	circRNA	ANO2	NM_001278596	15,14,13,12,11	chr12:5756967-5841685|chr12:5860136-5908672
chr12:5908672-5941769	0	0	0	2	0	0	chr12	5908672	5941769	-	6	65,42,56,52,55,152	0,6545,7806,28262,30928,32945	circRNA	ANO2	ENST00000327087	10,9,8,7,6,5	chr12:5860136-5908672|chr12:5941769-5963208
chr12:5936934-6031970	1	0	0	6	0	0	chr12	5936934	6031970	-	6	52,55,154,100,327,185	0,2666,4683,26273,93271,94851	circRNA	ANO2	NM_001278596	7,6,5,4,3,2	chr12:5916534-5936934|chr12:6031970-6054361
chr12:5963208-6031970	0	0	0	2	0	0	chr12	5963208	6031970	-	3	99,327,185	0,66997,68577	circRNA	ANO2	ENST00000327087	4,3,2	chr12:5941769-5963208|chr12:6031970-6055316
chr12:6030205-6031970	0	2	0	9	12	2	chr12	6030205	6031970	-	2	327.185	0.158	circRNA	ANO2	NM_001278596	3.2	chr12:5963307-6030205|chr12:6031970-6054361
chr12:6120782-6122811	0	0	0	2	0	0	chr12	6120782	6122811	-	3	178,44,165	0,470,1864	circRNA	VWF	uc001qnn.1	34,33,32	chr12:6105388-6120782|chr12:6122811-6125254
chr12:6120782-6135212	0	0	1	0	3	0	chr12	6120782	6135212	-	12	178,44,165,144,141,117,1379,136,159,157,114,141	0,470,1864,4472,4899,5137,6748,10283,11123,12014,13963,14289	circRNA	VWF	uc001qnn.1	34,33,32,31,30,29,28,27,26,25,24,23	chr12:6105388-6120782|chr12:6135212-6138507
chr12:62687959-62715390	0	0	0	3	0	1	chr12	62687959	62715390	+	4	128,131,127,146	0,8611,20611,27285	circRNA	USP15	ENST00000353364	2,3,4,5	chr12:62654284-62687959|chr12:62715390-62719652
chr12:62687959-62719714	0	3	0	4	1	1	chr12	62687959	62719714	+	5	128,131,127,146,62	0,8611,20611,27285,31693	circRNA	USP15	ENST00000353364	2,3,4,5,6	chr12:62654284-62687959|chr12:62719714-62749111
chr12:62708570-62719714	2	1	1	1	0	2	chr12	62708570	62719714	+	3	127,146,62	0,6674,11082	circRNA	USP15	ENST00000353364	4,5,6	chr12:62696701-62708570|chr12:62719714-62749111
chr12:62708570-62749256	0	4	4	3	3	5	chr12	62708570	62749256	+	4	127,146,62,145	0,6674,11082,40541	circRNA	USP15	ENST00000353364	4,5,6,7	chr12:62696701-62708570|chr12:62749256-62775270
chr12:62715244-62749256	0	1	0	2	6	1	chr12	62715244	62749256	+	3	146,62,145	0,4408,33867	circRNA	USP15	ENST00000353364	5,6,7	chr12:62708697-62715244|chr12:62749256-62775270
chr12:62719652-62749256	0	2	1	0	2	0	chr12	62719652	62749256	+	2	62.145	0.29459	circRNA	USP15	ENST00000353364	6.7	chr12:62715390-62719652|chr12:62749256-62775270
chr12:62743001-62749256	1	0	4	0	0	0	chr12	62743001	62749256	+	2	87.145	0.611	circRNA	USP15	NM_001252078	7.8	chr12:62719714-62743001|chr12:62749256-62775270
chr12:62775270-62778083	0	0	0	0	0	2	chr12	62775270	62778083	+	3	174,159,225	0,2350,2588	circRNA	USP15	ENST00000353364	8,9,10	chr12:62749256-62775270|chr12:62778083-62783210
chr12:62877949-62895478	1	1	2	2	1	2	chr12	62877949	62895478	+	6	64,128,132,130,98,126	0,9745,10846,14749,16613,17403	circRNA	MON2	ENST00000280379	2,3,4,5,6,7	chr12:62861098-62877949|chr12:62895478-62902065
chr12:62892698-62895478	0	1	0	0	2	1	chr12	62892698	62895478	+	3	130,98,126	0,1864,2654	circRNA	MON2	uc001srd.1	2,3,4	chr12:62861098-62892698|chr12:62895478-62902065
chr12:62936876-62946954	0	4	0	1	0	0	chr12	62936876	62946954	+	6	102,3,111,176,163,294	0,1669,1801,3800,6571,9784	circRNA	MON2	ENST00000280379	20,21,22,23,24,25	chr12:62932285-62936876|chr12:62946954-62949773
chr12:64011083-64041145	2	0	0	0	0	2	chr12	64011083	64041145	-	7	87,78,100,92,58,94,121	0,847,3934,6736,9165,27099,29941	circRNA	DPY19L2	NM_173812	11,10,9,8,7,6,5	chr12:64002455-64011083|chr12:64041145-64055123
chr12:64038182-64041145	0	3	2	3	1	4	chr12	64038182	64041145	-	2	94.121	0.2842	circRNA	DPY19L2	NM_173812	6.5	chr12:64020306-64038182|chr12:64041145-64055123
chr12:64038182-64057625	1	0	1	2	0	4	chr12	64038182	64057625	-	4	94,121,138,88	0,2842,16941,19355	circRNA	DPY19L2	NM_173812	6,5,4,3	chr12:64020306-64038182|chr12:64057625-64059614
chr12:64377726-64410792	0	0	0	3	1	1	chr12	64377726	64410792	+	3	196,163,63	0,5963,33003	circRNA	SRGAP1	ENST00000355086	2,3,4	chr12:64238663-64377726|chr12:64410792-64436569
chr12:6442234-6443410	1	2	1	3	3	4	chr12	6442234	6443410	-	4	79,150,129,154	0,298,668,1022	circRNA	TNFRSF1A	ENST00000162749	5,4,3,2	chr12:6440092-6442234|chr12:6443410-6450941
chr12:64803741-64812874	0	2	0	0	0	0	chr12	64803741	64812874	+	5	134,83,57,70,219	0,4945,6736,8084,8914	circRNA	XPOT	ENST00000332707	2,3,4,5,6	chr12:64798584-64803741|chr12:64812874-64813849
chr12:64803741-64821900	0	0	2	0	0	0	chr12	64803741	64821900	+	15	134,83,57,70,219,185,169,237,39,63,125,145,120,95,70	0,4945,6736,8084,8914,10108,10391,11273,13043,13220,14637,15076,15376,15853,18089	circRNA	XPOT	ENST00000332707	2,3,4,5,6,7,8,9,10,11,12,13,14,15,16	chr12:64798584-64803741|chr12:64821900-64823828
chr12:64811825-64812874	0	0	0	2	0	1	chr12	64811825	64812874	+	2	70.219	0.83	circRNA	XPOT	ENST00000332707	5.6	chr12:64810534-64811825|chr12:64812874-64813849
chr12:64816784-64821900	0	0	3	0	0	0	chr12	64816784	64821900	+	7	39,63,125,145,120,95,70	0,177,1594,2033,2333,2810,5046	circRNA	XPOT	ENST00000332707	10,11,12,13,14,15,16	chr12:64815251-64816784|chr12:64821900-64823828
chr12:64816784-64825603	0	0	2	0	1	0	chr12	64816784	64825603	+	9	39,63,125,145,120,95,70,239,286	0,177,1594,2033,2333,2810,5046,7044,8533	circRNA	XPOT	ENST00000332707	10,11,12,13,14,15,16,17,18	chr12:64815251-64816784|chr12:64825603-64827193
chr12:64853968-64868170	0	0	0	0	3	2	chr12	64853968	64868170	+	4	141,130,182,161	0,4145,6712,14041	circRNA	TBK1	ENST00000331710	3,4,5,6	chr12:64849737-64853968|chr12:64868170-64873791
chr12:64878082-64883899	0	0	2	0	0	1	chr12	64878082	64883899	+	5	197,59,92,102,79	0,1152,1623,4184,5738	circRNA	TBK1	ENST00000331710	9,10,11,12,13	chr12:64875801-64878082|chr12:64883899-64889262
chr12:64889262-64891819	0	0	0	2	0	0	chr12	64889262	64891819	+	7	122,77,40,102,97,107,72	0,216,884,1466,1680,2165,2485	circRNA	TBK1	ENST00000331710	14,15,16,17,18,19,20	chr12:64883899-64889262|chr12:64891819-64895109
chr12:65122735-65146537	0	0	2	0	0	0	chr12	65122735	65146537	-	9	102,104,119,83,168,99,66,207,60	0,8048,10425,11650,14185,15853,16703,18756,23742	circRNA	GNS	NM_002076	10,9,8,7,6,5,4,3,2	chr12:65116893-65122735|chr12:65146537-65152864
chr12:65702308-65762806	0	2	0	0	0	0	chr12	65702308	65762806	+	4	127,109,78,29	0,18297,19997,60469	circRNA	MSRB3	ENST00000308259	2,3,4,5	chr12:65672645-65702308|chr12:65762806-65847507
chr12:65720605-65762806	0	2	0	0	1	0	chr12	65720605	65762806	+	3	109,78,29	0,1700,42172	circRNA	MSRB3	ENST00000355192	2,3,4	chr12:65672645-65720605|chr12:65762806-65847507
chr12:6618882-6620418	0	0	0	3	4	2	chr12	6618882	6620418	+	4	76,59,182,143	0,358,912,1393	circRNA	NCAPD2	ENST00000315579	3,4,5,6	chr12:6604391-6618882|chr12:6620418-6623430
chr12:6657590-6657991	0	1	2	1	2	1	chr12	6657590	6657991	-	2	121.158	0.243	circRNA	IFFO1	uc001qoy.3	8.7	chr12:6657326-6657590|chr12:6657991-6658641
chr12:66597490-66605377	0	2	3	0	0	1	chr12	66597490	66605377	+	4	183,65,55,152	0,5745,6436,7735	circRNA	IRAK3	ENST00000261233	2,3,4,5	chr12:66583212-66597490|chr12:66605377-66610950
chr12:66597490-66611015	2	8	7	5	8	2	chr12	66597490	66611015	+	5	183,65,55,152,65	0,5745,6436,7735,13460	circRNA	IRAK3	ENST00000261233	2,3,4,5,6	chr12:66583212-66597490|chr12:66611015-66620502
chr12:66597490-66622150	7	15	27	27	26	22	chr12	66597490	66622150	+	7	183,65,55,152,65,115,119	0,5745,6436,7735,13460,23012,24541	circRNA	IRAK3	ENST00000261233	2,3,4,5,6,7,8	chr12:66583212-66597490|chr12:66622150-66638265
chr12:66603235-66611015	1	3	6	8	0	5	chr12	66603235	66611015	+	4	65,55,152,65	0,691,1990,7715	circRNA	IRAK3	ENST00000261233	3,4,5,6	chr12:66597673-66603235|chr12:66611015-66620502
chr12:66620502-66622150	0	4	5	1	1	2	chr12	66620502	66622150	+	2	115.119	0.1529	circRNA	IRAK3	ENST00000261233	7.8	chr12:66611015-66620502|chr12:66622150-66638265
chr12:6690209-6690980	1	0	3	2	3	3	chr12	6690209	6690980	-	3	130,98,166	0,247,605	circRNA	CHD4	NM_001297553	32,31,30	chr12:6688083-6690209|chr12:6690980-6691302
chr12:6696549-6697588	1	1	2	8	4	4	chr12	6696549	6697588	-	3	176,238,125	0,328,914	circRNA	CHD4	NM_001297553	24,23,22	chr12:6692544-6696549|chr12:6697588-6700631
chr12:6703624-6704596	0	1	0	0	2	0	chr12	6703624	6704596	-	2	192.97	0.875	circRNA	CHD4	NM_001297553	14.13	chr12:6702782-6703624|chr12:6704596-6705171
chr12:68696399-68696652	1	2	4	1	2	7	chr12	68696399	68696652	-	1	253	0	circRNA	MDM1	NM_001205028	12	chr12:68690762-68696399|chr12:68696652-68707222
chr12:68707222-68709045	0	1	1	0	3	0	chr12	68707222	68709045	-	3	110,110,318	0,201,1505	circRNA	MDM1	NM_001205028	11,10,9	chr12:68696652-68707222|chr12:68709045-68709857
chr12:69042478-69048032	0	2	5	3	7	5	chr12	69042478	69048032	+	4	83,69,57,141	0,1701,3296,5413	circRNA	RAP1B	ENST00000250559	2,3,4,5	chr12:69004823-69042478|chr12:69048032-69050085
chr12:69042478-69050997	0	0	3	5	3	2	chr12	69042478	69050997	+	6	83,69,57,141,144,117	0,1701,3296,5413,7607,8402	circRNA	RAP1B	ENST00000250559	2,3,4,5,6,7	chr12:69004823-69042478|chr12:69050997-69053059
chr12:69044179-69045831	0	0	2	1	7	2	chr12	69044179	69045831	+	2	69.57	0.1595	circRNA	RAP1B	ENST00000250559	3.4	chr12:69042561-69044179|chr12:69045831-69047891
chr12:69044179-69048032	3	9	18	37	35	20	chr12	69044179	69048032	+	3	69,57,141	0,1595,3712	circRNA	RAP1B	ENST00000250559	3,4,5	chr12:69042561-69044179|chr12:69048032-69050085
chr12:69044179-69050997	1	0	0	3	3	1	chr12	69044179	69050997	+	5	69,57,141,144,117	0,1595,3712,5906,6701	circRNA	RAP1B	ENST00000250559	3,4,5,6,7	chr12:69042561-69044179|chr12:69050997-69053059
chr12:69047891-69050997	1	1	4	12	9	8	chr12	69047891	69050997	+	3	141,144,117	0,2194,2989	circRNA	RAP1B	ENST00000250559	5,6,7	chr12:69045831-69047891|chr12:69050997-69053059
chr12:69090598-69096564	0	2	0	0	1	1	chr12	69090598	69096564	+	3	104,128,49	0,3907,5917	circRNA	NUP107	ENST00000229179	6,7,8	chr12:69085892-69090598|chr12:69096564-69103017
chr12:69096515-69107588	0	0	0	0	0	2	chr12	69096515	69107588	+	4	49,72,89,79	0,6502,7269,10994	circRNA	NUP107	ENST00000229179	8,9,10,11	chr12:69094633-69096515|chr12:69107588-69109406
chr12:69103784-69109520	0	0	1	2	0	1	chr12	69103784	69109520	+	3	89,79,114	0,3725,5622	circRNA	NUP107	ENST00000229179	10,11,12	chr12:69103089-69103784|chr12:69109520-69113120
chr12:69109406-69119576	0	3	5	8	3	7	chr12	69109406	69119576	+	7	114,91,77,60,146,49,70	0,3714,3951,5491,6214,6477,10100	circRNA	NUP107	ENST00000229179	12,13,14,15,16,17,18	chr12:69107588-69109406|chr12:69119576-69120278
chr12:69109406-69125499	2	1	0	1	4	2	chr12	69109406	69125499	+	11	114,91,77,60,146,49,70,119,39,151,113	0,3714,3951,5491,6214,6477,10100,10872,11724,15483,15980	circRNA	NUP107	ENST00000229179	12,13,14,15,16,17,18,19,20,21,22	chr12:69107588-69109406|chr12:69125499-69126416
chr12:69109406-69126519	0	2	0	0	2	1	chr12	69109406	69126519	+	12	114,91,77,60,146,49,70,119,39,151,113,103	0,3714,3951,5491,6214,6477,10100,10872,11724,15483,15980,17010	circRNA	NUP107	ENST00000229179	12,13,14,15,16,17,18,19,20,21,22,23	chr12:69107588-69109406|chr12:69126519-69127231
chr12:69109406-69135760	0	0	1	3	0	1	chr12	69109406	69135760	+	16	114,91,77,60,146,49,70,119,39,151,113,103,161,126,114,168	0,3714,3951,5491,6214,6477,10100,10872,11724,15483,15980,17010,17825,19081,19604,26186	circRNA	NUP107	ENST00000229179	12,13,14,15,16,17,18,19,20,21,22,23,24,25,26,27	chr12:69107588-69109406|chr12:69135760-69136134
chr12:69210591-69218431	0	2	4	2	10	9	chr12	69210591	69218431	+	4	134,50,68,97	0,3513,7551,7743	circRNA	MDM2	NM_002392	4,5,6,7	chr12:69207408-69210591|chr12:69218431-69222550
chr12:69214104-69218431	0	2	0	1	2	3	chr12	69214104	69218431	+	3	50,68,97	0,4038,4230	circRNA	MDM2	NM_002392	5,6,7	chr12:69210725-69214104|chr12:69218431-69222550
chr12:69214104-69222711	1	0	1	0	2	0	chr12	69214104	69222711	+	2	50.161	0.8446	circRNA	MDM2	NM_001145339	5.6	chr12:69210725-69214104|chr12:69222711-69229608
chr12:69218142-69222711	0	2	1	0	1	2	chr12	69218142	69222711	+	3	68,97,161	0,192,4408	circRNA	MDM2	NM_002392	6,7,8	chr12:69214154-69218142|chr12:69222711-69229608
chr12:69222550-69230529	2	2	2	1	2	5	chr12	69222550	69230529	+	3	161,156,78	0,7058,7901	circRNA	MDM2	NM_001145339	6,7,8	chr12:69214154-69222550|chr12:69230529-69233053
chr12:69644908-69646934	0	0	3	0	0	1	chr12	69644908	69646934	+	2	210.104	0.1922	circRNA	CPSF6	ENST00000435070	2.3	chr12:69633486-69644908|chr12:69646934-69650476
chr12:69644908-69653977	0	0	0	2	0	0	chr12	69644908	69653977	+	7	210,104,146,174,505,116,154	0,1922,5568,6603,7461,8299,8915	circRNA	CPSF6	ENST00000435070	2,3,4,5,6,7,8	chr12:69633486-69644908|chr12:69653977-69656152
chr12:69644908-69656342	17	36	34	27	32	22	chr12	69644908	69656342	+	8	210,104,146,174,505,116,154,190	0,1922,5568,6603,7461,8299,8915,11244	circRNA	CPSF6	ENST00000435070	2,3,4,5,6,7,8,9	chr12:69633486-69644908|chr12:69656342-69663291
chr12:6991359-6993083	0	1	0	3	3	1	chr12	6991359	6993083	+	2	132.216	0.1508	circRNA	RPL13P5	ENST00000421824	2.3	chr12:6982945-6991359|chr12:6993083-6993534
chr12:69983264-69985939	3	6	10	7	11	8	chr12	69983264	69985939	+	2	203.101	0.2574	circRNA	CCT2	ENST00000299300	7.8	chr12:69982042-69983264|chr12:69985939-69986755
chr12:69983264-69987393	4	9	10	6	15	7	chr12	69983264	69987393	+	4	203,101,128,104	0,2574,3491,4025	circRNA	CCT2	ENST00000299300	7,8,9,10	chr12:69982042-69983264|chr12:69987393-69990935
chr12:69985838-69987393	1	0	3	1	1	0	chr12	69985838	69987393	+	3	101,128,104	0,917,1451	circRNA	CCT2	ENST00000299300	8,9,10	chr12:69983467-69985838|chr12:69987393-69990935
chr12:70149163-70150443	0	1	4	5	3	4	chr12	70149163	70150443	+	2	276.259	0.1021	circRNA	RAB3IP	ENST00000247833	2.3	chr12:70132811-70149163|chr12:70150443-70178499
chr12:70193988-70195501	12	33	15	34	43	25	chr12	70193988	70195501	+	2	129.113	0.14	circRNA	RAB3IP	ENST00000247833	7.8	chr12:70189124-70193988|chr12:70195501-70206557
chr12:70671911-70704797	3	9	14	17	14	12	chr12	70671911	70704797	+	2	143.123	0.32763	circRNA	CNOT2	ENST00000552231	2.3	chr12:70637260-70671911|chr12:70704797-70713077
chr12:70671911-70713144	1	2	3	3	6	0	chr12	70671911	70713144	+	3	143,123,67	0,32763,41166	circRNA	CNOT2	ENST00000552231	2,3,4	chr12:70637260-70671911|chr12:70713144-70723202
chr12:70671911-70724249	0	0	1	4	1	0	chr12	70671911	70724249	+	5	143,123,67,148,183	0,32763,41166,51291,52155	circRNA	CNOT2	ENST00000552231	2,3,4,5,6	chr12:70637260-70671911|chr12:70724249-70726546
chr12:70687850-70704797	0	0	1	2	1	1	chr12	70687850	70704797	+	2	224.123	0.16824	circRNA	CNOT2	ENST00000552483	4.5	chr12:70684583-70687850|chr12:70704797-70713077
chr12:70688016-70713144	0	1	0	2	0	0	chr12	70688016	70713144	+	3	58,123,67	0,16658,25061	circRNA	CNOT2	ENST00000552319	3,4,5	chr12:70672054-70688016|chr12:70713144-70723202
chr12:72020039-72022817	1	3	4	4	2	9	chr12	72020039	72022817	-	3	187,184,120	0,1491,2658	circRNA	ZFC3H1	ENST00000378743	22,21,20	chr12:72018072-72020039|chr12:72022817-72023388
chr12:72163579-72167802	3	3	3	7	5	5	chr12	72163579	72167802	+	3	60,108,64	0,792,4159	circRNA	RAB21	NM_014999	2,3,4	chr12:72149068-72163579|chr12:72167802-72175810
chr12:72265849-72274387	0	0	0	0	0	2	chr12	72265849	72274387	+	3	99,75,139	0,859,8399	circRNA	TBC1D15	ENST00000482439	3,4,5	chr12:72235011-72265849|chr12:72274387-72278590
chr12:7556130-7586290	0	2	0	0	0	0	chr12	7556130	7586290	-	4	321,321,321,321	0,2997,28881,29839	circRNA	CD163L1	ENST00000313599	6,5,4,3	chr12:7551180-7556130|chr12:7586290-7593749
chr12:76442979-76468019	0	0	0	1	3	0	chr12	76442979	76468019	-	13	51,30,123,20,146,140,72,129,81,142,103,86,37	0,556,1331,3891,4005,4570,5819,6833,10598,10938,18171,19709,25003	circRNA	NAP1L1	NM_001330231	14,13,12,11,10,9,8,7,6,5,4,3,2	chr12:76442244-76442979|chr12:76468019-76478346
chr12:76448798-76454059	0	0	0	1	2	1	chr12	76448798	76454059	-	4	72,129,81,142	0,1014,4779,5119	circRNA	NAP1L1	NM_001330231	8,7,6,5	chr12:76447689-76448798|chr12:76454059-76461150
chr12:76453577-76454059	0	0	2	0	0	1	chr12	76453577	76454059	-	2	81.142	0.34	circRNA	NAP1L1	NM_001330231	6.5	chr12:76449941-76453577|chr12:76454059-76461150
chr12:76453577-76468019	0	0	0	0	2	0	chr12	76453577	76468019	-	5	81,142,103,86,37	0,340,7573,9111,14405	circRNA	NAP1L1	NM_001330231	6,5,4,3,2	chr12:76449941-76453577|chr12:76468019-76478346
chr12:76844630-76881398	0	1	0	0	4	3	chr12	76844630	76881398	-	2	138.109	0.36659	circRNA	OSBPL8	ENST00000393249	6.5	chr12:76804414-76844630|chr12:76881398-76928013
chr12:76881289-76931766	0	1	0	1	2	0	chr12	76881289	76931766	-	4	109,48,38,30	0,46724,49494,50447	circRNA	OSBPL8	ENST00000393249	5,4,3,2	chr12:76844768-76881289|chr12:76931766-76953176
chr12:77191213-77216311	0	1	0	2	3	1	chr12	77191213	77216311	+	7	104,123,78,145,65,163,126	0,7883,11609,12279,17712,18423,24972	circRNA	ZDHHC17	ENST00000334822	2,3,4,5,6,7,8	chr12:77158109-77191213|chr12:77216311-77220687
chr12:77214837-77216311	3	1	2	1	0	1	chr12	77214837	77216311	+	2	110.126	0.1348	circRNA	ZDHHC17	uc001syj.2	7.8	chr12:77209799-77214837|chr12:77216311-77220687
chr12:80175594-80182563	0	1	3	0	2	0	chr12	80175594	80182563	-	3	48,105,2007	0,4559,4962	circRNA	PPP1R12A	uc001syy.3	4,3,2	chr12:80173131-80175594|chr12:80182563-80184246
chr12:80187642-80215970	4	0	1	3	7	3	chr12	80187642	80215970	-	14	66,122,169,201,91,177,168,105,95,216,125,158,89,75	0,1775,2919,3332,4631,11729,12303,13363,14620,15932,23531,26911,27215,28253	circRNA	PPP1R12A	NM_001143886	19,18,17,16,15,14,13,12,11,10,9,8,7,6	chr12:80184263-80187642|chr12:80215970-80222099
chr12:80199945-80215970	0	0	0	2	0	0	chr12	80199945	80215970	-	8	168,105,95,216,125,158,89,75	0,1060,2317,3629,11228,14608,14912,15950	circRNA	PPP1R12A	NM_001143886	13,12,11,10,9,8,7,6	chr12:80199548-80199945|chr12:80215970-80222099
chr12:80211173-80239200	0	0	0	1	2	0	chr12	80211173	80239200	-	7	125,158,89,75,145,160,119	0,3380,3684,4722,10926,14938,27908	circRNA	PPP1R12A	NM_001143886	9,8,7,6,5,4,3	chr12:80203790-80211173|chr12:80239200-80266587
chr12:80214553-80215970	0	1	0	5	2	2	chr12	80214553	80215970	-	3	158,89,75	0,304,1342	circRNA	PPP1R12A	NM_001143886	8,7,6	chr12:80211298-80214553|chr12:80215970-80222099
chr12:80214857-80222244	0	0	0	0	2	0	chr12	80214857	80222244	-	3	89,75,145	0,1038,7242	circRNA	PPP1R12A	NM_001143886	7,6,5	chr12:80214711-80214857|chr12:80222244-80226111
chr12:80222099-80239200	0	0	0	0	3	0	chr12	80222099	80239200	-	3	145,160,119	0,4012,16982	circRNA	PPP1R12A	NM_001143886	5,4,3	chr12:80215970-80222099|chr12:80239200-80266587
chr12:8082279-8083238	0	0	0	2	3	1	chr12	8082279	8083238	-	2	188.163	0.796	circRNA	SLC2A3	NM_006931	6.5	chr12:8078544-8082279|chr12:8083238-8083840
chr12:82763165-82796909	1	9	4	4	5	5	chr12	82763165	82796909	+	5	174,165,107,600,148	0,17416,20429,29408,33596	circRNA	METTL25	NM_001347934	2,3,4,5,6	chr12:82752603-82763165|chr12:82796909-82824671
chr12:82763165-82832570	0	1	2	0	0	0	chr12	82763165	82832570	+	8	174,165,107,600,148,95,30,74	0,17416,20429,29408,33596,61506,65308,69331	circRNA	METTL25	NM_001347934	2,3,4,5,6,7,8,9	chr12:82752603-82763165|chr12:82832570-82850505
chr12:82763165-82850599	0	0	7	1	1	1	chr12	82763165	82850599	+	9	174,165,107,600,148,95,30,74,94	0,17416,20429,29408,33596,61506,65308,69331,87340	circRNA	METTL25	NM_001347934	2,3,4,5,6,7,8,9,10	chr12:82752603-82763165|chr12:82850599-82870422
chr12:82780581-82783701	0	0	1	0	2	2	chr12	82780581	82783701	+	2	165.107	0.3013	circRNA	METTL25	ENST00000248306	2.3	chr12:82752603-82780581|chr12:82783701-82792573
chr12:88490664-88508959	0	0	2	0	0	0	chr12	88490664	88508959	-	9	112,174,231,103,116,150,165,143,85	0,5950,9787,10108,12178,14314,14806,17532,18210	circRNA	CEP290	NM_025114	27,26,25,24,23,22,21,20,19	chr12:88487752-88490664|chr12:88508959-88510809
chr12:88500451-88500875	1	2	0	1	0	1	chr12	88500451	88500875	-	2	231.103	0.321	circRNA	CEP290	NM_025114	25.24	chr12:88496788-88500451|chr12:88500875-88502842
chr12:88500451-88502958	0	0	0	0	2	0	chr12	88500451	88502958	-	3	231,103,116	0,321,2391	circRNA	CEP290	NM_025114	25,24,23	chr12:88496788-88500451|chr12:88502958-88504978
chr12:88542064-88570096	0	0	4	2	2	4	chr12	88542064	88570096	+	10	217,219,100,116,173,253,149,124,121,112	0,5003,6000,11826,12391,18042,24309,24678,26319,27920	circRNA	TMTC3	ENST00000547034	2,3,4,5,6,7,8,9,10,11	chr12:88536264-88542064|chr12:88570096-88582619
chr12:89853414-89866052	1	0	3	5	5	1	chr12	89853414	89866052	-	6	81,153,69,134,116,108	0,7132,7979,10723,11976,12530	circRNA	POC1B	ENST00000393179	8,7,6,5,4,3	chr12:89819156-89853414|chr12:89866052-89885712
chr12:89860546-89866052	1	1	2	2	2	0	chr12	89860546	89866052	-	5	153,69,134,116,108	0,847,3591,4844,5398	circRNA	POC1B	ENST00000393179	7,6,5,4,3	chr12:89853495-89860546|chr12:89866052-89885712
chr12:89885712-89891119	0	0	2	1	3	2	chr12	89885712	89891119	-	2	180.172	0.5235	circRNA	POC1B	ENST00000313546	4.3	chr12:89866052-89885712|chr12:89891119-89918896
chr12:90003713-90029028	1	0	0	0	2	1	chr12	90003713	90029028	-	12	107,88,180,238,242,243,215,162,39,141,126,255	0,484,1256,6865,10062,11612,14246,16517,17741,20568,24841,25060	circRNA	ATP2B1	NM_001001323	14,13,12,11,10,9,8,7,6,5,4,3	chr12:89998123-90003713|chr12:90029028-90035934
chr12:9096000-9096506	0	1	1	5	0	1	chr12	9096000	9096506	-	2	131.11	0.396	circRNA	M6PR	NM_002355	5.4	chr12:9095138-9096000|chr12:9096506-9098013
chr12:922807-939326	4	2	3	4	3	5	chr12	922807	939326	+	3	173,221,158	0,13400,16361	circRNA	WNK1	ENST00000535572	2,3,4	chr12:863490-922807|chr12:939326-966326
chr12:93219941-93246801	0	0	2	0	0	0	chr12	93219941	93246801	-	7	120,150,339,117,156,122,114	0,1746,6346,16299,24945,26009,26746	circRNA	EEA1	ENST00000322349	13,12,11,10,9,8,7	chr12:93213287-93219941|chr12:93246801-93247690
chr12:93226287-93246801	0	3	4	1	1	1	chr12	93226287	93246801	-	5	339,117,156,122,114	0,9953,18599,19663,20400	circRNA	EEA1	ENST00000322349	11,10,9,8,7	chr12:93221837-93226287|chr12:93246801-93247690
chr12:93236240-93251261	0	1	0	0	2	0	chr12	93236240	93251261	-	7	117,156,122,114,40,66,55	0,8646,9710,10447,11450,14810,14966	circRNA	EEA1	ENST00000322349	10,9,8,7,6,5,4	chr12:93226626-93236240|chr12:93251261-93258635
chr12:93244886-93246801	1	0	2	1	0	1	chr12	93244886	93246801	-	3	156,122,114	0,1064,1801	circRNA	EEA1	ENST00000322349	9,8,7	chr12:93236357-93244886|chr12:93246801-93247690
chr12:936207-939326	2	0	1	1	5	1	chr12	936207	939326	+	2	221.158	0.2961	circRNA	WNK1	ENST00000535572	3.4	chr12:922980-936207|chr12:939326-966326
chr12:94562928-94580249	9	11	4	4	2	1	chr12	94562928	94580249	+	3	141,135,101	0,12293,17220	circRNA	PLXNC1	ENST00000258526	2,3,4	chr12:94543809-94562928|chr12:94580249-94603365
chr12:94613791-94621011	1	3	0	2	0	0	chr12	94613791	94621011	+	4	148,88,103,87	0,4212,6589,7133	circRNA	PLXNC1	ENST00000258526	6,7,8,9	chr12:94603480-94613791|chr12:94621011-94631439
chr12:95451328-95451654	0	3	1	0	0	0	chr12	95451328	95451654	-	2	91.148	0.178	circRNA	NR2C1	NM_003297	7.6	chr12:95445719-95451328|chr12:95451654-95452085
chr12:95660132-95681633	0	0	2	0	0	0	chr12	95660132	95681633	+	5	276,138,148,332,194	0,3694,8385,15956,21307	circRNA	VEZT	ENST00000436874	5,6,7,8,9	chr12:95656857-95660132|chr12:95681633-95688047
chr12:95676088-95676420	0	0	0	2	1	0	chr12	95676088	95676420	+	1	332	0	circRNA	VEZT	ENST00000436874	8	chr12:95668665-95676088|chr12:95676420-95681439
chr12:95681439-95690034	0	2	1	5	0	1	chr12	95681439	95690034	+	3	194,101,208	0,6608,8387	circRNA	VEZT	ENST00000436874	9,10,11	chr12:95676420-95681439|chr12:95690034-95693940
chr12:95688047-95690034	0	3	5	2	3	3	chr12	95688047	95690034	+	2	101.208	0.1779	circRNA	VEZT	ENST00000436874	10.11	chr12:95681633-95688047|chr12:95690034-95693940
chr12:95887831-95889874	1	2	5	2	1	2	chr12	95887831	95889874	+	3	162,182,95	0,901,1948	circRNA	METAP2	ENST00000535095	5,6,7	chr12:95879757-95887831|chr12:95889874-95897840
chr12:95887831-95897937	0	2	0	1	0	1	chr12	95887831	95897937	+	4	162,182,95,97	0,901,1948,10009	circRNA	METAP2	ENST00000535095	5,6,7,8	chr12:95879757-95887831|chr12:95897937-95906576
chr12:96688776-96692761	0	0	0	0	2	1	chr12	96688776	96692761	-	4	124,63,95,115	0,2271,2628,3870	circRNA	CDK17	ENST00000261211	10,9,8,7	chr12:96683065-96688776|chr12:96692761-96694081
chr12:96688776-96694138	0	1	0	3	0	0	chr12	96688776	96694138	-	5	124,63,95,115,57	0,2271,2628,3870,5305	circRNA	CDK17	ENST00000261211	10,9,8,7,6	chr12:96683065-96688776|chr12:96694138-96704829
chr12:96704829-96728643	1	5	4	3	5	4	chr12	96704829	96728643	-	4	126,134,165,147	0,2269,12896,23667	circRNA	CDK17	ENST00000261211	5,4,3,2	chr12:96694138-96704829|chr12:96728643-96793763
chr12:96717725-96728643	0	4	5	6	3	7	chr12	96717725	96728643	-	2	165.147	0.10771	circRNA	CDK17	ENST00000261211	3.2	chr12:96707232-96717725|chr12:96728643-96793763
chr12:970178-980514	0	0	0	0	2	0	chr12	970178	980514	+	3	331,188,84	0,1070,10252	circRNA	WNK1	ENST00000535572	7,8,9	chr12:968630-970178|chr12:980514-987380
chr12:97313762-97331171	0	0	2	1	0	0	chr12	97313762	97331171	+	4	141,230,202,196	0,14991,16626,17213	circRNA	NEDD1	ENST00000266742	6,7,8,9	chr12:97311515-97313762|chr12:97331171-97334186
chr12:987377-991239	0	0	0	2	0	0	chr12	987377	991239	+	5	150,459,279,98,163	0,1361,2509,3480,3699	circRNA	WNK1	ENST00000315939	10,11,12,13,14	chr12:980514-987377|chr12:991239-992108
chr12:98921663-98931350	0	4	7	4	6	7	chr12	98921663	98931350	+	3	127,159,98	0,3794,9589	circRNA	TMPO	ENST00000556029	2,3,4	chr12:98909924-98921663|chr12:98931350-98938007
chr12:99071202-99080651	1	0	1	3	1	1	chr12	99071202	99080651	+	4	127,126,132,126	0,2852,5718,9323	circRNA	APAF1	ENST00000551964	13,14,15,16	chr12:99065497-99071202|chr12:99080651-99093185
chr12:99071202-99093347	0	0	0	2	0	0	chr12	99071202	99093347	+	5	127,126,132,126,162	0,2852,5718,9323,21983	circRNA	APAF1	ENST00000551964	13,14,15,16,17	chr12:99065497-99071202|chr12:99093347-99097148
chr13:100181720-100190117	0	1	4	0	0	0	chr13	100181720	100190117	+	3	128,130,125	0,7141,8272	circRNA	TM9SF2	NM_004800	4,5,6	chr13:100172383-100181720|chr13:100190117-100191699
chr13:100191699-100196249	0	1	0	0	1	2	chr13	100191699	100196249	+	4	112,80,109,133	0,1268,2113,4417	circRNA	TM9SF2	NM_004800	7,8,9,10	chr13:100190117-100191699|chr13:100196249-100199238
chr13:100206557-100207901	0	1	0	0	0	2	chr13	100206557	100207901	+	2	152.112	0.1232	circRNA	TM9SF2	NM_004800	14.15	chr13:100204580-100206557|chr13:100207901-100211616
chr13:100909848-100925600	3	5	4	12	11	3	chr13	100909848	100925600	+	4	79,103,95,151	0,5134,11094,15601	circRNA	PCCA	NM_001352609	9,10,11,12	chr13:100888132-100909848|chr13:100925600-100953713
chr13:100909848-100962162	1	0	1	0	2	0	chr13	100909848	100962162	+	8	79,103,95,151,144,75,69,76	0,5134,11094,15601,43865,45329,49597,52238	circRNA	PCCA	NM_001352609	9,10,11,12,13,14,15,16	chr13:100888132-100909848|chr13:100962162-100982814
chr13:100953713-100962162	1	3	4	4	5	1	chr13	100953713	100962162	+	4	144,75,69,76	0,1464,5732,8373	circRNA	PCCA	NM_001352609	13,14,15,16	chr13:100925600-100953713|chr13:100962162-100982814
chr13:100953713-101020828	0	1	2	1	3	0	chr13	100953713	101020828	+	7	144,75,69,76,111,103,103	0,1464,5732,8373,29101,38697,67012	circRNA	PCCA	NM_001352609	13,14,15,16,17,18,19	chr13:100925600-100953713|chr13:101020828-101077886
chr13:100958004-100992513	0	0	2	1	0	1	chr13	100958004	100992513	+	5	84,69,76,111,103	0,1441,4082,24810,34406	circRNA	PCCA	NR_148027	15,16,17,18,19	chr13:100955252-100958004|chr13:100992513-101020725
chr13:100959445-101020828	0	3	2	1	1	0	chr13	100959445	101020828	+	5	69,76,111,103,103	0,2641,23369,32965,61280	circRNA	PCCA	NM_001352609	15,16,17,18,19	chr13:100955252-100959445|chr13:101020828-101077886
chr13:100982814-101020828	0	1	3	3	0	0	chr13	100982814	101020828	+	3	111,103,103	0,9596,37911	circRNA	PCCA	NM_001352609	17,18,19	chr13:100962162-100982814|chr13:101020828-101077886
chr13:101315217-101322823	0	0	2	0	0	0	chr13	101315217	101322823	-	4	217,116,216,210	0,1257,5615,7396	circRNA	TMTC4	NM_001350571	5,4,3,2	chr13:101308722-101315217|chr13:101322823-101326997
chr13:103268745-103275390	0	3	1	1	2	1	chr13	103268745	103275390	+	3	105,125,164	0,2326,6481	circRNA	TPP2	uc001vpi.4	4,5,6	chr13:103266546-103268745|chr13:103275390-103279361
chr13:103271071-103275390	0	0	4	1	0	2	chr13	103271071	103275390	+	2	125.164	0.4155	circRNA	TPP2	uc001vpi.4	5.6	chr13:103268850-103271071|chr13:103275390-103279361
chr13:103275226-103279516	1	0	2	1	3	2	chr13	103275226	103279516	+	2	164.155	0.4135	circRNA	TPP2	uc001vpi.4	6.7	chr13:103271196-103275226|chr13:103279516-103280197
chr13:103275226-103280274	2	8	8	16	13	6	chr13	103275226	103280274	+	3	164,155,77	0,4135,4971	circRNA	TPP2	uc001vpi.4	6,7,8	chr13:103271196-103275226|chr13:103280274-103281831
chr13:103279361-103289589	0	4	0	3	2	0	chr13	103279361	103289589	+	8	155,77,128,100,149,116,169,158	0,836,2470,3084,6938,8575,9212,10070	circRNA	TPP2	uc001vpi.4	7,8,9,10,11,12,13,14	chr13:103275390-103279361|chr13:103289589-103290588
chr13:103279361-103309557	0	1	1	5	3	3	chr13	103279361	103309557	+	18	155,77,128,100,149,116,169,158,77,107,155,117,101,97,138,245,79,152	0,836,2470,3084,6938,8575,9212,10070,11227,13258,16210,17545,17897,19282,20195,21895,22396,30044	circRNA	TPP2	uc001vpi.4	7,8,9,10,11,12,13,14,15,16,17,18,19,20,21,22,23,24	chr13:103275390-103279361|chr13:103309557-103315997
chr13:103290588-103299694	0	2	1	0	2	2	chr13	103290588	103299694	+	7	77,107,155,117,101,97,138	0,2031,4983,6318,6670,8055,8968	circRNA	TPP2	uc001vpi.4	15,16,17,18,19,20,21	chr13:103289589-103290588|chr13:103299694-103301256
chr13:103309405-103317275	0	0	1	0	2	1	chr13	103309405	103317275	+	3	152,97,131	0,6592,7739	circRNA	TPP2	uc001vpi.4	24,25,26	chr13:103301836-103309405|chr13:103317275-103326632
chr13:103459495-103474509	0	1	0	0	2	1	chr13	103459495	103474509	+	5	600,127,96,105,95	0,9282,13891,14597,14919	circRNA	BIVM	ENST00000257336	3,4,5,6,7	chr13:103457740-103459495|chr13:103474509-103483914
chr13:103459495-103486902	0	1	0	3	0	0	chr13	103459495	103486902	+	7	600,127,96,105,95,133,87	0,9282,13891,14597,14919,24419,27320	circRNA	BIVM	ENST00000257336	3,4,5,6,7,8,9	chr13:103457740-103459495|chr13:103486902-103490992
chr13:103468777-103474509	0	3	0	0	3	1	chr13	103468777	103474509	+	4	127,96,105,95	0,4609,5315,5637	circRNA	BIVM	ENST00000257336	4,5,6,7	chr13:103460095-103468777|chr13:103474509-103483914
chr13:107209395-107212005	4	1	0	1	4	4	chr13	107209395	107212005	-	2	84.226	0.2384	circRNA	ARGLU1	ENST00000400198	3.2	chr13:107196508-107209395|chr13:107212005-107219920
chr13:111274562-111276626	0	6	3	3	2	4	chr13	111274562	111276626	+	2	151.46	0.2018	circRNA	CARKD	uc001vqz.3	2.3	chr13:111267994-111274562|chr13:111276626-111277536
chr13:111274562-111279894	0	1	1	2	1	1	chr13	111274562	111279894	+	2	151.109	0.5223	circRNA	CARKD	uc010tji.2	2.3	chr13:111267994-111274562|chr13:111279894-111286891
chr13:111315797-111335481	0	0	0	2	0	0	chr13	111315797	111335481	-	4	68,134,130,84	0,3889,13523,19600	circRNA	CARS2	uc001vrd.2	9,8,7,6	chr13:111303447-111315797|chr13:111335481-111340067
chr13:111806251-111885640	0	0	0	0	2	0	chr13	111806251	111885640	+	5	87,85,131,202,89	0,51384,55967,63774,79300	circRNA	ARHGEF7	ENST00000317133	2,3,4,5,6	chr13:111768038-111806251|chr13:111885640-111896218
chr13:111806251-111920017	0	0	0	3	1	0	chr13	111806251	111920017	+	8	87,85,131,202,89,95,96,123	0,51384,55967,63774,79300,89967,90294,113643	circRNA	ARHGEF7	ENST00000317133	2,3,4,5,6,7,8,9	chr13:111768038-111806251|chr13:111920017-111926160
chr13:111857635-111862349	0	1	0	2	1	3	chr13	111857635	111862349	+	2	85.131	0.4583	circRNA	ARHGEF7	ENST00000317133	3.4	chr13:111806338-111857635|chr13:111862349-111870025
chr13:111857635-111870227	1	1	3	5	3	5	chr13	111857635	111870227	+	3	85,131,202	0,4583,12390	circRNA	ARHGEF7	ENST00000317133	3,4,5	chr13:111806338-111857635|chr13:111870227-111885551
chr13:111857635-111885640	1	3	2	9	11	4	chr13	111857635	111885640	+	4	85,131,202,89	0,4583,12390,27916	circRNA	ARHGEF7	ENST00000317133	3,4,5,6	chr13:111806338-111857635|chr13:111885640-111896218
chr13:111857635-111896641	0	0	0	1	2	2	chr13	111857635	111896641	+	6	85,131,202,89,95,96	0,4583,12390,27916,38583,38910	circRNA	ARHGEF7	ENST00000317133	3,4,5,6,7,8	chr13:111806338-111857635|chr13:111896641-111919894
chr13:111857635-111920017	0	0	1	0	2	0	chr13	111857635	111920017	+	7	85,131,202,89,95,96,123	0,4583,12390,27916,38583,38910,62259	circRNA	ARHGEF7	ENST00000317133	3,4,5,6,7,8,9	chr13:111806338-111857635|chr13:111920017-111926160
chr13:111862218-111870227	0	0	1	1	3	0	chr13	111862218	111870227	+	2	131.202	0.7807	circRNA	ARHGEF7	ENST00000317133	4.5	chr13:111857720-111862218|chr13:111870227-111885551
chr13:111862218-111885640	1	0	1	2	2	0	chr13	111862218	111885640	+	3	131,202,89	0,7807,23333	circRNA	ARHGEF7	ENST00000317133	4,5,6	chr13:111857720-111862218|chr13:111885640-111896218
chr13:111870025-111885640	1	1	1	4	5	2	chr13	111870025	111885640	+	2	202.89	0.15526	circRNA	ARHGEF7	ENST00000317133	5.6	chr13:111862349-111870025|chr13:111885640-111896218
chr13:111870025-111896641	1	2	1	4	3	1	chr13	111870025	111896641	+	4	202,89,95,96	0,15526,26193,26520	circRNA	ARHGEF7	ENST00000317133	5,6,7,8	chr13:111862349-111870025|chr13:111896641-111919894
chr13:113153358-113181798	0	0	0	0	1	2	chr13	113153358	113181798	-	9	141,132,89,136,69,136,190,109,111	0,4987,5581,17395,19930,20841,23275,27897,28329	circRNA	TUBGCP3	NM_001286277	20,19,18,17,16,15,14,13,12	chr13:113144011-113153358|chr13:113181798-113200012
chr13:113158345-113181798	0	0	3	3	4	0	chr13	113158345	113181798	-	8	132,89,136,69,136,190,109,111	0,594,12408,14943,15854,18288,22910,23342	circRNA	TUBGCP3	NM_001286277	19,18,17,16,15,14,13,12	chr13:113153499-113158345|chr13:113181798-113200012
chr13:113170753-113181798	7	13	22	18	13	14	chr13	113170753	113181798	-	6	136,69,136,190,109,111	0,2535,3446,5880,10502,10934	circRNA	TUBGCP3	NM_001286277	17,16,15,14,13,12	chr13:113159028-113170753|chr13:113181798-113200012
chr13:113208370-113213713	0	0	0	0	2	0	chr13	113208370	113213713	-	5	126,119,173,188,78	0,830,1995,4139,5265	circRNA	TUBGCP3	NM_001286277	8,7,6,5,4	chr13:113202490-113208370|chr13:113213713-113219424
chr13:113208370-113223573	0	1	2	1	3	0	chr13	113208370	113223573	-	7	126,119,173,188,78,68,108	0,830,1995,4139,5265,11054,15095	circRNA	TUBGCP3	NM_001286277	8,7,6,5,4,3,2	chr13:113202490-113208370|chr13:113223573-113242218
chr13:113891136-113915073	0	0	2	1	0	0	chr13	113891136	113915073	+	11	68,119,193,105,111,86,108,114,106,173,153	0,2610,6145,7587,8126,8329,9133,16259,17870,18130,23784	circRNA	CUL4A	NM_001278513	9,10,11,12,13,14,15,16,17,18,19	chr13:113889459-113891136|chr13:113915073-113917800
chr13:113897281-113898828	0	0	0	1	2	0	chr13	113897281	113898828	+	2	193.105	0.1442	circRNA	CUL4A	NM_001278513	11.12	chr13:113893865-113897281|chr13:113898828-113899262
chr13:113960799-113965182	0	2	0	2	3	1	chr13	113960799	113965182	+	3	122,220,159	0,3158,4224	circRNA	LAMP1	NM_005561	2,3,4	chr13:113951810-113960799|chr13:113965182-113973783
chr13:113963957-113965182	0	0	2	0	1	1	chr13	113963957	113965182	+	2	220.159	0.1066	circRNA	LAMP1	NM_005561	3.4	chr13:113960921-113963957|chr13:113965182-113973783
chr13:114157810-114175048	0	2	2	1	2	0	chr13	114157810	114175048	+	3	93,187,118	0,6742,17120	circRNA	TMCO3	NM_001349741	6,7,8	chr13:114156195-114157810|chr13:114175048-114188359
chr13:114164552-114193822	1	1	0	3	2	1	chr13	114164552	114193822	+	4	187,118,196,151	0,10378,23807,29119	circRNA	TMCO3	NM_001349742	6,7,8,9	chr13:114157903-114164552|chr13:114193822-114201614
chr13:114174930-114193822	0	2	0	2	3	2	chr13	114174930	114193822	+	3	118,196,151	0,13429,18741	circRNA	TMCO3	NM_001349742	7,8,9	chr13:114164739-114174930|chr13:114193822-114201614
chr13:114806475-114822949	2	7	10	12	17	17	chr13	114806475	114822949	-	4	95,104,224,242	0,11051,15455,16232	circRNA	RASA3	uc001vuj.3	6,5,4,3	chr13:114795363-114806475|chr13:114822949-114839194
chr13:114806475-114839312	3	6	9	25	45	18	chr13	114806475	114839312	-	3	95,104,118	0,11051,32719	circRNA	RASA3	uc010tkk.2	4,3,2	chr13:114795363-114806475|chr13:114839312-114843277
chr13:114817526-114822949	0	1	6	6	8	11	chr13	114817526	114822949	-	3	104,224,242	0,4404,5181	circRNA	RASA3	uc001vuj.3	5,4,3	chr13:114806570-114817526|chr13:114822949-114839194
chr13:114817526-114839312	1	1	1	3	2	3	chr13	114817526	114839312	-	2	104.118	0.21668	circRNA	RASA3	uc010tkk.2	3.2	chr13:114806570-114817526|chr13:114839312-114843277
chr13:115016023-115030715	0	0	0	0	3	0	chr13	115016023	115030715	+	6	126,153,64,62,136,91	0,6529,8786,11338,12330,14601	circRNA	CDC16	NM_001078645	12,13,14,15,16,17	chr13:115012479-115016023|chr13:115030715-115037658
chr13:20235837-20244503	1	3	1	3	1	3	chr13	20235837	20244503	+	5	141,87,155,155,128	0,1342,4727,6679,8538	circRNA	MPHOSPH8	ENST00000414242	8,9,10,11,12	chr13:20233429-20235837|chr13:20244503-20244979
chr13:20304378-20356931	4	8	9	8	8	5	chr13	20304378	20356931	-	6	106,85,197,96,302,406	0,11326,21032,29084,42003,52147	circRNA	PSPC1	NM_001042414	7,6,5,4,3,2	chr13:20283739-20304378|chr13:20356931-20357056
chr13:20315704-20333558	0	2	0	2	1	3	chr13	20315704	20333558	-	3	85,197,96	0,9706,17758	circRNA	PSPC1	NR_003272	5,4,3	chr13:20304484-20315704|chr13:20333558-20346381
chr13:20425494-20426330	0	6	3	11	14	10	chr13	20425494	20426330	-	1	836	0	circRNA	ZMYM5	ENST00000535942	3	chr13:20411961-20425494|chr13:20426330-20436538
chr13:20534097-20580726	0	2	0	1	0	1	chr13	20534097	20580726	+	5	69,857,286,166,213	0,33105,42892,45116,46416	circRNA	ZMYM2	NM_001353159	2,3,4,5,6	chr13:20531588-20534097|chr13:20580726-20593686
chr13:20534097-20593758	0	2	0	1	2	1	chr13	20534097	20593758	+	6	69,857,286,166,213,72	0,33105,42892,45116,46416,59589	circRNA	ZMYM2	NM_001353159	2,3,4,5,6,7	chr13:20531588-20534097|chr13:20593758-20600751
chr13:20567202-20568059	0	2	1	5	6	1	chr13	20567202	20568059	+	1	857	0	circRNA	ZMYM2	NM_001353159	3	chr13:20534166-20567202|chr13:20568059-20576989
chr13:20567202-20580726	0	0	2	0	2	2	chr13	20567202	20580726	+	4	857,286,166,213	0,9787,12011,13311	circRNA	ZMYM2	NM_001353159	3,4,5,6	chr13:20534166-20567202|chr13:20580726-20593686
chr13:20576989-20580726	1	2	2	4	5	2	chr13	20576989	20580726	+	3	286,166,213	0,2224,3524	circRNA	ZMYM2	NM_001353159	4,5,6	chr13:20568059-20576989|chr13:20580726-20593686
chr13:20579213-20611049	0	0	0	1	0	2	chr13	20579213	20611049	+	8	166,213,72,151,116,117,151,173	0,1300,14473,21538,22129,26245,29180,31663	circRNA	ZMYM2	NM_001353159	5,6,7,8,9,10,11,12	chr13:20577275-20579213|chr13:20611049-20625572
chr13:20600751-20611049	1	4	2	4	3	3	chr13	20600751	20611049	+	5	151,116,117,151,173	0,591,4707,7642,10125	circRNA	ZMYM2	NM_001353159	8,9,10,11,12	chr13:20593758-20600751|chr13:20611049-20625572
chr13:20600751-20637111	0	0	0	3	2	0	chr13	20600751	20637111	+	11	151,116,117,151,173,166,35,130,116,172,126	0,591,4707,7642,10125,24821,25665,31963,32835,34441,36234	circRNA	ZMYM2	NM_001353159	8,9,10,11,12,13,14,15,16,17,18	chr13:20593758-20600751|chr13:20637111-20638590
chr13:20600751-20641530	0	3	0	1	0	0	chr13	20600751	20641530	+	14	151,116,117,151,173,166,35,130,116,172,126,95,169,152	0,591,4707,7642,10125,24821,25665,31963,32835,34441,36234,37839,40239,40627	circRNA	ZMYM2	NM_001353159	8,9,10,11,12,13,14,15,16,17,18,19,20,21	chr13:20593758-20600751|chr13:20641530-20656155
chr13:20625572-20641530	3	5	7	11	9	7	chr13	20625572	20641530	+	9	166,35,130,116,172,126,95,169,152	0,844,7142,8014,9620,11413,13018,15418,15806	circRNA	ZMYM2	NM_001353159	13,14,15,16,17,18,19,20,21	chr13:20611049-20625572|chr13:20641530-20656155
chr13:20632714-20633702	0	0	0	0	2	0	chr13	20632714	20633702	+	2	130.116	0.872	circRNA	ZMYM2	NM_001353159	15.16	chr13:20626451-20632714|chr13:20633702-20635192
chr13:20635192-20641530	0	0	1	0	4	0	chr13	20635192	20641530	+	5	172,126,95,169,152	0,1793,3398,5798,6186	circRNA	ZMYM2	NM_001353159	17,18,19,20,21	chr13:20633702-20635192|chr13:20641530-20656155
chr13:20638590-20641530	3	2	6	2	4	2	chr13	20638590	20641530	+	3	95,169,152	0,2400,2788	circRNA	ZMYM2	NM_001353159	19,20,21	chr13:20637111-20638590|chr13:20641530-20656155
chr13:20638590-20657172	0	4	3	11	5	6	chr13	20638590	20657172	+	5	95,169,152,115,252	0,2400,2788,17565,18330	circRNA	ZMYM2	NM_001353159	19,20,21,22,23	chr13:20637111-20638590|chr13:20657172-20657795
chr13:20638590-20657916	1	5	4	9	3	4	chr13	20638590	20657916	+	6	95,169,152,115,252,121	0,2400,2788,17565,18330,19205	circRNA	ZMYM2	NM_001353159	19,20,21,22,23,24	chr13:20637111-20638590|chr13:20657916-20659961
chr13:21305979-21306260	0	5	8	5	6	2	chr13	21305979	21306260	-	1	281	0	circRNA	N6AMT2	ENST00000382758	4	chr13:21303355-21305979|chr13:21306260-21311861
chr13:21305979-21311944	0	0	1	4	0	0	chr13	21305979	21311944	-	2	281.83	0.5882	circRNA	N6AMT2	ENST00000382758	4.3	chr13:21303355-21305979|chr13:21311944-21331593
chr13:21381595-21384106	0	0	2	0	0	0	chr13	21381595	21384106	-	4	178,146,143,177	0,979,1626,2334	circRNA	XPO4	NM_022459	13,12,11,10	chr13:21375129-21381595|chr13:21384106-21395842
chr13:21557362-21557945	0	1	3	1	2	1	chr13	21557362	21557945	-	1	583	0	circRNA	LATS2	ENST00000382592	5	chr13:21555787-21557362|chr13:21557945-21562019
chr13:21619823-21620369	0	1	2	2	1	5	chr13	21619823	21620369	-	1	546	0	circRNA	LATS2	ENST00000382592	2	chr13:21565543-21619823|chr13:21620369-21635484
chr13:21732060-21746820	0	0	2	1	5	2	chr13	21732060	21746820	-	6	204,86,86,412,166,62	0,1980,3868,10066,14417,14698	circRNA	SKA3	ENST00000400018	7,6,5,4,3,2	chr13:21729289-21732060|chr13:21746820-21750513
chr13:21735928-21746820	1	6	3	6	6	5	chr13	21735928	21746820	-	4	86,412,166,62	0,6198,10549,10830	circRNA	SKA3	ENST00000400018	5,4,3,2	chr13:21734126-21735928|chr13:21746820-21750513
chr13:21742126-21742538	2	3	14	9	11	6	chr13	21742126	21742538	-	1	412	0	circRNA	SKA3	ENST00000400018	4	chr13:21736014-21742126|chr13:21742538-21746477
chr13:21955572-21965993	0	1	1	2	3	3	chr13	21955572	21965993	-	4	113,90,127,133	0,1486,6074,10288	circRNA	ZDHHC20	NM_153251	11,10,9,8	chr13:21950794-21955572|chr13:21965993-21974511
chr13:21955572-21975824	1	0	1	3	2	2	chr13	21955572	21975824	-	6	113,90,127,133,121,33	0,1486,6074,10288,18939,20219	circRNA	ZDHHC20	NM_153251	11,10,9,8,7,6	chr13:21950794-21955572|chr13:21975824-21976935
chr13:21955572-21999817	0	1	0	2	2	2	chr13	21955572	21999817	-	10	113,90,127,133,121,33,70,121,104,27	0,1486,6074,10288,18939,20219,21363,32218,39627,44218	circRNA	ZDHHC20	NM_153251	11,10,9,8,7,6,5,4,3,2	chr13:21950794-21955572|chr13:21999817-22033192
chr13:21961646-21965993	0	0	0	0	0	2	chr13	21961646	21965993	-	2	127.133	0.4214	circRNA	ZDHHC20	NM_153251	9.8	chr13:21957148-21961646|chr13:21965993-21974511
chr13:21974511-21995303	0	1	2	0	1	0	chr13	21974511	21995303	-	5	121,33,70,121,104	0,1280,2424,13279,20688	circRNA	ZDHHC20	NM_153251	7,6,5,4,3	chr13:21965993-21974511|chr13:21995303-21999790
chr13:21987790-21999817	0	0	1	2	3	0	chr13	21987790	21999817	-	3	121,104,27	0,7409,12000	circRNA	ZDHHC20	NM_153251	4,3,2	chr13:21977005-21987790|chr13:21999817-22033192
chr13:22084142-22113827	0	0	0	1	2	1	chr13	22084142	22113827	-	6	98,66,83,48,76,32	0,4349,11241,12599,29298,29653	circRNA	MICU2	NM_152726	8,7,6,5,4,3	chr13:22077236-22084142|chr13:22113827-22140935
chr13:22088491-22113827	0	0	2	0	1	0	chr13	22088491	22113827	-	5	66,83,48,76,32	0,6892,8250,24949,25304	circRNA	MICU2	NM_152726	7,6,5,4,3	chr13:22084240-22088491|chr13:22113827-22140935
chr13:24796956-24798720	1	2	2	3	2	2	chr13	24796956	24798720	+	1	1764	0	circRNA	SPATA13	NM_001286792	4	chr13:24591840-24796956|chr13:24798720-24823614
chr13:25049609-25052414	0	0	0	2	3	1	chr13	25049609	25052414	-	3	125,157,184	0,2229,2621	circRNA	PARP4	ENST00000381989	15,14,13	chr13:25044163-25049609|chr13:25052414-25058790
chr13:25051838-25052414	2	1	1	1	1	2	chr13	25051838	25052414	-	2	157.184	0.392	circRNA	PARP4	ENST00000381989	14.13	chr13:25049734-25051838|chr13:25052414-25058790
chr13:25051838-25067871	0	1	0	2	1	1	chr13	25051838	25067871	-	7	157,184,96,138,161,174,138	0,392,6952,8467,12967,14720,15895	circRNA	PARP4	ENST00000381989	14,13,12,11,10,9,8	chr13:25049734-25051838|chr13:25067871-25068710
chr13:25058790-25072367	0	0	0	0	0	2	chr13	25058790	25072367	-	7	96,138,161,174,138,150,114	0,1515,6015,7768,8943,9920,13463	circRNA	PARP4	ENST00000381989	12,11,10,9,8,7,6	chr13:25052414-25058790|chr13:25072367-25073438
chr13:25466780-25487229	0	2	2	1	0	6	chr13	25466780	25487229	-	9	225,166,133,1615,103,109,297,124,510	0,6776,11283,12703,14448,15375,17147,19303,19939	circRNA	CENPJ	NM_018451	10,9,8,7,6,5,4,3,2	chr13:25463538-25466780|chr13:25487229-25496898
chr13:25478063-25487229	1	1	1	2	3	0	chr13	25478063	25487229	-	7	133,1615,103,109,297,124,510	0,1420,3165,4092,5864,8020,8656	circRNA	CENPJ	NM_018451	8,7,6,5,4,3,2	chr13:25473722-25478063|chr13:25487229-25496898
chr13:25825786-25848325	0	2	0	0	1	0	chr13	25825786	25848325	-	12	127,132,201,50,126,110,133,135,129,158,163,117	0,204,2115,2736,5547,6087,6911,10019,14170,14480,16130,22422	circRNA	MTMR6	ENST00000540661	13,12,11,10,9,8,7,6,5,4,3,2	chr13:25802719-25825786|chr13:25848325-25861361
chr13:25881943-25899206	0	0	4	1	1	3	chr13	25881943	25899206	+	9	143,36,150,138,111,25,66,175,80	0,1441,5077,5808,7551,11520,12724,13113,17183	circRNA	NUPL1	ENST00000381736	2,3,4,5,6,7,8,9,10	chr13:25876018-25881943|chr13:25899206-25901053
chr13:26911703-26928017	2	9	6	12	10	7	chr13	26911703	26928017	+	3	76,111,141	0,11505,16173	circRNA	CDK8	NM_001260	2,3,4	chr13:26828906-26911703|chr13:26928017-26956950
chr13:26911703-26959479	0	0	0	0	2	0	chr13	26911703	26959479	+	5	76,111,141,58,132	0,11505,16173,45247,47644	circRNA	CDK8	NM_001260	2,3,4,5,6	chr13:26828906-26911703|chr13:26959479-26967503
chr13:26974589-26975761	0	1	9	3	2	2	chr13	26974589	26975761	+	3	98,79,159	0,816,1013	circRNA	CDK8	NM_001260	10,11,12	chr13:26971362-26974589|chr13:26975761-26978092
chr13:27649327-27690733	0	0	0	0	4	1	chr13	27649327	27690733	-	6	198,84,77,230,214,81	0,14692,14891,20410,30540,41325	circRNA	USP12	NM_182488	7,6,5,4,3,2	chr13:27645286-27649327|chr13:27690733-27745728
chr13:27664019-27680081	0	0	1	2	1	1	chr13	27664019	27680081	-	4	84,77,230,214	0,199,5718,15848	circRNA	USP12	NM_182488	6,5,4,3	chr13:27649525-27664019|chr13:27680081-27690652
chr13:27664019-27690733	0	0	5	6	8	0	chr13	27664019	27690733	-	5	84,77,230,214,81	0,199,5718,15848,26633	circRNA	USP12	NM_182488	6,5,4,3,2	chr13:27649525-27664019|chr13:27690733-27745728
chr13:27830320-27830702	0	0	2	0	1	0	chr13	27830320	27830702	+	2	151.13	0.252	circRNA	RPL21	NM_000982	5.6	chr13:27829491-27830320|None
chr13:28141776-28155940	0	0	1	3	3	2	chr13	28141776	28155940	-	3	200,248,507	0,1389,13657	circRNA	LNX2	ENST00000316334	4,3,2	chr13:28136918-28141776|chr13:28155940-28194511
chr13:28155433-28155940	0	1	3	0	2	1	chr13	28155433	28155940	-	1	507	0	circRNA	LNX2	ENST00000316334	2	chr13:28143413-28155433|chr13:28155940-28194511
chr13:28748408-28752072	0	7	4	7	5	10	chr13	28748408	28752072	+	3	122,67,71	0,2221,3593	circRNA	PAN3	ENST00000503791	2,3,4	chr13:28713224-28748408|chr13:28752072-28771321
chr13:28748408-28771483	0	2	3	0	0	4	chr13	28748408	28771483	+	4	122,67,71,162	0,2221,3593,22913	circRNA	PAN3	ENST00000503791	2,3,4,5	chr13:28713224-28748408|chr13:28771483-28794367
chr13:28748408-28794515	0	0	5	6	6	7	chr13	28748408	28794515	+	5	122,67,71,162,148	0,2221,3593,22913,45959	circRNA	PAN3	ENST00000503791	2,3,4,5,6	chr13:28713224-28748408|chr13:28794515-28830428
chr13:28748408-28813833	0	1	3	1	2	2	chr13	28748408	28813833	+	6	122,67,71,162,148,118	0,2221,3593,22913,45959,65307	circRNA	PAN3	uc001ury.3	1,2,3,4,5,6	None|chr13:28813833-28830428
chr13:28771321-28794515	0	2	0	2	2	10	chr13	28771321	28794515	+	2	162.148	0.23046	circRNA	PAN3	ENST00000503791	5.6	chr13:28752072-28771321|chr13:28794515-28830428
chr13:28771321-28830676	0	0	0	1	2	0	chr13	28771321	28830676	+	3	162,148,248	0,23046,59107	circRNA	PAN3	ENST00000503791	5,6,7	chr13:28752072-28771321|chr13:28830676-28834583
chr13:28813715-28855516	0	0	1	2	4	0	chr13	28813715	28855516	+	12	118,248,105,58,162,117,102,166,91,140,130,65	0,16713,20868,21822,27136,27516,27721,31122,32402,37658,40833,41736	circRNA	PAN3	uc001ury.3	6,7,8,9,10,11,12,13,14,15,16,17	chr13:28794515-28813715|chr13:28855516-28862120
chr13:28830428-28835595	1	6	5	7	6	7	chr13	28830428	28835595	+	3	248,105,58	0,4155,5109	circRNA	PAN3	ENST00000503791	7,8,9	chr13:28794515-28830428|chr13:28835595-28840851
chr13:28830428-28854678	0	0	4	1	1	0	chr13	28830428	28854678	+	10	248,105,58,162,117,102,166,91,140,130	0,4155,5109,10423,10803,11008,14409,15689,20945,24120	circRNA	PAN3	ENST00000380958	7,8,9,10,11,12,13,14,15,16	chr13:28794515-28830428|chr13:28854678-28855451
chr13:28830428-28855516	3	6	7	3	12	7	chr13	28830428	28855516	+	11	248,105,58,162,117,102,166,91,140,130,65	0,4155,5109,10423,10803,11008,14409,15689,20945,24120,25023	circRNA	PAN3	ENST00000380958	7,8,9,10,11,12,13,14,15,16,17	chr13:28794515-28830428|chr13:28855516-28862120
chr13:28840851-28845003	0	0	4	5	3	5	chr13	28840851	28845003	+	4	162,117,102,166	0,380,585,3986	circRNA	PAN3	ENST00000503791	10,11,12,13	chr13:28835595-28840851|chr13:28845003-28846117
chr13:28855451-28862259	0	0	0	0	2	0	chr13	28855451	28862259	+	2	65.139	0.6669	circRNA	PAN3	ENST00000380958	17.18	chr13:28854678-28855451|chr13:28862259-28866518
chr13:30104674-30110339	1	0	1	2	3	3	chr13	30104674	30110339	-	3	175,159,384	0,2286,5281	circRNA	SLC7A1	ENST00000380752	5,4,3	chr13:30098390-30104674|chr13:30110339-30127897
chr13:30801548-30815223	0	2	0	2	0	2	chr13	30801548	30815223	-	5	135,127,159,106,128	0,3056,3902,13048,13547	circRNA	KATNAL1	NM_001014380	9,8,7,6,5	chr13:30784579-30801548|chr13:30815223-30829583
chr13:30801548-30857928	0	3	1	5	2	2	chr13	30801548	30857928	-	8	135,127,159,106,128,169,161,176	0,3056,3902,13048,13547,28035,52651,56204	circRNA	KATNAL1	NM_001014380	9,8,7,6,5,4,3,2	chr13:30784579-30801548|chr13:30857928-30881076
chr13:30854199-30857928	4	2	3	11	10	9	chr13	30854199	30857928	-	2	161.176	0.3553	circRNA	KATNAL1	NM_001014380	3.2	chr13:30829752-30854199|chr13:30857928-30881076
chr13:31195900-31227442	0	0	0	2	0	0	chr13	31195900	31227442	+	6	129,640,114,130,126,158	0,9071,15980,20864,25168,31384	circRNA	USPL1	NM_001321532	2,3,4,5,6,7	chr13:31192193-31195900|chr13:31227442-31231610
chr13:31204971-31205611	1	0	0	2	4	0	chr13	31204971	31205611	+	1	640	0	circRNA	USPL1	NM_001321532	3	chr13:31196029-31204971|chr13:31205611-31211880
chr13:31204971-31221194	0	0	0	1	3	1	chr13	31204971	31221194	+	4	640,114,130,126	0,6909,11793,16097	circRNA	USPL1	NM_001321532	3,4,5,6	chr13:31196029-31204971|chr13:31221194-31227284
chr13:31789187-31803431	0	2	4	0	4	0	chr13	31789187	31803431	+	3	50,40,110	0,7901,14134	circRNA	B3GALTL	ENST00000343307	2,3,4	chr13:31774291-31789187|chr13:31803431-31821159
chr13:32652970-32676153	0	0	2	0	0	0	chr13	32652970	32676153	+	2	200.54	0.23129	circRNA	FRY	NM_023037	2.3	chr13:32606002-32652970|chr13:32676153-32691470
chr13:32652970-32691610	1	1	2	1	0	0	chr13	32652970	32691610	+	3	200,54,140	0,23129,38500	circRNA	FRY	NM_023037	2,3,4	chr13:32606002-32652970|chr13:32691610-32698422
chr13:32698422-32699012	1	0	0	2	0	0	chr13	32698422	32699012	+	3	91,80,81	0,316,509	circRNA	FRY	NM_023037	5,6,7	chr13:32691610-32698422|chr13:32699012-32705808
chr13:32920963-32932066	0	0	3	1	0	1	chr13	32920963	32932066	+	4	70,428,182,188	0,8034,9601,10915	circRNA	BRCA2	ENST00000380152	13,14,15,16	chr13:32918790-32920963|chr13:32932066-32936659
chr13:33052023-33054774	0	0	0	0	0	3	chr13	33052023	33054774	-	2	162.48	0.2703	circRNA	N4BP2L2	ENST00000503296	3.2	chr13:33018263-33052023|chr13:33054774-33064228
chr13:33091993-33096407	0	0	1	0	3	0	chr13	33091993	33096407	-	3	147,77,89	0,3516,4325	circRNA	N4BP2L2	NM_001320836	6,5,4	chr13:33018263-33091993|chr13:33096407-33101544
chr13:33091993-33101669	7	56	70	99	135	98	chr13	33091993	33101669	-	4	147,77,89,125	0,3516,4325,9551	circRNA	N4BP2L2	NM_001320836	6,5,4,3	chr13:33018263-33091993|chr13:33101669-33109905
chr13:33095509-33101669	0	3	1	0	3	0	chr13	33095509	33101669	-	3	77,89,125	0,809,6035	circRNA	N4BP2L2	NM_001320836	5,4,3	chr13:33092140-33095509|chr13:33101669-33109905
chr13:33109905-33111164	2	11	11	13	17	12	chr13	33109905	33111164	-	1	1259	0	circRNA	N4BP2L2	NM_001320836	2	chr13:33101669-33109905|chr13:33111164-33112754
chr13:33222890-33233417	0	0	1	1	3	1	chr13	33222890	33233417	+	5	127,204,87,98,127	0,3050,9485,9680,10400	circRNA	PDS5B	uc001uuo.3	2,3,4,5,6	chr13:33160730-33222890|chr13:33233417-33241900
chr13:33222890-33241981	0	0	2	1	0	0	chr13	33222890	33241981	+	6	127,204,87,98,127,81	0,3050,9485,9680,10400,19010	circRNA	PDS5B	uc001uuo.3	2,3,4,5,6,7	chr13:33160730-33222890|chr13:33241981-33247352
chr13:33222890-33253066	0	4	5	7	4	3	chr13	33222890	33253066	+	9	127,204,87,98,127,81,141,116,95	0,3050,9485,9680,10400,19010,24462,27090,30081	circRNA	PDS5B	uc001uuo.3	2,3,4,5,6,7,8,9,10	chr13:33160730-33222890|chr13:33253066-33258014
chr13:33268359-33284243	0	0	0	1	1	2	chr13	33268359	33284243	+	6	82,49,140,116,106,161	0,2631,5507,7100,12711,15723	circRNA	PDS5B	ENST00000315596	14,15,16,17,18,19	chr13:33262706-33268359|chr13:33284243-33306237
chr13:33306237-33309467	3	2	5	4	5	3	chr13	33306237	33309467	+	2	124.159	0.3071	circRNA	PDS5B	ENST00000315596	20.21	chr13:33284243-33306237|chr13:33309467-33315217
chr13:33306237-33320238	1	0	1	1	2	3	chr13	33306237	33320238	+	5	124,159,69,137,124	0,3071,8980,10491,13877	circRNA	PDS5B	ENST00000315596	20,21,22,23,24	chr13:33284243-33306237|chr13:33320238-33327469
chr13:33315217-33334858	0	2	0	0	0	0	chr13	33315217	33334858	+	9	69,137,124,205,115,133,120,63,146	0,1511,4897,12252,14762,17007,17454,18548,19495	circRNA	PDS5B	ENST00000315596	22,23,24,25,26,27,28,29,30	chr13:33309467-33315217|chr13:33334858-33338626
chr13:35615069-35619538	0	2	0	0	1	0	chr13	35615069	35619538	+	3	232,101,96	0,4014,4373	circRNA	NBEA	ENST00000400445	2,3,4	chr13:35517251-35615069|chr13:35619538-35622699
chr13:35615069-35622821	0	2	0	0	1	0	chr13	35615069	35622821	+	4	232,101,96,122	0,4014,4373,7630	circRNA	NBEA	ENST00000400445	2,3,4,5	chr13:35517251-35615069|chr13:35622821-35624405
chr13:35622699-35672542	0	0	0	0	2	0	chr13	35622699	35672542	+	7	122,127,120,147,198,134,109	0,1706,7447,10154,21345,22156,49734	circRNA	NBEA	ENST00000400445	5,6,7,8,9,10,11	chr13:35619538-35622699|chr13:35672542-35683426
chr13:36900711-36909969	0	0	2	0	0	0	chr13	36900711	36909969	-	4	124,156,198,812	0,2787,4824,8446	circRNA	SPG20	ENST00000438666	5,4,3,2	chr13:36888558-36900711|chr13:36909969-36920361
chr13:37614541-37625720	2	1	5	7	4	5	chr13	37614541	37625720	-	7	54,117,104,127,67,59,96	0,171,3673,4842,7130,7473,11083	circRNA	SUPT20H	ENST00000490716	8,7,6,5,4,3,2	chr13:37607725-37614541|chr13:37625720-37633498
chr13:40268770-40301685	0	3	0	2	1	1	chr13	40268770	40301685	+	7	92,118,132,168,108,54,80	0,4867,24602,25026,28699,29874,32835	circRNA	COG6	NM_020751	12,13,14,15,16,17,18	chr13:40263961-40268770|chr13:40301685-40325082
chr13:40293372-40301685	0	1	2	4	8	1	chr13	40293372	40301685	+	5	132,168,108,54,80	0,424,4097,5272,8233	circRNA	COG6	NM_020751	14,15,16,17,18	chr13:40273755-40293372|chr13:40301685-40325082
chr13:41044132-41048232	0	0	2	0	0	0	chr13	41044132	41048232	-	2	167.102	0.3998	circRNA	LINC00598	NR_024506	3.2	chr13:41040814-41044132|chr13:41048232-41055045
chr13:41323273-41333242	0	0	3	2	0	0	chr13	41323273	41333242	-	4	144,74,141,159	0,4881,7735,9810	circRNA	MRPS31	NM_005830	6,5,4,3	chr13:41303737-41323273|chr13:41333242-41340881
chr13:41400641-41411021	0	0	1	2	0	0	chr13	41400641	41411021	-	3	89,92,77	0,10091,10303	circRNA	TPTE2P5	NR_038258	7,6,5	chr13:41374860-41400641|chr13:41411021-41428796
chr13:41400641-41429951	0	0	3	0	0	0	chr13	41400641	41429951	-	6	89,92,77,89,82,61	0,10091,10303,28155,28347,29249	circRNA	TPTE2P5	NR_038258	7,6,5,4,3,2	chr13:41374860-41400641|chr13:41429951-41495754
chr13:41410732-41429951	0	1	1	0	3	0	chr13	41410732	41429951	-	5	92,77,89,82,61	0,212,18064,18256,19158	circRNA	TPTE2P5	NR_038258	6,5,4,3,2	chr13:41400730-41410732|chr13:41429951-41495754
chr13:41482294-41488241	2	0	2	1	1	1	chr13	41482294	41488241	-	4	54,72,63,91	0,3575,4638,5856	circRNA	SUGT1P3	ENST00000604259	6,5,4,3	None|chr13:41488241-41495609
chr13:41515056-41515506	0	2	1	2	0	1	chr13	41515056	41515506	-	1	450	0	circRNA	ELF1	NM_001145353	7	chr13:41508164-41515056|chr13:41515506-41517087
chr13:41515056-41518061	2	1	6	4	3	2	chr13	41515056	41518061	-	3	450,193,84	0,2031,2921	circRNA	ELF1	NM_001145353	7,6,5	chr13:41508164-41515056|chr13:41518061-41523941
chr13:41517087-41518061	2	6	2	2	5	1	chr13	41517087	41518061	-	2	193.84	0.89	circRNA	ELF1	NM_001145353	6.5	chr13:41515506-41517087|chr13:41518061-41523941
chr13:41523941-41525572	0	3	6	4	3	2	chr13	41523941	41525572	-	2	96.108	0.1523	circRNA	ELF1	NM_001145353	4.3	chr13:41518061-41523941|chr13:41525572-41532971
chr13:41523941-41533152	0	4	5	6	8	5	chr13	41523941	41533152	-	3	96,108,181	0,1523,9030	circRNA	ELF1	NM_001145353	4,3,2	chr13:41518061-41523941|chr13:41533152-41556118
chr13:41556118-41556418	0	0	2	1	1	1	chr13	41556118	41556418	-	1	300	0	circRNA	ELF1	NM_172373	2	chr13:41533152-41556118|chr13:41556418-41593363
chr13:41639151-41654945	0	0	0	0	0	2	chr13	41639151	41654945	+	7	63,124,177,47,76,194,164	0,148,3545,6511,7766,11028,15630	circRNA	WBP4	NM_007187	3,4,5,6,7,8,9	chr13:41636852-41639151|chr13:41654945-41656839
chr13:41826780-41828756	0	0	3	2	2	0	chr13	41826780	41828756	-	3	108,82,92	0,304,1884	circRNA	MTRF1	ENST00000379480	5,4,3	chr13:41814569-41826780|chr13:41828756-41834628
chr13:41826780-41835051	1	5	3	7	7	11	chr13	41826780	41835051	-	4	108,82,92,423	0,304,1884,7848	circRNA	MTRF1	ENST00000379480	5,4,3,2	chr13:41814569-41826780|chr13:41835051-41837620
chr13:41826780-41837620	0	2	0	2	1	2	chr13	41826780	41837620	-	5	108,82,92,423,210	0,304,1884,7848,10630	circRNA	MTRF1	uc010tff.2	6,5,4,3,2	chr13:41814569-41826780|chr13:41837620-41837702
chr13:41890981-41905505	0	2	0	0	1	1	chr13	41890981	41905505	+	7	85,105,158,135,154,120,96	0,1960,3821,6210,8852,11878,14428	circRNA	NAA16	NM_001110798	2,3,4,5,6,7,8	chr13:41885718-41890981|chr13:41905505-41910785
chr13:41890981-41910892	0	1	0	2	0	2	chr13	41890981	41910892	+	8	85,105,158,135,154,120,96,107	0,1960,3821,6210,8852,11878,14428,19804	circRNA	NAA16	NM_001110798	2,3,4,5,6,7,8,9	chr13:41885718-41890981|chr13:41910892-41929279
chr13:41892941-41894960	0	1	0	0	0	3	chr13	41892941	41894960	+	2	105.158	0.1861	circRNA	NAA16	NM_001110798	3.4	chr13:41891066-41892941|chr13:41894960-41897191
chr13:41892941-41905505	0	0	1	0	4	1	chr13	41892941	41905505	+	6	105,158,135,154,120,96	0,1861,4250,6892,9918,12468	circRNA	NAA16	NM_001110798	3,4,5,6,7,8	chr13:41891066-41892941|chr13:41905505-41910785
chr13:41892941-41910892	1	2	5	3	3	3	chr13	41892941	41910892	+	7	105,158,135,154,120,96,107	0,1861,4250,6892,9918,12468,17844	circRNA	NAA16	NM_001110798	3,4,5,6,7,8,9	chr13:41891066-41892941|chr13:41910892-41929279
chr13:41892941-41943419	0	0	2	0	0	0	chr13	41892941	41943419	+	13	105,158,135,154,120,96,107,73,170,153,129,214,194	0,1861,4250,6892,9918,12468,17844,36338,39498,40004,43225,48633,50284	circRNA	NAA16	ENST00000379406	3,4,5,6,7,8,9,10,11,12,13,14,15	chr13:41891066-41892941|chr13:41943419-41946338
chr13:41894960-41897178	0	0	0	2	2	1	chr13	41894960	41897178	+	1	2218	0	ciRNA	NAA16	NM_001110798	4	chr13:41894960-41897191
chr13:41943225-41946966	0	1	2	4	0	1	chr13	41943225	41946966	+	3	194,109,99	0,3113,3642	circRNA	NAA16	ENST00000379406	15,16,17	chr13:41941788-41943225|chr13:41946966-41947772
chr13:42352120-42393522	0	0	0	0	1	2	chr13	42352120	42393522	-	6	72,107,107,116,78,169	0,5810,9452,33240,38713,41233	circRNA	VWA8	NM_015058	20,19,18,17,16,15	chr13:42335340-42352120|chr13:42393522-42404664
chr13:42385360-42393522	0	2	3	12	2	1	chr13	42385360	42393522	-	3	116,78,169	0,5473,7993	circRNA	VWA8	NM_015058	17,16,15	chr13:42361679-42385360|chr13:42393522-42404664
chr13:42385360-42407667	0	1	3	2	3	3	chr13	42385360	42407667	-	5	116,78,169,114,161	0,5473,7993,19304,22146	circRNA	VWA8	NM_015058	17,16,15,14,13	chr13:42361679-42385360|chr13:42407667-42439871
chr13:42439871-42442613	4	10	21	46	31	24	chr13	42439871	42442613	-	3	78,135,132	0,166,2610	circRNA	VWA8	NM_015058	12,11,10	chr13:42407667-42439871|chr13:42442613-42457522
chr13:42439871-42461497	1	3	3	1	1	1	chr13	42439871	42461497	-	7	78,135,132,105,109,50,165	0,166,2610,17651,20184,21045,21461	circRNA	VWA8	NM_015058	12,11,10,9,8,7,6	chr13:42407667-42439871|chr13:42461497-42465555
chr13:42729426-42729935	0	0	2	2	0	1	chr13	42729426	42729935	+	2	105.133	0.376	circRNA	DGKH	uc010tfh.2	5.6	chr13:42703768-42729426|chr13:42729935-42733401
chr13:42733401-42734272	0	1	0	1	2	0	chr13	42733401	42734272	+	2	107.126	0.745	circRNA	DGKH	uc010tfh.2	7.8	chr13:42729935-42733401|chr13:42734272-42739466
chr13:42742575-42761284	0	0	0	1	1	4	chr13	42742575	42761284	+	5	109,140,85,86,100	0,239,5620,9695,18609	circRNA	DGKH	uc010tfh.2	11,12,13,14,15	chr13:42740810-42742575|chr13:42761284-42763171
chr13:42752270-42764661	0	0	2	0	0	0	chr13	42752270	42764661	+	4	86,100,274,123	0,8914,10901,12268	circRNA	DGKH	uc010tfh.2	14,15,16,17	chr13:42748280-42752270|chr13:42764661-42769020
chr13:42860121-42882745	1	0	2	0	6	2	chr13	42860121	42882745	+	8	50,100,117,48,135,265,4501,156	0,314,6399,9709,11062,12547,13377,22468	circRNA	AKAP11	ENST00000025301	2,3,4,5,6,7,8,9	chr13:42846364-42860121|chr13:42882745-42887182
chr13:43500471-43544806	0	1	0	3	1	0	chr13	43500471	43544806	-	6	94,74,84,74,84,59	0,27612,36919,37730,42758,44276	circRNA	EPSTI1	ENST00000313640	7,6,5,4,3,2	chr13:43493468-43500471|chr13:43544806-43566113
chr13:43528083-43544806	3	0	1	6	3	1	chr13	43528083	43544806	-	5	74,84,74,84,59	0,9307,10118,15146,16664	circRNA	EPSTI1	ENST00000313640	6,5,4,3,2	chr13:43500565-43528083|chr13:43544806-43566113
chr13:43537390-43544806	0	0	0	2	0	0	chr13	43537390	43544806	-	4	84,74,84,59	0,811,5839,7357	circRNA	EPSTI1	ENST00000313640	5,4,3,2	chr13:43528157-43537390|chr13:43544806-43566113
chr13:45553324-45556289	0	0	2	0	0	1	chr13	45553324	45556289	-	4	77,63,99,83	0,700,1532,2882	circRNA	NUFIP1	NM_012345	5,4,3,2	chr13:45540071-45553324|chr13:45556289-45563159
chr13:45578439-45602138	0	1	0	2	1	2	chr13	45578439	45602138	+	7	133,102,85,132,165,99,219	0,1897,4490,10647,11127,16025,23480	circRNA	GPALPP1	NM_001316951	2,3,4,5,6,7,8	chr13:45563877-45578439|chr13:45602138-45603373
chr13:45725821-45781640	3	5	8	6	7	5	chr13	45725821	45781640	+	2	145.82	0.55737	circRNA	GTF2F2	NM_004128	4.5	chr13:45723923-45725821|chr13:45781640-45827005
chr13:45983061-45985615	0	1	0	0	2	0	chr13	45983061	45985615	-	2	148.119	0.2435	circRNA	SLC25A30	ENST00000519676	3.2	chr13:45980112-45983061|chr13:45985615-45992434
chr13:46077378-46085989	0	0	0	2	1	2	chr13	46077378	46085989	+	3	106,125,90	0,6448,8521	circRNA	COG3	NM_031431	14,15,16	chr13:46070447-46077378|chr13:46085989-46090277
chr13:46090277-46093229	0	1	2	7	3	3	chr13	46090277	46093229	+	3	121,89,135	0,2619,2817	circRNA	COG3	NM_031431	17,18,19	chr13:46085989-46090277|chr13:46093229-46099110
chr13:46090277-46099186	0	1	2	4	6	2	chr13	46090277	46099186	+	4	121,89,135,76	0,2619,2817,8833	circRNA	COG3	NM_031431	17,18,19,20	chr13:46085989-46090277|chr13:46099186-46103925
chr13:46090277-46104915	2	2	2	3	3	4	chr13	46090277	46104915	+	6	121,89,135,76,128,99	0,2619,2817,8833,13648,14539	circRNA	COG3	NM_031431	17,18,19,20,21,22	chr13:46085989-46090277|chr13:46104915-46108836
chr13:46553947-46594692	0	2	0	0	2	0	chr13	46553947	46594692	-	7	192,465,311,198,158,140,109	0,5484,8974,23326,30535,31602,40636	circRNA	ZC3H13	ENST00000242848	11,10,9,8,7,6,5	chr13:46549973-46553947|chr13:46594692-46616298
chr13:46559431-46594692	0	3	1	1	1	2	chr13	46559431	46594692	-	6	465,311,198,158,140,109	0,3490,17842,25051,26118,35152	circRNA	ZC3H13	ENST00000242848	10,9,8,7,6,5	chr13:46554139-46559431|chr13:46594692-46616298
chr13:46577273-46585689	0	0	0	0	0	2	chr13	46577273	46585689	-	3	198,158,140	0,7209,8276	circRNA	ZC3H13	ENST00000242848	8,7,6	chr13:46563232-46577273|chr13:46585689-46594583
[truncated: 10,810 more rows]

## Sheet: HC circRNA
ID	CD42neg_1 (RPM)	CD42neg_2 (RPM)	CD42neg_3 (RPM)	CD42pos_1 (RPM)	CD42pos_2 (RPM)	CD42pos_3 (RPM)	chrom	start	end	strand	exonCount	exonSizes	exonOffsets	circType	geneName	isoformName	index	flankIntron
chr10:102683731-102685776	0.0811982	0.158923	0.201056	0.400657	0.256072	0.254404	chr10	102683731	102685776	+	2	998.71	0.1974	circRNA	FAM178A	uc001krs.3	5.6	chr10:102678198-102683731|chr10:102685776-102689073
chr10:102683731-102690835	0.013533	0.0467422	0.0861668	0.114473	0.0404324	0.0424007	chr10	102683731	102690835	+	5	998,71,123,168,103	0,1974,5342,5855,7001	circRNA	FAM178A	uc001krs.3	5,6,7,8,9	chr10:102678198-102683731|chr10:102690835-102697158
chr10:103427642-103436193	0.216529	0.17762	0.430834	1.04934	0.68735	0.522942	chr10	103427642	103436193	-	4	95,133,186,96	0,5029,5602,8455	circRNA	FBXW4	NM_022039	5,4,3,2	chr10:103384567-103427642|chr10:103436193-103454137
chr10:103432671-103436193	0.0405991	0.102833	0.143611	0.17171	0.161729	0.098935	chr10	103432671	103436193	-	3	133,186,96	0,573,3426	circRNA	FBXW4	NM_022039	4,3,2	chr10:103427737-103432671|chr10:103436193-103454137
chr10:103552595-103570071	0.0270661	0.0373937	0.157972	0.305262	0.283027	0.183736	chr10	103552595	103570071	-	8	105,86,175,614,285,99,172,131	0,1074,5141,6003,10896,13206,14891,17345	circRNA	MGEA5	ENST00000439817	11,10,9,8,7,6,5,4	chr10:103551196-103552595|chr10:103570071-103572786
chr10:103916775-103917971	0	0.0841359	0.114889	0.114473	0.0404324	0.127202	chr10	103916775	103917971	+	4	56,140,125,166	0,170,412,1030	circRNA	NOLC1	ENST00000605788	2,3,4,5	chr10:103912287-103916775|chr10:103917971-103918949
chr10:105199502-105200607	0.108264	0.0747875	0.100528	0.0572367	0.10782	0.127202	chr10	105199502	105200607	+	3	123,292,117	0,544,988	circRNA	PDCD11	ENST00000369797	28,29,30	chr10:105198565-105199502|chr10:105200607-105201582
chr10:112356155-112358048	0.13533	0.158923	0.344667	0.763155	0.336936	0.438141	chr10	112356155	112358048	+	2	153.152	0.1741	circRNA	SMC3	NM_005445	19.2	chr10:112352981-112356155|chr10:112358048-112359411
chr10:112723882-112745523	0.0541321	0.186969	0.330306	0.629603	0.350414	0.212004	chr10	112723882	112745523	+	2	937.138	0.21503	circRNA	SHOC2	NM_001324336	2.3	chr10:112679199-112723882|chr10:112745523-112760172
chr10:11291115-11330515	0	0.0280453	0.0430834	0.0953944	0.0808647	0.113069	chr10	11291115	11330515	+	6	49,135,80,159,64,135	0,8585,17445,21513,25904,39265	circRNA	CELF2	NM_001326317	6,7,8,9,10,11	chr10:11259470-11291115|chr10:11330515-11356101
chr10:1130342-1142186	0.0270661	0.0467422	0.100528	0.152631	0.148252	0.127202	chr10	1130342	1142186	+	4	136,72,45,77	0,1883,9049,11767	circRNA	WDR37	ENST00000358220	6,7,8,9	chr10:1126416-1130342|chr10:1142186-1149541
chr10:115636279-115644139	0.013533	0.065439	0.0718056	0.228947	0.161729	0.155469	chr10	115636279	115644139	+	3	456,122,130	0,3053,7730	circRNA	NHLRC2	NM_198514	3,4,5	chr10:115618439-115636279|chr10:115644139-115657868
chr10:116603499-116608496	0	0.0186969	0.0430834	0.114473	0.0404324	0.0424007	chr10	116603499	116608496	+	7	197,115,77,193,170,144,91	0,1626,2272,2434,2818,3349,4906	circRNA	FAM160B1	ENST00000369248	7,8,9,10,11,12,13	chr10:116602985-116603499|chr10:116608496-116614955
chr10:11893995-11894214	0.0405991	0.0280453	0.0718056	0.190789	0.309981	0.127202	chr10	11893995	11894214	+	1	219	0	circRNA	PROSER2	ENST00000474155	2	chr10:11865469-11893995|chr10:11894214-11904910
chr10:12039670-12056183	0.108264	0.186969	0.244139	0.572367	0.471711	0.367473	chr10	12039670	12056183	-	5	86,104,150,198,161	0,2234,4004,6858,16352	circRNA	UPF2	ENST00000356352	7,6,5,4,3	chr10:12021164-12039670|chr10:12056183-12070743
chr10:12123470-12133683	0.013533	0.0747875	0.0430834	0.0763155	0.0673873	0.0848015	chr10	12123470	12133683	+	5	156,212,195,270,172	0,3068,6063,7514,10041	circRNA	DHTKD1	NM_018706	2,3,4,5,6	chr10:12111186-12123470|chr10:12133683-12136071
chr10:12123470-12136270	0.013533	0.0560906	0.114889	0.0572367	0.188684	0.127202	chr10	12123470	12136270	+	6	156,212,195,270,172,199	0,3068,6063,7514,10041,12601	circRNA	DHTKD1	NM_018706	2,3,4,5,6,7	chr10:12111186-12123470|chr10:12136270-12139682
chr10:12123470-12143180	0.0270661	0.0560906	0.0143611	0.0572367	0.0808647	0.098935	chr10	12123470	12143180	+	9	156,212,195,270,172,199,313,85,140	0,3068,6063,7514,10041,12601,16212,18706,19570	circRNA	DHTKD1	NM_018706	2,3,4,5,6,7,8,9,10	chr10:12111186-12123470|chr10:12143180-12148244
chr10:12123470-12162266	0.0270661	0.065439	0.157972	0.228947	0.175207	0.098935	chr10	12123470	12162266	+	15	156,212,195,270,172,199,313,85,140,151,107,165,83,170,86	0,3068,6063,7514,10041,12601,16212,18706,19570,24774,26437,31428,36201,37277,38710	circRNA	DHTKD1	NM_018706	2,3,4,5,6,7,8,9,10,11,12,13,14,15,16	chr10:12111186-12123470|chr10:12162266-12162785
chr10:121275020-121286936	0.0676652	0.0841359	0.330306	0.457893	0.363891	0.381607	chr10	121275020	121286936	-	3	144,87,119	0,10523,11797	circRNA	RGS10	NM_002925	4,3,2	chr10:121259771-121275020|chr10:121286936-121295975
chr10:12160747-12162266	0.0270661	0.0560906	0	0.0763155	0.121297	0.0565343	chr10	12160747	12162266	+	2	170.86	0.1433	circRNA	DHTKD1	NM_018706	15.16	chr10:12159754-12160747|chr10:12162266-12162785
chr10:126370175-126370948	0.0947312	0.243059	0.38775	0.629603	0.444756	0.409874	chr10	126370175	126370948	-	1	773	0	circRNA	FAM53B	uc001lhu.1	8	chr10:126307362-126370175|chr10:126370948-126384726
chr10:126370175-126384781	0.0270661	0	0.0287223	0.190789	0.0673873	0.0565343	chr10	126370175	126384781	-	2	773.55	0.14551	circRNA	FAM53B	uc001lhu.1	8.7	chr10:126307362-126370175|chr10:126384781-126395204
chr10:126395204-126395456	0	0.0560906	0.0430834	0.133552	0.0404324	0.127202	chr10	126395204	126395456	-	1	252	0	circRNA	FAM53B	uc001lhu.1	6	chr10:126384781-126395204|chr10:126395456-126448954
chr10:126631025-126631876	0.013533	0.261756	0.50264	0.305262	0.539098	0.325072	chr10	126631025	126631876	+	1	851	0	circRNA	ZRANB1	uc010qug.2	2	chr10:126629116-126631025|chr10:126631876-126655162
chr10:126727565-126799662	0	0.0280453	0.0430834	0.0572367	0.0404324	0.0282672	chr10	126727565	126799662	-	2	159.104	0.71993	circRNA	CTBP2	uc009yak.3	3.2	chr10:126692061-126727565|chr10:126799662-126847203
chr10:128768965-128788867	0	0.0747875	0.0861668	0.152631	0.202162	0.127202	chr10	128768965	128788867	+	5	84,41,56,97,149	0,7246,11216,16819,19753	circRNA	DOCK1	ENST00000280333	2,3,4,5,6	chr10:128594132-128768965|chr10:128788867-128795011
chr10:128768965-128798571	0.108264	0.102833	0.215417	0.534209	0.296504	0.296805	chr10	128768965	128798571	+	9	84,41,56,97,149,136,158,82,136	0,7246,11216,16819,19753,26046,27390,28652,29470	circRNA	DOCK1	ENST00000280333	2,3,4,5,6,7,8,9,10	chr10:128594132-128768965|chr10:128798571-128806995
chr10:13214375-13214765	0.0405991	0.0373937	0.143611	0.17171	0.148252	0.0706679	chr10	13214375	13214765	+	2	105.138	0.252	circRNA	MCM10	ENST00000378714	4.5	chr10:13213263-13214375|chr10:13214765-13217509
chr10:134421418-134523960	0.0270661	0.0280453	0	0.190789	0.10782	0.0706679	chr10	134421418	134523960	+	7	42,101,88,64,104,53,120	0,37953,42503,82477,89901,100398,102422	circRNA	INPP5A	NM_005539	2,3,4,5,6,7,8	chr10:134351675-134421418|chr10:134523960-134540324
chr10:134503895-134523960	0	0.00934844	0.0143611	0.228947	0.0808647	0.0424007	chr10	134503895	134523960	+	4	64,104,53,120	0,7424,17921,19945	circRNA	INPP5A	NM_005539	5,6,7,8	chr10:134464009-134503895|chr10:134523960-134540324
chr10:135209216-135216277	0	0.00934844	0.0430834	0.17171	0.10782	0.0565343	chr10	135209216	135216277	+	8	65,105,81,57,91,62,97,82	0,450,2722,3457,3816,5816,6436,6979	circRNA	RP11-108K14.8	ENST00000468317	3,4,5,6,7,8,9,10	chr10:135204932-135209216|chr10:135216277-135232983
chr10:14938844-14939516	0.013533	0.0373937	0.0574445	0.17171	0.0269549	0.0565343	chr10	14938844	14939516	+	1	672	0	circRNA	SUV39H2	NM_001193424	3	chr10:14923644-14938844|chr10:14939516-14941537
chr10:15858833-15889942	0.013533	0.0747875	0.114889	0.648682	0.296504	0.183736	chr10	15858833	15889942	-	8	81,71,80,74,115,174,61,80	0,4821,16795,17708,20369,24591,26377,31029	circRNA	MINDY3	NM_001318330	9,8,7,6,5,4,3,2	chr10:15838171-15858833|chr10:15889942-15902204
chr10:15863654-15885271	0	0.0186969	0.0861668	0.0572367	0.121297	0.0424007	chr10	15863654	15885271	-	6	71,80,74,115,174,61	0,11974,12887,15548,19770,21556	circRNA	MINDY3	NM_001318330	8,7,6,5,4,3	chr10:15858914-15863654|chr10:15885271-15889862
chr10:15863654-15889942	0	0.0186969	0.0718056	0.133552	0.10782	0.127202	chr10	15863654	15889942	-	7	71,80,74,115,174,61,80	0,11974,12887,15548,19770,21556,26208	circRNA	MINDY3	NM_001318330	8,7,6,5,4,3,2	chr10:15858914-15863654|chr10:15889942-15902204
chr10:15875628-15885271	0	0.0186969	0.0430834	0.0763155	0.0539098	0.0706679	chr10	15875628	15885271	-	5	80,74,115,174,61	0,913,3574,7796,9582	circRNA	MINDY3	NM_001318330	7,6,5,4,3	chr10:15863725-15875628|chr10:15885271-15889862
chr10:15875628-15889942	0.0676652	0.17762	0.215417	0.381578	0.336936	0.19787	chr10	15875628	15889942	-	6	80,74,115,174,61,80	0,913,3574,7796,9582,14234	circRNA	MINDY3	NM_001318330	7,6,5,4,3,2	chr10:15863725-15875628|chr10:15889942-15902204
chr10:16526335-16528616	0	0.0467422	0.0574445	0.152631	0.0539098	0.0282672	chr10	16526335	16528616	+	2	480.266	0.2015	circRNA	PTER	ENST00000535784	2.3	chr10:16479046-16526335|chr10:16528616-16547018
chr10:16794537-16806509	0	0.0186969	0.0574445	0.0572367	0.0404324	0.0282672	chr10	16794537	16806509	-	4	115,83,119,121	0,379,2332,11851	circRNA	RSU1	ENST00000377921	6,5,4,3	chr10:16737154-16794537|chr10:16806509-16824032
chr10:16794537-16824083	0.013533	0.0280453	0.114889	0.17171	0.229117	0.409874	chr10	16794537	16824083	-	5	115,83,119,121,51	0,379,2332,11851,29495	circRNA	RSU1	ENST00000377921	6,5,4,3,2	chr10:16737154-16794537|chr10:16824083-16858971
chr10:17401512-17432619	0.0947312	0.224362	0.315945	0.68684	0.417801	0.254404	chr10	17401512	17432619	-	2	87.9	0.31017	circRNA	ST8SIA6	NM_001004470	4.3	chr10:17373551-17401512|chr10:17432619-17495557
chr10:17645558-17646046	0.013533	0.0373937	0.0574445	0.0763155	0.0539098	0.0565343	chr10	17645558	17646046	-	3	89,19,118	0,166,370	circRNA	HACD1	NM_014241	4,3,2	chr10:17641410-17645558|chr10:17646046-17659081
chr10:17746429-17747740	0.013533	0.065439	0.114889	0.324341	0.175207	0.183736	chr10	17746429	17747740	+	3	88,55,154	0,539,1157	circRNA	STAM	ENST00000377524	10,11,12	chr10:17742278-17746429|chr10:17747740-17750774
chr10:20432223-20453496	0	0.0560906	0.0287223	0.114473	0.256072	0.0424007	chr10	20432223	20453496	+	3	123,119,100	0,4489,21173	circRNA	PLXDC2	ENST00000377242	4,5,6	chr10:20357168-20432223|chr10:20453496-20465927
chr10:22171210-22209892	0	0.0373937	0.0430834	0.0763155	0.0943422	0.0565343	chr10	22171210	22209892	-	5	158,91,94,98,166	0,22240,36497,37550,38516	circRNA	DNAJC1	ENST00000376980	8,7,6,5,4	chr10:22095028-22171210|chr10:22209892-22217434
chr10:225933-267296	0.013533	0.0280453	0.157972	0.152631	0.148252	0.113069	chr10	225933	267296	+	3	135,160,162	0,29895,41201	circRNA	ZMYND11	NM_006624	2,3,4	chr10:180726-225933|chr10:267296-282777
chr10:22880557-22898646	0	0.0186969	0.0287223	0.190789	0.161729	0.0706679	chr10	22880557	22898646	-	3	153,97,98	0,16298,17991	circRNA	PIP4K2A	NM_001330062	4,3,2	chr10:22862386-22880557|chr10:22898646-23002864
chr10:22896855-22898646	0	0.0280453	0.0430834	0.0763155	0.188684	0.0282672	chr10	22896855	22898646	-	2	97.98	0.1693	circRNA	PIP4K2A	NM_001330062	3.2	chr10:22880710-22896855|chr10:22898646-23002864
chr10:24908401-24924032	0.013533	0.0186969	0	0.0381578	0.0808647	0.0565343	chr10	24908401	24924032	-	5	1897,30,55,79,93	0,3260,10523,13929,15538	circRNA	ARHGAP21	ENST00000396432	9,8,7,6,5	chr10:24896832-24908401|chr10:24924032-24955913
chr10:27453992-27454468	0	0.0373937	0.0718056	0.114473	0.121297	0.0565343	chr10	27453992	27454468	+	2	107.151	0.325	circRNA	MASTL	ENST00000375946	5.6	chr10:27450111-27453992|chr10:27454468-27456030
chr10:28408579-28420620	0.0270661	0	0	0.190789	0.161729	0.0282672	chr10	28408579	28420620	-	6	65,197,75,86,82,132	0,543,943,4380,5359,11909	circRNA	MPP7	ENST00000337532	12,11,10,9,8,7	chr10:28378770-28408579|chr10:28420620-28436411
chr10:3160973-3162236	0.0676652	0.130878	0.215417	0.324341	0.242594	0.296805	chr10	3160973	3162236	+	2	88.153	0.111	circRNA	PFKP	ENST00000381125	15.16	chr10:3159038-3160973|chr10:3162236-3172010
chr10:32197099-32199491	0.0676652	0.243059	0.689334	1.01118	1.26688	0.565343	chr10	32197099	32199491	-	2	755.39	0.2353	circRNA	ARHGAP12	NM_001270695	3.2	chr10:32150586-32197099|chr10:32199491-32217610
chr10:32740519-32762951	0.0270661	0.149575	0.2585	0.763155	0.390846	0.296805	chr10	32740519	32762951	+	7	330,93,84,21,33,62,57	0,1752,4659,11091,11425,20889,22375	circRNA	CCDC7	NR_109827	2,3,4,5,6,7,8	chr10:32735559-32740519|chr10:32762951-32800436
chr10:32759991-32762951	0.013533	0.0186969	0.0287223	0.133552	0.0404324	0.0565343	chr10	32759991	32762951	+	3	167,62,57	0,1417,2903	circRNA	CCDC7	NM_001026383	7,8,9	chr10:32751977-32759991|chr10:32762951-32780849
chr10:32832227-32873232	0.0405991	0.0560906	0.157972	0.248025	0.0673873	0.098935	chr10	32832227	32873232	+	7	86,55,63,222,35,274,73	0,947,22258,24370,28559,39734,40932	circRNA	CCDC7	NM_001321115	13,14,15,16,17,18,19	chr10:32807433-32832227|chr10:32873232-32923181
chr10:32854485-32873232	0.013533	0.0934844	0.0430834	0.209868	0.242594	0.127202	chr10	32854485	32873232	+	5	63,222,35,274,73	0,2112,6301,17476,18674	circRNA	CCDC7	NM_001321115	15,16,17,18,19	chr10:32833229-32854485|chr10:32873232-32923181
chr10:34558584-34573173	0	0.0280453	0.0143611	0.133552	0.134775	0.0706679	chr10	34558584	34573173	-	2	243.111	0.14478	circRNA	PARD3	ENST00000545260	20.19	chr10:34420511-34558584|chr10:34573173-34606034
chr10:43650344-43671480	0.0405991	0.00934844	0.0287223	0.0953944	0.0269549	0.0706679	chr10	43650344	43671480	+	6	914,217,102,179,95,82	0,3818,5597,8969,12107,21054	circRNA	CSGALNACT2	NM_018590	2,3,4,5,6,7	chr10:43634015-43650344|chr10:43671480-43678697
chr10:49609654-49618211	0.0270661	0.00934844	0.100528	0.0953944	0.0539098	0.113069	chr10	49609654	49618211	+	4	171,130,59,139	0,3240,8267,8418	circRNA	MAPK8	NM_001278547	2,3,4,5	chr10:49514864-49609654|chr10:49618211-49628197
chr10:51123962-51364771	0.0270661	0.0560906	0.0430834	0.0953944	0.0539098	0.0565343	chr10	51123962	51364771	-	6	75,84,119,188,987,67	0,6419,6630,237760,238838,240742	circRNA	PARG	NM_001303486	7,6,5,4,3,2	chr10:51093341-51123962|chr10:51364771-51371284
chr10:51374369-51387763	0.013533	0.0186969	0.0861668	0.114473	0.161729	0.098935	chr10	51374369	51387763	+	5	59,94,85,59,111	0,7069,7392,9929,13283	circRNA	TIMM23B	NM_001290117	2,3,4,5,6	chr10:51371646-51374369|chr10:51387763-51732771
chr10:51584615-51585599	0	0.00934844	0.0718056	0.114473	0.0673873	0.0706679	chr10	51584615	51585599	+	1	984	0	circRNA	NCOA4	ENST00000438493	9	chr10:51582939-51584615|chr10:51585599-51586270
chr10:51606987-51620382	0.0270661	0.0747875	0.12925	0.0953944	0.175207	0.127202	chr10	51606987	51620382	-	5	111,59,85,94,59	0,3405,5916,6230,13336	circRNA	TIMM23	ENST00000260867	6,5,4,3,2	chr10:51592619-51606987|chr10:51620382-51623108
chr10:51829306-51840691	0.013533	0.0373937	0.0574445	0.0572367	0.0808647	0.0565343	chr10	51829306	51840691	+	3	165,63,174	0,9128,11211	circRNA	FAM21A	ENST00000314664	3,4,5	chr10:51827987-51829306|chr10:51840691-51843831
chr10:52193235-52226692	0.0270661	0.112181	0.244139	0.286183	0.175207	0.310939	chr10	52193235	52226692	-	3	81,142,43	0,27197,33414	circRNA	SGMS1	NM_147156	6,5,4	chr10:52104105-52193235|chr10:52226692-52279590
chr10:52193235-52279681	0	0.0373937	0.0287223	0.190789	0.161729	0.0706679	chr10	52193235	52279681	-	4	81,142,43,91	0,27197,33414,86355	circRNA	SGMS1	NM_147156	6,5,4,3	chr10:52104105-52193235|chr10:52279681-52349912
chr10:52193235-52350007	0.108264	0.280453	0.373389	0.953944	1.59034	0.79148	chr10	52193235	52350007	-	5	81,142,43,91,95	0,27197,33414,86355,156677	circRNA	SGMS1	NM_147156	6,5,4,3,2	chr10:52104105-52193235|chr10:52350007-52383466
chr10:52220432-52226692	0.0270661	0.0560906	0.0574445	0.0953944	0.10782	0.098935	chr10	52220432	52226692	-	2	142.43	0.6217	circRNA	SGMS1	NM_147156	5.4	chr10:52193316-52220432|chr10:52226692-52279590
chr10:52220432-52350007	0.013533	0.0560906	0.100528	0.305262	0.323459	0.113069	chr10	52220432	52350007	-	4	142,43,91,95	0,6217,59158,129480	circRNA	SGMS1	NM_147156	5,4,3,2	chr10:52193316-52220432|chr10:52350007-52383466
chr10:5810175-5842668	0.013533	0	0	0.0572367	0.0269549	0.0565343	chr10	5810175	5842668	-	7	172,100,132,199,135,100,108	0,5629,16929,17639,26672,28550,32385	circRNA	GDI2	ENST00000380191	8,7,6,5,4,3,2	chr10:5808601-5810175|chr10:5842668-5855176
chr10:5815804-5842668	0.0676652	0.196317	0.373389	0.400657	0.390846	0.424007	chr10	5815804	5842668	-	6	100,132,199,135,100,108	0,11300,12010,21043,22921,26756	circRNA	GDI2	ENST00000380191	7,6,5,4,3,2	chr10:5810347-5815804|chr10:5842668-5855176
chr10:5827104-5842668	0.0811982	0.0467422	0.157972	0.209868	0.10782	0.169603	chr10	5827104	5842668	-	5	132,199,135,100,108	0,710,9743,11621,15456	circRNA	GDI2	ENST00000380191	6,5,4,3,2	chr10:5815904-5827104|chr10:5842668-5855176
[truncated: 2,457 more rows]

## Sheet: DE HC circRNA
ID	baseMean	log2FoldChange	lfcSE	stat	pvalue	padj	strand	Significant?	exonCount	exonSizes	exonOffsets	circType	geneName	isoformName	index	flankIntron
[truncated: 2,531 more rows]

## Sheet: CLR
ID	CD42neg_CLR	CD42pos_CLR
[truncated: 2,526 more rows]

## Sheet: ncRNA
Gene.stable.ID	MK1_42neg_ncRNA	MK2_42neg_ncRNA	MK3_42neg_ncRNA	MK1_42pos_ncRNA	MK2_42pos_ncRNA	MK3_42pos_ncRNA	PLT1_ncRNA	PLT2_ncRNA	PLT3_ncRNA
[truncated: 14,729 more rows]

[truncated: 1 more sheets: mRNA]
