# Supplementary material
Source: HighWire-hosted journal article supplement (doi:10.1101/rna.078754.121)
Supplement: Supplemental_Table_S4.xlsx [file Supplemental_Table_S4.xlsx]

## Sheet: Legend
Nicolet et al.	Table S4: Ribo-seq expression in erythroid and megakaryoid differentiation
Tab name	Description	Unit
Ery ribo-seq	Ribo-seq density on mRNA in reticulocytes from Mills et al.	TPM
Mk ribo-seq	Ribo-seq density on mRNA in megakaryocytes	TPM
Plt ribo-seq	Ribo-seq density on mRNA in platelets from Mills et al.	TPM
Ery circ RFP	circRNA-specific ribosome footprint read in reticulocytes from Mills et al.	Raw CE2 counts
MK circ RFP	circRNA-specific ribosome footprint read in megakaryocytes	Raw CE2 counts
Plt circ RFP	circRNA-specific ribosome footprint read in platelets from Mills et al.	Raw CE2 counts
riboCLR Erys	ribosome circular over linear ratio (ribo-CLR) of reticulocytes from Mills et al	ribo-CLR
riboCLR Mk	ribosome circular over linear ratio (ribo-CLR) of megakaryocytes	ribo-CLR
riboCLR Plt	ribosome circular over linear ratio (ribo-CLR) of platelets from Mills et al	ribo-CLR

## Sheet: Ery ribo-seq
Name	TPM_ery1	TPM_ery2	TPM_ery3_globin_minus	TPM_ery4_globin_minus
ENST00000000233.9	0.19196	0.182876	4.44536	2.32952
ENST00000000412.7	0.055632	0	0	0
ENST00000001008.5	0.027838	0	0.644654	0
ENST00000002165.10	0.132895	0.059158	0.512926	2.20069
ENST00000002596.5	0.015252	0.017309	0	0.159944
ENST00000005178.5	0	0	0.673007	0
ENST00000005257.6	0.036157	0	0	0
ENST00000006750.7	1.41143	0	0	8.96623
ENST00000007390.2	0.169823	0.340181	0	0.468698
ENST00000007516.7	2.51729	3.80165	26.0228	21.5029
ENST00000007708.7	0	0	2.75317	0
ENST00000008180.13	4.96173	4.00553	0	6.99602
ENST00000008527.9	0	0.127542	0	0
ENST00000009530.11	62.8666	65.2086	622.638	351.621
ENST00000009589.7	2.73195	0	50.2985	21.8262
ENST00000011473.6	0.068074	0.219718	0	0
ENST00000011619.5	0.501374	0.312458	3.09618	3.32101
ENST00000011653.8	0.308983	1.16268	6.64934	0
ENST00000011691.5	0.548312	0	11.1104	14.3763
ENST00000011700.10	1e-06	1e-06	1e-05	2e-06
ENST00000012049.9	0	0.183578	0	0
ENST00000012134.7	0	0	3e-06	1e-06
ENST00000012443.8	0	0	2.92196	0
ENST00000013125.8	0.027579	0	1.10392	0
ENST00000013222.5	0	0	0.472346	8.79971
ENST00000016171.5	0.26901	0	3.65529	3.04143
ENST00000022615.8	0	0.259493	8.15487	0.973673
ENST00000025301.3	0.062531	0.055671	0.724039	1.20807
ENST00000025399.10	0.510671	0	0	2.48969
ENST00000028008.9	0.876576	0.335481	7.93936	1.21563
ENST00000031146.8	0.044984	0	0.336619	0
ENST00000033079.7	0	0.051177	0	0
ENST00000034275.12	1.07068	0	0	0
ENST00000035307.6	0	0.139438	0.302248	0
ENST00000037243.6	5.14521	2.93393	51.021	18.1687
ENST00000037869.7	0	0.077731	0	0
ENST00000039989.8	0.163226	0	0	0
ENST00000040584.5	0	0	0	0.305914
ENST00000040663.7	0.241694	0.161383	2.79854	0
ENST00000040738.9	0.169869	0.182919	1.13286	1.0261
ENST00000040877.1	0.080833	0.107947	0	0.33464
ENST00000053243.5	0	2.85305	11.3915	8.81631
ENST00000053468.3	0.297211	0.264603	2.43801	1.36718
ENST00000054950.3	0.081072	0	0	0.671254
ENST00000055335.10	0.03039	0	0.35188	0
ENST00000056233.3	0	0	0	0.155592
ENST00000057513.7	0	0.061884	0	0
ENST00000064778.8	0	0	0.164246	0.078299
ENST00000066544.7	0.107154	0.044702	0	0
ENST00000074304.9	0	0.026084	0.46671	0
ENST00000075120.11	0.203535	0	2.44686	2.39599
ENST00000075322.10	0	0	0	0.21701
ENST00000075430.11	0.104906	0	0	0
ENST00000075503.7	0	0.046413	0	0
ENST00000078429.8	0	0	0.289844	0
ENST00000078527.8	0.04409	0	0	0
ENST00000081029.7	0.175293	0	0	0.641081
ENST00000083182.7	0.036316	0.085384	0.231164	0.473839
ENST00000085079.11	0.221577	0	2.56561	1.4677
ENST00000085219.9	0	0.159729	0	0
ENST00000155674.9	0.181271	0	0	0
ENST00000155926.8	0.11795	0	0	0.652224
ENST00000156109.6	0.481413	0.321447	2.7871	5.64682
ENST00000156471.9	0	0	2e-06	1e-06
ENST00000156825.5	0.030456	0	0	0
ENST00000158762.7	0.19013	0.42726	3.3649	4.32132
ENST00000159111.8	0	0.0557	0	0
ENST00000160262.9	0.959827	1.01167	8.87939	6.57113
ENST00000160740.7	0.152539	0.135804	2.15872	4.39707
ENST00000160827.8	0	1.25506	3.26087	0
ENST00000161863.8	0.026586	0.10948	1.13909	0.275311
ENST00000162391.7	0.037526	0	0.651753	0.517838
ENST00000163416.6	0	0	0.811958	0.580612
ENST00000164024.4	1e-06	0	0	0.047707
ENST00000164133.6	0	0	0	1.4665
ENST00000166345.7	0.039002	0	0.522916	0.247495
ENST00000167218.9	0	0	0	1.37086
ENST00000167825.5	0.034487	0	0	0
ENST00000168216.10	1.32867	1.03504	21.7947	15.2793
ENST00000169298.7	0.035955	0	0	0
ENST00000170168.8	0.067788	0	0	0.249452
ENST00000170447.11	0.036567	0	0	0
ENST00000170564.6	0	0	0.344666	0
ENST00000171111.9	0	0	1.63169	0
ENST00000171757.2	0	0	3.60688	1.67672
ENST00000171887.8	0.083436	1e-06	7e-06	2e-06
ENST00000172853.14	2e-06	0	0	0.000358
ENST00000173527.5	0.215767	0	0	0.5955
ENST00000173785.4	0.93998	1.32879	0	0
ENST00000175091.4	0.89069	0.893708	4.81281	6.22753
ENST00000175756.9	0.076362	0.105327	0	0
ENST00000176763.9	0.50161	0.193834	2.57279	1.14197
ENST00000177694.1	0.202679	0.108266	3.2944	1.11876
ENST00000178640.9	0.04447	0	0	0
ENST00000179259.5	0.187219	0.050004	1.30067	0.620459
ENST00000181839.9	0	0	3e-06	0.320996
ENST00000182377.8	0	0	0	0.826234
ENST00000182527.3	0.03037	0	0.173515	0
ENST00000184183.8	0.130073	0	0	0
ENST00000184266.2	4.49442	3.94761	39.0068	22.5721
ENST00000186436.9	0.265074	0.249874	1.98599	0.774618
ENST00000189444.10	0.044508	0.138491	0.892694	1.14487
ENST00000190983.4	0	0.100189	1.73738	0.828239
ENST00000191018.9	0.882462	0	4.47033	2.4529
ENST00000191063.8	0	0.089506	0	0.369961
ENST00000192788.5	0.5728	0.559803	3.50003	1.49249
ENST00000193322.7	0.026189	0	0	0
ENST00000194118.8	0.331913	0.219404	0	1.06558
ENST00000194214.9	0.336004	2.17521	24.2488	14.31
ENST00000194530.7	1.5418	2.77544	0	0
ENST00000196061.4	0	0.04729	0.410023	0
ENST00000196371.9	0.644458	0.132259	2.40662	1.47111
ENST00000196551.7	5.65432	6.38058	87.294	47.7069
ENST00000197268.12	0	0	0.515823	0
ENST00000198536.6	0.16019	0	1.14032	0
ENST00000198939.6	0.186355	0.083377	0	0.982244
ENST00000199320.8	0	0	0	0.40212
ENST00000199389.10	0.037334	0.298163	4.64696	2.50376
ENST00000199706.12	1.25358	2.57549	21.2142	5.09025
ENST00000199708.2	23.1783	21.7215	209.524	118.963
ENST00000199764.6	0.038593	0.257694	0	0.213029
ENST00000199814.8	0	0.188534	0	0
ENST00000200135.7	0	0	0	1.15221
ENST00000200453.5	1.20108	1.37303	15.8166	6.298
ENST00000200557.10	0.204259	0.121233	0.788361	0
ENST00000200639.8	1.10443	0.997285	7.24074	5.40623
ENST00000200652.3	0.09492	0	0	0.523941
ENST00000202017.5	0.314117	0.139827	1.81855	1.4449
ENST00000202677.11	0	0.022482	0.194932	0.278785
ENST00000202773.13	9.53288	10.2845	114.495	75.4391
ENST00000202816.5	0.064689	0	0.374515	0.714151
ENST00000202834.11	0	0.476992	9.09865	3.25911
ENST00000202917.9	0.749901	1.15551	10.2792	2.73575
ENST00000203166.9	0.024561	0	0	0
ENST00000203556.8	0.293766	0	0	0
ENST00000203629.2	0.529988	0.236287	6.13665	4.68076
ENST00000203630.9	0.085998	0	0	0
ENST00000204549.8	0.101119	0.048781	1.26886	0.274822
ENST00000204566.6	0.084759	0	0	0
ENST00000204726.7	0	0	2e-06	1e-06
ENST00000204961.4	0.031495	0	0.364674	0
ENST00000205135.8	0	0.042418	0	0
ENST00000205194.4	0	0	0.792022	0
ENST00000205402.9	0	0	0	0.254179
ENST00000205636.3	0.295791	0.287336	0.431074	1.40818
ENST00000205890.10	0	0	0	1e-06
ENST00000206020.7	0	0.669069	5.7997	4.97727
ENST00000206262.1	0	0	0.742736	0
ENST00000206380.7	0.478818	0.639429	0.792022	2.643
ENST00000206423.7	0	0	2e-06	0.091823
ENST00000206451.10	2.28929	4.22743	0	0
ENST00000207549.8	0	0.101876	2.4148	0.985011
ENST00000207636.9	0	0	2.77576	0
ENST00000209728.8	0	0.122761	0.24965	0.595064
ENST00000209875.8	0.097633	0.061091	0.631929	0.57021
ENST00000209884.4	0.036409	0.040584	0.35188	0.81701
ENST00000210227.4	0	0.336908	0	0
ENST00000210313.7	0.046333	0.068565	0	1.18706
ENST00000210444.5	0.903441	1.08584	6.27648	0
ENST00000211287.8	0	0.136095	0	0
ENST00000211314.4	0.32113	0	3.71831	2.95431
ENST00000211377.7	0	0	0	0.13864
ENST00000211379.9	0	0.705747	0	0
ENST00000211921.11	0	0	0	2.04188
ENST00000211998.9	0	0.196625	2.72935	0.464039
ENST00000212015.10	0	0.135459	0.293623	0
ENST00000212355.8	0	0	0.741813	0
ENST00000214869.6	0.157258	0	0	0
ENST00000215115.4	0	0	0	0.332554
ENST00000215531.5	0.898917	0.367731	7.56963	2.72862
ENST00000215570.7	0.145082	0.198073	1.73645	1.49411
ENST00000215574.8	1.32223	0	15.7268	3.1222
ENST00000215587.11	0	0	3.03524	4.07399
ENST00000215631.8	0.164526	0.401551	0	0
ENST00000215739.12	0	0	0	0.125248
ENST00000215793.12	0.254189	0.205286	1.72524	1.21053
ENST00000215794.7	0	0	0	0.270952
ENST00000215798.10	0.063553	0	0	0
ENST00000215829.7	0	0.280699	0.955738	0
ENST00000215832.10	0.153	0.066826	0.521458	0.396794
ENST00000215862.8	0.114428	0	0	0.522041
ENST00000215886.5	0.366842	0	0	0
ENST00000215904.6	0.208143	0	0	0
ENST00000215906.5	0	0.041364	0.358647	0.170974
ENST00000215909.9	15.9186	21.2582	166.337	72.2125
ENST00000215912.9	0.211065	0.389234	5.23459	0
ENST00000215917.11	0.061598	0.068985	1.07197	0
ENST00000215956.9	0	0	3.76337	0
ENST00000215980.9	0.550067	0.867633	11.4645	7.89434
ENST00000216019.11	0.118273	0.083428	0.36863	0.386253
ENST00000216034.5	0.258194	0.332655	4.81946	1.3215
ENST00000216038.5	0.773893	1.17128	9.55818	6.55005
ENST00000216044.9	0.533925	0.255658	5.06306	1.18215
ENST00000216061.9	0	0	0	0.168045
ENST00000216083.6	0.214269	0	4.90718	0
ENST00000216099.12	0	0	0	1.04184
ENST00000216106.5	0.030874	0.068522	0	0.174342
ENST00000216115.2	0.111561	0.446948	3.87525	3.079
ENST00000216117.8	0.694551	0.13047	5.00684	1.89632
ENST00000216121.11	0.093372	0.31173	1.56645	0.6241
ENST00000216129.6	0.15358	0.041019	1.06698	0.339094
ENST00000216133.9	0	0.033973	0	0
ENST00000216144.3	0	0	0	0.614336
ENST00000216146.8	0	1.69914	22.4917	11.1386
ENST00000216160.10	0	0	0	0.532107
ENST00000216181.10	2.76235	2.1748	26.4887	14.1472
ENST00000216185.6	0.266347	0	2.13479	0
ENST00000216194.11	0	0	0	2.00184
ENST00000216218.7	0.089164	0.050914	1.43516	0.223639
ENST00000216223.9	0.241505	0.141437	2.12188	1.37064
ENST00000216225.8	5.13965	5.42812	58.078	41.7979
ENST00000216237.9	0	0	0	2.08999
ENST00000216252.3	0.386116	0.480377	1.73002	1.02582
ENST00000216254.8	1.25432	1.31975	12.3231	6.29425
ENST00000216259.7	0	0	0.940566	0
ENST00000216264.12	0.046633	0	1.13554	0.257917
ENST00000216268.5	0	0	0	0.331585
ENST00000216274.9	0.216902	0.289658	0	0
ENST00000216277.12	0.270673	0.13901	0.546424	0.183989
ENST00000216281.12	5.2806	5.80286	81.6326	56.8877
ENST00000216294.4	0.083458	0	0	0
ENST00000216297.6	1.21669	1.15333	14.1024	7.70075
ENST00000216327.10	0	0.400757	0	0
ENST00000216336.2	0.721698	0.32126	8.35644	2.65578
ENST00000216338.8	1.22616	0.690132	18.9887	6.90659
ENST00000216341.8	0	0	13.9823	8.8698
ENST00000216367.9	0	0	0	2.27991
ENST00000216373.9	0	0.075513	0	0.416164
ENST00000216414.12	0	0	0	6.61628
ENST00000216416.8	0	0	0.329755	0
ENST00000216446.8	0	0.63396	0	0
ENST00000216455.8	0	0	0	33.7581
ENST00000216456.6	0	0.640875	0	1.00918
ENST00000216468.7	0.066462	0.071004	0.153928	0.074337
ENST00000216471.4	0	0	0.470839	0
ENST00000216479.7	0.525548	1.10288	2.8005	3.61161
ENST00000216484.6	0.094119	0.043992	0.186289	0.071823
ENST00000216500.9	0.494509	0	0	0
ENST00000216517.10	0	0	0	0.721623
ENST00000216520.6	3.63693	6.14186	0	21.2509
ENST00000216554.7	0.018658	0	0	0
ENST00000216605.12	1.12804	1.20249	12.293	6.16751
ENST00000216639.7	0	0	10.9883	16.5793
ENST00000216727.8	0.620501	0.231283	1.23694	3.46247
ENST00000216774.10	0.230606	0.806462	2.48798	1.44694
ENST00000216797.9	1.28264	0	19.8536	4.46347
ENST00000216799.8	0	0.512382	0	0
ENST00000216802.9	0	0	0	1.32537
ENST00000216807.11	0	0	0	0.649543
ENST00000216832.8	0.14531	0.044561	0.817928	1.58621
ENST00000216927.4	0	0.192846	8.92951	0
ENST00000216962.8	0.028733	0.039447	1.77612	0.85467
ENST00000216968.4	0	0	0	0.431387
ENST00000217109.8	0	0.060827	0	0
ENST00000217131.5	0.703155	0	1.9898	6.98636
ENST00000217133.1	0.178395	0.039706	2.75414	0.997126
ENST00000217162.5	0	0	0	0.25867
ENST00000217173.6	0	0.130927	0	0
ENST00000217195.12	0	0	0	0.893951
ENST00000217398.3	0	0.144905	1.2564	0.598947
ENST00000217402.2	1.01999	0.936462	7.38143	6.68584
ENST00000217426.6	0.438857	0.195355	2.25842	1.61495
ENST00000217455.8	0.271508	0	6.2875	0
ENST00000217456.2	0.472265	0	5.46829	0
ENST00000217652.7	0.261278	0	13.4479	1.15521
ENST00000217740.3	0.035524	0.053233	0.216283	0.20747
ENST00000217890.10	1.87095	2.14027	22.9361	10.9849
ENST00000217893.9	0.739827	0.403518	4.04612	6.48616
ENST00000217901.9	0.566388	0	0	0
ENST00000217957.9	0	0	0	18.7015
ENST00000217958.7	0	0	4.52767	0
ENST00000217971.7	0.547729	0.365728	4.43945	3.62805
ENST00000218089.13	0	0	6.96288	2.25029
ENST00000218104.5	0	0.037871	0	0
ENST00000218147.11	0	0	0.350023	0
ENST00000218230.5	0.302887	0.674142	5.84514	1.11459
ENST00000218340.3	0.191197	0.14591	1.58143	1.65845
ENST00000218348.7	0.101245	0	2.52495	1.02958
ENST00000218364.4	0.45047	0.551442	3.91194	2.69374
ENST00000218388.8	0	1.27611	12.4475	4.05165
ENST00000218439.8	0	0	0	3.83463
ENST00000218516.3	1.01372	1.17475	9.25972	8.01371
ENST00000218758.9	0	0	0	3.19862
ENST00000219022.2	0	0	0	0.198396
ENST00000219066.5	0	0	6.48245	0
ENST00000219084.10	0	0	1e-06	0
ENST00000219150.9	0.466984	0	28.1176	0
ENST00000219204.7	0.210776	0	0	0.598538
ENST00000219240.8	0.08601	0	0	0
ENST00000219252.9	0.150961	0.339398	2.94275	1.311
ENST00000219271.3	0.024421	0	0	0
ENST00000219281.7	0	0.183302	0	0
ENST00000219313.8	1.19352	0	0	0
ENST00000219343.10	0	0.023992	0	0
ENST00000219345.9	0	0.051023	0	0
ENST00000219473.11	0	0	0	0.460619
ENST00000219535.7	0.132667	0	0	0
ENST00000219542.3	0	0.155372	0	0
ENST00000219596.5	0.059414	0	0	0
ENST00000219611.6	0.065588	0.058392	0	0
ENST00000219782.10	0.168726	0	2.6832	0
ENST00000219797.8	0.344527	0.184037	3.19138	0.760695
ENST00000219821.9	31.1743	50.6633	742.897	350.031
ENST00000219837.11	0.018381	0	0	0
ENST00000219905.11	1e-06	2e-06	1.8e-05	3e-06
ENST00000220003.13	0.412129	0.20111	0	0.94705
ENST00000220325.8	0.016141	0.107766	0.947557	0.534532
ENST00000220429.12	0.051813	0	0	0
ENST00000220509.9	0.159983	0.106824	0.368967	0.588722
ENST00000220514.7	0	0	0.98888	0
ENST00000220531.7	0.06343	0	0	0.90856
ENST00000220562.8	0.015972	0	0.369872	0
ENST00000220592.9	9.69161	6.02454	22.0638	19.6398
ENST00000220597.4	0.040584	0.115639	0.791605	0.424825
ENST00000220659.10	0	0.267405	0.463705	0
ENST00000220763.9	0.073085	0.143545	0	0
ENST00000220764.6	1.11048	0	0	0
ENST00000220849.9	1.73425	2.11623	22.2511	18.0969
ENST00000220853.7	0.424558	0	0	1.87479
ENST00000220913.9	0.042894	0	0	0
ENST00000220959.8	0.202728	0.234589	2e-06	1e-06
ENST00000221086.7	0	0.018489	0	0
ENST00000221130.10	0	0	0	0.900478
ENST00000221132.7	0.115176	0	0	0.410525
ENST00000221138.8	0	0.069631	0	0
ENST00000221200.8	0.122281	0.046002	0.707935	1.1812
ENST00000221233.8	0.47329	0	0	0
ENST00000221249.10	0	0	0	3.01267
ENST00000221265.7	0.083116	0	5.10976	0
ENST00000221283.9	0.347486	0	0	0
ENST00000221315.9	0	0.054027	0	0.223312
ENST00000221355.10	0.029376	0	0	0
ENST00000221363.8	0.494567	0.34384	4.93999	0
ENST00000221413.10	0	0	11.5322	8.63906
ENST00000221418.8	0	0	9.83456	5.65794
ENST00000221419.9	1.08453	0.95224	3.91487	6.5706
ENST00000221444.1	0	0.03171	0	0
ENST00000221494.9	0.639602	0.711788	10.4916	3.562
ENST00000221515.5	0	0	4.86182	5.7943
ENST00000221543.9	0	0.530141	2.04292	0
ENST00000221561.12	0	0.215063	4.07426	0
ENST00000221566.6	0.089598	0.119652	0	1.4837
ENST00000221576.4	0	0	7.01303	0
ENST00000221784.8	0.584589	0	4.51258	0
ENST00000221801.7	0	2.4343	16.1894	3.7115
ENST00000221804.4	0.340207	0.454323	0	0.938944
ENST00000221847.5	0	0.23796	2.06323	0.491789
ENST00000221922.10	0.099886	0.200087	0.578284	0.275678
ENST00000221930.5	0.451415	0.449367	4.79174	1.24598
ENST00000221972.7	6.03572	5.18506	23.0669	38.9027
ENST00000221975.6	7.50051	7.79949	64.9474	59.9538
ENST00000221978.9	4.03961	3.04432	74.7819	22.4437
ENST00000222002.3	0	0	0.632623	0
ENST00000222005.6	0.979252	0	8.31498	4.32425
ENST00000222008.10	1.69201	1.73813	18.0845	8.62121
ENST00000222120.7	0.072867	0	0	0
ENST00000222190.9	4.46311	2.51272	23.8217	18.8883
ENST00000222247.9	10.1474	8.58485	105.683	57.501
ENST00000222250.4	0	0	0	0.459984
ENST00000222266.2	0.718346	0.900646	4.15881	6.93902
ENST00000222308.8	21.6359	24.5598	89.738	61.5705
ENST00000222330.7	0	0.446327	0	0
ENST00000222345.10	0.053781	0	0	0.429002
ENST00000222388.6	0	0.319678	2.26712	2.06824
ENST00000222553.7	0.122424	0.200908	0	0.241418
ENST00000222567.5	0.030255	0.163222	0.915086	0.581651
ENST00000222584.7	0.101443	0.096059	1.76188	0.373298
ENST00000222597.6	0	0	1.51314	2.56718
ENST00000222690.10	0.092635	0.126761	0	0.338034
ENST00000222693.4	0.027444	0	0	0
ENST00000222969.9	0.904413	1.7789	0	0
ENST00000222990.7	0	0	0.254061	0
ENST00000223023.4	0	0	0.270898	0.129142
ENST00000223029.7	1.03427	0.460401	2.53337	5.07022
ENST00000223073.6	4e-06	2e-06	2.1e-05	2.2e-05
ENST00000223084.7	0.427932	0	0	0
ENST00000223114.8	0.050555	0	0	0
ENST00000223122.3	0.08043	0.052539	0.656813	0.530021
ENST00000223127.7	0.090148	0.157045	0	0.916909
ENST00000223129.8	0	0.095418	0	0.877554
ENST00000223136.4	6.92369	10.0442	123.943	93.9072
ENST00000223145.9	0.100972	0.233619	0.760264	0
ENST00000223190.8	0.086081	0.229912	0.996725	0
ENST00000223210.4	0	0.021968	0	0
ENST00000223293.9	0.290373	0.581662	3.36219	2.00352
ENST00000223321.8	2.32938	1.88833	17.7332	10.0161
ENST00000223324.2	0.307403	0.19547	11.8646	3.39364
ENST00000223336.10	1.01078	0	0	0
ENST00000223361.7	0.131483	0	0	1.08865
ENST00000223368.6	0.184826	0	0.613349	0
ENST00000223459.10	0.271707	0	0	0
ENST00000223500.8	0.498327	0.190138	6.59435	3.5366
ENST00000223641.4	7.59135	4.26852	60.1415	33.0814
ENST00000223642.2	0.018963	0	0	0
ENST00000223791.7	0.157907	0	0	0
ENST00000223795.2	0	0.07334	0	0
ENST00000223836.10	0.604882	1.00993	11.674	0
ENST00000223864.6	0.114156	0	5.28717	1.89037
ENST00000223865.8	0.03078	0	0	0.21544
ENST00000224073.5	3.93575	3.15262	46.606	27.3313
ENST00000224140.5	0.260709	0.497371	3.77339	3.08373
ENST00000224237.9	3.60485	3.74279	33.8426	20.538
ENST00000224721.11	0	0	2e-06	0
ENST00000224784.10	0	0.208666	1.80846	1.72425
ENST00000224807.9	0	0	0	0.191453
ENST00000224949.8	0	0	4.18677	2.16223
ENST00000225174.7	0	0.077978	0.75552	0
ENST00000225275.3	0.226484	0.518493	1.87316	0.714375
ENST00000225298.11	0.497449	0.442874	4.47992	2.44075
ENST00000225308.12	5.26486	3.77871	0	0
ENST00000225371.5	0	0	0	0.212393
ENST00000225388.8	0.085735	0.10933	0.882416	0.727904
ENST00000225430.8	12.6104	14.3269	149.35	89.0327
ENST00000225519.3	0.037833	0	0	0
ENST00000225525.3	0.152942	0	2.65633	1.68843
ENST00000225538.3	0.077273	0	0	0.213268
ENST00000225573.5	0.159763	0	0	0
ENST00000225576.7	0	0.105378	0	0
ENST00000225577.8	0.034201	0.02977	0.669755	0
ENST00000225603.8	0	0.24995	0	0.774852
ENST00000225655.5	4.05623	5.21217	53.3825	42.9303
ENST00000225696.8	0.160563	0.090405	0	0
ENST00000225698.8	3.97863	3.38112	42.5675	21.9614
ENST00000225719.8	0.121079	0	0.192615	0.094884
ENST00000225726.9	0	0.064418	0	0.707531
ENST00000225737.10	0	0	0	0.562948
ENST00000225742.13	0	0.93276	5.72394	0
ENST00000225805.8	0.018946	0	0	0
ENST00000225927.6	0	0	0.590027	0
ENST00000225964.9	0	0	0	0.084951
ENST00000225969.8	2.70085	2.60492	15.6364	14.9083
ENST00000225972.7	0.064228	0.286692	0.828586	1.38251
ENST00000226105.10	0	0	0	2.32245
ENST00000226279.7	0.173686	0.034886	0.685493	1.14464
ENST00000226522.8	0	0.115583	1.90672	0
ENST00000226524.3	0.209092	0	0	0
ENST00000226574.8	0	0.068787	1.0218	1.53152
ENST00000226796.6	0	0	0	1.02988
ENST00000226798.8	0.826461	0.379451	15.4064	9.53563
ENST00000227155.8	0	0.547442	0	0
ENST00000227163.8	0.452514	0	0	0
ENST00000227266.9	2.56072	2.82974	26.4329	20.8867
ENST00000227378.7	0	1.86707	0	20.3628
ENST00000227471.6	0.27044	0.166567	1.56569	0.746393
ENST00000227520.9	0.221207	0	1.92099	0.915772
ENST00000227524.8	1.16258	1.16442	6.2851	3.81371
ENST00000227525.7	0.16493	0	9.01191	5.96686
ENST00000227752.7	0.337423	0.135736	0	0
ENST00000227758.6	0.068571	0	0	1.07203
ENST00000227868.8	0	0.073576	0	1.92881
ENST00000228136.8	0.414985	0.651164	4.18984	1.74854
ENST00000228140.6	10.5692	11.3307	113.569	59.3001
ENST00000228251.8	44.179	43.6701	309.688	234.73
ENST00000228306.8	0.701784	0	0	0
ENST00000228434.7	1.48251	2.92887	15.8445	18.46
ENST00000228437.9	0.073965	0	0	0
ENST00000228438.2	1.20474	2.22431	28.1126	16.0697
ENST00000228463.6	0	2.87648	25.7221	0
ENST00000228506.7	0	0.041734	0.412158	0.101889
ENST00000228515.5	0	0	0.268703	0
ENST00000228740.6	0.315502	1.17435	13.5762	1.16216
ENST00000228741.7	0	0	0	0.27251
ENST00000228825.11	4.51795	8.10586	92.7199	41.9943
ENST00000228843.13	0	0.32254	0	0
ENST00000228862.3	0.091683	0.040812	0	0
ENST00000228865.2	0	0	0	0.516154
ENST00000228872.8	0.179658	0.151164	2.87942	3.89726
ENST00000228928.11	0.352777	0.271923	2.67618	1.23359
ENST00000228945.8	2.31182	3.59964	9.99464	0
ENST00000228955.11	0	0	2.6653	0
ENST00000229135.3	1.99403	2.54711	38.1463	18.6636
ENST00000229201.4	0.094854	0.063336	0	0
ENST00000229214.8	0	0.033816	0.368364	0.146025
ENST00000229238.4	0.589889	0.345012	5.77123	0.713825
ENST00000229265.10	0	0.564625	0	1.28542
ENST00000229266.7	0	0	0	13.1645
ENST00000229307.8	0	0	0	0.111904
ENST00000229314.9	0.041484	0	0	0
ENST00000229329.6	0	0	0.993461	1.61832
ENST00000229379.2	5.47242	7.01695	93.752	23.3412
ENST00000229390.7	0.527727	0.822201	8.14729	6.79693
ENST00000229395.7	0	0	2.82877	0
ENST00000229402.3	0.217934	0.194024	3.36456	1.60395
ENST00000229563.5	0	0.223966	0	0
ENST00000229595.5	0.309292	0.312326	5.11606	3.96895
ENST00000229633.6	0	0	0	18.5159
ENST00000229634.13	0	0.139097	0	0.227804
ENST00000229758.7	0.718703	1.09689	10.5664	5.38396
ENST00000229769.2	0	0.054519	1.89082	0.450693
ENST00000229794.8	0	0	0.393663	0
ENST00000229812.7	0.261557	0.388102	3.36504	1.28334
ENST00000229854.11	2.08857	0.679927	3.61779	7.12917
ENST00000229866.10	0	0	2.27891	0
ENST00000229971.2	0.148267	0	1.23585	0
ENST00000230048.4	0.025655	0	0	0.167219
ENST00000230050.3	22.839	28.1493	345.783	224.902
ENST00000230085.12	0	0	0	1.9668
ENST00000230122.3	0.056329	0.025075	0.217409	0
ENST00000230124.7	0.172841	0	2.0013	0.381623
ENST00000230413.9	0	0.565257	0	0
ENST00000230431.10	0.492433	0.219204	0	0
ENST00000230449.8	0.186575	0.06229	1.89028	0.772398
ENST00000230568.4	2.13945	1.48941	12.2888	12.4995
ENST00000230640.9	0.077994	0.168739	0	0
ENST00000230859.7	0.019058	0	0.219812	0
ENST00000230895.10	0.156121	0.297965	0	2.4632
ENST00000231009.2	0.905455	0.837121	8.87119	5.04042
ENST00000231198.11	0.06698	0.04509	0	0.378034
ENST00000231238.9	0	0.861571	1.66005	0
ENST00000231368.9	0.057335	0.066539	0.518301	0.37951
ENST00000231461.9	0.350127	0.285237	2.87662	1.60555
ENST00000231498.7	0.026225	0.107045	0.56939	0
ENST00000231509.7	0.146134	0	0	0
ENST00000231512.4	0.398344	0.338415	2.60699	0.926689
ENST00000231524.13	0.049595	0.033115	0	0
ENST00000231572.7	0.286144	0.260668	6.20187	2.19543
ENST00000231721.6	0.021167	0	0	0
ENST00000232014.8	0	0.154039	0	0
ENST00000232125.9	0.667633	1.24821	9.27651	1.61894
ENST00000232165.7	0	0.137056	0	0
ENST00000232424.3	0.133096	0	0.770547	1.102
ENST00000232458.9	0.066293	0	0	0
ENST00000232496.4	0	0	1.10379	0
ENST00000232519.9	0	0	0	1.72163
ENST00000232564.7	0	0	0.52074	0.221285
ENST00000232744.12	3.08792	1.94888	0	10.2898
ENST00000232888.6	0.266191	0.08887	0	0.367334
ENST00000232905.3	4.44093	5.5972	48.2705	30.7154
ENST00000233027.9	0.052222	0	0	0
ENST00000233055.8	0.044518	0.064128	0.659381	0
ENST00000233057.8	0.051459	0	0.136089	0.357716
ENST00000233084.7	0	0.491262	0	0.72161
ENST00000233092.10	0	0	3.57716	0
ENST00000233099.5	0.119933	0.140142	1.04152	0.579261
ENST00000233114.12	1.69732	0.424221	11.568	8.25142
ENST00000233143.5	35.7588	40.0894	442.161	341.156
ENST00000233146.6	0	0	3.64118	0
ENST00000233154.8	0	0	0.449728	0
ENST00000233190.10	0.029164	0	4e-06	3e-06
ENST00000233336.6	0.18389	0.121994	1.37848	6e-06
ENST00000233468.4	4.86895	5.3875	49.9338	34.5547
ENST00000233573.6	0.415327	0	0	6.14424
ENST00000233607.6	0	0	2e-06	0
ENST00000233609.8	0	0	16.0524	0
ENST00000233612.8	0	0	2.15059	2.05045
ENST00000233615.6	0	0.217644	0	0
ENST00000233616.8	0	0	2.49877	0
ENST00000233809.8	0.073108	0	0	0
ENST00000233838.8	0	0	0.210074	0
ENST00000233892.8	0.033697	0.041443	0.734448	0
ENST00000233893.9	0	0	3.19208	0
ENST00000233948.3	0.061579	0	0	0
ENST00000233957.5	0	0.037902	0	0
ENST00000233997.3	0.820908	1.25288	2.71576	3.88396
ENST00000234111.8	0.588506	1.15416	2.97768	4.0532
ENST00000234115.10	0	0	0	0.233314
ENST00000234160.4	0.067983	0	0.841231	0
ENST00000234170.9	0.270164	0.60131	5.56122	2.74334
ENST00000234179.6	0.017558	0.070342	0	0
ENST00000234198.8	0	0.05679	0	3.05157
ENST00000234256.3	0.2502	0.138224	0.330019	0.748339
ENST00000234296.6	0.118314	0	0	0.223863
ENST00000234301.2	1.71328	3.43196	21.1907	9.98245
ENST00000234310.7	0.219458	0.176364	2.0235	2.36427
ENST00000234313.7	0.65334	0.727077	10.0866	5.78234
ENST00000234347.9	0.723749	0.966519	3.59151	0.570712
ENST00000234453.9	1e-06	0	0.206717	0.0545
ENST00000234549.11	0.32113	0	0	0
ENST00000234590.9	13.5055	16.0175	158.203	101.824
ENST00000234626.10	0.065574	0	0.449732	0.39709
ENST00000234677.6	1.244	0.604103	11.7852	3.48066
ENST00000234739.7	0.016496	0.022029	0.191003	0.091055
ENST00000234827.5	0	0	1e-06	0
ENST00000234875.8	0.646119	0.793469	5.6167	2.66806
ENST00000235090.9	0	0.243633	0	0
ENST00000235150.4	0	0	0	0.246855
ENST00000235180.4	0	0.03869	0	0
ENST00000235307.6	0	0.013449	0	0
ENST00000235329.9	0.297134	0	1.85256	1.89246
ENST00000235332.5	0	0	0	1.10557
ENST00000235345.5	0	0.044892	0.583847	0.185554
ENST00000235382.6	1.86716	3.05822	34.2309	12.0241
ENST00000235521.4	0.045906	0.099358	0.430739	0
ENST00000235790.8	0	0	0	0.129639
ENST00000235878.5	0	0	1.49364	0.804726
ENST00000236051.2	0.249763	0.638793	0	7.23792
ENST00000236147.4	0.772127	0.401648	8.72802	4.77823
ENST00000236273.8	0.216585	0.627629	8.16277	0
ENST00000236698.9	0.047981	0	0	0.723324
ENST00000236937.13	0	0.300698	4.20803	3.04854
ENST00000236938.10	0	0	0	2.33912
ENST00000236957.9	0	1.93587	22.3606	20.3593
ENST00000236959.13	1.36877	0	0	0
ENST00000237281.4	0.011479	0.01533	0.26583	0.380178
ENST00000237283.8	0	0	0.586237	0.279469
ENST00000237289.8	0	0.10728	0	0
ENST00000237380.11	0.011315	0.030368	0.428719	0.121159
ENST00000237455.4	0	0.039925	0	0
ENST00000237500.9	0	0.481406	4.09034	5.14363
ENST00000237512.4	0	0	1.47903	0
ENST00000237530.10	1.52421	2.14934	17.0842	13.4325
ENST00000237536.8	0.00751	0.00965	0.08328	0.248496
ENST00000237642.6	0	0.081191	0.703968	29.4552
ENST00000237654.8	1.1593	0.519586	5.0538	4.96761
ENST00000237822.7	0.112638	0	0	0
ENST00000237837.1	0	0	0.402173	0.294374
ENST00000237853.8	0.062414	0.045757	0.466895	0.786851
ENST00000237858.10	0.410053	0.358964	0	0
ENST00000237889.8	1.03649	1.68636	31.2369	18.6744
ENST00000237937.7	0.066388	0	0	0
ENST00000238081.7	1.18268	0.969024	11.4846	4.61097
ENST00000238112.7	0	0.653825	8.76115	4.42228
ENST00000238256.7	0.119669	0.191771	0.973961	0.924773
ENST00000238341.9	0	0	0.766668	0.614969
ENST00000238477.5	0	0.187484	0	0
ENST00000238497.9	0	0.102418	1.10269	0
ENST00000238607.10	0	0.082728	0	0
ENST00000238609.3	0.666522	1.14306	4.95313	0
ENST00000238618.7	0	0	9.90857	1.90301
ENST00000238628.10	0	0	0	0.722999
ENST00000238647.4	0.103199	0.067932	1.16556	0.791599
ENST00000238667.8	0	0.038207	0	0
ENST00000238671.11	0.709183	0	2.5006	3.57713
ENST00000238688.9	9.88463	0	0	37.7362
ENST00000238714.7	0	0	0.281903	0
ENST00000238738.8	0.092152	0.140183	0.54035	0
ENST00000238789.9	0	0	0	0.422839
ENST00000238823.12	0.234833	0.246968	0.76443	1.18449
ENST00000238831.8	0.065863	0.039951	0.565156	0.406717
ENST00000238855.11	0	0	0	0.48646
ENST00000238892.3	0.267886	0	0	0
ENST00000239007.11	1.8617	0.121905	3.96595	5.52536
ENST00000239026.10	0.383547	0	0	0
ENST00000239151.5	0.051234	0	0	0
ENST00000239223.3	7.04484	6.71005	64.1773	36.599
ENST00000239231.6	0.047118	0.066306	0.364472	0.176227
ENST00000239666.8	0.394675	0	0	0
ENST00000239878.8	0.045581	0.177916	0	0
ENST00000239882.6	0.270932	0.266342	4.61854	2.67733
ENST00000239891.3	1.2828	0	10.6096	0
ENST00000239893.9	1.3218	1.10539	0	19.0928
ENST00000239906.9	0.11854	0.189963	0.823536	0.321032
ENST00000239938.4	0.099469	0.044278	0.767821	0.549051
ENST00000239940.11	0.138552	0.246702	0	0
ENST00000239944.6	0.128769	0.374871	2.02238	0.572874
ENST00000240055.7	0	0	0	1.31237
ENST00000240093.7	0.007515	0.010036	0	0
ENST00000240100.6	0	0	0.433398	0.516521
ENST00000240101.2	0	0.093966	0	0
ENST00000240316.4	0.117988	0.105044	0.91078	1.51965
ENST00000240364.6	1.25676	0	0	2.27234
ENST00000240423.8	0.227478	0	0	0.955796
ENST00000240487.5	0.251586	0	0.838579	0
ENST00000240499.7	0	0.046807	0	0.217327
ENST00000240617.9	0	0	0.497947	0.71214
ENST00000240618.10	0.47704	0	1.76697	2.03195
ENST00000240651.13	0.051208	0	0	0
ENST00000240719.7	0	0.050752	0	0
ENST00000240851.8	0.117564	0.141262	0	0
ENST00000240922.7	0.093164	0	0	0
ENST00000241052.4	1.95009	2.42252	18.6722	15.5205
ENST00000241261.6	0.155361	0.643939	0	0
ENST00000241393.3	2.0032	0.427953	54.1551	20.0321
ENST00000241463.4	0.068086	0	0	0
ENST00000241502.8	0.067821	0	0.175211	0
ENST00000241600.9	0.41762	0.650654	2.41778	0.546182
ENST00000241704.7	0.909552	0	9.55289	7.17227
ENST00000242059.9	0.019717	0	0	0.217674
ENST00000242208.4	0.017081	0	0	0
ENST00000242275.6	0.249149	0	0	1.03361
ENST00000242323.8	0.044372	0.05618	0.203919	0
ENST00000242351.9	0.11822	0.210365	0.446994	0.99611
ENST00000242465.3	14.164	15.2955	153.905	87.1375
ENST00000242505.10	0	0.025592	0	0
ENST00000242576.6	0	0	0	1.95054
ENST00000242577.10	2.49953	4.57003	0	34.515
ENST00000242592.8	0	0	1.86399	0
ENST00000242719.3	0.628894	0.256645	0.501392	3.35254
ENST00000242728.4	0	0.0723	0	0.448267
ENST00000242729.6	0	0	0	0.415632
ENST00000242776.8	3.02382	2.9909	27.3149	8.92854
ENST00000242784.4	0.985912	0	12.6841	0
ENST00000242786.5	0.336785	0	0	0
ENST00000242810.10	0	0.596964	2.79749	0
ENST00000242827.10	0.46591	0	0	0
ENST00000242848.8	0.180643	0.206774	2.15033	0.925898
ENST00000243045.9	0	0.13036	0	0
ENST00000243077.7	0.298348	0.31786	3.32907	2.18301
ENST00000243189.11	0.301723	0	0	0
ENST00000243253.7	0	0	1.22593	0.905695
ENST00000243326.9	0.012662	5e-06	0.147711	0.07202
ENST00000243344.7	0	0.05049	0.437769	0.445578
ENST00000243346.9	0.258676	0.949974	8.23673	3.90101
ENST00000243347.4	0	0	0	0.407885
ENST00000243349.12	0	0	0.133138	0
ENST00000243389.7	0	0	0	0.197844
ENST00000243440.1	0	0	1.25508	0
ENST00000243498.9	0	0	6.3195	0
ENST00000243563.7	0.454598	0	0	0
ENST00000243583.10	0	0.086574	0	0
ENST00000243639.8	0	0	0.307002	0.207722
ENST00000243706.8	0.017987	0.031972	0	0.162562
ENST00000243776.10	0	0.092265	0	0
ENST00000243903.5	0.176691	0.054469	0	0
ENST00000243918.9	0	0	0	0.401694
ENST00000243997.7	0.968576	0.676366	17.8966	11.3404
ENST00000244007.7	0	0.104764	0.961315	0
ENST00000244020.4	0.070248	0.044611	0.73653	0.2493
ENST00000244040.3	0.024456	0.037648	0.165288	0.131698
ENST00000244050.2	0.06221	0.083078	0.720325	0
ENST00000244051.2	0.020576	0.027114	0.243692	0.224148
ENST00000244070.7	0	0.095266	0.826005	0
ENST00000244204.10	0	0	2.94447	0
ENST00000244217.5	0	0.512382	0	0
ENST00000244221.8	0	0	0.190972	0
ENST00000244230.6	0	0.112147	4.99638	1.53158
ENST00000244336.9	0	0	0.524419	0
ENST00000244364.10	0.012217	0	0	0
ENST00000244496.5	0.456118	0.730937	2.11253	3.02124
ENST00000244519.6	0	0	0	2.18459
ENST00000244520.9	2.07901	5.41835	46.9797	34.294
ENST00000244533.7	0	0	0.635315	0
ENST00000244534.6	81.117	99.6618	795.89	519.268
ENST00000244537.5	194.106	256.352	2124.48	1347.38
ENST00000244546.4	0	0.206464	2.23768	0
ENST00000244571.4	0.107799	0.03599	0.624093	0.297516
ENST00000244573.4	1.16572	1.33434	19.2824	12.8691
ENST00000244576.8	0.025452	0.03399	0	0
ENST00000244670.12	0	0	1.27383	0
ENST00000244741.9	0	0.088926	0.748961	0
ENST00000244745.3	0.017703	0.094563	0.204976	0.390864
ENST00000244763.8	0	0	0.442651	0.118204
ENST00000244769.8	1e-06	1e-06	9e-06	3e-06
ENST00000244776.11	0.949061	0	0	0
ENST00000244777.6	0	0	2.47015	0
ENST00000244815.9	0	0	5.22414	2.87628
ENST00000245046.6	0.701086	0.874399	7.57744	4.32144
ENST00000245206.9	0	0.118021	0	0.776383
ENST00000245304.4	0.075546	0.13835	0.437442	0.625504
ENST00000245414.8	0.195174	0	0	0.328505
ENST00000245441.9	0.038039	1e-06	2e-06	3e-06
ENST00000245458.10	24.9483	34.5036	270.174	241.097
ENST00000245539.10	0	0	2.35002	3.30574
ENST00000245615.5	0	0	0	0.34773
ENST00000245796.10	0.448233	0.693768	5.78395	1.87497
ENST00000245812.7	0	0.316945	1.83205	1.31005
ENST00000245816.9	0	0.366117	0	0
ENST00000245857.9	6.0107	6.21046	96.4873	28.5797
ENST00000245903.3	0	0	0	1.28733
ENST00000245932.10	0.47236	0.216881	3.63504	1.39215
ENST00000245934.11	0.044275	0.235587	4.58407	1.09265
ENST00000245960.9	0.106396	0	3.01071	0.681878
ENST00000246006.4	0.030868	0	1.07224	0.1709
ENST00000246024.6	0	0.067261	0.984271	0.464025
ENST00000246043.8	0.514138	0	0	0
ENST00000246071.7	0.087613	0	0	0
ENST00000246080.3	0.061919	0	0	0
ENST00000246115.4	1.14089	0.627356	5.43948	2.0724
ENST00000246117.8	0.129631	0	0	0
ENST00000246149.10	0.212116	0	0	0
ENST00000246151.8	1.04785	1.92409	21.991	10.845
ENST00000246163.2	0	0	0	1.71972
ENST00000246194.7	0.311322	0.126202	0	0
ENST00000246229.4	0.036322	0.024253	0	0.100247
ENST00000246314.10	0.05415	0	0	0
ENST00000246337.8	1.59705	0	12.8023	0
ENST00000246421.4	0.220734	0	0	0
ENST00000246535.3	0	0.120543	0	0
ENST00000246551.8	0	0.566229	4.90215	14.9999
ENST00000246554.7	3.93918	3.46439	29.8962	25.515
ENST00000246657.2	0	0	1.74249	0.805409
ENST00000246672.3	0	0.050186	0.435136	0
ENST00000246784.7	0	0	2.48403	0
ENST00000246792.3	0	0.135626	0	1.12118
ENST00000246868.6	0	0.19174	0	1.01561
ENST00000246911.6	0.626802	0	0	0
ENST00000246949.9	0.095148	0	0.363023	0.319402
ENST00000246957.9	0	0.485787	0	0
ENST00000247020.8	0.334901	0	2.10014	0
ENST00000247026.9	0	0	1.09514	0
ENST00000247087.10	0.018203	0.02183	0.39437	0
ENST00000247161.7	0.115997	0	0	0
ENST00000247178.5	0.065616	0	0.253252	0.380303
ENST00000247207.6	0	0.050278	0	0
ENST00000247225.6	0.062798	0.125793	2.9085	1.0399
ENST00000247226.12	0	0	3e-06	0
ENST00000247271.4	0.053745	0	0	0
ENST00000247470.9	0	0	0	1.77627
ENST00000247665.11	0	0.959302	0	1.61282
ENST00000247668.6	0	0	0.534039	0.254586
ENST00000247815.8	1e-06	1e-06	0.130425	4e-06
ENST00000247833.11	0	0	0	0.466265
ENST00000247866.8	0	1.43127	22.6152	5.20113
ENST00000247930.4	0.096537	0	0.745055	0
ENST00000248070.10	0	0	2.47374	0
ENST00000248071.5	5.44176	3.99092	32.4057	22.8569
ENST00000248142.7	0.037704	0	0	0
ENST00000248248.7	0	0	0	0.216456
ENST00000248342.8	2.98991	0	0	0
ENST00000248378.5	0.165196	1.32365	11.4767	1.82372
ENST00000248420.9	0	0.052104	2.25885	0
ENST00000248437.8	1.07299	1.12448	14.3187	6.00984
ENST00000248451.7	1.27262	1.32184	3.27456	9.36625
ENST00000248553.6	0.479958	0.3883	0	0
ENST00000248564.5	0.068131	0.045492	0	0.188037
ENST00000248566.3	0.959892	0.560961	8.66456	5.54958
ENST00000248594.10	0	0	0	0.505478
ENST00000248598.5	0.57767	0.25315	5.64073	4.03573
ENST00000248846.9	0.147709	0	0	0
ENST00000248899.10	0.191101	0.201404	4.36568	0
ENST00000248901.10	0.119781	0	1.94769	1.00188
ENST00000248924.10	0	0.093774	0	1.55041
ENST00000248929.13	0	0	0	0.435643
ENST00000248958.4	1.60296	2.46997	4.28317	9.52871
ENST00000248975.5	0	0	3.32288	0
ENST00000249053.3	0.155607	0	0	0
ENST00000249071.10	0.623175	0.218399	1.77456	0.799666
ENST00000249116.6	0.252537	0	0	0
ENST00000249289.4	0.905122	1.22364	8.84132	3.37185
ENST00000249299.6	0.409758	0.863071	7.68781	4.34931
ENST00000249356.3	0.076755	0.060515	1.33311	1.27103
ENST00000249364.8	0	0.206821	1.27591	0
ENST00000249442.10	0	0.206232	0	0
ENST00000249499.7	0	0	0	0.309071
ENST00000249636.10	0.016268	0	0.440385	0
ENST00000249647.7	0.187449	0	0	0
ENST00000249700.8	0.022502	0	0	0
ENST00000249736.11	0.383492	0.512128	0	0
ENST00000249786.8	0	0	2.88353	0
ENST00000249822.8	0	0.246694	1.00985	0
ENST00000249837.7	0.033784	0.116886	3.43603	0.706944
ENST00000249923.7	1.13864	0	19.5952	0
ENST00000250018.6	0	0.025993	0	0
ENST00000250024.8	0	0.085743	0.371715	0
ENST00000250111.8	0.133053	0.056089	0.764134	0.208074
ENST00000250113.11	0.070412	0	1.22293	0
ENST00000250124.10	0	0	4.4129	0
ENST00000250237.9	0	0	0	2.65062
ENST00000250241.12	0	0	4.45815	0
ENST00000250263.7	0.079346	0.090052	0.345543	0.673551
ENST00000250377.11	0	0.033592	0	0
ENST00000250454.7	0	0	0	9.03628
ENST00000250495.9	0	1.19643	22.6675	11.2144
ENST00000250498.8	3.95296	4.31413	85.0127	30.4789
ENST00000250559.13	1e-06	0.023793	4e-06	0.155353
ENST00000250572.12	0	0.094612	0	0
ENST00000250617.6	0.419772	0.586342	5.97782	3.79967
ENST00000250784.12	0	0.205927	9.26631	6.74148
ENST00000250896.7	0.585927	0.49144	1.71985	1.67099
ENST00000250916.5	0	0	0.834378	1.59105
ENST00000250974.9	0.321932	0.343935	0	0
ENST00000251038.9	2e-06	2e-06	2.1e-05	1.2e-05
ENST00000251047.5	0.483191	0.472587	4.97473	3.61155
ENST00000251074.5	1.40487	0.938057	4.98361	9.69335
ENST00000251076.9	1e-06	1e-06	5e-06	3e-06
ENST00000251089.6	0	0.0308	0	0
ENST00000251108.10	0	0	0.355549	0
ENST00000251166.8	0.151268	0	0	0
ENST00000251170.11	0	0	0	0.088491
ENST00000251195.9	0	0	0	1.57969
ENST00000251241.8	0.198727	0	1.64359	0.36216
ENST00000251268.10	0.01182	0.014457	0	0
ENST00000251287.2	0	0	0	0.168393
ENST00000251303.10	3.009	3.24058	17.7509	14.7779
ENST00000251334.6	0.061671	0.248154	0	0.638787
ENST00000251376.7	0.058599	0	0.619876	0
ENST00000251413.7	0.325798	0.435082	0	0
ENST00000251453.7	7.19044	6.71517	79.7457	65.9921
ENST00000251496.6	0	0	0.761521	0.405314
ENST00000251507.8	0	0.262131	6.23058	3.19229
ENST00000251527.9	0.027225	0.128588	1.83422	0.443929
ENST00000251546.8	0.110426	0	0	0
ENST00000251595.11	258066	256259	88530.1	51174.7
ENST00000251654.8	0.742835	0	0	0
ENST00000251739.9	0	0	2.05082	0
ENST00000251775.8	0.05203	0.166256	0	0.687198
ENST00000251809.4	0	0	0.322036	0
ENST00000251810.7	0	0.033363	0.730464	0
ENST00000251822.6	0.019012	0	0.440272	0
ENST00000251849.8	0.059373	0	1.45959	0
ENST00000251900.8	0	0.033004	0	0.136772
ENST00000251968.3	0	0	4.17898	0
ENST00000252015.2	0	0.086118	2.98674	0
ENST00000252050.8	0	0	0.76995	0
ENST00000252102.8	0	0	0	21.0295
ENST00000252108.7	0.203653	0.105417	2.53929	0
ENST00000252115.9	0	0	2.00073	0
ENST00000252244.3	5.6606	5.28587	63.5721	42.0495
ENST00000252252.3	0	0	0	0.505104
ENST00000252268.8	0.172073	0.15258	1.22263	0
ENST00000252322.1	0	0	0	0.263792
ENST00000252440.11	0	0	1.74465	0
ENST00000252445.7	0.187415	0	0	3.46011
ENST00000252458.6	0	0	5.47513	0
ENST00000252487.9	0.091417	0	1.42262	0
ENST00000252506.10	0	0.265753	0	1.64768
ENST00000252512.13	0	0	1.54942	0
ENST00000252542.8	0.56408	0.321782	3.16801	0
ENST00000252575.10	0.016213	0	0	0
ENST00000252590.8	0.512615	0.238345	3.55363	1.68798
ENST00000252593.6	2.29072	4.03246	18.0206	19.2885
ENST00000252595.11	0	0.077229	0	0
ENST00000252599.8	0	0.149834	0.773465	0.15483
ENST00000252603.6	0	0.413393	0	0
ENST00000252622.14	4.23892	5.78172	0	15.8733
ENST00000252674.8	0.023768	0.030879	0	0.381197
ENST00000252699.6	0	0	0	0.239648
ENST00000252725.10	1.42957	0	0	13.2546
ENST00000252744.5	0.056515	0.100629	1.09425	0.669185
ENST00000252797.6	0	0.061693	0	0
ENST00000252804.8	0	0.020307	0	0
ENST00000252818.4	4.27169	2.10168	20.8258	16.4433
ENST00000252840.10	0.04604	0.061483	0	0
ENST00000252891.8	0.166292	0	0.393387	0
ENST00000252934.9	0	0.064721	0.746705	0
ENST00000252951.2	1.26337	3.03443	7.61826	1.48166
ENST00000252971.10	0.048057	0	0	0
ENST00000252979.5	0	0	0.375812	0.179156
ENST00000252984.11	0.333961	0	0	3.68682
ENST00000252996.8	0.089657	0	0	0
ENST00000252999.7	0	0.027634	1e-06	0.099851
ENST00000253003.6	1.35167	0	9.8847	5.1049
ENST00000253008.2	0	0	0	1.41867
ENST00000253023.7	0.588315	0.837687	2.97822	1.41763
ENST00000253024.9	1.05925	1.54694	15.4746	0
ENST00000253031.6	0	0.256964	0	1.10593
ENST00000253039.8	0.559675	0.827225	6.46867	4.75379
ENST00000253047.6	0.812954	0.217129	5.64785	0.897476
ENST00000253048.9	0	0.090417	0	0.560591
ENST00000253054.12	1.64687	5.94405	0	0
ENST00000253063.3	0	0.080409	0	0.49854
ENST00000253083.8	0.0776	0	0.333754	0.63082
ENST00000253108.8	1.40024	0	20.0041	7.86498
ENST00000253115.6	0	0.061197	0	0.18503
ENST00000253122.9	1.4831	0.815631	8.82418	5.15372
ENST00000253233.5	0.100864	0	0	0
ENST00000253237.9	0.0652	0.173876	1.01529	0.485284
ENST00000253247.8	0	0	0	2.42534
ENST00000253251.12	0.108668	0.23219	1.10191	0.839764
ENST00000253270.11	0	0	0	0.359217
ENST00000253320.8	0	0.018935	0	0
ENST00000253329.2	0.093584	0	0.541797	0
ENST00000253452.6	8.36685	5.87944	72.8768	47.7658
ENST00000253458.11	0.151876	0.165001	0.693257	0.655329
ENST00000253462.7	0.158876	0.135551	2.70857	1.1304
ENST00000253692.11	0.059707	0	0.63375	0
ENST00000253693.6	0.095359	0	0.552071	0.156275
ENST00000253788.10	15.9533	21.5751	155.917	118.542
ENST00000253794.6	0	0	15.5878	0
ENST00000253814.5	0.382101	0.147199	0.822391	1.63762
ENST00000253815.3	0	0	10.9148	12.3341
ENST00000253861.4	0	0.260067	0	0.418717
ENST00000253952.9	0	0	1.96151	0.935086
ENST00000254101.3	0	0	0.221525	0.105605
ENST00000254190.3	0.022801	0	0	0
ENST00000254193.10	1.24453	0	0	0
ENST00000254235.7	0	0.027984	0.262386	0.62198
ENST00000254286.8	0.241042	0	0	0
ENST00000254299.8	0.12521	0	0	2.17932
ENST00000254301.13	17.1446	17.3597	191.211	105.175
ENST00000254321.9	0	0.144753	0	0.598317
ENST00000254322.2	0.138366	0	0	1.32323
ENST00000254325.8	0	0.095975	1.10954	0
ENST00000254337.10	0	0.244838	0	0.76141
ENST00000254351.8	0.066121	0	0	0.364977
ENST00000254436.7	0.38078	0.363219	2.51943	1.50132
ENST00000254442.7	2e-06	0.025416	2.8e-05	1.3e-05
ENST00000254480.9	0.032953	0.042127	0.372367	0.186306
ENST00000254508.6	0.505343	0.441957	4.8013	2.62102
ENST00000254521.7	0	0.47428	0	3.28941
ENST00000254528.3	0.157753	0.140445	1.01477	0.580513
ENST00000254579.10	0	0	0	8e-06
ENST00000254630.11	0.583496	2.33638	18.1775	3.35878
ENST00000254654.7	0.211669	0	0	0
ENST00000254691.9	0	0.032839	0	0.407227
ENST00000254719.9	0.386586	0.487092	8.30604	4.4545
ENST00000254730.10	0.070188	0	0	0.129142
ENST00000254759.7	0.47358	0.421623	0	1.62952
ENST00000254803.3	0.453886	0.740831	3.50365	4.17563
ENST00000254806.7	0.521697	0.57583	0	0
ENST00000254810.8	0	0.14934	1.22295	0.901211
ENST00000254821.10	0.295366	0	0	0.310678
ENST00000254878.7	0.118788	0	0	0
ENST00000254928.9	0.489316	0	5.03619	1.433
ENST00000254942.7	0	0	0.481003	0
ENST00000254950.12	0	0	0.587768	0.180336
ENST00000254998.2	0.188451	0.125832	2.18204	0.52011
ENST00000255078.7	0	0	0	0.178285
ENST00000255082.7	0	0	0	0.447679
ENST00000255174.2	0.267226	0.267647	3.86772	0.737524
ENST00000255175.5	0.396937	1.13567	9.84684	5.99195
ENST00000255194.10	0	0.057566	0	0
ENST00000255304.8	0.108938	0	0	0.450991
ENST00000255305.10	0	0	3e-06	2e-06
ENST00000255320.6	12.312	8.80172	140.488	84.8311
ENST00000255390.9	0	0.036374	1e-06	0.067428
ENST00000255476.2	0.090622	0.12102	0.52465	0.25011
ENST00000255495.7	0.070823	0	1.23007	0
ENST00000255557.8	0	0	0	0.547912
ENST00000255608.8	0	0.210168	1.82226	0
ENST00000255688.7	4.29511	3.63269	38.1282	15.8056
ENST00000255695.1	0.144576	0	1.67402	1.59607
ENST00000255759.10	0	0	0.304666	0
ENST00000255764.3	0.370801	0.24759	5.36681	0
ENST00000255784.5	0.083064	0.110927	0	0.917002
ENST00000255882.10	0.185271	0.115027	2.13044	1.18728
ENST00000255945.3	0	0.284055	0	1.13004
ENST00000255977.6	3.55793	1.68014	6.06653	14.6033
ENST00000256015.4	0.557092	0.477657	4.61482	3.29105
ENST00000256078.8	0	0.420577	0	0
ENST00000256079.8	0	0.135509	0	0.727383
ENST00000256108.9	0	0	0.665768	0.266891
ENST00000256117.9	0	0	0.294369	0
ENST00000256194.8	0	0	0	1.46281
ENST00000256257.1	0	0.149712	0.649036	0.928222
ENST00000256319.6	0.118759	0.052865	1.83345	0.43702
ENST00000256366.5	0.022394	0	0	0
ENST00000256383.8	0.097275	0	0	0
ENST00000256429.7	0.124942	0.066704	1.38815	0.381119
ENST00000256433.5	0.041072	0.042924	0.346241	0
ENST00000256441.4	0.103689	0	0	0.297478
ENST00000256442.9	0	0	0	0.626983
ENST00000256447.5	0.365473	0.179813	2.11311	2.3363
ENST00000256458.4	0	0.119566	0.345564	0
ENST00000256474.2	0.492305	0.519757	9.65681	0
ENST00000256495.3	0.081264	0.079942	0.52762	1.32172
ENST00000256497.8	0.072214	0	0	0.396713
ENST00000256545.8	1.09857	1.22256	3.57266	5.05328
ENST00000256637.7	0.015861	0	0	0
ENST00000256646.6	0.202135	0.181769	1.83127	1.67779
ENST00000256652.8	0.126715	0.08461	2.20082	1.04917
ENST00000256682.8	0.029725	0.039329	0	0.469726
ENST00000256722.9	0	0	0.672726	0
ENST00000256854.9	0	0	2.43172	0.88451
ENST00000256876.10	0.105509	0	0	0
ENST00000256906.4	0	0	0	0.322655
ENST00000256935.12	0.165991	0.612528	0	0
ENST00000257013.8	0.164962	0.477986	0	0
ENST00000257017.4	0.16775	0.224019	0.971178	0
ENST00000257075.9	0	0.034824	0	0
ENST00000257181.9	0.088568	0.041799	0.781285	0.613222
ENST00000257189.4	0.233074	0.250473	1.30303	0
ENST00000257190.9	0	0	2.92257	0
ENST00000257192.4	0	0	0	0.113437
ENST00000257198.5	0.024669	0	0.285628	0
ENST00000257245.8	0	0	7.33381	2.21895
ENST00000257262.12	2.37022	0	35.3451	24.0235
ENST00000257287.4	0.041895	0	0	0
ENST00000257347.8	0	0	1.93553	0
ENST00000257359.6	0	0	0	2.14393
ENST00000257408.4	0	0	0	0.094549
ENST00000257430.8	0	0	7e-06	3e-06
ENST00000257468.11	0.953627	0.681687	1.81007	2.68053
ENST00000257497.10	14.2898	13.8727	198.256	112.793
ENST00000257527.8	0.055711	0.037304	0	0.705518
ENST00000257570.9	0	0	0.573964	1.05468
ENST00000257572.5	0	0	0.207218	0.098785
ENST00000257575.8	0.320638	0.196984	3.47916	3.24144
ENST00000257600.3	0	0	0.348388	0
ENST00000257604.9	0	0	2.63948	0
ENST00000257637.7	0.299079	0.3994	0	2.20116
ENST00000257659.12	0	0	0	0.873336
ENST00000257663.3	0.311114	0.553963	2.40157	0.572435
ENST00000257700.6	0	0.093424	0	0
ENST00000257745.8	0	0.069347	0.892728	0
ENST00000257749.8	0	0	1e-06	1e-06
ENST00000257787.5	0.568122	0.590091	5.84729	2.78751
ENST00000257829.7	0	0.207893	0	0
ENST00000257836.3	0	0	0	0.113053
ENST00000257848.7	0	0	1.6366	0
ENST00000257897.7	0.038471	0	0.670781	0.424706
ENST00000257915.9	0	0	1.01812	0
ENST00000257966.12	0	0	0	4.4253
ENST00000258052.7	0	0	0	0.704208
ENST00000258083.2	0	0	1.13243	0
ENST00000258091.9	0.582071	0.879238	28.4637	2.24617
ENST00000258111.4	0	0	0	0.234952
ENST00000258145.7	0	0	0.330072	0
ENST00000258149.9	0.018066	0.027809	0.484328	0.129214
ENST00000258157.9	0.052999	0	1.22733	0
ENST00000258201.8	0.078073	0.104261	1.50666	0
ENST00000258229.13	0.072156	0.018382	0.181735	0.07789
ENST00000258243.6	0.036921	0.049305	0.854998	0.407593
ENST00000258301.5	0	0	0	0.236002
ENST00000258341.4	0.018827	0	0.911128	0
ENST00000258349.8	0.013547	0	0	3e-06
ENST00000258362.7	0	0	0.402963	0
ENST00000258383.3	0.969272	0.720732	9.72082	3.82847
ENST00000258390.11	0.32788	0.276425	0	0
ENST00000258415.8	0	0	0.528834	0
ENST00000258418.9	0.16026	0.181275	3.08427	0.900822
ENST00000258424.2	7.49393	9.87104	84.6022	60.8155
ENST00000258449.2	0.036842	0	0	0.406719
ENST00000258455.7	0.280306	0.37433	0	3.86812
ENST00000258457.6	0	0	0.258397	0.242527
ENST00000258484.10	0	0.076055	0.329718	0.628729
ENST00000258526.8	0.017931	0.02169	0.978744	0.332288
ENST00000258538.7	0	0	0	0.12942
ENST00000258607.9	0	0.287991	0	1.70054
ENST00000258646.3	0.030657	0	0.315178	0.450752
ENST00000258648.6	0.078832	0.114299	0.887711	0
ENST00000258651.4	0	0	2.32948	0
ENST00000258662.2	0.049822	0.066535	0	0.639142
ENST00000258672.9	0	0	0.565945	0
ENST00000258711.7	0.018179	0.026188	0.087002	0.136426
ENST00000258739.8	0.36637	0.250002	3.17257	2.76617
ENST00000258774.9	0	0	0.821458	0
ENST00000258781.10	1.10544	0	1.42984	0
ENST00000258787.11	1.17234	1.67343	14.0074	8.08338
ENST00000258821.7	0	0.144905	0.504221	0.212716
ENST00000258873.8	0	0	0	0.151092
ENST00000258886.12	0.054834	0	0	0.483308
ENST00000258955.6	0.123749	0	0	0
ENST00000258960.6	0	0.167925	0	0
ENST00000258962.4	0	1.66973	12.2305	9.92506
ENST00000258963.7	0	0.035126	0	0.448311
ENST00000258969.4	0.060282	0	0	0.332748
ENST00000258975.6	0.214755	0.095597	0.828873	0.790278
ENST00000259008.6	0.068505	0	0	0.507026
ENST00000259021.8	0	0	1e-06	0.065036
ENST00000259030.2	0.13519	0.270806	1.56535	1.11934
ENST00000259037.7	0.63526	0	0	0
ENST00000259038.6	0	0	0	1.08131
ENST00000259053.5	0.02777	0.105828	0	0.434593
ENST00000259056.4	0	0	0.225155	0.092641
ENST00000259089.8	0.124385	0.172906	2.99393	0.500032
ENST00000259154.8	0	0	0	0.145823
ENST00000259199.8	0.223789	0	0	0
ENST00000259229.6	0.254997	0.340532	2.21443	0
ENST00000259235.7	0.153245	0.068216	0.295733	0.422943
ENST00000259253.10	0	1e-06	4e-06	0.50624
ENST00000259254.8	16.4196	15.9237	187.964	84.4195
ENST00000259318.7	0.194178	0.224056	0	2.64391
ENST00000259339.6	0.037621	0.050241	0	0.267793
ENST00000259365.8	3.26604	2.86618	10.1525	4.45805
ENST00000259455.3	0.324079	0.057931	1.77826	1.15035
ENST00000259456.7	0	0	0	27.5897
ENST00000259457.7	2.92664	4.34258	28.8668	18.5478
ENST00000259460.12	0	0	1.38291	0.443146
ENST00000259467.8	0.04172	0.049447	0.522143	0.902813
ENST00000259470.5	0	0	0.786801	0
ENST00000259477.6	0.238617	0.424876	0	0.878086
ENST00000259512.8	0.067149	0.15318	1.07505	0
ENST00000259569.5	0.204034	0	1.83749	1.25137
ENST00000259608.7	0	0	4.50218	3.31364
ENST00000259632.11	1.1509	1.41371	0	13.1476
ENST00000259727.4	4.30089	2.50122	20.0804	13.4017
ENST00000259806.2	0	0	0	1.54219
ENST00000259874.5	0.056561	0	0	0.312208
ENST00000259939.3	0	0.030752	0	0.12715
ENST00000259941.6	0.017307	0.023113	0.1002	0
ENST00000259963.3	0.022178	0.088851	0.513588	0.856928
ENST00000259989.6	0.181005	0.241721	1.04792	0.999122
ENST00000260008.3	0.031959	0.021339	0.185022	0
ENST00000260045.7	0	0	1.09469	1.07917
ENST00000260056.6	0	0	0	1.36154
ENST00000260058.9	0.147051	0	0	0
ENST00000260102.8	0.645419	0.738783	3.11593	5.08945
ENST00000260118.6	0.457274	0	0	3.60583
ENST00000260129.5	0.054933	0	0	0.606448
ENST00000260184.11	0.076641	0	1.59735	0.898781
ENST00000260197.11	0.040703	1e-06	1.2024	0.279381
ENST00000260210.4	0.332985	0.127051	0	0
ENST00000260270.2	0.162233	0.08666	1.12708	1.12099
ENST00000260323.15	0.026299	1e-06	1e-06	0.048392
ENST00000260324.11	0	0	4.23255	0
ENST00000260327.8	0	0	0	0.373455
ENST00000260356.5	0.093155	0.124402	0.382439	0.48646
ENST00000260361.8	0.43191	0	0	1.34014
ENST00000260372.7	0	0	0	1.05915
ENST00000260408.7	0	0.032509	0.143457	0.219853
ENST00000260443.8	0.083736	0.233909	3.36629	0
ENST00000260508.8	0	0	0	2.06675
ENST00000260563.4	0	0.54881	3.1723	1.10713
ENST00000260570.7	0	0.025559	0	0
ENST00000260585.11	0.029427	0.018015	0.162288	0.463937
ENST00000260604.8	0.141156	0	0	2.15222
ENST00000260641.9	0.153487	0.462379	0	3.48345
ENST00000260665.11	0.095986	0.384309	4.08294	4.32354
ENST00000260731.4	0.704145	0.547489	7.90613	6.15806
ENST00000260743.9	0	0	0.795605	0
ENST00000260746.5	0.054041	0	1.25146	0.596592
ENST00000260753.8	0.131378	0.197378	1.52121	1.34673
ENST00000260762.10	0.029161	0	0	0
ENST00000260803.8	0	0.15661	3.18117	0.863102
ENST00000260810.9	0	0.102943	0.536918	0.381647
ENST00000260818.10	0.13621	0.082206	0.695674	0.369432
ENST00000260908.11	0.035875	0	0	0
ENST00000260956.8	0.925606	0.692688	20.3506	8.48289
ENST00000260983.8	1e-06	0	0	0
ENST00000261015.4	0.015297	0.022156	0.227889	0
ENST00000261034.6	0.072991	0	0	0
ENST00000261037.7	0	0	0	0.100247
ENST00000261070.6	1.57378	0	21.8671	0
ENST00000261167.6	0.13396	0.109191	1.03407	2.09509
ENST00000261168.8	0	0	1e-06	1e-06
ENST00000261173.6	0.084888	0	0.226941	0.429925
ENST00000261182.12	0	0	0.723811	0.940769
ENST00000261183.7	0	0.229115	0.528973	0
ENST00000261187.8	0	0.046871	0.111105	0.166835
ENST00000261192.11	0.018935	0.071363	0.371253	0.531709
ENST00000261203.7	0.107378	0	0	0
ENST00000261210.9	0.816588	0	0	0
ENST00000261211.7	0.111794	0	0	0.153493
ENST00000261220.13	0.285231	0	0	0
ENST00000261247.13	0.425208	0	0	0
ENST00000261249.6	0	0.051914	0.431088	9.54141
ENST00000261254.7	0.202241	0.257966	2.44072	2.03096
ENST00000261263.4	0.014952	0.010196	0.087533	0.253787
ENST00000261267.6	6.25734	4.78979	49.3747	31.2297
ENST00000261292.8	0	0	0.124513	0
ENST00000261296.6	0.054948	0	0	0
ENST00000261304.6	0	0	0.475498	0
ENST00000261308.9	0	0	2.79265	0
ENST00000261313.2	0.547761	1.46425	3.90733	4.43465
ENST00000261318.4	0	0	0	0.076236
ENST00000261326.5	0	0	0.194679	0
ENST00000261339.10	1.80916	0	13.5627	25.7048
ENST00000261340.11	2.2583	1.66022	14.4838	19.2387
ENST00000261353.8	0	0	0.778157	0
ENST00000261366.9	0.129183	0	0	4.49402
ENST00000261381.6	0.011269	0	0.484112	0.173089
ENST00000261396.5	0.139355	0.219731	1.84407	0.891949
ENST00000261401.7	0.075025	0.054668	0	0
ENST00000261406.7	1.10961	0	0	0
ENST00000261407.8	0.064952	0.114646	0	0.919523
ENST00000261415.12	0	0.158824	0	0
ENST00000261416.11	0.149894	0.220609	1.13962	2.10789
ENST00000261427.9	0.02236	0.070482	0.293202	0.355831
ENST00000261435.10	0	0	0.291597	0.761399
ENST00000261438.9	0.149124	0.167099	1.84753	1.0786
ENST00000261439.8	0	0.072823	0	0
ENST00000261461.6	0.199579	0.044421	1.15545	0.370494
ENST00000261479.8	0.443322	0	0	0
ENST00000261482.8	0.499479	0	0	0
ENST00000261483.4	0.089307	0.298159	2.8437	2.56303
ENST00000261488.10	0	0.048886	0	0.208951
ENST00000261489.6	0.128779	0	1.23937	0.35407
ENST00000261491.9	0.005982	0	0.13853	0.033182
ENST00000261497.8	0	0	0.813747	0.692557
ENST00000261507.10	0	0	2.13139	0.304393
ENST00000261517.9	3e-06	4e-06	3.5e-05	1.7e-05
ENST00000261530.11	4e-06	0	8e-06	0
ENST00000261531.11	0	0.852949	0	0
ENST00000261537.6	0.043236	0.086515	0.338466	0.30427
ENST00000261558.7	0.01109	0	2e-06	0.060419
ENST00000261560.9	0.097482	0.157052	0.420095	0.36026
ENST00000261574.9	0.032114	0.236764	0	0.371961
ENST00000261588.8	0.015649	0	0	0
ENST00000261590.12	0	0.023726	0	0
ENST00000261593.7	0	0	0	0.451681
ENST00000261596.8	0.236899	0.024836	1.5401	1.15887
ENST00000261597.8	0.673428	0.64237	7.79752	6.10686
ENST00000261601.7	0	0	1.45271	0
ENST00000261609.11	0.048927	0.024565	5.1e-05	0.183923
ENST00000261622.4	0.685091	0.310434	2.83224	2.39818
ENST00000261623.7	7.11377	9.14148	82.3693	38.7129
ENST00000261636.12	0.081754	0	0	0
ENST00000261637.4	0.09167	0.076512	2.12286	1.0121
ENST00000261647.9	0.111547	0	0	0
ENST00000261652.6	0	0.222723	3.59511	0
ENST00000261667.7	0.162335	0.123878	2.95374	1.50962
ENST00000261692.6	0	0	0	0.379442
ENST00000261699.8	0.152942	0	0	1.26632
ENST00000261700.7	0	0	0	0.092491
ENST00000261708.8	0	0	0.696681	0
ENST00000261714.10	0.128041	0	2.3305	0
ENST00000261716.7	0.067008	0.038778	0.182149	0.347833
ENST00000261721.8	0.220801	0.068277	0	0.69645
ENST00000261726.10	0.015129	0	0	0
ENST00000261731.3	0	0	0.382093	0
ENST00000261733.6	0.01627	0	0	0
ENST00000261735.3	1.84317	1.39323	0	3.21014
ENST00000261739.8	0.051385	0	0	0.602371
ENST00000261741.9	0	0.099155	0	0
ENST00000261758.5	0	0.15875	0	0.391412
ENST00000261772.12	0.544516	0.718642	5.19248	4.62065
ENST00000261778.1	0	0.115028	0.997349	0.416587
ENST00000261783.3	0	0	0	0.691534
ENST00000261797.6	0	0	0.149179	0
ENST00000261798.9	0	0	0	0.276216
ENST00000261813.8	0	0	2.37965	3.22329
ENST00000261819.7	0	0	1.40846	1.84217
ENST00000261822.4	0	0.081978	0	0
ENST00000261837.11	0	0.018313	0	0
ENST00000261844.11	0	0	0	0.385077
ENST00000261845.6	0.019391	0.051791	1.34715	0
ENST00000261847.7	0.137443	0	1.06096	0.193896
ENST00000261854.9	0	0.029491	0	0
ENST00000261866.11	0	0	1.38698	0
ENST00000261867.4	0	0.038625	0	0
ENST00000261875.9	0	0	1.56469	0
ENST00000261884.7	0.239447	0	4.14437	2.54018
ENST00000261888.10	0	0.101895	0	0
ENST00000261890.6	0	0.066431	0	0.278395
ENST00000261893.8	0.053053	0.141698	0	0
ENST00000261921.7	0	0	0	0.23258
ENST00000261942.6	0	0.110885	1.90904	1.04879
ENST00000261947.4	0	0.079251	0	0
ENST00000261951.8	0.067078	0	0.194172	0.277696
ENST00000261965.7	0	0	0	0.588114
ENST00000261973.11	0	0.030829	0	0.272319
ENST00000261978.8	0	0	1e-06	0
ENST00000262027.9	0	0	6.22449	7.32024
ENST00000262030.7	7.74097	6.14128	62.7638	48.0553
ENST00000262033.10	0	0	3.28082	0
ENST00000262039.8	0	0	1e-06	0
ENST00000262056.13	0.038174	0	3.15042	0.699579
ENST00000262065.7	0	0	0	0.210273
ENST00000262077.2	0	0	1.09342	0
ENST00000262093.9	0.055134	0.23284	2.32644	0.670853
ENST00000262094.9	0	0	0.164586	0.078461
ENST00000262096.12	0.054319	0.073837	0.617249	0.310393
ENST00000262109.7	0.115563	0	0	1.27578
ENST00000262124.15	0	0	0	0.492641
ENST00000262126.8	1e-06	1e-06	1.3e-05	0.311507
ENST00000262133.10	0	0.132654	3.42631	2.05172
ENST00000262134.9	0	0.029552	0	0
ENST00000262160.10	0.014622	0.008206	0.001663	0.023947
ENST00000262173.7	0	0.045719	0.844961	0
ENST00000262177.8	0.062813	0	0.691457	0
ENST00000262189.10	1.3e-05	1.3e-05	0.000152	7.5e-05
ENST00000262193.6	9.97573	7.96253	82.3157	56.9633
ENST00000262197.7	0.086624	0	0	1.43445
ENST00000262198.8	0.038435	0.025664	2.00265	0.117652
ENST00000262210.9	0.118813	0	0	0
ENST00000262213.6	0.575406	0.606346	8.66167	3.89869
ENST00000262215.7	0	0.08617	1.4928	1.34422
ENST00000262225.7	0.35593	0.47436	4.71584	1.92145
ENST00000262238.8	0.057735	0.130656	0.642938	0.529928
ENST00000262241.6	0.019067	0.048091	0	0.397555
ENST00000262244.5	0.01955	0.021426	0.185771	0
ENST00000262259.6	0	0	0	0.100466
ENST00000262265.9	0	0	3.05906	4.40327
ENST00000262288.7	0	0.575619	4.36751	5.65133
ENST00000262293.8	0.351469	0.198324	0	2.33937
ENST00000262302.13	0	0	0	1.64451
ENST00000262304.8	4e-06	1e-06	1.7e-05	3.1e-05
ENST00000262306.11	9.30091	8.89949	48.3791	39.1406
ENST00000262318.12	0	0.136761	0	0.462852
ENST00000262319.10	0.063878	0	0	0.519635
ENST00000262327.9	0	0	1.18332	0
ENST00000262346.6	0	0.083481	0	0
ENST00000262367.9	0.028952	0.075954	1.96985	0.599481
ENST00000262370.11	0	0	0	0.239941
ENST00000262374.9	0	0	0	0.686499
ENST00000262384.3	0.072829	0.038903	0.358629	0.09969
ENST00000262395.9	0.035619	0	0	0
ENST00000262407.5	0.062399	0	0	0
ENST00000262415.7	0	0	1.72701	0
ENST00000262418.11	9.08872	8.88806	83.5008	57.5994
ENST00000262419.10	0	0	0.679714	0
ENST00000262426.5	0	0	0	0.171545
ENST00000262428.4	0.945503	0.758875	9.74604	3.48291
ENST00000262430.5	0.007924	0.010582	0	0.044254
ENST00000262455.6	0.2991	0.51355	5.68959	3.77368
ENST00000262456.6	0.035074	0	0	0
ENST00000262460.4	0.128053	0	1.11203	0.531835
ENST00000262461.6	0.150361	0	0	0.829876
ENST00000262464.8	0	0	0	2e-06
ENST00000262483.12	0	0.019507	0	0
ENST00000262498.7	0	0.160224	0	2.00705
ENST00000262518.8	0.087916	0.117406	1.1e-05	5e-06
ENST00000262519.13	0	0.021436	0.185858	0.265805
ENST00000262525.5	0	0.022724	0	0
ENST00000262544.6	0	0	4.74912	3.08619
ENST00000262554.6	0.44564	0.516686	4.47992	3.96622
ENST00000262570.9	0	0.175475	0	0
ENST00000262577.5	0.15854	0.211719	2.56999	0.301264
ENST00000262605.8	0.045495	0	0.193042	0
ENST00000262607.3	0.407952	0.674312	6.80314	5.44155
ENST00000262613.9	1.38152	0.394352	10.2463	7.91907
ENST00000262629.8	1.91248	0	0	0
ENST00000262630.7	0	0	2.47246	1.18354
ENST00000262633.8	0	0	7.22942	0
ENST00000262640.11	0.083569	0	0	1.15322
ENST00000262644.8	0.097386	0.130055	0.930712	0.561581
ENST00000262646.11	0.059059	0	0	0
ENST00000262662.5	0	0	0	0.791652
ENST00000262676.9	0	0.022043	0	0
ENST00000262715.9	0	1e-06	4e-06	2e-06
ENST00000262719.9	0	0.021641	0	0.089451
ENST00000262735.9	0.011138	0	0.120121	0
ENST00000262768.11	0.142428	0	0	0.471541
ENST00000262803.9	0	0	0	0.582839
ENST00000262811.10	0.135606	0	1.42407	0.678883
ENST00000262812.8	0.773162	0	7.69308	7.12176
ENST00000262815.12	0	0	0	0.258973
ENST00000262825.9	0	0	0.588259	0
ENST00000262844.9	0.075311	0	0.43601	0
ENST00000262848.5	0	0	0.210063	0.098194
ENST00000262850.7	0.066763	0	0	0
ENST00000262854.10	5e-06	7e-06	3.40901	3.1e-05
ENST00000262866.8	0.039456	0	0	0.257323
ENST00000262879.10	0	0	1e-06	0
ENST00000262888.7	0	0	2.15935	0
ENST00000262890.7	0	0.565338	0	0
ENST00000262891.8	0.058173	0.077686	0	0
ENST00000262903.8	0	0	0	0.250275
ENST00000262932.4	0.48987	0	0	2.31772
ENST00000262940.11	0	0	0	0.207516
ENST00000262941.7	0	0	0	0.701171
ENST00000262947.7	1.98035	2.08786	23.0213	11.5066
ENST00000262948.9	0.665049	0	1.38276	0
ENST00000262953.10	0	0	0	0.212631
ENST00000262960.13	0.096655	0	0	0
ENST00000262962.11	0.44021	0.293936	5.94665	1.61993
ENST00000262971.2	0.131735	0	0	0.545368
ENST00000262982.2	0.643535	0	7.11269	0
ENST00000262990.8	0	0.114558	0	0
ENST00000262992.8	0	0	0	0.183172
ENST00000262995.8	0	0.03966	0	0.214663
ENST00000263026.9	0.020971	0.056483	0.324488	0
ENST00000263035.8	0.025603	0	0.54371	0
ENST00000263036.9	0	1.04854	18.1455	14.6294
ENST00000263062.8	0.178715	0.061255	0	0.827863
ENST00000263063.8	0	0	0.724121	0.246956
ENST00000263070.11	0.121111	0.254156	1.00166	0
ENST00000263073.10	0.069521	0	0	1.05469
ENST00000263080.2	0.019683	0	0	0
ENST00000263087.8	0	0.035952	1.5586	0.891616
ENST00000263095.10	0.02737	0	7e-06	2e-06
ENST00000263097.8	0	0	1.05626	0
ENST00000263102.6	0.035656	0.047617	0	0.295227
ENST00000263150.8	0.093014	0.217374	0	0.256711
ENST00000263168.3	0.279239	0.190791	1.93914	1.58078
ENST00000263181.6	0.058255	0	0.337264	0
ENST00000263187.3	0	0	0.36873	0
ENST00000263196.11	0	0	1.26776	0
ENST00000263201.5	0.317666	0	0	1.92485
ENST00000263205.11	0	0	0	0.901642
ENST00000263212.9	0	0	0	0.175522
ENST00000263228.3	0.127388	0.204142	1.77001	0.465583
ENST00000263233.8	0	0	0	0.70808
ENST00000263238.6	0.122088	0.160641	0.790941	1.00461
ENST00000263239.6	0.352777	0.196171	3.69893	1.93792
ENST00000263253.8	0.18453	0.216039	2.15153	1.57424
ENST00000263256.6	0.431138	0.2942	1.03081	1.47029
ENST00000263270.10	1.47976	0	14.6776	6.07709
ENST00000263275.4	0.017317	0	0	0
ENST00000263276.6	0.110546	0	1.78199	0.509704
ENST00000263277.7	0	0	0.335652	3.33926
ENST00000263346.12	0.187083	0	0	3.22125
ENST00000263360.10	0	0	5.98421	2.85278
ENST00000263368.8	10.8318	21.2035	29.7545	58.5494
ENST00000263370.2	0.061432	0	0	0.169547
ENST00000263372.4	0.03622	0	0.209671	0.213824
ENST00000263377.6	0.068414	0.029846	0.236461	0.639129
ENST00000263379.3	0.035146	0.140805	2.03474	0.776021
ENST00000263382.7	0	0.271251	0	0.765508
ENST00000263384.11	0.722662	0	0	0
ENST00000263390.7	0.032777	0	0.759032	0
ENST00000263398.10	0.073986	0	1.07329	0.714915
ENST00000263433.7	0.106821	0	0	0
ENST00000263461.10	0.097574	0	0	0.664503
ENST00000263464.7	0	0.079911	0.879108	0.528806
ENST00000263525.6	0.019969	0	0	0
ENST00000263549.7	0	0	0	1.05734
ENST00000263559.10	0	0	0	0.311177
ENST00000263563.6	0.022776	0	0	0
ENST00000263574.9	0	0.16372	0	0
ENST00000263579.4	0.568731	0.569627	4.11579	4.70897
ENST00000263593.7	0	0.074357	0	0
ENST00000263610.6	0.98089	1.54808	7.22755	7.13711
ENST00000263620.7	0.060558	0	0	0
ENST00000263621.1	1.7354	1.3905	14.7355	3.83165
ENST00000263630.13	0	0	2e-06	1e-06
ENST00000263634.7	0	0	2.10168	1.59262
ENST00000263636.4	0.150332	0.205392	0.521918	0.19682
ENST00000263642.2	0.10599	0.11581	5.35537	1.91475
ENST00000263645.9	0	0.138888	0	2.05475
ENST00000263646.11	0	0.131682	0	0
ENST00000263657.6	0.207392	0	3.02758	1.49818
ENST00000263663.9	0.437161	0	2.51026	2.17176
ENST00000263672.10	0.04986	0.146208	0	0
ENST00000263681.6	0.095115	0	0	0
ENST00000263694.8	0.632087	0.79014	9.5513	3.62883
ENST00000263697.5	0.558636	0	0	0
ENST00000263707.5	0.011128	0	0.644272	25.8608
ENST00000263708.6	0	0	0	0.071059
ENST00000263733.4	0.070753	0.023117	0.228072	0.095604
ENST00000263736.4	0.056453	0	0.980486	0
ENST00000263754.4	0.798217	0.286553	0.868549	2.36862
ENST00000263773.9	0.159588	0.092301	0.863767	1.87598
ENST00000263774.8	0.65848	0.444542	8.99359	2.69334
ENST00000263776.8	0	0	0	0.243892
ENST00000263795.10	0	0	1.20899	0.595821
ENST00000263805.8	0	1e-06	0.188272	0.363162
ENST00000263812.8	0.515706	0.458866	0	0
ENST00000263847.5	0.122377	0	0.708495	0
ENST00000263856.8	0	0.096036	0	0
ENST00000263857.10	1e-06	0.018748	1.5e-05	7e-06
ENST00000263863.8	4.55838	6.23429	0	10.0719
ENST00000263864.9	1.66039	1.66301	19.2254	12.9839
ENST00000263904.4	0.019724	0	0.238655	0
ENST00000263918.8	0.03606	0	0.417531	0.199044
ENST00000263921.7	0	0.118163	2.04906	0
ENST00000263932.6	0	0	0	0.622368
ENST00000263955.8	0.710854	0.647261	5.61089	3.10824
ENST00000263956.7	0	0.110808	1.68386	0.544868
ENST00000263960.6	0	0.19988	0	0.87301
ENST00000263966.7	0.012429	0	0	0
ENST00000263967.3	0	0	1e-06	0
ENST00000264001.8	0	0	5.98579	3.47888
ENST00000264028.4	0.085204	0.05445	1.09698	1.51256
ENST00000264033.5	0.012057	1e-06	0.10668	0.457219
ENST00000264037.2	0	0	0	0.088368
ENST00000264065.11	6e-06	1.4e-05	0.069441	2.4e-05
ENST00000264071.6	0	0	0	0.493413
ENST00000264079.10	0.70295	0.185449	6.97659	4.99942
ENST00000264093.8	0.188278	0	0	0
ENST00000264108.4	2.30993	3.15443	31.3903	22.7486
ENST00000264126.8	0.034361	0	0	0
ENST00000264128.13	0.187935	0.083658	1.45072	1.21027
ENST00000264144.4	0.020141	0	0	0
ENST00000264156.2	1.73179	2.13683	15.7217	11.3341
ENST00000264158.12	0.084407	0	0	0.255916
ENST00000264159.10	0.051323	0	0	0.331294
ENST00000264161.8	0.438165	0.562743	11.2602	3.77287
ENST00000264167.8	0.090643	0.073361	0.225582	0
ENST00000264170.8	1e-06	0.030975	0.087491	0.134152
ENST00000264183.8	0.186819	0.07433	0	0
ENST00000264187.6	0.070665	0	0	0
ENST00000264192.7	0.356994	1.49899	19.2599	6.01951
ENST00000264193.2	0.102386	0	2.56133	1.01753
ENST00000264198.4	0.256744	0.114288	1.98186	1.18099
ENST00000264202.7	4.31538	4.06976	55.2912	42.0507
ENST00000264203.7	0	0	0	1.60026
ENST00000264205.10	0	0	4.41094	0
ENST00000264220.6	0.028219	0.075368	0	0.778812
ENST00000264221.6	0.447811	0.137559	1.18482	2.45518
ENST00000264228.8	0	0	0	0.175295
ENST00000264230.4	0	0.04066	1.4104	0.958577
ENST00000264233.5	0.012865	0.01574	0.545884	0.325291
ENST00000264235.12	0	0.045789	0.776867	0.079172
ENST00000264244.7	0.155264	0	5.76608	0
ENST00000264245.8	0.022349	0.0452	0.128508	0.122524
ENST00000264246.7	0	0	0.442722	0
ENST00000264254.10	0.709284	0.420978	6.38765	4.06324
ENST00000264255.7	0	0	0	1.23066
ENST00000264260.6	0	0	0.434977	0.207361
ENST00000264263.9	0.063339	0	0	0
ENST00000264265.3	0	0.126642	1.09805	0
ENST00000264266.12	0	0.791654	0	0
ENST00000264279.9	0.568261	0.352297	7.59448	4.92696
ENST00000264312.11	0.271724	0	0	0
ENST00000264313.10	0.019905	0	0.671586	0
ENST00000264316.8	0	0	1.24116	0
ENST00000264331.8	0	0.232238	0	0
ENST00000264345.7	0.130622	0.040118	1.76453	0
ENST00000264346.11	0	0	0	0.180484
ENST00000264350.7	0	0.118536	0	0.66209
ENST00000264380.8	0.015635	0.021982	0.846338	0.454696
ENST00000264389.6	0.491465	0	0	4.70318
ENST00000264400.6	0	0	3.18571	2.53114
ENST00000264409.4	0	0	0	0.219183
ENST00000264414.8	0.022107	0.082038	0	0
ENST00000264433.10	0.014948	0	0.173083	0.134102
ENST00000264441.9	0.079288	0.068874	0	0
ENST00000264447.8	0.159176	0.151719	3.68616	0.933402
ENST00000264449.14	0.088212	0.100973	0	0.158596
ENST00000264451.11	0	0	0	0.151624
ENST00000264452.9	0.135428	0	0	0.826916
ENST00000264474.3	0.713868	0.190665	4.95946	1.57618
ENST00000264501.8	7e-06	5e-06	4.8e-05	4e-05
ENST00000264515.10	0	0	0	0.781798
ENST00000264538.3	0.04463	0	0	0.517987
ENST00000264553.5	0.33946	0	1.31018	1.87376
ENST00000264572.11	0	0.083078	0	0
ENST00000264595.6	0.14882	0.132493	2.1997	0.695407
ENST00000264596.3	0.105966	0.057865	3.01029	0.478352
ENST00000264607.8	0	0	0.171368	0
ENST00000264639.8	0.328793	0.840572	4.07378	4.52836
ENST00000264645.11	0.041185	0	0	1.39222
ENST00000264657.9	0	0.192034	0	0
ENST00000264658.10	0	0.02658	0	0.072304
ENST00000264663.9	0	0	1.5738	0.867713
ENST00000264689.10	0	0	4.93599	0
ENST00000264705.8	0	0	0	1.10088
ENST00000264709.7	0	0	1e-06	0
ENST00000264710.4	0.117607	0	0.494391	0.649173
ENST00000264716.8	0.108037	0	0.536118	0
ENST00000264720.7	0.071044	0	0	0
ENST00000264819.6	0	0	0.174118	0
ENST00000264824.4	0.97746	0.93654	4.90176	3.11567
ENST00000264828.3	0.016775	0.022402	0	0
ENST00000264834.5	0.717069	0.783147	0.754474	2.15803
ENST00000264864.7	0.14655	0.274457	2.71963	0.503143
ENST00000264870.7	0.077896	0	0.601299	0.143325
ENST00000264874.7	0	0.210811	0	0
ENST00000264883.7	0	0.235517	0	0
ENST00000264888.5	0	0	0.440272	0
ENST00000264893.10	0.022848	0.225409	0	0
ENST00000264914.9	0.058349	0	0	0
ENST00000264926.6	0	0	0.271413	0.38849
ENST00000264930.9	0.024028	0.020439	0	0
ENST00000264932.10	0	1.10014	14.6606	0
ENST00000264934.5	0.141467	0	0	0
ENST00000264951.8	0.038678	0	0.869294	0.43858
ENST00000264972.9	0.718677	0.686013	7.43508	5.27791
ENST00000264977.7	0	0	0.176408	0
ENST00000264993.7	0.539446	0.296842	4.2465	1.4573
ENST00000265000.8	0	0.160893	0	0
ENST00000265016.8	0	0	0	0.784287
ENST00000265028.7	0.869895	0.727578	4.45034	6.38187
ENST00000265036.9	0	0	0	1.38219
ENST00000265038.9	0	0	0.600391	0
ENST00000265044.6	0.281388	0.226472	0.403199	0.418525
ENST00000265062.7	0.067996	0	0	1.75662
ENST00000265068.9	0.017452	0	0	0
ENST00000265069.12	0.214451	0.321567	2.02774	1.44999
ENST00000265070.6	0.268045	0.409093	2.2169	1.61807
ENST00000265073.8	0.102124	0.06094	0.5255	0.879573
ENST00000265077.7	0.058606	2e-06	1.7e-05	8e-06
ENST00000265081.6	0.101484	0.067763	1.17507	0.700221
ENST00000265085.9	0.054518	0	0.252503	0
ENST00000265093.4	0	0	0	6.43025
ENST00000265094.9	0	0	0	0.142711
ENST00000265097.8	0.792943	0	0	0
ENST00000265107.8	0.209411	0.186405	0	0
ENST00000265112.7	0	0.044243	0	0.246274
ENST00000265134.10	0.03658	0	0	0
ENST00000265138.3	0.074356	0.033099	0.86096	0.684059
ENST00000265148.7	0	0	1e-06	0
ENST00000265149.9	0.020958	0	1e-06	0.10231
ENST00000265165.5	0	0	0	0.885298
ENST00000265174.4	0.181341	0.254737	3.97565	0.617676
ENST00000265175.5	0.061371	0.191232	0.947472	0.451677
ENST00000265187.4	0	0.040334	1.04914	0
ENST00000265192.8	0.286866	0.17765	0	0
ENST00000265245.9	0.075327	0	2.0213	0.875917
ENST00000265260.7	0	0.231549	0	0
ENST00000265271.6	0.160515	0.192921	1.301	0.708813
ENST00000265277.9	0	0	4.56311	1.39842
ENST00000265295.8	0	0.081623	0	0
ENST00000265304.10	0	0.618428	0	0
ENST00000265339.6	0	0	0	0.783667
ENST00000265340.11	0	0	0	0.321146
ENST00000265343.9	0.054123	0.021165	1e-06	0.437701
ENST00000265344.8	0	0	0	0.687676
ENST00000265348.7	0.051659	0.026346	0.228436	0.217799
ENST00000265351.11	0.026141	0.12254	0.257359	1.01557
ENST00000265354.5	0.024702	0.065976	0.572048	0.137618
ENST00000265379.10	0	0	0	0.061948
ENST00000265382.7	0.07874	0.367093	1.36409	0.434636
ENST00000265388.9	0	0	0.289422	0
ENST00000265393.10	0.847719	0.79245	10.3064	10.3625
ENST00000265417.7	0	0	0	0.100904
ENST00000265421.8	0	0	0	1.31308
ENST00000265428.4	0	0.049895	0	0
ENST00000265447.8	0	0.351501	0	1.59511
ENST00000265462.8	3.4723	3.1989	31.6528	22.7611
ENST00000265465.7	0	0	0	1.29405
ENST00000265498.5	0	0	9.27651	0
ENST00000265523.8	0.692493	1.189	10.3092	2.73033
ENST00000265560.8	0	0	3.91084	0
ENST00000265563.12	0.052376	0	0.261669	0.099149
ENST00000265564.7	0.988142	1.01082	11.8008	8.22929
ENST00000265586.10	0.018139	0.048446	0.267794	0.216437
ENST00000265594.8	0	0	0	2.93998
ENST00000265616.9	0	0	0	0.400422
ENST00000265620.11	0	3.10127	0	13.142
ENST00000265631.9	0	0	0	0.36627
ENST00000265641.9	0.582119	0.837541	4.99871	0
ENST00000265643.3	0	0.174474	3.02555	2.1635
ENST00000265686.7	0.389285	0	4.50747	4.51246
ENST00000265689.8	0.041217	0	0	0
ENST00000265709.13	0	0	1e-06	0
ENST00000265713.6	0.226894	0.105613	2.11294	0.904819
ENST00000265717.4	0.138701	0.07409	0.3212	0.153122
ENST00000265724.7	0.106735	0	0	1.1094
ENST00000265732.9	0.060177	0	0	0.332166
ENST00000265734.8	0.074445	0.111877	0.862008	0.616832
ENST00000265741.7	0.021881	0	0	0
ENST00000265742.7	0	0.090985	0	0.376074
ENST00000265745.13	0.47609	0	0	0
ENST00000265748.6	0	0.202526	0	0
ENST00000265806.10	0.059107	0	0	0
ENST00000265827.7	0	0	1.14382	0
ENST00000265838.8	1.13081	1.27168	8.73952	8.54157
ENST00000265857.7	0	0.066793	0	0
ENST00000265866.11	0.091511	0	1.66366	0.48999
ENST00000265870.7	0.051066	0	0	0
ENST00000265896.9	0	0.187803	0.814173	0
ENST00000265970.11	0.012574	0.033584	0.291188	0.138814
ENST00000265978.8	0	0	1.38306	0
ENST00000265981.6	0.03046	0.034032	0.411615	0.281335
ENST00000265986.10	0.032241	0	0	0.770231
ENST00000265990.10	0.028551	0	0	0
ENST00000265997.4	0.042755	0	0.247527	0.236001
ENST00000266022.8	0.194851	0	0	0.906473
ENST00000266025.3	0	0.190489	0	0.262454
ENST00000266039.7	0	0	0	0.119597
ENST00000266069.4	0.495589	0.441218	5.19184	3.3869
ENST00000266070.8	0	0	1e-06	0.842627
ENST00000266079.4	0.854748	0.776192	7.9176	3.58574
ENST00000266087.11	0	0.26251	0	0
ENST00000266254.11	0	0	1.4772	0
ENST00000266397.6	0.049871	0	0	0
ENST00000266483.6	0.066526	0	0	0
ENST00000266508.13	0.057412	0	0	0.44014
ENST00000266517.8	0.073949	0.069217	0.646501	0.619385
ENST00000266529.7	0	0.147665	0	0
ENST00000266542.8	0.622711	0.254462	6.04634	2.50319
ENST00000266544.9	0	0	0.182328	0.177743
ENST00000266556.7	0	0	2.78873	0
ENST00000266557.3	1.65373	1.4723	12.7655	4.78151
ENST00000266589.10	0	0.192633	0	0
ENST00000266643.5	0.034908	0	0	0
ENST00000266646.2	0	0.057358	0	0
ENST00000266659.7	0.021547	0	0.533623	0.27589
ENST00000266673.9	0	0	0.375974	0.596777
ENST00000266679.8	0.61666	0.793272	0	3.42795
ENST00000266712.10	0.014369	0	0	0
ENST00000266732.8	0.477646	0.620627	0.834323	2.50598
ENST00000266735.9	0	0.667661	19.7133	11.4744
ENST00000266742.8	0	0	0	0.283297
ENST00000266771.9	0	0	1.30079	0
ENST00000266880.11	0.028342	0.080704	0.752272	0.419392
ENST00000266970.8	0.086159	0	0	0.853636
ENST00000267023.8	0	0	3.27948	0
ENST00000267064.8	0	0.306138	0	0
ENST00000267068.5	0	0	1e-06	0
ENST00000267082.9	0	0	13.5784	0
ENST00000267103.9	0.443175	0	7.18405	2.93551
ENST00000267113.4	2.20599	1.71647	13.7206	12.9076
ENST00000267115.9	0	0	2.06052	1.01236
ENST00000267116.7	0.011905	0.037547	0	0.065712
ENST00000267163.5	0.346205	0.125435	3.50758	1.79156
ENST00000267176.8	0	1e-06	3e-06	5e-06
ENST00000267197.9	0	0.09588	0	0
ENST00000267199.8	0	0	0.86663	0
ENST00000267202.6	0.047139	0	0.397992	0.23223
ENST00000267205.6	0.043352	0	0	0
ENST00000267229.11	0.2201	0	1.33435	0.636109
ENST00000267328.4	0	0.092451	0.801597	0
ENST00000267339.6	0.062532	0	0.572011	1.15369
ENST00000267396.8	0	0.072682	0	0
ENST00000267425.7	0	0.160496	0	0.123514
ENST00000267460.8	0	0.023412	0.202989	0.096769
ENST00000267522.7	0.186519	0	0	0
ENST00000267549.4	0.091772	0.092888	0.796958	1.14513
ENST00000267620.14	0.043059	0	0	0
ENST00000267622.8	0	0.017106	1.07515	0.493147
ENST00000267750.8	0.52972	0	0	1.81137
ENST00000267807.11	0	0	0.277641	0
ENST00000267812.3	0.242433	0.096709	0.561419	1.84221
ENST00000267838.6	0	0	1.37986	0
ENST00000267842.9	0	0.174621	0	0
ENST00000267859.7	0.044811	0.034439	0	0.164934
ENST00000267884.10	0	0	4.55193	0
ENST00000267889.4	0	0	2e-06	7e-06
ENST00000267890.10	1e-06	1e-06	0	0
ENST00000267918.9	0.41617	0.863337	15.2908	3.08678
ENST00000267950.12	0	0	0	1.27503
ENST00000267953.3	0.616031	0	4.75529	0
ENST00000267984.3	0.149829	0.057168	0.495672	0.472591
ENST00000267996.11	0	0.167776	0	0
ENST00000268058.7	0	0	0	0.348805
ENST00000268154.8	0	0	0.341491	0
ENST00000268182.9	0.230114	0	0	0.806571
ENST00000268349.7	0.11164	0	0	0
ENST00000268379.8	0.210447	0	0.969358	1.11371
ENST00000268383.6	0.038564	0	1.78612	1.27722
ENST00000268389.5	0.041369	0	0	0
ENST00000268482.7	0.157584	0.36076	0	0
ENST00000268483.7	0.049146	0	0	0
ENST00000268489.9	0.122611	0.032688	1.20166	0.346358
ENST00000268607.9	0	0.079489	0.709491	1.60144
ENST00000268638.9	0	0	1.08849	0.542796
ENST00000268668.10	0.914934	0	0	0
ENST00000268712.7	0	1e-06	6e-06	3e-06
ENST00000268717.9	0	0	0	3.88275
ENST00000268719.8	0.07349	0.065428	0.283645	0.135219
ENST00000268758.13	0.130594	0.406934	0	0
ENST00000268766.10	0.031131	0	0	0
ENST00000268795.5	0.106932	0	0	0
ENST00000268802.9	0	0.306129	1.11431	0
ENST00000268957.3	0	0.670111	1.66005	5.14395
ENST00000269033.7	0	0	0.256739	0
ENST00000269097.8	0	0	0	1.5133
ENST00000269122.7	0.157847	0.060163	0	2.97943
ENST00000269138.9	0	0	4.27293	7.00677
ENST00000269142.9	0	0	0.684522	0
ENST00000269143.7	0.128132	0.128334	1.85453	1.06091
ENST00000269159.7	0	0	0	0.756146
ENST00000269195.5	0	0.036055	0	0
ENST00000269197.11	0	0	0	1e-06
ENST00000269214.9	0	0.030632	0.265594	0.37984
ENST00000269228.9	0.120611	0	0	0
ENST00000269243.8	0.014881	0.018035	0	0
ENST00000269280.8	0	0	0	0.492018
ENST00000269300.8	0	0.158365	0.556706	0
ENST00000269305.8	0	0	2.50631	0
ENST00000269349.7	2.65227	3.55251	25.9017	22.559
ENST00000269361.11	0	0	0	0.809286
ENST00000269383.7	0.090688	0	0	0
ENST00000269385.8	0	0	0.317272	0
ENST00000269391.10	0	0.030553	0	0
ENST00000269394.3	0	0	0	0.154452
ENST00000269395.6	0	0.131355	0	0
ENST00000269397.8	0.078243	0.060041	0.911317	0.431948
ENST00000269445.10	0	0.027422	0	0
ENST00000269466.7	0	0.124805	0	0
ENST00000269499.9	0	0	0.230343	0
ENST00000269576.5	0.060848	0	0	0.33587
ENST00000269593.4	0	0.063409	0	0.524182
ENST00000269701.6	0.16987	0	0	2.34419
ENST00000269724.5	0	0.381858	0	0
ENST00000269814.8	0.264314	0	0	0
ENST00000269844.4	0.022973	0	0.27942	0
ENST00000269856.4	6.83727	6.56266	63.2162	3.88823
ENST00000269886.7	0.082897	0	1.38415	0
ENST00000269919.10	0.245617	0.165613	0.75935	1.0594
ENST00000269967.3	0.111197	0.083608	1.44984	1.38233
ENST00000270139.7	0.054626	0.045061	0.796487	1.02947
ENST00000270142.10	3.74046	6.46429	49.1854	27.9338
ENST00000270162.7	0.06475	0	0	0
ENST00000270221.10	0	0	0	4.94186
ENST00000270225.11	0.433041	0.817782	9.33543	6.69653
ENST00000270233.11	0.340207	0.340742	2.462	0.938944
ENST00000270301.11	0	0.08972	0.518609	0.24723
ENST00000270357.9	0.028134	0	0.337237	0.564614
ENST00000270460.10	2e-06	0.026304	1.7e-05	1e-05
ENST00000270502.6	0.295366	0.394441	5.12999	0.815186
ENST00000270517.11	0.678581	0	0	0
ENST00000270530.8	0	0	0	0.148719
ENST00000270586.7	5.63635	3.86909	44.9586	28.4383
ENST00000270625.6	15.8176	6.79157	368.468	246.355
ENST00000270649.10	0.021525	0	0	0
ENST00000270708.11	0.126018	0	0	0
ENST00000270776.12	0	0.266553	0	5.82489
ENST00000270792.9	0.438157	0.58549	11.7891	10.722
ENST00000270815.4	0.096973	0.043167	0	0
ENST00000271002.14	0.897346	1.34814	16.8841	4.10563
ENST00000271139.12	0	0.049679	0	0
ENST00000271324.5	8.87539	9.84871	117.488	62.5272
ENST00000271373.8	1.75458	1.19158	17.0733	4.43953
ENST00000271375.6	0.047865	0.089663	0.76146	0.245828
ENST00000271411.8	6e-06	0	3e-06	2.9e-05
ENST00000271417.7	0	0.0105	0	0
ENST00000271450.10	0	0	1.50375	0
ENST00000271452.7	0	0	0	1.4665
ENST00000271526.8	0.342573	0.530481	3.44965	4.11127
ENST00000271583.7	0.054282	0	0.586998	0.968996
ENST00000271628.8	1.85509	2.58079	15.6744	8.57928
ENST00000271638.2	1.75013	2.52842	103.514	62.4389
ENST00000271732.7	0.046132	0	0	0.248776
ENST00000271883.9	0	0.023668	0	0
ENST00000271915.8	0	0	3e-06	1e-06
ENST00000272065.9	0.110241	0	0	0.62359
ENST00000272091.7	0.235139	0.1308	3.02478	0.878249
ENST00000272102.9	0.479631	0.233693	0.915201	1.52835
ENST00000272117.7	0	0.068517	0	0
ENST00000272139.4	0.073736	0	0	0
ENST00000272163.8	1.49797	1.50949	16.1022	11.0212
ENST00000272167.9	0.063202	0.084402	0	0
ENST00000272224.4	0.042528	0.056653	0.135709	0
ENST00000272227.7	0.707738	2.44437	25.8462	16.7433
ENST00000272233.5	0.791928	1.23383	9.67904	3.88562
ENST00000272249.7	0.095403	0.254808	3.41083	2.21245
ENST00000272252.9	0.190292	0	1.47338	0
ENST00000272317.10	0	0	10.3003	0
ENST00000272322.8	0.060036	0	0	0.165696
ENST00000272342.5	0	0.121859	0.352192	0.335792
ENST00000272348.6	0	0	0	45.1886
ENST00000272402.2	0	0.105064	0	0
ENST00000272424.9	0	0.229261	0	9.44859
ENST00000272444.7	0.634745	0.593362	0	4.90517
ENST00000272519.9	0	0	0	0.308956
ENST00000272542.7	0.215268	0.369612	1.42432	1.0185
ENST00000272638.13	0.112051	0.353622	2.05736	0
ENST00000272645.8	0.021188	0	0	0
ENST00000272647.9	0.222689	0.327124	1.54709	1.47505
ENST00000272746.9	0.279784	0	0	1.61081
ENST00000272748.8	0	0	0.171372	0.37528
ENST00000272898.11	0	0	0	0.552427
ENST00000272928.3	0	0	0	0.931142
ENST00000273027.6	0.184405	0	0	0
ENST00000273038.7	0	0.074491	0.322938	0
ENST00000273047.8	0	0	4.76098	0
ENST00000273048.2	0.063607	0	0	0
ENST00000273062.6	0.197552	0.064259	0.457485	1.01968
ENST00000273130.8	0.416495	0	0	0.622085
ENST00000273158.9	0	0	2.36832	0
ENST00000273221.8	0.263519	0.279291	1.18898	1.6513
ENST00000273223.10	11.7441	14.4217	110.255	97.9202
ENST00000273258.3	1.15664	0.701739	14.3884	10.6372
ENST00000273261.7	0	0.078753	0	0.325515
ENST00000273317.4	0.018241	0	3e-06	0.068974
ENST00000273352.7	0.033135	0	0	0
ENST00000273398.7	0.038066	0.108733	0.414088	0.696104
ENST00000273582.9	0	0	0	0.329402
ENST00000273590.3	0	0.130776	0	0
ENST00000273596.7	0	0	1.15545	0
ENST00000273598.7	0.079714	0	0	0
ENST00000273668.6	0	0	13.6338	6.49948
ENST00000273783.7	0.431801	0.350888	3.63618	3.46687
ENST00000273814.7	0	0	0.518158	0
ENST00000273853.10	0.024468	0	0	0
ENST00000273854.7	0.012514	0	0	0
ENST00000273859.7	0	0	0	0.429369
ENST00000273960.7	0	0	0.693135	0
ENST00000273968.4	0	0.103348	3.58432	0.427177
ENST00000273986.9	0	0	0.452345	0.452715
ENST00000274000.9	0.03588	0	0	0
ENST00000274008.4	0.021354	0.048207	0	0.199006
ENST00000274026.9	0.130343	0.19893	2.15603	1.64018
ENST00000274031.7	0.028103	0	0.171941	0
ENST00000274054.2	0.05489	0	1.90667	1.51491
ENST00000274063.4	0.051464	0	0	0.284074
ENST00000274137.9	1.31733	1.08964	19.2695	11.3476
ENST00000274140.9	0	0.062011	1e-06	0.209957
ENST00000274203.13	0	0	1e-06	2e-06
ENST00000274217.3	0	0.038582	0	0.47844
ENST00000274242.9	0	0	0.177891	0
ENST00000274254.9	0.136714	0	0	0
ENST00000274306.6	12.7513	21.0071	205.599	129.587
ENST00000274311.2	0.09041	0.127463	1.10516	0.395139
ENST00000274327.11	0	0	0	1.26444
ENST00000274364.10	0.514083	0.447206	0	1.13904
ENST00000274376.10	0.110752	0.110927	1.28238	0.381001
ENST00000274456.6	1.14577	0	0	5.60435
ENST00000274457.4	0	0.118939	0.412503	0.491632
ENST00000274496.9	0	0	0.943489	0
ENST00000274542.6	0	0	0.715789	0
ENST00000274562.13	0	0	3.32926	2.01194
ENST00000274606.7	1.46969	0	0	0
ENST00000274625.5	0	0	0.610026	0
ENST00000274643.8	0	0	0.206609	0
ENST00000274680.8	0.31543	0.252742	2.92185	1.3929
ENST00000274695.8	0	0	1.03965	0
ENST00000274712.7	7.95946	8.09525	112.929	61.6555
ENST00000274721.7	0.153855	0	0	0
ENST00000274787.2	0.967912	1.93887	16.811	9.18654
ENST00000274811.8	0.087035	0	0.578564	0
ENST00000274813.3	0.166262	0.148021	1.28342	0.611828
ENST00000274849.2	0.31772	0.707157	2.86132	1.94863
ENST00000274891.10	0	0	4.2883	2.29751
ENST00000274963.12	0.102327	0	0	0
ENST00000274990.4	0	0	0	1.47601
ENST00000275034.4	0.117336	0.112313	0.722771	0.575618
ENST00000275036.11	0.385596	0	0	0
ENST00000275072.4	0.022031	0.058842	1.78565	0.724893
ENST00000275227.8	0.051522	0.058854	1.02059	0.633084
ENST00000275230.5	0.023222	0	0	0
ENST00000275233.11	0	0.083176	0.671156	0
ENST00000275235.8	0.351518	0	0	0
ENST00000275246.11	1.58685	0.583558	9.26346	5.01735
ENST00000275364.7	0.237139	0.063306	1.37224	0.645436
ENST00000275418.11	0	0	2.18028	0
ENST00000275517.7	0.080596	0.215262	3.73285	0.889757
ENST00000275575.11	0.045693	0	0	0
ENST00000275603.8	1.31755	0.976997	7.97844	8.85678
ENST00000275766.1	0	0	0.692331	0.42365
ENST00000275767.3	0	0	0.606493	0
ENST00000275820.3	0	0.113806	0.197351	0
ENST00000276055.3	0	0.243646	0.528132	0
ENST00000276062.8	3.25288	3.29545	22.047	24.766
ENST00000276072.7	0	0.028104	0	0.904291
ENST00000276077.1	0.083875	0	0	0
ENST00000276079.12	0.200844	0	6.57506	1.4534
ENST00000276096.10	0	0	0	4.98314
ENST00000276123.7	0	0	0.417627	0.19909
ENST00000276185.8	0	0	0	0.156426
ENST00000276202.8	0.312561	0	0	0.746249
ENST00000276204.10	0	0.216565	0	0
ENST00000276282.6	0.052477	0.022807	0.373869	0.534691
ENST00000276390.6	0.217321	0.241848	3.3551	2.59909
ENST00000276420.8	0.284653	0	3.75536	2.64564
ENST00000276440.11	0	0	0.390278	1e-06
ENST00000276461.9	0.068404	0.113913	0.790099	0.210066
ENST00000276533.3	0.121069	0	1.58	0
ENST00000276569.7	0.063967	0	1.68393	0
ENST00000276585.8	2.26003	0.670694	0	1.97103
ENST00000276602.10	0	0	0	0.298689
ENST00000276603.9	0.277691	0.417657	5.06981	2.00959
ENST00000276689.7	2.8718	0	36.7524	20.0235
ENST00000276704.5	0.078569	0	0	0
ENST00000276893.9	0.090344	0.120648	1.74347	0
ENST00000276914.6	0.31832	0	1.84289	1.97053
ENST00000277010.8	0	0	0	1.04917
ENST00000277165.10	0.194566	0.189353	3.04903	0.670859
ENST00000277198.6	0	0.071069	0	0
ENST00000277459.8	0.095846	0	0.554894	0.264528
ENST00000277541.7	0.057009	0.034111	1e-06	0.429341
ENST00000277554.3	0	0	0.173738	0
ENST00000277570.9	0.062399	0	0	0
ENST00000277575.5	0.022993	0	1.06497	0
ENST00000277746.10	0	0	0.654374	0
ENST00000277817.10	0	0	0.549782	0
ENST00000277865.4	0.787674	0.823215	6.00139	3.10328
ENST00000277882.7	0	0.900016	0	0
ENST00000277895.9	0	0.13812	0	0
ENST00000277900.12	0.051266	0.208403	1.52462	1.38635
ENST00000277942.6	0	0.031345	0.305447	0
ENST00000277945.11	0	0	2.01959	0
ENST00000278070.6	0	0	0.900644	0.858706
ENST00000278100.10	0	0.449641	4.78572	2.71627
[truncated: 35,379 more rows]

## Sheet: Mk ribo-seq
Name	TPM_MK42neg_1	TPM_MK42neg_2	TPM_MK42neg_3	TPM_MK42pos_1	TPM_MK42pos_2	TPM_MK42pos_3
ENST00000000233.9	31.0294	30.1762	37.7793	24.1229	23.3404	26.9797
ENST00000000412.7	0.152388	0.152235	0	0	0.268222	0
ENST00000000442.10	0	0	2.00406	0	4.91996	0
ENST00000001008.5	19.7911	13.8023	16.9982	11.7962	4.04908	13.8167
ENST00000002125.8	0.928118	0	0	1.19132	0.840284	0.859821
ENST00000002165.10	17.9263	21.8272	30.152	12.227	14.7281	20.7679
ENST00000002596.5	0.025384	0.14348	0.03655	0.117439	0.078032	0.172328
ENST00000003100.12	30.566	21.7261	22.965	22.7403	19.5028	23.0509
ENST00000003302.8	0.154736	0	0	0	0.047798	0.033
ENST00000003912.7	0.074584	0.027938	0.055105	0.134007	0.193905	0.054635
ENST00000004103.7	0	0.868632	0	0	0	0
ENST00000004982.5	0	0.134989	0	0	0.186819	0
ENST00000005082.13	0	1.2137	1.70476	0	2.18787	0
ENST00000005178.5	0.10478	0.070177	0	0.217789	0	0
ENST00000005257.6	1.39419	0.95933	1.37971	2.09149	1.76881	0.939584
ENST00000005259.8	0.015448	0.038219	0.020051	0.020715	0	0.047285
ENST00000005260.8	0	0	0.048152	0.01385	0.004957	0.023073
ENST00000005284.3	0	0.030692	0	0	0	0
ENST00000005340.9	2.88748	2.34502	1.47956	2.38047	1.71834	1.77305
ENST00000005374.10	0	0	0	0	0	0.046582
ENST00000005386.7	0.187614	0.090823	0	0.100182	0	0
ENST00000005558.8	11.2762	7.58988	7.52596	21.995	32.0264	12.4317
ENST00000005995.7	1.32103	0	0.310076	0.291893	0	0
ENST00000006658.10	0	0	0.0673	0	0	0.152502
ENST00000006777.10	10.4043	5.03889	2.33818	4.42001	1.72501	1.88538
ENST00000007264.6	0.884123	0.493647	0.608866	0.920104	0.748665	0.646716
ENST00000007390.2	5.84256	5.6539	5.74536	6.32018	7.23713	6.42277
ENST00000007414.7	0	0	0	0.033016	0	0
ENST00000007510.8	0.645711	0.503081	0.241604	0.286496	0.358391	0.219888
ENST00000007516.7	68.3826	72.767	126.18	59.8676	54.0276	108.622
ENST00000007708.7	0	0.151478	0	0	0	0
ENST00000007722.11	0.073103	0	0	0	0	0
ENST00000007735.3	0	0.049467	0	0	0	0
ENST00000008180.13	0	0	0	0.794881	0	0
ENST00000008440.9	0	0	0	0.126292	0	0
ENST00000008527.9	5.67656	3.85139	4.65153	5.48209	5.39927	5.52485
ENST00000008876.7	0.008023	0.02094	0.003857	0	0.019448	0
ENST00000008938.4	0	0.090057	0	0	0	0
ENST00000009041.11	0.410817	0.538755	0	0	0.510755	0
ENST00000009180.9	419.135	266.989	228.155	551.158	560.157	16.3553
ENST00000009530.11	594.404	493.863	239.325	82.3473	33.5237	23.3973
ENST00000009589.7	247.209	227.795	494.13	210.532	128.627	589.704
ENST00000010132.6	0.077048	0	0	0	0	0
ENST00000010299.10	1.55121	3.21427	1.17132	1.32886	0	3.46158
ENST00000010404.6	0	0	0.405424	0	0	0
ENST00000011473.6	0	0	0	0.084973	0	0
ENST00000011619.5	21.5509	24.5374	25.4388	27.6826	33.9461	36.0148
ENST00000011653.8	0.117729	0	0.478533	0.275336	0.364728	0.039731
ENST00000011684.11	0	0	0	0	0.064306	0.042186
ENST00000011691.5	31.3223	27.5845	25.3351	18.5755	16.4814	21.8556
ENST00000011700.10	0	0	0.254095	0	0	0
ENST00000011898.9	4.44688	4.17117	3.56331	5.02656	8.27546	1.66474
ENST00000011989.11	0	0.038474	0	0	0	0
ENST00000012049.9	9.00886	4.77372	7.29803	5.14041	2.86423	4.87079
ENST00000012134.7	0.058025	0	0	0	0	0
ENST00000012443.8	7.32329	7.65473	8.52713	5.19634	6.25529	9.99865
ENST00000013034.3	31.8191	29.8452	32.2514	15.2747	3.47934	52.0968
ENST00000013070.10	0.031946	0.04072	0	0.013535	0.103626	0.009791
ENST00000013125.8	7.60704	6.7406	4.16856	6.81151	8.48593	4.7173
ENST00000013222.5	0.226388	0.502272	0.020509	0.078907	0	0
ENST00000013807.9	0	0	0.440737	0.860975	1.91525	0.469536
ENST00000013894.3	2.90447	3.17023	2.27842	8.80605	5.47422	8.60185
ENST00000014914.5	0.201741	0.132973	0.088125	0.143406	0.12436	0.088462
ENST00000014930.8	15.3836	15.5544	13.8845	15.4545	9.60772	10.6096
ENST00000014935.7	0	0	0.119952	0	0	0
ENST00000016171.5	21.3578	20.897	20.1942	16.3119	15.6011	14.7488
ENST00000016946.7	0	0	0	0.18884	0	0
ENST00000017003.6	1.44649	2.5258	1.55507	6.64629	7.58546	4.97253
ENST00000019019.6	0	0.441556	1.08725	0.901257	1.09927	0.497099
ENST00000019317.8	0.269572	0.254332	0.058447	0	0	0.233666
ENST00000020926.7	0.03231	0.024151	0	0	0	0
ENST00000022615.8	0.591909	0.233719	0.351047	1.09926	1.1637	0.402988
ENST00000024061.7	0	0	0.040306	0	0	0
ENST00000025008.9	0	1.69119	0	2.35303	0.873446	0.988311
ENST00000025301.3	6.21925	5.07412	3.61726	4.93034	4.69488	4.3222
ENST00000025399.10	64.9787	81.0048	114.102	90.017	82.9706	155.34
ENST00000026218.9	0	0.204641	0	0	0	0
ENST00000027335.7	0	0	0	0.004749	0	0
ENST00000028008.9	50.9665	12.9319	5.29169	30.0237	9.55843	6.36469
ENST00000029410.9	0	0.140205	0	0.156853	0.632665	0
ENST00000031146.8	0.169211	0.11586	0.065433	0.092574	0.065254	0.06243
ENST00000033079.7	0.267769	0.236562	0.109676	0.195168	0.183918	0.090932
ENST00000034275.12	5.06542	2.77166	0	10.8504	6.89827	7.60195
ENST00000035307.6	14.6539	9.39387	4.38701	12.1648	11.9492	7.59584
ENST00000037243.6	0	0	0.191038	0	1.11836	0
ENST00000037869.7	0.180963	0.225317	0.150122	0	0	0.141362
ENST00000038176.7	6.05547	8.61692	3.63137	1.83808	1.35102	2.6113
ENST00000039989.8	6.80799	3.7568	2.21	3.46019	4.69995	0.645011
ENST00000040663.7	8.50748	8.01746	8.3719	5.88695	4.51451	5.56428
ENST00000040738.9	9.03303	5.35474	2.52713	4.2646	3.8849	3.22278
ENST00000040877.1	1.45907	2.21825	2.62987	0.43821	0.470199	1.28877
ENST00000042381.8	3.80808	1.96561	0	2.44166	4.72966	7.47153
ENST00000042931.1	0.162749	0.033118	0	0	0.075722	0.03156
ENST00000043402.7	0.074409	0.158595	0.119581	0	0	0
ENST00000044462.11	0.010316	0.01766	0.024636	0.004634	0	0.013975
ENST00000045347.11	0	0	0	0	0.115906	0
ENST00000046640.7	11.5956	10.1	8.21649	10.7099	9.87904	8.18296
ENST00000046794.9	0.341774	0.17545	0	0.101343	0.042664	0.090538
ENST00000052569.10	8.39794	7.24428	4.41514	10.1466	8.79651	8.73484
ENST00000053468.3	14.2247	14.3164	17.7643	12.32	13.7755	18.9233
ENST00000053867.7	1.27642	0.323714	0	0.467092	0.521339	0.742534
ENST00000054650.8	0.239366	0	0.349363	0.03651	0.997162	0.359916
ENST00000054666.10	2.02812	2.0763	1.16817	2.31015	2.49464	3.38629
ENST00000054668.5	0	0.70665	0	0	0	0.608125
ENST00000054950.3	5.86709	4.97174	3.20884	1.53869	0.878929	1.08256
ENST00000055077.7	22.1718	17.1973	6.30617	5.97792	8.87445	9.28161
ENST00000055335.10	0.362857	0.184709	0.416003	0.751951	0.428696	0.709793
ENST00000056233.3	3.55662	1.78546	0.222635	1.05773	0.635968	0.350409
ENST00000057513.7	0.019183	0.041536	0	0	0.185503	0.041917
ENST00000062104.3	0.566381	0.245808	0.842879	0.054364	0.084157	0.369279
ENST00000064778.8	0.087775	0.106255	0	0.047024	0.070238	0.031224
ENST00000066544.7	0.277971	0.156002	0.225222	0.065288	0.081711	0.096222
ENST00000070846.10	1.67731	1.03453	1.91495	3.45399	0.671041	1.84797
ENST00000072516.7	0	0.027559	0	0	0	0.046376
ENST00000072644.6	0	0	0	0.279712	0	0
ENST00000072869.8	1.17149	0.399072	0.15633	0.561096	1.31014	1.57543
ENST00000074304.9	0	0.036467	0	0	0	0.012719
ENST00000075120.11	44.9318	32.5472	26.0135	27.6615	46.795	29.3422
ENST00000075322.10	2.08542	1.4935	0.427027	0.162982	0.061047	0
ENST00000075430.11	0.208455	0	0.333631	0.567582	0	0.177205
ENST00000075503.7	0.204839	0.188829	0	0.055575	0.131933	0.019734
ENST00000078429.8	0.9732	0.546587	0.349986	0.356044	0.386343	0.373998
ENST00000078527.8	1.99225	0.346719	2.29308	1.14537	0.395684	1.08563
ENST00000081029.7	1.61677	2.28406	2.75348	1.28823	0.483805	2.9079
ENST00000082468.11	0	0	0.073176	0	0	0
ENST00000083182.7	0.803698	1.11738	0.906353	0.685078	0.828466	0.761324
ENST00000084795.9	51.0892	45.373	453.606	66.2446	73.4898	190.429
ENST00000084798.8	2.24452	1.83834	1.45812	3.71309	4.58593	1.4042
ENST00000085068.7	2.37042	5.45236	4.70636	4.65074	2.75745	3.84456
ENST00000085079.11	12.5542	10.8619	10.0792	10.6158	10.6075	9.01421
ENST00000155093.7	0.017894	0	0.029061	0	0	0.030739
ENST00000155674.9	0	0	4.75582	0	0	0
ENST00000155840.10	0.102798	0	0.073828	0.040179	0	0
ENST00000155926.8	1.50997	2.65836	1.17249	0	0	0.118081
ENST00000156084.8	0	0.435144	0	0	0.506506	0.170872
ENST00000156109.6	22.9206	23.4859	21.332	17.1941	13.8917	17.2005
ENST00000156471.9	0.318037	0.172351	0.168569	0.153063	0.073307	0.110085
ENST00000156499.6	0	0.030179	0	0	0	0
ENST00000156825.5	0.544661	0.643951	0.306939	0.951279	0.426851	0.73378
ENST00000157600.7	0.066092	0.017696	0	0	0.014105	0.013456
ENST00000157812.6	0	0	0.404779	0.750932	0	2.31716
ENST00000158166.5	0.375032	0.41526	0	0	0.169057	0.240867
ENST00000158526.9	1.08177	0.110347	0.144221	0.137717	0	0.121236
ENST00000158762.7	24.4074	22.7026	12.0756	12.2188	10.678	8.61998
ENST00000158771.8	0.305174	0.274243	0.423147	0.246247	0.074094	0.196987
ENST00000159060.2	0.075453	0	0	0	0	0
ENST00000159087.6	2.32589	2.08877	1.15297	3.41464	3.22362	1.06644
ENST00000159111.8	2.59955	2.96644	0	0	0	0
ENST00000159647.9	0.142314	0.031723	0	0.291202	0	0
ENST00000160262.9	12.5759	12.1916	2.40388	0.441445	0	0.294958
ENST00000160298.8	0.019675	0	0.021975	0.006615	0.032253	0
ENST00000160373.7	13.7846	6.64976	4.80797	8.45764	6.52495	5.89438
ENST00000160740.7	1.75976	1.35071	0.618298	0.760097	0.90848	1.21287
ENST00000160827.8	34.4155	36.6493	51.5066	17.3944	15.1177	23.2556
ENST00000161863.8	2.49415	2.45123	3.16169	1.76954	2.04333	2.69301
ENST00000162330.9	0	0	0	0	0	0.117543
ENST00000162391.7	2.52081	2.54894	1.35227	1.71397	2.39615	1.86277
ENST00000162749.6	0	0.118896	0.256001	0.143098	0	0.144059
ENST00000163416.6	14.2914	10.971	7.76367	12.7906	14.8875	10.1173
ENST00000163678.11	4.08984	3.61989	2.06507	4.16231	1.27972	2.18915
ENST00000164024.4	0.355349	0.273011	0.140815	0.136428	0.061138	0.130918
ENST00000164133.6	1.08502	1.08576	0.911941	1.14151	1.53797	0.855196
ENST00000164139.3	0	0.012351	0	0	0	0
ENST00000164227.9	1.85577	1.36917	0.657823	2.59255	1.34497	1.31567
ENST00000164305.9	0.691813	0.145209	0.235971	0.729711	0.196212	1.82182
ENST00000165086.8	0	0	0	0	0	0.338352
ENST00000166139.8	0.276049	0	0	0.074018	0	0
ENST00000166244.7	0	0.006332	0	0	0	0
ENST00000166345.7	3.1339	4.25405	7.00975	1.56078	1.34032	5.66732
ENST00000166534.8	0.692003	0.875163	0	1.3545	0	0.187164
ENST00000167106.8	0.053436	0.043488	0.091145	0.196858	0.153786	0.183126
ENST00000167218.9	2.5968	3.5534	3.73858	0.194021	3.09808	1.23457
ENST00000167462.9	0	0.164308	0.184179	0	0	0
ENST00000167586.6	0	0.040255	0	0	0	0
ENST00000167588.3	0	0	0.009932	0	0	0
ENST00000167825.5	0	0	0	0	0.089253	0
ENST00000168216.10	54.1223	63.4723	90.5195	46.5869	48.9235	74.3357
ENST00000168977.6	0	0	0.464007	0	0	0.789659
ENST00000169551.10	0.40854	0.189476	0	0.632635	0	0.482808
ENST00000170150.3	0	0	0	0	0	0.006263
ENST00000170168.8	3.34624	3.42972	2.66123	2.66098	2.52011	2.16201
ENST00000170447.11	0.534883	0.425765	0.420974	1.23917	0.634152	0.462165
ENST00000170564.6	3.14208	1.45797	2.29754	2.06639	1.55808	2.40796
ENST00000171111.9	2.76146	1.82909	1.03248	1.88839	0.266096	1.24137
ENST00000171757.2	0	0.079707	0.15102	0.085488	0	0
ENST00000171887.8	0	0	0	0.024044	0.035659	0.038089
ENST00000172229.7	0.011208	0	0	0	0	0
ENST00000172853.14	6e-06	1.1e-05	1.1e-05	0	0	0
ENST00000173229.6	0.05127	0.07352	0.042948	0.024966	0.036021	0.007903
ENST00000173527.5	15.8566	18.0725	35.9639	11.2363	16.5465	21.2801
ENST00000173785.4	0.886364	0	0	0	0.31647	0.373896
ENST00000173898.11	4.27079	3.00261	1.27992	1.31018	0.936603	0.657988
ENST00000174618.4	2.45133	1.85549	1.15282	2.39797	2.2253	1.17826
ENST00000175091.4	91.7349	67.1735	38.2102	58.3406	51.0914	30.668
ENST00000175506.8	1.2725	0.256228	0.393105	7.00698	3.87036	1.95685
ENST00000175756.9	2.32431	0.907726	0.767316	1.1399	0.469727	0.818332
ENST00000176183.5	0	0	0	0.048844	0	0
ENST00000176195.3	1.12676	0.092329	0	0	0	0
ENST00000176763.9	21.5774	15.0861	11.0608	17.1117	14.701	10.5274
ENST00000177742.7	2.72925	13.8883	22.2845	9.43538	6.13993	12.0731
ENST00000178638.7	0	0	0	0	0	0.007548
ENST00000178640.9	4.68475	3.22644	2.71313	3.95517	3.00628	3.25842
ENST00000179259.5	0.504315	0.779658	0.183515	0.244205	0	0.19841
ENST00000181796.6	0	0	0	0	0.078443	0.010217
ENST00000181839.9	0.051772	0.026589	0.014654	0.056502	0.112512	0.071516
ENST00000182290.8	2.89282	1.62544	0	5.58348	0	2.13491
ENST00000182377.8	32.5759	22.3197	22.5753	33.9633	7.09553	34.9181
ENST00000182527.3	3.45261	3.33505	4.52105	3.18488	3.45975	4.40948
ENST00000184183.8	0	0.019631	0	0	0	0
ENST00000184266.2	74.6795	119.471	117.086	104.277	127.1	195.775
ENST00000184956.10	0.354354	0.496295	0.416939	0.084896	0	0.886339
ENST00000185150.8	1.50322	1.17536	1.84776	4.51103	6.25792	1.98665
ENST00000186436.9	12.2945	10.6354	5.75746	6.24895	5.42071	6.31871
ENST00000187397.8	0	0	0.043244	0	0	0
ENST00000187762.6	0.01649	0.114896	0	0.067096	0.030502	0.016105
ENST00000187830.2	0.649302	0.456182	0.266695	0	0	0.606341
ENST00000187879.12	0.541485	0	0	0.179119	0	0.1159
ENST00000188312.6	1.8685	2.07076	0.38996	0.295648	0.243306	0.385304
ENST00000189444.10	5.57037	4.42748	3.51904	5.08181	5.82416	1.7581
ENST00000189978.10	0	0	0.032089	0	0	0.007381
ENST00000190611.8	0.181681	0.214516	0.017507	0.037	0.010604	0.021757
ENST00000191018.9	6.21797	68.363	71.2742	17.4582	81.355	59.0252
ENST00000191063.8	0	0	0	0	0.809468	0
ENST00000192788.5	0.366225	0.402095	0.151405	0.319783	0.526897	0.290027
ENST00000193322.7	0.994662	1.44272	0.744141	0.825884	1.0993	0.928472
ENST00000193391.7	0.009372	0.023144	0	0.026209	0.006514	0.01992
ENST00000193403.10	51.6661	37.9052	52.1778	39.0555	27.6695	48.4592
ENST00000194118.8	9.59884	8.3155	9.09296	7.60027	5.57996	5.5208
ENST00000194130.6	0	0	0.004671	0	0	0
ENST00000194155.6	0.080043	0.041	0.004858	0.004025	0	0.018547
ENST00000194214.9	37.7724	49.8178	70.5395	23.2628	18.5626	57.2462
ENST00000194530.7	4.12026	0	2.46053	2.62301	1.87422	2.84972
ENST00000194900.8	0.028996	0	0	0	0	0
ENST00000195173.8	0	0	0	0.036573	0	0
ENST00000196061.4	15.5267	13.9034	9.92838	10.3971	8.68222	7.96844
ENST00000196371.9	7.90222	10.1393	17.2646	5.84331	5.31698	14.5031
ENST00000196482.3	1.23869	1.23128	1.18924	0.680398	1.12297	0.640569
ENST00000196489.3	2.56237	3.34684	1.2637	2.19515	1.76063	1.39017
ENST00000196551.7	311.315	323.722	738.77	185.315	151.732	730.125
ENST00000197268.12	0	0.015369	0	0	0	0.024808
ENST00000198536.6	1.90492	2.67671	0.321075	2.00892	0.498387	0.037151
ENST00000198767.10	0.044054	0.035691	0.00809	0.11582	0.359088	0.103472
ENST00000198939.6	4.48967	7.37727	10.4776	1.16033	2.98698	3.83815
ENST00000199280.3	0.018322	0	0	0.011896	0	0
ENST00000199320.8	0.290062	0.626557	0.827443	0.208563	0.358387	1.0605
ENST00000199389.10	22.2518	21.513	11.6816	29.9087	34.5522	13.8125
ENST00000199447.8	0.563875	0.052945	0	0	0	0
ENST00000199448.8	0.438661	0.24468	0.340179	0.239141	0.276895	0.722055
ENST00000199706.12	2.6486	3.13609	0.783	1.8608	1.65114	2.28428
ENST00000199708.2	5.76694	6.50526	10.0382	8.68812	12.383	13.0453
ENST00000199764.6	0.210067	0.436598	0.205678	0	0	0.008765
ENST00000199814.8	0.174103	0	0	0	0.082267	0
ENST00000199940.10	0.773602	0	0.212674	0.999664	1.39514	1.45716
ENST00000200135.7	4.84464	3.3573	5.60677	1.65314	3.40143	3.45276
ENST00000200181.7	0.156561	0	0.224418	0	0	0
ENST00000200453.5	45.6845	34.2553	12.9967	88.7701	63.4931	29.2379
ENST00000200457.8	7.29879	8.45083	9.97255	6.1699	5.05349	10.8692
ENST00000200557.10	0	0	0	0	0	0.005155
ENST00000200639.8	95.0555	103.627	56.1656	58.9605	59.4021	48.002
ENST00000200652.3	0.174825	0.444087	0.085916	0.015135	0	0
ENST00000200676.7	0	0	0	0.335812	0	0
ENST00000200691.4	0.219206	0	0	0	0	0
ENST00000201031.2	0	0	0	0	0	0.004126
ENST00000201943.10	0	0	0	0.093897	0	0.316091
ENST00000201961.6	15.5262	14.7445	15.0752	17.6603	19.3701	16.6687
ENST00000201979.2	0.580256	0.057056	0	0.753489	0.032613	0.035777
ENST00000202017.5	5.9976	8.1698	7.28901	5.25054	4.4621	6.37923
ENST00000202556.13	0	0	0	0	0	0.044423
ENST00000202677.11	4.27832	3.47202	2.23733	1.63366	1.17348	1.63545
ENST00000202773.13	325.789	355.091	674.805	245.109	209.268	734.182
ENST00000202816.5	5.85729	4.82152	4.0624	2.24192	2.18159	4.13139
ENST00000202831.7	0.119392	0	0	0	0	0.041949
ENST00000202834.11	18.5367	13.6448	16.1128	21.6196	18.6428	19.812
ENST00000202917.9	1.30862	1.73484	0.588587	0.579186	0	0
ENST00000202967.4	0.380445	1.12621	0.342719	0.248137	0.479062	0.197073
ENST00000203001.6	8.84977	7.43571	7.61361	6.30662	5.11745	9.65982
ENST00000203166.9	0.3559	0.783333	0.212773	0.278658	0	0.319731
ENST00000203407.5	1.89955	2.78579	1.98806	0.747316	0.180155	0.344423
ENST00000203556.8	0	0	0	0.51152	0.278669	0
ENST00000203629.2	0.214751	0.111981	0	0	0	0
ENST00000203630.9	0	0.248888	0.046741	0.273614	0.435944	0.089295
ENST00000203664.9	0.156063	0.26482	0.117658	0.063329	0.027411	0.078181
ENST00000204517.10	3.19654	3.17465	1.68758	1.02893	0.727629	0.881046
ENST00000204549.8	6.69695	5.72805	3.05409	5.07896	3.46139	3.41624
ENST00000204679.8	0	0.038827	0	0	0	0.113904
ENST00000204961.4	9.55656	7.93022	7.02982	15.129	18.2579	11.901
ENST00000205061.9	0.078492	0.125493	0.003902	0.096253	0.030059	0.028991
ENST00000205135.8	0	0.848021	0.368799	1.18111	0.492775	0.536485
ENST00000205194.4	3.3714	2.14727	2.31898	2.62847	2.45476	1.75554
ENST00000205214.10	0	0.879052	0.46451	0	0.781186	0
ENST00000205402.9	0	0.049084	0.047157	0	0	0.011916
ENST00000205557.11	0	0	0.002991	0.01333	0	0.015256
ENST00000205636.3	2.98984	2.30085	0.733056	3.22646	2.61524	3.03673
ENST00000205890.10	0	1e-06	0	0	0	0
ENST00000206020.7	35.126	41.0825	31.8781	46.2784	40.1966	50.5217
ENST00000206380.7	18.4366	16.0242	15.7158	16.8077	14.8229	14.9486
ENST00000206423.7	0.038638	0.027972	0.01925	0.047444	0.043894	0.006167
ENST00000206446.4	0	0	0	0	0	0.019381
ENST00000206451.10	45.4264	12.5994	26.1129	5.28786	25.6342	4.13653
ENST00000206513.5	0.473093	0.510964	0.167358	0.021589	0	0
ENST00000206542.8	2.37551	2.53686	1.64745	4.73434	3.0997	5.98432
ENST00000206595.10	0.010136	0.00862	0	0	0	0.021034
ENST00000207549.8	6.76996	4.97847	4.18668	3.92015	6.74062	4.00763
ENST00000207636.9	20.9812	0	5.645	8.82179	2.72379	11.4304
ENST00000207870.7	0.610435	1.16377	1.31588	0.619712	0.491653	0.860553
ENST00000209728.8	6.72358	5.69144	9.2029	1.78669	2.25999	7.66627
ENST00000209873.8	20.1728	19.3597	26.0971	10.3607	7.45603	20.9888
ENST00000209875.8	1.67974	1.39904	0.356068	0.513293	0.291056	0.579133
ENST00000209884.4	6.67535	6.16417	4.44817	8.35157	8.96625	6.59721
ENST00000210227.4	15.817	12.2661	6.90365	13.8802	10.259	7.41507
ENST00000210313.7	0.749836	0.569764	0.96423	0.78023	0.710792	1.00949
ENST00000210444.5	52.9087	47.1962	52.2796	27.6807	17.4036	44.7078
ENST00000211076.4	3.30494	2.09917	0	0.091304	0.218908	0
ENST00000211287.8	0	0.05867	0	0.161891	0.312462	0.032244
ENST00000211314.4	12.815	20.4847	26.5655	7.91937	8.56939	18.866
ENST00000211379.9	14.3111	12.2618	0	0	4.32842	0
ENST00000211921.11	0.785087	1.3434	3.20953	0.318332	2.53582	10.6731
ENST00000211936.10	3.46787	4.3541	2.06352	0.733163	2.01088	1.09587
ENST00000211998.9	21.7373	17.0808	15.0615	39.4834	52.5079	22.786
ENST00000212015.10	4.88562	5.69404	5.53862	4.94379	5.43399	6.97542
ENST00000214869.6	0	0	0	0	0	0.024829
ENST00000214893.9	0	0	0	0	0	0.010671
ENST00000215057.6	1.50391	1.65089	0.08752	1.19642	0.198776	0.830563
ENST00000215061.8	1.99919	0	0.360215	2.99386	0	1.86619
ENST00000215095.10	0.029166	0.040947	0.053237	0.10397	0.130187	0.018253
ENST00000215115.4	4.48201	3.17982	6.00533	2.2376	2.59626	2.73254
ENST00000215375.6	0.343413	0.687943	3.52553	1.49701	1.45222	4.76014
ENST00000215376.7	0.153322	0	0	0	0	0
ENST00000215565.2	140.163	149.438	137.778	136.564	109.439	124.384
ENST00000215567.9	45.8639	10.002	0	25.9539	0	25.1563
ENST00000215570.7	13.0495	9.13195	12.546	6.95848	4.75655	9.81623
ENST00000215574.8	17.1381	15.0146	12.657	21.117	14.874	12.7208
ENST00000215587.11	0	0	0.067541	0.348261	0	0
ENST00000215631.8	0.276934	0	0.020778	0.284816	0.078827	0
ENST00000215659.12	6.00892	3.50728	6.52428	2.21931	1.30439	2.57818
ENST00000215730.11	0.843006	0.931339	0.376165	1.14315	2.26158	0.416631
ENST00000215739.12	0.230844	0	0.154102	0.102505	0.097033	0.549453
ENST00000215742.8	0	0	3.3146	0	0	0
ENST00000215770.5	0.473148	0.051312	0.365959	0.098402	0.185556	0.227581
ENST00000215781.2	0.367747	0.102672	0.240651	0.153104	0	0
ENST00000215790.11	0.467055	0	0.029086	0	0	0.16175
ENST00000215793.12	23.4378	19.3923	14.8569	14.7169	13.5225	11.9776
ENST00000215794.7	12.9119	10.4375	8.11205	15.3759	13.0162	11.9948
ENST00000215798.10	0	0	0	1.81331	1.67426	0.088597
ENST00000215829.7	1.05535	1.97779	0.342386	0.421937	0.478944	1.26869
ENST00000215832.10	1.52668	1.03184	0.085717	0.246317	0.14868	0.122449
ENST00000215838.7	0.108429	0.087325	0	0	0	0
ENST00000215862.8	7.79107	6.57706	5.98942	5.02774	5.51294	5.14303
ENST00000215882.9	20.5798	31.8014	42.889	0	0	9.65422
ENST00000215885.3	0.227718	0.186595	1.5642	0.055444	0.099992	1.58393
ENST00000215886.5	0.47296	1.21802	0.090558	0	0	0
ENST00000215904.6	3.5908	1.88933	4.15581	3.1873	2.62846	3.66097
ENST00000215906.5	0.136918	0.065446	0	0.03951	0	0
ENST00000215909.9	290.478	496.356	158.391	99.8772	149.03	279.014
ENST00000215912.9	0.245698	1.07508	0	1.88389	1.77299	0.190399
ENST00000215917.11	0.977495	0.971641	0.688001	0.495282	0.308793	0.72822
ENST00000215919.3	3.40687	2.97195	3.1968	1.61026	1.11492	1.8012
ENST00000215939.2	2.1587	2.7258	3.65221	1.34798	3.92832	3.87296
ENST00000215941.8	0.558914	0.424119	0.309206	0.603923	0.275176	0.290467
ENST00000215956.9	6.15524	0	8.02487	12.7091	8.29193	0
ENST00000215957.10	1.29917	1.10136	1.00518	0.648347	1.13919	0.783114
ENST00000215980.9	13.2851	18.6964	30.7013	2.43729	1.48354	14.7382
ENST00000216019.11	1.32347	1.6175	0.444178	3.42099	3.43331	4.01701
ENST00000216024.6	0.992368	0.139348	0.325937	0.181711	0	0.102997
ENST00000216027.7	0	2.44074	0	0	2.85669	4.80853
ENST00000216034.5	4.55545	3.60111	3.62546	5.89081	3.37774	11.6291
ENST00000216036.8	0.090266	0.098621	0.228525	0.560026	0.648271	0.649311
ENST00000216038.5	52.7335	46.4927	56.435	38.506	30.6319	51.5359
ENST00000216039.9	0.302528	0.216407	0.212549	0.572703	0.479686	0.500987
ENST00000216044.9	4.95748	5.37567	3.5775	4.52438	3.41787	3.66841
ENST00000216061.9	1.73324	1.70445	0	0.612687	0.438656	0.169905
ENST00000216068.8	3.77656	4.49883	2.66736	4.01903	4.43429	2.01407
ENST00000216080.5	0.28485	0.282195	0	0	0	0.836165
ENST00000216083.6	11.0734	8.35549	8.50505	11.5053	10.983	7.74367
ENST00000216085.11	0.960012	0.791737	1.92249	3.1441	1.9955	2.41903
ENST00000216099.12	2.7988	2.90276	1.78606	2.03795	2.73066	2.17652
ENST00000216101.6	0.091519	0	0.104505	0	0	0
ENST00000216106.5	2.63158	1.54682	2.83425	2.08849	1.08849	1.86936
ENST00000216115.2	0.205476	1.04389	0.936358	0.35576	1.63608	0.646119
ENST00000216117.8	1.024	0.702143	0.79323	0.633926	0.049675	0.235764
ENST00000216121.11	13.3858	14.2076	15.7327	9.75512	9.76578	9.20142
ENST00000216122.8	0.083117	0.10404	0	0	0	0
ENST00000216124.9	3.54533	1.36928	0.204458	0.899763	0	0.299774
ENST00000216127.4	0	0	0.020059	0	0	0
ENST00000216129.6	19.0123	15.2796	19.4304	7.44829	3.39835	10.0382
ENST00000216133.9	0	0	0.154909	0	0.232007	0.046519
ENST00000216139.9	0.189319	0.022162	0.15708	0.210719	0	0.041689
ENST00000216144.3	0.058793	0.115597	0.078783	0.045797	0.005506	0.003624
ENST00000216146.8	138.267	187.49	155.388	94.2612	32.9885	401.003
ENST00000216160.10	2.62107	2.28554	1.90063	2.28999	2.68305	2.20281
ENST00000216180.7	1.35359	1.05403	1.82092	0.785727	0	1.32428
ENST00000216181.10	324.542	205.909	158.271	442.11	503.429	221.755
ENST00000216185.6	1.83286	2.33226	1.06387	1.02946	0.600936	2.80288
ENST00000216187.10	0.508782	0.378806	0.278214	0.385275	0	0.351425
ENST00000216190.12	0	0	0	0	1.50161	0
ENST00000216194.11	2.18834	7.41115	21.5941	5.52117	9.61961	20.3831
ENST00000216214.7	0.023315	0	0.093074	0.082799	0	0.005805
ENST00000216218.7	3.11001	1.91074	1.87344	1.89398	1.76302	1.58907
ENST00000216223.9	0.067225	0.0083	0.058027	0	0	0.002866
ENST00000216225.8	66.0414	62.3362	77.693	106.568	134.86	113.126
ENST00000216237.9	0	0.084654	0.110826	0	0	0.458486
ENST00000216241.13	0.126688	0.050593	0	0.657033	0.881999	0.230484
ENST00000216252.3	10.4081	8.9318	5.96388	4.30661	3.61701	8.11589
ENST00000216254.8	40.2702	34.0232	49.0323	37.4139	32.4153	35.1299
ENST00000216259.7	2.85666	4.60754	6.46509	4.23531	4.57352	4.94905
ENST00000216264.12	0.407198	0.298826	0.04539	0.095141	0	0.019592
ENST00000216268.5	4.32175	4.16133	3.17592	2.37088	2.76468	2.19661
ENST00000216271.9	0.491522	0	0	0	0	0
ENST00000216274.9	2.28697	1.26515	0.058103	0.58793	0	0.257639
ENST00000216277.12	0.07834	0.098411	0	0.174263	0.079248	0.044316
ENST00000216281.12	358.396	211.646	321.671	371.595	157.567	315.504
ENST00000216286.9	0.790422	0.673419	0.851082	1.77707	2.768	1.47912
ENST00000216294.4	9.07829	8.60706	4.3867	4.80917	3.13746	4.15407
ENST00000216297.6	43.2998	39.5101	36.4271	23.7075	19.7734	30.7281
ENST00000216327.10	0.194245	0.180734	0	2.80223	2.5242	1.95886
ENST00000216330.7	0.070679	0	0	0	0	0
ENST00000216336.2	40.1431	58.0543	25.8725	0.383573	0	0.163914
ENST00000216361.9	0.223444	0.717279	0.086415	0	0	0.082412
ENST00000216366.8	0	0	0.190637	0.08251	0	0.090637
ENST00000216367.9	11.4762	13.2419	16.9314	1.21756	1.80383	10.9418
ENST00000216373.9	0.556185	0.508836	0.184291	0.36017	0.447612	0.301081
ENST00000216378.2	1.46285	0.932731	0.273945	0.251816	0.022844	0.619402
ENST00000216392.7	0	0	0	4.25102	25.4513	0.28536
ENST00000216407.4	0.077268	0	0.017882	0.035147	0	0.038519
ENST00000216410.7	0.598136	0.604811	0.372502	0.377342	0	0.556407
ENST00000216414.12	9.48127	0	7.08733	0	5.15939	23.5194
ENST00000216416.8	0.030725	0.031936	0	0.028689	0	0.016169
ENST00000216420.11	0	0.328831	0	0.020368	0	0.058537
ENST00000216442.11	0	0	0.512214	0	0	0
ENST00000216445.7	0.012891	0	0	0	0	0
ENST00000216455.8	2.79555	0.869369	4.64994	0.833577	2.3895	5.97815
ENST00000216456.6	11.2061	8.39916	14.9427	10.7968	8.97073	7.52333
ENST00000216463.8	0.185708	1.75893	1.25451	0.286038	0.325855	0.863657
ENST00000216468.7	6.91022	5.14608	4.6195	8.46109	6.86145	5.32203
ENST00000216471.4	0.097317	0.190884	0.143278	0.026736	0.150176	0.187778
ENST00000216479.7	7.49575	12.2368	10.3326	2.91483	0.49592	5.254
ENST00000216484.6	4.94808	3.65641	1.72332	4.782	5.449	2.91983
ENST00000216487.11	1.91106	0	2.76914	5.85375	3.4529	4.40239
ENST00000216489.7	0	0.78427	0.207948	1.26783	0	1.44042
ENST00000216500.9	0	0.054084	0	0	0	0
ENST00000216513.4	0.006448	0	0	0	0	0
ENST00000216517.10	1.76495	1.26133	1.49522	0.846581	0	0.617937
ENST00000216520.6	106.196	116.628	119.81	95.466	71.6045	90.2304
ENST00000216540.4	0	0	0	0	0.008805	0
ENST00000216554.7	0.020687	0	0	0	0	0.039944
ENST00000216602.10	0	0	0	0	0	0.277486
ENST00000216605.12	48.0753	43.0231	51.8721	15.7411	9.16238	37.265
ENST00000216639.7	30.4445	27.7225	35.3725	19.3542	15.4577	42.3317
ENST00000216658.9	0	0.169335	0	0	0	0
ENST00000216714.7	0	0	0	0	0	23.8994
ENST00000216727.8	5.05492	1.3553	7.33175	6.58369	1.70285	3.20317
ENST00000216733.7	0.319609	0.090655	0	0.718315	0	0
ENST00000216743.6	0.014137	0	0	0	0	0.004408
ENST00000216756.10	0	4.25418	0	4.3874	3.1576	3.59882
ENST00000216774.10	14.0075	11.218	7.7776	10.4631	15.5743	19.5567
ENST00000216780.8	32.7666	19.6943	3.61885	16.5483	1.27743	1.31949
ENST00000216797.9	12.056	13.6063	4.36856	20.7561	37.0753	15.1108
ENST00000216799.8	3.17	5.81709	5.57276	3.71282	1.21211	3.77054
ENST00000216802.9	0	0	0.443153	0	0	0
ENST00000216807.11	0	0.049029	0.362635	0.011713	0.031438	0.172012
ENST00000216832.8	23.4058	16.4701	11.1372	15.2092	9.74433	15.9939
ENST00000216879.8	1.31925	1.04518	0.221515	0.661124	0.486478	0.721541
ENST00000216923.4	1.98035	0.556946	0	0.967204	0.727711	0.335735
ENST00000216951.7	0.160118	0	0	0	0	0.027991
ENST00000216962.8	15.9573	12.2534	12.4518	21.4113	21.8595	14.1103
ENST00000216968.4	0.345461	0.136463	0.643086	0.091713	0.067419	0.545602
ENST00000217026.4	4.16816	2.14493	8.21546	1.8582	0.953236	5.78923
ENST00000217043.2	0.029112	0	0	0	0	0
ENST00000217073.6	0.072989	0	0	0.118141	0	0
ENST00000217074.8	2.41839	0.962042	0.64614	0.688476	0	0.307195
ENST00000217086.8	0.009615	0.021535	0.011206	0.013924	0	0
ENST00000217109.8	0	0.194711	0.092577	0.067812	0.100749	0.027281
ENST00000217121.9	0	0	0	0.388099	0	0
ENST00000217131.5	19.5459	19.3576	13.666	20.909	18.8349	11.5076
ENST00000217133.1	65.5802	71.0971	90.4368	182.679	361.33	170.414
ENST00000217159.5	0	0.161543	0.441972	0	0	0.930526
ENST00000217162.5	0.656589	0.864375	0.344858	0.369578	0.528756	0.14836
ENST00000217169.7	0	0.209136	0	0	0	0
ENST00000217173.6	4.24461	3.93687	2.08382	4.0122	4.22945	2.48404
ENST00000217185.3	0	0.051261	0.078036	0.015441	0.071752	0.005474
ENST00000217188.1	0	0.020925	0	0	0	0
ENST00000217195.12	9.1049	8.87792	5.95315	0.552059	1.60461	2.39603
ENST00000217233.7	3.72148	1.70219	0.596157	6.76756	4.69127	1.44537
ENST00000217260.8	0.028358	0	0.033489	0.02455	0	0
ENST00000217289.8	0	0	0.060524	0	0	0.112514
ENST00000217315.9	0.109078	0	0	0.286841	0	1.14255
ENST00000217320.7	0.031763	0.166971	0	0	0	0
ENST00000217381.2	0.262668	0.605346	1.22486	0.149225	0.269123	0.733849
ENST00000217386.2	0.346702	0.276158	0.315457	0	0	0.048373
ENST00000217398.3	6.42703	9.21641	9.3687	7.57571	8.64411	7.23061
ENST00000217402.2	37.0145	35.2516	32.8066	44.721	35.7967	44.2458
ENST00000217407.2	0	0.016105	0	0	0	0.006059
ENST00000217420.1	0.044761	0.012226	0	0	0	0
ENST00000217426.6	31.4918	36.1644	87.6465	10.8017	9.9193	45.4059
ENST00000217446.7	0.592978	1.54948	1.4565	0	0.587863	0.638811
ENST00000217455.8	10.945	12.4462	10.5335	17.8762	18.1593	14.5186
ENST00000217456.2	21.0764	17.0733	4.84161	45.204	34.8804	15.4015
ENST00000217515.10	0.024416	0.013859	0	0.004057	0	0.010208
ENST00000217652.7	0.617521	0.847201	4.21484	1.02019	1.76259	3.08177
ENST00000217740.3	1.21765	1.33898	0.281226	0.246883	0.169263	0.262752
ENST00000217800.9	0.323774	0	1.04959	0.262784	0.85167	0.813335
ENST00000217890.10	3.12394	4.60783	1.1034	1.9448	1.69365	2.15383
ENST00000217893.9	48.359	46.1325	39.6123	38.3177	39.8704	35.987
ENST00000217901.9	38.2523	27.585	36.1269	26.9131	22.2822	35.4253
ENST00000217909.7	0	0.698792	0.900214	0.09556	0.667536	0
ENST00000217926.5	0	0	0	0	0	0.040599
ENST00000217957.9	0.198441	0.420202	0.241287	0.068575	0	0.036637
ENST00000217958.7	0	0.153907	0.084332	0.160079	0	0.074044
ENST00000217961.4	0.064339	0.153369	0.108042	0.048103	0.038354	0.113714
ENST00000217964.11	0	0	0	0	0.159177	0.294572
ENST00000217971.7	37.8509	39.1001	43.7198	37.562	37.2903	38.7759
ENST00000218006.2	0	0.008444	0	0	0	0
ENST00000218032.6	0.076447	0.160167	0	0	0	0
ENST00000218056.9	10.9698	9.05852	8.26913	17.9214	17.2069	10.4366
ENST00000218089.13	0.581403	0.173012	0.083047	0.351636	0.480526	0.360286
ENST00000218104.5	2.94773	2.6499	2.74395	3.24555	4.28975	2.36984
ENST00000218147.11	3.08787	2.03491	1.70068	2.20207	1.78881	1.55439
ENST00000218176.3	0.189515	0.247055	0.030789	0.033558	0.032278	0.005311
ENST00000218224.8	0	0	0.385175	0	0	0
ENST00000218230.5	0.743819	1.52374	0.980325	2.4791	4.28516	1.47904
ENST00000218249.7	0.32825	0.105306	0.101958	0	0	0
ENST00000218328.12	5.1226	3.4373	3.05983	1.71601	1.91321	2.86112
ENST00000218340.3	13.4175	12.6898	11.2733	9.87767	10.6491	11.6759
ENST00000218348.7	43.3543	34.6637	16.4559	22.2535	17.6706	12.6781
ENST00000218364.4	6.68372	0	11.8882	13.2812	12.3046	16.9063
ENST00000218388.8	403.471	391.292	273.489	425.608	459.705	275.794
ENST00000218432.9	0	0	0	0.238264	0	0
ENST00000218439.8	142.256	106.87	72.6766	201.051	230.646	103.016
ENST00000218516.3	61.8904	61.0823	67.6721	77.6032	100.793	72.9402
ENST00000218548.10	0.071781	0.092428	0	0.039947	0.024015	0.006323
ENST00000218652.11	0.080273	0.075773	0.006435	0.020112	0	0
ENST00000218721.1	0.062764	0.128573	0	0	0	0.009675
ENST00000218758.9	0	0	0	0.807812	0	0
ENST00000218981.5	0	0	0.050734	0	0	0
ENST00000219066.5	21.1677	17.8839	15.9239	7.40205	3.3727	10.918
ENST00000219069.5	0.397276	0.458121	0.562634	0.521705	0.640893	0.523695
ENST00000219070.8	0.252615	0.225737	0.026748	0.007275	0	0
ENST00000219091.8	1.62184	1.48442	1.18072	0.841186	0	0
ENST00000219097.6	1.08341	1.44875	0	0	0.119782	0.203507
ENST00000219139.7	0.069963	0.242575	0.042458	0.084616	0.126878	0.222766
ENST00000219150.9	0	0.804819	0.069457	1.11773	0.073806	0.852587
ENST00000219168.8	0.400857	0.290608	0	0.87257	0.67106	0.194547
ENST00000219169.8	0	0	0.104491	0	0	0.052501
ENST00000219204.7	2.27107	2.40256	2.12987	2.73959	1.5492	2.47666
ENST00000219207.9	0	0.030051	0	0	0	0
ENST00000219235.4	0.130257	0.138664	0.123476	0.042071	0	0.014551
ENST00000219240.8	2.56995	2.45206	2.89299	1.19836	0.539819	1.75711
ENST00000219252.9	9.58608	9.16244	12.7157	9.79708	9.04468	11.1451
ENST00000219255.3	0.208274	0.280773	0	0.323599	0.233439	0
ENST00000219271.3	0.197911	0.125315	0.108516	0	0	0.005547
ENST00000219281.7	0	0.05381	0	0	0	0.112393
ENST00000219299.8	0.232555	0.182272	0.02986	0.081635	0	0.050638
ENST00000219313.8	0.373241	0	0	1.31108	1.67338	2.82187
ENST00000219315.8	2.44177	1.7501	1.67379	0	0.985268	1.05458
ENST00000219320.8	0	0	0	0.106793	0	0
ENST00000219334.9	0	0	0.009383	0	0	0.002158
ENST00000219343.10	0.363887	0.407435	0	0.356669	0	0.392247
ENST00000219400.7	0.47735	0.334168	0.075159	0.054572	0.052922	0.089399
ENST00000219406.10	0.113757	0	0	0	0	0
ENST00000219409.7	0	0.111011	0	0	0	0
ENST00000219431.4	0.421902	1.27304	0.348693	0	0	1.121
ENST00000219439.8	1.73838	1.66058	1.60253	2.0212	2.8492	2.04829
ENST00000219454.9	4.01106	5.78381	8.08735	11.3795	16.8752	21.8411
ENST00000219473.11	0	0	0.038224	0	0	0.024868
ENST00000219476.8	0	0.17802	0.015851	0	0	0.040161
ENST00000219478.10	0.292053	0.206587	0	0	0	0.03286
ENST00000219479.6	0	0	0	0	1.33059	4.27476
ENST00000219535.7	6.2383	3.95428	2.46395	4.89936	3.2303	8.52301
ENST00000219542.3	0.10717	0.9482	0.946101	0.723831	0.229484	0.505989
ENST00000219548.8	0	0	0.591117	0	0.359587	0
ENST00000219596.5	0	0	0	0.053809	0.169281	0.080438
ENST00000219611.6	2.88107	2.46297	2.17696	2.10479	1.99918	1.5791
ENST00000219689.11	0.076773	0.05971	0.189202	0.05378	0.124775	0.149397
ENST00000219771.7	0.279147	0.54318	0.120244	0.705515	0.271972	0.458052
ENST00000219782.10	0.866255	0.281111	0.807948	0.065425	0.934018	0.361356
ENST00000219789.10	0	0	0	0	0.12652	0
ENST00000219797.8	42.5472	35.826	27.273	34.2979	26.3948	20.8066
ENST00000219821.9	106.014	80.1403	39.815	121.796	64.9619	73.158
ENST00000219837.11	0.639511	0.566912	0.131959	0.269166	0.119984	0.172883
ENST00000219905.11	1e-06	0	0	0	0	0
ENST00000219919.8	0	0	0	0.058022	0	0
ENST00000220003.13	15.2877	17.418	12.605	16.0791	16.578	18.1826
ENST00000220058.8	0.788622	0.505216	0	0	0	0.086526
ENST00000220244.7	0.005928	0.017293	0	0.006851	0.009885	0.00488
ENST00000220325.8	2.41106	2.32188	3.34217	2.26909	1.84864	2.65417
ENST00000220429.12	0.100526	0	0.059809	0	0.012619	0.019862
ENST00000220478.7	0.015888	0.009469	0	0	0	0.006611
ENST00000220496.8	0.046422	0.108034	0	0	0.023669	0
ENST00000220507.4	0.022656	0	0.05061	0.098067	0	0
ENST00000220509.9	10.4924	8.10869	6.55969	7.03416	7.51211	5.98027
ENST00000220514.7	5.7223	14.5828	19.6889	4.33434	4.51346	12.8494
ENST00000220531.7	0.366909	0	0	0	0.730126	0.160135
ENST00000220562.8	0.890503	0.526988	0.67485	0.500418	0.385796	0.477848
ENST00000220592.9	0.372005	0.407076	0.242118	0.086156	0.313783	0.078803
ENST00000220597.4	0.990155	0.744438	0.380204	0.713989	0.917834	0.435763
ENST00000220659.10	2.57468	2.04904	2.63238	1.92091	1.20845	0.809765
ENST00000220669.9	0	0.121221	0.041125	0.025074	0	0
ENST00000220751.4	1.9223	1.13795	1.2457	1.45688	1.16575	1.13445
ENST00000220763.9	15.5338	13.675	9.92027	8.76793	9.6629	6.66211
ENST00000220764.6	38.7671	45.2052	47.9383	24.75	33.559	72.2793
ENST00000220772.7	0	0.006972	0	0	0	0
ENST00000220822.11	0.065118	0.025637	0.021827	0	0.00669	0
ENST00000220847.8	4.62124	2.38972	3.84203	1.87076	5.56552	6.04788
ENST00000220849.9	7.50085	38.5695	12.8447	10.9202	21.7963	41.9124
ENST00000220853.7	0	0.632029	0	0.583769	0	0.163049
ENST00000220856.6	0	0.026458	0	0	0	0
ENST00000220913.9	3.18103	2.85358	4.27069	2.34659	1.29815	1.89724
ENST00000220959.8	1.02113	2.91669	1.41323	0.836319	0.461289	0.430374
ENST00000221086.7	0.134493	0.054163	0.057167	0.067846	0.138129	0.098398
ENST00000221114.7	0	0	0	0	0	0.115067
ENST00000221130.10	1.05669	0.682241	0.148521	1.64752	1.45452	1.46999
ENST00000221132.7	1.85043	2.38823	1.43952	0.513815	1.32062	1.17731
ENST00000221138.8	20.8304	14.8407	13.2762	22.4448	21.6165	17.8466
ENST00000221166.9	0	0	0	0	0.004456	0
ENST00000221200.8	0.133127	0.020516	0.061443	0	0.030245	0
ENST00000221232.10	0	0	0	3.37329	0	0
ENST00000221233.8	24.164	28.4576	21.42	2.88676	3.73995	6.98311
ENST00000221249.10	0.950389	1.38765	1.84805	0.882295	0	0.220837
ENST00000221264.8	0	0.229373	0	0.153336	0	0.233705
ENST00000221265.7	23.7472	16.4293	20.9813	22.1464	17.2353	19.4997
ENST00000221283.9	101.013	107.786	24.2565	171.887	160.046	85.2168
ENST00000221307.12	0.274721	0.106304	0.104759	0.054767	0.146337	0.036804
ENST00000221315.9	0.083579	0.768168	0.325623	0.423582	0.668847	0.293577
ENST00000221355.10	0.938059	1.03592	0.827776	1.23624	0.511933	0.539296
ENST00000221399.7	0.035581	0.126263	0.049173	0	0.127861	0.033931
ENST00000221403.6	0	0	0.419277	0	0	0.300443
ENST00000221413.10	45.9368	48.8658	54.9668	11.4813	5.58196	29.2471
ENST00000221418.8	88.7636	87.216	79.775	72.0303	80.1577	53.2169
ENST00000221419.9	37.0642	34.9903	30.4	21.464	24.0855	27.4035
ENST00000221444.1	0.049485	0.19901	0.04318	0.066464	0.059397	0.069744
ENST00000221448.9	11.5541	7.39644	7.01418	6.83349	7.41344	8.43867
ENST00000221459.6	0.598795	0.425619	0	2.16456	3.0354	0.484333
ENST00000221462.8	1.37942	1.31126	1.49719	1.30715	1.27272	1.0303
ENST00000221466.9	0	0	0	0	0	0.209615
ENST00000221476.3	1.01915	1.094	0.958864	1.36313	0.754059	0.776651
ENST00000221480.5	1.50712	1.41568	0.985359	0.895268	0.964153	0.604089
ENST00000221485.7	0.299749	0.059797	0.070725	0.396785	0.579951	0.010952
ENST00000221486.5	2.62534	3.24587	1.00196	1.57417	0.826267	0.842846
ENST00000221494.9	20.7224	19.6936	18.1504	24.8103	19.6852	20.3336
ENST00000221496.4	0	0.056843	0.075735	0	0.222496	0.039195
ENST00000221504.12	0	0	0.499801	0	0	0.054827
ENST00000221515.5	1.66307	3.32424	0.426585	3.27947	1.59378	0.065877
ENST00000221543.9	1.11305	1.76897	2.68297	3.04728	5.73822	2.54122
ENST00000221554.12	3.69513	0	0	0	0	0.390554
ENST00000221561.12	0	0.330336	0	0.112059	0.2396	0
ENST00000221566.6	12.0149	9.11032	12.004	9.0775	8.07934	10.2539
ENST00000221573.10	2.92943	2.49575	2.79834	2.37328	2.89372	2.55635
ENST00000221576.4	0	0	0	0	0	1.2471
ENST00000221665.4	1.81663	1.47729	1.84786	0.902993	1.01838	1.00684
ENST00000221671.7	0	0.188013	0	0	0	0.113214
ENST00000221770.7	0.04828	0.079531	0.064884	0	0	0.009734
ENST00000221784.8	17.2191	14.2166	23.5984	15.2489	16.2485	13.4834
ENST00000221801.7	14.094	18.0299	9.3168	15.6621	5.25036	27.4111
ENST00000221804.4	55.0155	42.4106	21.0798	1.84432	0.205439	0.154537
ENST00000221818.5	0	0	0	0.093706	0.223075	0.06674
ENST00000221847.5	0.065639	0.053787	0.029325	0.042617	0	0.010118
ENST00000221855.7	0.810351	0.793185	0.703773	0	0.626985	0.836461
ENST00000221856.10	0.241601	0	0	0	0	0
ENST00000221859.8	0.888523	0.400406	0.758602	0.418069	0.805292	0.394763
ENST00000221891.8	0	0.21443	0	0.24934	0	0
ENST00000221922.10	3.19839	3.75981	1.28882	3.32235	3.84391	1.5769
ENST00000221930.5	229.126	182.394	189.665	429.111	442.903	261.993
ENST00000221972.7	0	0.630463	0.552143	0.160483	0	0.100698
ENST00000221975.6	162.276	164.416	586.924	100.929	55.5382	397.966
ENST00000221978.9	11.6991	15.3715	4.07995	0.827863	0.262189	0
ENST00000221980.4	3.81549	1.89579	1.81712	3.61394	3.4277	1.58185
ENST00000221992.10	0.190737	0.12448	0.02697	0	0	0
ENST00000221996.11	0.076249	0	0	0	0	0
ENST00000222002.3	0.607655	0.410574	0.049939	0.012404	0	0
ENST00000222005.6	3.1652	1.05221	0	0.368066	0.30595	0.488442
ENST00000222008.10	79.3732	62.6874	34.6584	111.194	104.619	71.841
ENST00000222032.9	0	0.254899	0.859068	1.82993	0	0
ENST00000222120.7	0.561379	0.549276	0.100217	0.180208	0.163873	0.130079
ENST00000222122.9	0.077603	0	0.497836	0.18779	0.121317	0
ENST00000222139.10	0	0.06296	0	0	0	0
ENST00000222145.8	0.162125	0.113869	0.274207	0.175439	0	0.195757
ENST00000222190.9	94.2873	145.269	155.655	84.0367	123.739	89.2554
ENST00000222214.9	0.884408	0	0.544018	0.923248	0	0
ENST00000222219.7	5.0934	7.90687	3.47722	4.68738	5.90932	1.66394
ENST00000222224.3	0	0	0	0	0	0.012167
ENST00000222247.9	129.737	111.559	127.678	63.2915	27.2595	136.167
ENST00000222248.3	0.420367	0.306249	0.04333	0.066893	0.089985	0.081224
ENST00000222249.13	0.046507	0.12146	0.038958	0.083978	0.27574	0.029031
ENST00000222250.4	0	0	0.443046	0	0	0.086978
ENST00000222256.8	0.290926	0.22892	0.122905	0.258474	0.244791	0.730121
ENST00000222266.2	48.4041	47.6915	52.7434	43.2205	41.975	41.1723
ENST00000222275.2	0	0	0.196147	0.454264	0.326323	0.023227
ENST00000222284.9	27.5678	32.2591	39.5159	16.2776	22.4732	38.6869
ENST00000222286.8	0.182057	0.127869	0.023239	0.112576	0.146179	0.080179
ENST00000222304.4	0.203785	0	0	0	0.31816	0
ENST00000222305.7	0	2.90195	0	0	1.71478	0
ENST00000222308.8	49.0111	40.3936	32.2544	97.5911	115.808	56.1131
ENST00000222329.8	0.055967	0	0	0.216645	0	0.04376
ENST00000222339.7	1.1873	0.688854	0.381172	0.477114	0.161903	0.170917
ENST00000222345.10	2.35132	0.984147	1.33838	1.65381	0.525843	1.24777
ENST00000222374.2	0.106018	0.130308	0.213143	0.030593	0.140692	0.021789
ENST00000222381.7	0	0.013474	0	0	0	0.028032
ENST00000222388.6	24.9349	21.423	27.6867	16.8457	13.4711	21.414
ENST00000222402.7	0.03585	0.083065	0	0.072836	0.006132	0.039046
ENST00000222481.8	0	0	0.012689	0	0	0
ENST00000222482.8	0	0.311994	0.081593	0	0	0
ENST00000222543.9	0.021153	0	0.182642	0.078281	0.824819	0.256905
ENST00000222547.7	13.3526	13.6151	4.79557	10.5878	13.2469	10.0725
ENST00000222553.7	0.761534	0.540856	0.315079	0.390426	0.602116	0.816588
ENST00000222567.5	8.03745	7.85725	5.28058	2.70904	1.85193	4.08938
ENST00000222573.4	0.10572	0.021653	0.021474	0.06188	0.018442	0.007118
ENST00000222574.8	2.27509	0.921994	0	1.50377	0.068401	0.482396
ENST00000222584.7	4.43349	4.194	2.70009	1.75191	1.8075	1.9612
ENST00000222597.6	10.1847	15.2854	8.97008	6.13805	7.85807	4.93101
ENST00000222644.9	0.067871	0.02991	0	0	0	0.013135
ENST00000222673.5	0	0	0	0.012677	0	0.107504
ENST00000222690.10	0.201261	0.181405	0.025578	0.079037	0.259466	0.078898
ENST00000222693.4	0.270938	0.031918	0	0.049871	0.108894	0.113229
ENST00000222725.9	0.052778	0.085756	0.029534	0.168962	0	0.114873
ENST00000222726.3	0.088001	0.095561	0	0	0.152944	0.007191
ENST00000222728.3	0	0.12419	0	0	0	0
ENST00000222753.5	0	0.012443	0.006784	0	0	0
ENST00000222792.10	0.050673	0.043092	0	0.023473	0	0.044068
ENST00000222800.7	0	0	0	1.5224	1.80312	2.31638
ENST00000222803.9	0.25629	0.188299	0.062126	0.088531	0.206225	0.20308
ENST00000222812.7	0	0	0	0	0.199505	0
ENST00000222823.8	1.14227	1.38258	0.908723	0.586629	0.171722	0.378911
ENST00000222902.6	0.068665	0.168796	0	0.17833	0.160806	0
ENST00000222969.9	7.49231	12.3135	4.92497	6.88045	6.42319	7.004
ENST00000222982.8	0	0	0.015791	0	0	0
ENST00000222990.7	0.281828	0.203586	0.374587	0.496096	0.288914	0.407753
ENST00000223023.4	1.40477	0.96042	0.45049	1.25727	1.36886	0.967102
ENST00000223026.8	0.194052	0.178931	0	0.050868	0	0.011639
ENST00000223029.7	52.7147	37.9398	62.066	26.3979	8.65709	34.9135
ENST00000223051.7	33.177	35.3509	17.1863	12.8467	11.8133	8.26119
ENST00000223054.8	0	1.44655	0	1.94584	1.15734	2.74261
ENST00000223061.5	0	0	0.131823	0	0	0.023951
ENST00000223073.6	0.341617	0.276875	0.135742	0.200972	0.13283	0.177566
ENST00000223084.7	0	0.810487	0.137038	0.515986	0	2.01525
ENST00000223095.4	7.74641	4.36317	2.89385	19.11	34.868	7.65306
ENST00000223114.8	0.247396	0.134997	0	0	0	0
ENST00000223127.7	8.09979	6.75679	5.24243	5.25273	3.97185	3.84063
ENST00000223129.8	0.026528	0.12749	0	0	0.148754	0.037974
ENST00000223136.4	85.7422	75.6843	50.4112	69.3325	75.5636	68.2516
ENST00000223145.9	0.613782	0.678544	0.397104	0.307349	0.990809	0.413026
ENST00000223167.4	0.252765	0	0.017761	0.016889	0	0.100289
ENST00000223190.8	8.24018	8.75154	8.74362	5.26829	5.12985	5.91307
ENST00000223208.9	0.009566	0.009416	0.03373	0.014332	0	0
ENST00000223210.4	0.466294	0.408615	0.207445	0.450122	0.409643	0.204616
ENST00000223215.9	46.0881	9.94361	12.67	72.5213	16.9475	16.9613
ENST00000223273.6	5.48286	7.9057	6.04344	2.72802	4.08025	7.25054
ENST00000223293.9	6.80249	6.69674	4.55177	1.77314	1.96369	4.57496
ENST00000223321.8	64.0337	67.2113	97.8608	74.3635	68.7012	118.738
ENST00000223324.2	42.66	34.7098	46.7872	29.4655	27.3499	45.2067
ENST00000223336.10	7.35822	1.42732	6.4801	10.7789	4.35575	10.2061
ENST00000223357.7	3.31423	5.93692	1.05087	0.47053	1.2641	0.268675
ENST00000223361.7	0	0.144448	0.316598	0	0	0
ENST00000223368.6	0.099876	0.214751	0	0.376751	0.035447	0.113842
ENST00000223369.2	0.694314	1.06071	1.64096	1.16742	1.66513	1.21302
ENST00000223423.8	0	0	0	0	0.570198	0
ENST00000223428.8	0.940962	0.721699	0.444911	0.470056	0	0.583693
ENST00000223459.10	0.569885	2.16853	0.350162	0.79918	1.04124	0.941862
ENST00000223500.8	45.8689	44.3142	34.3977	50.8885	49.2055	42.4015
ENST00000223517.9	0	0	0.237692	0	0	0
ENST00000223528.6	0.023223	0	0	0	0	0
ENST00000223641.4	217.023	209.227	288.757	242.676	165.349	314.812
ENST00000223642.2	0.615911	0.659137	0.561742	0.52778	0.422054	0.463817
ENST00000223795.2	0.141611	0.184192	0	0	0	0
ENST00000223836.10	0	0	0	0	0	0.086925
ENST00000223862.1	0	0	0	0.13763	0	0
ENST00000223864.6	17.9455	21.3828	19.3202	18.0952	20.6178	25.3103
ENST00000223865.8	0.028141	0	0	0	0	0
ENST00000224073.5	264.227	216.626	222.978	266.425	214.906	241.834
ENST00000224140.5	10.7451	7.0732	4.57	6.50469	6.07014	5.62927
ENST00000224181.3	0	0	0	0	0	0.113377
ENST00000224237.9	126.137	161.028	129.065	36.7916	31.3226	49.6685
ENST00000224784.10	1.2555	1.60688	1.83327	0.993863	1.52284	1.05053
ENST00000224807.9	4.67425	2.55412	1.21459	3.81489	3.73814	2.32174
ENST00000224949.8	20.6254	20.2099	29.1249	20.5218	15.1163	26.3646
ENST00000224950.7	2.24628	4.06525	0	0	0	2.13156
ENST00000225171.6	0	0	1.00274	0	1.79789	0.11937
ENST00000225174.7	20.4663	15.0282	18.5209	13.0677	20.0969	14.3709
ENST00000225235.4	1.01582	0.571983	0.465936	0.724154	0.407478	0.267755
ENST00000225275.3	225.415	308.058	78.2751	0.717081	0.271071	0.617274
ENST00000225296.7	0.576681	0.60632	0.732601	0.582107	0.560801	0.88028
ENST00000225298.11	25.7596	27.1907	30.2324	16.3338	14.2443	29.1752
ENST00000225328.9	0	0.172534	0	0	0	0
ENST00000225371.5	14.7681	16.5401	4.60117	0.503084	0	0.034957
ENST00000225388.8	5.18736	5.39733	5.29092	4.13669	4.85549	5.42592
ENST00000225430.8	343.987	216.162	141.725	234.269	132.769	444.039
ENST00000225519.3	6.21967	4.80483	4.42338	4.18772	3.96346	3.43668
ENST00000225525.3	20.5017	19.4731	16.1218	26.1503	41.5846	23.2124
ENST00000225538.3	87.9501	75.0414	53.0031	143.466	190.918	74.8114
ENST00000225567.9	0.46755	0	0	0.06693	0.388599	0.09893
ENST00000225573.5	0.345887	0.16911	0.113189	0	0	0.072708
ENST00000225576.7	0.436705	0.622257	0.436116	0.474054	0.757334	0.423942
ENST00000225577.8	0.057111	0	0	0	0	0.007182
ENST00000225603.8	4.34659	4.56065	5.09163	3.32788	2.72816	4.80711
ENST00000225609.9	1.02477	0.211838	0.225191	0	1.19426	0.361853
ENST00000225614.6	21.4738	17.8209	21.1791	12.6245	8.83178	18.3366
ENST00000225648.3	0.069844	0.190811	0	0	0	0.02164
ENST00000225655.5	447.368	566.382	777.379	463.07	555.924	837.486
ENST00000225665.11	0.934073	1.01171	1.06335	1.24561	0.079575	0.439032
ENST00000225688.3	0	0.199337	0.262373	0	0	0
ENST00000225696.8	7.80339	7.90996	14.0964	8.10964	1.58116	11.4688
ENST00000225698.8	70.6813	68.7115	108.002	26.598	22.4541	70.2674
ENST00000225719.8	1.19087	0.773768	0.535868	1.03484	0.887999	0.428574
ENST00000225724.9	0.450128	0.392363	0.164409	0.219514	0.068629	0.171825
ENST00000225726.9	0.554427	0.18649	0.058699	0.229662	0.136561	0.107823
ENST00000225729.7	0	4.30533	14.6622	2.77309	0	0
ENST00000225737.10	0.751711	0.686407	0.470796	0.728446	0.344037	0.359987
ENST00000225742.13	48.776	46.2926	28.826	32.0757	28.9216	22.9052
ENST00000225760.5	0	0	0	0.021698	0	0.03065
ENST00000225792.9	0	0.220318	0.131538	0.049009	0	0
ENST00000225805.8	2.03003	1.33081	0.264051	0.192003	0.165014	0.228964
ENST00000225831.4	15.1772	11.983	2.35884	18.6927	2.07327	0
ENST00000225842.3	0.134892	0.110532	0.060265	0.145969	0	0
ENST00000225844.6	0.970087	14.384	1.25893	1.95954	0.887095	0.156652
ENST00000225873.8	0.204064	0.254796	0.122834	0.134406	0.028763	0.161561
ENST00000225916.9	1.32488	1.34781	4.35566	0.790931	0.263278	1.92881
ENST00000225927.6	5.27646	5.58253	3.58046	5.34077	4.88867	4.8431
ENST00000225929.5	0	0.04502	0	0	0	0.138623
ENST00000225964.9	0	0.032518	0.040487	0.002454	0	0.026374
ENST00000225969.8	53.3418	54.7062	101.574	35.6776	43.2267	90.4506
ENST00000225972.7	47.2312	47.4654	77.8389	45.0353	42.8424	78.6162
ENST00000225983.10	2.75969	2.62086	2.04673	0.829041	2.44784	0.563878
ENST00000226004.7	0.686761	1.0235	1.20844	1.64012	1.46114	1.45682
ENST00000226067.9	0.073408	0.006701	0.012298	0	0	0
ENST00000226091.2	0.011892	0.009745	0.005313	0.025738	0	0
ENST00000226094.9	0.010435	0	0	0	0	0
ENST00000226105.10	8.27662	9.02423	12.166	12.1196	5.66104	19.5671
ENST00000226207.5	0	0.017236	0	0	0	0
ENST00000226225.6	0.237449	0.034371	0.050806	0.136183	0.125764	0.230415
ENST00000226230.7	0.213567	0.434439	0.140371	0.010522	0.059324	0.386176
ENST00000226279.7	0.138677	0.084557	0.093603	0.019819	0.078536	0.025093
ENST00000226299.8	0.211339	0	0	0	0	0.064024
ENST00000226317.9	0.094899	0.053577	0	0.92005	0.246076	0.253207
ENST00000226319.10	0.014802	0.116077	0	0.015151	0	0
ENST00000226328.8	0	0.020918	0	0	0.00666	0
ENST00000226359.2	0	0	0.044999	0	0	0
ENST00000226382.3	0	0	0	0.021897	0	0
ENST00000226444.3	0.121004	0.109756	0	0	0	0
ENST00000226522.8	13.6252	14.3638	3.33086	20.4137	14.8093	22.3683
ENST00000226524.3	87.0401	62.1074	78.8672	344.194	415.991	111.818
ENST00000226574.8	0	0	0.111032	0.024854	0	0.214239
ENST00000226725.10	0	0.036473	0	0.386913	0.352201	0.480806
ENST00000226796.6	17.9614	19.1453	6.50049	4.7607	4.06668	9.19143
ENST00000226798.8	46.9891	33.6749	39.8265	33.9658	27.2111	53.6128
ENST00000227135.6	2.89041	3.22522	3.95292	1.82028	1.7483	5.41553
ENST00000227155.8	0.456967	0.862426	0	0.328354	0.146554	0.492567
ENST00000227157.8	0	0	0.018553	0	0	0
ENST00000227163.8	69.7264	63.2095	30.4249	18.6784	9.53861	9.24586
ENST00000227214.10	0	0	0	0	0	0.010408
ENST00000227266.9	68.7057	103.056	115.479	65.0424	61.5639	112.67
ENST00000227322.7	0.186882	0.284286	0.0306	0.351537	0.182453	0.082158
ENST00000227349.6	0	0	0	0.031628	0	0.0241
ENST00000227378.7	0	0.775923	0	0	0	0.897973
ENST00000227471.6	4.38768	4.26492	2.70319	1.92936	2.41343	0.969073
ENST00000227507.2	0.051888	0.054646	0.017339	0.033959	0.018235	0.151239
ENST00000227520.9	13.3024	11.885	15.0254	4.10021	2.96738	10.8171
ENST00000227524.8	113.363	121.37	106.56	57.5385	52.2197	61.4501
ENST00000227525.7	26.0161	26.3881	12.8049	14.7025	12.8885	30.1851
ENST00000227618.8	0	0	0	0	0	4.70145
ENST00000227638.7	10.4631	12.4118	17.7447	23.3765	40.3736	24.9674
ENST00000227752.7	0	0.085589	0	0.128779	0	0.018883
ENST00000227756.4	0	0.100573	0.013709	0	0	0
ENST00000227868.8	6.83454	7.69456	6.76417	3.81126	3.64751	5.26481
ENST00000227880.7	1.17753	0.936991	0	0.842692	0.383669	0
ENST00000228027.11	0	0	0.09798	0	0	0
ENST00000228136.8	3.43842	7.15036	3.14811	4.74135	6.18935	8.00704
ENST00000228140.6	347.09	374.187	761.591	179.834	94.1607	587.023
ENST00000228251.8	15.5809	11.8997	8.3087	8.70213	8.67878	8.56898
ENST00000228280.9	0	0	0.273453	0.01019	0.28668	0.297553
ENST00000228284.7	0.350671	0	0.242494	0	0.338129	0.129189
ENST00000228289.9	0.870224	0	0.67052	0.821277	0	0.693932
ENST00000228306.8	43.278	0	67.4388	0	0	0
ENST00000228347.8	4.14256	3.25894	1.86349	1.50651	1.44997	2.17195
ENST00000228425.10	0.166541	0.429168	0.232131	0.111289	0	0.261836
ENST00000228434.7	6.37331	4.88647	9.4435	17.1161	23.006	24.4913
ENST00000228437.9	0.437789	0.38908	0.469492	0.68604	0.034358	0.085734
ENST00000228438.2	8.00377	9.38471	7.35768	3.64354	4.31059	8.14091
ENST00000228463.6	63.544	68.9444	40.6195	76.4218	86.3412	35.2057
ENST00000228468.8	0	0	0	0	0.109975	0
ENST00000228495.10	0.08732	0.078477	0	0.022376	0.024824	0.034625
ENST00000228506.7	0.935836	0.747626	0.882443	0.757118	0.476449	1.16024
ENST00000228510.7	0.901715	1.574	0	1.71347	1.08956	3.03498
ENST00000228515.5	0.958429	0.862784	0.631833	1.56914	1.24336	0.82901
ENST00000228534.5	0.037337	0	0	0.11313	0	0
ENST00000228641.3	0	0.065003	0	0	0	0
ENST00000228682.6	0.074164	0	0	0	0	0
ENST00000228705.6	0.628355	0.641177	0.988098	0.209808	0.315997	0.332915
ENST00000228740.6	20.7152	24.1125	22.1284	11.8355	11.4564	17.057
ENST00000228741.7	1.24743	1.71841	0.893257	1.20926	1.94129	0.523815
ENST00000228799.6	1.14257	0.042466	0.120536	0.066754	0	0.121963
ENST00000228820.8	0	0	0.120545	0	0	0
ENST00000228825.11	283.143	355.038	382.456	454.961	447.535	565.844
ENST00000228827.7	13.0762	14.824	8.58043	7.15596	5.48419	11.2362
ENST00000228841.12	0	0	0.152638	0	0	0
ENST00000228843.13	0	1.35631	1.88765	0.457639	0	1.5034
ENST00000228862.3	0.555005	0.146673	0.320201	0.456238	0.311095	0.584685
ENST00000228865.2	0.518948	0.668109	0.184154	0.573185	0.501049	0.248006
ENST00000228872.8	18.5911	17.5253	6.18881	26.2674	25.9528	18.8922
ENST00000228918.8	0	0	0.065345	0	0.165007	0.178671
ENST00000228922.11	0	0	0	0	0	0.021952
ENST00000228928.11	1.32304	1.34126	1.18248	0.493048	0.334734	1.0488
ENST00000228936.5	0.064054	0.01334	0.004005	0	0	0.017919
ENST00000228945.8	10.74	11.4478	4.0316	8.34035	23.1187	10.3697
ENST00000228955.11	0	0	0	0.635077	0.693361	0.729188
ENST00000229030.4	0	0	0.020867	0	0	0
ENST00000229179.8	0.12124	0.168716	0.026274	0.114527	0	0.070549
ENST00000229201.4	10.0142	8.43139	14.6242	2.66338	3.00141	11.012
ENST00000229214.8	0.085747	0.266965	0.084737	0.041532	0.085093	0.073858
ENST00000229238.4	29.8684	23.824	21.0112	26.0018	17.8864	31.7204
ENST00000229239.9	0.099257	0	0.286826	0.08012	0	0.133554
ENST00000229243.6	1.98689	0.967711	0.97322	1.7596	0.923976	0.804884
ENST00000229251.7	0	0	0.144166	0.536102	0	0
ENST00000229264.7	0	0.206619	0	0	0	0
ENST00000229265.10	8.29599	10.6196	4.07522	4.66359	0.557504	10.8131
ENST00000229266.7	0	0	0	0	0	2.13798
ENST00000229268.12	3.63653	0	1.40804	0.945774	0.503625	1.29457
ENST00000229270.8	0	0.039849	0	0	0	0.037025
ENST00000229277.5	0.557482	0	0.516899	0	0	0
ENST00000229281.5	135.012	129.3	165.987	149.973	149.242	162.423
ENST00000229307.8	0.820599	0.971841	0.035584	0.245571	0	0.140533
ENST00000229314.9	0.085489	0.128624	0.006785	0.106113	0	0.104427
ENST00000229328.9	2.40926	2.37812	0.970251	2.88926	1.97794	2.73357
ENST00000229329.6	42.0719	45.3761	41.3436	68.8563	80.6965	68.6707
ENST00000229330.8	0.033463	0.046885	0.104852	0.045381	0.132676	0.123622
ENST00000229332.11	0	0.269678	0	0	0	0
ENST00000229335.10	0.103167	0.079448	0	0	0	0.004342
ENST00000229340.9	0	0	0.025868	0.071541	0	0.076349
ENST00000229379.2	235.49	194.234	223.699	369.211	323.43	495.78
ENST00000229384.5	0	0.392793	0	0	0	0
ENST00000229390.7	88.8571	88.388	135.736	34.7371	34.3326	104.261
ENST00000229395.7	0.784028	0.979634	1.51863	2.24902	2.21768	3.6912
ENST00000229402.3	0	0.043855	0	0	0	0
ENST00000229405.8	0.054303	0.085248	0.073305	0.130012	0.19631	0
ENST00000229416.10	0	0	0	0.480268	0.008754	0.087762
ENST00000229447.9	0	0.009081	0	0	0.018136	0
ENST00000229471.8	0.180444	0.172654	0	0.06059	0.331614	0.016508
ENST00000229554.9	0	0	0	0	0.025444	0
ENST00000229563.5	9.84199	7.1561	2.15773	6.13311	5.22097	4.59764
ENST00000229595.5	16.8611	22.3577	17.121	10.3179	12.8163	10.4422
ENST00000229633.6	102.291	107.64	36.819	33.8915	12.3935	23.4808
ENST00000229634.13	10.5872	9.85068	6.11145	10.9203	15.4592	5.06938
ENST00000229708.3	2.45442	1.66947	0.020546	2.71713	2.18216	0.127249
ENST00000229758.7	6.43968	4.22276	11.6946	2.55724	3.96263	11.6253
ENST00000229769.2	3.06707	3.47691	4.37056	1.48771	1.33491	3.18396
ENST00000229795.7	2.01131	2.7716	1.16596	0.729805	1.00615	1.44802
ENST00000229810.9	124.66	108.261	149.814	66.6151	120.687	105.47
ENST00000229812.7	13.5423	12.2985	10.57	15.463	16.5918	11.8646
ENST00000229854.11	28.5534	17.7661	15.8356	7.99818	6.37787	19.1384
ENST00000229866.10	6.73024	5.12906	5.82557	9.11336	9.22549	9.62084
ENST00000229903.4	1.92751	2.68339	1.53052	1.16387	2.04561	1.64705
ENST00000229955.3	0.203904	0.120461	0.107712	0.01355	0	0.093487
ENST00000229971.2	4.67575	5.13427	4.64022	4.28699	4.63218	4.36434
ENST00000230036.1	0.166395	0.139267	0.034335	0.019002	0	0.029287
ENST00000230048.4	2.92997	3.00136	2.07884	1.75152	1.65651	2.45121
ENST00000230050.3	149.993	173.15	472.463	67.267	35.0677	365.399
ENST00000230056.7	12.9612	11.2856	10.8145	8.77407	1.58686	18.9896
ENST00000230122.3	3.3773	3.46637	1.8241	1.70931	0.901757	2.04062
ENST00000230124.7	10.7488	8.48765	6.75336	8.03065	9.23851	8.55998
ENST00000230340.8	2.06976	3.87178	1.75446	3.27202	1.41516	5.39785
ENST00000230354.10	7.06623	8.6616	6.96469	6.14956	8.27707	8.75432
ENST00000230361.3	0.035029	0.258333	0.14085	0.090975	0.689093	0.032397
ENST00000230381.6	0.012885	0.010558	0	0.033463	0	0.015889
ENST00000230402.10	0	0	1.5962	0	0	0
ENST00000230413.9	21.4538	25.4625	18.0516	4.64865	4.83892	11.1554
ENST00000230419.8	0	0	0	0.366311	0	0
ENST00000230431.10	42.4221	38.6055	39.4958	14.2377	9.66926	17.5688
ENST00000230449.8	13.8129	12.3745	13.2582	11.6287	11.209	12.6703
ENST00000230461.10	1.37811	1.54176	1.34324	2.74116	4.20966	1.89504
ENST00000230480.10	0	0.378034	0	1.82451	2.79822	0.676548
ENST00000230495.2	2.00926	0.273193	2.68065	1.45236	1.87092	0.742654
ENST00000230510.7	0.113153	0.447541	0.281465	0.020705	0	0.083773
ENST00000230565.3	0.396304	0.136088	0.040472	0.045747	0.077788	0
ENST00000230568.4	3.71616	5.49189	0	1.26832	0.805366	0
ENST00000230640.9	0.566189	0.824024	0.41045	0.582609	0.588485	0.674999
ENST00000230732.5	0.016124	0	0	0	0	0
ENST00000230771.8	0	1.29358	0	0	1.40574	0.503897
ENST00000230792.6	0.050853	0.016012	0.224994	0.171033	0.445396	0.133025
ENST00000230859.7	1.28181	0.891154	0.755896	0.859143	0.951209	1.04891
ENST00000230895.10	2.2532	1.50678	1.42602	5.85192	3.98871	2.26587
ENST00000230901.9	2.80574	2.87057	0	0	0	0.427266
ENST00000230914.4	0.063114	0.050978	0	0.00782	0.029178	0.022651
ENST00000230990.6	3.09527	2.1086	5.13185	4.32392	4.72173	6.43217
ENST00000231009.2	0	0	0.022925	0	0	0
ENST00000231021.8	0.013949	0	0	0.030104	0.14578	0
ENST00000231061.8	0	0	0	0	0	0.045679
ENST00000231134.7	0	0	0.035144	0	0	0
ENST00000231188.9	0.09595	0.088255	0.050319	0.035458	0.020252	0.046878
ENST00000231198.11	0.860675	1.34784	1.08618	0.171028	0.257621	0.472412
ENST00000231228.2	0.028751	0	0.037258	0	0	0.00857
ENST00000231238.9	32.5502	26.819	9.645	28.832	11.3524	31.0798
ENST00000231368.9	0.558098	0.630294	0.123502	0.400842	0.411717	0.23222
ENST00000231383.8	0	0	0	0.026602	0	0
ENST00000231449.6	0	0.053006	0	0	0	0
ENST00000231454.5	0	0.039536	0	0	0	0
ENST00000231461.9	2.65108	3.66568	2.14658	2.39142	2.98988	2.23266
ENST00000231484.3	0.941598	0.585813	0.155805	0.810107	0.511803	0.274153
ENST00000231498.7	0.665483	0.775451	0.144639	0.28252	0.208846	0.234
ENST00000231504.5	26.5985	1.84105	20.4067	24.4788	33.3673	16.9849
ENST00000231509.7	0.702285	1.25202	0.200242	1.22668	0.784755	0.92023
ENST00000231512.4	5.55269	5.70988	4.65796	4.48216	4.99505	6.13761
ENST00000231524.13	0.70618	0.184396	0.188565	0.492489	0.769581	0.278953
ENST00000231572.7	21.0486	20.06	32.8052	18.5314	17.0862	23.95
ENST00000231668.13	0.119658	0.277838	0.324625	0	0.864766	0.606276
ENST00000231683.3	0.551927	0	0	0.062554	0	0
ENST00000231706.5	0.042686	0.118906	0.093579	0.014798	0	0.010577
ENST00000231721.6	0.009902	0.045921	0.243844	0.030375	0	0.263203
ENST00000231749.7	0.532385	0.37977	0.335369	0.378242	0	0.169293
ENST00000231751.8	0	0	0	0.014119	0	0
ENST00000231790.6	0	0	0.10516	0	0	0
ENST00000231887.7	0.067834	0	0	0.102368	0	0
ENST00000232014.8	0.266701	0.122041	0	0	0	0
ENST00000232125.9	66.2579	82.4461	99.226	56.8489	66.738	75.5039
ENST00000232217.6	0	0	0.229596	0	0	0
ENST00000232375.7	0	0.2495	0.090852	0.087149	0	0.069626
ENST00000232424.3	9.16818	5.00091	4.25002	4.55352	1.5041	1.25654
ENST00000232458.9	0	0	0.197565	0	0	0.141664
ENST00000232496.4	0.694287	0.760502	0.724538	1.36676	0.798592	0.876607
ENST00000232501.7	2.19791	1.83413	1.60711	0.983258	2.6646	1.71124
ENST00000232508.9	6.75197	2.92376	2.37353	5.48192	1.2744	3.62456
ENST00000232564.7	0.496891	0.24285	0.395662	0.231576	0.399733	0.434185
ENST00000232603.9	0	0	0	0	0	0.191185
ENST00000232607.6	0.028948	0.10175	0.147203	0.08804	0.042145	0.078055
ENST00000232744.12	0	0	0.549143	1.63771	0	0
ENST00000232766.5	0.048525	0	0.030276	0.006079	0.073436	0
ENST00000232854.8	0.132274	0.103942	0.013072	0.112784	0	0.079829
ENST00000232888.6	15.3212	12.6347	17.8517	8.81757	4.15638	13.0891
ENST00000232905.3	23.8013	32.7258	30.3802	30.5672	44.9769	38.8303
ENST00000232974.10	0.710407	0.480986	0.339975	0.564986	0.037297	0.203152
ENST00000232975.7	0.055434	0.090846	0	0.191955	0.025964	0
ENST00000232978.12	0	0	1.73468	0	0	1.34367
ENST00000233025.11	0	0	0	0	0	0.229677
ENST00000233027.9	0.350626	0.175257	0	0.047994	0.055717	0.085379
ENST00000233055.8	5.80338	5.3063	4.10051	5.45005	4.86247	3.84031
ENST00000233057.8	0.285388	0.279594	0.08403	0.103101	0.039744	0.092133
ENST00000233078.8	17.4484	15.3875	16.5177	6.61389	4.99458	12.1081
ENST00000233084.7	43.8196	39.5626	47.4407	26.7618	16.3713	36.5808
ENST00000233099.5	7.84513	7.01225	4.66305	4.10425	4.62896	4.25276
ENST00000233114.12	3.86277	2.02296	5.21937	1.37622	3.18339	4.92424
ENST00000233121.6	0.052304	0	0	0.346758	0	0.207985
ENST00000233143.5	916.928	827.332	539.062	394.949	416.343	577.339
ENST00000233146.6	5.49466	6.01941	6.55545	1.68448	0	4.75401
ENST00000233154.8	5.49277	4.11834	1.64772	12.8662	18.163	7.67287
ENST00000233156.8	0.784498	2.05878	0.4105	2.53158	3.85539	1.66652
ENST00000233190.10	0.862912	0.750454	0.113165	0.363587	0.312674	0.309587
ENST00000233202.10	0.233038	0.135753	0.367396	0.304792	0.243119	0.249114
ENST00000233242.5	0.002975	0	0.035232	0	0	0
ENST00000233330.6	0.539241	0	0	0.747685	1.16216	1.01588
ENST00000233331.11	3.69402	3.07904	0.117763	2.24142	0	1.88227
ENST00000233336.6	0.502418	0.388458	0.374802	0.368731	0.18121	0.942239
ENST00000233379.8	0.253018	0.080505	0.091697	0.225254	0.206484	0.068876
ENST00000233468.4	101.026	109.343	87.769	61.7828	68.4201	108.27
ENST00000233505.12	0	0	0	0	0	0.253089
ENST00000233535.8	0	0	0.243345	0	0.079718	0.012069
ENST00000233545.6	0	0	0.411545	0	0	0.041766
ENST00000233557.7	4.12161	4.1807	3.7166	1.74164	3.97164	3.06508
ENST00000233573.6	30.3062	50.0365	23.4745	0.792996	1.10373	4.02332
ENST00000233575.6	54.8315	56.0031	55.7029	40.8997	38.7773	48.0529
ENST00000233596.7	0.517506	0.874302	0.358128	0.682074	0.047778	0.321015
ENST00000233607.6	0	0.003073	0	0	0	0
ENST00000233609.8	9.49116	9.63996	49.1583	22.7589	23.1807	98.0204
ENST00000233612.8	2.63656	3.67516	0.9264	2.19686	2.71672	5.05511
ENST00000233615.6	0	0.721218	0	1.82197	0	0
ENST00000233616.8	9.53714	14.2253	6.58774	9.07012	6.96223	5.07293
ENST00000233623.9	0.038162	0	0	0	0	0
ENST00000233627.13	0	0	0.298373	0	0	0.126566
ENST00000233630.10	0.578061	0.597651	0.555443	0.626284	0.21737	0.470303
ENST00000233638.7	0.036044	0	0	0	0	0
ENST00000233668.9	0.635352	0.152051	0.173538	1.3713	2.30951	0.677138
ENST00000233699.8	0	1.31242	0	0	0	0.259081
ENST00000233710.3	0	0	0.026992	0	0	0
ENST00000233714.8	0.483665	0.569259	0.208553	0.251426	0	0.578906
ENST00000233741.8	0	0	0	0	0.095128	0
ENST00000233809.8	7.08047	3.812	1.80475	0.848163	1.26137	0.186708
ENST00000233813.4	0.433841	1.48416	0.123409	0.539842	1.4259	0.058357
ENST00000233838.8	0.874513	0.713253	0.138358	0.268997	0.083663	0.2223
ENST00000233840.3	0	0.055861	0	0	0	0
ENST00000233893.9	1.31073	1.60807	0.976836	0.162978	0.24638	1.7264
ENST00000233948.3	0.045367	0	0	0	0	0
ENST00000233954.5	12.014	5.71015	1.26204	0	0.052593	0.014215
ENST00000233969.2	0.028227	0.026142	0.056748	0	0	0.017404
ENST00000233997.3	76.0834	126.608	41.4915	0	0	0.185617
ENST00000234038.10	0	0	0	0	0	0.02838
ENST00000234040.8	0.296567	0.333749	0.601431	0.36182	0	0.764186
ENST00000234091.8	0.130752	0.132142	0.021568	0.027479	0.195716	0
ENST00000234111.8	4.64691	5.16164	4.72453	5.04569	1.14091	7.05354
ENST00000234115.10	0.296511	0.390307	0.163511	0.32378	0.22058	0.243271
ENST00000234142.9	0	0.020694	0	0	0	0
ENST00000234160.4	0	0	0	0	0.117056	0.007341
ENST00000234170.9	16.0115	14.5895	12.6435	9.72778	5.7821	12.9729
ENST00000234195.7	0.199895	0.158261	0	0.055046	0.058862	0
ENST00000234198.8	1.12788	2.37468	0.566886	0.549226	1.08589	0.840294
ENST00000234256.3	28.0041	18.9557	5.72538	20.6015	15.0144	3.5183
ENST00000234296.6	3.94627	3.50747	2.6949	3.10602	1.6481	1.2102
ENST00000234301.2	7.92034	9.04997	5.62123	3.78788	3.34678	5.17642
ENST00000234310.7	10.5464	6.93847	4.47938	10.0091	8.26104	10.8861
ENST00000234313.7	831.618	684.798	776.041	1873.01	2022.15	1182.56
ENST00000234347.9	21.2521	64.4765	31.1216	0.082428	0.196226	0.140897
ENST00000234371.9	0.190336	0.136468	0.095665	0.144176	0	0.095351
ENST00000234389.3	0.011676	0	0	0.010108	0	0
ENST00000234420.9	0	0	0	0	0	0.006929
ENST00000234453.9	0.258204	0.162926	0.252861	0.172033	0.164052	0.162295
ENST00000234454.5	2.3288	1.76279	9.28318	3.21699	2.33114	6.10124
ENST00000234549.11	2.67914	3.4748	2.01347	0	2.9307	0
ENST00000234590.9	1129.34	1227.14	829.993	519.594	651.642	571.995
ENST00000234610.5	0.501226	0	0	0	0	0.221717
ENST00000234626.10	3.53926	4.31054	6.65934	0.989995	1.53328	4.47455
ENST00000234668.6	0.355433	0.401171	0.561615	0.450313	0.328693	0.483742
ENST00000234677.6	93.5803	81.6485	72.5489	93.0501	91.8501	66.5244
ENST00000234739.7	0.959173	1.02096	0.936596	0.642354	0.367145	0.456107
ENST00000234798.4	0.060701	0	0	0	0	0
ENST00000234827.5	0.042758	0.136873	0	0.040194	0	0.044157
ENST00000234831.9	0.097209	0.072971	0.058784	0.049769	0.088006	0.029516
ENST00000234875.8	6.95159	8.1125	9.48521	6.45864	5.01185	19.6945
ENST00000234961.6	0.203166	0.188549	0.072948	0.040341	0.116347	0.082534
ENST00000235090.9	2.51972	2.39653	3.83254	2.09227	1.10804	4.81114
ENST00000235150.4	3.62422	3.90269	2.47687	3.70712	3.80042	2.91316
ENST00000235180.4	0.262352	0.134882	0.200257	0.272825	0.134947	0.174375
ENST00000235307.6	0.569516	0.88203	0.262801	0.218378	0.147688	0.253697
ENST00000235329.9	18.2172	16.5629	12.0491	15.6549	15.5326	14.852
ENST00000235332.5	8.63522	6.13321	9.22353	4.33557	3.46414	4.14954
ENST00000235345.5	2.19726	2.46968	2.85496	4.71083	5.49768	4.79497
ENST00000235372.11	0.09223	0.083543	0.022205	0.322311	0.34477	0.082958
ENST00000235382.6	4.17838	1.52633	0.601763	1.14746	2.51006	0.616444
ENST00000235453.8	0.28974	0	0.536594	0.117138	0.390153	0.15029
ENST00000235521.4	1.56653	1.72263	0	0	0.881663	1.0366
ENST00000235532.9	0.201103	0	0	0	0	0.065673
ENST00000235790.8	21.2797	16.6728	7.13046	12.0223	12.0659	6.13737
ENST00000235835.7	12.3302	8.08913	11.609	9.00891	12.7477	21.2736
ENST00000235878.5	1.27882	1.43374	0	1.21028	2.87183	0
ENST00000235932.8	0.555257	1.11528	0.302238	0.547634	1.24361	0.743391
ENST00000236017.5	32.4816	25.6066	29.0488	42.3628	30.473	32.1297
ENST00000236040.8	0.145909	0.562446	0	0.509889	0.6562	0.173385
ENST00000236051.2	31.5111	33.0208	42.1944	14.7616	12.6187	34.9816
ENST00000236147.4	0.374606	0.147874	0.214081	0.52548	0.470126	0.223038
ENST00000236192.11	0.086702	0.063198	0.008272	0.101107	0.138528	0.038697
ENST00000236273.8	15.9633	14.5808	9.15001	48.2472	35.4614	29.1007
ENST00000236412.11	0.094983	0.626832	0	0.7159	1.00752	0.296952
ENST00000236671.6	0	0.107377	0	0	0	0.15099
ENST00000236698.9	0.025311	0	0	0	0	0.033496
ENST00000236914.7	1.11522	0.831995	0.688384	2.39285	1.7759	1.63261
ENST00000236937.13	0	0	0.101789	0.613327	0.105177	0
ENST00000236957.9	112.917	104.991	228.983	84.0392	58.3477	218.55
ENST00000236959.13	8.73561	10.6923	5.77197	3.71601	7.71741	8.39294
ENST00000236980.10	0.18394	0.112975	0.224573	0.17421	0.048591	0.474561
ENST00000237019.11	0.411377	0.504162	0.627402	0	0.250648	0.345182
ENST00000237177.10	0.038531	0	0	0	0	0
ENST00000237247.10	0.02176	0	0	0	0	0
ENST00000237264.8	0.088966	0	0	0.07761	0.068222	0.050501
ENST00000237281.4	3.5308	2.77192	2.02706	2.55693	2.36475	2.34123
ENST00000237283.8	2.28077	2.90352	2.58737	2.24128	3.19598	1.92693
ENST00000237305.11	0	0	0	0	0.021939	0.050546
ENST00000237316.3	0	0.020875	0	0	0	0
ENST00000237380.11	1.06962	1.43449	0.627173	0.962852	0.958571	0.934629
ENST00000237455.4	5.47644	4.87323	2.33999	5.79911	5.79742	3.15982
ENST00000237500.9	49.4007	40.814	13.7202	31.6661	30.7971	54.0684
ENST00000237512.4	2.70058	2.30138	2.13986	1.13545	0.89901	2.39886
ENST00000237530.10	100.399	106.619	63.6734	88.0078	102.05	125.04
ENST00000237536.8	0.316539	0.242977	0.105843	0.189188	0.170623	0.107993
ENST00000237596.6	0.99082	0.881104	0.941871	1.17099	1.53115	0.776467
ENST00000237612.7	0	0.055937	0.076245	0	0	0
ENST00000237642.6	0.175737	0.267627	0.166401	0.090145	0	0.219204
ENST00000237654.8	20.6628	23.4598	20.6994	9.77882	14.7293	12.5107
ENST00000237696.9	0.20228	0.177857	0.248513	0.127166	0	0.121749
ENST00000237724.9	1.97559	0	0	0	0	1.60001
ENST00000237822.7	0	0.064582	0	0.063545	0.098866	0
ENST00000237837.1	0	0.062475	0.005685	0.011251	0.030909	0.090487
ENST00000237841.5	0.486324	0	0.569143	0	0.341927	0.678712
ENST00000237853.8	0.626789	0.515442	0.219199	0.481217	0.584537	0.369391
ENST00000237858.10	2.02893	2.98054	2.89055	0.95827	1.58775	2.68253
ENST00000237889.8	10.1667	16.0253	30.5513	6.83135	7.32101	18.6319
ENST00000237937.7	0.06639	0.077326	0.023873	0.015132	0	0.03055
ENST00000238081.7	1.01714	0.851778	0.17863	0.323158	0.811528	1.08118
ENST00000238091.8	0.327478	0	0	0	0	0
ENST00000238112.7	27.1879	25.4291	27.0588	16.3734	14.3756	24.1698
ENST00000238138.2	0.533298	0	0.521269	0.224371	0	0.130794
ENST00000238146.8	0	0.54697	0.541551	0.253063	0	0
ENST00000238156.7	0.182088	0.054997	0	0	0.278771	0.034091
ENST00000238181.11	8.42897	0	2.0199	7.72376	9.99584	1.8669
ENST00000238256.7	10.388	9.48715	7.42837	7.74067	7.04057	7.11547
ENST00000238341.9	5.15387	5.79174	2.98342	1.42497	1.82932	1.91923
ENST00000238379.9	2.10902	2.88564	0.538673	0.039753	0.557988	0.234351
ENST00000238477.5	0.679389	0.399278	0.526536	0.097539	0.660038	0.505473
ENST00000238497.9	0	0	0.061716	0.776193	0.984442	0.24459
ENST00000238508.7	0.827313	0.301323	0	0.049914	0.08263	0.05274
ENST00000238561.9	0	0	0.897552	0.777281	0	0
ENST00000238607.10	0	0.037398	0	0	0.064129	0.018263
ENST00000238609.3	64.6003	48.3062	100.386	85.8338	68.6536	126.613
ENST00000238616.9	1.04722	1.48243	0.549137	0.954798	0.872277	0.558315
ENST00000238618.7	3.69921	1.8772	0	14.9048	0	5.50067
ENST00000238628.10	0	0.096734	0	0	0	0
ENST00000238633.6	0	0	0	1.12851	1.38976	0.707885
ENST00000238647.4	14.34	11.5852	5.26926	12.9272	11.402	4.08789
ENST00000238651.9	2.44072	0.398956	0.505899	1.81911	0	0.714111
ENST00000238667.8	0.062011	0.144354	0.070627	0.07755	0	0.022743
ENST00000238671.11	37.7974	39.4071	28.7284	23.2994	27.1867	29.8073
ENST00000238682.7	0.045694	0	0	0	0	0
ENST00000238686.8	0	0.035221	0.068775	0	0.108364	0
ENST00000238688.9	110.239	72.4545	306.294	81.8134	77.7821	182.196
ENST00000238714.7	2.7509	2.10175	1.04804	2.05026	1.24835	2.01089
ENST00000238721.8	0	0.623202	0.07398	0.0827	0.028157	0.205871
ENST00000238738.8	0.114178	0.070904	0.031506	0.165718	0.206603	0.122161
ENST00000238788.13	0	0	0	0.202962	0	0
ENST00000238789.9	1.1718	1.13402	0.861517	1.15461	1.41236	1.05126
ENST00000238823.12	7.80841	8.25384	17.2928	9.85109	6.27362	13.9443
ENST00000238831.8	3.23794	3.32661	1.1268	2.56027	2.91937	1.86879
ENST00000238856.8	4.54834	4.33585	3.39408	6.10402	5.34044	4.43548
ENST00000238875.9	3.61921	2.18449	1.13698	4.28613	5.16882	2.5403
ENST00000238892.3	3.81263	5.01822	1.99674	7.82639	7.99698	8.42531
ENST00000238936.8	2.518	2.03302	1.68368	2.03186	1.72628	1.10545
ENST00000238961.8	0.034345	0.057627	0.124528	0.089966	0.123241	0.119786
ENST00000238994.5	0.015219	0.037413	0.027198	0.039526	0.014257	0.009384
ENST00000239007.11	0	0	0	0.043724	0.075892	0
ENST00000239026.10	0	0	1.25665	0	0.97296	0
ENST00000239032.3	0.035916	0	0	0.004137	0	0.012808
ENST00000239117.3	0.146507	0.081246	0	0	0	0
ENST00000239151.5	0.729818	0.651201	0.022168	0.269598	0.215939	0
ENST00000239165.8	0	0	0.244047	0	0	0.052338
ENST00000239223.3	3.98801	3.39292	3.03487	5.26121	6.48846	3.20008
ENST00000239231.6	2.73369	3.44232	2.28851	3.2	2.8283	3.49271
ENST00000239367.6	0.601279	0.554892	0.631134	0.335742	0.555959	0.565623
ENST00000239374.7	0.384377	0.24135	0.029101	0.124521	0.05513	0.048054
ENST00000239440.8	0.254552	0	0	0	0	0.038241
ENST00000239446.5	0	0.009541	0	0	0	0
ENST00000239449.6	0.014241	0	0	0	0.01386	0.002489
ENST00000239451.6	0.167126	0.06849	0	0	0.012986	0
ENST00000239614.8	0	0	0	0	0	0.083672
ENST00000239666.8	0.530986	0.076457	0	0	0	0.253976
ENST00000239690.8	0	0	0.065736	0.025318	0	0.011115
ENST00000239830.8	0.225089	0.116194	0.233842	0.088996	0.373282	0.061414
ENST00000239852.10	0.806226	0.839485	0.24742	0.128459	1.08126	0.402161
ENST00000239859.7	2.215	2.3916	0.419404	0.883556	0	1.51008
ENST00000239878.8	0.199437	0.231368	0.034058	0.445288	0.317675	0.234638
ENST00000239882.6	0.488803	0.667807	0.020616	0.203712	0.508622	0.641028
ENST00000239891.3	45.0524	46.5093	58.9576	38.6577	35.4967	48.9824
ENST00000239893.9	7.87983	5.45409	33.635	1.88543	0	0.833832
ENST00000239906.9	0.126252	0.06767	0.046345	0.005166	0.232781	0.019284
ENST00000239938.4	10.6723	3.08245	0.923707	1.30062	0.388997	0.30122
ENST00000239944.6	2.04668	2.87332	2.86159	2.69611	1.46932	3.00536
ENST00000240050.8	1.84618	1.7527	1.67586	2.05464	0.891107	2.24355
ENST00000240055.7	0	0.014194	0	0	0	0
ENST00000240093.7	0.611279	0.466043	0.402462	1e-06	0.043262	0.133408
ENST00000240095.10	17.0933	10.0504	13.1579	9.24044	5.21729	5.47217
ENST00000240100.6	0.40339	0.293259	0.085765	0.185809	0.137282	0.105243
ENST00000240123.11	0	0	0	0.043146	0	0
ENST00000240132.7	0	0	0.059664	0	0.867659	0
ENST00000240139.9	1.10553	0	0	0	0	0
ENST00000240159.8	0.795228	0.443386	0.173313	0.276729	0.768702	0.700187
ENST00000240185.7	0.021004	0.010535	0	0	0.0418	0
ENST00000240285.9	4.81015	1.59385	0.391984	0.619727	0.563302	0.421946
ENST00000240304.5	1.25282	2.13012	0	0.706307	0.895408	0.188411
ENST00000240306.4	0	0	0.008461	0	0	0.005838
ENST00000240316.4	12.3496	12.5587	10.9722	11.5661	10.7474	12.2377
ENST00000240333.10	0	0	0	0.137196	0	0.050141
ENST00000240364.6	1.08144	0.240137	0	0	0	0
ENST00000240423.8	0.158022	0.706181	0.104987	1.18262	1.17977	0.168919
ENST00000240487.5	0	0.554488	0.523388	0.322397	1.32078	0.441703
ENST00000240488.7	0.654981	2.79694	4.23956	0.396628	0.823045	2.2245
ENST00000240499.7	5.2513	4.53041	1.52138	2.41404	2.29046	2.69389
ENST00000240587.4	0.05684	0.049961	0.006633	0	0	0.002277
ENST00000240617.9	0.045194	0.105972	0.077867	0.076926	0	0
ENST00000240619.2	0.037485	0.215008	0.066988	0	0	0
ENST00000240651.13	0.04742	0	0	0.006005	0.038564	0.019705
ENST00000240652.7	0	0.021251	0	0.042182	0	0.007051
ENST00000240719.7	0.340642	0	0	0.783093	0	0
ENST00000240851.8	0	0	0.753238	2.28308	3.86931	0
ENST00000240922.7	0.02404	0.047249	0	0	0.023197	0.028028
ENST00000241014.6	0.014214	0.057328	0	0	0	0
ENST00000241041.7	0	0	0.110452	0	0	0.156628
ENST00000241051.7	2.27578	2.32872	1.10083	0.371384	0.329737	0.881028
ENST00000241052.4	189.362	164.455	116.62	49.9757	32.3567	61.6526
ENST00000241125.3	0	0	0	0	0	0.00226
ENST00000241261.6	0.124804	0.899137	0.594455	0.233875	0	0.01823
ENST00000241312.8	0	0	0	0	0	0.000915
ENST00000241337.8	0	0.93951	0	0	0	0
ENST00000241393.3	38.916	24.5983	4.41742	56.3864	47.9762	24.0257
ENST00000241416.11	0.057453	0.019577	0.110721	0.034335	0.136829	0.033937
ENST00000241436.8	0.089968	0	0	0	0	0
ENST00000241453.11	0	0.70675	0	0	0	0
ENST00000241463.4	0.443427	0.449865	0.162962	1.87488	1.26711	0.749005
ENST00000241502.8	0.25486	0.282141	0.052969	0.090077	0.052071	0.06142
ENST00000241600.9	7.23979	4.87173	5.51464	6.27029	4.4711	5.58981
ENST00000241704.7	20.3041	14.1148	5.84943	9.16856	9.28514	6.78754
ENST00000242057.8	7.12392	6.78094	0.679052	1.62147	2.7323	1.9545
ENST00000242059.9	0.263393	0.216393	0.088683	0.146389	0	0.050778
ENST00000242066.9	0	0	0.011148	0	0	0
ENST00000242067.10	0	0.710725	0.031636	0.579223	0	0
ENST00000242108.8	0.260309	0.40214	0.031856	0.253287	0.122377	0.080703
ENST00000242140.9	0.305987	0	0	0.139785	0	0
ENST00000242159.4	0.394	0.418836	0	0	0	0.035313
ENST00000242208.4	0.008153	0.034023	0.00345	0.003771	0.009905	0.016373
ENST00000242209.8	0.396129	0.152682	0	0	0.083269	0
ENST00000242248.9	0.476482	0	0.515831	0.435127	0	0.093596
ENST00000242257.12	5.65426	6.20072	1.75525	3.96362	2.53133	7.29803
ENST00000242261.5	0.068597	0	0	0.374585	0.338523	0.05359
ENST00000242275.6	5.49504	6.30491	5.26567	4.46849	3.25575	4.16089
ENST00000242310.4	0	0.007141	0	0.007503	0	0.010786
ENST00000242323.8	0.074886	0.05255	0.003031	0.026888	0.02319	0.008866
ENST00000242351.9	0.011807	0.089395	0.10196	0.056981	0.296048	0.152077
ENST00000242462.4	0.02819	0.069298	0.063026	0.048808	0	0
ENST00000242465.3	593.175	515.152	543.584	488.241	660.326	376.732
ENST00000242480.3	0.634861	0.131479	0	0.766161	0	0
ENST00000242505.10	1.28698	1.32759	0.69404	1.18408	1.03802	0.844383
ENST00000242576.6	16.7677	16.7055	20.7192	3.49126	3.34104	13.2314
ENST00000242577.10	49.8285	38.0017	24.0921	41.328	50.1045	42.5747
ENST00000242591.9	0.989757	0	0	0	0	0.114201
ENST00000242592.8	5.7748	5.07098	4.2069	3.18307	2.86636	3.63004
ENST00000242607.12	0	0.109607	0	0	0	0
ENST00000242719.3	1.61433	1.48418	0.254839	2.01448	2.61867	1.20103
ENST00000242728.4	0.033305	0.104596	0	0.112221	0	0
ENST00000242729.6	0	0	0.006196	0	0	0
ENST00000242737.5	5.60342	0	0	2.47105	0	0
ENST00000242770.9	0	0	0	0	6.2905	1.12683
ENST00000242776.8	60.2683	66.4514	108.666	18.3487	11.6298	70.4334
ENST00000242783.10	1.55202	5.65288	2.91117	10.0536	9.53028	5.03451
ENST00000242784.4	65.6003	49.5806	57.7975	43.0632	36.5363	52.7517
ENST00000242786.5	0	0	1.62619	0	0	0.510589
ENST00000242804.8	0.020586	0.05424	0.079752	0.088059	0.004643	0.02479
ENST00000242810.10	26.3645	28.3708	6.19099	38.4725	43.3104	7.09124
ENST00000242827.10	21.4252	29.6276	24.8069	12.3994	9.65425	22.5147
ENST00000242839.8	0	0	0	0	0.082549	0.020841
ENST00000242848.8	4.93953	3.55546	2.97955	2.08696	1.4287	2.01766
ENST00000243040.10	1.26904	0	0	0	0	1.09641
ENST00000243045.9	1.11245	0.857337	0.251506	0.224495	0.323862	0.707372
ENST00000243052.7	0.0154	0	0	0	0	0
ENST00000243077.7	1.27012	1.85163	0.156932	0.463484	0.124497	0.017334
ENST00000243103.3	0.045988	0.067664	0.005131	0.018196	0	0.003541
ENST00000243112.9	3.52293	1.77662	1.6731	3.39623	2.34422	0
ENST00000243167.8	0.349379	0.507315	0.043501	0.302456	0.109869	0.09637
ENST00000243189.11	6.58282	1.75678	2.74565	3.92404	5.87327	2.17712
ENST00000243213.1	0	0	0	0.061237	0.172286	0.008723
ENST00000243222.8	0	0	0	0.040334	0	0.013891
ENST00000243253.7	1.26867	1.07215	0.511601	1.16826	0.399904	2.49979
ENST00000243286.7	6.7396	13.3431	0	18.9636	16.5534	17.229
ENST00000243298.2	1.01082	0.568918	0.725295	1.29049	1.20034	1.0104
ENST00000243325.6	8.25352	5.62287	2.56273	6.82273	5.36111	9.30821
ENST00000243326.9	0.340422	0.165082	0.02817	0.070082	0.071179	0.058294
ENST00000243344.7	2.98037	3.12402	2.35612	1.45678	1.10543	2.22832
ENST00000243346.9	49.1797	51.9644	62.417	52.742	53.1881	68.257
ENST00000243347.4	1.32452	0.89218	0.060805	0.718712	0.050997	0
ENST00000243349.12	0	0	0	0	0	0.003917
ENST00000243389.7	0	0	0.008708	0.018113	0	0.002648
ENST00000243440.1	0.878426	0.654359	0	0.224679	0.037403	0.160021
ENST00000243457.3	0	0	0	0.035535	0	0
ENST00000243498.9	17.648	22.1811	20.8079	8.28674	10.9665	20.9877
ENST00000243501.9	0.413636	0.33541	0.135952	0.445434	0.688871	0.320333
ENST00000243563.7	0	0	0	0	1.49436	0.041123
ENST00000243578.7	0.664104	0.097593	0.040968	0.342632	0.360365	0.068859
ENST00000243583.10	3.82638	2.47296	3.40357	2.94091	4.64562	3.19111
ENST00000243639.8	1.30331	1.43907	0.615166	1.33333	0.897455	0.989921
ENST00000243644.8	4.07315	2.86555	0.753261	2.53392	3.18624	1.17181
ENST00000243662.10	20.0992	15.4963	21.0676	22.769	26.9355	18.9197
ENST00000243673.6	0	0.048061	0.011049	0.029636	0	0.027548
ENST00000243706.8	0.455409	0.273337	0.026006	0.119001	0.066243	0.092064
ENST00000243776.10	2.23963	2.02288	2.04667	2.91605	3.34366	2.30671
ENST00000243786.2	0	0.08649	0.011789	0	0.148313	0.024405
ENST00000243806.2	2.5033	2.19624	1.47499	1.54525	0.735767	0.901005
ENST00000243810.10	0	1.30017	0	0	2.45894	0
ENST00000243878.8	1.63932	1.3078	1.33723	1.17422	1.78999	1.13149
ENST00000243893.10	3.11711	0.628204	0.842366	1.0896	0	2.46894
ENST00000243896.6	0	1.95565	0.791666	1.19282	1.71129	0.266116
ENST00000243903.5	4.41602	3.34897	3.65706	2.09871	1.24805	3.02808
ENST00000243918.9	0.053178	0.058842	0	0	0	0
ENST00000243924.3	0.207876	1.53303	0.216701	0	0	0
ENST00000243997.7	0.144022	0.23791	0.18792	0.062269	0.346241	0.376663
ENST00000244007.7	1.26812	1.50488	1.37885	1.0911	0.950843	1.17373
ENST00000244020.4	1.42458	0.849348	0.62316	1.05128	0.951842	0.804031
ENST00000244040.3	1.44387	1.68986	1.3719	1.53702	2.45698	1.39175
ENST00000244043.4	0.200466	0.181291	0.058024	0.05034	0.138435	0.065434
ENST00000244050.2	0.824979	0.600889	0.624527	1.10103	1.4812	0.586259
ENST00000244051.2	2.36017	2.66176	2.36701	2.48981	2.11514	1.92075
ENST00000244061.5	0	0	0	0.038201	0	0
ENST00000244070.7	1.00304	0.942045	0.224257	0.789026	0.51732	0.677518
ENST00000244137.11	4.86881	5.48285	0	19.8484	22.8206	37.0915
ENST00000244174.10	41.1565	33.63	27.5024	12.0076	8.36816	13.8831
ENST00000244204.10	30.3405	30.3872	22.5286	13.0889	11.9871	16.9125
ENST00000244217.5	5.68658	6.87462	6.09063	6.88708	9.23879	8.61458
ENST00000244221.8	1.11481	0.963482	0.288575	0.509634	0.486276	0.372726
ENST00000244227.7	0	0.114254	0	0	0	0
ENST00000244230.6	15.0453	12.5217	11.4007	15.6591	10.2656	17.8806
ENST00000244289.8	0.56152	0.553317	0.770419	0.317883	0.803626	0.708039
ENST00000244333.3	0.16582	0.390571	0.044016	0.056903	0	0.052161
ENST00000244336.9	0.46992	0.331466	0.367682	0	0	0
ENST00000244364.10	0.150973	0.258054	2e-06	0.148875	0.190687	0.207391
ENST00000244426.10	0.163409	0.012185	0	0	0.014782	0.022572
ENST00000244496.5	24.7994	23.9928	42.8769	27.1077	27.8739	49.4192
ENST00000244519.6	0	0	0.120745	0	0.042646	0
ENST00000244520.9	32.9013	54.055	37.8241	12.1889	9.00602	24.8273
ENST00000244533.7	0	0	0	0	0.13238	0
ENST00000244534.6	1435.1	1357.46	634.098	565.454	445.037	581.005
ENST00000244537.5	2354.85	3091.81	2548.09	856.715	626.218	1283.45
ENST00000244546.4	2.50495	2.84814	1.11311	3.34275	3.745	0.741636
ENST00000244565.7	0.030569	0	0	0	0	0.004407
ENST00000244571.4	3.41173	3.24595	4.4688	1.55561	1.13112	2.91747
ENST00000244573.4	24.4763	25.6913	24.5843	14.2859	13.5914	15.9586
ENST00000244576.8	0.174114	0.234213	0.054825	0.135141	0.030828	0.030216
ENST00000244623.1	0	0	0	0	0.0974	0
ENST00000244670.12	0	0.401309	0	0	0	0.152418
ENST00000244711.3	3.25692	3.24965	1.44727	0.676363	0	1.54303
ENST00000244741.9	1.99151	0.578536	0.181423	7.47955	5.20939	1.97344
ENST00000244745.3	6.84126	9.81303	3.65898	3.29989	4.45232	1.86481
ENST00000244751.6	0.024496	0.017652	0.094416	0.046049	0.129664	0.211497
ENST00000244763.8	0.242529	0.176907	0.055045	0.11962	0.176213	0.129087
ENST00000244777.6	0	0.562433	0.142627	0.714181	0	0.624894
ENST00000244815.9	0	0.039881	0	0	0.037132	0.010834
ENST00000244869.2	0.411537	0.420803	0.316083	0.324746	0.703872	0.335798
ENST00000245046.6	9.34072	7.76071	9.58643	10.1546	14.0199	10.0394
ENST00000245105.7	0.278717	0	0.048505	0.129233	0	0.019524
ENST00000245121.9	0	0.125272	0	0	0	0
ENST00000245157.9	0	0.414108	0.653002	1.68465	2.6546	0
ENST00000245185.5	2.65162	2.18855	0	2.0369	2.35466	0.509624
ENST00000245206.9	0	0.208275	0.08597	0	0.05511	0.159956
ENST00000245222.8	0.19715	0.12232	0.173587	0.211378	0.196629	0.623462
ENST00000245255.7	0.042291	0.02176	0	0.006038	0.016156	0.003684
ENST00000245304.4	0.3641	0.318573	0.284937	0.344927	0.471949	0.768462
ENST00000245323.4	0	0.632181	0.716026	0.68631	1.50444	1.83221
ENST00000245382.6	0	0	0	0.730212	0	0.227841
ENST00000245407.7	0.080497	0	0	0	0	0
ENST00000245414.8	2.11428	1.86934	0.17072	0.495828	0.119919	0.58989
ENST00000245441.9	0.042261	0.012752	0	0.029931	0	0
ENST00000245448.10	0.341635	0.483268	0.139633	0.384331	0.762422	0.150512
ENST00000245457.5	1.19544	1.6669	1.02967	0.265324	0.075553	0.250574
ENST00000245458.10	446.69	524.114	1404.95	307.3	218.792	997.39
ENST00000245539.10	16.5691	20.6968	11.7908	6.73403	8.18063	13.3897
ENST00000245543.5	0.308736	0.929217	0.752976	0.447517	0.494408	0.339516
ENST00000245544.8	6.49618	13.0886	7.26089	3.56758	3.10492	5.35753
ENST00000245552.6	0	0	0	0	0	0.633806
ENST00000245564.6	0	0.559233	0	0.392986	0	0
ENST00000245615.5	4.06656	2.13591	0.534672	0	2.86749	1.48549
ENST00000245618.5	0.497083	1.20438	1.02773	1.76696	0.770295	1.12028
ENST00000245663.8	0	0.052073	0	0	0	0
ENST00000245680.6	0.019095	0.012405	0	0.026422	0.278719	0.012497
ENST00000245787.8	2.42262	2.16625	0.456878	1.73348	1.46548	1.24881
ENST00000245796.10	5.37842	4.86795	4.96647	6.71328	5.19153	5.09777
ENST00000245810.1	0	0	0	0	0.621555	0
ENST00000245811.6	0.058599	0	0	0	0.137231	0
ENST00000245812.7	14.6875	10.8553	8.92176	14.4298	11.8624	10.3356
ENST00000245816.9	11.2497	6.51116	8.90558	9.26505	6.50218	14.4551
ENST00000245817.4	3.58872	1.57808	3.09013	6.44146	3.6201	3.34033
ENST00000245838.12	0.034584	0	0	0.039053	0	0
ENST00000245857.9	0	0	0	0	0	0.503867
ENST00000245865.10	0	0	0.145956	0	0	0
ENST00000245907.10	1.44115	2.25351	0.342195	1.20015	0.11893	0.068142
ENST00000245912.7	0.063642	0	0	0	0	0.051216
ENST00000245923.8	0	0	0	0.2844	0.717236	0
ENST00000245925.7	3.32884	5.19318	8.84724	7.0237	6.36678	7.63239
ENST00000245932.10	26.1421	27.0991	34.6877	60.405	69.3677	46.0441
ENST00000245934.11	14.609	14.819	15.744	10.705	10.592	12.6263
ENST00000245960.9	1.42243	2.03915	0.921511	0.395594	0.594552	0.985381
ENST00000246006.4	1.18857	0.824804	0.603892	0.554477	0.338182	0.54169
ENST00000246015.8	0	0	0.144801	0	0	0.013173
ENST00000246024.6	2.77542	2.58932	1.50319	4.06007	4.76479	3.02243
ENST00000246041.6	0	0	0	0	0.413759	0
ENST00000246043.8	16.5388	11.4429	12.7514	11.8784	7.60726	7.98097
ENST00000246069.11	0.211767	0.225608	0.108784	0.206927	0	0.062067
ENST00000246070.2	0	0.0774	0	0	0	0.062292
ENST00000246080.3	5.87195	2.71039	3.01243	3.94011	1.65498	2.2858
ENST00000246100.3	0	9.57806	0	0	0	0
ENST00000246104.6	0	0.00877	0	0	0	0
ENST00000246115.4	7.81194	10.169	8.12887	4.80457	4.86313	5.89119
ENST00000246117.8	0.827199	0.688201	0.551935	0.341848	0.375773	0.716893
ENST00000246139.9	0	0	0	0.292882	0	0.051293
ENST00000246149.10	3.83476	4.54679	3.43067	0.356773	0.555664	0.236911
ENST00000246151.8	22.8941	17.8752	19.5073	20.5504	13.7061	19.4408
ENST00000246163.2	2.50041	1.63633	2.56334	2.53102	3.78873	3.19484
ENST00000246166.2	0	0.24249	0	0.203166	0.039676	0.05696
ENST00000246174.6	6.75383	7.02652	7.13741	6.09573	6.81414	7.71471
ENST00000246186.7	0.077936	0.03548	0.088992	0.157467	0.219054	0.098775
ENST00000246194.7	50.1153	51.6452	40.5486	64.2517	62.7982	56.7252
ENST00000246229.4	2.68	2.63337	1.77116	2.72777	1.75797	1.83347
ENST00000246314.10	1.76861	2.64316	2.35246	2.43016	4.98664	3.61602
ENST00000246337.8	66.2657	62.0576	125.705	112.103	160.827	167.035
ENST00000246421.4	2.98236	2.43256	2.84924	5.031	3.01242	2.6024
ENST00000246489.11	13.0994	9.87007	2.35077	11.6141	10.5138	12.8768
ENST00000246505.9	0	0	0.381159	0	0	0
ENST00000246515.1	0	0.122499	0	0	0	0
ENST00000246529.3	0.596178	0.162839	0.027318	0	0	0.065977
ENST00000246533.7	0.315307	0.18208	0.121969	0.633803	0.237638	0.408741
ENST00000246535.3	4.13433	5.01324	6.09144	4.33211	2.49864	6.20616
ENST00000246548.8	1.06417	0.683478	0.145754	0.061433	0	0.191925
ENST00000246549.2	0.319662	0.09882	0.117848	0	0	0.031641
ENST00000246551.8	25.5781	23.753	28.4618	35.2941	40.6592	38.6831
ENST00000246553.3	0.060902	0.200269	0	0	0.044824	0.006375
ENST00000246554.7	76.2405	71.728	46.5595	49.2185	49.963	82.4677
ENST00000246635.7	0	0.039001	0	0	0	0
ENST00000246646.3	0	0	0	0	0.007706	0
ENST00000246672.3	2.02111	1.98508	1.14417	0.311585	0.356611	0.469441
ENST00000246747.8	4.41156	2.76376	0.408677	1.49991	2.36176	2.02348
ENST00000246784.7	15.8253	15.2793	26.1628	8.06703	8.35142	12.8596
ENST00000246792.3	5.15446	7.05889	7.57956	9.86954	10.6316	6.95628
ENST00000246794.9	0.165696	0.226289	0.431826	0.62583	0.310432	0.208098
ENST00000246801.7	0.163849	0.077001	0	0	0	0
ENST00000246802.9	29.303	20.0267	20.2755	18.2579	9.5824	20.3097
ENST00000246868.6	1.22074	0.291573	0	0.296364	0	0.483378
ENST00000246911.6	0	0	0	1.37746	0	0
ENST00000246949.9	0.124391	0.188921	0	0.114864	0.189372	0.019149
ENST00000246957.9	25.7172	23.9823	30.1984	12.4587	10.3844	28.3844
ENST00000247001.9	0	0	0.06858	0.272008	0	0.496609
ENST00000247003.8	9.78157	0	1.63613	9.99982	5.56192	6.86134
ENST00000247005.7	0.036968	0	0	0	0	0
ENST00000247020.8	8.88192	6.32677	3.04967	6.11041	8.05207	5.15503
ENST00000247026.9	0	0	0	0.123681	0	0.23514
ENST00000247087.10	0.157895	0	0.269706	0.12219	0	0.336567
ENST00000247138.10	0	2.01378	2.34593	0.200083	0	1.94756
ENST00000247161.7	0.489454	0.638209	0.423679	1.21908	0.448	0.419376
ENST00000247178.5	1.87425	2.05668	1.80308	2.3079	2.92829	1.44112
ENST00000247191.6	5.8871	8.47063	15.3765	1.64843	1.80857	14.3416
ENST00000247194.8	1.87454	3.69721	4.52039	0.9315	1.63182	3.93769
ENST00000247207.6	7.99924	3.87886	3.73012	7.29655	5.11551	3.47092
ENST00000247219.5	0	0.018576	0	0.009728	0	0.006914
ENST00000247225.6	8.99853	10.1884	6.95533	3.95508	4.65351	4.53199
ENST00000247226.12	0.006216	0.067864	0.011769	0.029722	0	0.054157
ENST00000247295.4	0	0	0.017824	0	0	0
ENST00000247461.8	0	0	0	0.290682	0	0.2098
ENST00000247470.9	5.1989	3.51578	5.01476	0.65611	0	2.68761
ENST00000247655.3	0.251833	0	0	0	0	0
ENST00000247665.11	20.8938	14.6508	15.5252	10.7281	11.0559	12.3544
ENST00000247668.6	6.74946	7.0491	11.7968	4.68958	4.53582	6.95843
ENST00000247706.3	5.49963	4.49566	2.46937	6.42771	4.39236	2.84297
ENST00000247781.4	0.022199	0.009095	0	0	0	0
ENST00000247815.8	0.377796	0.520938	0.089748	0.123653	0.382285	0.136843
ENST00000247866.8	150.58	183.533	342.205	103.142	87.2637	179.794
ENST00000247879.2	0	0.05805	0	0	0	0
ENST00000247881.3	0.285843	0.101329	0.010883	0.022767	0	0.090479
ENST00000247883.5	0.033843	0.027732	0.09072	0	0.015851	0.010433
ENST00000247930.4	6.03262	5.78898	4.79713	3.6335	4.12579	3.27729
ENST00000247933.8	3.6192	2.43494	2.63929	2.55378	1.62517	1.70248
ENST00000247970.8	0.698622	0	0	1.3682	2.10452	0
ENST00000247977.8	0.206138	0	0	0.074829	0	0
ENST00000248041.12	0.154567	0	0	0	0	0
ENST00000248054.9	5.096	4.12854	4.29286	6.3709	5.89393	4.11043
ENST00000248071.5	0.190996	0.140791	0.025643	0.16527	0	0.041198
ENST00000248072.3	0	0	0	0	0.11462	0
ENST00000248076.3	15.4544	12.9365	16.4201	24.3405	29.491	22.7655
ENST00000248089.7	0	0	0	1.36096	0	0
ENST00000248098.7	0	0.084693	0.023752	0.011852	0.058296	0
ENST00000248114.6	0	0.017702	0	0	0.033792	0.028998
ENST00000248121.6	0.552215	0.308375	0.076449	0.264231	0	0.107103
ENST00000248139.7	0	0	0	0.280361	0.258661	0.194087
ENST00000248142.7	0	0	0.146571	0	0	0
ENST00000248151.4	1.56274	2.7518	3.68493	0.449065	0.233782	0.553141
ENST00000248211.10	0.012848	0	0	0.039186	0	0
ENST00000248244.5	3.27072	2.44498	1.82015	1.89385	1.68647	1.29135
ENST00000248248.7	0.583717	0.646691	0.171682	0.193701	0.326574	0.168044
ENST00000248306.7	1.51197	1.69501	1.25171	0.807825	1.15845	1.22009
ENST00000248342.8	11.7909	6.97391	78.1924	6.08172	0	9.83276
ENST00000248378.5	23.5241	29.7186	40.891	28.788	18.1519	37.8863
ENST00000248384.1	0	0	0	0	0.075441	0
ENST00000248420.9	4.08697	3.77768	3.2234	2.72007	2.47727	3.15139
ENST00000248437.8	30.8042	35.3411	91.5321	77.722	139.239	143.137
ENST00000248444.9	0	0	0.044444	0	0	0.023405
ENST00000248451.7	24.1058	23.3284	27.1718	16.595	13.4781	17.5094
ENST00000248484.8	0.142996	0.960037	0.136482	0	0	0.005538
ENST00000248550.7	0	0	0	0	0	0.100809
ENST00000248553.6	219.578	172.929	278.092	297.376	257.474	258.474
ENST00000248564.5	39.4652	35.0427	26.6915	168.56	182.254	90.8523
ENST00000248566.3	10.6162	12.4249	6.49723	20.3359	18.1862	13.2501
ENST00000248594.10	3.35561	1.4931	1.17684	4.3918	5.94879	3.17264
ENST00000248598.5	0.993161	1.62875	0.682051	0.812767	0.777618	0.639176
ENST00000248600.5	0.545636	0	1.71019	1.41659	3.38286	0.713826
ENST00000248633.8	0.21472	0.484041	0	0.053119	0	0.183739
ENST00000248668.4	0.668361	0.473405	0.192319	0.446207	0.313839	0.153661
ENST00000248701.8	3.64614	4.89523	0	0	0	0
ENST00000248706.4	0.212458	0	0	0	0	0
ENST00000248846.9	0.897065	0	0.407268	0	0.732516	0.164863
ENST00000248879.7	5.13863	3.93444	5.01677	1.12891	1.87769	2.43164
ENST00000248899.10	90.083	62.9262	72.8476	79.3068	67.3106	81.4902
ENST00000248901.10	1.40748	1.69393	1.19954	0.806656	0.641611	0.413033
ENST00000248923.8	3.17745	1.65244	1.20017	3.8751	4.83832	1.98342
ENST00000248924.10	5.9684	7.45837	9.33082	2.80766	2.20635	6.85529
ENST00000248929.13	5.75936	7.59805	8.91121	9.14505	10.8404	6.52202
ENST00000248948.3	0	0.053554	0	0	0	0.080593
ENST00000248958.4	16.0954	8.29975	43.6291	18.5791	6.02058	43.3067
ENST00000248975.5	65.3032	61.9188	78.5514	83.391	118.648	86.0026
ENST00000249005.3	0	0	0	0	0	0.04706
ENST00000249014.4	0.75951	0.33093	0	0.358967	0.07438	0.00544
ENST00000249041.2	0.100989	0.27584	0.120316	0.276849	0.141903	0.145289
ENST00000249042.7	0	0	0.409786	0	0	0.062151
ENST00000249064.8	1.79515	1.86644	1.15173	1.19385	0.483761	1.19184
ENST00000249071.10	0.76212	0.920072	0.316737	1.04278	1.62483	0.317631
ENST00000249075.3	0.392273	0.064129	0.038752	0	0	0
ENST00000249116.6	1.80932	0	0.869448	0	0	0.570801
ENST00000249209.8	0.849248	0	6.07883	2.48585	3.5327	2.66198
ENST00000249289.4	194.138	144.413	140.733	170.709	171.249	135.021
ENST00000249299.6	16.428	27.6488	25.6999	17.8499	19.1458	31.3548
ENST00000249330.2	0.104686	0	0	0	0	0
ENST00000249344.6	2.13045	1.25759	1.00307	2.44979	3.27571	1.52887
ENST00000249356.3	11.2865	6.83895	5.62387	20.759	14.5489	9.80484
ENST00000249363.3	0.079962	0.131044	0.053587	0.034611	0.023408	0.035131
ENST00000249364.8	0	0.608863	0.120665	0.018124	0.043097	0
ENST00000249373.7	0.825132	0.752134	0.397929	0.736294	1.18447	0.493159
ENST00000249375.8	0	0	0.028013	0	0	0
ENST00000249389.2	0	0	0	0.061616	0	0
ENST00000249396.11	0.733953	0	0.71649	0.761201	0	1.23755
ENST00000249499.7	0	0	0.055289	0	0	0.006359
ENST00000249636.10	0.015205	0.037854	0.002859	0.080509	0.097438	0.047288
ENST00000249647.7	0.339603	0.264118	0.053998	0.466146	0.507045	0.39352
ENST00000249700.8	0.009961	0	0	0	0	0
ENST00000249736.11	9.80857	14.1433	12.5404	5.67841	9.0992	14.1589
ENST00000249750.8	0	0	0.025364	0	0	0
ENST00000249786.8	0	0.500004	0	0	0	0
ENST00000249806.10	0.315705	0.140511	0.0638	0	0	0
ENST00000249822.8	0.419794	0.348677	0.193074	0.354926	0.295385	0.307747
ENST00000249837.7	1.84533	1.91626	0.805723	0.888503	0.619234	0.757093
ENST00000249861.8	0.640877	0.406986	0.386535	0.235792	0.427745	0.273565
ENST00000249883.9	0	0	0	0	0	0.111518
ENST00000249923.7	6.2127	5.51872	2.03391	5.46333	7.55598	7.47053
ENST00000250018.6	0.215479	0.2126	0.052055	0.031634	0.030814	0.048126
ENST00000250024.8	5.14009	6.10471	6.32433	1.42481	1.94027	4.91771
ENST00000250056.12	0	0	0	0	0.163497	0.099395
ENST00000250092.10	47.387	51.2738	9.94236	73.7006	82.4382	21.6118
ENST00000250101.9	0.020965	0	0	0	0	0
ENST00000250111.8	0.535952	0.420607	0.453196	1.62316	1.3882	0.431829
ENST00000250113.11	15.9837	14.7448	13.5177	18.5647	17.0804	13.6483
ENST00000250124.10	0	0	0	0.274499	0	0
ENST00000250173.5	0	0.246191	0.061952	0	0	0.049874
ENST00000250237.9	13.0129	9.35523	17.7418	2.31547	1.24902	5.74963
ENST00000250241.12	0.044973	0.036553	0.471477	0	0.267771	0.11447
ENST00000250244.10	0.10476	0	0	0.763105	1.89859	0
ENST00000250263.7	0.061221	0.095037	0.06145	0.045501	0	0.011857
ENST00000250340.8	42.4613	13.8814	7.67551	18.6308	10.5947	9.62418
ENST00000250360.7	2.25323	1.96339	0.495085	0.686124	0.090852	0.255889
ENST00000250377.11	0.440869	0.319612	0.104831	0	0.058806	0.08454
ENST00000250378.7	0.543651	0.102802	0.205518	0	0	0
ENST00000250379.12	0.572936	0.103979	0.18993	0	0	0.454607
ENST00000250405.9	0.160285	0.145185	0.070364	0.210845	0.147059	0.201201
ENST00000250454.7	34.6672	26.4682	18.8487	33.2863	24.3826	23.3626
ENST00000250457.7	6.47187	5.69901	3.56167	20.4848	26.2547	6.48919
ENST00000250489.8	1.04174	1.2597	1.49713	1.80658	1.5461	1.12058
ENST00000250495.9	87.9804	78.2878	43.1401	122.735	58.1928	109.514
ENST00000250498.8	540.713	630.621	763.118	260.414	196.91	357.041
ENST00000250559.13	0.239533	0.192174	0.040383	0.073524	0.035972	0.037888
ENST00000250572.12	0.56492	0.245198	0	1.06203	0.65682	0.184204
ENST00000250617.6	6.37067	7.31718	2.15548	0.235488	0	0.111523
ENST00000250693.1	0	0.024252	0	0	0	0
ENST00000250784.12	24.5536	0.046897	13.2259	13.5175	0	19.7699
ENST00000250823.4	0	0	0	0	0	0.089875
ENST00000250896.7	0.099791	0.032027	0	0.067987	0.11452	0.046775
ENST00000250916.5	0.623264	0.528361	0.114158	0.559855	0.413458	0.885248
ENST00000250930.7	3.49974	3.26542	2.86772	5.2508	5.19785	3.15232
ENST00000250974.9	9.12066	8.43195	13.8541	0	0	4.51413
ENST00000251038.9	0.182387	0.181595	0.030286	0.047272	0.027579	0.062159
ENST00000251047.5	4.61982	4.14621	4.79033	7.29177	7.31854	7.88494
ENST00000251074.5	27.0923	36.2778	54.3571	19.6498	14.7444	42.1389
ENST00000251076.9	0.382887	0.069364	0.299878	0.285356	0	0.276482
ENST00000251081.6	1.43705	0.920421	0.20158	0.431717	0.092689	0.178142
ENST00000251089.6	3.46429	3.81692	2.43994	3.08146	2.09533	2.03861
ENST00000251102.12	0.0405	0.006021	0	0.002952	0	0
ENST00000251108.10	0.166189	0.595597	0.236079	0.169624	0.085115	0.211559
ENST00000251170.11	1.65349	0.876648	1.13989	4.95439	5.62053	1.98744
ENST00000251195.9	4.52983	4.37593	0.690326	0.592566	0.358578	1.57331
ENST00000251241.8	0.027505	0	0	0	0	0
ENST00000251250.7	0.039698	0.044236	0.018831	0.098404	0.034851	0.036541
ENST00000251268.10	1.36947	1.01652	0.675957	0.908835	0.099912	0.268868
ENST00000251287.2	0.044951	0	0	0.016647	0	0
ENST00000251303.10	42.7486	48.8029	59.4093	41.2133	42.7558	46.0353
ENST00000251334.6	7.06191	6.41399	7.29339	3.62034	3.14253	4.96354
ENST00000251343.9	0.024287	0.033715	0.023128	0.00965	0.0732	0.007057
ENST00000251363.9	2.06131	5.6006	1.74195	10.6929	6.46654	3.32541
ENST00000251366.7	0	0	0	0	0	0.007319
ENST00000251372.7	0	0.092533	0	0	0	0
ENST00000251376.7	0.098637	0.103622	0.034302	0.171793	0.125767	0.024214
ENST00000251412.7	0.614715	0.792282	0.827448	0.929665	1.39376	1.31314
ENST00000251413.7	22.4098	22.0328	33.5441	11.0318	10.7528	30.214
ENST00000251453.7	357.249	399.946	333.001	177.766	117.485	634.297
ENST00000251472.8	0.122324	0.045216	0.067166	0.003776	0	0.040352
ENST00000251473.9	0	0.213169	0	0	0	0.005146
ENST00000251496.6	0.986997	1.73351	1.70573	0.581783	1.63633	2.00914
ENST00000251507.8	8.63422	7.2293	6.5269	4.47695	4.82513	6.11682
ENST00000251527.9	0.215914	0.040173	0.036374	0.137606	0	0.057194
ENST00000251535.10	76.8087	31.3311	16.7828	243.867	165.395	28.7904
ENST00000251547.9	0.396673	0.225663	0	0	0	0
ENST00000251588.6	5.18556	3.43407	3.9846	0	0.733748	2.76884
ENST00000251595.11	26.8557	108.813	130.828	54.6867	220.671	111.131
ENST00000251607.10	0.149519	0	0.109555	0.103806	0	0
ENST00000251630.10	0	0	0.027187	0.02634	0	0
ENST00000251636.9	6.52963	3.23623	5.16589	7.26173	7.57015	12.1642
ENST00000251642.7	1.5366	1.29004	0.696236	1.24979	1.05159	1.0401
ENST00000251645.2	0	0	0.005413	0	0	0
ENST00000251654.8	0	0	0	0	0	1.12195
ENST00000251691.4	0.007282	0.019549	1e-06	0	0.028881	0.003278
ENST00000251722.10	0.044508	0	0.177296	0	0	0.064534
ENST00000251739.9	0	0.737768	0	0	0.407828	0.787104
ENST00000251775.8	0	0	0	0.095495	0	0
ENST00000251809.4	0.146423	0.12216	0.328201	0.159104	0.047826	0.301411
ENST00000251810.7	0.215299	0.082747	0.035755	0.176209	0.087937	0.188037
ENST00000251822.6	0.479549	0.036491	0.241897	0.095715	0	0.211281
ENST00000251849.8	0	0	0	0	0	0.099568
ENST00000251864.6	0	0.030725	0	0	0	0.079917
ENST00000251871.8	0.035961	0.049821	0.061715	0	0	0.126446
ENST00000251879.10	4.45204	3.4133	2.37239	3.42501	2.57358	1.88972
ENST00000251900.8	7.39042	7.17969	5.88424	4.30657	3.34624	6.17066
ENST00000251968.3	0	0.125609	0	0	0	0.095369
ENST00000251973.9	0.068305	0.03984	0	0	0	0.014989
ENST00000252011.7	0	0	0	0	0.414591	0
ENST00000252015.2	12.5982	9.19308	6.24484	15.2286	14.563	10.9872
ENST00000252029.7	0	0	0	5.90419	6.25636	1.7478
ENST00000252032.9	1.46609	1.16453	0.819961	1.09093	1.5714	0.982571
ENST00000252050.8	0.580745	0.936524	1.47276	0.864269	0	1.06774
ENST00000252071.8	0	0	0.06618	0	0	0.033873
ENST00000252085.3	0	0	0	0.027962	0	0
ENST00000252100.6	0	0	0	1.11878	0.962339	0.590947
ENST00000252102.8	0	0	0	3.78425	0	0
ENST00000252108.7	4.5048	6.77708	4.73455	1.53913	4.60447	5.83668
ENST00000252115.9	0	3.50483	0	0	0	0
ENST00000252134.11	0	0.504571	0	0	0	0.429349
ENST00000252136.11	0.375111	0.299986	0.095463	0	0.423199	0.040229
ENST00000252137.10	0.010078	0.008399	0	0	0	0
ENST00000252207.9	5.00551	0	0	0	0	0
ENST00000252211.6	0.206169	0	0.126934	0.365352	0.402529	0.113159
ENST00000252244.3	1.67512	1.08631	0.436554	0.040717	0	0
ENST00000252245.5	0	0.014109	0.044354	0	0	0
ENST00000252250.6	0	0.066817	0	0	0	0
ENST00000252252.3	0	0.059318	0	0	0	0
ENST00000252268.8	11.9654	11.9029	12.8158	14.3046	13.8605	10.8866
ENST00000252288.7	1.36665	0	3.3844	1.71503	2.72359	1.26963
ENST00000252318.6	0.032303	0	0	0	0	0
ENST00000252321.4	0.06586	0	0	0	0	0
ENST00000252329.3	3.80458	4.6136	1.27814	1.93789	2.21175	1.42447
ENST00000252336.10	0	0	0	0	0	0.021916
ENST00000252338.4	0.028593	0	0	0	0	0
ENST00000252440.11	0	0.865314	0	0	0	0
ENST00000252444.9	0.333976	0.367258	0.048029	0.183816	0.269	0.120269
ENST00000252445.7	1.6641	1.49564	2.60322	2.02746	2.09784	4.54304
ENST00000252457.9	4.95598	11.6328	13.719	9.82842	9.43033	8.79877
ENST00000252482.8	11.9205	8.32912	20.1072	16.4451	15.1531	16.4098
ENST00000252483.9	17.6206	17.3539	20.7652	16.0903	18.4435	17.5197
ENST00000252485.8	25.1407	15.3083	14.9044	24.6918	22.2876	20.1677
ENST00000252486.8	11.1767	10.8876	6.87856	2.18869	0.143676	0.020261
ENST00000252487.9	0.936076	0.675844	0.198749	0.948014	0	0.917614
ENST00000252506.10	2.82224	2.85319	1.10554	5.94937	3.67081	3.91908
ENST00000252512.13	1.80991	0.838018	0	4.28085	4.5875	3.35013
ENST00000252519.7	0	0.018499	0.030258	0	0	0
ENST00000252527.8	0.214577	0	0	0	0.889997	0
ENST00000252530.9	1.68444	0.889223	1.59818	2.69389	3.82629	1.26709
ENST00000252542.8	16.1474	11.99	10.705	15.0386	13.1614	14.5549
ENST00000252575.10	0.005972	0	0	0	0	0.003682
ENST00000252590.8	1.22081	1.79088	0.737916	0	0	0.036003
ENST00000252593.6	14.9684	12.2273	1.91196	2.80576	0.646733	0.177366
ENST00000252594.10	1.99131	1.24561	0.587745	0	0	0.089805
ENST00000252595.11	0.138985	0.35619	0.205214	0.398793	0.179936	0.12612
ENST00000252597.7	0	0.02589	0	0.018898	0.026713	0.045727
ENST00000252599.8	6.9813	7.33758	5.81524	2.60988	3.27852	5.36126
ENST00000252602.1	0.07103	0.213257	0.440786	0.393898	0.074623	0.275785
ENST00000252603.6	24.8812	29.8871	36.9776	11.4725	6.85332	37.3142
ENST00000252622.14	117.541	101.317	140.411	94.7205	74.2638	156.178
ENST00000252655.1	1.31558	0.947012	1.21131	1.81972	1.68901	1.64861
ENST00000252660.5	0.018178	0.05186	0.013683	0.044523	0.089843	0.034791
ENST00000252674.8	8.16832	6.75214	8.22321	6.85619	5.7782	7.47345
ENST00000252699.6	0	0	0	0	0.036247	0
ENST00000252711.6	0.04381	0.008051	0	0	0	0.003053
ENST00000252713.8	0	0	0	0.148233	0	0
ENST00000252725.10	2.86716	1.63945	1.19023	3.52135	12.0019	7.37524
ENST00000252744.5	2.98428	2.46783	1.27234	2.16265	3.00645	1.41834
ENST00000252785.3	0	0.832761	1.05002	0	0	1.81409
ENST00000252797.6	0.743085	0.794697	0.485242	0.473572	0.521673	0.217149
ENST00000252799.3	0.505683	0.583667	0.416629	0.532614	0	0.323279
ENST00000252804.8	3.8372	2.58655	1.19885	0.969825	0.760835	0.749148
ENST00000252809.3	12.9325	3.91415	4.18559	23.8892	10.4038	5.04775
ENST00000252813.5	0.171115	0	0	0.169355	0	0.040868
ENST00000252816.10	0	0	12.8327	3.2172	12.0922	12.6933
ENST00000252818.4	66.4741	33.7583	42.6695	76.372	38.5689	46.1594
ENST00000252825.8	0.863554	0.412397	0.608401	1.37321	0.8699	0.232059
ENST00000252826.9	0.190493	1.04917	1.61956	0	0	0
ENST00000252840.10	7.15721	6.40218	3.58655	5.26024	5.24533	4.52507
ENST00000252891.8	0.186614	0.172846	0	0.180643	0	0.252316
ENST00000252898.11	0	0.095885	0	0.177277	0	0
ENST00000252934.9	1.29589	3.16921	4.65651	1.12414	0.760994	3.41893
ENST00000252936.7	1.36918	2.8562	6.65598	0.920388	1.96106	2.85185
ENST00000252945.7	0.120871	0.222117	0	0	0	0
ENST00000252951.2	0	0	0.715576	0	0	0
ENST00000252979.5	3.63966	2.52508	1.39898	2.79984	2.21025	1.46487
ENST00000252984.11	3.52695	1.01512	1.36031	4.89739	7.0163	2.83572
ENST00000252992.8	0.390469	0.346039	0.292503	0.842356	0	0.59004
ENST00000252996.8	2.79543	2.04372	2.29771	1.76351	1.56725	1.71562
ENST00000252997.2	0.088987	0.157872	0.006612	0.019242	0.180799	0
ENST00000252999.7	0.822145	0.213635	0.032747	0.492928	0.263727	0.075833
ENST00000253003.6	96.2084	73.3649	125.779	107.998	76.2134	106.968
ENST00000253008.2	0.062071	0	0.020798	0	0	0.028703
ENST00000253023.7	38.7952	34.0119	21.812	54.4129	40.8189	46.5883
ENST00000253024.9	53.0785	46.0169	40.728	43.482	41.7513	71.8652
ENST00000253031.6	0.416313	0.227912	0.109732	0.20028	0.194041	0.223306
ENST00000253039.8	28.6904	28.3737	28.3494	23.6637	24.0801	26.122
ENST00000253047.6	22.6394	15.3611	29.0325	14.7769	7.60218	18.0393
ENST00000253048.9	6.9608	6.01836	5.95133	4.98345	5.00354	6.2657
ENST00000253054.12	111.338	98.2052	147.531	242.07	217.435	69.6424
ENST00000253055.7	0.048674	0.266649	0.154359	0.37043	0.403825	0.068403
ENST00000253063.3	20.5718	14.6123	1.74402	23.5213	17.9877	2.01712
ENST00000253079.10	0	0.055093	0	0	0	0
ENST00000253083.8	0.096722	0.090555	0.722218	0.127553	0.013191	0.197266
ENST00000253099.10	4.30977	1.53583	1.60067	0	0	3.1292
ENST00000253107.11	11.2356	12.5665	3.15197	4.14861	0.511376	3.43706
ENST00000253108.8	94.9259	75.1407	100.893	51.2899	31.3185	57.0655
ENST00000253109.4	3.25629	2.00664	0	0.436565	0	1.27798
ENST00000253110.15	0.641564	1.67195	0	0	0	0
ENST00000253115.6	0.272116	0.269481	0.049571	0.116852	0.197979	0.12079
ENST00000253122.9	4.00146	2.95364	0.303994	5.05347	4.99446	0.16037
ENST00000253159.12	0	0	0.092915	0	0	0
ENST00000253193.8	0.275213	0.752084	0.467652	2.16655	1.32753	0.654589
ENST00000253233.5	0.771895	0.363851	0.873885	0.744865	0	0.670543
ENST00000253237.9	1.80994	2.0907	2.77722	0.691428	0.643474	1.60253
ENST00000253247.8	0	0.275606	0	0	0	0
ENST00000253251.12	10.2799	8.26238	8.31088	7.25141	6.28792	8.25243
ENST00000253255.6	0	0	0	0	0	0.003055
ENST00000253270.11	2.50276	1.60594	2.77648	3.82658	3.13689	3.52002
ENST00000253320.8	0.030022	0	0.008059	0.031404	0.002454	0.009257
ENST00000253329.2	18.8333	17.3756	9.90047	17.1145	17.6694	11.9922
ENST00000253332.5	1.26365	0	0.060115	0.251116	0.105606	0.237046
ENST00000253339.9	0.121993	0	0	0	0	0.162396
ENST00000253382.5	4.71798	5.41279	13.6231	11.0501	9.71898	10.3588
ENST00000253392.5	0.153027	0.212774	0.146247	0.053134	0.352489	0
ENST00000253413.9	0	0	0	0	0	0.462794
ENST00000253451.8	0.041095	0	0	0	0	0.025338
ENST00000253452.6	215.822	202.021	221.042	256.741	250.363	351.697
ENST00000253457.7	0	0	0.409284	0.533734	0.755259	0
ENST00000253458.11	2.01228	1.32887	0.723473	0.705764	0.963548	0.740517
ENST00000253461.8	0	1.01022	0	1.63776	0	0
ENST00000253462.7	8.60459	6.91359	11.1804	1.92143	1.86707	5.37861
ENST00000253496.3	0.254212	0.304497	0.104171	0.358014	0.026414	0.24919
ENST00000253506.9	0	0	0	0.378541	0	0.214077
ENST00000253577.8	0	1.8858	0	0	5.44193	3.0689
ENST00000253669.9	0	0	0	3.88318	0	9.79514
ENST00000253673.5	0.412096	0.444998	0	0	0	0
ENST00000253686.6	0.75786	0.532612	0.332232	0.319527	0.252627	1.16525
ENST00000253692.11	0.055944	0.099582	0.023246	0	0.030702	0.035377
ENST00000253693.6	3.63025	2.49569	2.47113	2.43274	3.61083	2.68569
ENST00000253699.7	0.707876	0.996481	0.173252	0.27456	0.160245	0.287316
ENST00000253778.12	0.086751	0.050775	0.077515	0.03755	0.040632	0.007641
ENST00000253788.10	277.574	341.191	729.608	169.507	128.794	499.528
ENST00000253794.6	50.9746	62.5822	51.7164	95.3393	58.1593	74.4965
ENST00000253799.7	0	0	0	0.04378	0	0
ENST00000253801.6	0.484236	0.339893	0.132069	0.10115	0.024651	0.07377
ENST00000253803.6	0.394932	0.64557	0.326402	0.357731	0.262666	0.289816
ENST00000253811.10	0.439246	0	0.112367	0	0	0.070023
ENST00000253814.5	19.2945	21.9227	12.8009	12.2704	12.9228	11.0836
ENST00000253815.3	80.6227	109.034	136.259	72.1467	50.818	103.168
ENST00000253861.4	1.5224	0.831103	6.00792	7.71404	7.76445	4.04197
ENST00000253925.11	0	0.414835	0.553014	0.944801	0.268102	0
ENST00000253928.13	0.695563	0.849695	0	0.651963	0.144966	0.702347
ENST00000253934.9	0	0.112667	0	0	0	0.020441
ENST00000253952.9	12.3917	21.5537	26.5864	3.24094	2.57882	6.66163
ENST00000254029.7	3.04312	2.21372	0.705214	0	0	2.57961
ENST00000254037.6	0.25522	0.139645	0.005035	0.248749	0.074369	0.042139
ENST00000254051.10	0	0.074389	0	0	0	0
ENST00000254066.9	0	0.034032	0	0	0.179952	0.032059
ENST00000254090.8	0.493129	1.89936	1.00412	2.4632	5.00825	3.07014
ENST00000254101.3	0.227445	0.305221	0.309985	0.358384	0.411374	0.344788
ENST00000254108.11	0.447604	0.20431	0.088615	0.029713	0	0.044426
ENST00000254166.3	1.09948	1.27033	0.732813	0.916741	1.05777	0.371273
ENST00000254182.11	0.584933	0.240363	0	0	0	0.714531
ENST00000254190.3	3.72575	3.04272	2.41947	4.65952	5.59539	2.89812
ENST00000254193.10	0	19.3659	9.02902	12.0851	12.5567	15.0084
ENST00000254235.7	5.04659	3.30825	4.49614	2.14795	1.78218	0.407631
ENST00000254250.7	3.66603	3.93388	3.67523	3.26968	4.52136	3.88942
ENST00000254260.7	0.017234	0	0.041426	0	0	0.037062
ENST00000254262.9	0	0.848303	1.70516	0	0	0.72747
ENST00000254286.8	0	0	0	0	0	0.072847
ENST00000254301.13	3.28588	9.8113	2.42981	6.12137	3.09638	0.273871
ENST00000254302.5	0	0.102058	0.242163	0.05234	0	0.152493
ENST00000254320.7	0	0.163251	0	0	0	0
ENST00000254321.9	4.07129	0.785447	2.53389	1.71877	1.2442	2.66361
ENST00000254322.2	8.26572	2.24139	3.60897	7.8105	2.60572	3.11053
ENST00000254323.6	0.504624	0.50757	0.142952	0.190758	0.34567	0.11989
ENST00000254325.8	3.33347	2.45221	2.74154	3.0935	3.64562	2.37536
ENST00000254337.10	15.9191	18.313	16.6578	11.2511	12.9692	11.8082
ENST00000254351.8	0	0	0	0	0	0.011263
ENST00000254436.7	14.5876	12.2653	10.1746	9.9224	9.0756	11.2614
ENST00000254442.7	0.009058	0.020953	0	0	0.007213	0
ENST00000254480.9	0.029736	0.037375	0.027727	0.027991	0.060324	0.008822
ENST00000254488.6	0.008934	0	0	0.038685	0.033446	0.021947
ENST00000254508.6	20.1394	17.5189	13.6432	8.15353	7.98256	9.8542
ENST00000254521.7	11.6962	12.7273	39.2742	9.84369	7.81598	30.8576
ENST00000254528.3	5.63607	4.34467	0.739713	0.760883	0.110609	0.072903
ENST00000254579.10	2e-06	2e-06	1e-06	1e-06	1e-06	1e-06
ENST00000254584.6	0	0.670526	0	0.240721	0	0
ENST00000254605.10	0.091543	0.12111	0.02216	0.029245	0.015468	0.03934
ENST00000254616.10	1.21295	0.992308	0.31425	1.07553	0.837689	0.61052
ENST00000254624.9	0.032006	0	0.069498	0.032056	0.054733	0.113627
ENST00000254630.11	1.92684	2.35373	1.69943	0.826979	0.685396	1.38615
ENST00000254636.9	0	0	0	0	3.01318	0
ENST00000254644.12	0.109983	0	0	0.4965	0	0.218131
ENST00000254654.7	14.996	17.6101	18.9012	2.60987	14.0218	16.0995
ENST00000254657.7	3.52145	2.08465	1.5066	1.66639	1.13664	1.15406
ENST00000254661.4	2.10978	2.8426	0.434906	5.0454	4.97333	2.84767
ENST00000254663.10	0	0	0	0	0	0.149307
ENST00000254667.7	0.124414	0.107804	0.366098	0.372025	0	0
ENST00000254691.9	2.66264	2.77577	2.91964	2.649	2.64137	2.91066
ENST00000254718.8	0.049696	0	0	0	0.091857	0
ENST00000254719.9	27.6494	27.5407	30.2311	16.01	15.1321	22.291
ENST00000254722.8	1.33491	1.27274	1.14629	0.645754	0.151688	0.065007
ENST00000254742.6	0.29047	0.776267	0.712234	0.371792	0.987928	0.078464
ENST00000254759.7	3.62538	5.25388	6.82878	1.01845	1.74311	4.05715
ENST00000254770.2	0.251917	0.414696	0.465731	0.274053	0.375895	0.290876
ENST00000254799.10	0.230787	0.149917	0.067178	0.087795	0	0.075491
ENST00000254803.3	24.8936	19.4848	17.2551	17.9157	13.2258	18.6531
ENST00000254806.7	0	0	0	0	0	0.015854
ENST00000254810.8	4.57143	4.76884	2.11597	3.55714	2.346	5.47053
ENST00000254816.5	0.860419	0.634563	0.182462	1.41805	0.455976	0.2779
ENST00000254846.9	0.022777	0.077067	0.113893	0.068204	0	0.006625
ENST00000254850.11	0	0	0	0.055722	0	0
ENST00000254853.10	0.073242	0.134987	0.018735	0.048873	0.136991	0.011994
ENST00000254854.4	0.031048	0.076324	0	0	0	0
ENST00000254868.8	0	0.237354	0.479768	0	0	0
ENST00000254878.7	1.57403	3.1329	2.6347	0.364397	0.739024	1.88633
ENST00000254908.10	3.82652	4.69327	2.14599	4.56745	2.1758	3.86963
ENST00000254928.9	7.80042	10.0855	11.9099	6.45052	8.49216	13.2878
ENST00000254940.9	3.3576	2.89812	0.741375	0.667178	0.441691	1.5631
ENST00000254942.7	4.09737	3.24282	4.1571	5.83284	4.20789	3.89837
ENST00000254950.12	3.27703	3.39917	3.18643	3.91839	3.80302	2.70526
ENST00000254958.10	0.347313	0.85508	0.177338	0.19605	1.03271	0.348708
ENST00000254977.7	0	0	0	0	0	0.631151
ENST00000254998.2	24.5395	25.1137	25.602	14.6783	8.73001	17.1419
ENST00000255006.10	0.177401	0.049202	0	0	0	0
ENST00000255008.4	0.027162	0	0	0.18811	0.254437	0.041868
ENST00000255078.7	2.91372	3.27238	1.78404	1.99276	1.5082	1.44953
ENST00000255082.7	0.029876	0.037441	0	0	0	0
ENST00000255087.9	0.431506	0.692291	0.312329	0.047175	0.173204	0.042556
ENST00000255108.7	0.051452	0	0	0	0.095724	0.121334
ENST00000255152.2	4.24832	4.36559	3.74656	4.3007	4.75092	3.28916
ENST00000255174.2	25.897	26.9811	13.893	20.8424	22.1882	13.0631
ENST00000255175.5	198.074	186.524	101.185	181.239	216.666	99.7257
ENST00000255189.7	0	0	0	0.026708	0	0
ENST00000255192.7	0.036599	0.029208	0	0	0	0.043872
ENST00000255194.10	0.259842	0.095302	0.252517	0.164685	0	0.269237
ENST00000255198.2	0.604603	0.921818	0.292533	0.400109	0.249648	0.253861
ENST00000255226.10	0.322467	0.163884	0.054301	0.047934	0	0.036886
ENST00000255262.3	0	0.030445	0	0	0	0.011454
ENST00000255304.8	1.16361	1.19855	0.802095	0.996489	0.850224	0.974784
ENST00000255305.10	4.68581	3.81741	3.09223	0.83491	0.900206	1.92039
ENST00000255320.6	474.193	571.946	788.486	493.184	346.534	730.624
ENST00000255380.8	0.005527	0	0	0	0	0
ENST00000255389.9	0	0	0	1.10261	1.41827	0.143606
ENST00000255390.9	0.341604	0.341407	0.302091	0.203046	0.181531	0.209675
ENST00000255409.7	5.87514	9.09623	0.837164	4.46563	0.605281	0
ENST00000255427.7	0.909191	1.12392	0	0.199035	0.374067	0.014922
ENST00000255476.2	4.97391	4.34923	2.16252	1.22819	1.07884	0.998239
ENST00000255495.7	0.947044	0.507534	1.168	1.05072	0.617074	1.28393
ENST00000255499.2	0	0	0.048679	0	0	0
ENST00000255559.7	0.033366	0	0	0.098297	0.851098	0
ENST00000255608.8	10.3629	11.1247	9.70384	8.8975	9.86978	9.37553
ENST00000255613.7	1.70673	0	1.2248	0.78732	1.74202	0.860068
ENST00000255616.8	3.13506	1.15588	3.22006	2.84275	0.841777	1.9134
ENST00000255622.10	0	0.060668	0.087362	0	0	0.021958
ENST00000255631.9	0	0.197914	0	0.075964	0	0.277499
ENST00000255641.12	3.79721	3.60734	2.70316	3.16503	3.98728	2.39628
ENST00000255674.11	0.352162	0	0	0	0.313318	0
ENST00000255681.6	17.2678	16.6675	11.5722	6.02378	4.70339	6.65732
ENST00000255684.9	0	0.136246	0.09523	0.627974	1.09848	0
ENST00000255688.7	0	1.21002	0	0	0	0.292654
ENST00000255746.7	0.077863	0	0	0.036816	0.280501	0
ENST00000255759.10	0.170069	0	0	0	0.123578	0
ENST00000255764.3	22.0223	26.0628	27.3835	25.9401	23.4518	31.4804
ENST00000255784.5	5.96238	7.13047	8.24307	4.609	3.3392	6.32001
ENST00000255830.7	0	0	0	0.284113	0	0
ENST00000255858.11	0.137821	0.405818	0.012266	0	0.12449	0.08279
ENST00000255882.10	22.3138	17.3553	17.5177	19.0259	18.8904	14.4278
ENST00000255977.6	0	0	0	0.025355	0.075615	0
ENST00000256010.6	14.711	1.10756	0.800482	0.51703	0	0.232573
ENST00000256015.4	4.6455	2.72495	1.26746	2.31029	1.90371	0.566247
ENST00000256078.8	20.6423	23.1134	23.7993	37.8516	40.8312	42.1428
ENST00000256079.8	0.713327	0.939476	0.700284	0.938166	0.978368	1.38788
ENST00000256103.2	0	0	0.03318	0	0	0
ENST00000256108.9	0.020564	0.037077	0	0	0.093027	0
ENST00000256117.9	0	0.017448	0	0.026338	0.087458	0.048558
ENST00000256151.7	0.081514	0.185954	0	0.016171	0.130464	0.072038
ENST00000256178.7	0.345344	0.166861	0.120279	1.23631	2.34749	0.211616
ENST00000256190.12	0.232838	0.16986	0.188199	0.055452	0	0.205913
ENST00000256196.8	1.11854	0.739835	0.677847	1.03248	1.29145	1.01805
ENST00000256255.10	0.178545	0	0.225965	0	0	0
ENST00000256257.1	6.58676	6.1079	6.42976	11.5115	8.85874	8.67618
ENST00000256319.6	25.4814	23.3184	73.4244	39.1716	31.6727	76.4644
ENST00000256324.14	0.602214	0	0	0	0	0.151394
ENST00000256339.8	0.054434	0.044604	0.044585	0.074611	0.014872	0.019578
ENST00000256343.7	0	0.004881	0	0	0.047011	0.003257
ENST00000256362.4	0.048409	0.084457	0.005077	0.031909	0.103404	0.033584
ENST00000256366.5	0.06031	0.075816	0.061704	0.030454	0.010363	0.051968
ENST00000256367.2	0.585535	0.689707	0.300837	0.636788	0.596496	0.273023
ENST00000256379.9	0	0.042151	0	0	0	0
ENST00000256383.8	0.165266	0.166831	0.257986	0.196193	0.115135	0.278989
ENST00000256389.3	0	0	0.006133	0	0	0
ENST00000256398.12	0	0	0	0.026749	0	0.015702
ENST00000256404.7	0.087695	0	0	0.132855	0	0
ENST00000256412.8	0.778962	1.51904	0	0.605608	0	0
ENST00000256413.7	0.292077	0.10206	0.008	0.444363	0.272983	0.227571
ENST00000256425.6	0.035039	0.040815	0	0.004154	0	0
ENST00000256429.7	0.147419	0.161488	0.025063	0.124292	0.143565	0.088653
ENST00000256433.5	0.049589	0.088656	0.016335	0.050311	0	0.019463
ENST00000256441.4	4.02312	2.96823	4.86729	2.04496	2.24623	4.07288
ENST00000256442.9	0.249586	0.035197	0.815547	0.161	0.268732	0.72836
ENST00000256447.5	0.399035	0.702587	0.084556	0.078461	0	0.004589
ENST00000256458.4	6.03841	4.46209	2.29734	18.7469	22.9498	4.78744
ENST00000256460.7	72.753	57.4935	87.5675	81.4183	61.775	89.3683
ENST00000256474.2	7.99047	7.50282	1.88258	4.74828	3.85642	1.89655
ENST00000256495.3	13.1357	9.4375	4.89811	15.5395	13.5038	5.52901
ENST00000256497.8	1.57058	1.15085	0.842993	1.39453	1.86635	1.2424
ENST00000256538.8	0.406068	0.265644	0.67641	0.358483	0.242891	0.831513
ENST00000256544.7	0	0	0.166197	0.126704	0.107568	0.22134
ENST00000256545.8	16.6185	18.9165	19.2025	13.5672	12.3626	14.5357
ENST00000256578.7	0.138455	0.108096	0	0	0	0
ENST00000256585.9	0.08578	0	0	0	0	0
ENST00000256593.7	1.08838	4.3679	1.06328	0.5085	4.21047	1.62093
[truncated: 101,268 more rows]

## Sheet: Plt ribo-seq
Name	TPM_PLT_R	TPM_PLT_T1	TPM_PLT_T2
ENST00000000233.9	0.59314	0.525913	0.517234
ENST00000000412.7	0.10041	0.095218	0
ENST00000001146.6	0.003386	0	0.005906
ENST00000002165.10	0.247789	0.026374	0.441638
ENST00000003100.12	0.006696	0.024187	0
ENST00000003302.8	0.003956	0	0.006901
ENST00000003583.12	0	0.089018	0
ENST00000003912.7	0.059038	0.029086	0.081375
ENST00000005257.6	0.049294	0.113626	0
ENST00000005259.8	0.025772	0.073511	0
ENST00000005558.8	3.39189	2.83042	3.82955
ENST00000009041.11	0.015003	0.021962	0
ENST00000009180.9	6.76288	4.48115	8.28507
ENST00000009589.7	1.66064	1.65963	1.77429
ENST00000011473.6	0.256797	0.19852	0.301641
ENST00000011619.5	6.26195	5.251	7.0135
ENST00000013070.10	0.020109	0	0.022552
ENST00000013125.8	0.861953	0.513958	1.09477
ENST00000017003.6	0.009305	0.010728	0
ENST00000022615.8	10.8149	11.8412	9.47097
ENST00000023939.8	0	0	0.326267
ENST00000025301.3	0.033813	0.018862	0.04493
ENST00000025399.10	0	0	0.701642
ENST00000028008.9	0	0	0.063642
ENST00000031146.8	0.024516	0.031264	0
ENST00000033079.7	0.078805	0.043046	0.102725
ENST00000035307.6	0.024781	0	0.070335
ENST00000037243.6	14.6489	13.0183	15.729
ENST00000037869.7	0.062594	0	0.109168
ENST00000040738.9	0.003023	0.003542	0
ENST00000040877.1	0.056198	0.007315	0.092567
ENST00000044462.11	0.014484	0.009833	0.015904
ENST00000045347.11	0.144179	0.200618	0
ENST00000046794.9	0.062249	0.150176	0
ENST00000053468.3	0.007956	0.017932	0
ENST00000054666.10	0.565571	0.483304	0.627009
ENST00000055682.11	0	1e-06	0
ENST00000060969.5	0.015005	0	0.025064
ENST00000066544.7	0.058756	0	0.093191
ENST00000070846.10	0.011389	0.017894	0.006594
ENST00000075120.11	0.536164	0.515897	0.582933
ENST00000156471.9	0.003154	0	0.005557
ENST00000157600.7	0.013983	0.005229	0.014115
ENST00000158771.8	0.004554	0.010361	0
ENST00000160740.7	0.3535	0.312889	0.383614
ENST00000161863.8	0.018613	0.025942	0.012455
ENST00000163416.6	0.178759	0	0.292871
ENST00000165698.9	0.11092	0	0.153704
ENST00000166345.7	0.006026	0	0.010509
ENST00000170564.6	0.008139	0	0
ENST00000171757.2	0.108951	0.037629	0.180593
ENST00000171887.8	0.064501	0.004581	0.113149
ENST00000172853.14	2e-06	0	4e-06
ENST00000173527.5	0.069701	0.024752	0.1016
ENST00000173785.4	0.068196	0.15978	0
ENST00000174618.4	0.007578	0.016746	0
ENST00000175091.4	0.137608	0.085976	0.175997
ENST00000175756.9	1.36562	1.22772	1.53027
ENST00000176763.9	0.008736	0.018583	0
ENST00000184266.2	1.41496	1.52472	0.989308
ENST00000185150.8	0.04134	0	0.077996
ENST00000186436.9	0.317917	0.225767	0.382887
ENST00000191018.9	2.48632	1.48842	3.72667
ENST00000192788.5	38.0102	36.8551	38.8589
ENST00000193322.7	0.122461	0.020956	0
ENST00000193403.10	0.981755	1.23906	0.680661
ENST00000194214.9	0.195894	0	0
ENST00000196371.9	0.072906	0.035639	0.099105
ENST00000196489.3	0.018869	0.04421	0
ENST00000199320.8	0.58526	0.580141	0.588879
ENST00000199389.10	2.7712	1.54945	3.6869
ENST00000199448.8	0.044082	0.116151	0.016243
ENST00000199706.12	0.074489	0.06981	0.077948
ENST00000199708.2	0.376942	0.588775	0.219136
ENST00000200453.5	0.08783	0.165882	0.027961
ENST00000200557.10	0.078674	0.075814	0.079498
ENST00000200639.8	0.918638	0.586034	1.17696
ENST00000202017.5	0.016177	0.037901	0
ENST00000202677.11	0.049419	0.048752	0.049899
ENST00000202773.13	0.390641	0.203218	0.539049
ENST00000202834.11	0.411426	0.604296	0.286218
ENST00000203166.9	0.011354	0.008771	0.013299
ENST00000203556.8	0.017405	0.041265	0
ENST00000204679.8	0.088589	0.09548	0.085288
ENST00000204961.4	0.05839	0.068403	0.050917
ENST00000205557.11	0.145065	0.132956	0.149919
ENST00000205636.3	1.42365	1.08826	1.68496
ENST00000206262.1	0.010703	0.046439	0
ENST00000206423.7	0.004057	0.005969	0.002504
ENST00000206595.10	0.021739	0.035003	0
ENST00000207549.8	0.009593	0.023841	0
ENST00000209884.4	0.079818	0.011	0.131018
ENST00000210227.4	0.666464	0.548532	0.691837
ENST00000211998.9	2.3732	1.752	2.85685
ENST00000212015.10	0.004725	0.010132	0
ENST00000215587.11	0.306645	0	0.668971
ENST00000215730.11	0.243419	0.148408	0.299417
ENST00000215793.12	0.095659	0.02573	0.147569
ENST00000215794.7	0.015167	0.035537	0
ENST00000215829.7	0.029987	0	0.064527
ENST00000215832.10	0.177681	0.192193	0.173608
ENST00000215909.9	0.269929	0	0.313847
ENST00000216019.11	0.019986	0.050103	0
ENST00000216034.5	0.015839	0	0.027624
ENST00000216039.9	0.011681	0.026868	0
ENST00000216061.9	0.104718	0.069442	0.127489
ENST00000216099.12	0	0.032501	0
ENST00000216106.5	0.015854	0.037146	0
ENST00000216144.3	0.134344	0.151267	0.121269
ENST00000216181.10	1.03524	0.9335	1.1165
ENST00000216218.7	0.076684	0.06373	0.078915
ENST00000216225.8	15.0315	16.9733	13.7583
ENST00000216252.3	0.101949	0.042855	0.131388
ENST00000216268.5	0.003513	0.009692	0
ENST00000216277.12	0.503053	0.734954	0.33005
ENST00000216281.12	0.136555	0.150604	0
ENST00000216286.9	0.012846	0	0.01365
ENST00000216288.11	0	0	0.408741
ENST00000216294.4	0.078927	0.163234	0
ENST00000216297.6	0.028664	0.017576	0.036273
ENST00000216367.9	0	0.309415	0
ENST00000216378.2	0	0	0.061044
ENST00000216392.7	2.2616	0	2.95485
ENST00000216416.8	0.004954	0.010279	0
ENST00000216420.11	0.019228	0	0.043293
ENST00000216455.8	0.338487	0	0.501789
ENST00000216456.6	0.456622	0.32079	0
ENST00000216468.7	0.023308	0.048008	0.01077
ENST00000216484.6	0.04508	0.075289	0.026846
ENST00000216517.10	0.274052	0.280804	0.302164
ENST00000216520.6	0.329301	0	0.585176
ENST00000216727.8	0.299453	0.093606	0.438998
ENST00000216832.8	0.052863	0.074016	0.02007
ENST00000216962.8	0.248805	0.199975	0.285057
ENST00000217026.4	0.091528	0.071482	0.106419
ENST00000217109.8	0.008246	0.019963	0
ENST00000217133.1	39.8992	35.2287	43.3661
ENST00000217402.2	0.856862	0.553819	1.08216
ENST00000217652.7	3.64767	2.20057	4.63825
ENST00000217893.9	0.063498	0	0.088595
ENST00000217926.5	0.036823	0	0.064221
ENST00000217958.7	0.103515	0.040929	0.139446
ENST00000217971.7	38.985	42.6996	36.3996
ENST00000218089.13	0.117837	0.099715	0.117247
ENST00000218328.12	0.290237	0.225466	0.328171
ENST00000218340.3	0.071756	0.079121	0.066237
ENST00000218388.8	26.8906	22.6433	30.0737
ENST00000218516.3	1.00663	0.508325	0
ENST00000219070.8	0.020065	0.030963	0.017273
ENST00000219150.9	0.017955	0.042068	0
ENST00000219168.8	0.632258	0.34554	0.72429
ENST00000219169.8	0.010958	0	0.019763
ENST00000219439.8	0.078814	0.064239	0.081989
ENST00000219479.6	0.214323	0	0
ENST00000219689.11	0.107466	0.094421	0.117141
ENST00000219821.9	0.74799	0.665592	0.809248
ENST00000219905.11	0	1e-06	0
ENST00000220003.13	0.064381	0.032969	0.087883
ENST00000220244.7	0.011064	0	0.019297
ENST00000220514.7	0.369447	0	0.46024
ENST00000220531.7	0.57752	0	0.689147
ENST00000220592.9	1.14194	1.42586	0.935213
ENST00000220751.4	0.024933	0.058417	0
ENST00000220763.9	0.010009	0.019454	0.016771
ENST00000220822.11	0.083198	0.061557	0.09928
ENST00000220847.8	0	0	0.245799
ENST00000220853.7	0.102247	0	0.148969
ENST00000220931.10	0.004894	0	0.008536
ENST00000221086.7	0.033376	0.046205	0.020416
ENST00000221138.8	0.314166	0.092548	0.351233
ENST00000221200.8	0.008308	0.047477	0
ENST00000221249.10	0.364475	0.447308	0.302697
ENST00000221355.10	0.018154	0.042535	0
ENST00000221419.9	0.018666	0.017978	0.014919
ENST00000221476.3	0.019565	0.04584	0
ENST00000221494.9	0.306737	0.106595	0.451765
ENST00000221859.8	0	0.12663	0
ENST00000221930.5	1.77003	1.39635	2.06717
ENST00000221975.6	0.633032	0.57474	0.668431
ENST00000222002.3	0	0.019337	0
ENST00000222005.6	0.187686	0.37983	0
ENST00000222008.10	0.411673	1.02418	0
ENST00000222190.9	0.613296	0.669373	0.613545
ENST00000222219.7	0.029215	0	0.057722
ENST00000222266.2	0	0.065006	0
ENST00000222305.7	0.674389	0.29964	0
ENST00000222329.8	0.021518	0.050415	0
ENST00000222543.9	0.006634	0.015542	0
ENST00000222567.5	0.00407	0.009536	0
ENST00000222690.10	0.017992	0.033757	0
ENST00000222693.4	0.104458	0.081376	0.084065
ENST00000222718.6	0.022243	0.027941	0
ENST00000222803.9	0.031873	0.01653	0.042798
ENST00000223023.4	0.021687	0.033875	0.012608
ENST00000223073.6	1e-06	1e-06	1e-06
ENST00000223076.2	0.075046	0.118684	0
ENST00000223084.7	0.01258	0.029474	0
ENST00000223095.4	0.095726	0.106239	0.087869
ENST00000223122.3	0	0.130706	0
ENST00000223136.4	0.024992	0	0.039398
ENST00000223145.9	0.013447	0.031087	0
ENST00000223208.9	0.029777	0	0.023892
ENST00000223336.10	0.073897	0	0.142792
ENST00000223361.7	0.111724	0	0.194853
ENST00000223500.8	2.11587	1.53202	2.57038
ENST00000223642.2	0.049845	0.048049	0.048418
ENST00000224073.5	0.495238	0.244279	0.681886
ENST00000224140.5	0.232916	0.144927	0.285156
ENST00000224237.9	0.412081	0.395452	0.304249
ENST00000224784.10	0.181158	0.283413	0
ENST00000224807.9	0.067786	0.064093	0
ENST00000225174.7	0.115369	0.054111	0.165307
ENST00000225296.7	0.009353	0.024253	0
ENST00000225298.11	0.273258	0.280102	0.268074
ENST00000225388.8	0.021904	0.040381	0.010301
ENST00000225525.3	3.57977	3.21096	3.85312
ENST00000225538.3	0.22086	0.195798	0.239444
ENST00000225655.5	8.4559	6.84638	9.67231
ENST00000225719.8	0.00262	0	0.003249
ENST00000225964.9	0.002744	0	0.005268
ENST00000225972.7	0.038695	0.051806	0.028923
ENST00000226004.7	0.093658	0.091432	0.041716
ENST00000226230.7	0.007186	0.016934	0
ENST00000226279.7	0.002745	0.006983	0
ENST00000226328.8	0.028857	0	0.019627
ENST00000226522.8	0.210699	0.148181	0.086769
ENST00000226524.3	75.1628	70.6912	78.262
ENST00000227155.8	0.018659	0.050323	0
ENST00000227524.8	0.010027	0.028134	0
ENST00000227525.7	0.020041	0	0.034952
ENST00000227758.6	0	0	0.049366
ENST00000227868.8	0.236396	0.126988	0.32544
ENST00000228136.8	1.1017	0.883411	1.26329
ENST00000228140.6	0.792844	1.04995	0.601201
ENST00000228251.8	0	0	0.257958
ENST00000228280.9	0.439804	0	0.710244
ENST00000228506.7	0.036212	0	0.050524
ENST00000228515.5	0.021512	0	0.037518
ENST00000228567.7	0.003593	0.008419	0
ENST00000228741.7	0.580515	0.498038	0.618563
ENST00000228825.11	2.97359	2.26913	3.53391
ENST00000228827.7	0.070013	0.171605	0
ENST00000228865.2	0.08828	0.17029	0.035714
ENST00000228945.8	22.2389	16.9993	27.1244
ENST00000229214.8	0.010102	0.011863	0.008781
ENST00000229238.4	0.145381	0.340622	0
ENST00000229239.9	0.021049	0.104479	0
ENST00000229277.5	0.101779	0	0
ENST00000229314.9	0.196389	0.07905	0.274643
ENST00000229329.6	0.112201	0	0.211298
ENST00000229330.8	0.004779	0.010272	0
ENST00000229379.2	1.34915	2.33639	0.613823
ENST00000229402.3	0.112233	0.210366	0.039148
ENST00000229447.9	0.023415	0	0.040825
ENST00000229595.5	0.544181	0.367858	0.678612
ENST00000229633.6	116.794	98.5211	130.347
ENST00000229634.13	0	0.193938	0
ENST00000229758.7	0	0	0.082994
ENST00000229794.8	0.065936	0.039743	0.074438
ENST00000229812.7	0.435524	0.347152	0.501164
ENST00000229866.10	0	0.089361	0
ENST00000229971.2	0.351645	0.180921	0.478937
ENST00000230048.4	0.061032	0	0.058965
ENST00000230050.3	1.05534	1.2867	0.876634
ENST00000230085.12	0.604234	0.298545	0.782752
ENST00000230122.3	0.006844	0.006816	0.005603
ENST00000230124.7	0.041126	0.031198	0.047721
ENST00000230449.8	0.140522	0.16884	0.119397
ENST00000230461.10	0.031129	0.108021	0
ENST00000230859.7	0.095798	0.045784	0.135008
ENST00000230895.10	0.39385	0.423873	0.384545
ENST00000231004.4	0.003907	0.007355	0
ENST00000231061.8	1.67707	0.823094	2.30471
ENST00000231368.9	0.050338	0.010445	0.065917
ENST00000231461.9	0.073791	0.055046	0.071782
ENST00000231504.5	0.147642	0.543638	0
ENST00000231509.7	0.017435	0.010579	0
ENST00000231512.4	0.093561	0.096128	0.097214
ENST00000231524.13	0.079116	0	0.130462
ENST00000231572.7	0.254041	0.202071	0.284328
ENST00000232496.4	0.076659	0.094531	0.016712
ENST00000232564.7	0.065884	0.022288	0.10038
ENST00000232603.9	0.239904	0	0.419455
ENST00000232607.6	0	0	0.008641
ENST00000232905.3	4.48066	4.29812	4.61509
ENST00000233027.9	0.008294	0.01832	0
ENST00000233055.8	0.014505	0.020665	0.008767
ENST00000233084.7	0.043536	0	0.033702
ENST00000233099.5	0.217718	0.119883	0.274685
ENST00000233143.5	3.23973	3.91513	2.73591
ENST00000233154.8	0.345933	0.158581	0.465705
ENST00000233156.8	1.05193	1.01031	1.09764
ENST00000233190.10	0.005777	0.004588	0.006365
ENST00000233202.10	0.008602	0.00976	0
ENST00000233336.6	0.004008	1e-06	0.003741
ENST00000233379.8	0.003368	0.007892	0
ENST00000233468.4	0.902678	0.906403	0.89961
ENST00000233609.8	0.163066	0.326437	0
ENST00000233612.8	0.009565	0.022411	0
ENST00000233741.8	0.089238	0.367049	0
ENST00000233809.8	0.029493	0.077514	0
ENST00000233892.8	0.095134	0.043141	0.13301
ENST00000234111.8	2.21906	2.42519	2.06118
ENST00000234115.10	0.049671	0.040232	0
ENST00000234160.4	0.025327	0.059341	0
ENST00000234179.6	0.007273	0.018208	0
ENST00000234198.8	0.021671	0.017106	0.022917
ENST00000234296.6	0.060762	0.022669	0.08872
ENST00000234301.2	0.285712	0.124802	0.358687
ENST00000234310.7	2.9494	1.88783	3.63483
ENST00000234313.7	2.13878	1.88899	2.32081
ENST00000234453.9	0.010707	0.002928	0.013939
ENST00000234590.9	0.156434	0.057591	0.227025
ENST00000234626.10	0.007616	0.033143	0
ENST00000234739.7	0.005097	0.011942	0
ENST00000234827.5	0.004814	0.009564	0
ENST00000234831.9	0	0	0.004701
ENST00000234875.8	0.018517	0	0.032294
ENST00000235150.4	0.155401	0.275198	0
ENST00000235307.6	0.009955	0.00381	0.013786
ENST00000235329.9	0.433365	0	0.577137
ENST00000235345.5	0.041552	0.03042	0.049826
ENST00000235790.8	0.061939	0	0.094406
ENST00000235835.7	0.107526	0	0
ENST00000236017.5	0.02512	0.058854	0
ENST00000236147.4	0.639784	0.728599	0.601822
ENST00000236192.11	0.009611	0	0.014171
ENST00000236273.8	0.22059	0	0.249827
ENST00000237019.11	0.251754	0.484476	0
ENST00000237264.8	0.016349	0	0.028754
ENST00000237281.4	0.021282	0.029086	0.015465
ENST00000237283.8	0.08444	0.146615	0
ENST00000237380.11	0.010136	0.008353	0.012486
ENST00000237500.9	0.569193	0.121658	0.844007
ENST00000237536.8	0	1e-06	0
ENST00000237596.6	0.008973	0.00974	0
ENST00000237642.6	1.15937	0.91283	1.34299
ENST00000237654.8	0.210437	0.081619	0.294768
ENST00000237822.7	0.026711	0.077791	0
ENST00000237837.1	0.027271	0.025688	0.02848
ENST00000237853.8	0.029115	0.055812	0.009232
ENST00000237889.8	1.11876	1.3363	0.956456
ENST00000238081.7	5.14729	3.2621	6.27397
ENST00000238112.7	0.255019	0.193335	0.24948
ENST00000238156.7	0.099114	0.134808	0
ENST00000238256.7	0.007395	0.017327	0
ENST00000238341.9	0.067288	0.07646	0.062419
ENST00000238497.9	0.012292	0.026879	0
ENST00000238609.3	0.836655	0.35061	1.20425
ENST00000238647.4	0.038553	0	0.067544
ENST00000238789.9	0.314949	0.387639	0.243412
ENST00000238823.12	0.022857	0.053554	0
ENST00000238831.8	0.034296	0.008539	0.048877
ENST00000238856.8	0.042401	0.126678	0
ENST00000238875.9	0.897577	0.576005	1.10867
ENST00000238936.8	0.028668	0	0.050101
ENST00000239231.6	0.070683	0.099369	0.057259
ENST00000239878.8	0.062224	0.029278	0.053603
ENST00000239882.6	1.05483	0.963628	1.23962
ENST00000239944.6	0.629377	0.490778	0.751405
ENST00000240055.7	0.217737	0.235687	0.264959
ENST00000240100.6	0.00588	0.01636	0
ENST00000240304.5	0.022195	0	0
ENST00000240316.4	0.006076	0.014236	0
ENST00000240487.5	0.084097	0.048903	0.104077
ENST00000240651.13	0.01087	0.01055	0
ENST00000240719.7	0.016636	0	0.028277
ENST00000241312.8	0.001216	0.002848	0
ENST00000241393.3	0.009634	0.022573	0
ENST00000241502.8	0.112954	0.026062	0.16092
ENST00000241651.4	0.084432	0	0.156865
ENST00000242208.4	0.002724	0.006333	0
ENST00000242275.6	0	0.067781	0
ENST00000242323.8	0.028777	0	0.033288
ENST00000242351.9	0.061392	0.073405	0.058138
ENST00000242465.3	24.0477	18.9317	27.9462
ENST00000242505.10	0.155541	0.184574	0.140965
ENST00000242577.10	21.3457	13.2019	27.691
ENST00000242719.3	9.49013	6.91378	11.4187
ENST00000242728.4	0.029285	0.068594	0
ENST00000242737.5	0	0.921216	0
ENST00000242784.4	0.686736	1.18959	0.354092
ENST00000242810.10	0.241358	0	0.254813
ENST00000242872.7	0.080723	0.028971	0.117016
ENST00000243040.10	1.7476	0.686237	2.1805
ENST00000243103.3	0.00506	0.011287	0
ENST00000243213.1	0.035602	0.083413	0
ENST00000243326.9	0	1e-06	1e-06
ENST00000243344.7	0.006134	0.015355	0
ENST00000243346.9	0.599466	0.234088	0.871251
ENST00000243501.9	0.670873	0.683515	0.694315
ENST00000243578.7	0.015958	0	0.027831
ENST00000243583.10	0.007915	0.018546	0
ENST00000243639.8	0.04399	0.016036	0.04003
ENST00000243644.8	0.041384	0	0.036088
ENST00000243662.10	0.332712	0.181891	0.444872
ENST00000243673.6	0.003748	0.008773	0
ENST00000243997.7	0.760966	0.342134	1.06659
ENST00000244020.4	2.68208	2.07859	3.13912
ENST00000244040.3	0.033475	0.038973	0.025549
ENST00000244070.7	0.055107	0	0.096109
ENST00000244230.6	0.031337	0.060796	0
ENST00000244496.5	0.140936	0.297188	0.02458
ENST00000244623.1	0.26287	0.087789	0.507788
ENST00000244741.9	0.809572	0.594031	0.933197
ENST00000244777.6	0.255213	0.201001	0.293047
ENST00000244815.9	0.161523	0	0.238711
ENST00000244869.2	0.009776	0.015247	0
ENST00000245046.6	3.26621	2.81405	3.62289
ENST00000245304.4	0.088637	0.099967	0.081423
ENST00000245448.10	0.019682	0	0
ENST00000245458.10	3.7184	3.54874	3.84902
ENST00000245551.9	0.185456	0	0.292593
ENST00000245787.8	0.066514	0	0.151838
ENST00000245838.12	0.268703	0	0.336502
ENST00000245923.8	0	0.03151	0
ENST00000246006.4	0.004999	0.011541	0
ENST00000246024.6	0.064506	0.093202	0.032077
ENST00000246070.2	0.610094	0.389843	0.773844
ENST00000246151.8	0.374368	0.237062	0
ENST00000246163.2	2.4971	2.34648	2.62852
ENST00000246166.2	0.035341	0.092793	0
ENST00000246174.6	0	0	0.019356
ENST00000246194.7	0.013875	0.029744	0
ENST00000246314.10	0	0	0.096011
ENST00000246551.8	1.22538	1.9171	0.679268
ENST00000246553.3	0.013813	0	0.024159
ENST00000246554.7	3.14411	3.43173	2.98225
ENST00000246792.3	0.078452	0.073524	0.082095
ENST00000246868.6	0.016288	0.042054	0
ENST00000247225.6	0.024255	0	0.042302
ENST00000247815.8	0.048807	0.009736	0.079108
ENST00000247843.6	0.249372	0	0.355842
ENST00000248076.3	0.046786	0.075603	0.032728
ENST00000248211.10	0.021658	0	0.037773
ENST00000248248.7	0.015605	0.006156	0.019948
ENST00000248437.8	0.314292	0.958725	0
ENST00000248444.9	0.05338	0.043916	0.047823
ENST00000248553.6	6.78572	7.25071	6.43759
ENST00000248564.5	23.2677	20.6298	25.2237
ENST00000248566.3	0.338883	0.116151	0.471926
ENST00000248594.10	7.47274	6.07921	8.51885
ENST00000248668.4	0.004884	0.011259	0
ENST00000248975.5	9.05575	8.12968	9.96787
ENST00000249071.10	0.014917	0.077041	0
ENST00000249270.11	0.417	0	0.684426
ENST00000249289.4	1.25047	1.16087	1.31676
ENST00000249299.6	0.032737	0.029243	0.043535
ENST00000249344.6	0.006087	0.029635	0
ENST00000249356.3	0.011858	0.027784	0
ENST00000249364.8	0.209445	0	0
ENST00000249373.7	0.008588	0.020121	0
ENST00000249647.7	2.77217	1.86552	3.45461
ENST00000249786.8	0.527475	0	0
ENST00000249822.8	0.33025	0	0.11025
ENST00000249837.7	0.018832	1e-06	0.032891
ENST00000250092.10	0.601518	0.840593	0.308063
ENST00000250405.9	0.035628	0.052172	0.023302
ENST00000250457.7	0.03335	0.037781	0.014608
ENST00000250495.9	1.5575	1.56599	1.32413
ENST00000250498.8	8.1576	3.79338	11.6601
ENST00000250559.13	0.119281	0.085315	0.154216
ENST00000250572.12	0.125269	0	0.187402
ENST00000250916.5	0.061232	0.117379	0.019417
ENST00000250974.9	0.029842	0.023306	0.034698
ENST00000251038.9	0.005935	6e-06	0.007214
ENST00000251047.5	0.06357	0.074736	0.029309
ENST00000251170.11	0.018973	0.046424	0
ENST00000251334.6	0.005074	0	0.009259
ENST00000251496.6	0.219391	0	0.317811
ENST00000251507.8	0.228422	0.109116	0.317387
ENST00000251527.9	0.010652	0	0.018696
ENST00000251535.10	0.582253	0.56506	0.595035
ENST00000251595.11	1.37333	0	1.95488
ENST00000251775.8	0.049209	0.06426	0
ENST00000251879.10	0.101471	0	0.122711
ENST00000252032.9	0.081416	0.126418	0.041104
ENST00000252444.9	0.009073	0	0.01048
ENST00000252457.9	0	0.714828	0
ENST00000252458.6	0.655326	0	1.14368
ENST00000252483.9	0.006535	0.015311	0
ENST00000252512.13	0.485265	0	0.61063
ENST00000252660.5	0.016622	0.003844	0.026002
ENST00000252744.5	0.072744	0.055516	0.084576
ENST00000252799.3	0.012276	0.029183	0
ENST00000252818.4	0.086837	0	0.151448
ENST00000252934.9	0	0	0.011636
ENST00000253023.7	0.022799	0	0.034711
ENST00000253031.6	0.015477	0.018131	0.013496
ENST00000253039.8	0.178144	0.01968	0.119875
ENST00000253048.9	0.011457	0	0.010101
ENST00000253115.6	0.018326	0.024122	0.013607
ENST00000253251.12	0.033365	0.094405	0
ENST00000253255.6	0.024936	0	0.04349
ENST00000253270.11	1.36488	2.00177	0.974949
ENST00000253329.2	0.187958	0.135501	0.226944
ENST00000253413.9	0.178076	0	0.220754
ENST00000253452.6	2.50967	2.30806	2.65892
ENST00000253458.11	0.11501	0.057881	0.157042
ENST00000253462.7	0	0.014703	0
ENST00000253693.6	0	0	0.011256
ENST00000253788.10	0.663576	0	0.826651
ENST00000253814.5	0.080198	0.068049	0.0783
ENST00000253815.3	8.83958	4.81086	11.7943
ENST00000253861.4	0.075279	0.085728	0.060412
ENST00000253934.9	0.249892	0.157631	0.318488
ENST00000254029.7	0.755626	0	1.11538
ENST00000254090.8	0.152956	0	0.234752
ENST00000254101.3	0.039645	0.062328	0.017068
ENST00000254190.3	0.010568	0.024761	0
ENST00000254286.8	0.179794	0	0.304255
ENST00000254337.10	0.021244	0	0.03705
ENST00000254442.7	0	1e-06	1e-06
ENST00000254528.3	0.003046	0.006362	0
ENST00000254630.11	0.027099	0.007539	0.036079
ENST00000254654.7	0.211413	0.06611	0
ENST00000254691.9	0.038358	0.045619	0.033129
ENST00000254719.9	0.641049	0.20072	0.954863
ENST00000254742.6	0.056119	0	0.16262
ENST00000254803.3	0.023374	0	0.040766
ENST00000254810.8	0.492352	0.484157	0.448652
ENST00000254942.7	0.048553	0.074103	0.01397
ENST00000254950.12	0.007826	0.018332	0
ENST00000255175.5	8.18915	7.75866	8.52998
ENST00000255198.2	0.01605	0.025873	0.008921
ENST00000255304.8	0.012623	0.029575	0
ENST00000255320.6	5.31321	3.93181	6.40496
ENST00000255390.9	0.003665	0	0.002991
ENST00000255559.7	0.005881	0.013779	0
ENST00000255608.8	0.095445	0.029555	0.143659
ENST00000255684.9	0.149233	0.594921	0
ENST00000255688.7	0.154834	0.362771	0
ENST00000255759.10	0	0.009618	0
ENST00000255977.6	0.637812	0.562685	0.712433
ENST00000256015.4	0.015269	0.024068	0.00643
ENST00000256078.8	0.17899	0.072319	0.242767
ENST00000256079.8	0.021433	0	0.037456
ENST00000256103.2	0.00303	0.007574	0
ENST00000256117.9	0	0	0.02215
ENST00000256257.1	0.03464	0.04058	0.030207
ENST00000256343.7	0	0.201819	0
ENST00000256413.7	0.017962	0	0.027087
ENST00000256458.4	0.041506	0.064839	0.024127
ENST00000256544.7	0.082006	0	0.09931
ENST00000256578.7	0.012224	0.013884	0
ENST00000256593.7	0.036357	0.076875	0
ENST00000256637.7	0.116273	0	0.107991
ENST00000256646.6	0.006547	0.01445	0
ENST00000256682.8	0.224174	0.082789	0.331265
ENST00000256686.10	1.62941	1.04683	2.04244
ENST00000256689.9	0.084002	0.215641	0
ENST00000256692.5	0.220614	0.031492	0.374834
ENST00000256720.6	0.003256	0	0.005827
ENST00000256854.9	0.105562	0.015285	0.162853
ENST00000256897.8	0.036368	0.169075	0.057385
ENST00000257013.8	0.165558	0.036609	0.231678
ENST00000257181.9	0.00627	0	0.005378
ENST00000257190.9	0.048757	0.164781	0.034858
ENST00000257261.10	0.015547	0.029734	0
ENST00000257287.4	0.103664	0.276533	0
ENST00000257290.9	0.00625	0.01509	0
ENST00000257336.5	0	0.156149	0
ENST00000257359.6	0.060007	0.037492	0.076747
ENST00000257435.11	1.09298	0.895373	1.21524
ENST00000257468.11	7.57055	5.49116	9.11574
ENST00000257552.6	0.005406	0	0.009428
ENST00000257575.8	0.008405	0.019644	0
ENST00000257604.9	0.007521	0.029326	0
ENST00000257626.11	0.388276	0.278101	0.46767
ENST00000257659.12	0.873521	0.497367	1.12214
ENST00000257663.3	0.352483	0.300311	0.391204
ENST00000257745.8	0.40209	0.346938	0.443344
ENST00000257776.4	0.031764	0.081701	0
ENST00000257787.5	1.793	1.61267	1.922
ENST00000257789.4	0.191984	0.362268	0
ENST00000257818.2	0.413583	0.190675	0.57804
ENST00000258070.4	0.491241	0	0.514361
ENST00000258098.6	0	0	0.00644
ENST00000258148.11	0.289406	0	0.597422
ENST00000258149.9	0.015197	0.024374	0.007972
ENST00000258173.10	0.007641	0	0.013281
ENST00000258180.7	0.022496	0	0.039598
ENST00000258229.13	0.073363	0.00599	0.122178
ENST00000258301.5	0.021728	0	0.025163
ENST00000258302.8	0.002856	0.006691	0
ENST00000258341.4	0.002362	0.004747	0
ENST00000258362.7	0.150548	0.088182	0.196923
ENST00000258383.3	0.050104	0.021782	0.071473
ENST00000258390.11	0	0	0.222032
ENST00000258399.7	0	0	0.017091
ENST00000258418.9	0.292987	0.411605	0.232645
ENST00000258424.2	0.116587	0.218528	0
ENST00000258455.7	0.03248	0.076098	0
ENST00000258457.6	0.037587	0.052614	0.029241
ENST00000258484.10	0.013198	0.030923	0
ENST00000258526.8	0.002299	0.005384	0
ENST00000258534.12	0.02899	0.043742	0
ENST00000258607.9	0	0.045507	0
ENST00000258648.6	0.011736	0.027867	0
ENST00000258672.9	1.9999	1.8105	2.13995
ENST00000258679.11	0.010324	0.040335	0
ENST00000258711.7	0.062432	0.081256	0.037996
ENST00000258729.7	0.216207	0.285019	0.162752
ENST00000258739.8	0.274902	0.105509	0.397072
ENST00000258821.7	0.004569	0	0.007969
ENST00000258873.8	0.02384	0	0.021064
ENST00000258874.3	0.028175	0	0.047592
ENST00000258886.12	0.009122	0.020613	0
ENST00000258947.7	0.007163	0	0.012537
ENST00000258991.7	0.025486	0.080286	0
ENST00000259008.6	0.092773	0.05083	0.126329
ENST00000259021.8	0.008014	0	0.013473
ENST00000259038.6	0.136169	0	0.278514
ENST00000259043.11	0.065608	0.204514	0
ENST00000259053.5	0.090124	0.040237	0.127204
ENST00000259235.7	0.080403	0.099041	0.06263
ENST00000259239.7	0.018616	0	0.032467
ENST00000259253.10	0	0.008545	0
ENST00000259271.7	0.006546	0.015336	0
ENST00000259400.10	0.063181	0	0.109724
ENST00000259407.6	0	0.011145	0
ENST00000259455.3	0.011468	0	0.014662
ENST00000259477.6	0.059174	0	0.120421
ENST00000259569.5	0.003502	0	0.006109
ENST00000259727.4	1.91839	1.40617	2.29905
ENST00000259806.2	0.809204	1.19323	0.535039
ENST00000259941.6	0.004011	0	0.006995
ENST00000259963.3	0.058248	0.024084	0.083661
ENST00000260045.7	0.075436	0.068444	0
ENST00000260056.6	0	0.101545	0
ENST00000260061.9	0.007492	0	0.013081
ENST00000260276.7	0	0.013803	0
ENST00000260323.15	0.004015	0.011119	0
ENST00000260356.5	1.53759	1.13557	1.7803
ENST00000260372.7	0.010466	0.015541	0
ENST00000260379.10	0	0.064223	0
ENST00000260383.11	0	0.130584	0
ENST00000260408.7	0.109231	0.095627	0.121324
ENST00000260453.3	0.023961	0	0.041789
ENST00000260506.12	0.195209	0.21441	0.181844
ENST00000260563.4	0.056085	0.082588	0
ENST00000260569.4	0.014098	0	0.025861
ENST00000260585.11	0.050979	0.02448	0.070456
ENST00000260641.9	0.923742	0.510049	1.01462
ENST00000260648.10	0	0.023368	0
ENST00000260653.4	0.013249	0.03167	0
ENST00000260665.11	0.093881	0.051906	0.110649
ENST00000260731.4	0.12527	0.084962	0.155234
ENST00000260746.5	0.020873	0.029342	0.014561
ENST00000260753.8	0.416096	0.326947	0.482321
ENST00000260762.10	0.482054	0.416941	0.530366
ENST00000260803.8	0.045484	0	0.073731
ENST00000260810.9	0.076299	0.159579	0.027434
ENST00000260818.10	0.043629	0	0.068257
ENST00000260947.8	0.035602	0.019626	0.042319
ENST00000260956.8	0.114223	0	0.19921
ENST00000261017.9	0.150743	0.037914	0.235104
ENST00000261024.6	3.08463	2.53414	3.49949
ENST00000261167.6	0.066895	0.05018	0.079669
ENST00000261180.8	0.003147	0	0.00519
ENST00000261182.12	0.606601	0.52941	0.642285
ENST00000261187.8	0.014246	0	0.023379
ENST00000261191.11	0.114892	0.102733	0
ENST00000261192.11	0.028267	0.017308	0.033541
ENST00000261195.2	0.030794	0	0.053707
ENST00000261211.7	0.13487	0.049998	0.164053
ENST00000261233.8	0.197683	0.167668	0.216706
ENST00000261234.10	0.025375	0	0.04431
ENST00000261247.13	1.34834	0	1.47727
ENST00000261249.6	1.88246	1.97895	1.81631
ENST00000261263.4	0.044126	0.033438	0.053011
ENST00000261292.8	0.004902	0	0.008119
ENST00000261296.6	0.045512	0	0.079376
ENST00000261302.9	0.016569	0.044268	0
ENST00000261313.2	0.044585	0.044741	0.022006
ENST00000261326.5	0.002611	0	0.004536
ENST00000261339.10	0.219163	0	0.305246
ENST00000261353.8	33.3363	26.3641	39.6981
ENST00000261366.9	0.04472	0	0.038997
ENST00000261388.7	0.161848	0	0
ENST00000261396.5	0.061513	0.041876	0.06437
ENST00000261401.7	0.612493	0.659889	0.648934
ENST00000261405.9	0.014463	0.008472	0.018918
ENST00000261427.9	0.047412	0.010365	0.073692
ENST00000261438.9	0.334576	0.175835	0.452629
ENST00000261455.8	0.026044	0	0.045422
ENST00000261461.6	0.042529	0.075857	0.0151
ENST00000261483.4	2.91124	2.20278	3.43867
ENST00000261488.10	0.019954	0.012636	0.02825
ENST00000261489.6	29.549	25.6616	32.4822
ENST00000261491.9	0.011694	0.00559	0.016126
ENST00000261497.8	0.083893	0.077241	0.089298
ENST00000261517.9	0	1e-06	1e-06
ENST00000261530.11	0.012533	0.009038	1e-06
ENST00000261531.11	0.606726	0.488424	0.708551
ENST00000261535.7	0.884433	0.600315	1.094
ENST00000261537.6	0.002231	0.005259	0
ENST00000261558.7	0.024344	0.029885	0.017846
ENST00000261560.9	0.019831	0.022034	0.019279
ENST00000261569.11	0.089675	0	0.210668
ENST00000261593.7	0.057783	0.037899	0
ENST00000261596.8	0.015412	0.022631	0.00448
ENST00000261597.8	0.09661	0.034824	0.142571
ENST00000261606.11	0.16882	0.255478	0
ENST00000261609.11	1e-06	1e-06	1e-06
ENST00000261637.4	0.00177	0	0.003088
ENST00000261667.7	0.867031	0.679955	1.00601
ENST00000261681.8	0.265359	0.049994	0.418595
ENST00000261692.6	2.66457	1.88058	2.84796
ENST00000261700.7	0.007867	0.014178	0
ENST00000261716.7	0.188716	0.223575	0.163484
ENST00000261721.8	0.08124	0.104443	0.081321
ENST00000261733.6	0.005828	0.007921	0.003826
ENST00000261739.8	0.076201	0.027713	0.100445
ENST00000261749.10	0.560567	1.2884	0
ENST00000261772.12	0.013498	0.025703	0
ENST00000261783.3	0.500349	0	0.88887
ENST00000261797.6	0.027601	0	0.049722
ENST00000261798.9	0.088641	0.089107	0.090935
ENST00000261826.10	0.02152	0	0.037375
ENST00000261837.11	0.020801	0.011908	0.025405
ENST00000261842.9	0	0.043849	0
ENST00000261845.6	0.054392	0	0.077007
ENST00000261847.7	0.084091	0.096919	0.075906
ENST00000261854.9	0.011213	0	0.012667
ENST00000261879.9	0.015313	0.017939	0
ENST00000261890.6	2.67341	2.44478	2.84334
ENST00000261921.7	0.073381	0.030307	0.133246
ENST00000261947.4	0.197653	0.320318	0
ENST00000261951.8	0.127482	0.072802	0.169235
ENST00000262030.7	0.140781	0	0.03395
ENST00000262033.10	0.723451	0.532166	0.708625
ENST00000262053.7	0.175973	0.090238	0.240431
ENST00000262056.13	0.036113	0	0.063061
ENST00000262061.6	0.010544	0.024809	0
ENST00000262065.7	15.6503	13.123	17.53
ENST00000262067.4	0.054012	0.10847	0.013457
ENST00000262077.2	0.635934	0.478555	0.748056
ENST00000262094.9	5.76321	4.65038	6.5929
ENST00000262096.12	0.028859	0.047024	0.00982
ENST00000262109.7	0	0.072561	0
ENST00000262120.9	0.337486	0.102985	0.510436
ENST00000262126.8	0.016126	0	0.022363
ENST00000262133.10	0.061492	0.092056	0.037775
ENST00000262144.10	0.024034	0.016165	0.026698
ENST00000262160.10	0.020259	0.014135	0.025075
ENST00000262177.8	0.665574	0.512501	0.785184
ENST00000262187.9	0.168518	0.110628	0.154537
ENST00000262189.10	0.424873	0.313796	0.52404
ENST00000262193.6	0.372016	0.083011	0.587023
ENST00000262210.9	0.078728	0.038157	0.134776
ENST00000262213.6	3.95553	3.14062	4.61996
ENST00000262215.7	0.926926	0.597071	1.174
ENST00000262225.7	0.038006	0	0.066921
ENST00000262227.7	0.027658	0	0.036444
ENST00000262238.8	0.013404	0.014935	0.006621
ENST00000262241.6	0.07629	0.039106	0.107449
ENST00000262259.6	0.085914	0	0.146406
ENST00000262293.8	0.049911	0.143297	0
ENST00000262306.11	0.892767	0.931089	0
ENST00000262346.6	0.016624	0.042784	0
ENST00000262367.9	0.029735	0.039396	0.02237
ENST00000262370.11	0.057273	0.067177	0.045664
ENST00000262407.5	3.5621	3.00406	3.97633
ENST00000262424.9	0.010487	0.016376	0.006096
ENST00000262428.4	0.172408	0.239656	0
ENST00000262430.5	0.003794	0.011474	0
ENST00000262435.13	0.197425	0.175427	0.211513
ENST00000262450.7	0.00828	0.00776	0.008664
ENST00000262455.6	0.297062	0.208223	0.351151
ENST00000262456.6	0	0.038088	0
ENST00000262457.6	0.051932	0	0.067929
ENST00000262460.4	0.096126	0.086862	0.104736
ENST00000262461.6	0.013598	0.020542	0.006754
ENST00000262482.10	0.085213	0	0
ENST00000262487.4	0.012423	0	0.021666
ENST00000262494.12	0.0061	0	0
ENST00000262502.5	0.003333	0.008639	0
ENST00000262518.8	0.007693	0	0.003992
ENST00000262519.13	0.00248	0.00581	0
ENST00000262525.5	0.002629	0	0.004585
ENST00000262585.6	0	0.035567	0.029836
ENST00000262605.8	0.028773	0	0.036196
ENST00000262613.9	0.238066	0.028669	0.329297
ENST00000262640.11	2.82573	3.20612	2.70398
ENST00000262644.8	0.031299	0.010554	0.046538
ENST00000262662.5	0.04213	0.057637	0.028983
ENST00000262719.9	0.030116	0.019101	0.040116
ENST00000262768.11	0.021979	0	0.007666
ENST00000262795.5	0.009021	0	0.015732
ENST00000262811.10	0.096627	0.13733	0.066534
ENST00000262815.12	0.010787	0.022549	0
ENST00000262825.9	0.054944	0	0.061602
ENST00000262854.10	1e-06	1e-06	2e-06
ENST00000262866.8	1.4761	1.26769	1.62463
ENST00000262894.10	0.010729	0.025138	0
ENST00000262919.9	0.005553	0.01301	0
ENST00000262949.7	0.251138	0	0.423962
ENST00000262962.11	0.034005	0	0.059307
ENST00000262971.2	0.010179	0	0.017749
ENST00000262982.2	1.27443	1.03767	1.45025
ENST00000262994.8	0.346681	0	0.381754
ENST00000262995.8	0.005596	0	0.009779
ENST00000263012.10	0.002318	0	0.002545
ENST00000263025.8	0.03238	0	0
ENST00000263026.9	0.008346	0	0.014816
ENST00000263033.9	0.190881	0.184965	0.197137
ENST00000263035.8	0.028589	0.030073	0
ENST00000263036.9	0.124267	0	0.193915
ENST00000263056.5	0.015313	0.031844	0
ENST00000263062.8	0.048515	0.077629	0
ENST00000263063.8	0.015523	0	0.016049
ENST00000263073.10	0.017593	0	0.030683
ENST00000263080.2	0.021146	0.061384	0.011896
ENST00000263092.10	0.003907	0	0
ENST00000263095.10	0.00529	0	0.009156
ENST00000263102.6	0.088146	0.14844	0.007452
ENST00000263126.2	0.041081	0.064168	0.023883
ENST00000263168.3	0.86543	0.503436	1.14257
ENST00000263181.6	0.108678	0.060715	0.143807
ENST00000263187.3	0.0246	0.034582	0.017161
ENST00000263202.14	0.035099	0.09409	0
ENST00000263228.3	0.015745	0	0.02746
ENST00000263233.8	0.019351	0.015113	0.022499
ENST00000263238.6	0.406812	0.29254	0.529015
ENST00000263245.9	0.092076	0	0.142663
ENST00000263253.8	0.192107	0.196943	0.177181
ENST00000263256.6	0.122538	0.077838	0.158535
ENST00000263257.5	0.043551	0.03437	0.051909
ENST00000263269.3	0.01258	0	0.02194
ENST00000263270.10	0.208604	0	0.131649
ENST00000263275.4	0.009505	0.007639	0.005729
ENST00000263280.10	0.072313	0	0.074837
ENST00000263341.6	0.029824	0.069876	0
ENST00000263372.4	0.00958	0.013279	0.005902
ENST00000263377.6	0.101845	0.137678	0.075816
ENST00000263379.3	0.027259	0.038228	0.018982
ENST00000263384.11	0.386077	0.475444	0.331891
ENST00000263398.10	0.047638	0.026691	0.058496
ENST00000263440.4	0.247507	0	0.342356
ENST00000263461.10	0.037037	0.056739	0
ENST00000263464.7	0.00309	0.007237	0
ENST00000263512.5	0.063344	0	0.118706
ENST00000263545.7	1.6168	1.09924	2.04914
ENST00000263559.10	0.078663	0.14206	0.031478
ENST00000263579.4	0.010983	0.025734	0
ENST00000263593.7	0.092968	0.035503	0.126556
ENST00000263610.6	0.041455	0.065349	0.024027
ENST00000263634.7	0.072931	0	0.092468
ENST00000263640.7	0.063863	0.194843	0
ENST00000263642.2	0.013398	0	0.023367
ENST00000263657.6	0.029625	0	0.052083
ENST00000263686.10	0.254806	0.109268	0.340725
ENST00000263694.8	0.21322	0.214172	0.222136
ENST00000263707.5	2.7629	2.91645	2.64771
ENST00000263708.6	0.028715	0.01767	0.036452
ENST00000263733.4	0.055614	0.122956	0.00471
ENST00000263736.4	0.04626	0.025909	0.062076
ENST00000263754.4	0.298361	0.222447	0.297385
ENST00000263773.9	0.127981	0.129563	0.040045
ENST00000263776.8	0.010892	0	0
ENST00000263798.7	0.010352	0	0.011554
ENST00000263812.8	0	0	0.013931
ENST00000263831.11	0	0.045616	0
ENST00000263847.5	0.032073	0.044298	0.032974
ENST00000263856.8	0.617106	0.595766	0.557168
ENST00000263857.10	0.004312	0.010034	0
ENST00000263864.9	1.36812	1.55265	1.23032
ENST00000263881.7	0.060954	0.161559	0
ENST00000263904.4	0.052934	0.011939	0.071515
ENST00000263915.7	0.1473	0.258851	0.063061
ENST00000263918.8	0.022135	0.050987	0
ENST00000263921.7	0.095692	0.224202	0
ENST00000263960.6	0.351849	0	0.597141
ENST00000263967.3	0.009195	0	0.016236
ENST00000263969.9	0.27277	0	0.187024
ENST00000263980.7	0.138587	0	0.266179
ENST00000264010.9	0.178316	0	0.282497
ENST00000264028.4	0.215483	0	0.245734
ENST00000264033.5	0.029002	0.055113	0.010489
ENST00000264039.6	0.004323	0	0.007539
ENST00000264052.9	0.163705	0	0.259738
ENST00000264057.6	0.049641	0	0.062008
ENST00000264065.11	0.00437	1e-05	0.006188
ENST00000264107.11	0.162286	0	0.214224
ENST00000264108.4	2.14395	1.89255	2.34695
ENST00000264110.6	0.240266	0.181026	0
ENST00000264156.2	0.27925	0.301971	0.262245
ENST00000264158.12	0.142855	0.211352	0.095096
ENST00000264159.10	0.016548	0.042537	0
ENST00000264161.8	0.102439	0.080003	0.079661
ENST00000264167.8	0.011202	0	0.01965
ENST00000264169.6	0	0.197364	0
ENST00000264170.8	0.036925	0.012625	0.053722
ENST00000264181.6	0.191478	0	0.273397
ENST00000264183.8	0	0	0.045927
ENST00000264187.6	0.062775	0.076737	0.052362
ENST00000264193.2	0.017088	0	0.029802
ENST00000264202.7	1.18316	2.13804	0.586912
ENST00000264205.10	0.332061	0.378866	0.292593
ENST00000264229.11	0.003502	0.008488	0
ENST00000264230.4	0.060072	0	0.099482
ENST00000264233.5	0.089909	0.073322	0.102565
ENST00000264235.12	0.24156	0.184812	0.283843
ENST00000264244.7	1.86247	1.94171	1.79896
ENST00000264258.7	0.013549	0.025936	0
ENST00000264265.3	0.673954	0.24029	0.996544
ENST00000264266.12	0.817975	0.911915	0.636616
ENST00000264275.9	0.071277	0	0
ENST00000264279.9	0.054065	0.046765	0.060732
ENST00000264312.11	1.39827	0	1.73597
ENST00000264313.10	0.089062	0.04591	0.116995
ENST00000264331.8	0	0	0.172
ENST00000264346.11	0.005825	0.011572	0
ENST00000264380.8	0.034437	0.027189	0.038586
ENST00000264414.8	0.007621	0.017411	0
ENST00000264424.12	0.347414	0.090921	0.578488
ENST00000264431.8	0	0	0.041005
ENST00000264441.9	0.016594	0.038778	0
ENST00000264444.6	0.394796	0.255408	0.474178
ENST00000264447.8	0.04959	0.060343	0.067458
ENST00000264449.14	2.29674	2.00683	2.51478
ENST00000264451.11	0.012916	0.019056	0.00738
ENST00000264452.9	0.048775	0	0.1155
ENST00000264501.8	1e-06	3e-06	2e-06
ENST00000264596.3	1.03781	0.280071	1.53649
ENST00000264645.11	0.005682	0	0
ENST00000264657.9	0.070053	0.080063	0.06182
ENST00000264663.9	0.065864	0.104325	0.011906
ENST00000264709.7	0.005439	0	0.008107
ENST00000264710.4	0.953324	1.01695	0.901891
ENST00000264712.7	0.083899	0.056163	0.104517
ENST00000264716.8	0.002643	0.007073	0
ENST00000264734.2	0.029759	0.046841	0.017211
ENST00000264735.2	0.598946	0.123312	0.749964
ENST00000264741.9	0.02634	0.033231	0.021203
ENST00000264779.6	1.66087	1.23226	2.01022
ENST00000264790.6	0.964204	0	1.48941
ENST00000264805.9	4.3307	3.37419	5.07678
ENST00000264824.4	0.337919	0.383096	0.30418
ENST00000264848.9	0.159453	0.149387	0.172979
ENST00000264852.8	0.193021	0.018896	0.273018
ENST00000264867.6	0	0.005933	0
ENST00000264870.7	16.7856	13.6642	19.0314
ENST00000264883.7	0.017428	0.095208	0
ENST00000264893.10	0.232162	0.195613	0.247075
ENST00000264908.10	0.336179	0	0.492676
ENST00000264926.6	0.02171	0.007861	0.031457
ENST00000264934.5	0.194018	0.543513	0
ENST00000264993.7	0	0.155646	0
ENST00000265000.8	0.011168	0	0.019478
ENST00000265018.3	0.00815	0	0.008969
ENST00000265022.7	0.015212	0.01107	0.020662
ENST00000265028.7	0.0096	0.022492	0
ENST00000265044.6	0.092707	0.099432	0.075911
ENST00000265062.7	0.525059	0.268973	0.71717
ENST00000265068.9	0.007866	0	0.018883
ENST00000265069.12	0.247638	0.093512	0.361598
ENST00000265070.6	0.041412	0	0.051589
ENST00000265071.2	0.008409	0	0.014295
ENST00000265073.8	0.212726	0.037781	0.337821
ENST00000265081.6	0.023518	0.027551	0.020509
ENST00000265085.9	0.158079	0.153088	0.16621
ENST00000265093.4	0.87699	2.25185	0
ENST00000265094.9	0	0.010482	0.0175
ENST00000265112.7	0.010868	0	0.028897
ENST00000265138.3	0.159388	0.071466	0.221165
ENST00000265140.9	0.055897	0.076964	0.039894
ENST00000265149.9	0.059927	0	0.091833
ENST00000265171.9	0.145617	0.248581	0
ENST00000265174.4	0.165021	0.047642	0.187069
ENST00000265175.5	0.05843	0	0.102777
ENST00000265187.4	0.053744	0.010958	0.086952
ENST00000265192.8	23.6937	19.1241	27.1784
ENST00000265245.9	0.004495	0.010532	0
ENST00000265260.7	0.475407	0.707046	0.243466
ENST00000265271.6	0.004046	0.009611	0
ENST00000265277.9	0.048691	0.130732	0
ENST00000265295.8	0.054313	0.127254	0
ENST00000265339.6	0.15781	0.095591	0.187945
ENST00000265343.9	0.020312	0.011401	0.026563
ENST00000265344.8	0.724542	0.743184	0.679745
ENST00000265351.11	0.022189	0.023815	0.022179
ENST00000265382.7	0.071988	0.016998	0.116392
ENST00000265393.10	1.3905	0.922585	1.69028
ENST00000265395.6	0.01014	0	0
ENST00000265428.4	0.205554	0.431828	0
ENST00000265431.7	0.00636	0	0.011092
ENST00000265437.9	0.553837	0.49329	0.456205
ENST00000265447.8	0	0	0.046075
ENST00000265462.8	0.084612	0.226419	0
ENST00000265498.5	0.168821	0.080313	0
ENST00000265529.7	0.007581	0	0
ENST00000265563.12	0.032321	0	0.064925
ENST00000265594.8	0.024594	0	0
ENST00000265619.6	0.106892	0.074283	0.136177
ENST00000265620.11	12.5728	8.81105	15.105
ENST00000265641.9	0.075192	0.122148	0.03047
ENST00000265713.6	0.221075	0.229507	0.215574
ENST00000265717.4	6.89284	6.29161	7.34576
ENST00000265729.6	0.008505	0.019926	0
ENST00000265734.8	0.004602	0.010077	0
ENST00000265742.7	0.034606	0.033085	0.035177
ENST00000265827.7	0.078897	0.064409	0.059647
ENST00000265866.11	1.07252	1.01111	0.999878
ENST00000265870.7	0.030756	0.070396	0
ENST00000265896.9	0.005432	0.012726	0
ENST00000265909.8	0.002701	0.005815	0
ENST00000265970.11	0.237708	0.206717	0.263375
ENST00000265997.4	0.033027	0.046429	0.023041
ENST00000266022.8	0.17193	0.018525	0.314744
ENST00000266025.3	0.014692	0.034422	0
ENST00000266069.4	0.065628	0.008542	0.108101
ENST00000266079.4	0.010564	0.024752	0
ENST00000266087.11	0.060982	0	0
ENST00000266126.9	0.022848	0.031471	0
ENST00000266254.11	0.098551	0.06927	0
ENST00000266483.6	0.162179	0.350483	0.048298
ENST00000266503.9	0.074618	0	0.237538
ENST00000266508.13	0.005661	0.012689	0
ENST00000266517.8	0.00918	0.025605	0
ENST00000266529.7	0.149249	0.069008	0.214708
ENST00000266544.9	0.008823	0	0.011664
ENST00000266589.10	0.107434	0.030683	0.249254
ENST00000266604.6	0.031451	0.028423	0.033194
ENST00000266712.10	0.008851	0.020942	0.004802
ENST00000266732.8	0.052027	0.033494	0.063158
ENST00000266880.11	0.208637	0.203886	0.210504
ENST00000266943.10	0.015427	0.036146	0
ENST00000267068.5	0.002385	0.005022	0
ENST00000267113.4	0.004489	0.010517	0
ENST00000267115.9	0.456092	0	0.830441
ENST00000267116.7	0.007357	0	0.012831
ENST00000267163.5	0.175203	0.14982	0.195145
ENST00000267169.11	0.050148	0.085128	0
ENST00000267197.9	0.00556	0.012994	0
ENST00000267202.6	0.138162	0.068386	0.138924
ENST00000267229.11	0.212904	0	0.355339
ENST00000267294.4	0.017591	0	0.0335
ENST00000267339.6	0.247499	0.351596	0.191477
ENST00000267436.8	0.024886	0	0.024971
ENST00000267460.8	0.050437	0.057113	0.039373
ENST00000267484.9	0.060786	0.087642	0.040774
ENST00000267622.8	0.118371	0.071933	0.151703
ENST00000267807.11	0	0.072207	0
ENST00000267812.3	0.097383	0.105306	0.091453
ENST00000267853.9	0.50546	0.388388	0.606809
ENST00000267859.7	0.212206	0.149111	0.261692
ENST00000267884.10	0.035361	0.083913	0
ENST00000267889.4	0.13101	0.140614	0.130714
ENST00000267918.9	0.647058	0	1.05127
ENST00000267938.8	0.211359	0.147387	0.355225
ENST00000267950.12	1.54807	1.17575	0.995761
ENST00000267996.11	0.193733	0.182086	0.195162
ENST00000268042.6	0.015756	0.009229	0.02061
ENST00000268070.8	0.018145	0.018407	0.017996
ENST00000268099.13	0.028747	0	0
ENST00000268184.10	0.007787	0.018244	0
ENST00000268251.12	0.075869	0.008478	0.124929
ENST00000268379.8	0.023619	0.057132	0
ENST00000268483.7	0.120895	0	0.104274
ENST00000268489.9	0.159455	0.219013	0.108551
ENST00000268595.2	0.139836	0	0.243882
ENST00000268607.9	9.76378	6.81878	11.9673
ENST00000268717.9	0.551877	0	0.15882
ENST00000268756.7	0	0.013991	0
ENST00000268835.6	0.014082	0.052474	0
ENST00000269033.7	0.013057	0	0.023046
ENST00000269122.7	0.156455	0.152711	0.146954
ENST00000269141.7	0.008763	0.017372	0
ENST00000269143.7	0.326633	0.255096	0.379776
ENST00000269197.11	0.003686	0	0.00616
ENST00000269209.6	0.032271	0	0.056283
ENST00000269214.9	0.261478	0.315513	0.208348
ENST00000269383.7	0.041458	0.031661	0.042156
ENST00000269445.10	0.030168	0	0.039522
ENST00000269466.7	0.014439	0.033829	0
ENST00000269499.9	0	0.029859	0
ENST00000269720.6	0	0.155354	0
ENST00000269814.8	0.027224	0.063784	0
ENST00000269834.1	0	0.018929	0
ENST00000269856.4	0.499598	0.631512	0.405721
ENST00000269919.10	0.096683	0.142987	0.081968
ENST00000269973.9	0.02479	0.019507	0.028716
ENST00000270001.11	0.010961	0.023185	0
ENST00000270139.7	0.047106	0.024609	0.063723
ENST00000270142.10	1.10478	1.0752	1.12643
ENST00000270238.3	0.032219	0.022646	0.039334
ENST00000270301.11	0.01038	0.024319	0
ENST00000270460.10	0.0342	0.027181	0.040048
ENST00000270625.6	4.60079	3.63568	5.3177
ENST00000270691.8	0.568738	0.267877	0.79636
ENST00000270776.12	0.556303	0.295698	0.683857
ENST00000270792.9	7.12277	6.61934	7.49081
ENST00000271002.14	3.90136	3.06248	3.52702
ENST00000271139.12	0.006899	0	0.012743
ENST00000271373.8	1.02045	0.997892	0.985987
ENST00000271375.6	0.009584	0.030195	0
ENST00000271411.8	1e-06	0	1e-06
ENST00000271417.7	0.002828	0.00625	0
ENST00000271526.8	0.046028	0.107843	0
ENST00000271583.7	0.087959	0.153067	0.032327
ENST00000271628.8	0.518983	0.199635	0.75653
ENST00000272067.10	1.25941	1.2526	1.3842
ENST00000272091.7	0.012129	0	0.021152
ENST00000272102.9	1.04366	0.737904	1.28457
ENST00000272134.5	0.015027	0.023365	0
ENST00000272163.8	0.06342	0.040165	0.06538
ENST00000272249.7	0.712198	0.680207	0.806702
ENST00000272274.8	0	0.363745	0
ENST00000272298.11	1.34748	3.10759	0
ENST00000272321.11	0.011033	0.026091	0
ENST00000272322.8	0.814133	0.592993	0.978402
ENST00000272369.13	0.115029	0.038386	0.154719
ENST00000272638.13	0.126277	0.224714	0.117906
ENST00000272647.9	0.653684	0.499771	0.768041
ENST00000272732.10	0.066657	0.0782	0
ENST00000272748.8	0.009001	0.0063	0.008566
ENST00000272898.11	0.059021	0.253587	0
ENST00000272930.8	0.502796	0.398083	0.596782
ENST00000273009.10	0.005645	0	0
ENST00000273038.7	0.014606	0.010746	0.011246
ENST00000273047.8	0.36905	0.102162	0.496289
ENST00000273062.6	0.995115	0.858112	1.09777
ENST00000273146.6	0.189958	0.071785	0.277862
ENST00000273258.3	12.1621	10.3164	13.5169
ENST00000273317.4	0.026631	0	0.041411
ENST00000273359.7	0.017384	0.018329	0
ENST00000273398.7	0.074186	0.051867	0.072058
ENST00000273432.8	0.373443	0	0.597637
ENST00000273480.3	0.021105	0	0.026993
ENST00000273550.11	3.69172	3.23303	3.97431
ENST00000273582.9	0.009734	0.016162	0
ENST00000273590.3	0.054328	0	0.055028
ENST00000273854.7	0.007734	0	0.013488
ENST00000273968.4	0.071738	0	0.125115
ENST00000273986.9	0.03556	0.012602	0.055486
ENST00000274026.9	0.023014	0.020221	0.025086
ENST00000274054.2	0.00848	0.019869	0
ENST00000274056.11	0.00895	0.020971	0
ENST00000274071.6	0.393329	0.188751	0.47446
ENST00000274093.7	0.00557	0.004349	0.006448
ENST00000274140.9	0.023368	0.051292	0
ENST00000274192.6	0.041312	0.006011	0.056401
ENST00000274203.13	0.014261	0.006612	0.006495
ENST00000274217.3	0.030039	0	0.052389
ENST00000274311.2	0.051611	0.008637	0.083584
ENST00000274341.8	0.02001	0.026807	0.014957
ENST00000274361.3	0.015907	0	0.027743
ENST00000274364.10	0.501966	0.40882	0.579801
ENST00000274376.10	0	0	0.023237
ENST00000274456.6	0.895209	0.973475	0.770696
ENST00000274457.4	0.016512	0.025791	0.009599
ENST00000274562.13	0.084345	0	0.134321
ENST00000274629.8	0.013892	0	0.022888
ENST00000274680.8	0.292396	0.15985	0.390964
ENST00000274695.8	0.167585	0	0.307507
ENST00000274712.7	1.05179	0.714911	1.31534
ENST00000274787.2	0.099692	0.175181	0.043467
ENST00000274813.3	0.055655	0.080244	0.037333
ENST00000274891.10	0.114865	0	0.153787
ENST00000275034.4	0.265664	0.246657	0.279592
ENST00000275036.11	0.079431	0.139577	0.034633
ENST00000275072.4	0.010229	0.023924	0
ENST00000275080.11	0.85518	0.592212	1.05916
ENST00000275159.10	0.127445	0.094127	0
ENST00000275233.11	0.190088	0.090127	0.268524
ENST00000275418.11	0.208516	0	0.365389
ENST00000275517.7	0.031129	0	0.054291
ENST00000275546.4	0	0	2.3588
ENST00000275575.11	0	0	0.138623
ENST00000275590.9	0.485645	0.039236	0.817785
ENST00000275605.7	0.016989	0.056771	0
ENST00000275766.1	0.350993	0.411307	0.30611
ENST00000275767.3	4.14761	3.41589	4.68202
ENST00000275988.5	0.279659	0	0.533765
ENST00000276077.1	0	0	0.076722
ENST00000276123.7	0.011196	0	0.019567
ENST00000276175.7	0.022222	0.025377	0
ENST00000276202.8	0.155426	0.040899	0.224492
ENST00000276297.8	0.010735	0	0.01685
ENST00000276390.6	0.044767	0.065554	0.029278
ENST00000276440.11	0.113042	0.021663	0.152725
ENST00000276654.9	0.239998	0.114459	0
ENST00000276737.10	0.007423	0.008627	0.006534
ENST00000276893.9	0.129107	0.212612	0.074232
ENST00000276898.3	0	0.075687	0
ENST00000277165.10	0	0.020314	0
ENST00000277480.6	14.083	14.0951	13.8582
ENST00000277549.9	0.001117	0	0.001948
ENST00000277551.6	0.001117	0	0.001948
ENST00000277570.9	0.121246	0.02246	0.21669
ENST00000277575.5	0.067497	0.008323	0.111523
ENST00000277632.7	0.42515	0.331379	0.496313
ENST00000277900.12	0.276719	0.149093	0.374093
ENST00000278100.10	0.069368	0	0.069036
ENST00000278175.9	1.4244	1.48772	1.3768
ENST00000278193.6	0.065148	0.060508	0.042636
ENST00000278353.9	0.008304	0	0
ENST00000278386.10	0.64688	0	1.04114
ENST00000278412.6	0.022833	0	0.029866
ENST00000278460.11	0.099826	0	0
ENST00000278505.4	0.694062	0.552735	0.799037
ENST00000278544.9	0.05725	0	0.098081
ENST00000278590.7	0.034958	0.043957	0.027769
ENST00000278612.8	0.091647	0.012401	0.148102
ENST00000278616.8	0	1e-06	1e-06
ENST00000278671.9	2.99245	1.57957	4.15157
ENST00000278903.10	0.040428	0	0.070335
ENST00000278927.9	2.72963	2.80319	2.67399
ENST00000278949.8	0.067313	0.027186	0.095799
ENST00000279022.6	1.11532	0.80246	1.34596
ENST00000279247.10	0.091577	0.107494	0.065739
ENST00000279259.7	3.00017	1.41248	4.15785
ENST00000279550.11	0.720883	0.911172	0
ENST00000279873.11	0.012252	0.004771	0.017803
ENST00000280057.6	0.030696	0	0.053543
ENST00000280098.8	0.00712	0	0.012995
ENST00000280200.8	0.60713	0.429329	0.739883
ENST00000280285.9	0	0.212173	0
ENST00000280377.9	0.355018	0.352801	0.361564
ENST00000280571.9	0.128176	0.058352	0.170862
ENST00000280591.10	0.0202	0.058172	0
ENST00000280749.5	0.245227	0	0.463408
ENST00000280772.6	1e-06	1e-06	1e-06
ENST00000280800.4	0.003338	0	0.005822
ENST00000280876.6	0.041734	0.097782	0
ENST00000280987.8	0.070457	0.135942	0.047682
ENST00000281092.8	0.008886	0.00391	0.012256
ENST00000281129.7	0.059784	0.029429	0.051509
ENST00000281142.9	0.434811	1.38787	0
ENST00000281156.4	0.006915	0.016202	0
ENST00000281416.11	0.061256	0.09972	0
ENST00000281419.7	0.205954	0.720852	0
ENST00000281441.7	0.016329	0.040019	0
ENST00000281453.9	0	0.073451	0
ENST00000281471.10	0.243864	0.087942	0.295671
ENST00000281513.9	0.631453	0.573967	0.674792
ENST00000281523.7	0.198725	0.194126	0.201038
ENST00000281581.5	0	1.00528	0
ENST00000281589.4	0.005227	0.012254	0
ENST00000281741.8	0.415768	0.311548	0.4961
ENST00000281772.13	0.018517	0	0.020719
ENST00000281828.6	0.124737	0.033858	0.191644
ENST00000281923.3	0	0	0.166205
ENST00000281924.6	0.22226	0.060086	0.342907
ENST00000281928.7	0.006191	0	0.010051
ENST00000281950.7	0.004734	0	0.00758
ENST00000282003.6	0.19111	0.127932	0.238075
ENST00000282007.7	0.027183	0.048526	0.011419
ENST00000282058.10	0	0.599335	0
ENST00000282077.7	0.217793	0.171937	0.251428
ENST00000282111.3	0.005429	0	0.009478
ENST00000282120.6	0.216724	0	0
ENST00000282260.10	0.20238	0	0.820215
ENST00000282296.9	0.003514	0	0.006132
ENST00000282344.10	0.993744	0.700901	1.18713
ENST00000282388.3	0.021715	0.050878	0
ENST00000282516.12	0.026007	0.039784	0.01192
ENST00000282570.3	0.119893	0.033043	0.160171
ENST00000282574.8	0	0	0.148384
ENST00000282670.6	0.014289	0.029253	0
ENST00000282673.5	5.64663	4.99042	6.12563
ENST00000282728.9	0.084412	0.153825	0
ENST00000282753.5	0.007247	0.016979	0
ENST00000282869.10	0.039338	0	0.07881
ENST00000282878.5	0.048326	0.055088	0.041863
ENST00000282892.3	0.175517	0	0.30611
ENST00000282943.9	0.022761	0.053329	0
ENST00000283006.6	0.245523	0.217496	0
ENST00000283131.3	2.29013	2.23633	2.32964
ENST00000283147.6	0.439972	0.379782	0.484632
ENST00000283148.11	1.31022	1.10677	1.46622
ENST00000283179.14	0.165887	0.108801	0
ENST00000283195.10	0.090457	0.036765	0.125836
ENST00000283206.8	0.262668	0.128915	0.364729
ENST00000283285.9	0.016563	0.040578	0
ENST00000283357.9	0.382253	0	0
ENST00000283628.9	0	0	0.090962
ENST00000283629.7	0.024596	0.076201	0
ENST00000283632.4	0.327639	0.24994	0.389178
ENST00000283646.4	0.017511	0.041026	0
ENST00000283871.9	1.10182	1.18673	1.04043
ENST00000283905.7	0.082322	0.05645	0.105183
ENST00000283943.9	0.019482	0	0.032846
ENST00000284037.9	0.034624	0.081156	0
ENST00000284049.7	0.126356	0.133512	0.120988
ENST00000284165.10	0.141277	0.094473	0.163674
ENST00000284268.7	0.048106	0.004882	0.075402
ENST00000284273.5	0.143539	0.134827	0.152398
ENST00000284292.10	30.8559	25.6597	34.6668
ENST00000284320.5	0.045188	0.017656	0.064976
ENST00000284384.6	0.091558	0.075473	0.09514
ENST00000284414.4	0.010235	0.023667	0
ENST00000284425.6	0.003021	0.007079	0
ENST00000284563.7	0.100162	0	0.174688
ENST00000284727.8	212.317	215.862	209.63
ENST00000284811.12	0	0	0.839257
ENST00000284856.3	4.03346	3.27956	4.60496
ENST00000284881.8	0.038852	0.088675	0.006606
ENST00000284971.7	0.400646	0.967657	0
ENST00000285082.8	0	0	0.109076
ENST00000285124.12	0.012652	0.014372	0
ENST00000285208.8	0.1481	0.112039	0.185613
ENST00000285243.6	0.048809	0.055175	0.040116
ENST00000285274.9	0	0	0.024122
ENST00000285379.9	25.3846	21.219	28.8574
ENST00000285381.2	0.009238	0.021644	0
ENST00000285397.9	0.052457	0	0.074055
ENST00000285419.7	2.27716	1.95963	2.54539
ENST00000285667.3	0.012074	0	0.021058
ENST00000285679.10	0.654184	0.353381	0.876324
ENST00000285697.8	0.237932	0.263785	0.19687
ENST00000285737.8	0.004646	0.021442	0
ENST00000285873.7	0.005934	0.013902	0
ENST00000285930.8	0.242349	0.243349	0.121803
ENST00000285968.10	0.058729	0.030335	0.062347
ENST00000286067.4	0.120313	0	0.199738
ENST00000286070.9	0.012873	0.063748	0
ENST00000286091.8	0.060892	0.116848	0.034765
ENST00000286181.7	0.047004	0.031129	0.058965
ENST00000286298.4	0.015826	0.0139	0.017251
ENST00000286424.12	0	0.104557	0
ENST00000286448.11	0.905599	0.2058	1.28294
ENST00000286452.5	0.013659	0.032001	0
ENST00000286548.8	0.781305	0.529785	0.968284
ENST00000286621.6	0	0.032731	0
ENST00000286713.6	2.77886	2.46349	3.00457
ENST00000286732.4	1.05432	1.09059	1.02986
ENST00000286760.5	0.015949	0.018009	0.013497
ENST00000286788.8	0.333381	0	0
ENST00000286800.7	0.075494	0.072867	0.09262
ENST00000286953.7	6.39882	7.04829	5.90327
ENST00000287022.9	0.028352	0	0.048663
ENST00000287038.7	1.18478	1.44225	0
ENST00000287156.8	0.639032	0.092402	0.838866
ENST00000287169.7	0.011542	0	0.01797
ENST00000287275.5	0.069545	0.2402	0
ENST00000287322.4	0.007523	0.022709	0
ENST00000287394.9	0.117578	0	0.206682
ENST00000287468.5	0.045292	0	0.11765
ENST00000287482.5	0.012407	0.029068	0
ENST00000287594.7	0.060032	0.018716	0.072565
ENST00000287600.8	0.050276	0.195359	0
ENST00000287667.11	0.051879	0.486518	0
ENST00000287706.7	1.16198	0	1.1889
ENST00000287899.13	0.002719	0	0
ENST00000287912.7	7.42809	5.86197	8.51455
ENST00000287957.4	0.005083	0	0.007379
ENST00000288266.7	0.020514	0.027867	0.013774
ENST00000288344.14	0	0.4489	0
ENST00000288398.10	0.017939	0	0
ENST00000288422.3	0.334053	0.179071	0.420416
ENST00000288439.9	0.014566	0.034595	0
ENST00000288447.8	0.016643	0.038994	0
ENST00000288986.6	0.201484	0	0.320262
ENST00000289004.8	0.022915	0.053689	0
ENST00000289290.7	0.01946	0.045594	0
ENST00000289292.11	0	0	0.024857
ENST00000289316.2	9.25593	8.39306	10.187
ENST00000289361.10	0.024064	0	0.040861
ENST00000289373.4	0.751454	0.568805	0.889154
ENST00000289382.7	0.130103	0.127843	0.091316
ENST00000289431.9	0.003997	0.009353	0
ENST00000289577.9	0.060383	0	0.087473
ENST00000289672.6	0.001757	0.004117	0
ENST00000289703.8	0	0.50786	0
ENST00000289893.8	3e-06	9e-06	6e-06
ENST00000289902.1	18.7879	16.9305	20.1644
ENST00000290158.8	0.010729	0.061258	0
ENST00000290178.4	0.138212	0.072473	0.175309
ENST00000290299.6	0.370368	0	0.430627
ENST00000290341.7	0.001932	0.004526	0
ENST00000290649.9	0.269818	0.290886	0.251526
ENST00000290650.8	0.222736	0.246523	0.20179
ENST00000290795.7	1.23354	0.887994	1.4855
ENST00000290855.10	0	0	0.014205
ENST00000290858.10	0.025916	0.02879	0
ENST00000290894.12	805.855	783.344	822.35
ENST00000291041.5	0.004614	0.010809	0
ENST00000291232.4	0.019208	0.02535	0.023805
ENST00000291294.6	0.154537	0	0.195117
ENST00000291295.13	2.52084	2.17973	2.77306
ENST00000291386.3	0.41071	0.325495	0.296424
ENST00000291439.7	0.001575	0	0.002834
ENST00000291442.3	0.020117	0.047133	0
ENST00000291478.9	0.039522	0.047402	0
ENST00000291536.7	0	0	0.059536
ENST00000291547.9	0.003409	0	0.006053
ENST00000291572.12	0.01732	0.04058	0
ENST00000291750.6	0.421506	0.146364	0.652518
ENST00000291900.6	0.06704	0.039034	0.087787
ENST00000292114.7	0.005106	0	0.008905
ENST00000292176.2	0	0.026391	0
ENST00000292211.4	0.210275	0.093841	0.274855
ENST00000292314.6	0.080596	0	0.140564
ENST00000292357.7	0	0	0.089346
ENST00000292430.10	0.012056	0	0.021026
ENST00000292431.4	0.014426	0.016899	0.012579
ENST00000292450.8	0.00806	0	0.014056
ENST00000292535.11	1e-06	1e-06	1e-06
ENST00000292591.11	0	0.128722	0
ENST00000292614.9	0.021807	0.052821	0
ENST00000292782.8	0.029392	0.006664	0.045532
ENST00000292807.9	0.366045	0.260729	0.237531
ENST00000292823.6	0.089661	0.134438	0.047685
ENST00000292928.6	0.030999	0.034004	0
ENST00000293255.2	2.73644	2.06623	3.23444
ENST00000293288.12	0.013759	0	0.02435
ENST00000293328.7	0.05619	0.026115	0.086126
ENST00000293371.10	0.129268	0	0.22545
ENST00000293406.7	0.160467	0	0.269309
ENST00000293648.8	0.007724	0	0.012247
ENST00000293860.5	0.023371	0.054762	0
ENST00000294008.3	0.091175	0.128265	0.068736
ENST00000294053.8	0.009786	0	0.017432
ENST00000294066.6	0.003	0	0.004881
ENST00000294241.10	0.514444	0.250405	0.607263
ENST00000294338.6	2.41661	2.68602	2.18037
ENST00000294339.3	0.518483	0	0.48154
ENST00000294383.6	0.025275	0.030189	0.019041
ENST00000294507.3	1.24369	0.841011	1.55395
ENST00000294623.8	0.073146	0.201381	0.016964
ENST00000294661.8	0.014492	0.033296	0
ENST00000294678.6	0.211295	0.081818	0.22468
ENST00000294737.11	0.078859	0.062979	0.092624
ENST00000294742.6	7.06332	6.44223	7.54132
ENST00000294964.5	0.01288	0.030177	0
ENST00000294981.8	0.056465	0.0871	0.038902
ENST00000294997.10	0.145352	0	0.257325
ENST00000295006.5	0.162327	0.15793	0.149705
ENST00000295025.12	0.002351	0.005846	0
ENST00000295050.11	0.037048	0	0.064613
ENST00000295087.12	0.014066	0.03373	0
ENST00000295095.10	0.162153	0.293391	0.025214
ENST00000295119.8	0	0.558308	0
ENST00000295246.6	0.132814	0.049155	0.206971
ENST00000295256.9	0.019821	0.046439	0
ENST00000295268.3	0.03925	0.068972	0.017114
ENST00000295269.4	0.004873	0.016659	0
ENST00000295321.8	0.010875	0	0.018966
ENST00000295448.7	0.190274	0	0.233776
ENST00000295470.9	0.018609	0	0.032084
ENST00000295488.7	0.385809	0	0.532037
ENST00000295500.8	0.154735	0.132552	0.14988
ENST00000295548.3	0	0.070138	0
ENST00000295605.6	0.011098	0	0.014521
ENST00000295612.7	0.02908	0.05416	0
ENST00000295633.7	0.424948	0.435442	0.444438
ENST00000295685.14	0.457649	0	0.811755
ENST00000295701.9	0.4041	0	0.762458
ENST00000295766.9	0.058315	0.166012	0
ENST00000295770.3	0.157132	0.082957	0.185717
ENST00000295777.9	0.104302	0.192629	0
ENST00000295797.4	0.010684	0.012709	0
ENST00000295822.6	0.015029	0.019931	0.010715
ENST00000295851.9	0.002215	1e-05	0.001629
ENST00000295868.6	0	0.012737	0
ENST00000295872.8	0.019706	0	0.034336
ENST00000295888.8	0.027017	0.036259	0.017582
ENST00000295899.9	0.200305	0	0
ENST00000295901.8	0.417591	0.384714	0.074488
ENST00000295920.7	2.08337	1.67189	2.427
ENST00000295951.7	0.010517	0	0.018199
ENST00000295952.7	0.307569	0.046282	0.47763
ENST00000295958.9	0.008892	0	0.017396
ENST00000296027.4	15.9257	13.578	17.6681
ENST00000296028.3	948.6	803.377	1056.39
ENST00000296029.3	499.69	443.999	541.157
ENST00000296088.11	0.156197	0.047083	0.235943
ENST00000296121.5	0.03682	0.045564	0.021865
ENST00000296122.10	0.289995	0.139466	0.395086
ENST00000296126.6	0.046154	0	0.085523
ENST00000296135.10	0.0262	0.031968	0.009589
ENST00000296161.8	0.006762	0.006569	0.006047
ENST00000296181.8	0.044853	0.066585	0.016496
ENST00000296214.9	0.084006	0	0.025177
ENST00000296220.5	0.045918	0.062757	0.033368
ENST00000296233.3	0.006133	0.014592	0
ENST00000296252.8	0.129009	0.130547	0.128414
ENST00000296255.7	0.141548	0.146968	0.167604
ENST00000296289.10	0.050239	0.117708	0
ENST00000296328.8	0.008598	0.014632	0.007175
ENST00000296350.9	0.008097	0	0.014121
ENST00000296370.3	0.012741	0.029851	0
ENST00000296388.9	0.007124	0.014598	0
ENST00000296414.11	9.13515	6.02865	11.3921
ENST00000296417.5	1.29085	0.957443	1.54601
ENST00000296425.9	0.048745	0.036662	0.057804
ENST00000296446.12	0.039056	0	0.057859
ENST00000296490.7	0.12867	0.009617	0.180898
ENST00000296499.5	0.187931	0.201287	0.177928
ENST00000296503.9	0.061499	0	0.10889
ENST00000296504.3	0.01476	0.034582	0
ENST00000296518.11	0.24466	0.159816	0.311953
ENST00000296519.6	0.113969	0.08488	0
ENST00000296521.11	0.164411	0	0.353562
ENST00000296533.2	0.022545	0	0.046613
ENST00000296550.11	0.006132	0	0.010831
ENST00000296555.10	0.023465	0.051035	0
ENST00000296585.9	0.067801	0.045535	0.083022
ENST00000296603.4	0.027337	0.041175	0.010822
ENST00000296642.4	0	0	0.318648
ENST00000296657.6	0.012172	0.024444	0.003033
ENST00000296679.8	0.179289	0.13969	0.201146
ENST00000296684.9	0.481764	0	0.637886
ENST00000296755.11	0.01124	0.006215	0.013934
ENST00000296785.7	0.014315	0	0
ENST00000296786.7	0.006981	0.016168	0
ENST00000296824.3	0.022521	0.024337	0.020877
ENST00000296861.2	0.071456	0.041855	0.093468
ENST00000296933.10	0.013926	0	0
ENST00000296953.6	0.105345	0	0.175371
ENST00000297029.9	0.045572	0.033014	0.052332
ENST00000297109.10	0.020559	0.012042	0.026893
ENST00000297145.8	0.017047	0.05665	0
ENST00000297151.8	0.063409	0.035503	0.066993
ENST00000297183.10	0	0	0.016617
ENST00000297273.8	0.146519	0.123965	0.16326
ENST00000297338.6	0.204361	0.231004	0.181262
ENST00000297369.10	8.79846	8.22396	9.26188
ENST00000297431.8	0.82399	0.781549	0.782263
ENST00000297438.6	0.09525	0.116047	0.079738
ENST00000297508.7	0.015452	0.024136	0.008983
ENST00000297591.9	0.046189	0.043159	0
ENST00000297598.4	0.018767	0.017588	0
ENST00000297615.9	0.133758	0	0.201105
ENST00000297632.7	0.029729	0.013166	0.04081
ENST00000297689.3	0.007746	0.018149	0
ENST00000297785.7	0.022992	0	0.040099
ENST00000297792.9	0	0	0.06658
ENST00000297814.6	0.017256	0	0.030412
ENST00000297933.10	0.073053	0.080488	0.054764
ENST00000298068.9	0.03932	0	0.063761
ENST00000298097.7	0.05421	0.029312	0.072635
ENST00000298125.6	0.029545	0.032125	0.027536
ENST00000298130.4	1.25769	1.22207	1.28373
ENST00000298139.5	0.089057	0.115121	0.069626
ENST00000298159.10	0.01336	0	0.019893
ENST00000298173.7	0.499483	0.21692	0.732317
ENST00000298198.4	0.023071	0.036613	0.013112
ENST00000298248.11	0.275492	0	0
ENST00000298260.8	0	0.266253	0
ENST00000298274.12	0	0	0.004671
ENST00000298281.8	0.02229	0.036713	0.011751
ENST00000298289.6	1.09372	1.03721	1.09187
ENST00000298292.12	0.005428	0.012718	0
ENST00000298299.3	0.302858	0.355067	0.264319
ENST00000298316.6	0.025788	0.009727	0.03746
ENST00000298468.9	0.433859	0.398461	0.501423
ENST00000298492.5	0.085998	0.075559	0.093741
ENST00000298510.3	0.020392	0.047777	0
ENST00000298527.10	10.2612	10.3016	10.3751
ENST00000298556.7	0.17638	0	0.308534
ENST00000298585.2	1.00225	0.571877	1.29086
ENST00000298649.8	0.260949	0.125306	0.37444
ENST00000298715.8	0	0	0.023975
ENST00000298746.4	0.070698	0.066257	0.07398
ENST00000298786.4	0.136554	0	0.186126
ENST00000298858.8	0.103921	0.243482	0
ENST00000298875.8	0.098139	0.095216	0.098687
ENST00000298894.4	0.019855	0	0.034547
ENST00000298896.7	0.165101	0	0.209314
ENST00000298912.8	0.27033	0.222061	0.290506
ENST00000299022.9	0.009267	0.022531	0
ENST00000299157.4	0.010216	0.02488	0
ENST00000299163.6	0.002494	0	0.004324
ENST00000299167.12	0.043635	0.058657	0.027714
ENST00000299178.3	0.570824	0.487835	0.632979
ENST00000299192.7	0.018563	0	0.032613
ENST00000299204.4	0.016438	0	0.029719
ENST00000299240.10	0.334447	0.22683	0.414445
ENST00000299259.10	0.577325	0.325224	0.701123
ENST00000299314.11	0.046306	0.032865	0.056688
ENST00000299335.7	0.011279	0	0.02101
ENST00000299338.10	0.089383	0	0.153419
ENST00000299366.11	0.004057	0	0.007076
ENST00000299381.4	0.037914	0	0
ENST00000299413.6	0.015411	0	0.026843
ENST00000299424.8	0.050906	0.119547	0
ENST00000299440.5	0.004874	0	0.008501
ENST00000299518.6	0	0.033789	0
ENST00000299540.6	0.05141	0.12584	0
ENST00000299550.10	0.003275	0.007674	0
ENST00000299563.4	0.134861	0.0383	0.206695
ENST00000299572.9	0.07066	0.130777	0
ENST00000299601.9	0.144849	0	0.205364
ENST00000299608.6	0.025801	0	0.051037
ENST00000299613.10	0.074791	0.028081	0
ENST00000299633.6	0.068557	0.056677	0.081521
ENST00000299638.7	0.052904	0.103421	0
ENST00000299705.9	0.088108	0.025798	0.134456
ENST00000299732.6	0.035655	0	0.062184
ENST00000299767.9	0.111708	0	0.042842
ENST00000299957.10	0	0.131718	0
ENST00000299977.8	0.004022	0.009637	0
ENST00000299980.8	0.024411	0.042136	0.006813
ENST00000300056.7	0.005875	0	0.010246
ENST00000300069.4	1.98846	1.01113	2.66896
ENST00000300086.4	0.334184	0.28042	0.37229
ENST00000300128.8	0.01271	0.029778	0
ENST00000300146.9	0.204834	0.166125	0.233581
ENST00000300231.5	0.038923	0.047422	0.032584
ENST00000300249.9	3.20427	2.87639	3.48462
ENST00000300278.8	0	0.030059	0
ENST00000300291.9	0.381049	0.334208	0.404811
ENST00000300403.10	0.027553	0	0.048054
ENST00000300574.2	0.041355	0	0.057701
ENST00000300584.7	0.01584	0.006192	0.023001
ENST00000300605.10	0.106781	0.040186	0.066363
ENST00000300648.6	0.003845	0.00901	0
ENST00000300688.7	0.349561	0.376552	0.322488
ENST00000300737.8	0.097695	0.061943	0.142927
ENST00000300738.9	0.078197	0.09556	0
ENST00000300784.7	0.793457	0.982635	0.652378
ENST00000300851.10	0.881523	0.869926	0.662654
ENST00000300870.14	0.029132	0.013847	0.025343
ENST00000300873.4	5.19505	7.98151	3.11917
ENST00000300896.8	0.071955	0.190095	0
ENST00000300935.7	2.07535	1.44076	2.53379
ENST00000300952.6	0.008426	0.019723	0
ENST00000301030.9	0.01854	0	0.028248
ENST00000301067.11	0.000821	0.001924	0
ENST00000301093.6	0.07183	0	0.137452
ENST00000301242.8	0.175385	0.424631	0
ENST00000301246.9	12.048	11.3406	12.8097
ENST00000301281.10	0.041209	0.03899	0.035003
ENST00000301336.6	0.028116	0	0.049035
ENST00000301452.4	0.08612	0.131783	0
ENST00000301459.4	0.01237	0.028981	0
ENST00000301587.8	1.00749	0.526809	1.38272
ENST00000301599.6	0.075299	0.176424	0
ENST00000301608.8	0	0	0.037794
ENST00000301659.8	0.059676	0	0.052038
ENST00000301717.8	0.089723	0.052554	0.117361
ENST00000301776.9	0	0.017383	0
ENST00000301785.5	0.03456	0	0.048114
ENST00000301788.11	3.85828	3.12241	4.41125
ENST00000301838.4	0.087891	0.020592	0.137958
ENST00000301843.12	0.073311	0	0.149432
ENST00000302217.9	0.012885	0.017756	0.009001
ENST00000302243.11	0.013993	0.016415	0.009677
ENST00000302271.10	0	0.122338	0
ENST00000302278.7	7.1095	6.3857	7.65733
ENST00000302303.5	0.13119	0	0.271468
ENST00000302313.9	0.030262	0	0.037759
ENST00000302316.12	0.126065	0.223964	0.038767
ENST00000302326.4	0.010579	0.024786	0
ENST00000302327.3	0.151021	0	0.263388
ENST00000302342.3	0.005684	0.013317	0
ENST00000302350.4	0.237335	0.066685	0.339631
ENST00000302373.8	0.364001	0.179533	0.439442
ENST00000302418.4	0.364372	0.350376	0.377117
ENST00000302450.10	0.00873	0.009202	0
ENST00000302495.4	0	0.018479	0
ENST00000302516.9	0.00387	0.004122	0.003145
ENST00000302528.11	0.03047	0	0
ENST00000302533.6	0.107371	0	0.18225
ENST00000302550.15	0.028915	0	0.043185
ENST00000302609.7	0.014436	0	0.054064
ENST00000302632.3	1.00479	0.500289	1.37418
ENST00000302640.12	0.059518	0	0
ENST00000302692.6	0.0075	0.010249	0
ENST00000302764.8	0.004123	0.009773	0
ENST00000302909.3	0.005219	0	0.009059
ENST00000302995.2	0.034602	0.048552	0.024156
ENST00000303004.4	0.477972	0.470332	0.47776
ENST00000303145.11	0.338103	0	0.44021
ENST00000303319.9	0.022638	0.02652	0.019741
ENST00000303324.4	0.254841	0.373829	0.077683
ENST00000303383.7	0.101537	0.069754	0.137691
ENST00000303391.10	0.006786	0.003693	0.006601
ENST00000303407.11	0.031347	0.056115	0
ENST00000303459.10	0.032282	0	0.048427
ENST00000303531.11	0.178603	0.072941	0.246579
ENST00000303538.12	0.687091	0.520382	0.788416
ENST00000303575.8	0.034963	0.023187	0
ENST00000303577.6	1.17526	1.10579	1.22662
ENST00000303596.2	0.247004	0.094249	0.399647
ENST00000303617.5	0.021801	0.05108	0
ENST00000303660.8	0	0	0.332495
ENST00000303731.8	11.3641	9.13025	11.9311
ENST00000303795.8	1.3293	1.22168	1.41393
ENST00000303843.7	0.006675	0.010441	0
ENST00000303910.4	10.3545	9.4124	11.0524
ENST00000303915.10	0.005312	0.01776	0
ENST00000303924.4	0.039127	0.028627	0.047337
ENST00000304056.8	0.132834	0.151574	0.105666
ENST00000304129.8	0.021983	0.040932	0
ENST00000304141.4	83.6354	70.1729	93.6294
ENST00000304191.3	0.016191	0.037934	0
ENST00000304218.5	0.285566	0.411736	0.191555
ENST00000304222.2	0.186704	0.065616	0.276778
ENST00000304231.12	0.187412	0	0.187501
ENST00000304271.10	0.010105	0.023676	0
ENST00000304414.11	0.936033	0.921686	0.906466
ENST00000304434.10	0.401725	0.389444	0.417394
ENST00000304514.11	0.092441	0	0
ENST00000304523.9	0.006322	0.014813	0
ENST00000304538.10	0.002752	0.006447	0
ENST00000304567.9	0.120208	0.091525	0.134687
ENST00000304621.10	0.113167	0.060905	0.136002
ENST00000304661.5	0.010054	0.023557	0
ENST00000304734.9	0.017639	0.208403	0
ENST00000304760.2	0	0	0.031289
ENST00000304786.11	3.49623	2.66718	3.46731
ENST00000304842.5	0.225602	0.24792	0.206608
ENST00000304858.6	0.132624	0.021691	0.164561
ENST00000304886.6	0.00788	0.018463	0
ENST00000304905.9	0.027062	0.063405	0
ENST00000304932.5	0.111369	0.118685	0.108838
ENST00000304987.3	0.00835	0.019698	0
ENST00000304992.10	0.028606	0	0.028342
ENST00000305097.5	0.315292	0.194399	0.40518
ENST00000305105.2	0.026632	0	0.046447
ENST00000305123.5	0.018196	0.015425	0.020249
ENST00000305135.9	0.432585	0.26677	0.495133
ENST00000305188.12	0.033322	0	0.059083
ENST00000305218.8	0	0.023041	0
ENST00000305366.7	0.08228	0.14994	0
ENST00000305368.8	0.020424	0	0.03599
ENST00000305386.3	0.011983	0.014038	0.01045
ENST00000305392.3	0.346448	0	0.570225
ENST00000305544.8	0.011347	0	0.01979
ENST00000305626.5	0.024713	0	0.042927
ENST00000305737.6	0.061915	0.041826	0.087405
ENST00000305766.10	0.221083	0	0.402425
ENST00000305786.6	0.855774	0.603537	1.04004
ENST00000305958.8	0.126864	0	0
ENST00000305963.2	0.253336	0.281688	0.230859
ENST00000305978.6	0.036485	0.085484	0
ENST00000305997.7	0.0056	0.006242	0.004637
ENST00000306024.3	0.033713	0.029708	0.036685
ENST00000306031.5	0	0.543634	0
ENST00000306049.9	0.012916	0.030262	0
ENST00000306051.2	0.027824	0	0.053367
ENST00000306065.8	0.081202	0.011232	0.125934
ENST00000306085.10	0	1e-06	0
ENST00000306103.2	0.140717	0.058181	0.202108
ENST00000306167.11	0.119631	0.228101	0.04769
ENST00000306185.7	0.023296	0	0.040629
ENST00000306193.7	0.057802	0.025586	0.088923
ENST00000306336.5	0.052021	0.042424	0.038668
ENST00000306346.5	0.017317	0	0.030202
ENST00000306368.8	0.058985	0.138198	0
ENST00000306378.10	0.25984	0.161269	0.256311
ENST00000306389.7	1.80791	1.49817	1.75339
ENST00000306390.6	0.059022	0	0.102518
ENST00000306434.7	0.011416	0.026748	0
ENST00000306465.8	0.433698	0.253096	0.574057
ENST00000306503.5	0.060452	0.078687	0.046859
ENST00000306562.7	0.115727	0.107847	0.12099
ENST00000306721.7	0.01154	0.027039	0
ENST00000306726.6	0.020775	0	0.036232
ENST00000306851.9	0.137408	0.06881	0.188328
ENST00000306888.6	0.004535	0	0.007878
ENST00000306917.4	0.020208	0.010521	0.027411
ENST00000306954.4	0.018916	0.04432	0
ENST00000306984.7	0.446679	0.380729	0.496744
ENST00000306999.6	0.010426	0.024428	0
ENST00000307089.7	0.003646	0	0.010431
ENST00000307116.6	0.073785	0.02766	0.108096
ENST00000307126.9	0.113468	0	0
ENST00000307149.9	0.011035	0.02576	0
ENST00000307194.5	0.013571	0.025527	0
ENST00000307241.5	0	0.088351	0
ENST00000307257.10	0.033539	0	0.057416
ENST00000307300.8	0.113207	0.035066	0.155496
ENST00000307305.12	0.046642	0.023292	0
ENST00000307355.11	0.075373	0	0.133897
ENST00000307395.4	13.5369	12.4089	14.3722
ENST00000307403.6	0	0.151369	0.008859
ENST00000307441.13	0.026446	0.043858	0
ENST00000307533.10	0.343731	0.498662	0.205767
ENST00000307584.5	0.006229	0.014429	0
ENST00000307602.8	0.035815	0.041457	0.031154
ENST00000307630.4	0.456913	0.33792	0.54491
ENST00000307637.4	0.015469	0.036244	0
ENST00000307641.9	0.060575	0.173726	0
ENST00000307659.5	0.05178	0	0.081776
ENST00000307671.12	0	0.050751	0
ENST00000307677.4	2.17145	1.61895	2.6175
ENST00000307720.3	0.214204	0.124795	0.280995
ENST00000307767.12	0.125324	0.305614	0
ENST00000307771.7	0.157431	0	0.265976
ENST00000307808.10	0.041885	0.005907	0.067845
ENST00000307823.7	0.00814	0.009536	0.007098
ENST00000307826.4	0.029147	0.013658	0.040667
ENST00000307845.7	0.502753	0.122053	0.484958
ENST00000307886.7	0.325261	0.307918	0
ENST00000307921.7	0.008655	0	0.015095
ENST00000307961.10	0.024789	0	0.03936
ENST00000307968.11	0.016353	0	0
ENST00000308022.6	0.035707	0	0.044962
ENST00000308099.7	0	0.621893	0
ENST00000308162.9	3.03258	2.46709	3.46358
ENST00000308275.7	0.014456	0	0.028138
ENST00000308330.2	0.366613	0.228531	0.469279
ENST00000308347.10	0.111374	0	0.32771
ENST00000308377.8	0.003523	0.015289	0
ENST00000308488.10	0	0.011701	0
ENST00000308580.11	0.424681	0.477504	0.38411
ENST00000308724.9	0.024359	0	0.042483
ENST00000308731.7	1.75486	1.65179	1.69647
ENST00000308742.8	0.018213	0.021763	0.015463
ENST00000308769.12	0.123813	0.138274	0.106751
ENST00000308775.6	0	0.033965	0
ENST00000308862.10	0.08189	0.320807	0
ENST00000308924.8	0	0.038951	0
ENST00000308961.4	1.31154	0.146328	2.17847
ENST00000309007.9	0.010982	0.026646	0
ENST00000309027.4	0.54744	0.443972	0.56951
ENST00000309032.7	0.268126	0.30692	0.213678
ENST00000309033.4	0.023408	0	0.030873
ENST00000309041.11	0.015306	0.007015	0.016722
ENST00000309049.8	0.033724	0.108894	0
ENST00000309083.6	0	0	0.035245
ENST00000309100.7	0.058534	0	0.102087
ENST00000309117.10	0.064678	0.068423	0.061032
ENST00000309134.9	0.993023	0.206138	1.36874
ENST00000309170.7	0.025645	0.060086	0
ENST00000309190.9	0.040145	0	0
ENST00000309237.8	0.241903	0.625133	0
ENST00000309246.9	0.992961	1.66038	0
ENST00000309268.10	0.149027	0.355942	0
ENST00000309311.6	0.092302	0.016817	0.128704
ENST00000309352.3	0.017464	0.04243	0
ENST00000309395.6	1.52175	1.20952	1.74507
ENST00000309446.10	0.044566	0.058358	0.033909
ENST00000309534.10	1.81267	1.45592	2.06785
ENST00000309558.7	0.003243	0.007502	0
ENST00000309579.7	1.73807	1.9286	1.04235
ENST00000309594.4	0.060936	0.067999	0.046849
ENST00000309683.10	0.17513	0.05194	0.273266
ENST00000309733.5	0.076865	0.073621	0.066526
ENST00000309765.4	0.003002	0	0.005236
ENST00000309791.8	0.005193	0	0.009056
ENST00000309822.6	0.00868	0.02034	0
ENST00000309836.9	0.026037	0.073233	0
ENST00000309851.9	0.128814	0	0.168075
ENST00000309881.11	0	0	0.144003
ENST00000309890.11	0.132343	0.108633	0
ENST00000309922.6	0.115662	0.062537	0.15517
ENST00000309934.4	0.019067	0.043331	0
ENST00000309955.7	0.091921	0.09306	0.095654
ENST00000309983.4	0.01324	0.023683	0
ENST00000309993.2	0.012968	0.035858	0
ENST00000310046.8	0.022358	0.051263	0
ENST00000310092.11	0.059871	0	0.069308
ENST00000310128.8	0.030706	0	0.036074
ENST00000310137.4	0.028449	0	0.039693
ENST00000310190.8	0	0.5313	0
ENST00000310260.7	0.060566	0	0.066865
ENST00000310301.8	0.007144	0	0.012738
ENST00000310343.13	0.073796	0.046056	0.088272
ENST00000310421.4	0.041549	0.037715	0.044831
ENST00000310441.11	0.012611	0.012663	0
ENST00000310442.4	0.004358	0.008611	0
ENST00000310447.9	0.263701	0	0.220182
ENST00000310450.8	0.875831	0.670053	1.02872
ENST00000310452.6	0	0	0.0217
ENST00000310454.10	0.308644	0.176341	0.413134
ENST00000310512.3	0.034942	0.08631	0
ENST00000310528.8	0.004828	0.005191	0.004502
ENST00000310546.2	0.011063	0.025921	0
ENST00000310599.3	0.05697	0	0.124217
ENST00000310613.7	0.121014	0.064211	0.160101
ENST00000310614.11	0.063407	0	0.110586
ENST00000310653.10	0.138602	0.284731	0
ENST00000310795.8	0.838052	1.22361	0.703194
ENST00000310823.7	0.086579	0.081471	0.110196
ENST00000310837.8	1.58625	2.40517	0
ENST00000310898.5	0.008295	0.02327	0
ENST00000310926.8	0	0.00693	0
ENST00000310955.10	0.019351	0.045338	0
ENST00000310958.10	0.054044	0.012269	0.069179
ENST00000310974.8	0	0	0.123585
ENST00000311001.9	0.223295	0.357732	0
ENST00000311048.11	0.032182	1e-06	0.05356
ENST00000311066.9	0.088194	0.053083	0
ENST00000311069.5	0.03774	0.109012	0
ENST00000311085.8	0.012733	0.025492	0
ENST00000311127.8	0.008725	0	0.00913
ENST00000311128.9	0.01028	0.024375	0
ENST00000311141.6	0.343647	0.497922	0.272526
ENST00000311151.9	0.008004	0.018838	0
ENST00000311160.13	0.10073	0.103253	0.098819
ENST00000311180.8	0.017653	0.02623	0
ENST00000311212.8	0.02644	0.035549	0.013517
ENST00000311317.8	0	0.071854	0
ENST00000311350.7	0.295217	0.178324	0.385958
ENST00000311351.8	1.0526	1.82581	0
ENST00000311364.8	0.014602	0.034212	0
ENST00000311403.4	0.056349	0.062955	0
ENST00000311412.9	0.023615	0	0.039085
ENST00000311417.6	0.01842	0.017343	0.009564
ENST00000311459.11	0.029673	0.022299	0.035264
ENST00000311481.10	0.043777	0.029313	0.049034
ENST00000311507.8	0.040134	0.054926	0
ENST00000311637.9	0.505206	0.569173	0.457425
ENST00000311672.9	2.64896	3.42077	1.9124
ENST00000311762.2	0.298753	0.215374	0.36072
ENST00000311765.3	0.01095	0	0.019274
ENST00000311772.9	0.027518	0.064473	0
ENST00000311841.7	0	0.015858	0
ENST00000311893.13	0.392464	0.541573	0.236496
ENST00000311925.6	0.194089	0	0.339068
ENST00000311936.7	0.070899	0.053243	0.089438
ENST00000311943.11	1.53465	0.956272	0
ENST00000312106.5	0.098383	0.018328	0.128689
ENST00000312156.8	0.86893	1.05751	0.676228
ENST00000312184.5	0.46644	0.622666	0.356841
ENST00000312216.12	0.428199	0.280344	0.49469
ENST00000312233.4	0.005723	0	0.00998
ENST00000312263.10	0.323104	0.322594	0.325851
ENST00000312283.12	0.137327	0	0
ENST00000312579.3	0.021305	0.049918	0
ENST00000312635.10	0.040847	0.078625	0.015113
ENST00000312655.8	0.01441	0.008058	0.01872
ENST00000312756.4	0.039664	0.094369	0
ENST00000312849.4	1.37204	0.801318	1.78327
ENST00000312858.9	0.072053	0	0.12611
ENST00000312918.2	0.063395	0.127122	0
ENST00000312938.4	0.110372	0.166301	0.072285
ENST00000312942.1	0	0	0.04818
ENST00000312943.10	0.117706	0	0.141724
ENST00000312960.3	1.70268	1.04056	2.02064
ENST00000312990.10	0.011022	0.030736	0
ENST00000313071.6	0.013109	0.015357	0.011431
ENST00000313093.6	0.024607	0	0.025358
ENST00000313115.10	0	0.081293	0
ENST00000313116.11	0.014926	0	0.026031
ENST00000313143.7	0.03074	0.028585	0.032315
ENST00000313156.3	0.053754	0	0.152022
ENST00000313182.6	0.013474	0	0.011749
ENST00000313285.12	0.129844	0.150141	0
ENST00000313349.3	0.118271	0.092499	0.145922
ENST00000313350.10	0	0.178081	0
ENST00000313368.7	0.221096	0.161881	0.265102
ENST00000313401.3	0.010824	0.016853	0
ENST00000313525.3	0.007113	0.016665	0
ENST00000313546.7	0.635238	0.170076	0.996802
ENST00000313566.10	0	0.379286	0
ENST00000313581.4	0.432781	0.268521	0.569256
ENST00000313601.10	0	0.383096	0
ENST00000313624.11	0.050509	0	0.075803
ENST00000313640.11	0	0.01488	0
ENST00000313663.11	0	0	0.006355
ENST00000314028.10	0.017297	0	0.022625
ENST00000314073.9	0.404219	0.315687	0
ENST00000314088.6	14.6944	13.2788	15.731
ENST00000314100.10	0.15352	0.137498	0.175657
ENST00000314124.11	0.27072	0.149924	0.317216
ENST00000314133.3	1.53261	1.6393	1.45269
ENST00000314163.11	0.048026	0.185134	0
ENST00000314167.8	0.007719	0	0.012588
ENST00000314191.6	0	1e-06	1e-06
ENST00000314218.7	0.044582	0	0.060475
ENST00000314332.5	4.48632	3.58768	5.24102
ENST00000314355.6	0.327243	0.383359	0.285364
ENST00000314523.7	8.45551	5.54197	10.62
ENST00000314557.10	0	0	0.345427
ENST00000314574.4	0	0	0.007548
ENST00000314595.5	0.063567	0.120399	0
ENST00000314607.10	0.702603	0.580554	0.803201
ENST00000314742.12	0	0.022946	0
ENST00000314754.12	0.06338	0.142464	0
ENST00000314759.5	0.178545	0	0
ENST00000314852.2	0.206086	0.084123	0.293339
ENST00000314888.9	0.911188	0.807301	0.991987
ENST00000314940.6	0.065923	0.051485	0.076649
ENST00000315033.4	0.0092	0.021556	0
ENST00000315141.5	0	0.076462	0
ENST00000315183.11	0	0.093734	0
ENST00000315273.4	0.801757	0	1.21352
ENST00000315274.6	0.008205	0	0.01431
ENST00000315289.6	0.031144	0	0.058996
ENST00000315367.3	0.079697	0.037762	0.111376
ENST00000315368.7	0.083112	0	0.118874
ENST00000315377.4	0	0.268443	0
ENST00000315392.8	0.002892	0.006778	0
ENST00000315571.5	0.00727	0.01659	0
ENST00000315576.7	0.009466	0.016635	0
ENST00000315684.13	62.106	66.9583	58.4729
ENST00000315713.5	0.181644	0.337656	0
ENST00000315717.9	3.2451	5.02591	0.986224
ENST00000315741.5	0.317539	0	0.553805
ENST00000315758.9	0.054312	0.115911	0
ENST00000315870.9	0.046688	0	0.07348
ENST00000315872.10	0.016582	0.044093	0
ENST00000315927.8	0.091939	0.071803	0.106897
ENST00000315930.10	0	2e-06	1e-06
ENST00000315948.10	0.487294	0	0.677835
ENST00000315985.7	0.042365	0.063918	0
ENST00000315987.6	0.02608	0	0.041348
ENST00000316005.11	2.00969	1.70907	2.21535
ENST00000316027.10	2.1306	1.11704	2.93655
ENST00000316045.9	0.010986	0.015444	0
ENST00000316052.5	0.167054	0.217445	0
[truncated: 22,046 more rows]

## Sheet: Ery circ RFP
ID	BSJreads	V1	V2	V3	V6	V7	V8	V10	V11	V12	V14	V15	V16	V17	V18	anchor_size	detected_in_RNA_seq
chr11:120276826-120278532	1	chr11	120276826	120278532	+	120276826	120276826	2	24.86	0.162	circRNA	ARHGEF12	uc021qrm.1	2.3	chr11:120207984-120276826|chr11:120278532-120291461	8nt	yes
chr17:20107645-20109225	1	chr17	20107645	20109225	+	20107645	20107645	1	1580	0	circRNA	SPECC1	NM_001243439	4	chr17:20013875-20107645|chr17:20109225-20130725	8nt	yes
chr11:120276826-120278532	1	chr11	120276826	120278532	+	120276826	120276826	2	24.86	0.162	circRNA	ARHGEF12	uc021qrm.1	2.3	chr11:120207984-120276826|chr11:120278532-120291461	9nt	yes
chr17:20107645-20109225	1	chr17	20107645	20109225	+	20107645	20107645	1	1580	0	circRNA	SPECC1	NM_001243439	4	chr17:20013875-20107645|chr17:20109225-20130725	9nt	yes
chr11:120276826-120278532	1	chr11	120276826	120278532	+	120276826	120276826	2	24.86	0.162	circRNA	ARHGEF12	uc021qrm.1	2.3	chr11:120207984-120276826|chr11:120278532-120291461	10nt	yes
chr17:20107645-20109225	1	chr17	20107645	20109225	+	20107645	20107645	1	1580	0	circRNA	SPECC1	NM_001243439	4	chr17:20013875-20107645|chr17:20109225-20130725	10nt	yes
chr17:20107645-20109225	1	chr17	20107645	20109225	+	20107645	20107645	1	1580	0	circRNA	SPECC1	NM_001243439	4	chr17:20013875-20107645|chr17:20109225-20130725	11nt	yes

## Sheet: Mk circ RFP
ID	BSJreads	V1	V2	V3	V6	V7	V8	V10	V11	V12	V14	V15	V16	V17	V18	anchor_size	detected_in_RNA_seq
chr1:14095612-14099683	2	chr1	14095612	14099683	+	14095612	14095612	2	56.111	0.396	circRNA	PRDM2	ENST00000491134	4.5	chr1:14075982-14095612|chr1:14099683-14113009	8nt	yes
chr2:201796061-201798697	4	chr2	201796061	201798697	-	201796061	201796061	2	110.99	0.2537	circRNA	ORC2	ENST00000234296	11.1	chr2:201791623-201796061|chr2:201798697-201800421	8nt	no
chr3:183493702-183508768	1	chr3	183493702	183508768	+	183493702	183493702	4	209,159,177,184	0,1627,10210,14882	circRNA	YEATS2	NM_001351371	18,19,20,21	chr3:183491582-183493702|chr3:183508768-183510903	8nt	yes
chrUn_gl000220:118780-118790	1	chrUn_gl000220	118780	118790	+	118780	118780	1	10	0	ciRNA	RNA5-8S5	uc022brd.2	1	chrUn_gl000220:118780-155996	8nt	no
chrUn_gl000220:118780-118794	1	chrUn_gl000220	118780	118794	+	118780	118780	1	14	0	ciRNA	RNA5-8S5	uc022brd.2	1	chrUn_gl000220:118780-155996	8nt	no
chrUn_gl000220:118780-118801	2	chrUn_gl000220	118780	118801	+	118780	118780	1	NA	0	ciRNA	RNA5-8S5	uc022brd.2	1	chrUn_gl000220:118780-155996	8nt	no
chrUn_gl000220:118780-118804	13	chrUn_gl000220	118780	118804	+	118780	118780	1	24	0	ciRNA	RNA5-8S5	uc022brd.2	1	chrUn_gl000220:118780-155996	8nt	no
chr1:14095612-14099683	2	chr1	14095612	14099683	+	14095612	14095612	2	56.111	0.396	circRNA	PRDM2	ENST00000491134	4.5	chr1:14075982-14095612|chr1:14099683-14113009	9nt	yes
chr2:201796061-201798697	4	chr2	201796061	201798697	-	201796061	201796061	2	110.99	0.2537	circRNA	ORC2	ENST00000234296	11.1	chr2:201791623-201796061|chr2:201798697-201800421	9nt	no
chr3:183493702-183508768	1	chr3	183493702	183508768	+	183493702	183493702	4	209,159,177,184	0,1627,10210,14882	circRNA	YEATS2	NM_001351371	18,19,20,21	chr3:183491582-183493702|chr3:183508768-183510903	9nt	yes
chrUn_gl000220:118780-118790	1	chrUn_gl000220	118780	118790	+	118780	118780	1	10	0	ciRNA	RNA5-8S5	uc022brd.2	1	chrUn_gl000220:118780-155996	9nt	no
chrUn_gl000220:118780-118794	1	chrUn_gl000220	118780	118794	+	118780	118780	1	14	0	ciRNA	RNA5-8S5	uc022brd.2	1	chrUn_gl000220:118780-155996	9nt	no
chrUn_gl000220:118780-118801	2	chrUn_gl000220	118780	118801	+	118780	118780	1	NA	0	ciRNA	RNA5-8S5	uc022brd.2	1	chrUn_gl000220:118780-155996	9nt	no
chrUn_gl000220:118780-118804	13	chrUn_gl000220	118780	118804	+	118780	118780	1	24	0	ciRNA	RNA5-8S5	uc022brd.2	1	chrUn_gl000220:118780-155996	9nt	no
chr1:14095612-14099683	2	chr1	14095612	14099683	+	14095612	14095612	2	56.111	0.396	circRNA	PRDM2	ENST00000491134	4.5	chr1:14075982-14095612|chr1:14099683-14113009	10nt	yes
chr2:201796061-201798697	4	chr2	201796061	201798697	-	201796061	201796061	2	110.99	0.2537	circRNA	ORC2	ENST00000234296	11.1	chr2:201791623-201796061|chr2:201798697-201800421	10nt	no
chr3:183493702-183508768	1	chr3	183493702	183508768	+	183493702	183493702	4	209,159,177,184	0,1627,10210,14882	circRNA	YEATS2	NM_001351371	18,19,20,21	chr3:183491582-183493702|chr3:183508768-183510903	10nt	yes
chrUn_gl000220:118780-118789	3	chrUn_gl000220	118780	118789	+	118780	118780	1	NA	0	ciRNA	RNA5-8S5	uc022brd.2	1	chrUn_gl000220:118780-155996	10nt	no
chrUn_gl000220:118780-118820	1	chrUn_gl000220	118780	118820	+	118780	118780	1	40	0	ciRNA	RNA5-8S5	uc022brd.2	1	chrUn_gl000220:118780-155996	10nt	no
chr1:14095612-14099683	2	chr1	14095612	14099683	+	14095612	14095612	2	56.111	0.396	circRNA	PRDM2	ENST00000491134	4.5	chr1:14075982-14095612|chr1:14099683-14113009	11nt	yes
chr2:201796061-201798697	4	chr2	201796061	201798697	-	201796061	201796061	2	110.99	0.2537	circRNA	ORC2	ENST00000234296	11.1	chr2:201791623-201796061|chr2:201798697-201800421	11nt	no
chr3:183493702-183508768	1	chr3	183493702	183508768	+	183493702	183493702	4	209,159,177,184	0,1627,10210,14882	circRNA	YEATS2	NM_001351371	18,19,20,21	chr3:183491582-183493702|chr3:183508768-183510903	11nt	yes
chrUn_gl000220:118780-118789	3	chrUn_gl000220	118780	118789	+	118780	118780	1	NA	0	ciRNA	RNA5-8S5	uc022brd.2	1	chrUn_gl000220:118780-155996	11nt	no
chrUn_gl000220:118780-118820	1	chrUn_gl000220	118780	118820	+	118780	118780	1	40	0	ciRNA	RNA5-8S5	uc022brd.2	1	chrUn_gl000220:118780-155996	11nt	no
chr1:14095612-14099683	2	chr1	14095612	14099683	+	14095612	14095612	2	56.111	0.396	circRNA	PRDM2	ENST00000491134	4.5	chr1:14075982-14095612|chr1:14099683-14113009	12nt	yes
chrUn_gl000220:118780-118789	3	chrUn_gl000220	118780	118789	+	118780	118780	1	NA	NA	ciRNA	RNA5-8S5	uc022brd.2	NA	chrUn_gl000220:118780-155996	12nt	no
chrUn_gl000220:118780-118790	1	chrUn_gl000220	118780	118790	+	118780	118780	1	10	0	ciRNA	RNA5-8S5	uc022brd.2	1	chrUn_gl000220:118780-155996	13nt	no
chrUn_gl000220:118780-118790	1	chrUn_gl000220	118780	118790	+	118780	118780	1	10	0	ciRNA	RNA5-8S5	uc022brd.2	1	chrUn_gl000220:118780-155996	14nt	no

## Sheet: Plt circ RFP
ID	BSJreads	V1	V2	V3	V6	V7	V8	V10	V11	V12	V14	V15	V16	V17	V18	anchor_size
chr11:120276826-120278532	6	chr11	120276826	120278532	+	120276826	120276826	2	24.86	0.162	circRNA	ARHGEF12	uc021qrm.1	2.3	chr11:120207984-120276826|chr11:120278532-120291461	8nt
chr11:33307958-33309057	12	chr11	33307958	33309057	+	33307958	33307958	1	1099	0	circRNA	HIPK3	ENST00000525975	2	chr11:33278298-33307958|chr11:33309057-33350055	8nt
chr11:43852525-43861614	4	chr11	43852525	43861614	+	43852525	43852525	3	35,82,66	0,7341,9023	circRNA	HSD17B12	NM_016142	7,8,9	chr11:43837941-43852525|chr11:43861614-43876264	8nt
chr11:73418464-73429763	8	chr11	73418464	73429763	-	73418464	73418464	3	94,112,106	0,8831,11193	circRNA	RAB6A	NM_198896	6,5,4	chr11:73390765-73418464|chr11:73429763-73431890	8nt
chr11:86778735-86802437	4	chr11	86778735	86802437	+	86778735	86778735	3	128,93,34	0,3829,23668	circRNA	TMEM135	uc001pcg.2	2,3,4	chr11:86749228-86778735|chr11:86802437-86889498	8nt
chr12:109046047-109048186	10	chr12	109046047	109048186	-	109046047	109046047	2	146.105	0.2034	circRNA	CORO1C	NM_001105237	8.7	chr12:109042796-109046047|chr12:109048186-109051079	8nt
chr12:118693252-118704564	12	chr12	118693252	118704564	-	118693252	118693252	2	208.105	0.11207	circRNA	TAOK3	uc001twx.3	3.2	chr12:118682770-118693252|chr12:118704564-118797310	8nt
chr16:15091609-15092262	2	chr16	15091609	15092262	+	15091609	15091609	2	74.66	0.587	circRNA	PDXDC1	ENST00000563679	2.3	chr16:15068661-15091609|chr16:15092262-15095632	8nt
chr17:79536041-79539114	14	chr17	79536041	79539114	-	79536041	79536041	2	96.72	0.3001	circRNA	NPLOC4	NR_130139	3.2	chr17:79534559-79536041|chr17:79539114-79544383	8nt
chr1:185094075-185106928	2	chr1	185094075	185106928	-	185094075	185094075	3	167,79,191	0,3725,12662	circRNA	TRMT1L	NM_030934	12,11,10	chr1:185093051-185094075|chr1:185106928-185108498	8nt
chr1:65830317-65831879	8	chr1	65830317	65831879	+	65830317	65830317	3	151,50,149	0,1250,1413	circRNA	DNAJC6	ENST00000494710	2,3,4	chr1:65720332-65830317|chr1:65831879-65845084	8nt
chr1:9991948-9994918	6	chr1	9991948	9994918	-	9991948	9991948	3	82,96,99	0,912,2871	circRNA	LZIC	NM_001316975	7,6,5	chr1:9982416-9991948|chr1:9994918-9995549	8nt
chr22:21288066-21288532	12	chr22	21288066	21288532	+	21288066	21288066	1	466	0	circRNA	CRKL	ENST00000354336	2	chr22:21272533-21288066|chr22:21288532-21303998	8nt
chr22:50810448-50810579	4	chr22	50810448	50810579	+	50810448	50810448	1	131	0	circRNA	PPP6R2	ENST00000359139	2	chr22:50781979-50810448|chr22:50810579-50832321	8nt
chr2:109288780-109289485	2	chr2	109288780	109289485	+	109288780	109288780	2	121.15	0.555	circRNA	LIMS1	NM_001193483	4.5	chr2:109287303-109288780|chr2:109289485-109292333	8nt
chr2:136505836-136513261	2	chr2	136505836	136513261	+	136505836	136505836	4	103,29,119,175	0,5272,5892,7250	circRNA	UBXN4	ENST00000272638	2,3,4,5	chr2:136499581-136505836|chr2:136513261-136519387	8nt
chr2:238896604-238903451	8	chr2	238896604	238903451	+	238896604	238896604	2	30.66	0.6781	circRNA	UBE2F	ENST00000440223	4.5	chr2:238894934-238896604|chr2:238903451-238933982	8nt
chr2:54125006-54128696	4	chr2	54125006	54128696	-	54125006	54125006	4	130,54,137,210	0,431,2011,3480	circRNA	PSME4	ENST00000421748	11,10,9,8	chr2:54124022-54125006|chr2:54128696-54131161	8nt
chr2:9048750-9098771	6	chr2	9048750	9098771	-	9048750	9048750	3	96,78,146	0,34565,49875	circRNA	MBOAT2	NM_001321267	5,4,3	chr2:9028203-9048750|chr2:9098771-9114487	8nt
chr4:129960195-130003528	2	chr4	129960195	130003528	-	129960195	129960195	4	56,73,59,68	0,4354,4952,43265	circRNA	SCLT1	ENST00000281142	5,4,3,2	chr4:129925031-129960195|chr4:130003528-130014224	8nt
chr4:42618049-42629126	4	chr4	42618049	42629126	-	42618049	42618049	4	46,99,100,115	0,8503,9581,10962	circRNA	ATP8A1	ENST00000381668	5,4,3,2	chr4:42602535-42618049|chr4:42629126-42658841	8nt
chr5:122881110-122893258	10	chr5	122881110	122893258	+	122881110	122881110	3	425,41,70	0,7690,12078	circRNA	CSNK1G3	ENST00000345990	2,3,4	chr5:122848264-122881110|chr5:122893258-122909086	8nt
chr5:176468126-176471534	2	chr5	176468126	176471534	+	176468126	176468126	2	104.142	0.3266	circRNA	ZNF346	NM_001308214	2.3	chr5:176449914-176468126|chr5:176471534-176477751	8nt
chr7:33060883-33063720	14	chr7	33060883	33063720	-	33060883	33060883	3	86,47,70	0,781,2767	circRNA	NT5C3A	NM_001166118	7,6,5	chr7:33059336-33060883|chr7:33063720-33066428	8nt
chr7:77026298-77035422	14	chr7	77026298	77035422	-	77026298	77026298	4	54,70,57,77	0,364,7577,9047	circRNA	GSAP	ENST00000257626	5,4,3,2	chr7:77016765-77026298|chr7:77035422-77045529	8nt
chr8:131172109-131199531	2	chr8	131172109	131199531	-	131172109	131172109	6	101,87,76,86,130,50	0,7672,9128,19400,20887,27372	circRNA	ASAP1	NM_001247996	13,12,11,10,9,8	chr8:131165051-131172109|chr8:131199531-131200354	8nt
chr8:37971709-37976881	4	chr8	37971709	37976881	+	37971709	37971709	4	96,96,76,94	0,713,2458,5078	circRNA	ASH2L	ENST00000343823	6,7,8,9	chr8:37968351-37971709|chr8:37976881-37978449	8nt
chr8:79648708-79652317	2	chr8	79648708	79652317	-	79648708	79648708	3	54,132,81	0,2030,3528	circRNA	IL7	ENST00000263851	5,4,3	chr8:79646067-79648708|chr8:79652317-79710306	8nt
chr9:96233422-96261168	4	chr9	96233422	96261168	+	96233422	96233422	4	247,83,129,97	0,5115,26330,27649	circRNA	FAM120A	NM_001286724	2,3,4,5	chr9:96214671-96233422|chr9:96261168-96277948	8nt
chr10:104934614-104941085	4	chr10	104934614	104941085	-	104934614	104934614	2	125.144	0.6327	circRNA	NT5C2	NM_001351169	3.2	chr10:104899236-104934614|chr10:104941085-104952992	9nt
chr11:120276826-120278532	6	chr11	120276826	120278532	+	120276826	120276826	2	24.86	0.162	circRNA	ARHGEF12	uc021qrm.1	2.3	chr11:120207984-120276826|chr11:120278532-120291461	9nt
chr11:124517260-124518071	2	chr11	124517260	124518071	-	124517260	124517260	2	134.11	0.701	circRNA	SIAE	ENST00000263593	7.6	chr11:124509763-124517260|chr11:124518071-124519514	9nt
chr11:43852525-43861614	4	chr11	43852525	43861614	+	43852525	43852525	3	35,82,66	0,7341,9023	circRNA	HSD17B12	NM_016142	7,8,9	chr11:43837941-43852525|chr11:43861614-43876264	9nt
chr11:86778735-86802437	4	chr11	86778735	86802437	+	86778735	86778735	3	128,93,34	0,3829,23668	circRNA	TMEM135	uc001pcg.2	2,3,4	chr11:86749228-86778735|chr11:86802437-86889498	9nt
chr12:109046047-109048186	10	chr12	109046047	109048186	-	109046047	109046047	2	146.105	0.2034	circRNA	CORO1C	NM_001105237	8.7	chr12:109042796-109046047|chr12:109048186-109051079	9nt
chr12:118693252-118704564	12	chr12	118693252	118704564	-	118693252	118693252	2	208.105	0.11207	circRNA	TAOK3	uc001twx.3	3.2	chr12:118682770-118693252|chr12:118704564-118797310	9nt
chr14:58690339-58690574	6	chr14	58690339	58690574	+	58690339	58690339	2	80.74	0.161	circRNA	ACTR10	ENST00000545307	9.1	chr14:58686447-58690339|chr14:58690574-58697116	9nt
chr16:15091609-15092262	2	chr16	15091609	15092262	+	15091609	15091609	2	74.66	0.587	circRNA	PDXDC1	ENST00000563679	2.3	chr16:15068661-15091609|chr16:15092262-15095632	9nt
chr17:79536041-79539114	14	chr17	79536041	79539114	-	79536041	79536041	2	96.72	0.3001	circRNA	NPLOC4	NR_130139	3.2	chr17:79534559-79536041|chr17:79539114-79544383	9nt
chr19:18258252-18258434	12	chr19	18258252	18258434	+	18258252	18258252	1	182	0	circRNA	MAST3	NM_015016	26	chr19:18257827-18258252|chr19:18258434-18260000	9nt
chr1:185094075-185106928	2	chr1	185094075	185106928	-	185094075	185094075	3	167,79,191	0,3725,12662	circRNA	TRMT1L	NM_030934	12,11,10	chr1:185093051-185094075|chr1:185106928-185108498	9nt
chr1:65830317-65831879	8	chr1	65830317	65831879	+	65830317	65830317	3	151,50,149	0,1250,1413	circRNA	DNAJC6	ENST00000494710	2,3,4	chr1:65720332-65830317|chr1:65831879-65845084	9nt
chr1:9991948-9994918	6	chr1	9991948	9994918	-	9991948	9991948	3	82,96,99	0,912,2871	circRNA	LZIC	NM_001316975	7,6,5	chr1:9982416-9991948|chr1:9994918-9995549	9nt
chr22:21288066-21288532	12	chr22	21288066	21288532	+	21288066	21288066	1	466	0	circRNA	CRKL	ENST00000354336	2	chr22:21272533-21288066|chr22:21288532-21303998	9nt
chr22:50810448-50810579	4	chr22	50810448	50810579	+	50810448	50810448	1	131	0	circRNA	PPP6R2	ENST00000359139	2	chr22:50781979-50810448|chr22:50810579-50832321	9nt
chr2:109288780-109289485	4	chr2	109288780	109289485	+	109288780	109288780	2	121.15	0.555	circRNA	LIMS1	NM_001193483	4.5	chr2:109287303-109288780|chr2:109289485-109292333	9nt
chr2:136505836-136513261	2	chr2	136505836	136513261	+	136505836	136505836	4	103,29,119,175	0,5272,5892,7250	circRNA	UBXN4	ENST00000272638	2,3,4,5	chr2:136499581-136505836|chr2:136513261-136519387	9nt
chr2:54125006-54128696	4	chr2	54125006	54128696	-	54125006	54125006	4	130,54,137,210	0,431,2011,3480	circRNA	PSME4	ENST00000421748	11,10,9,8	chr2:54124022-54125006|chr2:54128696-54131161	9nt
chr2:9048750-9098771	6	chr2	9048750	9098771	-	9048750	9048750	3	96,78,146	0,34565,49875	circRNA	MBOAT2	NM_001321267	5,4,3	chr2:9028203-9048750|chr2:9098771-9114487	9nt
chr4:129960195-130003528	2	chr4	129960195	130003528	-	129960195	129960195	4	56,73,59,68	0,4354,4952,43265	circRNA	SCLT1	ENST00000281142	5,4,3,2	chr4:129925031-129960195|chr4:130003528-130014224	9nt
chr4:151814203-151821369	6	chr4	151814203	151821369	-	151814203	151814203	4	98,63,80,169	0,3342,4687,6997	circRNA	LRBA	ENST00000535741	17,16,15,14	chr4:151793907-151814203|chr4:151821369-151826989	9nt
chr4:42618049-42629126	4	chr4	42618049	42629126	-	42618049	42618049	4	46,99,100,115	0,8503,9581,10962	circRNA	ATP8A1	ENST00000381668	5,4,3,2	chr4:42602535-42618049|chr4:42629126-42658841	9nt
chr5:122881110-122893258	10	chr5	122881110	122893258	+	122881110	122881110	3	425,41,70	0,7690,12078	circRNA	CSNK1G3	ENST00000345990	2,3,4	chr5:122848264-122881110|chr5:122893258-122909086	9nt
chr5:176468126-176471534	2	chr5	176468126	176471534	+	176468126	176468126	2	104.142	0.3266	circRNA	ZNF346	NM_001308214	2.3	chr5:176449914-176468126|chr5:176471534-176477751	9nt
chr7:77026298-77035422	14	chr7	77026298	77035422	-	77026298	77026298	4	54,70,57,77	0,364,7577,9047	circRNA	GSAP	ENST00000257626	5,4,3,2	chr7:77016765-77026298|chr7:77035422-77045529	9nt
chr8:37971709-37976881	4	chr8	37971709	37976881	+	37971709	37971709	4	96,96,76,94	0,713,2458,5078	circRNA	ASH2L	ENST00000343823	6,7,8,9	chr8:37968351-37971709|chr8:37976881-37978449	9nt
chr8:79648708-79652317	2	chr8	79648708	79652317	-	79648708	79648708	3	54,132,81	0,2030,3528	circRNA	IL7	ENST00000263851	5,4,3	chr8:79646067-79648708|chr8:79652317-79710306	9nt
chr9:96233422-96261168	4	chr9	96233422	96261168	+	96233422	96233422	4	247,83,129,97	0,5115,26330,27649	circRNA	FAM120A	NM_001286724	2,3,4,5	chr9:96214671-96233422|chr9:96261168-96277948	9nt
chr10:74474868-74475660	2	chr10	74474868	74475660	+	74474868	74474868	2	116.49	0.743	circRNA	MCU	uc009xqp.1	3.4	chr10:74468114-74474868|chr10:74475660-74594116	10nt
chr11:120276826-120278532	6	chr11	120276826	120278532	+	120276826	120276826	2	24.86	0.162	circRNA	ARHGEF12	uc021qrm.1	2.3	chr11:120207984-120276826|chr11:120278532-120291461	10nt
chr11:43852525-43861614	4	chr11	43852525	43861614	+	43852525	43852525	3	35,82,66	0,7341,9023	circRNA	HSD17B12	NM_016142	7,8,9	chr11:43837941-43852525|chr11:43861614-43876264	10nt
chr11:86778735-86802437	4	chr11	86778735	86802437	+	86778735	86778735	3	128,93,34	0,3829,23668	circRNA	TMEM135	uc001pcg.2	2,3,4	chr11:86749228-86778735|chr11:86802437-86889498	10nt
chr12:109046047-109048186	10	chr12	109046047	109048186	-	109046047	109046047	2	146.105	0.2034	circRNA	CORO1C	NM_001105237	8.7	chr12:109042796-109046047|chr12:109048186-109051079	10nt
chr12:118693252-118704564	12	chr12	118693252	118704564	-	118693252	118693252	2	208.105	0.11207	circRNA	TAOK3	uc001twx.3	3.2	chr12:118682770-118693252|chr12:118704564-118797310	10nt
chr14:58690339-58690574	6	chr14	58690339	58690574	+	58690339	58690339	2	80.74	0.161	circRNA	ACTR10	ENST00000545307	9.1	chr14:58686447-58690339|chr14:58690574-58697116	10nt
chr17:79536041-79539114	14	chr17	79536041	79539114	-	79536041	79536041	2	96.72	0.3001	circRNA	NPLOC4	NR_130139	3.2	chr17:79534559-79536041|chr17:79539114-79544383	10nt
chr18:9775274-9815219	12	chr18	9775274	9815219	+	9775274	9775274	4	80,82,72,107	0,16876,38742,39838	circRNA	RAB31	ENST00000578921	2,3,4,5	chr18:9708441-9775274|chr18:9815219-9845578	10nt
chr19:13039155-13039661	2	chr19	13039155	13039661	-	13039155	13039155	3	116,129,93	0,193,413	circRNA	FARSA	NM_004461	7,6,5	chr19:13035988-13039155|chr19:13039661-13041036	10nt
chr1:185094075-185106928	2	chr1	185094075	185106928	-	185094075	185094075	3	167,79,191	0,3725,12662	circRNA	TRMT1L	NM_030934	12,11,10	chr1:185093051-185094075|chr1:185106928-185108498	10nt
chr1:65830317-65831879	8	chr1	65830317	65831879	+	65830317	65830317	3	151,50,149	0,1250,1413	circRNA	DNAJC6	ENST00000494710	2,3,4	chr1:65720332-65830317|chr1:65831879-65845084	10nt
chr1:67356836-67371058	2	chr1	67356836	67371058	-	67356836	67356836	3	113,185,175	0,2075,14047	circRNA	WDR78	ENST00000371026	4,3,2	chr1:67340620-67356836|chr1:67371058-67390344	10nt
chr1:7837219-7838229	4	chr1	7837219	7838229	+	7837219	7837219	2	159.52	0.958	circRNA	VAMP3	ENST00000054666	3.4	chr1:7833571-7837219|chr1:7838229-7839685	10nt
chr22:21288066-21288532	12	chr22	21288066	21288532	+	21288066	21288066	1	466	0	circRNA	CRKL	ENST00000354336	2	chr22:21272533-21288066|chr22:21288532-21303998	10nt
chr22:50810448-50810579	4	chr22	50810448	50810579	+	50810448	50810448	1	131	0	circRNA	PPP6R2	ENST00000359139	2	chr22:50781979-50810448|chr22:50810579-50832321	10nt
chr2:109288780-109289485	2	chr2	109288780	109289485	+	109288780	109288780	2	121.15	0.555	circRNA	LIMS1	NM_001193483	4.5	chr2:109287303-109288780|chr2:109289485-109292333	10nt
chr2:113057425-113057606	6	chr2	113057425	113057606	+	113057425	113057425	1	181	0	circRNA	ZC3H6	ENST00000409871	2	chr2:113033603-113057425|chr2:113057606-113060805	10nt
chr2:136505836-136513261	2	chr2	136505836	136513261	+	136505836	136505836	4	103,29,119,175	0,5272,5892,7250	circRNA	UBXN4	ENST00000272638	2,3,4,5	chr2:136499581-136505836|chr2:136513261-136519387	10nt
chr2:238896604-238903451	10	chr2	238896604	238903451	+	238896604	238896604	2	30.66	0.6781	circRNA	UBE2F	ENST00000440223	4.5	chr2:238894934-238896604|chr2:238903451-238933982	10nt
chr2:9048750-9098771	6	chr2	9048750	9098771	-	9048750	9048750	3	96,78,146	0,34565,49875	circRNA	MBOAT2	NM_001321267	5,4,3	chr2:9028203-9048750|chr2:9098771-9114487	10nt
chr4:129042980-129083472	2	chr4	129042980	129083472	+	129042980	129042980	2	363.124	0.40368	circRNA	LARP1B	NM_018078	11.12	chr4:129035897-129042980|chr4:129083472-129098026	10nt
chr4:129960195-130003528	2	chr4	129960195	130003528	-	129960195	129960195	4	56,73,59,68	0,4354,4952,43265	circRNA	SCLT1	ENST00000281142	5,4,3,2	chr4:129925031-129960195|chr4:130003528-130014224	10nt
chr4:151814203-151821369	6	chr4	151814203	151821369	-	151814203	151814203	4	98,63,80,169	0,3342,4687,6997	circRNA	LRBA	ENST00000535741	17,16,15,14	chr4:151793907-151814203|chr4:151821369-151826989	10nt
chr4:42618049-42629126	4	chr4	42618049	42629126	-	42618049	42618049	4	46,99,100,115	0,8503,9581,10962	circRNA	ATP8A1	ENST00000381668	5,4,3,2	chr4:42602535-42618049|chr4:42629126-42658841	10nt
chr5:122881110-122893258	10	chr5	122881110	122893258	+	122881110	122881110	3	425,41,70	0,7690,12078	circRNA	CSNK1G3	ENST00000345990	2,3,4	chr5:122848264-122881110|chr5:122893258-122909086	10nt
chr5:176468126-176471534	2	chr5	176468126	176471534	+	176468126	176468126	2	104.142	0.3266	circRNA	ZNF346	NM_001308214	2.3	chr5:176449914-176468126|chr5:176471534-176477751	10nt
chr7:104702610-104707254	4	chr7	104702610	104707254	+	104702610	104702610	3	115,230,81	0,1187,4563	circRNA	KMT2E	ENST00000311117	4,5,6	chr7:104681470-104702610|chr7:104707254-104714065	10nt
chr8:37971709-37976881	4	chr8	37971709	37976881	+	37971709	37971709	4	96,96,76,94	0,713,2458,5078	circRNA	ASH2L	ENST00000343823	6,7,8,9	chr8:37968351-37971709|chr8:37976881-37978449	10nt
chr8:71126137-71128999	6	chr8	71126137	71128999	-	71126137	71126137	2	173.105	0.2757	circRNA	NCOA2	NM_001321712	4.3	chr8:71087094-71126137|chr8:71128999-71208978	10nt
chr8:79648708-79652317	2	chr8	79648708	79652317	-	79648708	79648708	3	54,132,81	0,2030,3528	circRNA	IL7	ENST00000263851	5,4,3	chr8:79646067-79648708|chr8:79652317-79710306	10nt
chr9:79828149-79834997	2	chr9	79828149	79834997	+	79828149	79828149	3	81,58,128	0,1095,6720	circRNA	VPS13A	ENST00000376634	9,10,11	chr9:79827944-79828149|chr9:79834997-79835192	10nt
chr9:96233422-96261168	4	chr9	96233422	96261168	+	96233422	96233422	4	247,83,129,97	0,5115,26330,27649	circRNA	FAM120A	NM_001286724	2,3,4,5	chr9:96214671-96233422|chr9:96261168-96277948	10nt
chrX:122799492-122805612	2	chrX	122799492	122805612	-	122799492	122799492	4	196,173,156,93	0,1464,2517,6027	circRNA	THOC2	NM_001081550	12,11,10,9	chrX:122779226-122799492|chrX:122805612-122820397	10nt
chrX:84322132-84329397	6	chrX	84322132	84329397	+	84322132	84322132	3	92,114,118	0,6871,7147	circRNA	APOOL	ENST00000373173	6,7,8	chrX:84310931-84322132|chrX:84329397-84342595	10nt
chr10:74474868-74475660	2	chr10	74474868	74475660	+	74474868	74474868	2	116.49	0.743	circRNA	MCU	uc009xqp.1	3.4	chr10:74468114-74474868|chr10:74475660-74594116	11nt
chr11:86778735-86802437	4	chr11	86778735	86802437	+	86778735	86778735	3	128,93,34	0,3829,23668	circRNA	TMEM135	uc001pcg.2	2,3,4	chr11:86749228-86778735|chr11:86802437-86889498	11nt
chr12:109046047-109048186	10	chr12	109046047	109048186	-	109046047	109046047	2	146.105	0.2034	circRNA	CORO1C	NM_001105237	8.7	chr12:109042796-109046047|chr12:109048186-109051079	11nt
chr12:118693252-118704564	12	chr12	118693252	118704564	-	118693252	118693252	2	208.105	0.11207	circRNA	TAOK3	uc001twx.3	3.2	chr12:118682770-118693252|chr12:118704564-118797310	11nt
chr14:58690339-58690574	6	chr14	58690339	58690574	+	58690339	58690339	2	80.74	0.161	circRNA	ACTR10	ENST00000545307	9.1	chr14:58686447-58690339|chr14:58690574-58697116	11nt
chr17:57814813-57816308	2	chr17	57814813	57816308	+	57814813	57814813	2	91.111	0.1384	circRNA	VMP1	ENST00000262291	4.5	chr17:57812834-57814813|chr17:57816308-57842331	11nt
chr17:79536041-79539114	14	chr17	79536041	79539114	-	79536041	79536041	2	96.72	0.3001	circRNA	NPLOC4	NR_130139	3.2	chr17:79534559-79536041|chr17:79539114-79544383	11nt
chr19:13039155-13039661	2	chr19	13039155	13039661	-	13039155	13039155	3	116,129,93	0,193,413	circRNA	FARSA	NM_004461	7,6,5	chr19:13035988-13039155|chr19:13039661-13041036	11nt
chr1:185094075-185106928	2	chr1	185094075	185106928	-	185094075	185094075	3	167,79,191	0,3725,12662	circRNA	TRMT1L	NM_030934	12,11,10	chr1:185093051-185094075|chr1:185106928-185108498	11nt
chr1:21329205-21437876	2	chr1	21329205	21437876	-	21329205	21329205	4	96,129,76,61	0,48153,86425,108610	circRNA	EIF4G3	ENST00000356916	7,6,5,4	chr1:21324126-21329205|chr1:21437876-21494453	11nt
chr1:65830317-65831879	8	chr1	65830317	65831879	+	65830317	65830317	3	151,50,149	0,1250,1413	circRNA	DNAJC6	ENST00000494710	2,3,4	chr1:65720332-65830317|chr1:65831879-65845084	11nt
chr22:50810448-50810579	4	chr22	50810448	50810579	+	50810448	50810448	1	131	0	circRNA	PPP6R2	ENST00000359139	2	chr22:50781979-50810448|chr22:50810579-50832321	11nt
chr2:238896604-238903451	8	chr2	238896604	238903451	+	238896604	238896604	2	30.66	0.6781	circRNA	UBE2F	ENST00000440223	4.5	chr2:238894934-238896604|chr2:238903451-238933982	11nt
chr2:9048750-9098771	6	chr2	9048750	9098771	-	9048750	9048750	3	96,78,146	0,34565,49875	circRNA	MBOAT2	NM_001321267	5,4,3	chr2:9028203-9048750|chr2:9098771-9114487	11nt
chr3:182788786-182789145	8	chr3	182788786	182789145	-	182788786	182788786	2	122.148	0.211	circRNA	MCCC1	NR_120640	7.6	chr3:182775210-182788786|chr3:182789145-182790153	11nt
chr4:129960195-130003528	2	chr4	129960195	130003528	-	129960195	129960195	4	56,73,59,68	0,4354,4952,43265	circRNA	SCLT1	ENST00000281142	5,4,3,2	chr4:129925031-129960195|chr4:130003528-130014224	11nt
chr4:151814203-151821369	6	chr4	151814203	151821369	-	151814203	151814203	4	98,63,80,169	0,3342,4687,6997	circRNA	LRBA	ENST00000535741	17,16,15,14	chr4:151793907-151814203|chr4:151821369-151826989	11nt
chr5:122881110-122893258	10	chr5	122881110	122893258	+	122881110	122881110	3	425,41,70	0,7690,12078	circRNA	CSNK1G3	ENST00000345990	2,3,4	chr5:122848264-122881110|chr5:122893258-122909086	11nt
chr5:176468126-176471534	2	chr5	176468126	176471534	+	176468126	176468126	2	104.142	0.3266	circRNA	ZNF346	NM_001308214	2.3	chr5:176449914-176468126|chr5:176471534-176477751	11nt
chr7:104702610-104707254	4	chr7	104702610	104707254	+	104702610	104702610	3	115,230,81	0,1187,4563	circRNA	KMT2E	ENST00000311117	4,5,6	chr7:104681470-104702610|chr7:104707254-104714065	11nt
chr8:79648708-79652317	2	chr8	79648708	79652317	-	79648708	79648708	3	54,132,81	0,2030,3528	circRNA	IL7	ENST00000263851	5,4,3	chr8:79646067-79648708|chr8:79652317-79710306	11nt
chr9:79828149-79834997	2	chr9	79828149	79834997	+	79828149	79828149	3	81,58,128	0,1095,6720	circRNA	VPS13A	ENST00000376634	9,10,11	chr9:79827944-79828149|chr9:79834997-79835192	11nt
chr9:96233422-96261168	4	chr9	96233422	96261168	+	96233422	96233422	4	247,83,129,97	0,5115,26330,27649	circRNA	FAM120A	NM_001286724	2,3,4,5	chr9:96214671-96233422|chr9:96261168-96277948	11nt
chrX:122799492-122805612	2	chrX	122799492	122805612	-	122799492	122799492	4	196,173,156,93	0,1464,2517,6027	circRNA	THOC2	NM_001081550	12,11,10,9	chrX:122779226-122799492|chrX:122805612-122820397	11nt
chr10:88211723-88221044	4	chr10	88211723	88221044	-	88211723	88211723	6	165,116,176,77,98,112	0,1253,1689,7022,8432,9209	circRNA	WAPAL	uc001kdn.3	16,15,14,13,12,11	chr10:88206206-88211723|chr10:88221044-88227035	12nt
chr12:118693252-118704564	12	chr12	118693252	118704564	-	118693252	118693252	2	208.105	0.11207	circRNA	TAOK3	uc001twx.3	3.2	chr12:118682770-118693252|chr12:118704564-118797310	12nt
chr17:57814813-57816308	2	chr17	57814813	57816308	+	57814813	57814813	2	91.111	0.1384	circRNA	VMP1	ENST00000262291	4.5	chr17:57812834-57814813|chr17:57816308-57842331	12nt
chr1:180031354-180034407	4	chr1	180031354	180034407	+	180031354	180031354	2	147.158	0.2895	circRNA	CEP350	ENST00000367607	26.27	chr1:180023637-180031354|chr1:180034407-180044156	12nt
chr2:238896604-238903451	8	chr2	238896604	238903451	+	238896604	238896604	2	30.66	0.6781	circRNA	UBE2F	ENST00000440223	4.5	chr2:238894934-238896604|chr2:238903451-238933982	12nt
chr2:9048750-9098771	6	chr2	9048750	9098771	-	9048750	9048750	3	96,78,146	0,34565,49875	circRNA	MBOAT2	NM_001321267	5,4,3	chr2:9028203-9048750|chr2:9098771-9114487	12nt
chr4:129960195-130003528	2	chr4	129960195	130003528	-	129960195	129960195	4	56,73,59,68	0,4354,4952,43265	circRNA	SCLT1	ENST00000281142	5,4,3,2	chr4:129925031-129960195|chr4:130003528-130014224	12nt
chr5:176468126-176471534	2	chr5	176468126	176471534	+	176468126	176468126	2	104.142	0.3266	circRNA	ZNF346	NM_001308214	2.3	chr5:176449914-176468126|chr5:176471534-176477751	12nt
chr5:80911291-80946158	6	chr5	80911291	80946158	-	80911291	80911291	3	85,62,73	0,21084,34794	circRNA	SSBP2	NM_001256732	4,3,2	chr5:80809536-80911291|chr5:80946158-81046799	12nt
chr8:79648708-79652317	2	chr8	79648708	79652317	-	79648708	79648708	3	54,132,81	0,2030,3528	circRNA	IL7	ENST00000263851	5,4,3	chr8:79646067-79648708|chr8:79652317-79710306	12nt
chr14:81837331-81837529	2	chr14	81837331	81837529	-	81837331	81837331	1	198	0	circRNA	STON2	NM_033104	4	chr14:81745083-81837331|chr14:81837529-81862237	13nt
chr1:180031354-180034407	4	chr1	180031354	180034407	+	180031354	180031354	2	147.158	0.2895	circRNA	CEP350	ENST00000367607	26.27	chr1:180023637-180031354|chr1:180034407-180044156	13nt
chr4:129960195-130003528	2	chr4	129960195	130003528	-	129960195	129960195	4	56,73,59,68	0,4354,4952,43265	circRNA	SCLT1	ENST00000281142	5,4,3,2	chr4:129925031-129960195|chr4:130003528-130014224	13nt
chr8:141710989-141716304	2	chr8	141710989	141716304	-	141710989	141710989	3	132,138,87	0,1679,5228	circRNA	PTK2	ENST00000522684	26,25,24	chr8:141696793-141710989|chr8:141716304-141727696	13nt
chr12:32760890-32764217	2	chr12	32760890	32764217	+	32760890	32760890	3	139,59,147	0,2819,3180	circRNA	FGD4	ENST00000534526	8,9,10	chr12:32755251-32760890|chr12:32764217-32772631	14nt
chr20:49518553-49521386	2	chr20	49518553	49521386	-	49518553	49518553	3	93,113,84	0,1872,2749	circRNA	ADNP	NM_001282531	5,4,3	chr20:49511049-49518553|chr20:49521386-49545187	14nt

## Sheet: riboCLR Erys
Gene.name	Globin1_mRNA	Globin2_mRNA	Gold1_mRNA	Gold2_mRNA	CDS.Length	lin_reads_avg	lin_reads_per_k	ID	circRNA_length	circ_Globin1	circ_Globin2	circ_Gold1	circ_Gold2	circ_read_avg	circ_reads_per_k	ratio_circ_lin_RFP
BNIP3L	2055	3087	2426	1561	660	2282.25	3457.95	chr8:26265515-26265892	254	268	352	211	172	271.25	1067.91	0.308828
CALM2	137.097	165.783	108.045	72.736	591	120.915	204.594	chr2:47388861-47397903	418	120	145	95	66	194.5	465.311	2.27431
CAPZA1	98.991	170.9	118	72.777	861	115.167	133.76	chr1:113196219-113202401	430	57	85	64	31	159	369.767	2.76442
EMC3	58	103.041	51	52	786	66.0102	83.9825	chr3:10011402-10019130	502	49	90	35	41	169	336.653	4.00861
EPB41	328	487.31	343.999	246	2595	351.327	135.386	chr1:29313942-29379824	1852	119.131	96.071	92.565	63.955	539.942	291.545	2.15343
EPB41	328	487.31	343.999	246	2595	351.327	135.386	chr1:29386933-29424447	369	25.873	38.061	36	19.616	117.234	317.706	2.34666
EPB41	328	487.31	343.999	246	2595	351.327	135.386	chr1:29313942-29314417	475	0	0	0	0	118.75	250	1.84657
EPB41	328	487.31	343.999	246	2595	351.327	135.386	chr1:29313942-29338419	836	0	0	0	0	209	250	1.84657
EPB41	328	487.31	343.999	246	2595	351.327	135.386	chr1:29362337-29379824	480	0	29.078	20.416	6.69	132.374	275.778	2.03697
EPB41	328	487.31	343.999	246	2595	351.327	135.386	chr1:29313942-29342279	912	0	0	0	0	228	250	1.84657
EPB41	328	487.31	343.999	246	2595	351.327	135.386	chr1:29362337-29391670	819	0	0	0	0	204.75	250	1.84657
EPB41	328	487.31	343.999	246	2595	351.327	135.386	chr1:29319841-29323831	318	0	0	0	0	79.5	250	1.84657
EPB41	328	487.31	343.999	246	2595	351.327	135.386	chr1:29313942-29344954	1131	0	0	0	0	282.75	250	1.84657
EPB41	328	487.31	343.999	246	2595	351.327	135.386	chr1:29313942-29320054	688	0	0	0	0	172	250	1.84657
EPB41	328	487.31	343.999	246	2595	351.327	135.386	chr1:29313942-29391670	2191	32.265	0	0	19.004	555.816	253.682	1.87376
EPB41	328	487.31	343.999	246	2595	351.327	135.386	chr1:29313942-29365938	1643	60.657	150.444	66.684	50.814	480.196	292.268	2.15877
EPB41	328	487.31	343.999	246	2595	351.327	135.386	chr1:29379615-29391670	548	0	10.244	0	0	139.561	254.673	1.88109
EPB41	328	487.31	343.999	246	2595	351.327	135.386	chr1:29362337-29365938	271	0	0	0	0	67.75	250	1.84657
EPB41	328	487.31	343.999	246	2595	351.327	135.386	chr1:29313942-29323831	793	0	0	0	0	198.25	250	1.84657
EPB41	328	487.31	343.999	246	2595	351.327	135.386	chr1:29319841-29344954	656	73.075	159.101	101.336	68.92	247.378	377.101	2.78537
FBXO7	647.001	901.999	591.999	397.999	1569	634.75	404.557	chr22:32874967-32881196	665	201.037	245.657	146.022	122.075	314.429	472.826	1.16875
FBXO7	647.001	901.999	591.999	397.999	1569	634.75	404.557	chr22:32874967-32875262	295	257.963	424.343	193.978	112.925	292.821	992.614	2.45358
FBXO9	211.845	339.13	652.711	378.84	1344	395.632	294.369	chr6:52935854-52941341	304	0	3	7	2	78.5	258.224	0.877212
FKBP8	773.999	1020	1294	717.525	1242	951.381	766.007	chr19:18650180-18650530	259	107	148	226	106	185	714.286	0.932479
FKBP8	773.999	1020	1294	717.525	1242	951.381	766.007	chr19:18648410-18649246	394	164	232	276	154	266.5	676.396	0.883015
HNRNPA2B1	302	440	317	277	1062	334	314.501	chr7:26235466-26237352	715	0	0	0	0	178.75	250	0.79491
HNRNPA2B1	302	440	317	277	1062	334	314.501	chr7:26236020-26237352	652	81.777	116.709	33.22	70.886	220.927	338.844	1.0774
HNRNPA2B1	302	440	317	277	1062	334	314.501	chr7:26232114-26237352	1041	196.223	308.291	249.78	178.114	448.824	431.146	1.37089
HNRNPC	97.001	156	90.001	76.228	921	104.808	113.798	chr14:21698477-21702388	401	49	66	36	37	138	344.14	3.02414
HNRNPM	121	155	142	99	2193	129.25	58.9375	chr19:8520288-8530399	400	18.898	35.966	18.25	11.454	118.278	295.696	5.01711
HNRNPM	121	155	142	99	2193	129.25	58.9375	chr19:8520288-8528570	325	0	0	0	0	81.25	250	4.24178
HNRNPM	121	155	142	99	2193	129.25	58.9375	chr19:8530207-8539128	565	33.102	48.034	44.75	19.546	172.721	305.702	5.18688
HNRNPU	117.001	172.202	147.001	88	2478	131.051	52.8858	chr1:245020899-245021576	384	19	28	34	14	116.25	302.734	5.7243
MORF4L1	62.773	77.934	52.93	45.987	1089	59.906	55.0101	chr15:79178482-79187246	732	19.652	33.136	23	27	201.947	275.884	5.01515
MORF4L1	62.773	77.934	52.93	45.987	1089	59.906	55.0101	chr15:79183330-79186572	479	10.348	18.864	0	0	127.053	265.246	4.82178
MORF4L1	62.773	77.934	52.93	45.987	1089	59.906	55.0101	chr15:79178482-79186572	647	0	0	0	0	161.75	250	4.54462
MPP1	101.001	155	134.999	90	1401	120.25	85.8315	chrX:154018228-154020560	378	31	52	26	22	121.75	322.09	3.75258
NCOA4	390.844	536.727	535.924	336.975	1953	450.118	230.475	chr10:51579127-51581378	494	33.593	57.231	34.086	25.662	154.727	313.214	1.35899
NCOA4	390.844	536.727	535.924	336.975	1953	450.118	230.475	chr10:51584615-51585599	984	0	3.878	17.025	0	251.226	255.311	1.10776
NCOA4	390.844	536.727	535.924	336.975	1953	450.118	230.475	chr10:51579127-51586411	1853	392.407	512.891	513.888	317.338	818.047	441.471	1.91549
PHIP	1466.51	1510.2	980.257	949.376	5466	1226.59	224.403	chr6:79752559-79770535	411	0	2	0	1	103.25	251.217	1.11949
PIP4K2A	53	104.513	107	53	1221	79.3782	65.0109	chr10:22839587-22898646	648	27	51	42	30	192	296.296	4.55764
PIP4K2A	53	104.513	107	53	1221	79.3782	65.0109	chr10:22880557-22898646	348	0	0	0	0	87	250	3.84551
PTGES3	28.124	80.115	38.153	24.88	495	42.818	86.501	chr12:57065532-57066849	283	0	22.928	10.686	6.481	79.1535	279.694	3.23342
PTGES3	28.124	80.115	38.153	24.88	495	42.818	86.501	chr12:57059987-57066849	436	37	46.072	19.314	20.519	134.596	308.708	3.56883
RIOK3	61	111.001	87.999	66	1560	81.5	52.2436	chr18:21043930-21046240	508	0	0	0	0	127	250	4.78528
RIOK3	61	111.001	87.999	66	1560	81.5	52.2436	chr18:21042927-21046240	624	39	66	44	31	193.25	309.696	5.92791
RNF10	327	374.193	301	200.999	2451	300.798	122.725	chr12:121000747-121004783	913	0	0	0	0	228.25	250	2.03708
RNF10	327	374.193	301	200.999	2451	300.798	122.725	chr12:120995084-121004783	1396	24.932	83	48.271	0	388.051	277.973	2.26502
RNF10	327	374.193	301	200.999	2451	300.798	122.725	chr12:121000747-121001746	537	18.832	0	0	19	138.958	258.767	2.10852
RNF10	327	374.193	301	200.999	2451	300.798	122.725	chr12:120995084-120998689	483	12.662	0	10.821	16	126.621	262.155	2.13612
RNF10	327	374.193	301	200.999	2451	300.798	122.725	chr12:121002874-121004783	376	10.573	0	0	7	96.6432	257.03	2.09436
RNF10	327	374.193	301	200.999	2451	300.798	122.725	chr12:120998528-121001746	698	0	0	9.908	0	176.977	253.549	2.066
RNF10	327	374.193	301	200.999	2451	300.798	122.725	chr12:120995084-120995485	322	0	0	0	0	80.5	250	2.03708
SKP1	187.214	236.275	148.947	124.417	492	174.213	354.092	chr5:133494145-133509713	456	189	251	152	131	262	574.561	1.62263
TMEM50A	26	34.609	26	12	474	24.6522	52.009	chr1:25666964-25678184	287	12	16	9	4	81	282.23	5.42656
YWHAZ	149.61	223.943	148	130.231	739	162.946	220.495	chr8:101936182-101937267	384	72	123	81	63	165	429.688	1.94874

## Sheet: riboCLR Mk
Gene_ID	lin_reads_per_k_avg	circ_reads_per_k_avg	CLR_MK_ribo_avg
AAGAB	1527.78	1890.69	1.20144
AARS	7339.2	184.246	0.0153375
AARS	7339.2	8102.7	1.09819
AATF	1418.7	1577.77	1.07208
ABCC1	1248.09	1910.77	1.49262
ABCC1	1248.09	1730.71	1.40654
ABCC4	9529.96	462.587	0.0501759
ABCC4	9529.96	1629.13	0.140686
ABCC4	9529.96	1496.29	0.192708
ABCC4	9529.96	4327.46	0.467227
ABCC4	9529.96	3403.01	0.371919
ABCC4	9529.96	455.194	0.055444
ABCC4	9529.96	2180.27	0.211634
ABCC4	9529.96	860.947	0.123963
ABCC4	9529.96	2738.29	0.254691
ABCC4	9529.96	6562.44	0.714722
ABCC4	9529.96	1766.81	0.187058
ABCC4	9529.96	1812.38	0.151511
ABCC4	9529.96	1833.62	0.194304
ABCC4	9529.96	7126.67	0.732302
ABCC4	9529.96	6228.05	0.641803
ABCC4	9529.96	417.194	0.0356548
ABCC4	9529.96	1377.54	0.16324
ABHD2	5540.76	5867.75	1.0622
ACACA	325.108	274.711	0.832941
ACADM	3184.66	4062.89	1.21284
ACAP2	1645.23	1205.46	0.705723
ACER3	3084.38	2372.79	0.752774
ACSF3	445.267	428.9	0.953767
ACTN1	23947.2	35091.6	1.44331
ACTR2	30530.8	33119.3	1.07291
ACTR3B	310.812	1224	3.85482
ACTR3B	310.812	484.299	1.53095
ACVR2A	87.2197	71.8816	0.783466
ADAL	317.951	174.603	0.521544
ADAM10	12136.3	13464.3	1.08517
ADAM10	12136.3	5604.24	0.442503
ADARB1	132.255	59.1954	0.429065
ADPGK	935.614	1456.75	1.5073
AEBP2	962.887	1000.06	1.05568
AEBP2	962.887	1523.76	1.5571
AFF1	1894.68	1845.41	0.960053
AFF1	1894.68	1457.32	0.742843
AFF2	130.82	86.898	0.689609
AFF4	1170.54	2189.9	1.85655
AFTPH	1162.87	1434.52	1.24025
AFTPH	1162.87	1096.61	0.930264
AGGF1	266.128	325.416	1.1988
AGK	1206.7	1130.51	0.945426
AGO3	380.065	328.877	0.843534
AGPAT5	3924.5	4368.19	1.10277
AGTPBP1	246.807	102.11	0.395994
AGTPBP1	246.807	117.027	0.497601
AHCTF1	568.931	853.168	1.5758
AHCTF1	568.931	604.751	1.11075
AHRR	295.334	324.106	1.0857
AKT2	2331.63	2415.99	1.04267
AKT3	215.095	392.027	1.9708
ALS2	328.207	523.099	1.59542
AMBRA1	299.29	342.251	1.13916
AMD1	2488.23	2445.32	1.03349
AMFR	1070.48	1056.5	0.981853
AMOTL1	400.096	398.228	0.98807
ANGPT1	5989.92	5556.2	0.917052
ANGPT1	5989.92	649.79	0.0788846
ANK1	1256.38	1171.85	0.92884
ANKHD1	493.299	759.19	1.44909
ANKHD1	493.299	610.818	1.32199
ANKIB1	169.101	193.273	1.13793
ANKLE2	1106	1287.47	1.14381
ANKMY1	74.4159	208.165	2.64155
ANKRD11	469.132	606.319	1.2371
ANKRD11	469.132	834.567	1.67871
ANKRD11	469.132	1170.94	2.57815
ANKRD12	327.041	523.139	1.57477
ANKRD13C	435.834	373.824	0.842125
ANKRD17	601.337	677.149	1.11999
ANO10	973.606	678.744	0.691286
ANXA7	9021.05	7464.07	0.861872
AP4E1	187.584	232.035	1.28708
AP4S1	1928.5	1363.47	0.691899
APBA2	565.769	120.106	0.155673
APBA2	565.769	403.804	0.738878
APLF	304.602	173.935	0.500086
APLF	304.602	299.236	1.03129
APPL1	785.632	584.449	0.711468
ARAP1	1402.68	1518.95	1.10876
ARCN1	6229.13	7358.04	1.16843
ARFGEF1	585.636	662.28	1.13171
ARFGEF2	436.803	547.149	1.19749
ARHGAP10	172.743	182.809	0.96047
ARHGAP10	172.743	231.026	1.30854
ARHGAP12	121.28	113.77	0.91354
ARHGAP18	6789.47	7949.4	1.17602
ARHGAP21	1000.09	1186.86	1.19368
ARHGAP32	172.341	219.136	1.27811
ARHGAP32	172.341	115.605	0.652051
ARHGAP32	172.341	165.165	0.87756
ARHGAP5	345.023	361.208	1.04012
ARHGAP6	3970.66	5679.98	1.4069
ARHGEF12	750.445	606.462	0.798528
ARHGEF12	750.445	218.057	0.371724
ARHGEF7	1487.19	371.941	0.351224
ARHGEF7	1487.19	799.038	0.504019
ARHGEF7	1487.19	898.91	0.629184
ARHGEF9	1064.16	1034.28	0.950262
ARID2	678.867	729.298	1.04273
ARID2	678.867	811.413	1.18951
ARID4A	227.787	256.857	1.13791
ARIH1	2003.95	1252.76	0.642581
ARL13B	486.295	4477.34	14.0534
ARL8B	10362.6	10837.6	1.01577
ARMC8	2596.12	1873.49	0.741051
ARMC8	2596.12	558.593	0.188904
ARPC1B	16458.9	17296.6	1.06511
ARPC1B	16458.9	16939.9	1.0046
ASAP1	1425.55	899.543	0.600461
ASAP1	1425.55	221.973	0.114714
ASAP1	1425.55	1927.02	1.24769
ASAP2	2604.38	549.254	0.185095
ASAP2	2604.38	2670.47	0.983995
ASAP2	2604.38	2685.29	1.10684
ASCC3	237.277	310.325	1.30073
ASCC3	237.277	300.725	1.24097
ASH1L	134.12	223.507	1.62811
ASH1L	134.12	89.4093	0.705606
ASH2L	2941.75	3133.52	1.0596
ASPH	827.511	1678.08	1.96344
ASPH	827.511	1099.9	1.28195
ASXL1	446.421	516.894	1.0843
ASXL1	446.421	1439.29	3.17845
ASXL2	515.746	695.509	1.33993
ATAD2	932.506	861.361	0.935956
ATAD2	932.506	950.429	1.00592
ATAD2B	314.118	306.142	1.00421
ATF1	2001.77	2027.94	1.00824
ATF6	2079.55	2255.01	1.09582
ATF6	2079.55	1875	0.893222
ATF7IP	1334.2	1283.49	0.952577
ATL2	852.393	993.879	1.13463
ATM	119.081	117.581	1.00208
ATM	119.081	100.683	0.802929
ATP11B	981.843	752.994	0.693499
ATP23	363.247	428.728	1.18222
ATP2C1	7426.65	7759.37	1.04563
ATP6V0A1	3743.35	4494.37	1.21375
ATP6V0A2	3023.69	2541.8	0.815073
ATP7A	235.838	211.556	0.863865
ATP8A1	1011.73	628.704	0.624805
ATP8A1	1011.73	724.835	0.708964
ATP8A1	1011.73	358.544	0.410332
ATP8A1	1011.73	955.243	0.896592
ATP9B	443.027	469.586	1.06765
ATXN10	4768.09	2387.14	0.507177
ATXN10	4768.09	3596.8	0.757005
ATXN10	4768.09	293.075	0.087435
ATXN10	4768.09	674.751	0.0991635
ATXN2	666.33	847.396	1.19299
ATXN2	666.33	623.342	0.932374
ATXN7	416.053	144.802	0.383469
ATXN7	416.053	862.692	2.31325
AURKA	2586.15	2442.68	0.932517
AXIN1	600.875	790.233	1.28887
AXIN1	600.875	516.643	0.875037
AXIN1	600.875	737.589	1.31327
AZIN1	4176.5	1996.02	0.469218
BABAM1	1945.57	2519.97	1.28799
BACH1	1575.82	1758.62	1.10438
BANP	324.205	384.301	1.20318
BANP	324.205	341.01	1.03537
BARD1	462.653	59.313	0.113817
BARD1	462.653	436.439	0.944341
BAZ1A	753.087	73.4337	0.112354
BAZ1A	753.087	799.218	1.02592
BAZ1B	1182.69	118.518	0.120671
BAZ1B	1182.69	950.311	0.792917
BBS9	67.9345	70.6402	1.00873
BBX	612.082	611.066	0.977583
BCAT1	12966.3	17982.3	1.37326
BFAR	1215.83	1222.72	1.0215
BIN2	10861.2	15526.6	1.33519
BIRC2	555.366	499.551	0.874315
BIRC6	403.858	345.588	0.843652
BIRC6	403.858	552.469	1.36468
BIRC6	403.858	495.468	1.23194
BIRC6	403.858	454.694	1.11641
BIRC6	403.858	530.944	1.30693
BIRC6	403.858	723.86	1.79321
BLVRB	9752.14	11750.3	1.20867
BMP2K	2492.48	3893.19	1.62031
BMP2K	2492.48	232.548	0.0662312
BMPR2	356.966	460.526	1.27914
BRAF	482.847	590.307	1.2068
BRAP	825.184	716.867	0.896842
BRCA1	237.209	257.53	1.02341
BRIP1	177.184	181.124	1.01597
BRIP1	177.184	165.762	0.940232
BRWD1	222.225	113.059	0.486334
BRWD3	230.885	142.505	0.608868
BTAF1	301.411	233.17	0.778957
BTBD10	1408.43	552.293	0.388755
BTBD10	1408.43	957.001	0.664714
BTBD7	326.416	348.58	1.04227
BUB1	1770.97	1639.17	0.912361
BZW2	2346.62	2651.04	1.13534
C17orf53	228.481	233.126	1.05219
C17orf80	541.53	570.833	1.04497
C2orf42	206.65	214.588	1.03271
C6orf136	445.45	709.195	1.5535
CACTIN	195.659	286.667	1.44203
CAMLG	1282.32	1103.73	0.86561
CAMSAP1	178.198	115.315	0.718388
CAMSAP1	178.198	129.85	0.68112
CAMTA1	524.393	4752.59	8.95363
CANX	19804.9	3491.15	0.222134
CANX	19804.9	2800.96	0.155684
CANX	19804.9	17241	0.947036
CANX	19804.9	23297.7	1.15771
CANX	19804.9	8489.55	0.365589
CAP1	46720	55408.7	1.15474
CAPRIN1	7770.03	10587.6	1.33703
CAPRIN1	7770.03	7723.3	0.996377
CAPZA1	14553.7	18112.8	1.25497
CARF	68.0957	57.0437	0.900547
CARMIL1	1109.61	913.519	0.83397
CARMIL1	1109.61	891.865	0.899454
CARMIL1	1109.61	1760.06	1.59706
CARNMT1	691.547	832.407	1.14535
CASC4	1152.55	1252.06	1.06718
CASP2	2681.67	2861.33	1.07444
CASP8AP2	230.624	410.661	1.76961
CBFA2T2	320.952	353.554	1.11171
CBFB	3338.22	4682.83	1.42542
CCAR1	1293.55	1706.3	1.30792
CCAR1	1293.55	1342.76	1.01382
CCDC126	523.939	257.18	0.481637
CCDC134	578.744	624.592	1.06191
CCDC14	553.243	605.725	1.10473
CCDC18	84.2171	86.2999	1.03936
CCDC18	84.2171	94.1238	1.11116
CCDC66	100.712	101.496	1.03966
CCDC66	100.712	122.842	1.26034
CCDC9	620.453	574.935	0.927365
CCDC91	531.426	241.68	0.460295
CCDC91	531.426	404.639	0.687377
CCDC91	531.426	346.927	0.684844
CCNB1	5886.07	6237.21	1.07233
CCNT2	386.761	213.847	0.550692
CCNYL1	270.64	273.667	1.00395
CCSER2	138.854	143.045	1.05001
CCSER2	138.854	134.604	0.954323
CCSER2	138.854	109.409	0.777344
CCT2	6783.27	119.735	0.0349893
CCT2	6783.27	5206.97	0.728229
CCZ1B	654.896	2307.26	3.44835
CCZ1B	654.896	3177.7	4.77513
CD109	1198.81	1704.3	1.43325
CD226	11705.9	9058.81	0.821704
CD2AP	1548.64	1872.34	1.13204
CDC14A	289.867	215.079	0.7472
CDC14B	320.221	98.3906	0.257199
CDC14B	320.221	233.101	0.747244
CDC27	2036.7	2439.17	1.18242
CDC42	31628.4	51229.8	1.64247
CDC42BPB	673.643	900.123	1.18907
CDK13	396.863	434.418	1.06957
CDK13	396.863	68.7798	0.209918
CDK17	1733.25	1515.44	0.914226
CDK19	1153.46	922.764	0.824301
CDK5RAP2	508.727	625.539	1.21996
CDK7	1163.79	1078.28	0.893453
CDK8	376.822	277.947	0.717429
CDKAL1	902.333	927.286	1.0074
CDKAL1	902.333	1186.14	1.3589
CDR2	1043.17	1209.13	1.1072
CDYL	840.569	1056.47	1.27149
CDYL2	276.028	301.239	1.11146
CELF2	4805.04	6341.37	1.30611
CENPK	1918.46	61.8474	0.026687
CENPK	1918.46	1534.32	0.803069
CEP128	113.342	73.494	0.623895
CEP128	113.342	111.922	0.968055
CEP128	113.342	120.728	1.18879
CEP192	125.104	109.251	0.926442
CEP192	125.104	112.948	0.84705
CEP350	269.133	415.205	1.51979
CEP57	1613.81	1043.05	0.63583
CEP57L1	496.58	30368.8	75.3811
CEP70	213.182	124.343	0.587798
CEP70	213.182	73.1444	0.363882
CEP72	122.428	156.802	1.34796
CEP85	647.681	620.244	0.973159
CEP85L	81.3761	105.041	1.27957
CEPT1	1262.99	1525.17	1.20634
CHAF1A	760.246	960.72	1.25832
CHD1	476.296	411.712	0.830154
CHD1	476.296	572.496	1.18924
CHD1L	1909.99	2449.64	1.24118
CHD1L	1909.99	1682.12	0.864212
CHD1L	1909.99	2513.52	1.32662
CHD2	374.885	381.406	1.02848
CHD2	374.885	622.047	1.5827
CHD2	374.885	455.349	1.2625
CHD4	4161.03	4991.34	1.1905
CHD4	4161.03	3126.48	0.74828
CHD6	213.918	203.009	1.07148
CHD6	213.918	370.546	1.6078
CHD6	213.918	76.6118	0.288497
CHD6	213.918	288.392	1.19831
CHD7	121.581	122.351	1.00921
CHD7	121.581	147.632	1.22973
CHD9	272.405	193.707	0.627534
CHD9	272.405	85.9209	0.355094
CHEK2	669.504	768.01	1.07652
CHEK2	669.504	820.821	1.17563
CHFR	1212.7	1004.75	0.796385
CHMP5	5172.12	5479.59	1.06458
CHSY1	627.293	654.57	1.06992
CKAP5	2323.61	2160.87	0.899998
CKAP5	2323.61	2341.22	0.990141
CLASP1	683.417	968.73	1.40276
CLASP1	683.417	457.639	0.66856
CLASP2	562.842	693.022	1.13668
CLCN4	4533.29	4702.41	1.03631
CLEC16A	361.868	359.995	0.998627
CLIP1	433.742	469.489	1.06529
CLIP2	896.329	759.725	0.851403
CLIP2	896.329	855.583	1.01327
CLNS1A	6783.2	249.109	0.0425261
CLNS1A	6783.2	6202.09	0.919731
CLNS1A	6783.2	3032.02	0.404808
CLPX	1291.27	1839.31	1.38626
CLTA	14191.9	23029.2	1.58657
CMPK1	4148.06	4708.16	1.06741
CNOT1	1311.75	1447.29	1.09973
CNOT10	901.729	802.118	0.868767
CNOT2	1617.17	1488.72	0.918286
CNOT6	849.155	579.365	0.697161
CNOT6L	1098.42	1193.67	1.09914
CNOT8	5650.74	4830.88	0.856152
CNPY3	3644.51	3303.89	0.903079
CNST	7736.3	5806.2	0.807094
CNTLN	117.989	300.417	2.57515
CNTLN	117.989	79.9939	0.688549
CNTRL	304.634	333.418	1.02107
CNTRL	304.634	319.148	1.04875
CNTROB	241.373	171.815	0.716826
COA1	3393.53	998.925	0.278059
COCH	238.997	287.325	1.23414
COG3	505.294	382.782	0.77125
COL24A1	314.549	54.5891	0.170289
COL24A1	314.549	306.217	0.90591
COL24A1	314.549	223.404	0.743617
COL24A1	314.549	150.469	0.31913
COL24A1	314.549	160.1	0.645934
COPA	3436.34	4110.94	1.19477
COPB1	4029.07	3587.89	0.917049
CORO1C	27372.3	35266.3	1.30422
CORO1C	27372.3	30580.3	1.17012
CORO1C	27372.3	33151.7	1.19337
CPSF2	2355.85	2252.23	0.966001
CPSF6	2730.86	3242.44	1.17967
CPT1A	3119.86	3482.97	1.12421
CRBN	3041.2	1528.83	0.51913
CRBN	3041.2	2774.29	0.887006
CREB3L2	3094.22	4289.77	1.3695
CREBBP	465.782	934.604	1.99103
CREBBP	465.782	586.255	1.24046
CRKL	8052.48	8275.39	1.0066
CRLF3	4755.2	6501.3	1.26402
CRLF3	4755.2	4392.79	0.933843
CRY2	400.452	435.365	1.11262
CSE1L	1848.08	2159.43	1.16104
CSF2RB	3367.25	6671.07	1.99817
CSGALNACT2	445.263	412.298	0.934119
CSNK1G1	321.242	437.832	1.35748
CSNK1G3	545.322	453.804	0.815301
CSPP1	70.416	73.452	1.34736
CSTF3	799.879	1036.39	1.32913
CTBP1	3765.15	4006.17	1.06051
CTBP2	1087.94	1102.66	1.01491
CTCF	2105.88	1892.99	0.886488
CTCF	2105.88	2803.47	1.32426
CTDP1	406.387	399.495	0.962506
CTDSPL2	1121.64	786.044	0.710004
CTNNA1	4077.29	4542.27	1.10325
CTNNB1	6293.08	6410.39	1.02707
CTPS1	1100.34	873.278	0.693086
CUL3	1938.97	1802.88	0.890027
CUL5	776.924	586.171	0.710497
CUX1	969.941	2142.92	2.18002
CUX1	969.941	377.888	0.389872
CWC27	946.794	1177.51	1.17656
CYP51A1	11295.8	12782.3	1.10731
DAAM1	6114.18	8618.28	1.52442
DAGLB	671.126	516.384	0.752634
DAP3	2737.95	2353.14	0.849247
DCAF12	2208.39	1758.33	0.732285
DCAF6	859.107	1037.75	1.20846
DCBLD2	565.625	253.182	0.506645
DCBLD2	565.625	467.963	0.759408
DCP2	2705.28	3056.99	1.12555
DCTN6	2835.03	3941.67	1.36932
DCUN1D4	894.594	480.225	0.491672
DCUN1D4	894.594	5810.86	7.82381
DDHD2	539.387	519.914	0.956729
DDI2	771.868	806.744	1.04638
DDX17	9142.57	11220.5	1.22414
DDX21	2846.97	3322.45	1.17922
DDX50	538.213	1028.92	1.94207
DDX6	7060.34	5806.67	0.803267
DDX6	7060.34	1732.24	0.231619
DEK	4948.88	5865.65	1.17679
DEK	4948.88	348.954	0.0603252
DENND1A	171.571	338.596	1.84204
DENND3	1334.74	1801.15	1.40935
DENND3	1334.74	681.818	0.531228
DENND4A	815.202	496.329	0.628915
DENND4A	815.202	125.879	0.205006
DENND4A	815.202	255.452	0.274809
DENND4A	815.202	1204.42	1.45945
DENND4A	815.202	89.709	0.0850859
DENND4C	360.385	458.167	1.29453
DGKD	1366.43	2065.1	1.52116
DGKD	1366.43	1619.24	1.12616
DHDDS	1465.24	1340.94	0.903731
DHPS	3100.65	4162.42	1.33021
DHTKD1	617.692	86.9004	0.154919
DHTKD1	617.692	59.9226	0.0962799
DHTKD1	617.692	599.791	0.953222
DHX29	849.1	778.851	0.902896
DHX34	166.478	172.018	1.03068
DHX35	230.949	286.222	1.23283
DIAPH1	13431.8	444.256	0.0242142
DIAPH1	13431.8	17730.8	1.34286
DIAPH3	259.852	190.805	0.702494
DLG1	552.886	615.687	1.07928
DLG1	552.886	56.5635	0.0970682
DMC1	259.949	175.519	0.670208
DMXL1	273.896	257.688	0.942359
DNA2	197.61	76.2361	0.511927
DNA2	197.61	257.656	1.26416
DNAJA1	7038.16	6639.78	0.957433
DNAJB12	1480.62	1832.08	1.23059
DNAJB6	16221.8	20622.2	1.27516
DNAJC1	899.122	1060.68	1.15055
DNAJC16	654.915	798.526	1.19869
DNAJC3	2620.73	2384.41	0.922374
DNAJC5	2240.76	2641.56	1.1765
DNAJC6	1957.44	1798.1	0.925861
DNM1L	7927.1	6935.88	0.906499
DNM1L	7927.1	2308.34	0.299776
DNM1L	7927.1	4905.75	0.557064
DNM3	6002.31	8871.15	1.52344
DNM3	6002.31	231.787	0.0997886
DNM3	6002.31	6452.55	1.12234
DNM3	6002.31	7748.73	1.19139
DNM3	6002.31	4365.44	0.781704
DNMT3B	1812	1841.81	1.03179
DNMT3B	1812	437.456	0.216567
DNTTIP2	1356.86	1352.48	0.982668
DOCK1	313.195	308.068	0.975734
DOCK1	313.195	203.101	0.683881
DOCK11	934.967	1183.21	1.27452
DOCK11	934.967	899.635	0.972424
DOCK11	934.967	1305.56	1.38053
DOCK5	431.507	673.098	1.54436
DOCK8	534.867	606.667	1.14236
DOT1L	352.658	413.479	1.13552
DPP3	1052.9	831.705	0.827836
DPP8	447.488	507.544	1.13413
DPY19L1	1664.76	1964.95	1.20246
DROSHA	450.869	70.4789	0.171754
DROSHA	450.869	361.381	0.779772
DROSHA	450.869	355.067	0.802826
DTL	1177.61	1036.05	0.89991
DYM	790.925	89.5598	0.10305
DYM	790.925	604.753	0.74855
DYNC1H1	364.521	298.753	0.81271
DYNC1H1	364.521	363.878	0.970126
DYRK1A	1782.94	2047.34	1.12387
DYRK1A	1782.94	167.236	0.0865034
EAF2	2349.33	2250.17	1.00407
ECE1	3684.76	2797.13	0.853448
ECSIT	429.34	383.956	0.902672
EDC3	1209.32	1566.73	1.28015
EDEM3	412.42	456.314	1.12037
EEFSEC	926.67	1393.77	1.50602
EFR3A	648.606	366.667	0.595398
EGF	582.69	658.436	1.09576
EHBP1	413.003	499.741	1.18544
EHMT1	690.983	796.9	1.1453
EHMT1	690.983	1010.07	1.44549
EIF2AK1	4461.51	3990.56	0.888758
EIF2S2	3882.85	10501.3	2.81877
EIF3D	4641.76	5067.62	1.08358
EIF3H	5651.51	5894.34	1.00065
EIF4B	4200.66	6684.83	1.58269
EIF4ENIF1	676.546	662.491	1.02544
EIF4G3	1919.07	1115.91	0.605992
EIF4G3	1919.07	2740.63	1.48349
EIF4G3	1919.07	2204.83	1.14417
ELF1	13114.8	1971.49	0.157535
ELF1	13114.8	12590	0.963942
ELF2	1027.94	1031.13	0.990182
ELF2	1027.94	23431.8	23.3958
ELF2	1027.94	52.287	0.0671269
ELK4	462.691	462.734	1.00172
ELMO1	3273.32	2987.54	0.929687
ELMOD3	294.448	196.078	0.634362
ELP3	1276.76	1538.19	1.18076
EMC2	1687.92	2126.46	1.22378
ENGASE	163.307	208.025	1.30613
ENO3	380.893	4713.56	13.2878
EP300	754.536	822.309	1.05681
EPB41	2751.38	5107.01	1.93246
EPS15	3335.17	4008	1.19699
EPS15	3335.17	2357.67	0.707895
EPS15	3335.17	3923.28	1.18242
EPS15	3335.17	708.355	0.195166
ERC1	456.48	336.566	0.740982
ERC1	456.48	275.054	0.591379
ERCC6L2	177.531	104.847	0.557947
ERI3	1411.57	1317.36	0.925532
ERI3	1411.57	1044.87	0.718451
ESCO1	302.718	167.225	0.520847
ESPL1	244.799	306.494	1.17127
ESYT2	1251.08	1113.17	0.880193
ESYT2	1251.08	239.314	0.174958
ESYT2	1251.08	724.034	0.599266
ETFA	13901.7	9911.62	0.68266
ETFA	13901.7	3600.36	0.254461
ETFA	13901.7	1388.29	0.148712
ETFA	13901.7	1260.33	0.0957608
ETFA	13901.7	5697.53	0.4114
ETNK1	2734	3875.16	1.39738
ETV6	3083.26	2912.09	0.937869
EXOC3L2	1651.46	2506.37	1.54337
EXOC5	1570.86	1760.05	1.10098
EXOC6	598.222	465.453	0.777624
EXOC6B	379.562	560.684	1.45462
EXOSC9	1350.16	1445.86	1.08297
EXT2	1711.21	1807.75	1.01958
EXT2	1711.21	524.729	0.346685
EYA3	595.342	625.097	1.04747
EZH2	1347.02	877.061	0.671095
EZH2	1347.02	978.922	0.728782
F13A1	23287.3	24951.7	0.97314
FAF1	1550.98	1526.97	0.986406
FAM114A2	1021.3	905.293	0.873304
FAM114A2	1021.3	100.762	0.13189
FAM114A2	1021.3	136.789	0.0956496
FAM114A2	1021.3	406.572	0.436216
FAM120A	1281.3	1220.79	0.947685
FAM120A	1281.3	221.812	0.159109
FAM120A	1281.3	1895.03	1.46935
FAM126A	1119.12	217.57	0.282447
FAM126A	1119.12	962.914	0.799687
FAM13B	343.826	490.092	1.44463
FAM13B	343.826	290.995	0.829916
FAM13B	343.826	119.029	0.337364
FAM13B	343.826	139.48	0.394196
FAM160B1	1023.57	947.653	0.920585
FAM185A	136.742	77.9454	0.509305
FAM192A	4541.71	5500.3	1.18996
FAM193A	235.709	259.382	1.12331
FAM193A	235.709	344.839	1.40189
FAM193A	235.709	342.882	1.44604
FAM210A	717.702	730.872	1.01853
FAM216A	684.681	868.979	1.25238
FAM228B	791.727	113.924	0.159313
FAM53B	383.11	198.139	0.541384
FAM53B	383.11	291.667	0.749201
FAM53B	383.11	228.039	0.568113
FANCB	124.806	77.6758	0.708219
FANCL	929.367	661.595	0.699198
FANCL	929.367	421.169	0.489114
FAR2	2652.49	2800.56	1.06969
FARSA	3166.57	6283.53	1.95689
FASTKD1	329.981	243.948	0.701307
FBXL17	605.147	725.748	1.16928
FBXL17	605.147	922.185	1.52149
FBXL3	1903.84	1575.05	0.830706
FBXO11	902.361	561.952	0.6062
FBXO30	528.374	579.512	1.10133
FBXO7	4218.51	293.331	0.0984513
FBXO7	4218.51	1129.33	0.302039
FBXO7	4218.51	4388.08	1.00887
FBXW4	140.052	90.1518	0.489497
FBXW4	140.052	148.537	1.16488
FBXW7	136.902	519.94	3.50569
FCHO2	253.485	289.801	1.12814
FCHSD2	298.257	504.193	1.70315
FDFT1	19916.4	22774.4	1.12545
FER	483.782	334.547	0.737788
FER	483.782	373.289	0.73739
FGD3	1026.32	826.617	0.799375
FGFR1OP	274.799	232.295	0.755048
FGGY	101.72	64.3991	0.586058
FIP1L1	3461.63	2687.56	0.831641
FIP1L1	3461.63	3357.8	0.934079
FKBP5	1996.02	1815.94	0.890736
FKBP8	9605.48	1603.05	0.13792
FKBP8	9605.48	12516.1	1.37174
FKBP8	9605.48	8257.29	0.887712
FLI1	13285	3565.19	0.274664
FLI1	13285	8093.13	0.576605
FLI1	13285	8272.45	0.642871
FLI1	13285	82.8783	0.0066032
FLVCR1	275.315	283.8	0.9795
FNBP4	565.567	659.465	1.15777
FNDC3A	500.364	415.515	0.830792
FNDC3B	297.857	281.369	0.948087
FNIP1	2005.44	2481.74	1.23636
FNIP1	2005.44	687.87	0.317981
FNIP1	2005.44	1137.61	0.589777
FNIP2	182.783	281.562	1.53668
FOCAD	274.068	226.126	0.819147
FOCAD	274.068	102.016	0.370266
FOCAD	274.068	253.615	0.93411
FOXJ3	866.818	711.161	0.812949
FOXK2	594.512	810.884	1.37622
FOXN2	4587.19	339.812	0.0915049
FOXN2	4587.19	3623.9	0.774355
FOXO3	1217.21	2203.72	1.82224
FRYL	150.517	292.079	1.9347
FTO	1528.63	1492.25	0.966156
FUT8	3196	3166.03	1.0274
FUT8	3196	4127.72	1.58049
FUT8	3196	50.5131	0.0078744
FUT8	3196	1696.37	0.511428
FUT8	3196	2603.38	0.814546
FUT8	3196	563.749	0.161378
FXR1	2208.91	4514.4	2.05685
G3BP1	7305.79	9250.65	1.25992
G3BP2	11055.4	10706.4	0.934756
GAB3	1771.44	1933.1	1.10633
GAB3	1771.44	1806.94	1.00419
GABPB1	1649.51	2100.43	1.25862
GABPB2	411.437	307.859	0.753141
GALK2	921.079	829.738	0.885266
GALNT7	489.024	654.375	1.33432
GANAB	8213.29	8376.71	1.02477
GAPVD1	1022.78	886.986	0.842724
GAPVD1	1022.78	924.276	0.906386
GARS	9626.13	9982.28	1.02958
GARS	9626.13	9982.28	1.02958
GATAD2A	2845.33	2801.89	0.978871
GCLM	4607.42	2694.3	0.60192
GCLM	4607.42	2946.32	0.613397
GDAP2	645.017	740.209	1.13529
GDI2	9630.84	8804.79	0.898902
GDI2	9630.84	2849.05	0.296117
GFM2	638.52	468.974	0.718629
GFPT1	2558.44	1559.7	0.606251
GFPT1	2558.44	2775.03	1.061
GINS1	1551.58	1632.62	1.017
GK	972.562	1467.82	1.44032
GLB1	3903.8	4278.3	1.13011
GLCE	488.475	598.071	1.19501
GLG1	2697.28	2633.12	0.974457
GLS	3085.64	3891.14	1.22714
GMEB1	731.275	1019.37	1.35434
GMIP	286.36	423.077	1.50827
GMPS	3236.78	2799.91	0.848484
GMPS	3236.78	2571.61	0.784048
GNAI2	24593.9	21131.4	0.864459
GNAQ	4720.71	6441.57	1.31006
GNAZ	3305.76	3603.85	1.31434
GNB1	19055.6	14927.7	0.798739
GNB1	19055.6	3994.16	0.185037
GNB4	4938.2	5880.32	1.16456
GOLGA1	388.238	219.786	0.553282
GOLGA1	388.238	691.441	1.56886
GOLGA4	294.435	211.482	0.517485
GOLGA4	294.435	98.339	0.296646
GOLGA4	294.435	152.013	0.749048
GOLIM4	1153.52	1475.21	1.24765
GOLPH3	3480.12	3581.65	0.989057
GON4L	328.619	425.612	1.33216
GOSR1	2063.77	2049.13	0.963099
GPATCH1	165.589	134.32	0.819351
GPATCH2L	1974.04	139.351	0.0776382
GPATCH2L	1974.04	2187.97	1.07267
GPBP1	1606.05	326.724	0.178827
GPBP1	1606.05	1341	0.822836
GPBP1	1606.05	802.686	0.530575
GPBP1L1	1578.13	654.182	0.426391
GPN3	1187.56	1362.43	1.15262
GPR89A	884.801	972.032	1.10184
GRAMD4	361.255	297.691	0.809141
GRB10	2706.16	141.807	0.0746509
GRB10	2706.16	864.842	0.339529
GRB10	2706.16	284.834	0.0838534
GRB10	2706.16	376.1	0.14745
GRB10	2706.16	1091.63	0.422741
GRHPR	3895	3918.48	1.00341
GSAP	947.252	872.286	0.872425
GSAP	947.252	602.667	0.574739
GSAP	947.252	700.025	0.74877
GSE1	1470.52	640.03	0.471234
GSK3B	2853	2634.3	0.924982
GSPT1	4743.43	3644.26	0.765509
GTDC1	1101.09	1391.09	1.31285
GTDC1	1101.09	803.764	0.690395
GTDC1	1101.09	97.316	0.0775034
GTF2E1	1835.03	2312.76	1.23016
GTF2F2	2028.16	1924.38	0.944914
GTF2I	1617.01	6539.68	4.0619
GTF2I	1617.01	3125.12	1.92112
GTF2IRD2	193.471	1896.4	11.905
GTF3C2	643.592	10420.2	18.3191
GUSB	1793.73	2931.78	1.64684
GUSBP1	NA	746.863	0
HABP4	221.298	292.887	1.19239
HACD1	1384.54	1531.71	1.03708
HACE1	201.273	189.904	0.964027
HADHB	4015.2	5123.12	1.26248
HAT1	3407.89	3248.9	0.921242
HAUS1	3434.78	3353.63	0.940523
HAUS6	472.038	474.337	0.986284
HBS1L	1900.65	2099.69	1.10574
HDAC5	1702.5	1526.92	0.89701
HDAC9	271.889	472.88	1.71759
HDGFL3	1239.02	1153.58	0.882063
HECTD1	746.015	157.492	0.191175
HECTD1	746.015	664.324	0.899393
HECTD4	192.56	329.697	1.6285
HELZ	664.213	715.054	1.14408
HERC1	310.215	282.746	0.928501
HERC1	310.215	682.357	2.22015
HERC1	310.215	122.323	0.347093
HERC2	517.102	545.541	1.10614
HERC2	517.102	476.19	0.985887
HERC2	517.102	503.861	0.940516
HERC2	517.102	602.392	1.14552
HERC2P2	NA	80.3013	0
HERC2P3	NA	1118.86	0
HERC4	508.878	13912.7	32.2174
HERPUD2	1411.11	1648.41	1.15386
HGD	4161.81	7683.39	1.78414
HIBADH	962.413	1091.18	1.11704
HINFP	501.441	383.242	0.752518
HIPK2	1709.8	1416.51	0.79155
HIPK3	764.803	641.644	0.837904
HK1	5922	5146.15	0.835373
HMG20A	2344.2	2363.32	1.00724
HMGCL	2295.59	2322.1	0.996629
HMGCL	2295.59	142.624	0.0697727
HMGCS1	21983.5	1580.26	0.0738558
HMGCS1	21983.5	1577.74	0.0339002
HMGCS1	21983.5	23031.4	1.03781
HNRNPC	41520	49353.7	1.19439
HNRNPLL	2573.85	3846.41	1.44823
HNRNPM	7107.84	12391.3	1.66831
HNRNPM	7107.84	7043.12	0.981977
HOOK3	1643.22	1981.05	1.16515
HOOK3	1643.22	1360.13	0.838565
HP1BP3	6025.52	921.114	0.17612
HP1BP3	6025.52	246.895	0.0320276
HP1BP3	6025.52	5667.03	0.931579
HPCAL1	10243.9	9725.54	0.961699
HPRT1	4025.37	3991.6	0.967173
HPRT1	4025.37	732.292	0.220685
HPS4	1403.3	928.375	0.644712
HPS5	238.994	200.203	0.843351
HPSE	14645.3	18426.4	1.10822
HSPA4	3792.38	4420.29	1.16781
HSPA4	3792.38	4360.91	1.10559
HSPA9	9552	9936.48	1.03266
HTT	281.492	434.917	1.49049
HUWE1	613.227	924.242	1.50816
HUWE1	613.227	586.156	0.934752
IARS	3772.96	919.157	0.245638
IARS	3772.96	3712.9	0.978422
IBTK	437.923	374.24	0.824515
IBTK	437.923	415.301	0.902934
ICA1	1002.83	448.502	0.35683
ICA1	1002.83	708.79	0.757541
IGF1R	394.04	764.347	1.92857
IGF2BP1	949.301	958.816	0.97929
IGF2BP3	1287.31	1325.44	1.00004
IGF2R	218.285	258.047	1.18025
IKBKB	632.619	606.545	0.944505
IKZF1	965.774	1235.63	1.28567
IL27RA	706.842	893.987	1.22312
ILF2	9760.69	11575	1.1722
ILKAP	1355.8	1603.81	1.19074
ING5	2353.54	2719.85	1.07684
INPP4B	1294.4	1083.84	0.85926
INPP4B	1294.4	1372.2	1.04503
INPP4B	1294.4	137.794	0.108043
INPP4B	1294.4	99.6658	0.063269
INPP4B	1294.4	472.16	0.385004
INPP5A	1424.81	529.778	0.332733
INPP5A	1424.81	1297.52	0.947779
INPP5B	1970.74	1068.73	0.493336
INPP5B	1970.74	1588.52	0.830764
INSIG1	28375.7	30525.1	1.06547
INTS2	351.441	411.985	1.13488
INTS6L	217.464	199.464	0.897618
IPO11	285.433	379.663	1.40603
IPO7	2133.65	2255.66	1.04173
IPO7	2133.65	2304.6	1.10582
IPO7	2133.65	2214.83	1.03362
IQGAP1	396.026	764.291	1.91374
IRAK3	694.795	809.019	1.14485
ISOC1	2890.56	3936.13	1.35164
ITCH	1196.48	1185.29	0.980032
ITFG2	304.019	286.285	0.935007
ITGB3	16920.8	74160.7	4.31716
JAK2	667.523	713.845	1.09819
KALRN	1573.42	8865.16	5.38081
KANSL1	507.798	534.287	1.00805
KANSL1	507.798	652.032	1.30272
KANSL1L	148.325	74.671	0.520747
KANSL1L	148.325	207.224	1.3933
KAT6A	540.337	438.505	0.81541
KATNA1	832.43	856.857	1.02335
KATNAL1	288.187	288.518	1.01692
KATNAL1	288.187	127.688	0.294695
KDM1A	1916.7	2314.44	1.17393
KDM1B	231.411	387.984	1.69846
KDM4B	744.404	503.086	0.672841
KDM4B	744.404	685.594	0.939037
KDM4B	744.404	688.837	0.947097
KDM4C	417.638	474.978	1.18441
KDM5A	710.679	1010.22	1.3898
KDM5B	977.293	1053.76	1.09683
KDM8	163.248	196.667	1.24074
KIAA0319L	435.889	351.23	0.795348
KIAA1841	108.785	90.3756	1.03003
KIAA2026	66.6996	148.141	2.16858
KIF20B	342.852	382.792	1.13443
KIF2A	7039	7304.52	1.00521
KIF2C	1965.87	2396.09	1.22755
KIF4A	564.994	574.553	1.05661
KLHDC1	290.532	253.188	0.836742
KLHDC1	290.532	99.0572	0.373315
KLHDC10	717.911	802.083	1.09226
KLHDC4	571.117	538.084	0.933944
KLHL2	241.005	262.227	1.08527
KLHL24	1752.41	1582.85	0.912168
KLHL5	1615.84	1991.55	1.27358
KLHL8	729.512	233.487	0.337351
KLHL8	729.512	578.975	0.769483
KMT2C	431.16	521.151	1.23596
KMT2C	431.16	619.634	1.41154
KMT2C	431.16	495.315	0.998045
KMT2C	431.16	477.907	1.11253
KMT2C	431.16	1347.11	3.2489
KMT2E	512.918	352.844	0.669825
KMT2E	512.918	115.353	0.191357
KMT2E	512.918	1200.77	2.3785
KMT5B	645.512	759.484	1.18496
KNTC1	227.639	345.466	1.53385
KPNA5	365.365	105.206	0.39745
KPNA5	365.365	248.857	0.710657
KPNB1	7085.06	4546.98	0.701368
KPNB1	7085.06	4235.02	0.547902
KRIT1	465.157	397.45	0.847137
KTN1	1050.45	1285.33	1.19997
LAPTM4B	19305.7	27061.2	1.38896
LARP1B	246.011	616.344	2.14875
LARP1B	246.011	457	1.95098
LARP4	1438.45	1304	0.863337
LARP4	1438.45	1623.03	1.12436
LARP4	1438.45	79.0934	0.102707
LARP4B	1390.17	2236.32	1.61652
LAT2	8371.34	9710.44	1.15514
LCA5	646.45	545.988	0.866129
LCLAT1	857.456	1055.25	1.1918
LCOR	461.71	387.055	0.841586
LCORL	142.925	977.053	6.82195
LDLR	4503.57	5910.42	1.33978
LDLR	4503.57	4143.5	0.910712
LDLR	4503.57	5267.7	1.14418
LDLRAD3	1255.24	1868.98	1.48139
LDLRAD4	1730.2	80.7578	0.0337144
LDLRAD4	1730.2	756.634	0.375227
LDLRAD4	1730.2	406.764	0.246709
LEPROTL1	8921.82	8946.13	1.01368
LIMK2	903.01	875.096	0.982887
LIMS1	43024.6	49183.3	1.20514
LIN54	940.404	1018.03	1.08215
LIN54	940.404	574.53	0.621431
LMBR1	743.383	870.224	1.17714
LMBR1	743.383	690.981	0.916254
LMBR1L	273.36	116.567	0.404578
LMF1	419.992	523.934	1.22614
LONP2	810.63	976.835	1.16959
LPGAT1	718.942	700.487	0.924208
LPIN1	1081.66	1356.9	1.246
LPIN2	849.922	1322.48	1.54391
LRBA	1115.69	415.752	0.482424
LRBA	1115.69	417.043	0.293208
LRBA	1115.69	1270.48	1.17301
LRBA	1115.69	855.484	0.820993
LRBA	1115.69	1135.29	1.0218
LRBA	1115.69	1085.68	0.999844
LRCH1	462.042	662.577	1.45753
LRCH3	670.008	651.675	0.949584
LRCH3	670.008	723.577	1.08195
LRMP	675.449	785.933	1.17383
LRP6	111.523	163.706	1.45533
LRPPRC	1495.46	1556.81	1.0414
LRPPRC	1495.46	1987.06	1.32213
LRRFIP2	3651.27	5434.63	1.50348
LRRFIP2	3651.27	5572.84	1.56366
LRWD1	359.836	538.826	1.37551
LSM14A	4332.68	4774.49	1.13698
LTBP1	17332.4	17312	1.00822
LTBP1	17332.4	23131.5	1.33178
LTBP1	17332.4	3871.5	0.277173
LTBP1	17332.4	12493.8	0.773171
LTBP1	17332.4	3438.44	0.149875
LTBP1	17332.4	11372.4	0.537278
LTBP1	17332.4	3734.75	0.177288
LTBP1	17332.4	623.325	0.0297595
LTBP1	17332.4	10988.7	0.697384
LTBP1	17332.4	9648.97	0.71011
LUC7L3	4711.09	2712.03	0.635103
LYN	7915.58	4454.15	0.534536
LYN	7915.58	5876.57	0.764942
LYST	91.4398	671.28	7.49178
LZIC	5872.12	1686.71	0.283049
LZIC	5872.12	2250.48	0.357967
MACF1	462.671	344.262	0.750937
MAD1L1	705.803	815.987	1.15339
MAD1L1	705.803	103.568	0.148803
MAD1L1	705.803	557.522	0.800378
MAML3	499.442	1659.38	3.69129
MAN1A2	707.497	350.973	0.380486
MAN1A2	707.497	335.817	0.523069
MAN1A2	707.497	109.532	0.160344
MAN1A2	707.497	111.967	0.146084
MAN2A1	1942.52	1417.12	0.691758
MAN2A1	1942.52	927.401	0.52841
MAN2A1	1942.52	197.254	0.105444
MAN2A1	1942.52	96.5388	0.0412202
MANBA	367.804	353.159	0.97691
MAP2K1	1614.18	1985.1	1.19866
MAP2K4	801.714	987.101	1.20334
MAP3K1	362.361	521.413	1.46349
MAP3K4	177.163	237.621	1.2919
MAP3K5	1623.55	495.126	0.241408
MAP3K5	1623.55	1082.28	0.650826
MAP3K5	1623.55	570.905	0.469054
MAP3K5	1623.55	1429.45	0.907709
MAPK1	6395.6	7227.21	1.10384
MAPK8	586.531	584.02	0.986395
MAPK9	772.625	987.229	1.21506
MAPK9	772.625	698.338	0.91386
MAPKAP1	1090.25	931.217	0.807465
MAPKAPK3	4816.54	3702.92	0.771033
MAPRE2	18334.2	20743.5	1.14359
2006-03-01	3083.08	4382.23	1.44814
MARK4	255.289	357.605	1.34235
MAST4	710.616	509.558	0.711127
MASTL	312.554	363.695	1.19715
MATR3	5772.48	5460.54	0.96976
MBNL1	10313.6	8693.78	0.830865
MBOAT2	1264.25	1179.85	1.00469
MBOAT2	1264.25	234.849	0.164082
MBP	4556.87	4258.72	0.950179
MBTD1	1019.78	1173.22	1.14504
MCCC1	762.457	937.037	1.21191
MCCC2	1138.41	1677.44	1.44487
MCFD2	6936.99	6975.13	1.05308
MCM10	665.026	519.204	0.751546
MCM6	3764.4	3797.5	1.00687
MCTP1	1309.61	1037.37	0.619315
MCTP1	1309.61	492.427	0.636472
MCTP1	1309.61	507.611	0.427199
MCTP2	598.702	487.03	0.792443
MCTP2	598.702	194.512	0.301408
MCTP2	598.702	850.303	1.317
MCTP2	598.702	131.554	0.235267
MCTP2	598.702	567.771	0.987958
MCU	3741.84	123.431	0.0318204
MDM2	1752.7	1489.02	0.814879
MDM4	1080.22	7023.77	6.64726
MDN1	111.151	147.43	1.32412
ME1	1089.2	1406.1	1.24062
ME2	2401.06	2348.79	0.942423
ME3	170.615	200.704	1.1303
MED12L	1534.17	1747.02	1.10332
MED12L	1534.17	218.199	0.160067
MED12L	1534.17	1699.04	1.0396
MED12L	1534.17	1241.06	0.821323
MED12L	1534.17	1236.4	0.869208
MED13	496.305	603.116	1.19321
MED13	496.305	517.23	1.05924
MED13L	269.636	278.254	1.01497
MEF2C	15211.5	9362.97	0.606465
MEGF8	80.667	88.3148	1.10799
MEIS1	8786.36	9982.39	1.03779
MEIS1	8786.36	2442.11	0.434737
MEMO1	1026.14	1066.32	0.980699
MEMO1	1026.14	1150.52	1.08891
METTL25	89.0728	117.253	1.33535
METTL3	1304.3	1354.47	1.01739
METTL6	716.92	442.358	0.604198
METTL8	428.899	373.713	0.841516
MFN2	1841.32	2234.5	1.2012
MFNG	6266.36	4941.8	0.78471
MFSD8	266.883	234.212	0.862006
MGA	232.022	207.896	0.861006
MGA	232.022	71.237	0.339314
MGA	232.022	56.0909	0.281718
MGA	232.022	75.8191	0.313583
MGAT5	334.533	297.173	0.900207
MGLL	4845.16	4890.53	1.00024
MIB1	646.751	190.763	0.296763
MIB1	646.751	705.494	1.10461
MICU1	8333.07	12584.7	1.53534
MIER1	634.077	5791.89	7.94239
MINDY3	629.92	313.95	0.350028
MINDY3	629.92	337.359	0.518099
MITD1	1867.7	1888.89	0.963342
MKLN1	776.886	60.9819	0.0714194
MKLN1	776.886	742.217	0.965002
MKRN2	1521.05	1903.37	1.20834
MLH3	129.699	129.175	1.00486
MLLT1	1146.56	1335.38	1.11679
MLYCD	433.933	687.698	1.5766
MMRN1	18642.1	14717	0.83204
MMRN1	18642.1	17903.1	0.92366
MNAT1	1178.67	1052.95	0.874293
MND1	631.257	814.912	1.3874
MOB1B	11342	6790.99	0.645645
MOB3A	6298.82	5256.39	0.834401
MPHOSPH9	330.889	287.619	0.899412
MPP1	22432.2	24937.8	1.11854
MPP6	186.029	185.966	1.0099
MPP7	2541.36	3288.85	1.16761
MRE11	876.196	968.75	1.12888
MRPL2	1802.14	1944.32	1.07855
MRPL47	2649.18	2456.37	0.864791
MRPL47	2649.18	1148.4	0.459997
MRPS35	2558.3	2984.96	1.1566
MRS2	948.798	692.44	0.74324
MSANTD3	713.943	917.96	1.33503
MSANTD3-TMEFF1	66.0304	108.516	NA
MSH3	168.688	186.153	1.11917
MTDH	5732.25	6051.47	1.06257
MTDH	5732.25	10703.7	1.80294
MTDH	5732.25	409.993	0.0374935
MTHFD2L	940.799	285.647	0.273387
MTHFD2L	940.799	1054.06	1.3622
MTHFD2L	940.799	323.93	0.343872
MTMR3	562.701	685.374	1.25716
MTO1	541.909	2208.07	4.19791
MTR	1050.53	1389.32	1.32664
MTRF1	220.919	253.428	1.14149
MTSS1	5145.92	4557.54	0.876849
MYCBP2	320.171	129.269	0.396748
MYCBP2	320.171	318.82	0.977989
MYCBP2	320.171	198.333	0.623588
MYH9	23511.1	27403.4	1.19142
MYLK	3665.42	8130.41	2.15146
MYO9B	793.379	1028.03	1.28591
N4BP1	398.737	443.377	1.10581
N4BP2L2	937.971	1485.16	1.58799
N4BP2L2	937.971	1100.21	1.1828
NAA15	1053.7	844.867	0.769675
NAA16	222.039	253.905	1.10762
NAA25	338.056	509.476	1.46159
NAA35	628.727	770.115	1.20933
NAB1	329.172	345.378	1.05993
NAE1	1684.44	928.69	0.525549
NAP1L4	4901.75	5074.73	1.03751
NAP1L4	4901.75	1318.83	0.255725
NASP	4062.12	5667.25	1.36431
NBAS	820.475	934.384	1.15308
NBAS	820.475	200.321	0.2274
NBAS	820.475	758.27	0.922044
NBAS	820.475	789.637	0.980619
NBAS	820.475	215.67	0.251833
NBAS	820.475	90.7948	0.0958543
NBAS	820.475	501.16	0.587005
NBAS	820.475	99.8454	0.133323
NBAS	820.475	342.315	0.418692
NCAPD2	1647.24	1922.1	1.15135
NCAPG	1128.36	1292.93	1.18528
NCOA1	415.54	353.851	0.855775
NCOA2	492.491	530.576	0.958914
NCOA2	492.491	559.361	1.09701
NCOA4	11166.9	13983.7	1.22949
NCOA6	260.898	326.797	1.28012
NCOR1	1061.55	1259.89	1.12761
NCOR2	597.267	612.845	1.03175
NCOR2	597.267	1174.74	1.92312
NCOR2	597.267	53.4207	0.0900572
NDST3	65.1529	96.0219	1.53882
NDUFA10	2873.98	528.109	0.148416
NDUFA10	2873.98	3870.88	1.35859
NDUFB2	14817.5	11547.5	0.766751
NDUFS1	3575.11	3381.17	0.952795
NDUFS4	8466.22	9822.54	1.17615
NDUFV2	10071	9968.44	0.988775
NEIL3	272.465	158.286	0.596545
NEIL3	272.465	130.081	0.455589
NEK4	157.904	216.783	1.38343
NEK6	15704.2	16425.1	1.09688
NEK6	15704.2	5021.89	0.246637
NEK7	2536.12	2570.81	0.979344
NEK7	2536.12	1384.58	0.591111
NEK9	1413.13	1696.72	1.21029
NEMF	633.399	580.36	0.906781
NF1	202.332	238.593	1.15113
NF2	871.95	818.318	0.938803
NFAT5	323.606	200.82	0.633331
NFATC1	612.759	998.46	1.59955
NFATC3	792.606	212.351	0.266842
NFATC3	792.606	683.987	0.8416
NFX1	1142.45	489.607	0.413321
NHLRC2	2004.41	1991.29	0.964273
NIPBL	451.273	554.532	1.24571
NLK	2046.69	1901.06	0.958873
NLK	2046.69	214.07	0.149977
NMNAT1	1336.48	1031.65	0.730878
NMRAL1	2036.83	1961.49	0.956632
NMT1	3249.28	4613.79	1.41642
NNT	2000.07	1466.25	0.731711
NOL10	617.154	739.078	1.19362
NOL12	1493.29	1503.91	0.963137
NOLC1	2524.81	2917.86	1.13335
NOP14	1146.14	1564.72	1.35053
NOP58	1988.81	1903.55	0.943622
NPAT	636.703	491.888	0.736316
NPEPPS	1689.92	1679.76	0.990676
NPEPPS	1689.92	2049.87	1.18308
NPLOC4	2950.32	2918.96	0.970144
NPM1	47341.7	74192.5	1.49597
NRIP1	2510.21	2465.52	0.952937
NSUN2	1498.5	1345.97	0.882079
NT5C3A	6196.41	543.347	0.0757849
NT5C3A	6196.41	7413.74	1.18358
NUCB1	9120.18	8178.1	0.890409
NUDC	5940.8	5230.72	0.840151
NUDC	5940.8	6591.98	1.13477
NUFIP2	1553.87	1779.9	1.13443
NUP107	992.313	1280.89	1.30772
NUP153	1120.37	1164.83	1.03128
NUP155	701.855	641.487	0.970555
NUP205	563.425	661.637	1.18318
NUP35	971.065	1345.6	1.33186
NUP43	3382.48	2988.43	0.865542
NUP50	2426.34	2083.96	0.858928
NUP54	1289.16	142.809	0.112063
NUP54	1289.16	1298.36	1.01132
NUP54	1289.16	1173.64	0.903167
NUP98	992.421	1125	1.12305
NUSAP1	4249.03	4033.23	0.936683
OFD1	669.956	513.384	0.766878
OGDH	1741.37	1981.66	1.14113
OGDH	1741.37	1432.2	0.794172
OGG1	738.703	874.611	1.16217
OMA1	263.062	188.888	0.65533
OMA1	263.062	120.418	0.504539
OPHN1	544.745	526.239	0.963338
ORC2	645.267	517.401	0.79724
ORC4	1309.1	1283.69	0.970323
ORC4	1309.1	79.577	0.0614967
OTUD4	209.496	224.093	1.06009
OXCT1	1863.62	1839.15	0.987995
OXNAD1	499.161	350.721	0.692794
OXR1	702.191	696.175	0.973829
P2RX1	14836.1	13423.2	0.851152
P4HB	19069.1	22704	1.15004
PACSIN2	6558.11	4956.92	0.692129
PAFAH1B2	5807.77	6348.09	1.08781
PAIP2	17607.8	15346.9	0.875126
PAK2	4240.36	5170.69	1.18328
PAK2	4240.36	387.775	0.0948003
PAN3	712.463	447.979	0.588003
PAN3	712.463	1055.15	1.4906
PAN3	712.463	808.817	1.11229
PAN3	712.463	648.995	0.943894
PANK2	995.985	1536.57	1.52198
PANK3	3089.45	330.948	0.0782555
PANK3	3089.45	2735.82	0.859496
PAPSS1	2677.57	3058.98	1.14051
PAPSS1	2677.57	128.374	0.0512896
PAPSS1	2677.57	2510.75	0.913452
PARD3	278.378	190.207	0.57096
PARG	296.405	311.184	1.04622
PASK	135.14	137.297	1.03402
PATL1	688.287	1343.92	1.93972
PCCA	402.771	425.234	1.04639
PCM1	827.178	725.42	0.885625
PCM1	827.178	641.65	0.733493
PCMT1	8705.1	12756.7	1.44054
PCMTD1	1166.4	1072.55	0.990689
PCNT	151.7	134.081	0.845284
PCSK6	2859.84	2361.71	0.81734
PCSK6	2859.84	2621.32	0.970555
PCSK6	2859.84	3238.24	1.05912
PCSK6	2859.84	1633.38	0.785612
PCSK6	2859.84	1038.6	0.212872
PDAP1	7826.16	6980	0.824954
PDCD10	10987.7	7329.57	0.69572
PDCD11	295.219	248.747	0.825847
PDE3A	1834.4	133.746	0.0637265
PDE3A	1834.4	2301.96	1.302
PDE5A	1883.18	2559.89	1.40352
PDHX	1048.23	1023.98	0.999414
PDIA3	27785.1	6169.46	0.151244
PDIA3	27785.1	9081.28	0.359176
PDIA3	27785.1	16017.9	0.488021
PDIA3	27785.1	29387.9	1.07593
PDIA3	27785.1	26998.6	1.03431
PDIA4	3873.44	7006.25	1.85119
PDIA6	16023.2	20934.4	1.29149
PDK1	2725.33	2521.86	0.902493
PDK1	2725.33	3044.13	1.15046
PDLIM5	3372.79	4899.91	1.42455
PDPK1	840.722	763.747	0.910307
PDS5A	1103.2	904.762	0.820808
PDS5A	1103.2	1210.17	1.12557
PDS5A	1103.2	1097.39	0.979353
PDS5B	790.138	1048.95	1.28858
PEX6	184.959	356.183	1.86732
PFKFB4	539.864	699.288	1.29053
PFKP	7169.57	8432.92	1.18262
PGAP3	786.085	731.076	0.945216
PGS1	701.44	796.664	1.12706
PHACTR1	581.924	1099.21	1.74913
PHC3	459.496	483.481	1.03027
PHC3	459.496	452.847	0.994938
PHF12	461.899	525.227	1.15076
PHF14	835.761	1194.73	1.44548
PHF20	536.694	459.977	0.854907
PHF21A	465.117	339.35	0.729816
PHF3	639.651	608.9	0.941774
PHF3	639.651	740.103	1.16769
PHIP	455.958	1047.85	2.28572
PHKB	1729.37	1696.3	0.958465
PHKB	1729.37	552.995	0.390997
PHKB	1729.37	57.0003	0.0218157
PHKB	1729.37	549.906	0.282648
PI4KB	665.728	678.94	1.01221
PIAS1	1708.07	62.9387	0.0583736
PIAS1	1708.07	745.665	0.448447
PIAS1	1708.07	1132.13	0.660847
PIAS2	324.967	239.441	0.711685
PIBF1	179.053	235.318	1.29162
PICALM	3674.92	354.461	0.128238
PICALM	3674.92	715.559	0.227185
PICALM	3674.92	631.949	0.161248
PICALM	3674.92	3017.56	0.833225
PICALM	3674.92	2293.38	0.61077
PIGN	1622.35	696.919	0.411713
PIK3C3	910.162	322.703	0.363772
PIK3C3	910.162	744.178	0.778367
PIK3C3	910.162	622.93	0.696935
PIK3CB	3672.56	3789.84	0.94207
PIK3CB	3672.56	3955.6	1.08044
PIK3CB	3672.56	320.639	0.152863
PIK3CB	3672.56	2871.69	0.810057
PIK3CB	3672.56	355.084	0.114411
PIK3R1	1024.34	1020.83	0.999886
PIKFYVE	499.02	445.245	0.840502
PIP4K2A	8340.26	9314.01	1.03204
PIP4K2A	8340.26	1668.67	0.309523
PIP5K1C	593.927	1247.66	2.18065
PITPNB	3353.45	2765.27	0.828371
PITPNB	3353.45	1168.18	0.378323
PITPNC1	3066.56	2672.43	0.881181
PKHD1L1	389.609	292.617	0.800321
PKHD1L1	389.609	366.849	1.04276
PKN1	1628	1612.2	0.968683
PKN2	267.745	81.7216	0.343742
PKN2	267.745	288.999	1.04854
PLA2G4A	699.111	894.658	1.27926
PLCG2	3325.73	1330.9	0.431813
PLCG2	3325.73	934.149	0.308732
PLEK	205116	246057	1.18876
PLEKHM1	232.202	125.516	0.536538
PLEKHM1	232.202	146.862	0.656457
PLEKHM2	441	516.092	1.15249
PLEKHM3	104.521	88.4972	0.878041
PLOD2	637.227	672.489	1.00977
PLPBP	2475.73	2539.39	1.02137
PLXDC2	9353.16	7099.42	0.770609
PLXNC1	106.898	144.562	1.50335
PMS1	183.014	225.536	1.16119
PNN	1770.27	1724.86	0.949761
POLD1	781.939	831.23	1.09489
POLE2	739.809	456.435	0.630862
POLE2	739.809	428.263	0.574236
POLE2	739.809	317.019	0.353305
POLI	204.953	127.666	0.611267
POLI	204.953	130.212	0.632201
POLK	562.323	700.249	1.19126
POLQ	59.3402	70.0104	1.26826
POLR2A	1496.68	2009.42	1.37637
POM121	542.439	3563.59	6.69563
PPA2	5089.8	1659.34	0.39644
PPA2	5089.8	2133.78	0.354319
PPA2	5089.8	3533.55	0.727124
PPFIA1	479.365	493.238	1.08004
PPHLN1	2949.08	2605.84	0.940826
PPHLN1	2949.08	2397.43	0.715851
PPHLN1	2949.08	153.185	0.0483486
PPIA	112555	168502	1.49435
PPM1B	1790.42	1730.8	0.944852
PPM1B	1790.42	1803.88	0.999002
PPM1D	653.954	755.342	1.17361
PPM1D	653.954	509.839	0.765151
PPP1CB	5924.67	14540.2	2.70291
PPP1R12A	2629.21	2691.41	0.999328
PPP1R12A	2629.21	83.1615	0.0271495
PPP1R12C	360.082	364.474	0.979986
PPP2R3B	296.305	376.163	1.26248
PPP2R5A	1790.09	1773.13	1.02239
PPP4R3A	1000.84	1190.14	1.1749
PPP6R1	2720.22	3851.66	1.38511
PPP6R2	639.325	807.041	1.2642
PPP6R3	2788.13	1915.92	0.672094
PPP6R3	2788.13	900.948	0.296205
PPP6R3	2788.13	1222.88	0.437837
PPP6R3	2788.13	1808.45	0.625686
PRDM2	287.989	61.421	0.219076
PRELID2	1987.16	2159.36	1.07113
PRIMPOL	208.949	183.797	0.877841
PRKAA1	2666.67	2698.07	0.997921
PRKACB	8602.62	9491.17	1.11092
PRKAR1B	884.526	762.626	0.895415
PRKCB	4385.9	3662.28	0.999207
PRKCB	4385.9	238.951	0.0274954
PRKCQ	3392.89	3944.39	1.17946
PRKD3	471.794	307.883	0.661183
PRMT5	1196.36	1322.87	1.10605
PROSER2	2139.14	2228.31	1.1439
PRPSAP1	1238.99	1370.8	1.09677
PRPSAP2	2470.75	2291.5	0.930715
PRR14L	394.065	651.895	1.63841
PRRC2B	408.195	882.576	2.15562
PRRC2B	408.195	975.575	2.39156
PRRC2C	901.81	784.64	0.863418
PRRG1	325.274	236.524	0.686305
PRUNE1	2481.85	3059.61	1.19707
PSEN1	1691.19	1158.07	0.685457
PSEN1	1691.19	976.794	0.573149
PSMA7	17564.5	22625.3	1.26627
PSMB5	5980.6	6671.01	1.11437
PSMD14	4794.21	5487.09	1.11837
PSME3	5568.76	5546	0.949199
PSPC1	2251.73	2650.03	1.18223
PSTPIP2	24521.1	18051.9	0.671433
PSTPIP2	24521.1	11093.5	0.44123
PSTPIP2	24521.1	23172.1	0.971284
PTBP3	4778.7	3656.79	0.764543
PTDSS1	2592.51	2827.35	1.08788
PTER	1116.6	1055.85	0.939644
PTGES3	13799.3	20100.6	1.44199
PTGR1	869.756	663.433	0.776889
PTK2	1178.53	155.317	0.176644
PTK2	1178.53	983.2	0.794254
PTK2	1178.53	1128.62	0.902155
PTK2	1178.53	1207.75	1.06137
PTK2	1178.53	207.254	0.252905
PTK2	1178.53	291.861	0.254481
PTP4A2	14967.3	4979.33	0.333224
PTPN12	3890.36	1217.65	0.22323
PTPN12	3890.36	2992.5	0.638641
PTPN12	3890.36	1840.34	0.550855
PTPN12	3890.36	92.473	0.025714
PTPN22	325.353	114.565	0.324946
PTPN22	325.353	343.332	1.05324
PTPN22	325.353	434.457	1.36351
PTPN7	3480.34	3652.42	1.01057
PTPRA	1782.94	1522.03	0.867405
PTPRA	1782.94	134.467	0.0754396
PTPRA	1782.94	1665.54	0.901368
PTTG1IP	19928.2	19642.8	1.01334
PUM1	1456.06	111.589	0.0743427
PUM1	1456.06	1701.27	1.15514
PUM2	1727.89	1439.8	0.832652
PUM2	1727.89	568.108	0.321964
PUS7	431.691	349.118	0.751948
PWWP2A	524.794	752.677	1.41898
QKI	5517.83	5005.75	0.837737
QKI	5517.83	846.837	0.185614
QSER1	135.605	157.384	1.17
R3HCC1L	237.106	48397.7	235.757
R3HDM1	362.827	330.076	0.893047
R3HDM1	362.827	606.746	1.71953
R3HDM1	362.827	391.043	1.03617
RAB21	6050.78	4417.29	0.7044
RAB23	267.04	222.77	0.873366
RAB27B	58157.5	63828.2	1.14819
RAB2A	6110.33	6692.37	1.0722
RAB3GAP2	729.233	809.295	1.06717
RAB3IP	356.224	433.333	1.23748
RAB3IP	356.224	284.435	0.745138
RAB6A	10657.7	5214.37	0.488664
RAB6A	10657.7	4883.1	0.436409
RAB7A	29496.2	34733.5	1.16463
RAB7A	29496.2	2990.18	0.0959875
RABEP1	989.507	869.048	0.914052
RABGAP1	995.625	949.12	0.988942
RABGEF1	1343.28	1348.55	1.02324
RACGAP1	2205.68	1540.44	0.696688
RAD18	638.217	666.667	1.05012
RAD23B	11525.2	11200.4	0.953826
RAD23B	11525.2	940.383	0.10719
RALB	9834.67	6084.41	0.583946
RALB	9834.67	4965.83	0.536715
RALBP1	1402.09	1165.53	0.80306
RALGAPA1	109.007	172.972	1.57013
RALY	10839.9	10359.5	0.960242
RANBP9	2493.82	3086.05	1.25282
RANBP9	2493.82	531.869	0.172011
RAP1B	159210	166131	0.976564
RAP1B	159210	74224.3	0.540502
RAPGEF6	258.831	311.766	1.17435
RARS	1705.59	259.21	0.221989
RARS	1705.59	1462.6	0.789806
RASA1	1473.76	1697.7	1.09294
RASA3	4657.35	6465.49	1.44811
RASAL2	471.112	2840.82	8.29004
RASAL2	471.112	489.542	1.01805
RASGRP3	2496.87	1948.84	0.779606
RBBP8	276.186	253.854	0.981311
RBL1	488.948	517.83	1.05033
RBL2	516.952	512.594	0.952309
RBM14-RBM4	1828.42	10237.4	5.86139
RBM23	2044.62	1404	0.65608
RBM23	2044.62	1966.69	0.955265
RBM27	180.759	719.209	4.64232
RBM33	461.302	673.664	1.4177
RBM33	461.302	66.9236	0.136732
RBM34	1127.09	774.543	0.737049
RBM39	6156.31	4013.07	0.704287
RBM39	6156.31	152.868	0.0231155
RBM39	6156.31	1258.75	0.15397
RBM39	6156.31	10156.6	1.52206
RBM41	480.965	344.059	0.705426
RBM5	2095.23	1607.2	0.76975
RBM5	2095.23	1188.28	0.591846
RBM5	2095.23	1036.88	0.538916
RBM5	2095.23	579.694	0.267945
RBM5	2095.23	1529.16	0.780992
RBM6	670.314	734.997	1.04325
RBM6	670.314	588.951	0.909188
RBX1	28721.3	28093.9	0.986684
RC3H1	225.193	238.408	1.10838
RCL1	1597.23	1173.37	0.686098
RDH11	15087.5	18040.8	1.16107
RDX	1407.48	1294.7	0.941877
RDX	1407.48	2215.82	1.54698
RELL1	355.392	422.043	1.20056
REPS1	575.986	751.894	1.27902
RERE	356.421	393.94	1.08486
RERE	356.421	813.788	2.21381
REV1	236.067	336.906	1.38089
REXO4	703.312	770.71	1.14684
RFC1	719.129	598.071	0.798823
RGS10	45547.3	40223.3	0.89854
RHBDD1	1361.3	971.524	0.721519
RHBDD1	1361.3	699.457	0.453266
RHBDD1	1361.3	138.008	0.103709
RHEB	7303.99	3649.43	0.532858
RHOBTB3	244.092	331.594	1.3477
RHOF	8096.25	8233.33	0.990466
RHOT1	845.657	1143.84	1.37971
RICTOR	338.522	72.4154	0.227038
RICTOR	338.522	526.892	1.55017
RIN3	1344.64	1451.01	1.01098
RIPK1	1469.34	1247.85	0.826673
RIPK1	1469.34	456.715	0.374348
RIT1	8450.25	5233.71	0.617101
RLF	200.696	273.251	1.35627
RMDN3	884.407	711.14	0.794906
RMND5A	1845.11	2148.2	1.17221
RNASEH2B	1810.85	2072.42	1.07918
RNF10	1000.12	1001.55	0.983018
RNF111	426.071	492.028	1.12613
RNF13	1780.66	614.629	0.371627
RNF13	1780.66	1262.39	0.695789
RNF138	1820.17	151.264	0.0993777
RNF138	1820.17	2105.31	1.12312
RNF169	314.919	405.392	1.25624
RNF170	620.839	490.888	0.825101
RNF19B	205.624	396.961	2.01063
RNF216	826.606	1465.73	1.71164
RNF220	965.753	139.937	0.144507
RNF24	8674.24	4351.97	0.512818
RNF4	6137.38	3821.79	0.61185
RPA1	3715.42	115.414	0.0366537
RPA1	3715.42	3189.79	0.847463
RPAP2	785.975	126.551	0.193965
RPAP2	785.975	194.988	0.307274
RPRD1A	980.405	891.85	0.893083
RPRD1B	1203.7	1465.95	1.20181
RPRD2	586.424	776.441	1.28542
RPS5	25400.9	24343.2	0.963369
RPS6KA5	785.554	446.389	0.534252
RPS6KA5	785.554	79.988	0.112172
RPS6KC1	360.825	489.426	1.34314
RPS6KC1	360.825	424.952	1.1402
RPTOR	296.091	264.354	0.911078
RREB1	676.027	633.834	0.912005
RREB1	676.027	199.624	0.322738
RSF1	788.01	705.391	0.88019
RSF1	788.01	764.632	0.973821
RSF1	788.01	369.337	0.523577
RSL1D1	3829.31	2155.76	0.540521
RSL1D1	3829.31	1673.66	0.444407
RSRC1	1878.22	2824.65	1.49731
RSU1	30094.6	32372.3	1.07
RSU1	30094.6	4411.25	0.119682
RTN4	7021.51	37669.1	5.21239
RUFY1	9330.36	3405.09	0.558138
RUFY1	9330.36	923.707	0.250031
RUFY1	9330.36	5930.77	0.772096
RUFY1	9330.36	11163.3	0.931833
RUNX1	4803.3	2922.92	0.599097
RUNX1	4803.3	3574.08	0.748738
RUSC2	98.8794	126.306	1.25878
RYK	165.179	165.608	1.00759
SAFB	2289.07	3743.15	1.60501
SAFB2	1068.37	1791.51	1.64939
SAMD8	70.3515	386.453	15.6662
SARNP	6941.37	7630.11	1.06713
SART3	1714.89	2603.92	1.52415
SATB1	552.831	454.885	0.82074
SATB1	552.831	66.0721	0.146327
SAV1	1214.27	1012.05	0.796832
SBDS	8176.2	1112.17	0.0978911
SBDS	8176.2	8162.04	1.04075
SBNO1	772.417	833.333	1.08307
SCAF11	1273.37	1465.05	1.15583
SCAF8	661.518	356.217	0.553959
SCAF8	661.518	418.584	0.627402
SCAP	630.686	801.486	1.2776
SCARF1	1279.63	2811.65	2.20451
SCFD1	1626.85	2090.01	1.254
SCFD1	1626.85	1865.34	1.15169
SCLT1	492.095	111.741	0.24295
SCLT1	492.095	296.229	0.570066
SCLT1	492.095	157.184	0.282914
SCLT1	492.095	695.964	1.38034
SCMH1	85.9743	68.9815	0.823492
SCYL2	1992.46	1543.64	0.761174
SDCCAG8	345.194	182.023	0.50359
SDF4	4333.49	5829.35	1.32554
SEC11A	7420.5	7500.88	0.994596
SEC22A	479.914	614.911	1.25338
SEC31A	2084.89	2178.75	1.04332
SEC31A	2084.89	226.594	0.109757
SEC31A	2084.89	2689.35	1.26642
SEC62	5432.49	3864.33	0.71553
SEC63	2185.91	2420.82	1.01149
SEC63	2185.91	1637.01	0.717109
SEC63	2185.91	2495.05	1.16444
SEL1L3	1016.61	1394.63	1.34266
SEL1L3	1016.61	1293.22	1.26925
SEMA4B	709.643	958.333	1.31595
SENP1	716.35	755.523	1.08001
SENP2	743.688	597.079	0.809251
SENP2	743.688	805.057	1.04742
SENP5	551.71	469.236	0.837816
SENP6	992.699	833.478	0.834795
SENP6	992.699	112.944	0.101252
SENP6	992.699	672.034	0.687453
SENP6	992.699	70.1077	0.0727028
SENP6	992.699	384.36	0.38652
SENP6	992.699	1445.72	1.31191
SEPSECS	513.011	527.453	1.03622
SERGEF	273.905	324.45	1.16583
SERPINE2	13462	16009.5	1.20636
SESTD1	1214.68	1804.99	1.46311
SETD2	348.905	423.656	1.20186
SETD2	348.905	270.751	0.743302
SETD2	348.905	382.161	1.08379
SETD3	1517.08	1847.49	1.16548
SETDB2	224.692	111.197	0.49164
SF3B3	3082.89	2284.94	0.740455
SF3B3	3082.89	3011.86	0.94731
SFI1	177.968	168.582	0.925338
SFMBT1	123.895	84.0456	0.704497
SGMS1	1598.5	142.31	0.0700548
SGMS1	1598.5	547.882	0.326921
SH2B3	1334.69	680.281	0.47592
SH3RF1	118.11	122.312	1.00075
SHKBP1	2040.37	2119.51	1.03838
SHOC2	1480.52	1427.44	0.960795
SHPRH	288.793	221.591	0.767351
SIL1	1807.43	2845.14	1.56425
SIRT5	521.829	220.065	0.409797
SKA3	561.071	404.646	0.654786
SKA3	561.071	251.36	0.461682
SKAP2	4304.86	5298.61	1.13377
SLAIN1	281.35	418.993	1.45647
SLAIN2	2544.27	3153.79	1.25262
SLC15A4	424.74	722.41	1.70393
SLC20A2	602.178	474.28	0.770836
SLC22A23	606.395	792.149	1.29924
SLC24A3	2119.55	2791.67	1.39426
SLC25A13	563.844	952.623	1.82431
SLC25A16	436.26	328.979	0.738268
SLC25A26	333.671	201.587	0.622357
SLC25A48	158.345	420.732	2.71673
SLC30A5	3829.12	4242.79	1.06412
SLC30A5	3829.12	4369.71	1.16275
SLC30A6	1242	1475.95	1.14773
SLC30A9	1351.05	1270.34	0.908322
SLC33A1	1477.45	1390.36	0.936469
SLC38A1	4924.88	111.822	0.0227235
SLC38A1	4924.88	3117.26	0.629813
SLC39A8	2322.87	2127.48	0.902991
SLC39A9	2865.44	1191.74	0.430631
SLC43A1	478.373	534.679	1.15026
SLC45A4	290.894	383.775	1.25656
SLC4A7	216.226	414.038	1.8348
SLC4A7	216.226	184.506	0.947832
SLC6A6	1993.91	2210.65	1.09322
SLC7A6	519.629	587.694	1.12755
SLC8A3	260.718	318.346	1.22365
SLC9A9	3073.7	2859.4	0.859756
SLFN11	1106.82	1411.27	1.30732
SLMAP	1049.12	1475.95	1.41453
SLMAP	1049.12	1169.15	1.09022
SLTM	1463.45	1596.92	1.04008
SLTM	1463.45	143.048	0.112801
SLX4IP	345.759	376.777	1.09736
SMAD2	3727.96	1144.33	0.27815
SMAD2	3727.96	3416.61	0.926176
SMAD5	986.521	1249.1	1.24675
SMARCA2	1657.47	2007.74	1.24132
SMARCA5	3125.79	1929.99	0.608565
SMARCC1	1565.63	1675.85	1.0725
SMARCC1	1565.63	1341.03	0.872199
SMARCC1	1565.63	902.976	0.553465
SMC1A	1978.24	2419.64	1.22328
SMC3	1942.61	1677.6	0.856443
SMG1	148.869	135	0.914517
SMO	66.9957	67.6295	0.980247
SMYD3	1165.54	1229.37	1.04656
SMYD3	1165.54	1606.97	1.42476
SND1	4018.96	4190.17	1.04783
SNRK	1363.2	1259.58	0.946808
SNRNP48	813.155	1056.29	1.29279
SNX11	1293.4	1148.15	0.855376
SNX13	287.717	258.586	0.862903
SNX14	1083.51	1453.61	1.32368
SNX14	1083.51	838.328	0.733662
SNX29P2	NA	362.667	0
SNX5	3371.23	3869.21	1.14533
SNX5	3371.23	684.546	0.209346
SNX6	3143.42	2162.74	0.673943
SNX6	3143.42	2093.31	0.646578
SOD2	25641.9	23849.2	0.92686
SOS1	2455.31	2328.19	0.938764
SOS1	2455.31	3057.36	1.20869
SOS2	312.953	438.714	1.42413
SP100	858.173	1358.35	1.57272
SP3	1303.83	1456.5	1.11451
SPAST	1422.65	1142.08	0.873295
SPAST	1422.65	103.974	0.0615031
SPCS2	2994.55	14422.8	4.85311
SPECC1	668.452	508.73	0.839572
SPECC1	668.452	834.705	1.20301
SPECC1L	523.103	596.415	1.16798
SPECC1L	523.103	927.564	1.72226
SPG11	305.565	191.786	0.623665
SPI1	2328.02	2281.99	0.96791
SPIDR	225.777	105.47	0.494746
SPIDR	225.777	214.898	0.926867
SPIDR	225.777	542.344	2.39491
SPPL3	1380.21	1552.88	1.09412
SQLE	12547.4	13909.7	1.17811
SRBD1	429.243	510.857	1.21649
SRBD1	429.243	380.738	0.827502
SRBD1	429.243	70.3082	0.17875
SRCAP	254.816	165.956	0.663803
SRCAP	254.816	530.423	2.09008
SRSF4	4004.1	4789.92	1.19857
SSH2	303.108	289.233	0.983069
SSX2IP	2513.6	2464.59	0.917588
ST3GAL3	327.6	252.834	0.714744
ST8SIA6	2607.37	6080.98	2.38649
STAG1	624.217	463.518	0.734633
STAG1	624.217	274.244	0.426936
STAG1	624.217	460.202	0.727771
STAM	2136.17	2584.74	1.17579
STAM2	1124.11	1135.2	1.03606
STARD3NL	4840.68	4588.17	0.938737
STAU2	1537.89	1841.57	1.2335
STAU2	1537.89	503.401	0.332275
STIL	445.476	509.686	1.16565
STIL	445.476	349.604	0.765707
STK24	7572.74	7039.61	0.959222
STK3	830.976	1290.92	1.62252
STK3	830.976	1149.51	1.35046
STK38	1802.34	471.282	0.256051
STK38	1802.34	819.973	0.445117
STK39	887.73	152.808	0.17391
STK39	887.73	942.042	1.06166
STK39	887.73	967.865	1.04706
STK4	4151.63	3661.25	0.871853
STK40	2178.76	1587.92	0.716181
STOM	109090	105561	0.965519
STON2	3190.73	2765.63	0.882434
STRN3	922.416	1044.11	1.13289
STRN3	922.416	316.434	0.304827
STT3B	3149.88	3598.66	1.15994
STX6	1484.07	1604.67	1.08956
STXBP5	4233.65	4892.34	1.13354
STXBP5	4233.65	3025.55	0.701531
STXBP5	4233.65	4246.89	1.06703
STXBP5	4233.65	1869.29	0.419129
STXBP5	4233.65	1015.45	0.198636
STXBP5	4233.65	1166.07	0.31861
SUCLG2	838.229	1002.07	1.2043
SUCO	205.113	228.086	1.18756
SUMF1	410.352	634.866	1.51559
SUN2	2102.76	36960.6	17.6635
SUPT16H	2656.7	2901.38	1.09336
SUPT20H	759.513	923.077	1.23182
SUSD1	3360.3	3280.09	0.959128
SUSD1	3360.3	2892.5	0.827211
SUSD1	3360.3	5761.11	1.64575
SUV39H2	450.818	509.177	1.07788
SUZ12	1190.92	948.402	0.803264
SUZ12	1190.92	2055.75	1.7333
SUZ12P1	NA	1187.41	0
SYPL1	6478.6	6782.28	1.04254
TAF2	425.681	383.775	0.917289
TAF4	177.155	278.429	1.57279
TAOK1	1609.76	1745.02	1.01519
TAOK3	2170.87	2448.66	1.11422
TAOK3	2170.87	1387.5	0.604404
TARS2	653.217	583.077	0.876989
TARSL2	472.573	907.383	1.93366
TAX1BP1	1978.23	1947.22	0.914377
TBC1D1	163.393	194.609	1.0905
TBC1D12	68.6163	84.0278	1.20716
TBC1D14	941.242	1049.49	1.11801
TBC1D14	941.242	174.085	0.140307
TBC1D14	941.242	855.944	0.907527
TBC1D31	185.148	290.076	1.67943
TBC1D31	185.148	104.202	0.58283
TBC1D31	185.148	53.6217	0.290612
TBC1D5	886.336	852.127	0.955912
TBCD	890.649	136.585	0.155148
TBCD	890.649	818.719	0.914099
TBCD	890.649	1096.08	1.21658
TBCD	890.649	311.393	0.316932
TBCEL	450.457	484.695	1.0856
TBPL1	5265.93	5238.41	0.990115
TCEA1	7833.49	9373.5	1.4222
TCEA1	7833.49	1312.45	0.300534
TCF20	294.291	332.968	1.13425
TCF25	2094.4	1790.24	0.889473
TDRD3	239.509	187.434	0.705686
TDRD3	239.509	157.366	0.709965
TEP1	170.488	240	1.36436
TEP1	170.488	214.994	1.2371
TERF2	1290.71	1957.26	1.49717
TET2	635.728	668.307	1.05124
TEX2	729.105	779.798	1.10105
TEX2	729.105	862.077	1.18339
TGFB1	39714.9	21124.6	0.560101
THUMPD2	1210.05	1333.55	1.08677
TICRR	159.719	212.628	1.33806
TIMM23B	613.36	4677.7	7.22664
TIMMDC1	2285.94	101.234	0.03688
TIMMDC1	2285.94	1828.45	0.789327
TIMMDC1	2285.94	212.204	0.108559
TIPARP	1070.42	1257.58	1.18046
TLK1	2888.56	2861.8	0.958244
TLK1	2888.56	1435.08	0.538204
TM7SF3	1847.6	2302.7	1.28334
TM9SF1	742.455	3958.26	5.13734
TM9SF3	5180.61	1126.42	0.164834
TM9SF3	5180.61	4829.82	0.938301
TMCC1	136.82	1680.15	12.5802
TMCC1	136.82	260.292	1.92756
TMCC2	244.366	440.82	1.79582
TMED2	18793.9	14944.1	0.758963
TMEM135	1390.87	1190.85	0.80149
TMEM138	1294.76	993.952	0.781618
TMEM164	6444.44	6332.8	0.999862
TMEM165	4028.91	5212.82	1.28664
TMEM181	598.565	918.733	1.54942
TMEM184B	1029.11	1006.01	0.980784
TMEM245	612.208	757.125	1.22062
TMEM245	612.208	740.152	1.18045
TMEM59	8044.69	9125	1.14953
TMEM87A	1284.87	1818.28	1.37212
TMEM91	1278.97	1034.87	0.906444
TMPO	4737.48	5819.01	1.20608
TMTC3	188.452	190.446	1.01096
TNFRSF11A	413.734	571.314	1.35478
TNIK	1797.1	2436.22	1.29717
TNIK	1797.1	208.928	0.172982
TNK2	177.745	405.678	2.26165
TNPO2	1232.9	1553.69	1.26185
TNPO3	822.408	879.63	1.05902
TNRC6C	177.502	177.278	0.97363
TOLLIP	3934.95	4646.16	1.17279
TOP1	6798.23	7335.01	1.0981
TOP2A	2778.02	2723.32	0.97093
TP53BP2	922.94	696.751	0.759822
TPM3	63197.2	98423.3	1.43105
TPM4	84314.1	136254	1.52037
TPP2	1487.26	1793.77	1.1804
TPST2	10128.7	10114.3	0.986252
TPX2	3212.83	2932.94	0.898703
TRA2B	13599.9	16168.9	1.14403
TRA2B	13599.9	410.639	0.0394631
TRAPPC10	365.62	312.798	0.885244
TRAPPC9	589.905	605.556	0.991968
TRIM24	2177.03	1420.69	0.666194
TRIM24	2177.03	1434.57	0.653356
TRIM33	992.376	952.561	0.959601
TRIM35	1005.17	1443	1.304
TRIM37	307.547	368.056	1.19318
TRIM58	3758.54	6040.65	1.59927
TRIP11	340.136	444.126	1.31593
TRIP12	1706.05	1963.26	1.14062
TRIP12	1706.05	1700.74	0.997891
TRMT2B	546.383	547.546	0.98657
TRNT1	1010.65	690.215	0.682677
TRNT1	1010.65	366.286	0.360535
TRPC1	77.526	52.8986	0.631673
TRPC6	1933.64	1890.11	0.993353
TRPM7	323.974	934.486	2.89156
TRPM7	323.974	222.395	0.707611
TRPS1	162.253	154.201	0.92719
TRRAP	308.003	299.15	0.966379
TSN	5523.31	4426.17	0.792448
TSNAX	5592.58	5776.42	1.03935
TSPAN15	4897.93	52.0089	0.00697498
TSPAN15	4897.93	5053.64	0.980944
TTC13	129.436	233.471	1.76698
TTC27	4086.89	5090.15	1.19063
TTC27	4086.89	4080.59	1.00424
TTC3	267.127	77.4303	0.241393
TTC3	267.127	257.791	0.982735
TTC39C	165.301	177.018	1.07475
TTC7A	117.662	130.904	1.09061
TTC7B	2537.48	1063.37	0.365338
TTC7B	2537.48	733.458	0.273654
TTC7B	2537.48	2574.33	0.978645
TTC7B	2537.48	1569.49	0.515462
TTC7B	2537.48	333.669	0.17702
TUBGCP3	963.195	1188.64	1.22237
TUBGCP4	2038.85	1091.3	0.511499
TUBGCP4	2038.85	561.099	0.264598
TUBGCP4	2038.85	1370.21	0.63067
TVP23C-CDRT4	466.299	4245.78	9.67115
TXK	66.858	169.072	2.42339
TXNDC16	248.386	72.0585	0.284333
TXNDC16	248.386	212.96	0.876147
TXNL4B	1429.67	1442.89	0.989236
TYW1	397.822	564.225	1.46304
U2AF1	1486.73	18418	25.6252
UBA2	3693.86	2751.37	0.764393
UBA2	3693.86	2065.22	0.53866
UBA2	3693.86	420.609	0.111947
UBA2	3693.86	324.979	0.103786
UBA2	3693.86	1332.4	0.354545
UBAC2	2358.63	2041.43	0.856034
UBAP2	592.147	233.41	0.422235
UBAP2	592.147	371.869	0.639562
UBAP2	592.147	297.815	0.490076
UBAP2	592.147	630.988	1.09985
UBAP2	592.147	67.875	0.0958309
UBAP2	592.147	278.052	0.464822
UBAP2	592.147	859.58	1.50845
UBAP2	592.147	102.196	0.17897
UBAP2	592.147	252.403	0.38163
UBAP2L	5779.07	2316.92	0.536976
UBAP2L	5779.07	3523.27	0.614927
UBASH3B	6660.16	9949.52	1.44488
UBE2C	31573.7	41152.8	1.29308
UBE2D2	8202.27	10626.9	1.29256
UBE2D2	8202.27	6615.5	0.765636
UBE2G1	4858.73	4207.67	0.842356
UBE2J2	2228.92	1553.03	0.683688
UBE2K	7738.81	3044.56	0.38445
UBE2K	7738.81	5446.73	0.724654
UBE2Q2	517.306	829.043	1.62071
UBE2Q2	517.306	340.297	0.492182
UBE2Q2P1	NA	255.008	0
UBE3A	408.02	324.484	0.995297
UBE3C	890.661	868.551	0.980428
UBE3D	126.74	53.9933	0.363921
UBE3D	126.74	84.1935	0.698514
UBN2	187.391	143.229	0.772399
UBQLN1	5647.3	4696.1	0.815041
UBQLN1	5647.3	2980.76	0.561991
UBQLN1	5647.3	1963.08	0.303512
UBR1	1062.96	1404.76	1.32582
UBR1	1062.96	1169.55	1.13176
UBR2	572.728	670.236	1.20099
UBR2	572.728	766.839	1.3004
UBR3	531.145	497.679	0.889462
UBR5	502.36	581.276	1.18192
UBR5	502.36	591.393	1.17507
UBXN2A	1238.56	58150.9	58.7459
UBXN2A	1238.56	676.879	0.53252
UBXN4	4226.16	4711.86	1.12465
UBXN7	1349.73	84.5999	0.0671048
UBXN7	1349.73	1442.46	1.04831
UCHL3	3047.38	3615.87	1.18488
UGGT1	1352.66	1727.86	1.30061
UGGT1	1352.66	1353.64	0.986435
UGGT2	125.986	176.79	1.3692
UGGT2	125.986	159.153	1.2334
UGP2	2522.81	2966.1	1.21106
UHRF1	1043.2	1070.32	0.994011
UHRF2	406.71	420.91	1.01221
UIMC1	740.561	179.503	0.182519
UIMC1	740.561	2113.89	2.69722
UIMC1	740.561	555.47	0.806808
UPF2	932.318	819.742	0.867583
URI1	798.559	194.436	0.213576
URI1	798.559	534.119	0.679233
USO1	1329.4	1582.65	1.22123
USP1	1409.17	1671.3	1.16822
USP1	1409.17	1286.82	0.910222
USP10	1363.05	1501.21	1.09192
USP13	118.73	149.533	1.37356
USP14	3330.86	3778.85	1.17439
USP25	262.124	330.426	1.29935
USP25	262.124	477.578	1.83561
USP3	596.92	492.953	0.797641
USP30	356.331	374.306	1.06979
USP32	543.384	667.462	1.23883
USP33	1318.9	1351.09	0.946758
USP33	1318.9	1572.16	1.21646
USP34	266.922	338.314	1.23065
USP4	1443.02	1199	0.912299
USP48	1171.03	727.42	0.630981
USP48	1171.03	810.014	0.689998
USP7	1460.03	1587.52	1.06017
USP8	717.972	967.871	1.26362
UTP18	1456.91	2610.3	1.65736
UTRN	147.155	145.287	0.974774
UTRN	147.155	121.703	0.825694
UTRN	147.155	106.643	0.683219
UXS1	2558.29	2221.2	0.862491
UXS1	2558.29	105.123	0.0341428
VAMP3	7453.95	8813.7	1.16582
VAPA	11529.4	13281.2	1.14636
VAPA	11529.4	4498.15	0.387324
VAPB	3149.76	3442.2	1.08955
VASP	18958.3	24150.9	1.35393
VASP	18958.3	4138.32	0.189574
VASP	18958.3	7968.56	0.399775
VAV3	848.605	1820.61	2.13741
VCL	17849.9	19767.4	1.05681
VCL	17849.9	1779.45	0.196713
VDAC3	12233.4	12669.7	1.0296
VMP1	1868.06	146.679	0.0720515
VMP1	1868.06	1787.33	0.959798
VPS13A	188.339	254.248	1.35863
VPS13A	188.339	380.291	1.98803
VPS13A	188.339	258.606	1.40299
VPS13B	118.973	238.943	1.97681
VPS13C	372.524	124.179	0.344838
VPS13C	372.524	496.943	1.32961
VPS13C	372.524	588.834	1.58173
VPS13D	81.9784	88.2264	1.0598
VPS35	1720.27	1799.62	1.00571
VPS36	1090.17	1297.52	1.21914
VPS37A	1272.29	1158.65	0.906287
VPS37A	1272.29	167.24	0.130378
VPS8	468.731	630.763	1.34071
VRK1	2712.37	2774.31	1.00333
VRK2	1087.56	1023.34	0.921134
VTA1	3726.93	3229.58	0.850222
VWA5A	3369.83	5152.9	1.52809
VWA8	159.027	218.357	1.40499
WDHD1	448.377	499.863	1.08551
WDPCP	141.388	61.9803	0.435288
WDR1	21671.8	24014.7	1.08704
WDR20	438.53	85.9355	0.185977
WDR20	438.53	445.728	1.02039
WDR37	640.983	930.303	1.44885
WDR43	1525.2	2296.34	1.51354
WDR44	1604.31	2074.58	1.3198
WDR44	1604.31	1823.17	1.00234
WDR60	113.038	220.729	1.84204
WDR7	418.423	320.246	0.748514
WDR7	418.423	419.927	0.971834
WNK1	1062.69	1648.55	1.50923
WSB1	2111.98	1848.89	0.864915
WWC3	370.75	437.576	1.23421
XPNPEP3	591.058	651.552	1.06938
XPO1	2875.38	2151.55	0.753091
XPO1	2875.38	3006.2	1.02523
[truncated: 92 more rows]

## Sheet: riboCLR Plt
Gene.name	CDS.Length	lin_reads_per_k	ID	circ_reads_per_k	Length.circ	average_ribo-CLR >0
ABCC4	3978	206.216	chr13:95695935-95705438	130.043	369	0.630617
ABCC4	3978	206.216	chr13:95714957-95900007	69.7744	3151	0.338356
ABCC4	3978	206.216	chr13:95686858-95696692	278.391	414	1.35
ABCC4	3978	206.216	chr13:95886863-95918518	109.693	610	0.531935
ABCC4	3978	206.216	chr13:95813442-95816772	265.803	421	1.28895
ABCC4	3978	206.216	chr13:95886863-95900007	551.431	457	2.67405
ABCC4	3978	206.216	chr13:95813442-95822882	77.632	587	0.37646
ABCC4	3978	206.216	chr13:95768175-95822882	99.2864	667	0.481468
ABCC4	3978	206.216	chr13:95822785-95830345	82.9749	279	0.402369
ABHD17B	882	61.2245	chr9:74489529-74489999	104.255	470	1.70284
ABHD18	1395	70.9677	chr4:128904093-128932855	58.4687	431	0.823877
ABHD18	1395	70.9677	chr4:128938517-128950008	52.2254	710	0.735903
ABHD2	1278	93.6972	chr15:89656955-89659752	306.588	102	3.27212
ABHD2	1278	93.6972	chr15:89656955-89698765	151.752	644	1.6196
ABI1	1527	629.916	chr10:27065993-27112234	828.986	345	1.31603
ABI1	1527	629.916	chr10:27054146-27060018	579.712	358	0.920301
ABI1	1527	629.916	chr10:27047990-27059274	126.621	517	0.201012
ABI2	1542	109.956	chr2:204244930-204291992	62.2257	1174	0.565915
ABLIM3	2052	237.33	chr5:148586570-148612863	63.6364	440	0.268135
ACADM	1365	155.311	chr1:76205664-76215244	85.2021	381	0.548589
ACADM	1365	155.311	chr1:76198328-76200556	291.34	350	1.87584
ACADM	1365	155.311	chr1:76200475-76205795	160.66	212	1.03444
ACAP2	2337	133.591	chr3:195053756-195066046	58.4557	384	0.437574
ACAP2	2337	133.591	chr3:195063199-195066046	302.37	243	2.26341
ACAP2	2337	133.591	chr3:195101737-195112876	650.862	232	4.87207
ACER3	804	212.715	chr11:76670022-76709865	76.3322	283	0.358847
ACER3	804	212.715	chr11:76687332-76709865	123.296	230	0.579628
ACER3	804	212.715	chr11:76696686-76709865	367.452	177	1.72744
ACSL4	2136	77.7154	chrX:108917630-108926895	89.6552	1305	1.15364
ACTN1	2793	467.307	chr14:69369193-69387842	577.491	542	1.23578
ACTR2	1200	452.752	chr2:65473657-65492309	117.746	855	0.260067
ACTR2	1200	452.752	chr2:65473657-65478233	392.135	289	0.866113
ACTR3	1257	929.94	chr2:114697535-114713283	138.754	621	0.149207
ACTR3	1257	929.94	chr2:114670748-114691963	421.089	496	0.452813
ACTR3	1257	929.94	chr2:114697535-114709422	571.626	537	0.614691
ACTR3	1257	929.94	chr2:114670748-114699936	458.244	814	0.492768
ACTR3B	1257	130.73	chr7:152480271-152498816	704.277	292	5.38725
ACTR3B	1257	130.73	chr7:152508781-152522207	161.64	652	1.23644
ACVR2A	1542	944.877	chr2:148653869-148657467	3312.9	473	3.50617
ACYP2	519	145.644	chr2:54278094-54284497	348.837	215	2.39514
ADAM10	2247	124.53	chr15:58919898-58925558	108.276	348	0.869476
ADAM10	2247	124.53	chr15:58913669-58936177	108.807	776	0.873739
ADAM10	2247	124.53	chr15:58913669-58920082	119.063	335	0.956096
ADAM32	2364	74.8393	chr8:38994175-39009067	100.42	264	1.34182
ADAM32	2364	74.8393	chr8:38994175-39018484	168.079	456	2.24587
ADAMTS6	3354	78.712	chr5:64747301-64769779	193.787	1352	2.46198
ADD3	2121	285.589	chr10:111883774-111890244	242.784	589	0.850118
ADD3	2121	285.589	chr10:111860382-111872673	793.388	363	2.77808
ADIPOR2	1161	55.9862	chr12:1863423-1882127	111.524	269	1.99199
AEBP2	1554	101.183	chr12:19626181-19646920	120	295	1.18597
AEBP2	1554	101.183	chr12:19626181-19653155	197.052	420	1.94749
AEBP2	1554	101.183	chr12:19615443-19626289	148.222	316	1.46489
AFTPH	2811	59.0548	chr2:64796225-64800202	121.814	307	2.06273
AFTPH	2811	59.0548	chr2:64800079-64812679	359.075	308	6.08037
AGTPBP1	3837	87.829	chr9:88257741-88261333	83.7209	215	0.953226
AGTPBP1	3837	87.829	chr9:88284399-88327481	217.032	695	2.47107
AGTPBP1	3837	87.829	chr9:88307603-88327481	195.595	190	2.22699
AGTPBP1	3837	87.829	chr9:88211276-88248289	72.5825	1121	0.826407
AIG1	738	646.172	chr6:143486218-143605362	362.385	218	0.560819
AKAP10	1989	64.3539	chr17:19861326-19861884	107.527	558	1.67087
AKAP7	1053	129.657	chr6:131466424-131490413	206.956	570	1.59618
AKAP7	1053	129.657	chr6:131481198-131490413	51.2763	438	0.395476
AKIRIN1	579	105.354	chr1:39463842-39466778	177.536	276	1.68514
AKIRIN2	612	303.922	chr6:88385577-88391481	278.689	366	0.916975
AKT3	1440	585.087	chr1:243675625-243736350	69.9954	658	0.119633
AKT3	1440	585.087	chr1:243708811-243727150	160.912	432	0.275023
AKT3	1440	585.087	chr1:243776972-243859018	484.162	650	0.827504
AKT3	1440	585.087	chr1:243776972-244006584	301.769	808	0.515767
AKT3	1440	585.087	chr1:243736227-243859018	212.128	773	0.362558
ALG8	1581	71.4959	chr11:77823695-77832220	164.151	530	2.29595
AMD1	1389	1111.69	chr6:111208707-111211559	2936.91	317	2.64184
AMN1	777	128.7	chr12:31841940-31872290	62.5252	874	0.485821
AMN1	777	128.7	chr12:31841940-31854941	73.9718	532	0.574761
ANAPC5	2268	175.963	chr12:121768385-121784808	264.671	835	1.50413
ANGPT1	1497	321.563	chr8:108276448-108315595	149.994	528	0.466454
ANGPT1	1497	321.563	chr8:108348377-108359325	335.838	278	1.04439
ANGPT1	1497	321.563	chr8:108334126-108359325	208.325	508	0.64785
ANGPT1	1497	321.563	chr8:108296909-108315595	140.28	397	0.436243
ANKIB1	3270	66.055	chr7:91924202-91948826	247.415	759	3.74559
ANKRD11	7992	228.103	chr16:89484691-89497734	89.7436	156	0.393435
ANKRD12	6189	353.228	chr18:9208654-9221997	1806.4	639	5.11398
ANKRD12	6189	353.228	chr18:9182379-9216898	274.965	846	0.778433
ANKRD12	6189	353.228	chr18:9182379-9195696	1994.53	286	5.64659
ANKRD12	6189	353.228	chr18:9195548-9211782	723.628	565	2.04861
ANKRD13C	1626	81.7964	chr1:70758070-70771973	237.872	506	2.90809
ANKRD17	7812	55.5556	chr4:73950965-73958017	234.17	1832	4.21507
ANKRD28	3162	748.466	chr3:15726732-15731727	127.389	628	0.1702
ANKRD28	3162	748.466	chr3:15793256-15855816	653.595	304	0.873247
ANKRD28	3162	748.466	chr3:15753646-15766031	263.773	633	0.352418
ANKRD28	3162	748.466	chr3:15762421-15793327	210.605	716	0.281382
ANKRD28	3162	748.466	chr3:15776916-15793327	290.408	360	0.388005
ANKRD36BP2	0	NA	chr2:89082250-89092011	62.1902	615	0
ANKRD36BP2	0	NA	chr2:89084114-89092011	89.8694	513	0
ANO6	2796	561.159	chr12:45725077-45742414	437.866	597	0.780289
ANO6	2796	561.159	chr12:45814853-45816845	165.049	309	0.294121
ANO6	2796	561.159	chr12:45695796-45771896	174.184	1095	0.3104
ANO6	2796	561.159	chr12:45781943-45797319	253.671	715	0.452049
ANO6	2796	561.159	chr12:45771835-45784281	110.616	443	0.197121
ANO6	2796	561.159	chr12:45725077-45761576	370.35	954	0.659974
ANO6	2796	561.159	chr12:45781943-45803270	152.684	846	0.272088
ANP32B	756	428.571	chr9:100756912-100760960	241.553	273	0.563624
ANP32B	756	428.571	chr9:100756912-100767435	370.892	463	0.865415
ANP32E	807	54.5229	chr1:150198939-150201570	83.9605	354	1.53991
ANTXR2	1470	92.002	chr4:80929674-80957186	101.235	405	1.10035
AP1G1	2478	138.014	chr16:71780490-71787790	249.475	501	1.80761
AP1G1	2478	138.014	chr16:71779046-71779517	301.115	269	2.18177
AP1G1	2478	138.014	chr16:71783796-71784235	79.8732	213	0.578732
AP1G1	2478	138.014	chr16:71772844-71773244	185.874	269	1.34677
AP3S1	582	190.722	chr5:115202366-115205825	264.706	204	1.38792
AP3S2	618	124.595	chr15:90414706-90432372	282.609	276	2.26821
AP4S1	480	133.456	chr14:31535331-31542179	117.808	365	0.882748
APIP	729	57.6132	chr11:34904222-34910416	67.4956	563	1.17153
APLF	1536	370.443	chr2:68717321-68753374	134.582	708	0.3633
APLF	1536	370.443	chr2:68794472-68805135	178.431	346	0.481668
APLF	1536	370.443	chr2:68717321-68794519	268.601	1237	0.725081
APLF	1536	370.443	chr2:68717321-68740812	224.833	526	0.606929
APOOL	807	315.03	chrX:84322132-84329397	762.346	324	2.41992
APPL1	2130	188.78	chr3:57293055-57301820	59.0994	463	0.313059
APPL1	2130	188.78	chr3:57276883-57287766	70.9091	737	0.375617
APPL1	2130	188.78	chr3:57276883-57282379	694.129	448	3.67692
ARCN1	1659	87.3942	chr11:118453893-118455359	129.873	551	1.48606
ARCN1	1659	87.3942	chr11:118451960-118455359	83.9755	815	0.960881
ARFGEF1	5550	84.5045	chr8:68163533-68172161	71.8198	727	0.849893
ARFGEF1	5550	84.5045	chr8:68178240-68189692	95.2108	1096	1.12669
ARFGEF1	5550	84.5045	chr8:68200189-68214701	259.143	903	3.06662
ARFGEF1	5550	84.5045	chr8:68211443-68213615	119.503	304	1.41416
ARHGAP10	2361	381.194	chr4:148800382-148834290	152.273	396	0.399462
ARHGAP10	2361	381.194	chr4:148860975-148876525	604.59	222	1.58604
ARHGAP10	2361	381.194	chr4:148796171-148803083	206.614	332	0.542019
ARHGAP10	2361	381.194	chr4:148778703-148796301	102.045	448	0.267697
ARHGAP10	2361	381.194	chr4:148778703-148787967	370.682	318	0.972423
ARHGAP10	2361	381.194	chr4:148886174-148887990	343.246	122	0.900448
ARHGAP10	2361	381.194	chr4:148867767-148887990	163.586	413	0.42914
ARHGAP10	2361	381.194	chr4:148876466-148887990	96.4431	325	0.253002
ARHGAP10	2361	381.194	chr4:148743877-148744108	2664.56	158	6.99002
ARHGAP15	1428	67.4153	chr2:144193169-144276933	157.053	451	2.32964
ARHGAP18	1992	295.181	chr6:129932677-129939997	289.699	336	0.981431
ARHGAP18	1992	295.181	chr6:129921786-129939997	89.2634	786	0.302402
ARHGAP18	1992	295.181	chr6:129959538-129963163	469.248	439	1.5897
ARHGAP21	5877	77.3869	chr10:24918924-24959326	332.109	432	4.29154
ARHGAP21	5877	77.3869	chr10:24908401-24924032	53.396	2154	0.689987
ARHGAP21	5877	77.3869	chr10:24918924-24924032	154.423	227	1.99546
ARHGAP6	2925	69.7439	chrX:11187624-11207104	122.055	989	1.75004
ARHGAP6	2925	69.7439	chrX:11204355-11207104	95.5585	453	1.37013
ARHGEF12	4635	253.566	chr11:120310837-120316173	58.6821	346	0.231427
ARHGEF12	4635	253.566	chr11:120276826-120292561	1016.35	259	4.00823
ARHGEF12	4635	253.566	chr11:120310837-120317794	102.875	590	0.405711
ARHGEF12	4635	253.566	chr11:120328429-120330029	68.0473	338	0.268362
ARHGEF12	4635	253.566	chr11:120276826-120280159	3555.25	167	14.021
ARHGEF3	1677	63.8044	chr3:56771212-56779490	339.753	429	5.32491
ARHGEF3	1677	63.8044	chr3:56779232-56779490	326.76	258	5.12127
ARID2	5508	51.6954	chr12:46285562-46287504	57.6735	441	1.11564
ARID2	5508	51.6954	chr12:46230371-46233279	90.7945	793	1.75634
ARIH1	1674	127.852	chr15:72810407-72853890	152.254	429	1.19086
ARL13B	1287	83.2176	chr3:93722502-93722752	215.884	250	2.59421
ARL13B	1287	83.2176	chr3:93714717-93722752	142.038	443	1.70683
ARL8B	561	456.44	chr3:5212187-5216099	374.263	388	0.81996
ARL8B	561	456.44	chr3:5215701-5216099	156.734	139	0.343383
ARMC8	2022	304.649	chr3:137982580-138003368	108.057	687	0.354693
ARMC8	2022	304.649	chr3:137940767-137947852	86.8153	406	0.284968
ARMC8	2022	304.649	chr3:137993290-138009481	107.981	359	0.354442
ARMC8	2022	304.649	chr3:137928658-137956414	150.848	731	0.495154
ARMC8	2022	304.649	chr3:137956323-137964025	163.492	449	0.536658
ARMC8	2022	304.649	chr3:137940767-137942575	171.693	313	0.563578
ARMC8	2022	304.649	chr3:137907296-137942575	250.161	466	0.821145
ARMC8	2022	304.649	chr3:137947759-137953956	267.132	174	0.876853
ARPC1B	1119	659.446	chr7:98984307-98987635	243.119	436	0.368672
ARPC2	903	853.919	chr2:219103386-219110269	808.6	408	0.946929
ARPC2	903	853.919	chr2:219110142-219114644	373.271	329	0.437126
ARPC2	903	853.919	chr2:219114086-219114644	234.084	202	0.274129
ASAP1	3390	513.068	chr8:131249167-131370389	293.345	200	0.571747
ASAP1	3390	513.068	chr8:131092147-131104389	327.801	241	0.638903
ASAP1	3390	513.068	chr8:131172109-131181313	481.879	273	0.939211
ASAP1	3390	513.068	chr8:131172109-131199531	253.058	530	0.493226
ASAP1	3390	513.068	chr8:131146541-131193126	222.539	687	0.433741
ASAP1	3390	513.068	chr8:131130406-131138335	125.902	499	0.24539
ASAP1	3390	513.068	chr8:131164981-131193126	636.707	550	1.24098
ASAP1	3390	513.068	chr8:131179781-131193126	156.074	379	0.304197
ASAP1	3390	513.068	chr8:131199481-131249240	219.834	344	0.42847
ASAP1	3390	513.068	chr8:131226801-131249240	478.489	219	0.932603
ASAP1	3390	513.068	chr8:131164981-131181313	699.327	343	1.36303
ASAP1	3390	513.068	chr8:131172109-131193126	708.652	480	1.38121
ASAP2	3021	213.795	chr2:9484660-9491024	199.588	262	0.933547
ASAP2	3021	213.795	chr2:9419445-9437574	177.279	219	0.829198
ASAP2	3021	213.795	chr2:9458652-9475308	178.663	504	0.835673
ASAP2	3021	213.795	chr2:9490936-9496474	205.688	304	0.962078
ASAP2	3021	213.795	chr2:9496175-9508648	75.4944	445	0.353116
ASAP2	3021	213.795	chr2:9496175-9499018	209.537	350	0.980084
ASAP2	3021	213.795	chr2:9437428-9474942	122.453	563	0.572758
ASAP2	3021	213.795	chr2:9490936-9499018	174.078	438	0.814226
ASAP2	3021	213.795	chr2:9458652-9468040	161.845	341	0.757008
ASH2L	1887	99.629	chr8:37971709-37976881	403.052	362	4.04553
ASH2L	1887	99.629	chr8:37967896-37976881	82.4249	546	0.827318
ASPH	2277	214.317	chr8:62593526-62596747	1202.38	84	5.61029
ASPH	2277	214.317	chr8:62489330-62546286	75.1	260	0.350415
ASPH	2277	214.317	chr8:62531536-62557191	193.381	357	0.902312
ASPH	2277	214.317	chr8:62531536-62566219	306.479	654	1.43002
ATAD2B	4377	124.743	chr2:24042616-24051809	80.608	602	0.646194
ATAD2B	4377	124.743	chr2:24103508-24108699	250.207	329	2.00578
ATAD2B	4377	124.743	chr2:24046127-24046439	160.978	312	1.29048
ATAD2B	4377	124.743	chr2:24103508-24111269	71.2064	533	0.570826
ATAD2B	4377	124.743	chr2:24021007-24056948	161.815	1072	1.29719
ATAD2B	4377	124.743	chr2:24098698-24103625	62.9637	193	0.504749
ATAD2B	4377	124.743	chr2:24042616-24046439	180.768	448	1.44913
ATE1	1557	308.367	chr10:123661905-123681926	276.364	643	0.896216
ATE1	1557	308.367	chr10:123600596-123683844	64.0999	1051	0.207869
ATE1	1557	308.367	chr10:123596232-123629553	108.324	315	0.351282
ATE1	1557	308.367	chr10:123549683-123629553	117.041	436	0.379551
ATE1	1557	308.367	chr10:123673304-123683844	436.264	231	1.41475
ATF1	816	52.6961	chr12:51173922-51203372	77.8443	334	1.47723
ATF2	1518	403.821	chr2:175945387-175986268	162.223	1189	0.40172
ATF2	1518	403.821	chr2:175976295-175986268	545.05	726	1.34973
ATF7IP	3837	113.655	chr12:14576842-14619524	116.388	2866	1.02404
ATF7IP	3837	113.655	chr12:14609494-14610229	333.945	163	2.93823
ATF7IP2	2049	76.5939	chr16:10513437-10567846	83.8498	1751	1.09473
ATG4C	1377	148.874	chr1:63294710-63307218	58.1114	413	0.390338
ATG4C	1377	148.874	chr1:63269389-63286880	214.12	864	1.43826
ATG5	828	74.8792	chr6:106696024-106740981	73.5193	337	0.981838
ATG5	828	74.8792	chr6:106727535-106756366	100.605	370	1.34357
ATM	9171	26890.7	chr11:108137897-108138069	203.488	172	0.00756724
ATP23	741	66.1269	chr12:58340777-58347472	187.5	304	2.83546
ATP2C1	2922	119.438	chr3:130649259-130660543	346.92	525	2.90459
ATP2C1	2922	119.438	chr3:130656271-130675023	57.4075	508	0.480645
ATP2C1	2922	119.438	chr3:130685988-130688240	79.945	291	0.669341
ATP6V0A1	2517	81.0485	chr17:40650941-40653322	470.721	444	5.80789
ATP6V1C1	1149	135.841	chr8:104053025-104054635	108.787	239	0.800839
ATP8A1	3495	385.694	chr4:42505466-42526864	567.214	429	1.47063
ATP8A1	3495	385.694	chr4:42602494-42627730	204.787	286	0.530957
ATP8A1	3495	385.694	chr4:42577638-42590346	454.359	682	1.17803
ATP8A1	3495	385.694	chr4:42487512-42526864	159.968	602	0.414755
ATP8A1	3495	385.694	chr4:42505466-42546003	127.573	499	0.330763
ATP8A1	3495	385.694	chr4:42618049-42629126	511.781	360	1.32691
ATP8A1	3495	385.694	chr4:42553214-42558057	314.943	262	0.816562
ATP8A1	3495	385.694	chr4:42576635-42588493	135.829	701	0.352167
ATP8A1	3495	385.694	chr4:42545933-42558057	417.136	382	1.08152
ATP8A1	3495	385.694	chr4:42505466-42509171	458.637	204	1.18912
ATP9B	3444	126.069	chr18:76856475-76914555	174.827	659	1.38676
ATP9B	3444	126.069	chr18:76953182-76974038	476.38	234	3.77872
ATP9B	3444	126.069	chr18:76886266-76914555	184.25	220	1.4615
ATP9B	3444	126.069	chr18:76903801-76974038	160.866	440	1.27601
ATXN10	1428	125.414	chr22:46125304-46136418	103.193	445	0.822822
ATXN10	1428	125.414	chr22:46085591-46136418	77.9886	1057	0.62185
ATXN10	1428	125.414	chr22:46096161-46125470	94.7197	503	0.755257
ATXN2	3942	230.729	chr12:111990083-111993723	1290.77	320	5.5943
ATXN2	3942	230.729	chr12:111923068-111926584	191.129	589	0.828372
ATXN2	3942	230.729	chr12:111923074-111924628	597.73	278	2.59062
ATXN2	3942	230.729	chr12:111947352-111948386	262.599	377	1.13813
ATXN2	3942	230.729	chr12:111907911-111908546	113.208	318	0.490653
ATXN2	3942	230.729	chr12:111920590-111924628	81.291	323	0.352323
ATXN3	1113	58.4007	chr14:92555073-92563182	69.1675	406	1.18436
AURKA	1212	137.789	chr20:54956488-54959380	375.648	386	2.72626
AURKA	1212	137.789	chr20:54961312-54963258	129.63	324	0.940785
AZIN1	1347	229.399	chr8:103846416-103851144	77.0796	465	0.336007
AZIN1	1347	229.399	chr8:103850971-103855975	177.107	544	0.772047
AZIN1	1347	229.399	chr8:103845283-103848618	96.2901	455	0.41975
B4GALT6	1149	180.157	chr18:29210921-29246335	51.0998	661	0.283641
B4GALT6	1149	180.157	chr18:29218606-29246335	368.336	473	2.04453
BANK1	2358	405.449	chr4:102942670-102965064	377.457	763	0.930962
BANK1	2358	405.449	chr4:102750964-102791801	393.22	833	0.969838
BANK1	2358	405.449	chr4:102791661-102839346	343.323	443	0.846773
[truncated: 2,367 more rows]
